# Supplementary material for: A stochastic RNA editing process targets a select number of sites in individual Drosophila glutamatergic motoneurons
Source: bioRxiv preprint, doi:10.1101/2024.05.17.594696, version 2 (2025-07-01)
Supplement: Supplemental Table 1 [file 594696_file03.xlsx]

## Sheet: Column descriptions
Column Title	Description
CellID	A unique identifying number given to each cell sequenced
CellType	Either Ib, Is, or M (muscle)
Gene	Name of gene
FlybaseID	The Flybase ID of the gene
DNAstrand	DNA strand upon which the gene is located
Edit Position	Position of the edit in the genome, formatted as chromosome:position
FractionOfReadsEdited	Fraction of reads at this site which did not match the genomic DNA sequence
CHROM	The chromosome this edit is located in
POS	The numerical position along the chromosome this edit is located at.
REF	The reference DNA base at this position from the drosophila reference genome
ALT	The alternative (RNA edited) base detected in RNA sequencing
BiologicalBaseChange	Because some genes are located on the minus DNA strand but RNA sequencing aligns to the plus DNA strand, edits on the minus strand need to find their complement to understand the correct effect the edit will have on the RNA produced. This column shows the true biological base change that will be found in the RNA.
Canonical	True means the biological effect of the edit is A-to-G. False means not A-to-G.
Depth	Read depth at this site (pulled from "DP" field in the INFO column for easy access)
QUAL	A measure of the quality of the variant call based on quality of reads at this site (output of samtools/GATK variant calls)
INFO	Information about the current edit (output of samtools/GATK variant calls)
FORMAT	Format for the "details" column, where each set of numbers is delimited by a colon (output of samtools/GATK variant calls). For example, the first output is GT (genotype), which is either 0/1,0/0,or1/1 in the details column.
DETAILS	Details about the variant (output of samtools/GATK variant calls)
Filter	A measure of which cumulative filters this edit passed during processing steps. 1 means minimum depth was over 10 reads. 2 means minimum quality was over 20. 3 means minimum editing rate was >0.1. 4 means at least 10 Ib or Is cells had this edit. Filters are applied 1-->2-->3-->4 so if an edit says Filter=3, that means it passed filter 3 but not filter 4.
Gene TPM in Ib	Expression level of gene in Ib cells, expressed in transcripts per million. Numbers from Jetti et al, 2023.
Gene TPM in Is	Expression level of gene in Is cells, expressed in transcripts per million. Numbers from Jetti et al, 2023.
Gene TPM adj pval	The p-value (adjusted for multiple tests) comparing expression level of the gene between Ib and Is. Numbers from Jetti et al, 2023.
Gene TPM in M1	Expression level of gene in muscle 1 cells, expressed in transcripts per million. Numbers from Jetti et al, 2023.
Gene TPM in M4	Expression level of gene in muscle 4 cells, expressed in transcripts per million. Numbers from Jetti et al, 2023.
ADAR TPM	Transcripts per million of ADAR mRNA detected in the current cell

## Sheet: Sheet1
CellID	CellType	Gene	FlybaseID	DNAstrand	Edit Position	FractionOfReadsEdited	CHROM	POS	REF	ALT	BiologicalBaseChange	Canonical	Depth	QUAL	INFO	FORMAT	DETAILS	Filter	Gene TPM in Ib	Gene TPM in Is	Gene TPM adj pval	Gene TPM in M1	Gene TPM in M4	ADAR TPM
d225003	Ib	IA-2	FBgn0031294	-1	2L:1010857	0.226852	2L	1010857	T	C	AG	TRUE	433	2089.6	AC=1;AF=0.500;AN=2;BaseQRankSum=6.161;DP=433;ExcessHet=3.0103;FS=2.167;MLEAC=1;MLEAF=0.500;MQ=60.00;MQRankSum=0.000;QD=4.84;ReadPosRankSum=-1.492;SOR=0.930	GT:AD:DP:GQ:PL	0/1:334,98:432:99:2097,0,9635	4	6.54402	7.83614	2.09102e-08	0.302821	0.331543	0
d225003	Ib	Rab6	FBgn0015797	-1	2L:12107332	0.109091	2L	12107332	T	C	AG	TRUE	55	73.6	AC=1;AF=0.500;AN=2;BaseQRankSum=-4.057;DP=55;ExcessHet=3.0103;FS=0.000;MLEAC=1;MLEAF=0.500;MQ=60.00;MQRankSum=0.000;QD=1.34;ReadPosRankSum=1.535;SOR=0.429	GT:AD:DP:GQ:PL	0/1:49,6:55:81:81,0,1924	4	5.65149	5.3903	0.997475	2.97474	2.86663	0
d225003	Ib	Mad	FBgn0011648	-1	2L:3146192	1	2L	3146192	T	C	AG	TRUE	26	865.03	AC=2;AF=1.00;AN=2;DP=26;ExcessHet=3.0103;FS=0.000;MLEAC=2;MLEAF=1.00;MQ=60.00;QD=33.27;SOR=2.670	GT:AD:DP:GQ:PL	1/1:0,26:26:77:879,77,0	4	1.75284	1.88178	0.972851	2.04554	1.70678	0
d225003	Ib	CG9662	FBgn0031529	-1	2L:3375848	0.745455	2L	3375848	T	C	AG	TRUE	55	1345.6	AC=1;AF=0.500;AN=2;BaseQRankSum=3.306;DP=55;ExcessHet=3.0103;FS=0.000;MLEAC=1;MLEAF=0.500;MQ=60.00;MQRankSum=0.000;QD=24.47;ReadPosRankSum=1.068;SOR=0.582	GT:AD:DP:GQ:PL	0/1:14,41:55:99:1353,0,302	4	4.79971	4.26303	0.58721	2.25071	2.37554	0
d225003	Ib	Thor	FBgn0261560	1	2L:3478627	0.671348	2L	3478627	A	G	AG	TRUE	713	15278.6	AC=1;AF=0.500;AN=2;BaseQRankSum=15.966;DP=713;ExcessHet=3.0103;FS=0.000;MLEAC=1;MLEAF=0.500;MQ=60.00;MQRankSum=0.000;QD=21.46;ReadPosRankSum=0.960;SOR=0.673	GT:AD:DP:GQ:PL	0/1:234,478:712:99:15286,0,4844	4	4.02038	3.58018	0.652908	11.318	10.933	0
d225003	Ib	fipi	FBgn0031627	-1	2L:4735173	0.34507	2L	4735173	T	C	AG	TRUE	142	1339.6	AC=1;AF=0.500;AN=2;BaseQRankSum=6.269;DP=142;ExcessHet=3.0103;FS=0.654;MLEAC=1;MLEAF=0.500;MQ=60.00;MQRankSum=0.000;QD=9.43;ReadPosRankSum=-1.270;SOR=0.674	GT:AD:DP:GQ:PL	0/1:93,49:142:99:1347,0,2710	4	5.70931	5.32823	0.250204	0.307762	0.421432	0
d225003	Ib	nrv2	FBgn0015777	-1	2L:6789976	1	2L	6789976	T	C	AG	TRUE	213	7901.03	AC=2;AF=1.00;AN=2;DP=213;ExcessHet=3.0103;FS=0.000;MLEAC=2;MLEAF=1.00;MQ=60.00;QD=29.65;SOR=2.889	GT:AD:DP:GQ:PL	1/1:0,213:213:99:7915,638,0	4	3.48474	2.11119	0.017969	1.38147	1.80436	0
d225003	Ib	Nckx30C	FBgn0028704	-1	2L:9717614	0.99187	2L	9717614	T	C	AG	TRUE	123	4193.03	AC=2;AF=1.00;AN=2;BaseQRankSum=-1.597;DP=123;ExcessHet=3.0103;FS=0.000;MLEAC=2;MLEAF=1.00;MQ=60.00;MQRankSum=0.000;QD=34.09;ReadPosRankSum=1.624;SOR=0.332	GT:AD:DP:GQ:PL	1/1:1,122:123:99:4207,331,0	4	4.99389	4.09503	0.0412382	0.0832012	0.108464	0
d225003	Ib	Nckx30C	FBgn0028704	-1	2L:9733349	1	2L	9733349	T	C	AG	TRUE	31	1098.03	AC=2;AF=1.00;AN=2;DP=31;ExcessHet=3.0103;FS=0.000;MLEAC=2;MLEAF=1.00;MQ=60.00;QD=31.08;SOR=0.756	GT:AD:DP:GQ:PL	1/1:0,31:31:93:1112,93,0	4	4.99389	4.09503	0.0412382	0.0832012	0.108464	0
d225003	Ib	RpS15Ab	FBgn0033555	1	2R:10822309	0.154545	2R	10822309	A	G	AG	TRUE	112	251.6	AC=1;AF=0.500;AN=2;BaseQRankSum=2.482;DP=112;ExcessHet=3.0103;FS=102.186;MLEAC=1;MLEAF=0.500;MQ=60.00;MQRankSum=0.000;QD=2.29;ReadPosRankSum=-2.461;SOR=5.781	GT:AD:DP:GQ:PL	0/1:93,17:110:99:259,0,2656	4	3.76529	3.1313	0.134754	5.69163	5.75158	0
d225003	Ib	Prp8	FBgn0033688	-1	2R:12162664	0.991803	2R	12162664	T	C	AG	TRUE	122	4299.03	AC=2;AF=1.00;AN=2;BaseQRankSum=1.251;DP=122;ExcessHet=3.0103;FS=3.382;MLEAC=2;MLEAF=1.00;MQ=60.00;MQRankSum=0.000;QD=31.36;ReadPosRankSum=1.081;SOR=0.520	GT:AD:DP:GQ:PL	1/1:1,121:122:99:4313,331,0	4	2.25265	2.28292	0.753948	0.79197	1.00345	0
d225003	Ib	Vha16-1	FBgn0262736	-1	2R:6626171	0.219178	2R	6626171	T	C	AG	TRUE	146	704.6	AC=1;AF=0.500;AN=2;BaseQRankSum=4.935;DP=146;ExcessHet=3.0103;FS=76.767;MLEAC=1;MLEAF=0.500;MQ=60.00;MQRankSum=0.000;QD=4.83;ReadPosRankSum=-1.618;SOR=3.089	GT:AD:DP:GQ:PL	0/1:114,32:146:99:712,0,3339	4	8.42356	8.78145	0.297901	6.11325	6.08202	0
d225003	Ib	Uba1	FBgn0023143	-1	2R:9688858	0.181818	2R	9688858	T	C	AG	TRUE	396	1438.6	AC=1;AF=0.500;AN=2;BaseQRankSum=10.023;DP=396;ExcessHet=3.0103;FS=2.197;MLEAC=1;MLEAF=0.500;MQ=60.00;MQRankSum=0.000;QD=3.63;ReadPosRankSum=-1.199;SOR=0.560	GT:AD:DP:GQ:PL	0/1:324,72:396:99:1446,0,8159	4	4.58023	4.88416	0.433921	3.14724	3.06775	0
d225003	Ib	Uba1	FBgn0023143	-1	2R:9689431	0.427711	2R	9689431	T	C	AG	TRUE	167	2063.6	AC=1;AF=0.500;AN=2;BaseQRankSum=9.032;DP=167;ExcessHet=3.0103;FS=37.909;MLEAC=1;MLEAF=0.500;MQ=60.00;MQRankSum=0.000;QD=12.43;ReadPosRankSum=-1.090;SOR=0.353	GT:AD:DP:GQ:PL	0/1:95,71:166:99:2071,0,2487	4	4.58023	4.88416	0.433921	3.14724	3.06775	0
d225003	Ib	Pka-R2	FBgn0022382	-1	2R:9994533	0.735714	2R	9994533	T	C	AG	TRUE	140	3157.6	AC=1;AF=0.500;AN=2;BaseQRankSum=4.977;DP=140;ExcessHet=3.0103;FS=4.905;MLEAC=1;MLEAF=0.500;MQ=60.00;MQRankSum=0.000;QD=22.55;ReadPosRankSum=-0.431;SOR=0.344	GT:AD:DP:GQ:PL	0/1:37,103:140:99:3165,0,758	4	4.61114	4.8641	0.950267	2.30218	2.12679	0
d225003	Ib	RpS4	FBgn0011284	1	3L:13043906	0.15	3L	13043906	A	G	AG	TRUE	20	44.6	AC=1;AF=0.500;AN=2;BaseQRankSum=2.174;DP=20;ExcessHet=3.0103;FS=0.000;MLEAC=1;MLEAF=0.500;MQ=60.00;MQRankSum=0.000;QD=2.23;ReadPosRankSum=0.000;SOR=0.446	GT:AD:DP:GQ:PL	0/1:17,3:20:52:52,0,495	4	11.7053	11.6919	0.574608	10.8292	10.6055	0
d225003	Ib	sls	FBgn0086906	-1	3L:2039918	1	3L	2039918	T	C	AG	TRUE	173	6159.03	AC=2;AF=1.00;AN=2;DP=173;ExcessHet=3.0103;FS=0.000;MLEAC=2;MLEAF=1.00;MQ=60.00;QD=34.30;SOR=1.146	GT:AD:DP:GQ:PL	1/1:0,173:173:99:6173,518,0	4	1.73916	1.70201	0.199811	4.24108	3.91505	0
d225003	Ib	CG32264	FBgn0052264	-1	3L:3717400	1	3L	3717400	T	C	AG	TRUE	19	812.03	AC=2;AF=1.00;AN=2;DP=19;ExcessHet=3.0103;FS=0.000;MLEAC=2;MLEAF=1.00;MQ=60.00;QD=32.94;SOR=1.981	GT:AD:DP:GQ:PL	1/1:0,19:19:57:826,57,0	4	3.4169	3.8072	0.084539	3.09462	2.70509	0
d225003	Ib	nAChRbeta1	FBgn0000038	1	3L:4429963	0.742857	3L	4429963	A	G	AG	TRUE	525	13602.6	AC=1;AF=0.500;AN=2;BaseQRankSum=12.166;DP=525;ExcessHet=3.0103;FS=1.424;MLEAC=1;MLEAF=0.500;MQ=60.00;MQRankSum=0.000;QD=25.91;ReadPosRankSum=0.236;SOR=0.585	GT:AD:DP:GQ:PL	0/1:135,390:525:99:13610,0,2819	4	6.35534	5.5438	0.188032	0.118617	0.0901246	0
d225003	Ib	nAChRbeta1	FBgn0000038	1	3L:4429967	0.183673	3L	4429967	A	G	AG	TRUE	490	1790.6	AC=1;AF=0.500;AN=2;BaseQRankSum=9.167;DP=490;ExcessHet=3.0103;FS=5.000;MLEAC=1;MLEAF=0.500;MQ=60.00;MQRankSum=0.000;QD=3.65;ReadPosRankSum=1.529;SOR=1.132	GT:AD:DP:GQ:PL	0/1:400,90:490:99:1798,0,13995	4	6.35534	5.5438	0.188032	0.118617	0.0901246	0
d225003	Ib	nAChRbeta1	FBgn0000038	1	3L:4430208	0.336134	3L	4430208	A	G	AG	TRUE	239	2163.6	AC=1;AF=0.500;AN=2;BaseQRankSum=7.615;DP=239;ExcessHet=3.0103;FS=134.539;MLEAC=1;MLEAF=0.500;MQ=60.00;MQRankSum=0.000;QD=9.09;ReadPosRankSum=-0.798;SOR=5.473	GT:AD:DP:GQ:PL	0/1:158,80:238:99:2171,0,5909	4	6.35534	5.5438	0.188032	0.118617	0.0901246	0
d225003	Ib	Xrp1	FBgn0261113	1	3R:18918354	0.663717	3R	18918354	A	G	AG	TRUE	113	2213.6	AC=1;AF=0.500;AN=2;BaseQRankSum=2.782;DP=113;ExcessHet=3.0103;FS=10.039;MLEAC=1;MLEAF=0.500;MQ=60.00;MQRankSum=0.000;QD=19.59;ReadPosRankSum=0.061;SOR=1.608	GT:AD:DP:GQ:PL	0/1:38,75:113:99:2221,0,892	4	6.93525	6.63308	0.99582	5.49922	5.49918	0
d225003	Ib	CG42613	FBgn0261262	1	3R:18977756	1	3R	18977756	A	G	AG	TRUE	64	2754.03	AC=2;AF=1.00;AN=2;DP=64;ExcessHet=3.0103;FS=0.000;MLEAC=2;MLEAF=1.00;MQ=60.00;QD=31.17;SOR=0.756	GT:AD:DP:GQ:PL	1/1:0,64:64:99:2768,198,0	4	3.85208	4.55131	0.161142	0.0438153	0.0533868	0
d225003	Ib	Atpalpha	FBgn0002921	1	3R:20964328	0.320567	3R	20964328	A	G	AG	TRUE	707	5727.6	AC=1;AF=0.500;AN=2;BaseQRankSum=4.005;DP=707;ExcessHet=3.0103;FS=0.562;MLEAC=1;MLEAF=0.500;MQ=60.00;MQRankSum=0.000;QD=8.12;ReadPosRankSum=0.929;SOR=0.804	GT:AD:DP:GQ:PL	0/1:479,226:705:99:5735,0,14257	4	9.18942	9.08294	0.418439	4.40032	4.50151	0
d225003	Ib	Cow	FBgn0039054	-1	3R:23112549	0.452128	3R	23112549	T	C	AG	TRUE	188	2480.6	AC=1;AF=0.500;AN=2;BaseQRankSum=8.257;DP=188;ExcessHet=3.0103;FS=5.135;MLEAC=1;MLEAF=0.500;MQ=60.00;MQRankSum=0.000;QD=13.19;ReadPosRankSum=-0.629;SOR=0.938	GT:AD:DP:GQ:PL	0/1:103,85:188:99:2488,0,2745	4	6.07048	6.14794	0.757327	0.0371922	0.0664222	0
d225003	Ib	ATPsynCF6	FBgn0016119	-1	3R:23355357	1	3R	23355357	T	C	AG	TRUE	164	6901.03	AC=2;AF=1.00;AN=2;DP=164;ExcessHet=3.0103;FS=0.000;MLEAC=2;MLEAF=1.00;MQ=60.00;QD=25.73;SOR=2.709	GT:AD:DP:GQ:PL	1/1:0,164:164:99:6915,502,0	4	9.01907	8.99728	0.563116	8.34196	8.52202	0
d225003	Ib	Ald1	FBgn0000064	-1	3R:26254245	0.369048	3R	26254245	T	C	AG	TRUE	336	3242.6	AC=1;AF=0.500;AN=2;BaseQRankSum=6.028;DP=336;ExcessHet=3.0103;FS=0.000;MLEAC=1;MLEAF=0.500;MQ=60.00;MQRankSum=0.000;QD=9.65;ReadPosRankSum=0.058;SOR=0.680	GT:AD:DP:GQ:PL	0/1:212,124:336:99:3250,0,5817	4	11.4026	10.0568	0.0414265	10.8637	11.1339	0
d225003	Ib	Ald1	FBgn0000064	-1	3R:26254381	0.366548	3R	26254381	T	C	AG	TRUE	281	2875.6	AC=1;AF=0.500;AN=2;BaseQRankSum=7.213;DP=281;ExcessHet=3.0103;FS=6.845;MLEAC=1;MLEAF=0.500;MQ=60.00;MQRankSum=0.000;QD=10.23;ReadPosRankSum=0.119;SOR=1.090	GT:AD:DP:GQ:PL	0/1:178,103:281:99:2883,0,5280	4	11.4026	10.0568	0.0414265	10.8637	11.1339	0
d225003	Ib	cpx	FBgn0041605	1	3R:4297504	0.762295	3R	4297504	A	G	AG	TRUE	122	3169.6	AC=1;AF=0.500;AN=2;BaseQRankSum=5.120;DP=122;ExcessHet=3.0103;FS=3.219;MLEAC=1;MLEAF=0.500;MQ=60.00;MQRankSum=0.000;QD=25.98;ReadPosRankSum=1.819;SOR=1.476	GT:AD:DP:GQ:PL	0/1:29,93:122:99:3177,0,667	4	7.90852	7.29727	0.637321	0.177459	0.228242	0
d225003	Ib	cpx	FBgn0041605	1	3R:4297518	0.2	3R	4297518	A	G	AG	TRUE	210	896.6	AC=1;AF=0.500;AN=2;BaseQRankSum=5.125;DP=210;ExcessHet=3.0103;FS=4.700;MLEAC=1;MLEAF=0.500;MQ=60.00;MQRankSum=0.000;QD=4.27;ReadPosRankSum=0.602;SOR=1.274	GT:AD:DP:GQ:PL	0/1:168,42:210:99:904,0,5331	4	7.90852	7.29727	0.637321	0.177459	0.228242	0
d225003	Ib	cpx	FBgn0041605	1	3R:4301142	0.234899	3R	4301142	A	G	AG	TRUE	149	1179.6	AC=1;AF=0.500;AN=2;BaseQRankSum=4.092;DP=149;ExcessHet=3.0103;FS=0.915;MLEAC=1;MLEAF=0.500;MQ=60.00;MQRankSum=0.000;QD=7.92;ReadPosRankSum=0.202;SOR=0.870	GT:AD:DP:GQ:PL	0/1:114,35:149:99:1187,0,4793	4	7.90852	7.29727	0.637321	0.177459	0.228242	0
d225003	Ib	cpx	FBgn0041605	1	3R:4301150	0.75	3R	4301150	A	G	AG	TRUE	144	4724.6	AC=1;AF=0.500;AN=2;BaseQRankSum=4.246;DP=144;ExcessHet=3.0103;FS=1.863;MLEAC=1;MLEAF=0.500;MQ=60.00;MQRankSum=0.000;QD=32.81;ReadPosRankSum=-0.861;SOR=0.476	GT:AD:DP:GQ:PL	0/1:36,108:144:99:4732,0,1295	4	7.90852	7.29727	0.637321	0.177459	0.228242	0
d225003	Ib	cpx	FBgn0041605	1	3R:4301154	0.751634	3R	4301154	A	G	AG	TRUE	153	4732.6	AC=1;AF=0.500;AN=2;BaseQRankSum=3.635;DP=153;ExcessHet=3.0103;FS=2.787;MLEAC=1;MLEAF=0.500;MQ=60.00;MQRankSum=0.000;QD=30.93;ReadPosRankSum=-0.949;SOR=0.467	GT:AD:DP:GQ:PL	0/1:38,115:153:99:4740,0,1295	4	7.90852	7.29727	0.637321	0.177459	0.228242	0
d225003	Ib	cpx	FBgn0041605	1	3R:4301158	0.241379	3R	4301158	A	G	AG	TRUE	145	1196.6	AC=1;AF=0.500;AN=2;BaseQRankSum=4.731;DP=145;ExcessHet=3.0103;FS=1.770;MLEAC=1;MLEAF=0.500;MQ=60.00;MQRankSum=0.000;QD=8.25;ReadPosRankSum=0.879;SOR=0.883	GT:AD:DP:GQ:PL	0/1:110,35:145:99:1204,0,4833	4	7.90852	7.29727	0.637321	0.177459	0.228242	0
d225003	Ib	CG1090	FBgn0037238	1	3R:4365385	0.8	3R	4365385	A	G	AG	TRUE	20	505.6	AC=1;AF=0.500;AN=2;BaseQRankSum=2.163;DP=20;ExcessHet=3.0103;FS=5.727;MLEAC=1;MLEAF=0.500;MQ=60.00;MQRankSum=0.000;QD=25.28;ReadPosRankSum=0.331;SOR=0.094	GT:AD:DP:GQ:PL	0/1:4,16:20:99:513,0,110	4	4.19836	3.59903	0.876728	0.070259	0.0808403	0
d225003	Ib	Vha26	FBgn0283535	1	3R:5594099	0.149296	3R	5594099	A	G	AG	TRUE	355	741.6	AC=1;AF=0.500;AN=2;BaseQRankSum=4.784;DP=355;ExcessHet=3.0103;FS=3.370;MLEAC=1;MLEAF=0.500;MQ=60.00;MQRankSum=0.000;QD=2.09;ReadPosRankSum=-0.652;SOR=0.860	GT:AD:DP:GQ:PL	0/1:302,53:355:99:749,0,8878	4	7.31501	7.15393	0.778039	4.68759	4.94428	0
d225003	Ib	hiw	FBgn0030600	-1	X:15010444	1	X	15010444	T	C	AG	TRUE	155	5538.03	AC=2;AF=1.00;AN=2;DP=155;ExcessHet=3.0103;FS=0.000;MLEAC=2;MLEAF=1.00;MQ=60.00;QD=38.32;SOR=2.198	GT:AD:DP:GQ:PL	1/1:0,155:155:99:5552,466,0	4	1.94674	2.4482	0.178417	0.0207204	0.0219914	0
d225003	Ib	ND-B18	FBgn0030605	1	X:15064404	0.170807	X	15064404	A	G	AG	TRUE	322	1088.6	AC=1;AF=0.500;AN=2;BaseQRankSum=8.421;DP=322;ExcessHet=3.0103;FS=41.954;MLEAC=1;MLEAF=0.500;MQ=60.00;MQRankSum=0.000;QD=3.38;ReadPosRankSum=-1.618;SOR=3.753	GT:AD:DP:GQ:PL	0/1:267,55:322:99:1096,0,7450	4	7.59932	6.95118	0.954122	6.45447	6.60477	0
d225003	Ib	Cox17	FBgn0030610	-1	X:15084514	1	X	15084514	T	C	AG	TRUE	158	5375.03	AC=2;AF=1.00;AN=2;DP=158;ExcessHet=3.0103;FS=0.000;MLEAC=2;MLEAF=1.00;MQ=60.00;QD=34.02;SOR=0.855	GT:AD:DP:GQ:PL	1/1:0,158:158:99:5389,458,0	4	5.69641	5.54231	0.382314	4.48811	4.0839	0
d225003	Ib	Sh	FBgn0003380	-1	X:17950057	1	X	17950057	T	C	AG	TRUE	26	959.03	AC=2;AF=1.00;AN=2;DP=26;ExcessHet=3.0103;FS=0.000;MLEAC=2;MLEAF=1.00;MQ=60.00;QD=24.04;SOR=1.981	GT:AD:DP:GQ:PL	1/1:0,26:26:78:973,78,0	4	5.78478	5.98037	0.885151	2.25586	1.88036	0
d225003	Ib	DIP1	FBgn0024807	-1	X:21629725	1	X	21629725	T	C	AG	TRUE	15	541.03	AC=2;AF=1.00;AN=2;DP=15;ExcessHet=3.0103;FS=0.000;MLEAC=2;MLEAF=1.00;MQ=60.00;QD=32.09;SOR=1.112	GT:AD:DP:GQ:PL	1/1:0,15:15:45:555,45,0	4	4.22571	4.66995	0.917906	1.90808	1.68313	0
d225003	Ib	ctp	FBgn0011760	1	X:4699254	0.654867	X	4699254	A	G	AG	TRUE	226	4527.6	AC=1;AF=0.500;AN=2;BaseQRankSum=6.532;DP=226;ExcessHet=3.0103;FS=5.810;MLEAC=1;MLEAF=0.500;MQ=60.00;MQRankSum=0.000;QD=20.03;ReadPosRankSum=-0.859;SOR=0.420	GT:AD:DP:GQ:PL	0/1:78,148:226:99:4535,0,1790	4	7.37087	7.28117	0.942686	4.63356	4.52643	0
d225003	Ib	OtopLa	FBgn0259994	-1	X:5631035	1	X	5631035	T	C	AG	TRUE	36	1561.03	AC=2;AF=1.00;AN=2;DP=36;ExcessHet=3.0103;FS=0.000;MLEAC=2;MLEAF=1.00;MQ=60.00;QD=28.05;SOR=1.209	GT:AD:DP:GQ:PL	1/1:0,36:36:99:1575,108,0	4	4.25873	3.80584	0.230532	0.129723	0.050683	0
d225003	Ib	OtopLa	FBgn0259994	-1	X:5631048	1	X	5631048	T	C	AG	TRUE	53	2202.03	AC=2;AF=1.00;AN=2;DP=53;ExcessHet=3.0103;FS=0.000;MLEAC=2;MLEAF=1.00;MQ=60.00;QD=28.91;SOR=1.077	GT:AD:DP:GQ:PL	1/1:0,53:53:99:2216,162,0	4	4.25873	3.80584	0.230532	0.129723	0.050683	0
d225003	Ib	Nrg	FBgn0264975	1	X:8553469	1	X	8553469	A	G	AG	TRUE	137	4600.03	AC=2;AF=1.00;AN=2;DP=137;ExcessHet=3.0103;FS=0.000;MLEAC=2;MLEAF=1.00;MQ=60.00;QD=33.82;SOR=2.338	GT:AD:DP:GQ:PL	1/1:0,136:136:99:4614,407,0	4	5.59291	5.71762	0.88586	2.05802	2.32538	0
d225005	Ib	IA-2	FBgn0031294	-1	2L:1010857	0.378049	2L	1010857	T	C	AG	TRUE	82	839.6	AC=1;AF=0.500;AN=2;BaseQRankSum=1.659;DP=82;ExcessHet=3.0103;FS=1.887;MLEAC=1;MLEAF=0.500;MQ=60.00;MQRankSum=0.000;QD=10.24;ReadPosRankSum=0.135;SOR=0.933	GT:AD:DP:GQ:PL	0/1:51,31:82:99:847,0,1390	4	6.54402	7.83614	2.09102e-08	0.302821	0.331543	4.20006
d225005	Ib	Pex19	FBgn0032407	1	2L:12094295	1	2L	12094295	A	G	AG	TRUE	63	2758.03	AC=2;AF=1.00;AN=2;DP=63;ExcessHet=3.0103;FS=0.000;MLEAC=2;MLEAF=1.00;MQ=60.00;QD=30.37;SOR=0.859	GT:AD:DP:GQ:PL	1/1:0,63:63:99:2772,190,0	4	5.52679	4.58011	0.198542	3.35329	3.35545	4.20006
d225005	Ib	ThrRS	FBgn0027081	1	2L:12106021	0.108108	2L	12106021	A	G	AG	TRUE	111	121.6	AC=1;AF=0.500;AN=2;BaseQRankSum=5.147;DP=111;ExcessHet=3.0103;FS=1.179;MLEAC=1;MLEAF=0.500;MQ=60.00;MQRankSum=0.000;QD=1.10;ReadPosRankSum=0.471;SOR=0.467	GT:AD:DP:GQ:PL	0/1:99,12:111:99:129,0,3013	4	5.11791	5.14664	0.914631	2.22626	2.05694	4.20006
d225005	Ib	Rab6	FBgn0015797	-1	2L:12107332	0.148936	2L	12107332	T	C	AG	TRUE	47	125.6	AC=1;AF=0.500;AN=2;BaseQRankSum=2.678;DP=47;ExcessHet=3.0103;FS=13.730;MLEAC=1;MLEAF=0.500;MQ=60.00;MQRankSum=0.000;QD=2.67;ReadPosRankSum=-2.668;SOR=0.481	GT:AD:DP:GQ:PL	0/1:40,7:47:99:133,0,1206	4	5.65149	5.3903	0.997475	2.97474	2.86663	4.20006
d225005	Ib	CG16974	FBgn0032479	-1	2L:13189312	0.615385	2L	13189312	T	C	AG	TRUE	156	2788.6	AC=1;AF=0.500;AN=2;BaseQRankSum=3.546;DP=156;ExcessHet=3.0103;FS=3.035;MLEAC=1;MLEAF=0.500;MQ=60.00;MQRankSum=0.000;QD=17.88;ReadPosRankSum=0.541;SOR=0.470	GT:AD:DP:GQ:PL	0/1:60,96:156:99:2796,0,1571	4	3.8107	3.63081	0.755289	1.61977	1.51626	4.20006
d225005	Ib	Smg5	FBgn0019890	-1	2L:13900038	0.709302	2L	13900038	T	C	AG	TRUE	174	3874.6	AC=1;AF=0.500;AN=2;BaseQRankSum=5.293;DP=174;ExcessHet=3.0103;FS=8.003;MLEAC=1;MLEAF=0.500;MQ=60.00;MQRankSum=0.000;QD=22.53;ReadPosRankSum=-1.078;SOR=0.293	GT:AD:DP:GQ:PL	0/1:50,122:172:99:3882,0,1220	4	2.63722	3.52701	0.00709555	2.46817	2.16913	4.20006
d225005	Ib	nAChRalpha5	FBgn0028875	1	2L:14089204	1	2L	14089204	A	G	AG	TRUE	172	7118.03	AC=2;AF=1.00;AN=2;DP=172;ExcessHet=3.0103;FS=0.000;MLEAC=2;MLEAF=1.00;MQ=60.00;QD=32.01;SOR=2.275	GT:AD:DP:GQ:PL	1/1:0,172:172:99:7132,519,0	4	2.17311	2.13145	0.632364	0.0571794	0.030452	4.20006
d225005	Ib	nAChRalpha5	FBgn0028875	1	2L:14089207	0.646409	2L	14089207	A	G	AG	TRUE	181	4756.6	AC=1;AF=0.500;AN=2;BaseQRankSum=7.858;DP=181;ExcessHet=3.0103;FS=6.522;MLEAC=1;MLEAF=0.500;MQ=60.00;MQRankSum=0.000;QD=26.28;ReadPosRankSum=-1.762;SOR=1.226	GT:AD:DP:GQ:PL	0/1:64,117:181:99:4764,0,2411	4	2.17311	2.13145	0.632364	0.0571794	0.030452	4.20006
d225005	Ib	nAChRalpha5	FBgn0028875	1	2L:14089236	0.608392	2L	14089236	A	G	AG	TRUE	143	2629.6	AC=1;AF=0.500;AN=2;BaseQRankSum=6.146;DP=143;ExcessHet=3.0103;FS=2.177;MLEAC=1;MLEAF=0.500;MQ=60.00;MQRankSum=0.000;QD=18.39;ReadPosRankSum=0.924;SOR=0.916	GT:AD:DP:GQ:PL	0/1:56,87:143:99:2637,0,1373	4	2.17311	2.13145	0.632364	0.0571794	0.030452	4.20006
d225005	Ib	nAChRalpha5	FBgn0028875	1	2L:14089246	1	2L	14089246	A	G	AG	TRUE	123	5114.03	AC=2;AF=1.00;AN=2;DP=123;ExcessHet=3.0103;FS=0.000;MLEAC=2;MLEAF=1.00;MQ=60.00;QD=27.79;SOR=1.004	GT:AD:DP:GQ:PL	1/1:0,123:123:99:5128,375,0	4	2.17311	2.13145	0.632364	0.0571794	0.030452	4.20006
d225005	Ib	chinmo	FBgn0086758	1	2L:1697095	0.762195	2L	1697095	A	G	AG	TRUE	164	3956.6	AC=1;AF=0.500;AN=2;BaseQRankSum=6.268;DP=164;ExcessHet=3.0103;FS=5.592;MLEAC=1;MLEAF=0.500;MQ=60.00;MQRankSum=0.000;QD=24.13;ReadPosRankSum=-1.215;SOR=0.372	GT:AD:DP:GQ:PL	0/1:39,125:164:99:3964,0,668	4	4.89124	3.28942	2.254e-05	2.01378	1.91915	4.20006
d225005	Ib	CG9662	FBgn0031529	-1	2L:3375848	1	2L	3375848	T	C	AG	TRUE	22	812.03	AC=2;AF=1.00;AN=2;DP=22;ExcessHet=3.0103;FS=0.000;MLEAC=2;MLEAF=1.00;MQ=60.00;QD=35.71;SOR=6.273	GT:AD:DP:GQ:PL	1/1:0,22:22:66:826,66,0	4	4.79971	4.26303	0.58721	2.25071	2.37554	4.20006
d225005	Ib	fipi	FBgn0031627	-1	2L:4735173	0.466077	2L	4735173	T	C	AG	TRUE	340	4596.6	AC=1;AF=0.500;AN=2;BaseQRankSum=6.676;DP=340;ExcessHet=3.0103;FS=1.785;MLEAC=1;MLEAF=0.500;MQ=60.00;MQRankSum=0.000;QD=13.56;ReadPosRankSum=-1.361;SOR=0.583	GT:AD:DP:GQ:PL	0/1:181,158:339:99:4604,0,5154	4	5.70931	5.32823	0.250204	0.307762	0.421432	4.20006
d225005	Ib	Msp300	FBgn0261836	1	2L:5164694	0.567568	2L	5164694	A	G	AG	TRUE	74	1232.6	AC=1;AF=0.500;AN=2;BaseQRankSum=3.641;DP=74;ExcessHet=3.0103;FS=3.290;MLEAC=1;MLEAF=0.500;MQ=60.00;MQRankSum=0.000;QD=16.66;ReadPosRankSum=0.823;SOR=1.203	GT:AD:DP:GQ:PL	0/1:32,42:74:99:1240,0,775	4	5.66863	5.5634	0.880478	3.31906	3.19027	4.20006
d225005	Ib	nrv2	FBgn0015777	-1	2L:6789976	1	2L	6789976	T	C	AG	TRUE	59	2188.03	AC=2;AF=1.00;AN=2;DP=59;ExcessHet=3.0103;FS=0.000;MLEAC=2;MLEAF=1.00;MQ=60.00;QD=25.30;SOR=3.538	GT:AD:DP:GQ:PL	1/1:0,59:59:99:2202,177,0	4	3.48474	2.11119	0.017969	1.38147	1.80436	4.20006
d225005	Ib	nAChRalpha6	FBgn0032151	-1	2L:9809349	1	2L	9809349	T	C	AG	TRUE	14	429.03	AC=2;AF=1.00;AN=2;DP=14;ExcessHet=3.0103;FS=0.000;MLEAC=2;MLEAF=1.00;MQ=60.00;QD=30.64;SOR=1.765	GT:AD:DP:GQ:PL	1/1:0,14:14:41:443,41,0	4	4.50738	3.70086	0.0554371	0.126891	0.109016	4.20006
d225005	Ib	SLO2	FBgn0261698	-1	2R:10323545	1	2R	10323545	T	C	AG	TRUE	57	1990.03	AC=2;AF=1.00;AN=2;DP=57;ExcessHet=3.0103;FS=0.000;MLEAC=2;MLEAF=1.00;MQ=60.00;QD=34.91;SOR=0.800	GT:AD:DP:GQ:PL	1/1:0,57:57:99:2004,171,0	4	1.85291	1.3384	0.537466	0.0168058	0.0566964	4.20006
d225005	Ib	RpS15Ab	FBgn0033555	1	2R:10822309	1	2R	10822309	A	G	AG	TRUE	24	754.03	AC=2;AF=1.00;AN=2;DP=24;ExcessHet=3.0103;FS=0.000;MLEAC=2;MLEAF=1.00;MQ=60.00;QD=31.42;SOR=6.439	GT:AD:DP:GQ:PL	1/1:0,24:24:70:768,70,0	4	3.76529	3.1313	0.134754	5.69163	5.75158	4.20006
d225005	Ib	nclb	FBgn0263510	1	2R:10876649	1	2R	10876649	A	G	AG	TRUE	32	1189.03	AC=2;AF=1.00;AN=2;DP=32;ExcessHet=3.0103;FS=0.000;MLEAC=2;MLEAF=1.00;MQ=60.00;QD=29.02;SOR=1.284	GT:AD:DP:GQ:PL	1/1:0,32:32:96:1203,96,0	4	2.63709	1.58521	0.250542	0.492658	0.759112	4.20006
d225005	Ib	NAT1	FBgn0010488	1	2R:12921246	0.341176	2R	12921246	A	G	AG	TRUE	85	715.6	AC=1;AF=0.500;AN=2;BaseQRankSum=1.293;DP=85;ExcessHet=3.0103;FS=24.326;MLEAC=1;MLEAF=0.500;MQ=60.00;MQRankSum=0.000;QD=8.42;ReadPosRankSum=1.344;SOR=3.069	GT:AD:DP:GQ:PL	0/1:56,29:85:99:723,0,1572	4	4.55701	5.52808	0.00301008	4.16676	3.64409	4.20006
d225005	Ib	CG6329	FBgn0033872	1	2R:13832057	0.624277	2R	13832057	A	G	AG	TRUE	173	4273.6	AC=1;AF=0.500;AN=2;BaseQRankSum=1.390;DP=173;ExcessHet=3.0103;FS=4.595;MLEAC=1;MLEAF=0.500;MQ=60.00;MQRankSum=0.000;QD=24.70;ReadPosRankSum=-1.225;SOR=0.643	GT:AD:DP:GQ:PL	0/1:65,108:173:99:4281,0,2617	4	6.30782	5.19838	0.0246684	0.326178	0.229277	4.20006
d225005	Ib	CG6329	FBgn0033872	1	2R:13832539	0.773333	2R	13832539	A	G	AG	TRUE	150	3872.6	AC=1;AF=0.500;AN=2;BaseQRankSum=7.295;DP=150;ExcessHet=3.0103;FS=1.565;MLEAC=1;MLEAF=0.500;MQ=60.00;MQRankSum=0.000;QD=25.82;ReadPosRankSum=0.117;SOR=0.522	GT:AD:DP:GQ:PL	0/1:34,116:150:99:3880,0,733	4	6.30782	5.19838	0.0246684	0.326178	0.229277	4.20006
d225005	Ib	Rpn6	FBgn0028689	-1	2R:14751349	0.70229	2R	14751349	T	C	AG	TRUE	131	3533.6	AC=1;AF=0.500;AN=2;BaseQRankSum=1.026;DP=131;ExcessHet=3.0103;FS=4.697;MLEAC=1;MLEAF=0.500;MQ=60.00;MQRankSum=0.000;QD=26.97;ReadPosRankSum=-0.371;SOR=0.882	GT:AD:DP:GQ:PL	0/1:39,92:131:99:3541,0,1295	4	5.22049	6.17786	0.412321	5.26645	4.73751	4.20006
d225005	Ib	tun	FBgn0034046	1	2R:15849299	1	2R	15849299	A	G	AG	TRUE	70	2492.03	AC=2;AF=1.00;AN=2;DP=70;ExcessHet=3.0103;FS=0.000;MLEAC=2;MLEAF=1.00;MQ=60.00;QD=32.24;SOR=1.418	GT:AD:DP:GQ:PL	1/1:0,70:70:99:2506,210,0	4	2.16697	3.40061	0.15337	0.768101	0.80403	4.20006
d225005	Ib	CG30116	FBgn0028496	-1	2R:18457250	0.190476	2R	18457250	T	C	AG	TRUE	21	78.6	AC=1;AF=0.500;AN=2;BaseQRankSum=0.232;DP=21;ExcessHet=3.0103;FS=5.972;MLEAC=1;MLEAF=0.500;MQ=60.00;MQRankSum=0.000;QD=3.74;ReadPosRankSum=2.326;SOR=1.438	GT:AD:DP:GQ:PL	0/1:17,4:21:86:86,0,480	4	2.05783	0.888285	0.000330328	0.132941	0.0831169	4.20006
d225005	Ib	CG13506	FBgn0034723	1	2R:22391510	0.833333	2R	22391510	A	G	AG	TRUE	36	1016.6	AC=1;AF=0.500;AN=2;BaseQRankSum=3.057;DP=36;ExcessHet=3.0103;FS=4.274;MLEAC=1;MLEAF=0.500;MQ=60.00;MQRankSum=0.000;QD=28.24;ReadPosRankSum=-0.980;SOR=0.915	GT:AD:DP:GQ:PL	0/1:6,30:36:99:1024,0,101	4	4.13675	4.31975	0.246252	0.498164	0.623232	4.20006
d225005	Ib	Vha16-1	FBgn0262736	-1	2R:6626171	0.209459	2R	6626171	T	C	AG	TRUE	592	2797.6	AC=1;AF=0.500;AN=2;BaseQRankSum=8.908;DP=592;ExcessHet=3.0103;FS=19.005;MLEAC=1;MLEAF=0.500;MQ=60.00;MQRankSum=0.000;QD=4.73;ReadPosRankSum=-1.257;SOR=1.952	GT:AD:DP:GQ:PL	0/1:468,124:592:99:2805,0,13880	4	8.42356	8.78145	0.297901	6.11325	6.08202	4.20006
d225005	Ib	puml	FBgn0033226	1	2R:7813863	1	2R	7813863	A	G	AG	TRUE	87	3145.03	AC=2;AF=1.00;AN=2;DP=87;ExcessHet=3.0103;FS=0.000;MLEAC=2;MLEAF=1.00;MQ=60.00;QD=34.06;SOR=0.763	GT:AD:DP:GQ:PL	1/1:0,87:87:99:3159,261,0	4	2.96619	2.88029	0.815089	2.94272	2.98054	4.20006
d225005	Ib	CG14764	FBgn0033236	-1	2R:7954006	1	2R	7954006	T	C	AG	TRUE	16	527.03	AC=2;AF=1.00;AN=2;DP=16;ExcessHet=3.0103;FS=0.000;MLEAC=2;MLEAF=1.00;MQ=60.00;QD=32.94;SOR=1.244	GT:AD:DP:GQ:PL	1/1:0,16:16:48:541,48,0	4	3.63595	4.28822	0.22193	0.652756	0.775469	4.20006
d225005	Ib	CSN4	FBgn0027054	1	2R:7973697	0.456522	2R	7973697	A	G	AG	TRUE	92	1223.6	AC=1;AF=0.500;AN=2;BaseQRankSum=2.188;DP=92;ExcessHet=3.0103;FS=5.394;MLEAC=1;MLEAF=0.500;MQ=60.00;MQRankSum=0.000;QD=13.30;ReadPosRankSum=0.229;SOR=1.244	GT:AD:DP:GQ:PL	0/1:50,42:92:99:1231,0,1492	4	2.71701	2.92813	0.927838	3.57475	3.3122	4.20006
d225005	Ib	Lpin	FBgn0263593	-1	2R:8143056	1	2R	8143056	T	C	AG	TRUE	162	5747.03	AC=2;AF=1.00;AN=2;DP=162;ExcessHet=3.0103;FS=0.000;MLEAC=2;MLEAF=1.00;MQ=60.00;QD=33.35;SOR=1.200	GT:AD:DP:GQ:PL	1/1:0,162:162:99:5761,485,0	4	4.39667	5.07773	0.241101	2.14187	1.82211	4.20006
d225005	Ib	Uba1	FBgn0023143	-1	2R:9688858	0.618474	2R	9688858	T	C	AG	TRUE	249	5168.6	AC=1;AF=0.500;AN=2;BaseQRankSum=9.641;DP=249;ExcessHet=3.0103;FS=6.209;MLEAC=1;MLEAF=0.500;MQ=60.00;MQRankSum=0.000;QD=20.76;ReadPosRankSum=-1.016;SOR=1.058	GT:AD:DP:GQ:PL	0/1:95,154:249:99:5176,0,1878	4	4.58023	4.88416	0.433921	3.14724	3.06775	4.20006
d225005	Ib	Uba1	FBgn0023143	-1	2R:9689431	0.98913	2R	9689431	T	C	AG	TRUE	92	3199.03	AC=2;AF=1.00;AN=2;BaseQRankSum=1.249;DP=92;ExcessHet=3.0103;FS=3.405;MLEAC=2;MLEAF=1.00;MQ=60.00;MQRankSum=0.000;QD=34.77;ReadPosRankSum=0.151;SOR=0.545	GT:AD:DP:GQ:PL	1/1:1,91:92:99:3213,239,0	4	4.58023	4.88416	0.433921	3.14724	3.06775	4.20006
d225005	Ib	Pka-R2	FBgn0022382	-1	2R:9994533	0.822785	2R	9994533	T	C	AG	TRUE	79	2079.6	AC=1;AF=0.500;AN=2;BaseQRankSum=-0.061;DP=79;ExcessHet=3.0103;FS=0.000;MLEAC=1;MLEAF=0.500;MQ=60.00;MQRankSum=0.000;QD=26.32;ReadPosRankSum=0.541;SOR=0.614	GT:AD:DP:GQ:PL	0/1:14,65:79:99:2087,0,275	4	4.61114	4.8641	0.950267	2.30218	2.12679	4.20006
d225005	Ib	Cnep1r2	FBgn0036090	1	3L:10639369	1	3L	10639369	A	G	AG	TRUE	11	351.02	AC=2;AF=1.00;AN=2;DP=11;ExcessHet=3.0103;FS=0.000;MLEAC=2;MLEAF=1.00;MQ=60.00;QD=31.91;SOR=3.442	GT:AD:DP:GQ:PL	1/1:0,11:11:33:365,33,0	4	2.92145	3.38972	0.84709	2.63538	2.59013	4.20006
d225005	Ib	Csp	FBgn0004179	1	3L:22273143	0.256	3L	22273143	A	G	AG	TRUE	125	841.6	AC=1;AF=0.500;AN=2;BaseQRankSum=7.775;DP=125;ExcessHet=3.0103;FS=3.027;MLEAC=1;MLEAF=0.500;MQ=60.00;MQRankSum=0.000;QD=6.73;ReadPosRankSum=0.739;SOR=0.390	GT:AD:DP:GQ:PL	0/1:93,32:125:99:849,0,2774	4	5.56152	5.5577	0.972817	1.72477	1.54634	4.20006
d225005	Ib	Shab	FBgn0262593	1	3L:2925255	1	3L	2925255	A	G	AG	TRUE	41	1445.03	AC=2;AF=1.00;AN=2;DP=41;ExcessHet=3.0103;FS=0.000;MLEAC=2;MLEAF=1.00;MQ=60.00;QD=30.85;SOR=1.206	GT:AD:DP:GQ:PL	1/1:0,41:41:99:1459,122,0	4	3.60169	2.82872	0.0568977	0.796233	0.656306	4.20006
d225005	Ib	Shab	FBgn0262593	1	3L:2941132	0.537634	3L	2941132	A	G	AG	TRUE	186	2923.6	AC=1;AF=0.500;AN=2;BaseQRankSum=5.901;DP=186;ExcessHet=3.0103;FS=29.810;MLEAC=1;MLEAF=0.500;MQ=60.00;MQRankSum=0.000;QD=15.72;ReadPosRankSum=0.665;SOR=0.518	GT:AD:DP:GQ:PL	0/1:86,100:186:99:2931,0,2094	4	3.60169	2.82872	0.0568977	0.796233	0.656306	4.20006
d225005	Ib	Shab	FBgn0262593	1	3L:2941312	0.452381	3L	2941312	A	G	AG	TRUE	126	1750.6	AC=1;AF=0.500;AN=2;BaseQRankSum=7.571;DP=126;ExcessHet=3.0103;FS=0.000;MLEAC=1;MLEAF=0.500;MQ=60.00;MQRankSum=0.000;QD=13.89;ReadPosRankSum=-0.217;SOR=0.731	GT:AD:DP:GQ:PL	0/1:69,57:126:99:1758,0,1783	4	3.60169	2.82872	0.0568977	0.796233	0.656306	4.20006
d225005	Ib	Shab	FBgn0262593	1	3L:2941364	1	3L	2941364	A	G	AG	TRUE	215	7622.03	AC=2;AF=1.00;AN=2;DP=215;ExcessHet=3.0103;FS=0.000;MLEAC=2;MLEAF=1.00;MQ=60.00;QD=27.34;SOR=1.688	GT:AD:DP:GQ:PL	1/1:0,215:215:99:7636,644,0	4	3.60169	2.82872	0.0568977	0.796233	0.656306	4.20006
d225005	Ib	Shab	FBgn0262593	1	3L:2941426	1	3L	2941426	A	G	AG	TRUE	173	6114.03	AC=2;AF=1.00;AN=2;DP=173;ExcessHet=3.0103;FS=0.000;MLEAC=2;MLEAF=1.00;MQ=60.00;QD=31.24;SOR=2.400	GT:AD:DP:GQ:PL	1/1:0,173:173:99:6128,521,0	4	3.60169	2.82872	0.0568977	0.796233	0.656306	4.20006
d225005	Ib	Rdl	FBgn0004244	-1	3L:9155218	1	3L	9155218	T	C	AG	TRUE	118	5025.03	AC=2;AF=1.00;AN=2;DP=118;ExcessHet=3.0103;FS=0.000;MLEAC=2;MLEAF=1.00;MQ=60.00;QD=32.35;SOR=0.727	GT:AD:DP:GQ:PL	1/1:0,118:118:99:5039,358,0	4	6.00229	5.65752	0.165943	0.174173	0.0730245	4.20006
d225005	Ib	EndoA	FBgn0038659	1	3R:18907652	0.660377	3R	18907652	A	G	AG	TRUE	53	1109.6	AC=1;AF=0.500;AN=2;BaseQRankSum=2.517;DP=53;ExcessHet=3.0103;FS=1.190;MLEAC=1;MLEAF=0.500;MQ=60.00;MQRankSum=0.000;QD=20.94;ReadPosRankSum=-2.229;SOR=1.075	GT:AD:DP:GQ:PL	0/1:18,35:53:99:1117,0,442	4	4.7728	5.29408	0.154643	0.85352	0.843628	4.20006
d225005	Ib	EndoA	FBgn0038659	1	3R:18907675	0.294118	3R	18907675	A	G	AG	TRUE	51	390.6	AC=1;AF=0.500;AN=2;BaseQRankSum=4.527;DP=51;ExcessHet=3.0103;FS=2.682;MLEAC=1;MLEAF=0.500;MQ=60.00;MQRankSum=0.000;QD=7.66;ReadPosRankSum=0.186;SOR=0.358	GT:AD:DP:GQ:PL	0/1:36,15:51:99:398,0,1063	4	4.7728	5.29408	0.154643	0.85352	0.843628	4.20006
d225005	Ib	Xrp1	FBgn0261113	1	3R:18918354	0.195876	3R	18918354	A	G	AG	TRUE	97	360.6	AC=1;AF=0.500;AN=2;BaseQRankSum=1.582;DP=97;ExcessHet=3.0103;FS=1.041;MLEAC=1;MLEAF=0.500;MQ=60.00;MQRankSum=0.000;QD=3.72;ReadPosRankSum=-0.904;SOR=0.478	GT:AD:DP:GQ:PL	0/1:78,19:97:99:368,0,2248	4	6.93525	6.63308	0.99582	5.49922	5.49918	4.20006
d225005	Ib	vib	FBgn0267975	-1	3R:19226523	0.37	3R	19226523	T	C	AG	TRUE	103	869.6	AC=1;AF=0.500;AN=2;BaseQRankSum=1.921;DP=103;ExcessHet=3.0103;FS=1.743;MLEAC=1;MLEAF=0.500;MQ=60.00;MQRankSum=0.000;QD=8.70;ReadPosRankSum=-0.337;SOR=0.513	GT:AD:DP:GQ:PL	0/1:63,37:100:99:877,0,1692	4	5.02601	5.14846	0.946513	3.41525	3.2449	4.20006
d225005	Ib	ATPsynCF6	FBgn0016119	-1	3R:23355357	0.838828	3R	23355357	T	C	AG	TRUE	274	7126.6	AC=1;AF=0.500;AN=2;BaseQRankSum=4.956;DP=274;ExcessHet=3.0103;FS=1.353;MLEAC=1;MLEAF=0.500;MQ=60.00;MQRankSum=0.000;QD=26.10;ReadPosRankSum=-0.846;SOR=0.589	GT:AD:DP:GQ:PL	0/1:44,229:273:99:7134,0,661	4	9.01907	8.99728	0.563116	8.34196	8.52202	4.20006
d225005	Ib	Gdh	FBgn0001098	-1	3R:23936205	0.391892	3R	23936205	T	C	AG	TRUE	148	1670.6	AC=1;AF=0.500;AN=2;BaseQRankSum=8.189;DP=148;ExcessHet=3.0103;FS=0.000;MLEAC=1;MLEAF=0.500;MQ=60.00;MQRankSum=0.000;QD=11.29;ReadPosRankSum=0.905;SOR=0.684	GT:AD:DP:GQ:PL	0/1:90,58:148:99:1678,0,2398	4	6.73636	5.26871	0.00814535	4.37474	4.57326	4.20006
d225005	Ib	Sec10	FBgn0266673	1	3R:24137107	1	3R	24137107	A	G	AG	TRUE	81	3078.03	AC=2;AF=1.00;AN=2;DP=81;ExcessHet=3.0103;FS=0.000;MLEAC=2;MLEAF=1.00;MQ=60.00;QD=26.83;SOR=1.264	GT:AD:DP:GQ:PL	1/1:0,81:81:99:3092,244,0	4	1.26464	1.79158	0.698029	0.62732	0.751224	4.20006
d225005	Ib	Ald1	FBgn0000064	-1	3R:26254245	0.374312	3R	26254245	T	C	AG	TRUE	547	5654.6	AC=1;AF=0.500;AN=2;BaseQRankSum=8.869;DP=547;ExcessHet=3.0103;FS=5.741;MLEAC=1;MLEAF=0.500;MQ=60.00;MQRankSum=0.000;QD=10.38;ReadPosRankSum=-0.041;SOR=1.139	GT:AD:DP:GQ:PL	0/1:341,204:545:99:5662,0,9738	4	11.4026	10.0568	0.0414265	10.8637	11.1339	4.20006
d225005	Ib	Ald1	FBgn0000064	-1	3R:26254381	0.415452	3R	26254381	T	C	AG	TRUE	686	8300.6	AC=1;AF=0.500;AN=2;BaseQRankSum=13.095;DP=686;ExcessHet=3.0103;FS=2.512;MLEAC=1;MLEAF=0.500;MQ=60.00;MQRankSum=0.000;QD=12.10;ReadPosRankSum=-0.242;SOR=0.520	GT:AD:DP:GQ:PL	0/1:401,285:686:99:8308,0,11504	4	11.4026	10.0568	0.0414265	10.8637	11.1339	4.20006
d225005	Ib	betaTub97EF	FBgn0003890	-1	3R:27967290	1	3R	27967290	T	C	AG	TRUE	21	931.03	AC=2;AF=1.00;AN=2;DP=21;ExcessHet=3.0103;FS=0.000;MLEAC=2;MLEAF=1.00;MQ=60.00;QD=29.22;SOR=0.990	GT:AD:DP:GQ:PL	1/1:0,21:21:63:945,63,0	4	0.831406	0.24625	8.04814e-05	1.51149	1.698	4.20006
d225005	Ib	betaTub97EF	FBgn0003890	-1	3R:27967292	1	3R	27967292	T	C	AG	TRUE	21	931.03	AC=2;AF=1.00;AN=2;DP=21;ExcessHet=3.0103;FS=0.000;MLEAC=2;MLEAF=1.00;MQ=60.00;QD=33.10;SOR=0.990	GT:AD:DP:GQ:PL	1/1:0,21:21:63:945,63,0	4	0.831406	0.24625	8.04814e-05	1.51149	1.698	4.20006
d225005	Ib	cpx	FBgn0041605	1	3R:4297504	0.429907	3R	4297504	A	G	AG	TRUE	107	1274.6	AC=1;AF=0.500;AN=2;BaseQRankSum=3.894;DP=107;ExcessHet=3.0103;FS=1.199;MLEAC=1;MLEAF=0.500;MQ=60.00;MQRankSum=0.000;QD=11.91;ReadPosRankSum=-0.357;SOR=0.429	GT:AD:DP:GQ:PL	0/1:61,46:107:99:1282,0,1867	4	7.90852	7.29727	0.637321	0.177459	0.228242	4.20006
d225005	Ib	cpx	FBgn0041605	1	3R:4301200	0.490421	3R	4301200	A	G	AG	TRUE	265	3495.6	AC=1;AF=0.500;AN=2;BaseQRankSum=7.582;DP=265;ExcessHet=3.0103;FS=0.962;MLEAC=1;MLEAF=0.500;MQ=60.00;MQRankSum=0.000;QD=13.39;ReadPosRankSum=0.370;SOR=0.789	GT:AD:DP:GQ:PL	0/1:133,128:261:99:3503,0,5411	4	7.90852	7.29727	0.637321	0.177459	0.228242	4.20006
d225005	Ib	cpx	FBgn0041605	1	3R:4301212	0.277778	3R	4301212	A	G	AG	TRUE	270	1835.6	AC=1;AF=0.500;AN=2;BaseQRankSum=7.968;DP=270;ExcessHet=3.0103;FS=16.932;MLEAC=1;MLEAF=0.500;MQ=60.00;MQRankSum=0.000;QD=6.80;ReadPosRankSum=-0.159;SOR=0.919	GT:AD:DP:GQ:PL	0/1:195,75:270:99:1843,0,7958	4	7.90852	7.29727	0.637321	0.177459	0.228242	4.20006
d225005	Ib	beag	FBgn0037660	-1	3R:9063537	0.454545	3R	9063537	T	C	AG	TRUE	121	2047.6	AC=1;AF=0.500;AN=2;BaseQRankSum=-4.247;DP=121;ExcessHet=3.0103;FS=107.783;MLEAC=1;MLEAF=0.500;MQ=60.00;MQRankSum=0.000;QD=16.92;ReadPosRankSum=-7.137;SOR=5.170	GT:AD:DP:GQ:PL	0/1:66,55:121:99:2055,0,2732	4	1.54635	1.3782	0.945538	1.39988	1.21946	4.20006
d225005	Ib	cac	FBgn0263111	-1	X:11971853	1	X	11971853	T	C	AG	TRUE	57	1904.03	AC=2;AF=1.00;AN=2;DP=57;ExcessHet=3.0103;FS=0.000;MLEAC=2;MLEAF=1.00;MQ=60.00;QD=33.40;SOR=0.728	GT:AD:DP:GQ:PL	1/1:0,57:57:99:1918,170,0	4	4.16093	4.30898	0.905929	0.0597302	0.0545455	4.20006
d225005	Ib	ND-B18	FBgn0030605	1	X:15064404	0.780488	X	15064404	A	G	AG	TRUE	248	6507.6	AC=1;AF=0.500;AN=2;BaseQRankSum=9.067;DP=248;ExcessHet=3.0103;FS=1.716;MLEAC=1;MLEAF=0.500;MQ=60.00;MQRankSum=0.000;QD=26.45;ReadPosRankSum=-0.197;SOR=0.508	GT:AD:DP:GQ:PL	0/1:54,192:246:99:6515,0,924	4	7.59932	6.95118	0.954122	6.45447	6.60477	4.20006
d225005	Ib	Cox17	FBgn0030610	-1	X:15084514	0.487288	X	15084514	T	C	AG	TRUE	236	3219.6	AC=1;AF=0.500;AN=2;BaseQRankSum=0.176;DP=236;ExcessHet=3.0103;FS=25.952;MLEAC=1;MLEAF=0.500;MQ=60.00;MQRankSum=0.000;QD=13.64;ReadPosRankSum=-4.585;SOR=0.146	GT:AD:DP:GQ:PL	0/1:121,115:236:99:3227,0,3909	4	5.69641	5.54231	0.382314	4.48811	4.0839	4.20006
d225005	Ib	Sh	FBgn0003380	-1	X:17926624	0.346939	X	17926624	T	C	AG	TRUE	49	457.6	AC=1;AF=0.500;AN=2;BaseQRankSum=2.977;DP=49;ExcessHet=3.0103;FS=2.587;MLEAC=1;MLEAF=0.500;MQ=60.00;MQRankSum=0.000;QD=9.34;ReadPosRankSum=-2.214;SOR=0.986	GT:AD:DP:GQ:PL	0/1:32,17:49:99:465,0,932	4	5.78478	5.98037	0.885151	2.25586	1.88036	4.20006
d225005	Ib	nAChRalpha7	FBgn0086778	-1	X:19334465	1	X	19334465	T	C	AG	TRUE	104	3678.03	AC=2;AF=1.00;AN=2;DP=104;ExcessHet=3.0103;FS=0.000;MLEAC=2;MLEAF=1.00;MQ=60.00;QD=27.78;SOR=2.746	GT:AD:DP:GQ:PL	1/1:0,104:104:99:3692,313,0	4	2.15632	1.80221	0.656062	0.122835	0.0481346	4.20006
d225005	Ib	DIP1	FBgn0024807	-1	X:21629725	0.265625	X	21629725	T	C	AG	TRUE	64	430.6	AC=1;AF=0.500;AN=2;BaseQRankSum=3.400;DP=64;ExcessHet=3.0103;FS=5.884;MLEAC=1;MLEAF=0.500;MQ=60.00;MQRankSum=0.000;QD=6.73;ReadPosRankSum=1.128;SOR=0.861	GT:AD:DP:GQ:PL	0/1:47,17:64:99:438,0,1297	4	4.22571	4.66995	0.917906	1.90808	1.68313	4.20006
d225005	Ib	Vap33	FBgn0029687	1	X:3953264	0.46	X	3953264	A	G	AG	TRUE	200	2809.6	AC=1;AF=0.500;AN=2;BaseQRankSum=9.247;DP=200;ExcessHet=3.0103;FS=1.830;MLEAC=1;MLEAF=0.500;MQ=60.00;MQRankSum=0.000;QD=14.05;ReadPosRankSum=0.021;SOR=0.548	GT:AD:DP:GQ:PL	0/1:108,92:200:99:2817,0,3083	4	6.63427	6.82411	0.460294	4.36447	3.97039	4.20006
d225005	Ib	ctp	FBgn0011760	1	X:4699254	0.208054	X	4699254	A	G	AG	TRUE	149	731.6	AC=1;AF=0.500;AN=2;BaseQRankSum=7.012;DP=149;ExcessHet=3.0103;FS=7.626;MLEAC=1;MLEAF=0.500;MQ=60.00;MQRankSum=0.000;QD=4.91;ReadPosRankSum=-0.434;SOR=1.552	GT:AD:DP:GQ:PL	0/1:118,31:149:99:739,0,3324	4	7.37087	7.28117	0.942686	4.63356	4.52643	4.20006
d225005	Ib	sdt	FBgn0261873	1	X:8240090	1	X	8240090	A	G	AG	TRUE	54	1829.03	AC=2;AF=1.00;AN=2;DP=54;ExcessHet=3.0103;FS=0.000;MLEAC=2;MLEAF=1.00;MQ=60.00;QD=33.87;SOR=0.693	GT:AD:DP:GQ:PL	1/1:0,54:54:99:1843,161,0	4	3.2011	3.62824	0.393265	0.562036	0.832706	4.20006
d225005	Ib	Nrg	FBgn0264975	1	X:8553469	0.535294	X	8553469	A	G	AG	TRUE	170	2725.6	AC=1;AF=0.500;AN=2;BaseQRankSum=0.067;DP=170;ExcessHet=3.0103;FS=14.624;MLEAC=1;MLEAF=0.500;MQ=60.00;MQRankSum=0.000;QD=16.03;ReadPosRankSum=2.312;SOR=0.188	GT:AD:DP:GQ:PL	0/1:79,91:170:99:2733,0,2037	4	5.59291	5.71762	0.88586	2.05802	2.32538	4.20006
d225006	Ib	IA-2	FBgn0031294	-1	2L:1010857	0.297619	2L	1010857	T	C	AG	TRUE	84	607.6	AC=1;AF=0.500;AN=2;BaseQRankSum=2.323;DP=84;ExcessHet=3.0103;FS=8.081;MLEAC=1;MLEAF=0.500;MQ=60.00;MQRankSum=0.000;QD=7.23;ReadPosRankSum=-0.334;SOR=1.284	GT:AD:DP:GQ:PL	0/1:59,25:84:99:615,0,1706	4	6.54402	7.83614	2.09102e-08	0.302821	0.331543	0.333424
d225006	Ib	CG33303	FBgn0053303	-1	2L:10374727	0.818182	2L	10374727	T	C	AG	TRUE	55	1495.6	AC=1;AF=0.500;AN=2;BaseQRankSum=2.239;DP=55;ExcessHet=3.0103;FS=3.195;MLEAC=1;MLEAF=0.500;MQ=60.00;MQRankSum=0.000;QD=27.19;ReadPosRankSum=-0.701;SOR=1.344	GT:AD:DP:GQ:PL	0/1:10,45:55:99:1503,0,188	4	4.82255	3.93282	0.505552	2.43097	2.84372	0.333424
d225006	Ib	CG33303	FBgn0053303	-1	2L:10374859	0.928571	2L	10374859	T	C	AG	TRUE	42	1291.02	AC=2;AF=1.00;AN=2;BaseQRankSum=2.603;DP=42;ExcessHet=3.0103;FS=2.462;MLEAC=2;MLEAF=1.00;MQ=60.00;MQRankSum=0.000;QD=30.74;ReadPosRankSum=-0.295;SOR=0.891	GT:AD:DP:GQ:PL	1/1:3,39:42:35:1305,35,0	4	4.82255	3.93282	0.505552	2.43097	2.84372	0.333424
d225006	Ib	CG31705	FBgn0028490	-1	2L:11523838	0.58	2L	11523838	T	C	AG	TRUE	50	919.6	AC=1;AF=0.500;AN=2;BaseQRankSum=4.556;DP=50;ExcessHet=3.0103;FS=10.296;MLEAC=1;MLEAF=0.500;MQ=60.00;MQRankSum=0.000;QD=18.39;ReadPosRankSum=-0.069;SOR=0.789	GT:AD:DP:GQ:PL	0/1:21,29:50:99:927,0,463	4	4.03693	4.29753	0.767202	4.24038	4.53465	0.333424
d225006	Ib	CG31705	FBgn0028490	-1	2L:11525232	0.515152	2L	11525232	T	C	AG	TRUE	33	555.6	AC=1;AF=0.500;AN=2;BaseQRankSum=2.183;DP=33;ExcessHet=3.0103;FS=0.000;MLEAC=1;MLEAF=0.500;MQ=60.00;MQRankSum=0.000;QD=16.84;ReadPosRankSum=0.563;SOR=0.551	GT:AD:DP:GQ:PL	0/1:16,17:33:99:563,0,481	4	4.03693	4.29753	0.767202	4.24038	4.53465	0.333424
d225006	Ib	Pex19	FBgn0032407	1	2L:12094295	0.554839	2L	12094295	A	G	AG	TRUE	155	2621.6	AC=1;AF=0.500;AN=2;BaseQRankSum=6.285;DP=155;ExcessHet=3.0103;FS=7.282;MLEAC=1;MLEAF=0.500;MQ=60.00;MQRankSum=0.000;QD=16.91;ReadPosRankSum=-0.478;SOR=1.267	GT:AD:DP:GQ:PL	0/1:69,86:155:99:2629,0,1832	4	5.52679	4.58011	0.198542	3.35329	3.35545	0.333424
d225006	Ib	ThrRS	FBgn0027081	1	2L:12106021	0.309091	2L	12106021	A	G	AG	TRUE	55	394.6	AC=1;AF=0.500;AN=2;BaseQRankSum=2.297;DP=55;ExcessHet=3.0103;FS=1.142;MLEAC=1;MLEAF=0.500;MQ=60.00;MQRankSum=0.000;QD=7.17;ReadPosRankSum=-0.055;SOR=0.958	GT:AD:DP:GQ:PL	0/1:38,17:55:99:402,0,1034	4	5.11791	5.14664	0.914631	2.22626	2.05694	0.333424
d225006	Ib	CG16974	FBgn0032479	-1	2L:13189312	0.5	2L	13189312	T	C	AG	TRUE	24	372.6	AC=1;AF=0.500;AN=2;BaseQRankSum=3.461;DP=24;ExcessHet=3.0103;FS=0.000;MLEAC=1;MLEAF=0.500;MQ=60.00;MQRankSum=0.000;QD=15.53;ReadPosRankSum=-0.897;SOR=0.446	GT:AD:DP:GQ:PL	0/1:12,12:24:99:380,0,350	4	3.8107	3.63081	0.755289	1.61977	1.51626	0.333424
d225006	Ib	Snx21	FBgn0031457	-1	2L:2764371	0.4375	2L	2764371	T	C	AG	TRUE	32	517.6	AC=1;AF=0.500;AN=2;BaseQRankSum=1.296;DP=32;ExcessHet=3.0103;FS=27.436;MLEAC=1;MLEAF=0.500;MQ=60.00;MQRankSum=0.000;QD=16.18;ReadPosRankSum=-2.459;SOR=5.421	GT:AD:DP:GQ:PL	0/1:18,14:32:99:525,0,823	4	3.71689	5.92923	0.00165457	2.46603	2.37167	0.333424
d225006	Ib	ND-B14.5B	FBgn0031505	-1	2L:3145125	0.692308	2L	3145125	T	C	AG	TRUE	39	941.6	AC=1;AF=0.500;AN=2;BaseQRankSum=1.451;DP=39;ExcessHet=3.0103;FS=0.000;MLEAC=1;MLEAF=0.500;MQ=60.00;MQRankSum=0.000;QD=24.14;ReadPosRankSum=-0.094;SOR=0.732	GT:AD:DP:GQ:PL	0/1:12,27:39:99:949,0,236	4	7.10814	6.50114	0.981134	7.02897	7.05689	0.333424
d225006	Ib	Snx1	FBgn0031534	1	2L:3451842	0.282051	2L	3451842	A	G	AG	TRUE	39	249.6	AC=1;AF=0.500;AN=2;BaseQRankSum=2.023;DP=39;ExcessHet=3.0103;FS=3.441;MLEAC=1;MLEAF=0.500;MQ=60.00;MQRankSum=0.000;QD=6.40;ReadPosRankSum=1.975;SOR=0.223	GT:AD:DP:GQ:PL	0/1:28,11:39:99:257,0,700	4	1.59001	2.6723	0.203485	1.66581	1.77491	0.333424
d225006	Ib	Thor	FBgn0261560	1	2L:3478627	0.573059	2L	3478627	A	G	AG	TRUE	881	16272.6	AC=1;AF=0.500;AN=2;BaseQRankSum=19.078;DP=881;ExcessHet=3.0103;FS=5.048;MLEAC=1;MLEAF=0.500;MQ=60.00;MQRankSum=0.000;QD=18.58;ReadPosRankSum=2.904;SOR=1.039	GT:AD:DP:GQ:PL	0/1:374,502:876:99:16280,0,8591	4	4.02038	3.58018	0.652908	11.318	10.933	0.333424
d225006	Ib	fipi	FBgn0031627	-1	2L:4735173	0.5	2L	4735173	T	C	AG	TRUE	12	153.6	AC=1;AF=0.500;AN=2;BaseQRankSum=0.972;DP=12;ExcessHet=3.0103;FS=0.000;MLEAC=1;MLEAF=0.500;MQ=60.00;MQRankSum=0.000;QD=12.80;ReadPosRankSum=0.619;SOR=0.307	GT:AD:DP:GQ:PL	0/1:6,6:12:99:161,0,171	4	5.70931	5.32823	0.250204	0.307762	0.421432	0.333424
d225006	Ib	CG31650	FBgn0031673	-1	2L:5042598	1	2L	5042598	T	C	AG	TRUE	12	459.02	AC=2;AF=1.00;AN=2;DP=12;ExcessHet=3.0103;FS=0.000;MLEAC=2;MLEAF=1.00;MQ=60.00;QD=27.94;SOR=2.670	GT:AD:DP:GQ:PL	1/1:0,12:12:36:473,36,0	4	4.95708	5.02313	0.952346	2.11362	1.73761	0.333424
d225006	Ib	nrv2	FBgn0015777	-1	2L:6789976	0.625	2L	6789976	T	C	AG	TRUE	32	641.6	AC=1;AF=0.500;AN=2;BaseQRankSum=3.762;DP=32;ExcessHet=3.0103;FS=0.000;MLEAC=1;MLEAF=0.500;MQ=60.00;MQRankSum=0.000;QD=20.05;ReadPosRankSum=-1.702;SOR=0.446	GT:AD:DP:GQ:PL	0/1:12,20:32:99:649,0,319	4	3.48474	2.11119	0.017969	1.38147	1.80436	0.333424
d225006	Ib	14-3-3zeta	FBgn0004907	1	2R:10108800	0.173913	2R	10108800	A	G	AG	TRUE	92	300.6	AC=1;AF=0.500;AN=2;BaseQRankSum=5.112;DP=92;ExcessHet=3.0103;FS=2.653;MLEAC=1;MLEAF=0.500;MQ=60.00;MQRankSum=0.000;QD=3.27;ReadPosRankSum=0.347;SOR=1.145	GT:AD:DP:GQ:PL	0/1:76,16:92:99:308,0,2332	4	10.0161	10.0638	0.920612	8.20641	7.91397	0.333424
d225006	Ib	14-3-3zeta	FBgn0004907	1	2R:10108801	0.107527	2R	10108801	A	G	AG	TRUE	93	95.6	AC=1;AF=0.500;AN=2;BaseQRankSum=3.847;DP=93;ExcessHet=3.0103;FS=1.426;MLEAC=1;MLEAF=0.500;MQ=60.00;MQRankSum=0.000;QD=1.03;ReadPosRankSum=0.831;SOR=0.941	GT:AD:DP:GQ:PL	0/1:83,10:93:99:103,0,2547	4	10.0161	10.0638	0.920612	8.20641	7.91397	0.333424
d225006	Ib	RNaseZ	FBgn0028426	-1	2R:10307375	1	2R	10307375	T	C	AG	TRUE	22	964.03	AC=2;AF=1.00;AN=2;DP=22;ExcessHet=3.0103;FS=0.000;MLEAC=2;MLEAF=1.00;MQ=60.00;QD=27.86;SOR=6.273	GT:AD:DP:GQ:PL	1/1:0,22:22:66:978,66,0	4	0.912224	0.704883	0.672113	0.569709	0.392617	0.333424
d225006	Ib	RpS15Ab	FBgn0033555	1	2R:10822309	0.161017	2R	10822309	A	G	AG	TRUE	118	307.6	AC=1;AF=0.500;AN=2;BaseQRankSum=3.575;DP=118;ExcessHet=3.0103;FS=120.070;MLEAC=1;MLEAF=0.500;MQ=60.00;MQRankSum=0.000;QD=2.61;ReadPosRankSum=-3.024;SOR=5.992	GT:AD:DP:GQ:PL	0/1:99,19:118:99:315,0,2705	4	3.76529	3.1313	0.134754	5.69163	5.75158	0.333424
d225006	Ib	nclb	FBgn0263510	1	2R:10876649	0.793103	2R	10876649	A	G	AG	TRUE	29	800.6	AC=1;AF=0.500;AN=2;BaseQRankSum=3.930;DP=29;ExcessHet=3.0103;FS=5.297;MLEAC=1;MLEAF=0.500;MQ=60.00;MQRankSum=0.000;QD=27.61;ReadPosRankSum=0.648;SOR=0.127	GT:AD:DP:GQ:PL	0/1:6,23:29:90:808,0,90	4	2.63709	1.58521	0.250542	0.492658	0.759112	0.333424
d225006	Ib	Drep3	FBgn0028407	1	2R:12062006	0.652174	2R	12062006	A	G	AG	TRUE	23	421.6	AC=1;AF=0.500;AN=2;BaseQRankSum=1.040;DP=23;ExcessHet=3.0103;FS=4.304;MLEAC=1;MLEAF=0.500;MQ=60.00;MQRankSum=0.000;QD=18.33;ReadPosRankSum=-0.065;SOR=1.911	GT:AD:DP:GQ:PL	0/1:8,15:23:99:429,0,182	4	3.12174	3.72334	0.5785	0.173035	0.00806535	0.333424
d225006	Ib	CG3955	FBgn0033793	-1	2R:13128147	0.6	2R	13128147	T	C	AG	TRUE	60	1122.6	AC=1;AF=0.500;AN=2;BaseQRankSum=4.182;DP=60;ExcessHet=3.0103;FS=2.263;MLEAC=1;MLEAF=0.500;MQ=60.00;MQRankSum=0.000;QD=18.71;ReadPosRankSum=-0.432;SOR=0.425	GT:AD:DP:GQ:PL	0/1:24,36:60:99:1130,0,586	4	4.54626	4.75042	0.982538	0.118374	0.14535	0.333424
d225006	Ib	bbc	FBgn0033844	-1	2R:13486995	0.642857	2R	13486995	T	C	AG	TRUE	14	258.6	AC=1;AF=0.500;AN=2;BaseQRankSum=-0.318;DP=14;ExcessHet=3.0103;FS=2.363;MLEAC=1;MLEAF=0.500;MQ=60.00;MQRankSum=0.000;QD=18.47;ReadPosRankSum=-0.580;SOR=1.288	GT:AD:DP:GQ:PL	0/1:5,9:14:99:266,0,140	4	2.43079	2.35712	0.725008	1.06293	1.18129	0.333424
d225006	Ib	bbc	FBgn0033844	-1	2R:13487558	0.142857	2R	13487558	T	C	AG	TRUE	42	83.6	AC=1;AF=0.500;AN=2;BaseQRankSum=2.621;DP=42;ExcessHet=3.0103;FS=3.975;MLEAC=1;MLEAF=0.500;MQ=60.00;MQRankSum=0.000;QD=1.99;ReadPosRankSum=-0.850;SOR=1.233	GT:AD:DP:GQ:PL	0/1:36,6:42:91:91,0,1078	4	2.43079	2.35712	0.725008	1.06293	1.18129	0.333424
d225006	Ib	CG6329	FBgn0033872	1	2R:13832539	0.388889	2R	13832539	A	G	AG	TRUE	54	561.6	AC=1;AF=0.500;AN=2;BaseQRankSum=2.948;DP=54;ExcessHet=3.0103;FS=1.088;MLEAC=1;MLEAF=0.500;MQ=60.00;MQRankSum=0.000;QD=10.40;ReadPosRankSum=1.471;SOR=0.999	GT:AD:DP:GQ:PL	0/1:33,21:54:99:569,0,980	4	6.30782	5.19838	0.0246684	0.326178	0.229277	0.333424
d225006	Ib	ReepB	FBgn0033906	1	2R:14172781	0.58216	2R	14172781	A	G	AG	TRUE	426	7488.6	AC=1;AF=0.500;AN=2;BaseQRankSum=9.676;DP=426;ExcessHet=3.0103;FS=0.695;MLEAC=1;MLEAF=0.500;MQ=60.00;MQRankSum=0.000;QD=17.58;ReadPosRankSum=-2.329;SOR=0.603	GT:AD:DP:GQ:PL	0/1:178,248:426:99:7496,0,4639	4	8.82339	8.47452	0.973655	7.40431	7.35215	0.333424
d225006	Ib	ReepB	FBgn0033906	1	2R:14172820	0.593496	2R	14172820	A	G	AG	TRUE	369	6998.6	AC=1;AF=0.500;AN=2;BaseQRankSum=11.514;DP=369;ExcessHet=3.0103;FS=8.645;MLEAC=1;MLEAF=0.500;MQ=60.00;MQRankSum=0.000;QD=18.97;ReadPosRankSum=1.464;SOR=0.331	GT:AD:DP:GQ:PL	0/1:150,219:369:99:7006,0,3400	4	8.82339	8.47452	0.973655	7.40431	7.35215	0.333424
d225006	Ib	Opa1	FBgn0261276	-1	2R:14234798	0.846154	2R	14234798	T	C	AG	TRUE	26	689.63	AC=1;AF=0.500;AN=2;BaseQRankSum=2.266;DP=26;ExcessHet=3.0103;FS=5.579;MLEAC=1;MLEAF=0.500;MQ=60.00;MQRankSum=0.000;QD=26.52;ReadPosRankSum=-0.434;SOR=0.105	GT:AD:DP:GQ:PL	0/1:4,22:26:12:697,0,12	4	2.40495	3.13511	0.394098	1.90917	1.64868	0.333424
d225006	Ib	Gmppa	FBgn0034035	-1	2R:15677332	1	2R	15677332	T	C	AG	TRUE	30	1072.03	AC=2;AF=1.00;AN=2;DP=30;ExcessHet=3.0103;FS=0.000;MLEAC=2;MLEAF=1.00;MQ=60.00;QD=30.43;SOR=2.621	GT:AD:DP:GQ:PL	1/1:0,30:30:90:1086,90,0	4	2.13825	1.80404	0.769491	1.54195	1.7944	0.333424
d225006	Ib	Diap2	FBgn0015247	-1	2R:15932293	0.425532	2R	15932293	T	C	AG	TRUE	47	732.6	AC=1;AF=0.500;AN=2;BaseQRankSum=-3.778;DP=47;ExcessHet=3.0103;FS=25.615;MLEAC=1;MLEAF=0.500;MQ=60.00;MQRankSum=0.000;QD=15.59;ReadPosRankSum=-0.302;SOR=2.471	GT:AD:DP:GQ:PL	0/1:27,20:47:99:740,0,1039	4	2.21743	2.14379	0.569937	1.94321	1.78065	0.333424
d225006	Ib	Diap2	FBgn0015247	-1	2R:15932857	1	2R	15932857	T	C	AG	TRUE	16	592.03	AC=2;AF=1.00;AN=2;DP=16;ExcessHet=3.0103;FS=0.000;MLEAC=2;MLEAF=1.00;MQ=60.00;QD=30.38;SOR=1.244	GT:AD:DP:GQ:PL	1/1:0,16:16:48:606,48,0	4	2.21743	2.14379	0.569937	1.94321	1.78065	0.333424
d225006	Ib	Diap2	FBgn0015247	-1	2R:15932884	1	2R	15932884	T	C	AG	TRUE	15	540.03	AC=2;AF=1.00;AN=2;DP=15;ExcessHet=3.0103;FS=0.000;MLEAC=2;MLEAF=1.00;MQ=60.00;QD=31.83;SOR=1.112	GT:AD:DP:GQ:PL	1/1:0,15:15:45:554,45,0	4	2.21743	2.14379	0.569937	1.94321	1.78065	0.333424
d225006	Ib	Diap2	FBgn0015247	-1	2R:15933013	1	2R	15933013	T	C	AG	TRUE	20	645.03	AC=2;AF=1.00;AN=2;DP=20;ExcessHet=3.0103;FS=0.000;MLEAC=2;MLEAF=1.00;MQ=60.00;QD=32.25;SOR=1.402	GT:AD:DP:GQ:PL	1/1:0,20:20:59:659,59,0	4	2.21743	2.14379	0.569937	1.94321	1.78065	0.333424
d225006	Ib	bug	FBgn0034050	1	2R:15935345	0.3375	2R	15935345	A	G	AG	TRUE	80	761.6	AC=1;AF=0.500;AN=2;BaseQRankSum=3.932;DP=80;ExcessHet=3.0103;FS=27.947;MLEAC=1;MLEAF=0.500;MQ=60.00;MQRankSum=0.000;QD=9.52;ReadPosRankSum=3.488;SOR=1.329	GT:AD:DP:GQ:PL	0/1:53,27:80:99:769,0,1527	4	1.45112	2.51366	0.00831639	1.71608	1.56393	0.333424
d225006	Ib	Got1	FBgn0001124	1	2R:16141326	0.545741	2R	16141326	A	G	AG	TRUE	349	5256.6	AC=1;AF=0.500;AN=2;BaseQRankSum=10.029;DP=349;ExcessHet=3.0103;FS=5.952;MLEAC=1;MLEAF=0.500;MQ=60.00;MQRankSum=0.000;QD=16.58;ReadPosRankSum=1.454;SOR=0.465	GT:AD:DP:GQ:PL	0/1:144,173:317:99:5264,0,3788	4	4.46672	4.50823	0.923616	5.08115	5.69811	0.333424
d225006	Ib	mthl3	FBgn0028956	-1	2R:17448809	0.315789	2R	17448809	T	C	AG	TRUE	19	289.6	AC=1;AF=0.500;AN=2;BaseQRankSum=2.812;DP=19;ExcessHet=3.0103;FS=29.863;MLEAC=1;MLEAF=0.500;MQ=60.00;MQRankSum=0.000;QD=15.24;ReadPosRankSum=-3.469;SOR=3.893	GT:AD:DP:GQ:PL	0/1:13,6:19:99:297,0,522	4	0.814694	0.546976	0.535499	2.78478	2.80729	0.333424
d225006	Ib	betaTub56D	FBgn0284243	-1	2R:19447593	0.203961	2R	19447593	T	C	AG	TRUE	1904	10298.6	AC=1;AF=0.500;AN=2;BaseQRankSum=8.592;DP=1904;ExcessHet=3.0103;FS=75.817;MLEAC=1;MLEAF=0.500;MQ=60.00;MQRankSum=0.000;QD=5.51;ReadPosRankSum=-3.278;SOR=3.650	GT:AD:DP:GQ:PL	0/1:1487,381:1868:99:10306,0,62667	4	12.035	12.8548	5.33957e-11	7.87017	8.37422	0.333424
d225006	Ib	mago	FBgn0002736	1	2R:21128756	0.482456	2R	21128756	A	G	AG	TRUE	114	1727.6	AC=1;AF=0.500;AN=2;BaseQRankSum=6.769;DP=114;ExcessHet=3.0103;FS=0.775;MLEAC=1;MLEAF=0.500;MQ=60.00;MQRankSum=0.000;QD=15.15;ReadPosRankSum=-1.593;SOR=0.852	GT:AD:DP:GQ:PL	0/1:59,55:114:99:1735,0,1674	4	3.46187	3.46022	0.901201	3.13284	3.19197	0.333424
d225006	Ib	mago	FBgn0002736	1	2R:21128870	0.57265	2R	21128870	A	G	AG	TRUE	117	2659.6	AC=1;AF=0.500;AN=2;BaseQRankSum=5.884;DP=117;ExcessHet=3.0103;FS=5.722;MLEAC=1;MLEAF=0.500;MQ=60.00;MQRankSum=0.000;QD=22.73;ReadPosRankSum=2.112;SOR=0.886	GT:AD:DP:GQ:PL	0/1:50,67:117:99:2667,0,2053	4	3.46187	3.46022	0.901201	3.13284	3.19197	0.333424
d225006	Ib	mago	FBgn0002736	1	2R:21128873	0.564516	2R	21128873	A	G	AG	TRUE	124	2782.6	AC=1;AF=0.500;AN=2;BaseQRankSum=6.144;DP=124;ExcessHet=3.0103;FS=4.346;MLEAC=1;MLEAF=0.500;MQ=60.00;MQRankSum=0.000;QD=22.44;ReadPosRankSum=2.224;SOR=1.085	GT:AD:DP:GQ:PL	0/1:54,70:124:99:2790,0,2086	4	3.46187	3.46022	0.901201	3.13284	3.19197	0.333424
d225006	Ib	mago	FBgn0002736	1	2R:21128882	0.593496	2R	21128882	A	G	AG	TRUE	123	2908.6	AC=1;AF=0.500;AN=2;BaseQRankSum=3.328;DP=123;ExcessHet=3.0103;FS=1.464;MLEAC=1;MLEAF=0.500;MQ=60.00;MQRankSum=0.000;QD=23.65;ReadPosRankSum=-0.271;SOR=0.871	GT:AD:DP:GQ:PL	0/1:50,73:123:99:2916,0,1912	4	3.46187	3.46022	0.901201	3.13284	3.19197	0.333424
d225006	Ib	LSm1	FBgn0261067	-1	2R:21170134	0.290323	2R	21170134	T	C	AG	TRUE	31	212.6	AC=1;AF=0.500;AN=2;BaseQRankSum=3.243;DP=31;ExcessHet=3.0103;FS=0.000;MLEAC=1;MLEAF=0.500;MQ=60.00;MQRankSum=0.000;QD=6.86;ReadPosRankSum=-0.240;SOR=0.418	GT:AD:DP:GQ:PL	0/1:22,9:31:99:220,0,656	4	2.38697	2.29325	0.794987	1.95004	2.11175	0.333424
d225006	Ib	bonsai	FBgn0026261	1	2R:22638356	0.666667	2R	22638356	A	G	AG	TRUE	15	385.6	AC=1;AF=0.500;AN=2;BaseQRankSum=-0.763;DP=15;ExcessHet=3.0103;FS=6.166;MLEAC=1;MLEAF=0.500;MQ=60.00;MQRankSum=0.000;QD=25.71;ReadPosRankSum=1.902;SOR=2.712	GT:AD:DP:GQ:PL	0/1:5,10:15:99:393,0,163	4	2.83839	2.59942	0.957558	1.58577	1.84416	0.333424
d225006	Ib	CG2765	FBgn0035087	-1	2R:24961078	0.73913	2R	24961078	T	C	AG	TRUE	23	581.6	AC=1;AF=0.500;AN=2;BaseQRankSum=3.658;DP=23;ExcessHet=3.0103;FS=8.828;MLEAC=1;MLEAF=0.500;MQ=60.00;MQRankSum=0.000;QD=25.29;ReadPosRankSum=-0.810;SOR=2.104	GT:AD:DP:GQ:PL	0/1:6,17:23:99:589,0,142	4	2.80939	3.30576	0.862088	1.20241	1.24671	0.333424
d225006	Ib	CG14591	FBgn0033054	-1	2R:6037128	0.5	2R	6037128	T	C	AG	TRUE	18	280.6	AC=1;AF=0.500;AN=2;BaseQRankSum=2.220;DP=18;ExcessHet=3.0103;FS=2.077;MLEAC=1;MLEAF=0.500;MQ=60.00;MQRankSum=0.000;QD=15.59;ReadPosRankSum=0.179;SOR=1.781	GT:AD:DP:GQ:PL	0/1:9,9:18:99:288,0,229	4	4.47495	4.49171	0.904654	0.132465	0.0680559	0.333424
d225006	Ib	puml	FBgn0033226	1	2R:7813863	0.130435	2R	7813863	A	G	AG	TRUE	46	83.6	AC=1;AF=0.500;AN=2;BaseQRankSum=3.860;DP=46;ExcessHet=3.0103;FS=1.757;MLEAC=1;MLEAF=0.500;MQ=60.00;MQRankSum=0.000;QD=1.82;ReadPosRankSum=0.524;SOR=1.329	GT:AD:DP:GQ:PL	0/1:40,6:46:91:91,0,1146	4	2.96619	2.88029	0.815089	2.94272	2.98054	0.333424
d225006	Ib	CSN4	FBgn0027054	1	2R:7973697	0.934426	2R	7973697	A	G	AG	TRUE	61	1896.02	AC=2;AF=1.00;AN=2;BaseQRankSum=2.236;DP=61;ExcessHet=3.0103;FS=0.000;MLEAC=2;MLEAF=1.00;MQ=60.00;MQRankSum=0.000;QD=31.08;ReadPosRankSum=-0.663;SOR=0.478	GT:AD:DP:GQ:PL	1/1:4,57:61:37:1910,37,0	4	2.71701	2.92813	0.927838	3.57475	3.3122	0.333424
d225006	Ib	Apt1	FBgn0042138	1	3L:11628408	0.16092	3L	11628408	A	G	AG	TRUE	87	206.6	AC=1;AF=0.500;AN=2;BaseQRankSum=1.347;DP=87;ExcessHet=3.0103;FS=44.468;MLEAC=1;MLEAF=0.500;MQ=60.00;MQRankSum=0.000;QD=2.37;ReadPosRankSum=-3.191;SOR=5.418	GT:AD:DP:GQ:PL	0/1:73,14:87:99:214,0,2849	4	7.03967	7.08104	0.899746	3.39757	3.11187	0.333424
d225006	Ib	CG32264	FBgn0052264	-1	3L:3717400	0.22	3L	3717400	T	C	AG	TRUE	50	333.6	AC=1;AF=0.500;AN=2;BaseQRankSum=1.770;DP=50;ExcessHet=3.0103;FS=27.855;MLEAC=1;MLEAF=0.500;MQ=60.00;MQRankSum=0.000;QD=6.67;ReadPosRankSum=2.500;SOR=3.420	GT:AD:DP:GQ:PL	0/1:39,11:50:99:341,0,1659	4	3.4169	3.8072	0.084539	3.09462	2.70509	0.333424
d225006	Ib	nAChRbeta1	FBgn0000038	1	3L:4430208	0.266667	3L	4430208	A	G	AG	TRUE	15	80.6	AC=1;AF=0.500;AN=2;BaseQRankSum=0.690;DP=15;ExcessHet=3.0103;FS=11.139;MLEAC=1;MLEAF=0.500;MQ=60.00;MQRankSum=0.000;QD=5.37;ReadPosRankSum=-1.647;SOR=1.409	GT:AD:DP:GQ:PL	0/1:11,4:15:88:88,0,318	4	6.35534	5.5438	0.188032	0.118617	0.0901246	0.333424
d225006	Ib	hth	FBgn0001235	-1	3R:10584920	1	3R	10584920	T	C	AG	TRUE	17	601.03	AC=2;AF=1.00;AN=2;DP=17;ExcessHet=3.0103;FS=0.000;MLEAC=2;MLEAF=1.00;MQ=60.00;QD=28.40;SOR=2.179	GT:AD:DP:GQ:PL	1/1:0,17:17:51:615,51,0	4	4.98397	5.64813	0.197441	4.70896	4.59923	0.333424
d225006	Ib	EndoA	FBgn0038659	1	3R:18910153	0.333333	3R	18910153	A	G	AG	TRUE	24	207.6	AC=1;AF=0.500;AN=2;BaseQRankSum=2.637;DP=24;ExcessHet=3.0103;FS=4.084;MLEAC=1;MLEAF=0.500;MQ=60.00;MQRankSum=0.000;QD=8.65;ReadPosRankSum=0.092;SOR=0.976	GT:AD:DP:GQ:PL	0/1:16,8:24:99:215,0,473	4	4.7728	5.29408	0.154643	0.85352	0.843628	0.333424
d225006	Ib	vib	FBgn0267975	-1	3R:19226523	0.409091	3R	19226523	T	C	AG	TRUE	22	272.6	AC=1;AF=0.500;AN=2;BaseQRankSum=4.006;DP=22;ExcessHet=3.0103;FS=0.000;MLEAC=1;MLEAF=0.500;MQ=60.00;MQRankSum=0.000;QD=12.39;ReadPosRankSum=1.677;SOR=0.569	GT:AD:DP:GQ:PL	0/1:13,9:22:99:280,0,333	4	5.02601	5.14846	0.946513	3.41525	3.2449	0.333424
d225006	Ib	Rlip	FBgn0026056	1	3R:21020562	0.363636	3R	21020562	A	G	AG	TRUE	11	113.6	AC=1;AF=0.500;AN=2;BaseQRankSum=2.965;DP=11;ExcessHet=3.0103;FS=0.000;MLEAC=1;MLEAF=0.500;MQ=60.00;MQRankSum=0.000;QD=10.33;ReadPosRankSum=0.473;SOR=0.693	GT:AD:DP:GQ:PL	0/1:7,4:11:99:121,0,193	4	1.73807	2.13756	0.804143	0.464341	0.479873	0.333424
d225006	Ib	Cow	FBgn0039054	-1	3R:23112549	0.642857	3R	23112549	T	C	AG	TRUE	14	277.6	AC=1;AF=0.500;AN=2;BaseQRankSum=2.612;DP=14;ExcessHet=3.0103;FS=0.000;MLEAC=1;MLEAF=0.500;MQ=60.00;MQRankSum=0.000;QD=19.83;ReadPosRankSum=1.155;SOR=0.593	GT:AD:DP:GQ:PL	0/1:5,9:14:99:285,0,99	4	6.07048	6.14794	0.757327	0.0371922	0.0664222	0.333424
d225006	Ib	unk	FBgn0004395	-1	3R:23151701	0.227273	3R	23151701	T	C	AG	TRUE	44	127.6	AC=1;AF=0.500;AN=2;BaseQRankSum=-0.955;DP=44;ExcessHet=3.0103;FS=0.000;MLEAC=1;MLEAF=0.500;MQ=60.00;MQRankSum=0.000;QD=2.90;ReadPosRankSum=0.168;SOR=0.551	GT:AD:DP:GQ:PL	0/1:34,10:44:99:135,0,980	4	3.87848	4.24654	0.727859	1.67041	1.89778	0.333424
d225006	Ib	ATPsynCF6	FBgn0016119	-1	3R:23355357	0.621622	3R	23355357	T	C	AG	TRUE	445	8201.6	AC=1;AF=0.500;AN=2;BaseQRankSum=8.771;DP=445;ExcessHet=3.0103;FS=0.679;MLEAC=1;MLEAF=0.500;MQ=60.00;MQRankSum=0.000;QD=18.47;ReadPosRankSum=-0.097;SOR=0.621	GT:AD:DP:GQ:PL	0/1:168,276:444:99:8209,0,4091	4	9.01907	8.99728	0.563116	8.34196	8.52202	0.333424
d225006	Ib	Sec13	FBgn0024509	1	3R:23357683	0.461538	3R	23357683	A	G	AG	TRUE	65	888.6	AC=1;AF=0.500;AN=2;BaseQRankSum=5.617;DP=65;ExcessHet=3.0103;FS=2.073;MLEAC=1;MLEAF=0.500;MQ=60.00;MQRankSum=0.000;QD=13.67;ReadPosRankSum=0.678;SOR=0.936	GT:AD:DP:GQ:PL	0/1:35,30:65:99:896,0,1329	4	3.99691	3.71929	0.929505	3.0338	3.04866	0.333424
d225006	Ib	Rpt5	FBgn0028684	1	3R:23754573	0.552632	3R	23754573	A	G	AG	TRUE	38	865.6	AC=1;AF=0.500;AN=2;BaseQRankSum=4.202;DP=38;ExcessHet=3.0103;FS=10.936;MLEAC=1;MLEAF=0.500;MQ=60.00;MQRankSum=0.000;QD=22.78;ReadPosRankSum=-1.311;SOR=3.567	GT:AD:DP:GQ:PL	0/1:17,21:38:99:873,0,648	4	5.93216	6.10852	0.925004	5.71526	5.18509	0.333424
d225006	Ib	Gdh	FBgn0001098	-1	3R:23936205	0.542857	3R	23936205	T	C	AG	TRUE	175	2998.6	AC=1;AF=0.500;AN=2;BaseQRankSum=9.288;DP=175;ExcessHet=3.0103;FS=0.000;MLEAC=1;MLEAF=0.500;MQ=60.00;MQRankSum=0.000;QD=17.13;ReadPosRankSum=-0.262;SOR=0.682	GT:AD:DP:GQ:PL	0/1:80,95:175:99:3006,0,2139	4	6.73636	5.26871	0.00814535	4.37474	4.57326	0.333424
d225006	Ib	Miro	FBgn0039140	-1	3R:24038423	0.571429	3R	24038423	T	C	AG	TRUE	14	230.6	AC=1;AF=0.500;AN=2;BaseQRankSum=2.588;DP=14;ExcessHet=3.0103;FS=2.363;MLEAC=1;MLEAF=0.500;MQ=60.00;MQRankSum=0.000;QD=16.47;ReadPosRankSum=-1.399;SOR=0.223	GT:AD:DP:GQ:PL	0/1:6,8:14:99:238,0,113	4	1.83471	1.66174	0.931822	1.477	1.35055	0.333424
d225006	Ib	Sec10	FBgn0266673	1	3R:24137107	0.428571	3R	24137107	A	G	AG	TRUE	21	270.6	AC=1;AF=0.500;AN=2;BaseQRankSum=3.911;DP=21;ExcessHet=3.0103;FS=10.942;MLEAC=1;MLEAF=0.500;MQ=60.00;MQRankSum=0.000;QD=12.89;ReadPosRankSum=-0.894;SOR=2.004	GT:AD:DP:GQ:PL	0/1:12,9:21:99:278,0,282	4	1.26464	1.79158	0.698029	0.62732	0.751224	0.333424
d225006	Ib	slo	FBgn0003429	1	3R:24707423	0.294118	3R	24707423	A	G	AG	TRUE	17	131.6	AC=1;AF=0.500;AN=2;BaseQRankSum=2.424;DP=17;ExcessHet=3.0103;FS=9.901;MLEAC=1;MLEAF=0.500;MQ=60.00;MQRankSum=0.000;QD=7.74;ReadPosRankSum=1.593;SOR=3.611	GT:AD:DP:GQ:PL	0/1:12,5:17:99:139,0,312	4	3.31874	4.49559	0.310436	1.1716	0.687207	0.333424
d225006	Ib	slo	FBgn0003429	1	3R:24708356	0.578947	3R	24708356	A	G	AG	TRUE	19	315.6	AC=1;AF=0.500;AN=2;BaseQRankSum=2.454;DP=19;ExcessHet=3.0103;FS=12.316;MLEAC=1;MLEAF=0.500;MQ=60.00;MQRankSum=0.000;QD=16.61;ReadPosRankSum=2.023;SOR=0.964	GT:AD:DP:GQ:PL	0/1:8,11:19:99:323,0,153	4	3.31874	4.49559	0.310436	1.1716	0.687207	0.333424
d225006	Ib	Ald1	FBgn0000064	-1	3R:26254245	0.512821	3R	26254245	T	C	AG	TRUE	274	4152.6	AC=1;AF=0.500;AN=2;BaseQRankSum=6.653;DP=274;ExcessHet=3.0103;FS=16.116;MLEAC=1;MLEAF=0.500;MQ=60.00;MQRankSum=0.000;QD=15.21;ReadPosRankSum=1.812;SOR=0.254	GT:AD:DP:GQ:PL	0/1:133,140:273:99:4160,0,3521	4	11.4026	10.0568	0.0414265	10.8637	11.1339	0.333424
d225006	Ib	Ald1	FBgn0000064	-1	3R:26254381	0.535385	3R	26254381	T	C	AG	TRUE	325	5566.6	AC=1;AF=0.500;AN=2;BaseQRankSum=8.320;DP=325;ExcessHet=3.0103;FS=0.854;MLEAC=1;MLEAF=0.500;MQ=60.00;MQRankSum=0.000;QD=17.13;ReadPosRankSum=2.155;SOR=0.632	GT:AD:DP:GQ:PL	0/1:151,174:325:99:5574,0,4446	4	11.4026	10.0568	0.0414265	10.8637	11.1339	0.333424
d225006	Ib	TfIIA-L	FBgn0011289	1	3R:27255644	0.179487	3R	27255644	A	G	AG	TRUE	117	374.6	AC=1;AF=0.500;AN=2;BaseQRankSum=4.738;DP=117;ExcessHet=3.0103;FS=3.252;MLEAC=1;MLEAF=0.500;MQ=60.00;MQRankSum=0.000;QD=3.20;ReadPosRankSum=-2.071;SOR=0.905	GT:AD:DP:GQ:PL	0/1:96,21:117:99:382,0,2702	4	2.98054	3.12474	0.877624	2.55085	2.08212	0.333424
d225006	Ib	Hmu	FBgn0015737	1	3R:27290230	0.692308	3R	27290230	A	G	AG	TRUE	39	881.6	AC=1;AF=0.500;AN=2;BaseQRankSum=4.026;DP=39;ExcessHet=3.0103;FS=0.000;MLEAC=1;MLEAF=0.500;MQ=60.00;MQRankSum=0.000;QD=22.61;ReadPosRankSum=-2.076;SOR=0.765	GT:AD:DP:GQ:PL	0/1:12,27:39:99:889,0,255	4	5.87173	5.77395	0.390105	2.59234	2.73469	0.333424
d225006	Ib	Pkc98E	FBgn0003093	1	3R:29046298	0.925	3R	29046298	A	G	AG	TRUE	40	1508.6	AC=1;AF=0.500;AN=2;BaseQRankSum=0.053;DP=40;ExcessHet=3.0103;FS=0.000;MLEAC=1;MLEAF=0.500;MQ=60.00;MQRankSum=0.000;QD=32.06;ReadPosRankSum=1.056;SOR=0.440	GT:AD:DP:GQ:PL	0/1:3,37:40:65:1516,0,65	4	4.42269	4.69937	0.833844	1.73884	1.5978	0.333424
d225006	Ib	Ptp99A	FBgn0004369	1	3R:29483303	0.454545	3R	29483303	A	G	AG	TRUE	11	150.6	AC=1;AF=0.500;AN=2;BaseQRankSum=3.067;DP=11;ExcessHet=3.0103;FS=2.463;MLEAC=1;MLEAF=0.500;MQ=60.00;MQRankSum=0.000;QD=13.69;ReadPosRankSum=-1.532;SOR=0.760	GT:AD:DP:GQ:PL	0/1:6,5:11:99:158,0,150	4	4.34922	4.16541	0.576197	1.29803	1.03192	0.333424
d225006	Ib	CG1907	FBgn0039674	1	3R:29620590	0.442623	3R	29620590	A	G	AG	TRUE	61	1072.6	AC=1;AF=0.500;AN=2;BaseQRankSum=5.246;DP=61;ExcessHet=3.0103;FS=2.332;MLEAC=1;MLEAF=0.500;MQ=60.00;MQRankSum=0.000;QD=17.58;ReadPosRankSum=0.065;SOR=0.428	GT:AD:DP:GQ:PL	0/1:34,27:61:99:1080,0,1338	4	2.96927	1.9565	0.114002	3.63121	3.23907	0.333424
d225006	Ib	kay	FBgn0001297	1	3R:29792043	0.904762	3R	29792043	A	G	AG	TRUE	21	607.91	AC=2;AF=1.00;AN=2;BaseQRankSum=1.542;DP=21;ExcessHet=3.0103;FS=0.000;MLEAC=2;MLEAF=1.00;MQ=60.00;MQRankSum=0.000;QD=28.95;ReadPosRankSum=-1.206;SOR=1.022	GT:AD:DP:GQ:PL	1/1:2,19:21:16:622,16,0	4	5.08707	5.90756	0.125239	4.66592	4.33526	0.333424
d225006	Ib	kay	FBgn0001297	1	3R:29794088	0.75	3R	29794088	A	G	AG	TRUE	32	796.6	AC=1;AF=0.500;AN=2;BaseQRankSum=3.642;DP=32;ExcessHet=3.0103;FS=0.000;MLEAC=1;MLEAF=0.500;MQ=60.00;MQRankSum=0.000;QD=24.89;ReadPosRankSum=-1.014;SOR=2.165	GT:AD:DP:GQ:PL	0/1:8,24:32:99:804,0,184	4	5.08707	5.90756	0.125239	4.66592	4.33526	0.333424
d225006	Ib	Etfb	FBgn0039697	-1	3R:29801970	0.445545	3R	29801970	T	C	AG	TRUE	101	1395.6	AC=1;AF=0.500;AN=2;BaseQRankSum=7.244;DP=101;ExcessHet=3.0103;FS=4.961;MLEAC=1;MLEAF=0.500;MQ=60.00;MQRankSum=0.000;QD=13.82;ReadPosRankSum=2.552;SOR=1.182	GT:AD:DP:GQ:PL	0/1:56,45:101:99:1403,0,1561	4	3.23977	2.84256	0.833576	4.60934	4.72143	0.333424
d225006	Ib	Etfb	FBgn0039697	-1	3R:29802318	0.606383	3R	29802318	T	C	AG	TRUE	94	1799.6	AC=1;AF=0.500;AN=2;BaseQRankSum=5.654;DP=94;ExcessHet=3.0103;FS=1.828;MLEAC=1;MLEAF=0.500;MQ=60.00;MQRankSum=0.000;QD=19.14;ReadPosRankSum=-0.195;SOR=1.005	GT:AD:DP:GQ:PL	0/1:37,57:94:99:1807,0,954	4	3.23977	2.84256	0.833576	4.60934	4.72143	0.333424
d225006	Ib	RpS8	FBgn0039713	1	3R:29863650	0.257732	3R	29863650	A	G	AG	TRUE	97	635.6	AC=1;AF=0.500;AN=2;BaseQRankSum=2.593;DP=97;ExcessHet=3.0103;FS=0.000;MLEAC=1;MLEAF=0.500;MQ=60.00;MQRankSum=0.000;QD=6.55;ReadPosRankSum=1.207;SOR=0.404	GT:AD:DP:GQ:PL	0/1:72,25:97:99:643,0,2219	4	12.4079	12.3182	0.473228	11.7965	11.7074	0.333424
d225006	Ib	VhaAC45RP	FBgn0051030	-1	3R:30165949	0.913978	3R	30165949	T	C	AG	TRUE	93	3339.61	AC=1;AF=0.500;AN=2;BaseQRankSum=1.428;DP=93;ExcessHet=3.0103;FS=3.276;MLEAC=1;MLEAF=0.500;MQ=60.00;MQRankSum=0.000;QD=29.15;ReadPosRankSum=0.034;SOR=0.314	GT:AD:DP:GQ:PL	0/1:8,85:93:19:3347,0,19	4	6.3392	6.42463	0.721484	0.410326	0.49666	0.333424
d225006	Ib	VhaAC45RP	FBgn0051030	-1	3R:30166215	0.794872	3R	30166215	T	C	AG	TRUE	78	1950.6	AC=1;AF=0.500;AN=2;BaseQRankSum=3.588;DP=78;ExcessHet=3.0103;FS=24.573;MLEAC=1;MLEAF=0.500;MQ=60.00;MQRankSum=0.000;QD=25.01;ReadPosRankSum=-0.149;SOR=1.468	GT:AD:DP:GQ:PL	0/1:16,62:78:99:1958,0,295	4	6.3392	6.42463	0.721484	0.410326	0.49666	0.333424
d225006	Ib	CG1983	FBgn0039751	-1	3R:30176517	0.375	3R	30176517	T	C	AG	TRUE	40	554.6	AC=1;AF=0.500;AN=2;BaseQRankSum=3.039;DP=40;ExcessHet=3.0103;FS=8.007;MLEAC=1;MLEAF=0.500;MQ=60.00;MQRankSum=0.000;QD=13.87;ReadPosRankSum=-2.134;SOR=2.144	GT:AD:DP:GQ:PL	0/1:25,15:40:99:562,0,1002	4	2.38572	2.69018	0.980606	1.77594	1.87856	0.333424
d225006	Ib	CG1983	FBgn0039751	-1	3R:30176862	0.5	3R	30176862	T	C	AG	TRUE	30	449.6	AC=1;AF=0.500;AN=2;BaseQRankSum=1.321;DP=30;ExcessHet=3.0103;FS=3.315;MLEAC=1;MLEAF=0.500;MQ=60.00;MQRankSum=0.000;QD=14.99;ReadPosRankSum=-3.093;SOR=0.929	GT:AD:DP:GQ:PL	0/1:15,15:30:99:457,0,453	4	2.38572	2.69018	0.980606	1.77594	1.87856	0.333424
d225006	Ib	CG9743	FBgn0039756	-1	3R:30198612	0.590909	3R	30198612	T	C	AG	TRUE	22	412.6	AC=1;AF=0.500;AN=2;BaseQRankSum=3.731;DP=22;ExcessHet=3.0103;FS=1.792;MLEAC=1;MLEAF=0.500;MQ=60.00;MQRankSum=0.000;QD=18.75;ReadPosRankSum=-0.669;SOR=1.329	GT:AD:DP:GQ:PL	0/1:9,13:22:99:420,0,250	4	2.09625	3.69448	0.234003	1.02718	1.08195	0.333424
d225006	Ib	mRpL32	FBgn0039835	1	3R:31253063	1	3R	31253063	A	G	AG	TRUE	16	697.03	AC=2;AF=1.00;AN=2;DP=16;ExcessHet=3.0103;FS=0.000;MLEAC=2;MLEAF=1.00;MQ=60.00;QD=29.96;SOR=1.244	GT:AD:DP:GQ:PL	1/1:0,16:16:49:711,49,0	4	2.49773	3.27599	0.876728	1.35927	1.34085	0.333424
d225006	Ib	CycG	FBgn0039858	-1	3R:31601551	0.373333	3R	31601551	T	C	AG	TRUE	75	783.6	AC=1;AF=0.500;AN=2;BaseQRankSum=3.579;DP=75;ExcessHet=3.0103;FS=3.247;MLEAC=1;MLEAF=0.500;MQ=60.00;MQRankSum=0.000;QD=10.45;ReadPosRankSum=1.677;SOR=0.625	GT:AD:DP:GQ:PL	0/1:47,28:75:99:791,0,1357	4	6.749	7.09638	0.463947	5.43584	5.80647	0.333424
d225006	Ib	awd	FBgn0000150	-1	3R:31745955	1	3R	31745955	T	C	AG	TRUE	19	603.03	AC=2;AF=1.00;AN=2;DP=19;ExcessHet=3.0103;FS=0.000;MLEAC=2;MLEAF=1.00;MQ=60.00;QD=33.50;SOR=2.833	GT:AD:DP:GQ:PL	1/1:0,18:18:54:617,54,0	4	11.4307	11.3852	0.780141	9.45494	9.86209	0.333424
d225006	Ib	cpx	FBgn0041605	1	3R:4297504	0.540541	3R	4297504	A	G	AG	TRUE	37	625.6	AC=1;AF=0.500;AN=2;BaseQRankSum=4.116;DP=37;ExcessHet=3.0103;FS=6.744;MLEAC=1;MLEAF=0.500;MQ=60.00;MQRankSum=0.000;QD=16.91;ReadPosRankSum=-2.020;SOR=2.256	GT:AD:DP:GQ:PL	0/1:17,20:37:99:633,0,464	4	7.90852	7.29727	0.637321	0.177459	0.228242	0.333424
d225006	Ib	cpx	FBgn0041605	1	3R:4297518	0.193548	3R	4297518	A	G	AG	TRUE	62	259.6	AC=1;AF=0.500;AN=2;BaseQRankSum=5.170;DP=62;ExcessHet=3.0103;FS=3.644;MLEAC=1;MLEAF=0.500;MQ=60.00;MQRankSum=0.000;QD=4.19;ReadPosRankSum=0.341;SOR=0.242	GT:AD:DP:GQ:PL	0/1:50,12:62:99:267,0,1549	4	7.90852	7.29727	0.637321	0.177459	0.228242	0.333424
d225006	Ib	Sec23	FBgn0262125	1	3R:5650231	0.190476	3R	5650231	A	G	AG	TRUE	21	81.6	AC=1;AF=0.500;AN=2;BaseQRankSum=3.191;DP=21;ExcessHet=3.0103;FS=5.076;MLEAC=1;MLEAF=0.500;MQ=60.00;MQRankSum=0.000;QD=3.89;ReadPosRankSum=0.815;SOR=1.510	GT:AD:DP:GQ:PL	0/1:17,4:21:89:89,0,487	4	3.14569	3.83924	0.425454	2.08578	2.26094	0.333424
d225006	Ib	Sec23	FBgn0262125	1	3R:5650351	0.3125	3R	5650351	A	G	AG	TRUE	16	118.6	AC=1;AF=0.500;AN=2;BaseQRankSum=1.953;DP=16;ExcessHet=3.0103;FS=10.296;MLEAC=1;MLEAF=0.500;MQ=60.00;MQRankSum=0.000;QD=7.41;ReadPosRankSum=0.908;SOR=3.604	GT:AD:DP:GQ:PL	0/1:11,5:16:99:126,0,303	4	3.14569	3.83924	0.425454	2.08578	2.26094	0.333424
d225006	Ib	beag	FBgn0037660	-1	3R:9063537	0.882353	3R	9063537	T	C	AG	TRUE	17	606.6	AC=1;AF=0.500;AN=2;BaseQRankSum=-2.241;DP=17;ExcessHet=3.0103;FS=16.564;MLEAC=1;MLEAF=0.500;MQ=60.00;MQRankSum=0.000;QD=29.10;ReadPosRankSum=-2.205;SOR=4.032	GT:AD:DP:GQ:PL	0/1:2,15:17:39:614,0,39	4	1.54635	1.3782	0.945538	1.39988	1.21946	0.333424
d225006	Ib	Sh	FBgn0003380	-1	X:17950057	1	X	17950057	T	C	AG	TRUE	16	573.03	AC=2;AF=1.00;AN=2;DP=16;ExcessHet=3.0103;FS=0.000;MLEAC=2;MLEAF=1.00;MQ=60.00;QD=31.60;SOR=1.244	GT:AD:DP:GQ:PL	1/1:0,16:16:48:587,48,0	4	5.78478	5.98037	0.885151	2.25586	1.88036	0.333424
d225006	Ib	DIP1	FBgn0024807	-1	X:21629725	0.666667	X	21629725	T	C	AG	TRUE	12	212.6	AC=1;AF=0.500;AN=2;BaseQRankSum=0.574;DP=12;ExcessHet=3.0103;FS=0.000;MLEAC=1;MLEAF=0.500;MQ=60.00;MQRankSum=0.000;QD=17.72;ReadPosRankSum=0.817;SOR=1.179	GT:AD:DP:GQ:PL	0/1:4,8:12:70:220,0,70	4	4.22571	4.66995	0.917906	1.90808	1.68313	0.333424
d225006	Ib	CG15771	FBgn0029801	1	X:5759154	0.676471	X	5759154	A	G	AG	TRUE	34	614.6	AC=1;AF=0.500;AN=2;BaseQRankSum=-1.259;DP=34;ExcessHet=3.0103;FS=7.496;MLEAC=1;MLEAF=0.500;MQ=60.00;MQRankSum=0.000;QD=18.08;ReadPosRankSum=-2.498;SOR=2.465	GT:AD:DP:GQ:PL	0/1:11,23:34:99:622,0,256	4	2.77403	1.38228	0.00798382	0.981371	1.0088	0.333424
d225007	Ib	ThrRS	FBgn0027081	1	2L:12106021	1	2L	12106021	A	G	AG	TRUE	49	1728.03	AC=2;AF=1.00;AN=2;DP=49;ExcessHet=3.0103;FS=0.000;MLEAC=2;MLEAF=1.00;MQ=60.00;QD=26.73;SOR=0.909	GT:AD:DP:GQ:PL	1/1:0,49:49:99:1742,146,0	4	5.11791	5.14664	0.914631	2.22626	2.05694	3.98732
d225007	Ib	CG16974	FBgn0032479	-1	2L:13189312	0.784661	2L	13189312	T	C	AG	TRUE	340	8680.6	AC=1;AF=0.500;AN=2;BaseQRankSum=8.066;DP=340;ExcessHet=3.0103;FS=0.488;MLEAC=1;MLEAF=0.500;MQ=60.00;MQRankSum=0.000;QD=25.61;ReadPosRankSum=-0.604;SOR=0.737	GT:AD:DP:GQ:PL	0/1:73,266:339:99:8688,0,1367	4	3.8107	3.63081	0.755289	1.61977	1.51626	3.98732
d225007	Ib	CG9662	FBgn0031529	-1	2L:3375848	1	2L	3375848	T	C	AG	TRUE	19	702.03	AC=2;AF=1.00;AN=2;DP=19;ExcessHet=3.0103;FS=0.000;MLEAC=2;MLEAF=1.00;MQ=60.00;QD=30.65;SOR=5.994	GT:AD:DP:GQ:PL	1/1:0,19:19:57:716,57,0	4	4.79971	4.26303	0.58721	2.25071	2.37554	3.98732
d225007	Ib	CG31650	FBgn0031673	-1	2L:5042598	0.258065	2L	5042598	T	C	AG	TRUE	217	1415.6	AC=1;AF=0.500;AN=2;BaseQRankSum=8.617;DP=217;ExcessHet=3.0103;FS=14.290;MLEAC=1;MLEAF=0.500;MQ=60.00;MQRankSum=0.000;QD=6.52;ReadPosRankSum=0.242;SOR=0.231	GT:AD:DP:GQ:PL	0/1:161,56:217:99:1423,0,4018	4	4.95708	5.02313	0.952346	2.11362	1.73761	3.98732
d225007	Ib	Msp300	FBgn0261836	1	2L:5164694	1	2L	5164694	A	G	AG	TRUE	44	1616.03	AC=2;AF=1.00;AN=2;DP=44;ExcessHet=3.0103;FS=0.000;MLEAC=2;MLEAF=1.00;MQ=60.00;QD=27.29;SOR=1.828	GT:AD:DP:GQ:PL	1/1:0,44:44:99:1630,132,0	4	5.66863	5.5634	0.880478	3.31906	3.19027	3.98732
d225007	Ib	Msp300	FBgn0261836	1	2L:5205966	0.288732	2L	5205966	A	G	AG	TRUE	142	1009.6	AC=1;AF=0.500;AN=2;BaseQRankSum=5.193;DP=142;ExcessHet=3.0103;FS=17.162;MLEAC=1;MLEAF=0.500;MQ=60.00;MQRankSum=0.000;QD=7.11;ReadPosRankSum=0.372;SOR=0.236	GT:AD:DP:GQ:PL	0/1:101,41:142:99:1017,0,2955	4	5.66863	5.5634	0.880478	3.31906	3.19027	3.98732
d225007	Ib	Msp300	FBgn0261836	1	2L:5206015	0.185567	2L	5206015	A	G	AG	TRUE	194	1104.6	AC=1;AF=0.500;AN=2;BaseQRankSum=6.336;DP=194;ExcessHet=3.0103;FS=16.507;MLEAC=1;MLEAF=0.500;MQ=60.00;MQRankSum=0.000;QD=5.69;ReadPosRankSum=-1.332;SOR=0.113	GT:AD:DP:GQ:PL	0/1:158,36:194:99:1112,0,7880	4	5.66863	5.5634	0.880478	3.31906	3.19027	3.98732
d225007	Ib	nrv2	FBgn0015777	-1	2L:6789976	0.392857	2L	6789976	T	C	AG	TRUE	56	668.6	AC=1;AF=0.500;AN=2;BaseQRankSum=6.429;DP=56;ExcessHet=3.0103;FS=8.391;MLEAC=1;MLEAF=0.500;MQ=60.00;MQRankSum=0.000;QD=11.94;ReadPosRankSum=-0.994;SOR=3.098	GT:AD:DP:GQ:PL	0/1:34,22:56:99:676,0,1030	4	3.48474	2.11119	0.017969	1.38147	1.80436	3.98732
d225007	Ib	Nckx30C	FBgn0028704	-1	2L:9717614	0.2	2L	9717614	T	C	AG	TRUE	60	227.6	AC=1;AF=0.500;AN=2;BaseQRankSum=2.441;DP=60;ExcessHet=3.0103;FS=15.062;MLEAC=1;MLEAF=0.500;MQ=60.00;MQRankSum=0.000;QD=3.79;ReadPosRankSum=0.968;SOR=0.630	GT:AD:DP:GQ:PL	0/1:48,12:60:99:235,0,1401	4	4.99389	4.09503	0.0412382	0.0832012	0.108464	3.98732
d225007	Ib	Nckx30C	FBgn0028704	-1	2L:9733349	1	2L	9733349	T	C	AG	TRUE	17	533.03	AC=2;AF=1.00;AN=2;DP=17;ExcessHet=3.0103;FS=0.000;MLEAC=2;MLEAF=1.00;MQ=60.00;QD=31.35;SOR=0.804	GT:AD:DP:GQ:PL	1/1:0,17:17:51:547,51,0	4	4.99389	4.09503	0.0412382	0.0832012	0.108464	3.98732
d225007	Ib	14-3-3zeta	FBgn0004907	1	2R:10108802	0.13438	2R	10108802	A	G	AG	TRUE	574	915.6	AC=1;AF=0.500;AN=2;BaseQRankSum=4.416;DP=574;ExcessHet=3.0103;FS=2.773;MLEAC=1;MLEAF=0.500;MQ=60.00;MQRankSum=0.000;QD=1.60;ReadPosRankSum=-1.635;SOR=1.089	GT:AD:DP:GQ:PL	0/1:496,77:573:99:923,0,15853	4	10.0161	10.0638	0.920612	8.20641	7.91397	3.98732
d225007	Ib	RNaseZ	FBgn0028426	-1	2R:10307375	1	2R	10307375	T	C	AG	TRUE	64	2849.03	AC=2;AF=1.00;AN=2;DP=64;ExcessHet=3.0103;FS=0.000;MLEAC=2;MLEAF=1.00;MQ=60.00;QD=34.19;SOR=6.932	GT:AD:DP:GQ:PL	1/1:0,64:64:99:2863,193,0	4	0.912224	0.704883	0.672113	0.569709	0.392617	3.98732
d225007	Ib	RpS15Ab	FBgn0033555	1	2R:10822219	0.111111	2R	10822219	A	G	AG	TRUE	54	96.6	AC=1;AF=0.500;AN=2;BaseQRankSum=1.535;DP=54;ExcessHet=3.0103;FS=44.464;MLEAC=1;MLEAF=0.500;MQ=60.00;MQRankSum=0.000;QD=1.79;ReadPosRankSum=-0.470;SOR=3.892	GT:AD:DP:GQ:PL	0/1:48,6:54:99:104,0,1847	4	3.76529	3.1313	0.134754	5.69163	5.75158	3.98732
d225007	Ib	RpS15Ab	FBgn0033555	1	2R:10822309	0.307692	2R	10822309	A	G	AG	TRUE	39	279.6	AC=1;AF=0.500;AN=2;BaseQRankSum=0.357;DP=39;ExcessHet=3.0103;FS=40.974;MLEAC=1;MLEAF=0.500;MQ=60.00;MQRankSum=0.000;QD=7.17;ReadPosRankSum=-1.098;SOR=5.132	GT:AD:DP:GQ:PL	0/1:27,12:39:99:287,0,729	4	3.76529	3.1313	0.134754	5.69163	5.75158	3.98732
d225007	Ib	CG12942	FBgn0033569	1	2R:10897181	1	2R	10897181	A	G	AG	TRUE	37	1214.03	AC=2;AF=1.00;AN=2;DP=37;ExcessHet=3.0103;FS=0.000;MLEAC=2;MLEAF=1.00;MQ=60.00;QD=32.81;SOR=4.351	GT:AD:DP:GQ:PL	1/1:0,37:37:99:1228,109,0	4	0.399958	0.555292	0.715167	0.384429	0.464199	3.98732
d225007	Ib	GLS	FBgn0261625	-1	2R:12671884	0.834783	2R	12671884	T	C	AG	TRUE	115	3188.6	AC=1;AF=0.500;AN=2;BaseQRankSum=5.402;DP=115;ExcessHet=3.0103;FS=13.863;MLEAC=1;MLEAF=0.500;MQ=60.00;MQRankSum=0.000;QD=27.73;ReadPosRankSum=0.302;SOR=1.207	GT:AD:DP:GQ:PL	0/1:19,96:115:99:3196,0,206	4	3.11216	3.49617	0.657215	0.866847	1.01098	3.98732
d225007	Ib	CG3955	FBgn0033793	-1	2R:13128147	0.35023	2R	13128147	T	C	AG	TRUE	217	2007.6	AC=1;AF=0.500;AN=2;BaseQRankSum=5.018;DP=217;ExcessHet=3.0103;FS=15.532;MLEAC=1;MLEAF=0.500;MQ=60.00;MQRankSum=0.000;QD=9.25;ReadPosRankSum=-0.423;SOR=0.244	GT:AD:DP:GQ:PL	0/1:141,76:217:99:2015,0,4262	4	4.54626	4.75042	0.982538	0.118374	0.14535	3.98732
d225007	Ib	CG6329	FBgn0033872	1	2R:13832057	0.834559	2R	13832057	A	G	AG	TRUE	272	9284.6	AC=1;AF=0.500;AN=2;BaseQRankSum=1.067;DP=272;ExcessHet=3.0103;FS=10.392;MLEAC=1;MLEAF=0.500;MQ=60.00;MQRankSum=0.000;QD=34.13;ReadPosRankSum=-1.927;SOR=0.272	GT:AD:DP:GQ:PL	0/1:45,227:272:99:9292,0,1206	4	6.30782	5.19838	0.0246684	0.326178	0.229277	3.98732
d225007	Ib	CG6329	FBgn0033872	1	2R:13832539	0.423423	2R	13832539	A	G	AG	TRUE	222	2739.6	AC=1;AF=0.500;AN=2;BaseQRankSum=9.030;DP=222;ExcessHet=3.0103;FS=9.979;MLEAC=1;MLEAF=0.500;MQ=60.00;MQRankSum=0.000;QD=12.34;ReadPosRankSum=1.124;SOR=1.284	GT:AD:DP:GQ:PL	0/1:128,94:222:99:2747,0,3573	4	6.30782	5.19838	0.0246684	0.326178	0.229277	3.98732
d225007	Ib	ReepB	FBgn0033906	1	2R:14172781	0.494	2R	14172781	A	G	AG	TRUE	500	7435.6	AC=1;AF=0.500;AN=2;BaseQRankSum=10.926;DP=500;ExcessHet=3.0103;FS=4.132;MLEAC=1;MLEAF=0.500;MQ=60.00;MQRankSum=0.000;QD=14.87;ReadPosRankSum=-2.917;SOR=1.033	GT:AD:DP:GQ:PL	0/1:253,247:500:99:7443,0,7358	4	8.82339	8.47452	0.973655	7.40431	7.35215	3.98732
d225007	Ib	ReepB	FBgn0033906	1	2R:14172820	0.455142	2R	14172820	A	G	AG	TRUE	457	6386.6	AC=1;AF=0.500;AN=2;BaseQRankSum=14.135;DP=457;ExcessHet=3.0103;FS=2.399;MLEAC=1;MLEAF=0.500;MQ=60.00;MQRankSum=0.000;QD=13.98;ReadPosRankSum=0.558;SOR=0.991	GT:AD:DP:GQ:PL	0/1:249,208:457:99:6394,0,6130	4	8.82339	8.47452	0.973655	7.40431	7.35215	3.98732
d225007	Ib	mRpS16	FBgn0033907	-1	2R:14173081	0.814815	2R	14173081	T	C	AG	TRUE	54	1784.6	AC=1;AF=0.500;AN=2;BaseQRankSum=3.977;DP=54;ExcessHet=3.0103;FS=13.022;MLEAC=1;MLEAF=0.500;MQ=60.00;MQRankSum=0.000;QD=33.05;ReadPosRankSum=0.458;SOR=3.164	GT:AD:DP:GQ:PL	0/1:10,44:54:99:1792,0,213	4	2.9769	2.95758	0.828541	2.15934	1.92185	3.98732
d225007	Ib	Diap2	FBgn0015247	-1	2R:15932857	1	2R	15932857	T	C	AG	TRUE	18	587.03	AC=2;AF=1.00;AN=2;DP=18;ExcessHet=3.0103;FS=0.000;MLEAC=2;MLEAF=1.00;MQ=60.00;QD=32.61;SOR=2.303	GT:AD:DP:GQ:PL	1/1:0,18:18:53:601,53,0	4	2.21743	2.14379	0.569937	1.94321	1.78065	3.98732
d225007	Ib	Diap2	FBgn0015247	-1	2R:15932884	1	2R	15932884	T	C	AG	TRUE	19	621.03	AC=2;AF=1.00;AN=2;DP=19;ExcessHet=3.0103;FS=0.000;MLEAC=2;MLEAF=1.00;MQ=60.00;QD=32.69;SOR=1.609	GT:AD:DP:GQ:PL	1/1:0,19:19:56:635,56,0	4	2.21743	2.14379	0.569937	1.94321	1.78065	3.98732
d225007	Ib	Diap2	FBgn0015247	-1	2R:15933013	1	2R	15933013	T	C	AG	TRUE	18	670.03	AC=2;AF=1.00;AN=2;DP=18;ExcessHet=3.0103;FS=0.000;MLEAC=2;MLEAF=1.00;MQ=60.00;QD=29.55;SOR=0.914	GT:AD:DP:GQ:PL	1/1:0,18:18:54:684,54,0	4	2.21743	2.14379	0.569937	1.94321	1.78065	3.98732
d225007	Ib	Got1	FBgn0001124	1	2R:16141326	0.983051	2R	16141326	A	G	AG	TRUE	59	2042.03	AC=2;AF=1.00;AN=2;BaseQRankSum=0.699;DP=59;ExcessHet=3.0103;FS=3.237;MLEAC=2;MLEAF=1.00;MQ=60.00;MQRankSum=0.000;QD=34.61;ReadPosRankSum=-0.919;SOR=0.442	GT:AD:DP:GQ:PL	1/1:1,58:59:99:2056,140,0	4	4.46672	4.50823	0.923616	5.08115	5.69811	3.98732
d225007	Ib	CG30116	FBgn0028496	-1	2R:18457250	1	2R	18457250	T	C	AG	TRUE	127	4552.03	AC=2;AF=1.00;AN=2;DP=127;ExcessHet=3.0103;FS=0.000;MLEAC=2;MLEAF=1.00;MQ=60.00;QD=27.53;SOR=1.117	GT:AD:DP:GQ:PL	1/1:0,127:127:99:4566,382,0	4	2.05783	0.888285	0.000330328	0.132941	0.0831169	3.98732
d225007	Ib	LSm1	FBgn0261067	-1	2R:21170134	0.686441	2R	21170134	T	C	AG	TRUE	118	2470.6	AC=1;AF=0.500;AN=2;BaseQRankSum=3.906;DP=118;ExcessHet=3.0103;FS=6.452;MLEAC=1;MLEAF=0.500;MQ=60.00;MQRankSum=0.000;QD=20.94;ReadPosRankSum=2.194;SOR=0.253	GT:AD:DP:GQ:PL	0/1:37,81:118:99:2478,0,909	4	2.38697	2.29325	0.794987	1.95004	2.11175	3.98732
d225007	Ib	CG14591	FBgn0033054	-1	2R:6037128	0.977169	2R	6037128	T	C	AG	TRUE	219	7350.03	AC=2;AF=1.00;AN=2;BaseQRankSum=1.439;DP=219;ExcessHet=3.0103;FS=11.386;MLEAC=2;MLEAF=1.00;MQ=60.00;MQRankSum=0.000;QD=33.56;ReadPosRankSum=-0.477;SOR=1.078	GT:AD:DP:GQ:PL	1/1:5,214:219:99:7364,475,0	4	4.47495	4.49171	0.904654	0.132465	0.0680559	3.98732
d225007	Ib	Vha16-1	FBgn0262736	-1	2R:6626171	0.551111	2R	6626171	T	C	AG	TRUE	225	4272.6	AC=1;AF=0.500;AN=2;BaseQRankSum=5.580;DP=225;ExcessHet=3.0103;FS=23.218;MLEAC=1;MLEAF=0.500;MQ=60.00;MQRankSum=0.000;QD=18.99;ReadPosRankSum=-1.660;SOR=2.038	GT:AD:DP:GQ:PL	0/1:101,124:225:99:4280,0,2858	4	8.42356	8.78145	0.297901	6.11325	6.08202	3.98732
d225007	Ib	CG32264	FBgn0052264	-1	3L:3717400	1	3L	3717400	T	C	AG	TRUE	28	1205.03	AC=2;AF=1.00;AN=2;DP=28;ExcessHet=3.0103;FS=0.000;MLEAC=2;MLEAF=1.00;MQ=60.00;QD=29.78;SOR=2.833	GT:AD:DP:GQ:PL	1/1:0,28:28:84:1219,84,0	4	3.4169	3.8072	0.084539	3.09462	2.70509	3.98732
d225007	Ib	CG1265	FBgn0035517	1	3L:4255132	0.180233	3L	4255132	A	G	AG	TRUE	172	470.6	AC=1;AF=0.500;AN=2;BaseQRankSum=-4.727;DP=172;ExcessHet=3.0103;FS=21.438;MLEAC=1;MLEAF=0.500;MQ=60.00;MQRankSum=0.000;QD=2.74;ReadPosRankSum=-4.529;SOR=2.502	GT:AD:DP:GQ:PL	0/1:141,31:172:99:478,0,4349	4	6.63685	6.24192	0.997965	7.15556	7.59341	3.98732
d225007	Ib	EndoA	FBgn0038659	1	3R:18907652	0.3125	3R	18907652	A	G	AG	TRUE	48	380.6	AC=1;AF=0.500;AN=2;BaseQRankSum=1.723;DP=48;ExcessHet=3.0103;FS=4.921;MLEAC=1;MLEAF=0.500;MQ=60.00;MQRankSum=0.000;QD=7.93;ReadPosRankSum=0.896;SOR=1.739	GT:AD:DP:GQ:PL	0/1:33,15:48:99:388,0,1001	4	4.7728	5.29408	0.154643	0.85352	0.843628	3.98732
d225007	Ib	EndoA	FBgn0038659	1	3R:18907675	0.304348	3R	18907675	A	G	AG	TRUE	46	393.6	AC=1;AF=0.500;AN=2;BaseQRankSum=5.309;DP=46;ExcessHet=3.0103;FS=1.552;MLEAC=1;MLEAF=0.500;MQ=60.00;MQRankSum=0.000;QD=8.56;ReadPosRankSum=0.036;SOR=1.234	GT:AD:DP:GQ:PL	0/1:32,14:46:99:401,0,915	4	4.7728	5.29408	0.154643	0.85352	0.843628	3.98732
d225007	Ib	EndoA	FBgn0038659	1	3R:18909164	1	3R	18909164	A	G	AG	TRUE	146	5096.03	AC=2;AF=1.00;AN=2;DP=146;ExcessHet=3.0103;FS=0.000;MLEAC=2;MLEAF=1.00;MQ=60.00;QD=34.90;SOR=1.675	GT:AD:DP:GQ:PL	1/1:0,146:146:99:5110,438,0	4	4.7728	5.29408	0.154643	0.85352	0.843628	3.98732
d225007	Ib	EndoA	FBgn0038659	1	3R:18910153	0.197674	3R	18910153	A	G	AG	TRUE	87	384.6	AC=1;AF=0.500;AN=2;BaseQRankSum=4.950;DP=87;ExcessHet=3.0103;FS=8.284;MLEAC=1;MLEAF=0.500;MQ=60.00;MQRankSum=0.000;QD=4.47;ReadPosRankSum=0.517;SOR=0.174	GT:AD:DP:GQ:PL	0/1:69,17:86:99:392,0,2167	4	4.7728	5.29408	0.154643	0.85352	0.843628	3.98732
d225007	Ib	Atpalpha	FBgn0002921	1	3R:20965039	0.129129	3R	20965039	A	G	AG	TRUE	666	1270.6	AC=1;AF=0.500;AN=2;BaseQRankSum=12.669;DP=666;ExcessHet=3.0103;FS=0.798;MLEAC=1;MLEAF=0.500;MQ=60.00;MQRankSum=0.000;QD=1.91;ReadPosRankSum=1.547;SOR=0.825	GT:AD:DP:GQ:PL	0/1:580,86:666:99:1278,0,16383	4	9.18942	9.08294	0.418439	4.40032	4.50151	3.98732
d225007	Ib	Cow	FBgn0039054	-1	3R:23112549	0.962025	3R	23112549	T	C	AG	TRUE	79	2666.03	AC=2;AF=1.00;AN=2;BaseQRankSum=2.170;DP=79;ExcessHet=3.0103;FS=0.000;MLEAC=2;MLEAF=1.00;MQ=60.00;MQRankSum=0.000;QD=33.75;ReadPosRankSum=0.129;SOR=0.435	GT:AD:DP:GQ:PL	1/1:3,76:79:99:2680,133,0	4	6.07048	6.14794	0.757327	0.0371922	0.0664222	3.98732
d225007	Ib	ATPsynCF6	FBgn0016119	-1	3R:23355357	0.40404	3R	23355357	T	C	AG	TRUE	198	2111.6	AC=1;AF=0.500;AN=2;BaseQRankSum=4.871;DP=198;ExcessHet=3.0103;FS=1.355;MLEAC=1;MLEAF=0.500;MQ=60.00;MQRankSum=0.000;QD=10.66;ReadPosRankSum=1.050;SOR=0.537	GT:AD:DP:GQ:PL	0/1:118,80:198:99:2119,0,3399	4	9.01907	8.99728	0.563116	8.34196	8.52202	3.98732
d225007	Ib	Sec13	FBgn0024509	1	3R:23357683	1	3R	23357683	A	G	AG	TRUE	58	2109.03	AC=2;AF=1.00;AN=2;DP=58;ExcessHet=3.0103;FS=0.000;MLEAC=2;MLEAF=1.00;MQ=60.00;QD=27.50;SOR=0.997	GT:AD:DP:GQ:PL	1/1:0,58:58:99:2123,173,0	4	3.99691	3.71929	0.929505	3.0338	3.04866	3.98732
d225007	Ib	Pli	FBgn0025574	-1	3R:23889787	1	3R	23889787	T	C	AG	TRUE	109	3749.03	AC=2;AF=1.00;AN=2;DP=109;ExcessHet=3.0103;FS=0.000;MLEAC=2;MLEAF=1.00;MQ=60.00;QD=34.39;SOR=1.002	GT:AD:DP:GQ:PL	1/1:0,109:109:99:3763,325,0	4	2.52098	3.01329	0.738494	2.01983	2.035	3.98732
d225007	Ib	Gdh	FBgn0001098	-1	3R:23936205	0.363248	3R	23936205	T	C	AG	TRUE	234	2425.6	AC=1;AF=0.500;AN=2;BaseQRankSum=10.618;DP=234;ExcessHet=3.0103;FS=12.335;MLEAC=1;MLEAF=0.500;MQ=60.00;MQRankSum=0.000;QD=10.37;ReadPosRankSum=0.701;SOR=1.401	GT:AD:DP:GQ:PL	0/1:149,85:234:99:2433,0,4193	4	6.73636	5.26871	0.00814535	4.37474	4.57326	3.98732
d225007	Ib	Ald1	FBgn0000064	-1	3R:26254245	0.568575	3R	26254245	T	C	AG	TRUE	761	13215.6	AC=1;AF=0.500;AN=2;BaseQRankSum=10.479;DP=761;ExcessHet=3.0103;FS=5.489;MLEAC=1;MLEAF=0.500;MQ=60.00;MQRankSum=0.000;QD=17.60;ReadPosRankSum=-0.662;SOR=1.111	GT:AD:DP:GQ:PL	0/1:324,427:751:99:13223,0,8810	4	11.4026	10.0568	0.0414265	10.8637	11.1339	3.98732
d225007	Ib	Ald1	FBgn0000064	-1	3R:26254381	0.563278	3R	26254381	T	C	AG	TRUE	964	16791.6	AC=1;AF=0.500;AN=2;BaseQRankSum=11.980;DP=964;ExcessHet=3.0103;FS=0.527;MLEAC=1;MLEAF=0.500;MQ=60.00;MQRankSum=0.000;QD=17.42;ReadPosRankSum=2.749;SOR=0.785	GT:AD:DP:GQ:PL	0/1:421,543:964:99:16799,0,11884	4	11.4026	10.0568	0.0414265	10.8637	11.1339	3.98732
d225007	Ib	TfIIA-L	FBgn0011289	1	3R:27255644	1	3R	27255644	A	G	AG	TRUE	133	5824.03	AC=2;AF=1.00;AN=2;DP=133;ExcessHet=3.0103;FS=0.000;MLEAC=2;MLEAF=1.00;MQ=60.00;QD=31.84;SOR=0.905	GT:AD:DP:GQ:PL	1/1:0,133:133:99:5838,406,0	4	2.98054	3.12474	0.877624	2.55085	2.08212	3.98732
d225007	Ib	Gp93	FBgn0039562	1	3R:27951705	1	3R	27951705	A	G	AG	TRUE	111	5341.03	AC=2;AF=1.00;AN=2;DP=111;ExcessHet=3.0103;FS=0.000;MLEAC=2;MLEAF=1.00;MQ=60.00;QD=27.71;SOR=4.466	GT:AD:DP:GQ:PL	1/1:0,111:111:99:5355,364,0	4	5.46458	5.53278	0.962357	2.74479	2.53149	3.98732
d225007	Ib	Cnx99A	FBgn0015622	-1	3R:29316804	1	3R	29316804	T	C	AG	TRUE	15	661.03	AC=2;AF=1.00;AN=2;DP=15;ExcessHet=3.0103;FS=0.000;MLEAC=2;MLEAF=1.00;MQ=60.00;QD=30.57;SOR=0.818	GT:AD:DP:GQ:PL	1/1:0,15:15:45:675,45,0	4	5.37514	5.28525	0.729489	2.58793	2.27049	3.98732
d225007	Ib	Cnx99A	FBgn0015622	-1	3R:29316843	1	3R	29316843	T	C	AG	TRUE	35	1651.03	AC=2;AF=1.00;AN=2;DP=35;ExcessHet=3.0103;FS=0.000;MLEAC=2;MLEAF=1.00;MQ=60.00;QD=26.14;SOR=3.321	GT:AD:DP:GQ:PL	1/1:0,35:35:99:1665,111,0	4	5.37514	5.28525	0.729489	2.58793	2.27049	3.98732
d225007	Ib	CG1907	FBgn0039674	1	3R:29620590	1	3R	29620590	A	G	AG	TRUE	34	1508.03	AC=2;AF=1.00;AN=2;DP=34;ExcessHet=3.0103;FS=0.000;MLEAC=2;MLEAF=1.00;MQ=60.00;QD=29.12;SOR=1.418	GT:AD:DP:GQ:PL	1/1:0,34:34:99:1522,102,0	4	2.96927	1.9565	0.114002	3.63121	3.23907	3.98732
d225007	Ib	kay	FBgn0001297	1	3R:29794088	1	3R	29794088	A	G	AG	TRUE	50	1772.03	AC=2;AF=1.00;AN=2;DP=50;ExcessHet=3.0103;FS=0.000;MLEAC=2;MLEAF=1.00;MQ=60.00;QD=24.76;SOR=5.590	GT:AD:DP:GQ:PL	1/1:0,50:50:99:1786,150,0	4	5.08707	5.90756	0.125239	4.66592	4.33526	3.98732
d225007	Ib	VhaAC45RP	FBgn0051030	-1	3R:30165949	0.902542	3R	30165949	T	C	AG	TRUE	236	8405.6	AC=1;AF=0.500;AN=2;BaseQRankSum=0.945;DP=236;ExcessHet=3.0103;FS=2.846;MLEAC=1;MLEAF=0.500;MQ=60.00;MQRankSum=0.000;QD=27.03;ReadPosRankSum=-0.100;SOR=0.847	GT:AD:DP:GQ:PL	0/1:23,213:236:99:8413,0,274	4	6.3392	6.42463	0.721484	0.410326	0.49666	3.98732
d225007	Ib	VhaAC45RP	FBgn0051030	-1	3R:30166167	0.855422	3R	30166167	T	C	AG	TRUE	166	6179.6	AC=1;AF=0.500;AN=2;BaseQRankSum=5.244;DP=166;ExcessHet=3.0103;FS=21.464;MLEAC=1;MLEAF=0.500;MQ=60.00;MQRankSum=0.000;QD=30.50;ReadPosRankSum=0.046;SOR=1.172	GT:AD:DP:GQ:PL	0/1:24,142:166:99:6187,0,545	4	6.3392	6.42463	0.721484	0.410326	0.49666	3.98732
d225007	Ib	VhaAC45RP	FBgn0051030	-1	3R:30166215	0.85443	3R	30166215	T	C	AG	TRUE	158	4403.6	AC=1;AF=0.500;AN=2;BaseQRankSum=4.855;DP=158;ExcessHet=3.0103;FS=12.785;MLEAC=1;MLEAF=0.500;MQ=60.00;MQRankSum=0.000;QD=27.87;ReadPosRankSum=1.529;SOR=1.846	GT:AD:DP:GQ:PL	0/1:23,135:158:99:4411,0,255	4	6.3392	6.42463	0.721484	0.410326	0.49666	3.98732
d225007	Ib	heca	FBgn0010113	1	3R:30371906	1	3R	30371906	A	G	AG	TRUE	93	3329.03	AC=2;AF=1.00;AN=2;DP=93;ExcessHet=3.0103;FS=0.000;MLEAC=2;MLEAF=1.00;MQ=60.00;QD=30.60;SOR=1.061	GT:AD:DP:GQ:PL	1/1:0,93:93:99:3343,278,0	4	3.65717	4.55384	0.0179205	1.24003	1.45922	3.98732
d225007	Ib	CycG	FBgn0039858	-1	3R:31601551	1	3R	31601551	T	C	AG	TRUE	44	1566.03	AC=2;AF=1.00;AN=2;DP=44;ExcessHet=3.0103;FS=0.000;MLEAC=2;MLEAF=1.00;MQ=60.00;QD=30.55;SOR=0.784	GT:AD:DP:GQ:PL	1/1:0,44:44:99:1580,132,0	4	6.749	7.09638	0.463947	5.43584	5.80647	3.98732
d225007	Ib	cpx	FBgn0041605	1	3R:4297504	0.571429	3R	4297504	A	G	AG	TRUE	203	3413.6	AC=1;AF=0.500;AN=2;BaseQRankSum=6.286;DP=203;ExcessHet=3.0103;FS=1.636;MLEAC=1;MLEAF=0.500;MQ=60.00;MQRankSum=0.000;QD=16.82;ReadPosRankSum=-0.579;SOR=0.506	GT:AD:DP:GQ:PL	0/1:87,116:203:99:3421,0,2558	4	7.90852	7.29727	0.637321	0.177459	0.228242	3.98732
d225007	Ib	cpx	FBgn0041605	1	3R:4297518	0.197995	3R	4297518	A	G	AG	TRUE	399	1802.6	AC=1;AF=0.500;AN=2;BaseQRankSum=6.415;DP=399;ExcessHet=3.0103;FS=0.575;MLEAC=1;MLEAF=0.500;MQ=60.00;MQRankSum=0.000;QD=4.52;ReadPosRankSum=1.227;SOR=0.740	GT:AD:DP:GQ:PL	0/1:320,79:399:99:1810,0,10324	4	7.90852	7.29727	0.637321	0.177459	0.228242	3.98732
d225007	Ib	cpx	FBgn0041605	1	3R:4301244	0.161074	3R	4301244	A	G	AG	TRUE	149	579.6	AC=1;AF=0.500;AN=2;BaseQRankSum=6.892;DP=149;ExcessHet=3.0103;FS=16.387;MLEAC=1;MLEAF=0.500;MQ=60.00;MQRankSum=0.000;QD=3.89;ReadPosRankSum=1.014;SOR=0.113	GT:AD:DP:GQ:PL	0/1:125,24:149:99:587,0,4989	4	7.90852	7.29727	0.637321	0.177459	0.228242	3.98732
d225007	Ib	cpx	FBgn0041605	1	3R:4301246	0.214286	3R	4301246	A	G	AG	TRUE	154	665.6	AC=1;AF=0.500;AN=2;BaseQRankSum=3.775;DP=154;ExcessHet=3.0103;FS=16.534;MLEAC=1;MLEAF=0.500;MQ=60.00;MQRankSum=0.000;QD=4.32;ReadPosRankSum=-0.020;SOR=0.120	GT:AD:DP:GQ:PL	0/1:121,33:154:99:673,0,3602	4	7.90852	7.29727	0.637321	0.177459	0.228242	3.98732
d225007	Ib	CG1090	FBgn0037238	1	3R:4365385	0.5375	3R	4365385	A	G	AG	TRUE	80	1217.6	AC=1;AF=0.500;AN=2;BaseQRankSum=2.158;DP=80;ExcessHet=3.0103;FS=4.323;MLEAC=1;MLEAF=0.500;MQ=60.00;MQRankSum=0.000;QD=15.22;ReadPosRankSum=-0.377;SOR=0.958	GT:AD:DP:GQ:PL	0/1:37,43:80:99:1225,0,952	4	4.19836	3.59903	0.876728	0.070259	0.0808403	3.98732
d225007	Ib	CG1090	FBgn0037238	1	3R:4365474	0.859155	3R	4365474	A	G	AG	TRUE	71	2307.6	AC=1;AF=0.500;AN=2;BaseQRankSum=2.681;DP=71;ExcessHet=3.0103;FS=7.243;MLEAC=1;MLEAF=0.500;MQ=60.00;MQRankSum=0.000;QD=32.50;ReadPosRankSum=0.881;SOR=0.485	GT:AD:DP:GQ:PL	0/1:10,61:71:99:2315,0,143	4	4.19836	3.59903	0.876728	0.070259	0.0808403	3.98732
d225007	Ib	Sec23	FBgn0262125	1	3R:5650231	1	3R	5650231	A	G	AG	TRUE	62	2136.03	AC=2;AF=1.00;AN=2;DP=62;ExcessHet=3.0103;FS=0.000;MLEAC=2;MLEAF=1.00;MQ=60.00;QD=34.45;SOR=3.647	GT:AD:DP:GQ:PL	1/1:0,62:62:99:2150,185,0	4	3.14569	3.83924	0.425454	2.08578	2.26094	3.98732
d225007	Ib	Sec23	FBgn0262125	1	3R:5650351	1	3R	5650351	A	G	AG	TRUE	47	1653.03	AC=2;AF=1.00;AN=2;DP=47;ExcessHet=3.0103;FS=0.000;MLEAC=2;MLEAF=1.00;MQ=60.00;QD=27.51;SOR=1.378	GT:AD:DP:GQ:PL	1/1:0,47:47:99:1667,140,0	4	3.14569	3.83924	0.425454	2.08578	2.26094	3.98732
d225007	Ib	cac	FBgn0263111	-1	X:11971853	1	X	11971853	T	C	AG	TRUE	24	823.03	AC=2;AF=1.00;AN=2;DP=24;ExcessHet=3.0103;FS=0.000;MLEAC=2;MLEAF=1.00;MQ=60.00;QD=34.29;SOR=1.270	GT:AD:DP:GQ:PL	1/1:0,24:24:72:837,72,0	4	4.16093	4.30898	0.905929	0.0597302	0.0545455	3.98732
d225007	Ib	cac	FBgn0263111	-1	X:11977538	1	X	11977538	T	C	AG	TRUE	12	444.02	AC=2;AF=1.00;AN=2;DP=12;ExcessHet=3.0103;FS=0.000;MLEAC=2;MLEAF=1.00;MQ=60.00;QD=34.24;SOR=1.022	GT:AD:DP:GQ:PL	1/1:0,12:12:36:458,36,0	4	4.16093	4.30898	0.905929	0.0597302	0.0545455	3.98732
d225007	Ib	Sh	FBgn0003380	-1	X:17926624	0.974026	X	17926624	T	C	AG	TRUE	77	2548.03	AC=2;AF=1.00;AN=2;BaseQRankSum=1.409;DP=77;ExcessHet=3.0103;FS=2.687;MLEAC=2;MLEAF=1.00;MQ=60.00;MQRankSum=0.000;QD=33.09;ReadPosRankSum=1.173;SOR=0.293	GT:AD:DP:GQ:PL	1/1:2,75:77:99:2562,163,0	4	5.78478	5.98037	0.885151	2.25586	1.88036	3.98732
d225007	Ib	Frq1	FBgn0030897	1	X:18170126	0.236111	X	18170126	A	G	AG	TRUE	288	1515.6	AC=1;AF=0.500;AN=2;BaseQRankSum=4.516;DP=288;ExcessHet=3.0103;FS=16.543;MLEAC=1;MLEAF=0.500;MQ=60.00;MQRankSum=0.000;QD=5.26;ReadPosRankSum=-1.178;SOR=1.781	GT:AD:DP:GQ:PL	0/1:220,68:288:99:1523,0,6773	4	6.87486	6.93852	0.801616	0.138615	0.135627	3.98732
d225008	Ib	IA-2	FBgn0031294	-1	2L:1010857	0.2	2L	1010857	T	C	AG	TRUE	135	522.6	AC=1;AF=0.500;AN=2;BaseQRankSum=4.722;DP=135;ExcessHet=3.0103;FS=0.000;MLEAC=1;MLEAF=0.500;MQ=60.00;MQRankSum=0.000;QD=3.87;ReadPosRankSum=1.157;SOR=0.611	GT:AD:DP:GQ:PL	0/1:108,27:135:99:530,0,3132	4	6.54402	7.83614	2.09102e-08	0.302821	0.331543	0
d225008	Ib	IA-2	FBgn0031294	-1	2L:1011285	0.103448	2L	1011285	T	C	AG	TRUE	117	72.6	AC=1;AF=0.500;AN=2;BaseQRankSum=3.906;DP=117;ExcessHet=3.0103;FS=1.179;MLEAC=1;MLEAF=0.500;MQ=60.00;MQRankSum=0.000;QD=0.63;ReadPosRankSum=1.073;SOR=0.462	GT:AD:DP:GQ:PL	0/1:104,12:116:80:80,0,2963	4	6.54402	7.83614	2.09102e-08	0.302821	0.331543	0
d225008	Ib	CG33303	FBgn0053303	-1	2L:10374727	0.740458	2L	10374727	T	C	AG	TRUE	131	3083.6	AC=1;AF=0.500;AN=2;BaseQRankSum=4.284;DP=131;ExcessHet=3.0103;FS=1.723;MLEAC=1;MLEAF=0.500;MQ=60.00;MQRankSum=0.000;QD=23.54;ReadPosRankSum=-0.011;SOR=0.931	GT:AD:DP:GQ:PL	0/1:34,97:131:99:3091,0,1124	4	4.82255	3.93282	0.505552	2.43097	2.84372	0
d225008	Ib	salr	FBgn0000287	1	2L:11373223	1	2L	11373223	A	G	AG	TRUE	83	2648.03	AC=2;AF=1.00;AN=2;DP=83;ExcessHet=3.0103;FS=0.000;MLEAC=2;MLEAF=1.00;MQ=60.00;QD=31.90;SOR=1.554	GT:AD:DP:GQ:PL	1/1:0,83:83:99:2662,247,0	4	3.36969	2.9991	0.771618	0.202178	0.0214256	0
d225008	Ib	Pex19	FBgn0032407	1	2L:12094295	0.528497	2L	12094295	A	G	AG	TRUE	193	3045.6	AC=1;AF=0.500;AN=2;BaseQRankSum=5.393;DP=193;ExcessHet=3.0103;FS=22.746;MLEAC=1;MLEAF=0.500;MQ=60.00;MQRankSum=0.000;QD=15.78;ReadPosRankSum=0.269;SOR=1.706	GT:AD:DP:GQ:PL	0/1:91,102:193:99:3053,0,2506	4	5.52679	4.58011	0.198542	3.35329	3.35545	0
d225008	Ib	ThrRS	FBgn0027081	1	2L:12106021	0.197452	2L	12106021	A	G	AG	TRUE	157	625.6	AC=1;AF=0.500;AN=2;BaseQRankSum=4.102;DP=157;ExcessHet=3.0103;FS=10.427;MLEAC=1;MLEAF=0.500;MQ=60.00;MQRankSum=0.000;QD=3.98;ReadPosRankSum=0.119;SOR=0.210	GT:AD:DP:GQ:PL	0/1:126,31:157:99:633,0,3513	4	5.11791	5.14664	0.914631	2.22626	2.05694	0
d225008	Ib	CG16974	FBgn0032479	-1	2L:13189312	0.585106	2L	13189312	T	C	AG	TRUE	283	4725.6	AC=1;AF=0.500;AN=2;BaseQRankSum=5.941;DP=283;ExcessHet=3.0103;FS=6.577;MLEAC=1;MLEAF=0.500;MQ=60.00;MQRankSum=0.000;QD=16.76;ReadPosRankSum=0.238;SOR=1.069	GT:AD:DP:GQ:PL	0/1:117,165:282:99:4733,0,3014	4	3.8107	3.63081	0.755289	1.61977	1.51626	0
d225008	Ib	Snx21	FBgn0031457	-1	2L:2764371	1	2L	2764371	T	C	AG	TRUE	33	1471.03	AC=2;AF=1.00;AN=2;DP=33;ExcessHet=3.0103;FS=0.000;MLEAC=2;MLEAF=1.00;MQ=60.00;QD=28.34;SOR=7.054	GT:AD:DP:GQ:PL	1/1:0,33:33:99:1485,99,0	4	3.71689	5.92923	0.00165457	2.46603	2.37167	0
d225008	Ib	fipi	FBgn0031627	-1	2L:4735173	0.506024	2L	4735173	T	C	AG	TRUE	83	1230.6	AC=1;AF=0.500;AN=2;BaseQRankSum=3.514;DP=83;ExcessHet=3.0103;FS=5.639;MLEAC=1;MLEAF=0.500;MQ=60.00;MQRankSum=0.000;QD=14.83;ReadPosRankSum=-0.608;SOR=0.487	GT:AD:DP:GQ:PL	0/1:41,42:83:99:1238,0,1143	4	5.70931	5.32823	0.250204	0.307762	0.421432	0
d225008	Ib	Msp300	FBgn0261836	1	2L:5206020	1	2L	5206020	A	G	AG	TRUE	98	3521.03	AC=2;AF=1.00;AN=2;DP=98;ExcessHet=3.0103;FS=0.000;MLEAC=2;MLEAF=1.00;MQ=60.00;QD=33.69;SOR=1.067	GT:AD:DP:GQ:PL	1/1:0,98:98:99:3535,294,0	4	5.66863	5.5634	0.880478	3.31906	3.19027	0
d225008	Ib	Nckx30C	FBgn0028704	-1	2L:9733349	1	2L	9733349	T	C	AG	TRUE	72	2491.03	AC=2;AF=1.00;AN=2;DP=72;ExcessHet=3.0103;FS=0.000;MLEAC=2;MLEAF=1.00;MQ=60.00;QD=34.60;SOR=1.148	GT:AD:DP:GQ:PL	1/1:0,72:72:99:2505,215,0	4	4.99389	4.09503	0.0412382	0.0832012	0.108464	0
d225008	Ib	14-3-3zeta	FBgn0004907	1	2R:10108800	0.18806	2R	10108800	A	G	AG	TRUE	335	1567.6	AC=1;AF=0.500;AN=2;BaseQRankSum=7.330;DP=335;ExcessHet=3.0103;FS=6.064;MLEAC=1;MLEAF=0.500;MQ=60.00;MQRankSum=0.000;QD=4.68;ReadPosRankSum=-1.789;SOR=1.104	GT:AD:DP:GQ:PL	0/1:272,63:335:99:1575,0,11409	4	10.0161	10.0638	0.920612	8.20641	7.91397	0
d225008	Ib	14-3-3zeta	FBgn0004907	1	2R:10108801	0.104348	2R	10108801	A	G	AG	TRUE	345	619.6	AC=1;AF=0.500;AN=2;BaseQRankSum=4.056;DP=345;ExcessHet=3.0103;FS=6.872;MLEAC=1;MLEAF=0.500;MQ=60.00;MQRankSum=0.000;QD=1.80;ReadPosRankSum=-2.519;SOR=1.294	GT:AD:DP:GQ:PL	0/1:309,36:345:99:627,0,13778	4	10.0161	10.0638	0.920612	8.20641	7.91397	0
d225008	Ib	14-3-3zeta	FBgn0004907	1	2R:10108802	0.122807	2R	10108802	A	G	AG	TRUE	342	664.6	AC=1;AF=0.500;AN=2;BaseQRankSum=6.120;DP=342;ExcessHet=3.0103;FS=2.997;MLEAC=1;MLEAF=0.500;MQ=60.00;MQRankSum=0.000;QD=1.94;ReadPosRankSum=-0.562;SOR=0.465	GT:AD:DP:GQ:PL	0/1:300,42:342:99:672,0,9870	4	10.0161	10.0638	0.920612	8.20641	7.91397	0
d225008	Ib	RpS15Ab	FBgn0033555	1	2R:10822219	0.101124	2R	10822219	A	G	AG	TRUE	89	157.6	AC=1;AF=0.500;AN=2;BaseQRankSum=1.120;DP=89;ExcessHet=3.0103;FS=35.228;MLEAC=1;MLEAF=0.500;MQ=60.00;MQRankSum=0.000;QD=1.77;ReadPosRankSum=0.500;SOR=1.968	GT:AD:DP:GQ:PL	0/1:80,9:89:99:165,0,4002	4	3.76529	3.1313	0.134754	5.69163	5.75158	0
d225008	Ib	RpS15Ab	FBgn0033555	1	2R:10822309	0.294118	2R	10822309	A	G	AG	TRUE	52	354.6	AC=1;AF=0.500;AN=2;BaseQRankSum=0.978;DP=52;ExcessHet=3.0103;FS=38.105;MLEAC=1;MLEAF=0.500;MQ=60.00;MQRankSum=0.000;QD=6.95;ReadPosRankSum=-2.101;SOR=3.088	GT:AD:DP:GQ:PL	0/1:36,15:51:99:362,0,963	4	3.76529	3.1313	0.134754	5.69163	5.75158	0
d225008	Ib	bbc	FBgn0033844	-1	2R:13486995	1	2R	13486995	T	C	AG	TRUE	79	2715.03	AC=2;AF=1.00;AN=2;DP=79;ExcessHet=3.0103;FS=0.000;MLEAC=2;MLEAF=1.00;MQ=60.00;QD=34.37;SOR=1.358	GT:AD:DP:GQ:PL	1/1:0,79:79:99:2729,237,0	4	2.43079	2.35712	0.725008	1.06293	1.18129	0
d225008	Ib	CG6329	FBgn0033872	1	2R:13832057	0.62908	2R	13832057	A	G	AG	TRUE	337	8420.6	AC=1;AF=0.500;AN=2;BaseQRankSum=2.483;DP=337;ExcessHet=3.0103;FS=4.573;MLEAC=1;MLEAF=0.500;MQ=60.00;MQRankSum=0.000;QD=24.99;ReadPosRankSum=-5.059;SOR=0.490	GT:AD:DP:GQ:PL	0/1:125,212:337:99:8428,0,4596	4	6.30782	5.19838	0.0246684	0.326178	0.229277	0
d225008	Ib	CG6329	FBgn0033872	1	2R:13832539	0.352381	2R	13832539	A	G	AG	TRUE	315	2906.6	AC=1;AF=0.500;AN=2;BaseQRankSum=9.099;DP=315;ExcessHet=3.0103;FS=2.548;MLEAC=1;MLEAF=0.500;MQ=60.00;MQRankSum=0.000;QD=9.23;ReadPosRankSum=1.499;SOR=0.660	GT:AD:DP:GQ:PL	0/1:204,111:315:99:2914,0,6993	4	6.30782	5.19838	0.0246684	0.326178	0.229277	0
d225008	Ib	ReepB	FBgn0033906	1	2R:14172781	0.38	2R	14172781	A	G	AG	TRUE	350	3488.6	AC=1;AF=0.500;AN=2;BaseQRankSum=5.431;DP=350;ExcessHet=3.0103;FS=1.029;MLEAC=1;MLEAF=0.500;MQ=60.00;MQRankSum=0.000;QD=9.97;ReadPosRankSum=-2.135;SOR=0.766	GT:AD:DP:GQ:PL	0/1:217,133:350:99:3496,0,6262	4	8.82339	8.47452	0.973655	7.40431	7.35215	0
d225008	Ib	ReepB	FBgn0033906	1	2R:14172820	0.439306	2R	14172820	A	G	AG	TRUE	346	4191.6	AC=1;AF=0.500;AN=2;BaseQRankSum=8.790;DP=346;ExcessHet=3.0103;FS=13.736;MLEAC=1;MLEAF=0.500;MQ=60.00;MQRankSum=0.000;QD=12.11;ReadPosRankSum=1.077;SOR=0.286	GT:AD:DP:GQ:PL	0/1:194,152:346:99:4199,0,4774	4	8.82339	8.47452	0.973655	7.40431	7.35215	0
d225008	Ib	CG8405	FBgn0034071	1	2R:16048343	1	2R	16048343	A	G	AG	TRUE	62	2845.03	AC=2;AF=1.00;AN=2;DP=62;ExcessHet=3.0103;FS=0.000;MLEAC=2;MLEAF=1.00;MQ=60.00;QD=34.84;SOR=0.899	GT:AD:DP:GQ:PL	1/1:0,62:62:99:2859,193,0	4	2.53302	2.65448	0.692047	1.04381	0.98824	0
d225008	Ib	Vha16-1	FBgn0262736	-1	2R:6626171	0.115207	2R	6626171	T	C	AG	TRUE	217	214.6	AC=1;AF=0.500;AN=2;BaseQRankSum=4.208;DP=217;ExcessHet=3.0103;FS=12.615;MLEAC=1;MLEAF=0.500;MQ=60.00;MQRankSum=0.000;QD=0.99;ReadPosRankSum=0.102;SOR=1.238	GT:AD:DP:GQ:PL	0/1:192,25:217:99:222,0,5990	4	8.42356	8.78145	0.297901	6.11325	6.08202	0
d225008	Ib	puml	FBgn0033226	1	2R:7813863	1	2R	7813863	A	G	AG	TRUE	71	2334.03	AC=2;AF=1.00;AN=2;DP=71;ExcessHet=3.0103;FS=0.000;MLEAC=2;MLEAF=1.00;MQ=60.00;QD=32.87;SOR=1.042	GT:AD:DP:GQ:PL	1/1:0,71:71:99:2348,213,0	4	2.96619	2.88029	0.815089	2.94272	2.98054	0
d225008	Ib	brp	FBgn0259246	1	2R:9540849	0.921875	2R	9540849	A	G	AG	TRUE	64	2355.67	AC=1;AF=0.500;AN=2;BaseQRankSum=-1.262;DP=64;ExcessHet=3.0103;FS=17.081;MLEAC=1;MLEAF=0.500;MQ=60.00;MQRankSum=0.000;QD=34.41;ReadPosRankSum=2.183;SOR=2.258	GT:AD:DP:GQ:PL	0/1:5,59:64:8:2363,0,8	4	4.91533	5.34215	0.729047	0.115732	0.0447217	0
d225008	Ib	Apt1	FBgn0042138	1	3L:11628408	0.769231	3L	11628408	A	G	AG	TRUE	39	1109.6	AC=1;AF=0.500;AN=2;BaseQRankSum=0.484;DP=39;ExcessHet=3.0103;FS=41.239;MLEAC=1;MLEAF=0.500;MQ=60.00;MQRankSum=0.000;QD=28.45;ReadPosRankSum=-1.825;SOR=4.539	GT:AD:DP:GQ:PL	0/1:9,30:39:99:1117,0,369	4	7.03967	7.08104	0.899746	3.39757	3.11187	0
d225008	Ib	hzg	FBgn0036556	-1	3L:15993527	1	3L	15993527	T	C	AG	TRUE	79	2630.03	AC=2;AF=1.00;AN=2;DP=79;ExcessHet=3.0103;FS=0.000;MLEAC=2;MLEAF=1.00;MQ=60.00;QD=33.72;SOR=0.798	GT:AD:DP:GQ:PL	1/1:0,78:78:99:2644,233,0	4	5.14397	4.93394	0.384067	2.83095	2.66627	0
d225008	Ib	Gbs-76A	FBgn0036862	-1	3L:19283264	1	3L	19283264	T	C	AG	TRUE	73	2443.03	AC=2;AF=1.00;AN=2;DP=73;ExcessHet=3.0103;FS=0.000;MLEAC=2;MLEAF=1.00;MQ=60.00;QD=33.47;SOR=1.426	GT:AD:DP:GQ:PL	1/1:0,73:73:99:2457,218,0	4	2.62452	1.40716	0.00204643	3.06808	2.85648	0
d225008	Ib	Shab	FBgn0262593	1	3L:2941312	1	3L	2941312	A	G	AG	TRUE	66	2328.03	AC=2;AF=1.00;AN=2;DP=66;ExcessHet=3.0103;FS=0.000;MLEAC=2;MLEAF=1.00;MQ=60.00;QD=30.58;SOR=0.886	GT:AD:DP:GQ:PL	1/1:0,66:66:99:2342,197,0	4	3.60169	2.82872	0.0568977	0.796233	0.656306	0
d225008	Ib	Shab	FBgn0262593	1	3L:2941364	1	3L	2941364	A	G	AG	TRUE	100	3494.03	AC=2;AF=1.00;AN=2;DP=100;ExcessHet=3.0103;FS=0.000;MLEAC=2;MLEAF=1.00;MQ=60.00;QD=34.94;SOR=1.167	GT:AD:DP:GQ:PL	1/1:0,100:100:99:3508,300,0	4	3.60169	2.82872	0.0568977	0.796233	0.656306	0
d225008	Ib	Shab	FBgn0262593	1	3L:2941426	1	3L	2941426	A	G	AG	TRUE	85	3038.03	AC=2;AF=1.00;AN=2;DP=85;ExcessHet=3.0103;FS=0.000;MLEAC=2;MLEAF=1.00;MQ=60.00;QD=33.47;SOR=1.781	GT:AD:DP:GQ:PL	1/1:0,85:85:99:3052,255,0	4	3.60169	2.82872	0.0568977	0.796233	0.656306	0
d225008	Ib	CG32264	FBgn0052264	-1	3L:3717400	0.191489	3L	3717400	T	C	AG	TRUE	94	474.6	AC=1;AF=0.500;AN=2;BaseQRankSum=-1.027;DP=94;ExcessHet=3.0103;FS=46.325;MLEAC=1;MLEAF=0.500;MQ=60.00;MQRankSum=0.000;QD=5.05;ReadPosRankSum=2.737;SOR=1.705	GT:AD:DP:GQ:PL	0/1:76,18:94:99:482,0,3282	4	3.4169	3.8072	0.084539	3.09462	2.70509	0
d225008	Ib	CG1265	FBgn0035517	1	3L:4255132	0.206897	3L	4255132	A	G	AG	TRUE	116	427.6	AC=1;AF=0.500;AN=2;BaseQRankSum=-5.697;DP=116;ExcessHet=3.0103;FS=30.246;MLEAC=1;MLEAF=0.500;MQ=60.00;MQRankSum=0.000;QD=3.69;ReadPosRankSum=-4.407;SOR=4.034	GT:AD:DP:GQ:PL	0/1:92,24:116:99:435,0,2833	4	6.63685	6.24192	0.997965	7.15556	7.59341	0
d225008	Ib	nAChRbeta1	FBgn0000038	1	3L:4429963	0.22973	3L	4429963	A	G	AG	TRUE	74	420.6	AC=1;AF=0.500;AN=2;BaseQRankSum=4.478;DP=74;ExcessHet=3.0103;FS=0.000;MLEAC=1;MLEAF=0.500;MQ=60.00;MQRankSum=0.000;QD=5.68;ReadPosRankSum=0.309;SOR=0.565	GT:AD:DP:GQ:PL	0/1:57,17:74:99:428,0,1704	4	6.35534	5.5438	0.188032	0.118617	0.0901246	0
d225008	Ib	Rbp	FBgn0262483	1	3R:15399446	0.973684	3R	15399446	A	G	AG	TRUE	38	1367.03	AC=2;AF=1.00;AN=2;BaseQRankSum=1.862;DP=38;ExcessHet=3.0103;FS=0.000;MLEAC=2;MLEAF=1.00;MQ=60.00;MQRankSum=0.000;QD=30.32;ReadPosRankSum=-1.053;SOR=0.963	GT:AD:DP:GQ:PL	1/1:1,37:38:99:1381,104,0	4	4.26678	5.40295	0.000371186	0.0963761	0.0364857	0
d225008	Ib	Rim	FBgn0053547	-1	3R:17881419	1	3R	17881419	T	C	AG	TRUE	101	4551.03	AC=2;AF=1.00;AN=2;DP=101;ExcessHet=3.0103;FS=0.000;MLEAC=2;MLEAF=1.00;MQ=60.00;QD=32.86;SOR=0.839	GT:AD:DP:GQ:PL	1/1:0,101:101:99:4565,307,0	4	4.71591	5.64873	0.00358477	0.0869337	0.149501	0
d225008	Ib	Rim	FBgn0053547	-1	3R:17881420	1	3R	17881420	T	C	AG	TRUE	102	4551.03	AC=2;AF=1.00;AN=2;DP=102;ExcessHet=3.0103;FS=0.000;MLEAC=2;MLEAF=1.00;MQ=60.00;QD=25.53;SOR=0.815	GT:AD:DP:GQ:PL	1/1:0,102:102:99:4565,307,0	4	4.71591	5.64873	0.00358477	0.0869337	0.149501	0
d225008	Ib	Cow	FBgn0039054	-1	3R:23112549	1	3R	23112549	T	C	AG	TRUE	45	1567.03	AC=2;AF=1.00;AN=2;DP=45;ExcessHet=3.0103;FS=0.000;MLEAC=2;MLEAF=1.00;MQ=60.00;QD=34.82;SOR=0.829	GT:AD:DP:GQ:PL	1/1:0,45:45:99:1581,135,0	4	6.07048	6.14794	0.757327	0.0371922	0.0664222	0
d225008	Ib	ATPsynCF6	FBgn0016119	-1	3R:23355357	0.369318	3R	23355357	T	C	AG	TRUE	176	1710.6	AC=1;AF=0.500;AN=2;BaseQRankSum=7.092;DP=176;ExcessHet=3.0103;FS=57.794;MLEAC=1;MLEAF=0.500;MQ=60.00;MQRankSum=0.000;QD=9.72;ReadPosRankSum=0.418;SOR=3.477	GT:AD:DP:GQ:PL	0/1:111,65:176:99:1718,0,3820	4	9.01907	8.99728	0.563116	8.34196	8.52202	0
d225008	Ib	Pli	FBgn0025574	-1	3R:23889787	1	3R	23889787	T	C	AG	TRUE	89	3050.03	AC=2;AF=1.00;AN=2;DP=89;ExcessHet=3.0103;FS=0.000;MLEAC=2;MLEAF=1.00;MQ=60.00;QD=34.27;SOR=1.338	GT:AD:DP:GQ:PL	1/1:0,89:89:99:3064,265,0	4	2.52098	3.01329	0.738494	2.01983	2.035	0
d225008	Ib	Gdh	FBgn0001098	-1	3R:23936205	0.836207	3R	23936205	T	C	AG	TRUE	116	3109.6	AC=1;AF=0.500;AN=2;BaseQRankSum=4.779;DP=116;ExcessHet=3.0103;FS=1.033;MLEAC=1;MLEAF=0.500;MQ=60.00;MQRankSum=0.000;QD=26.81;ReadPosRankSum=0.786;SOR=0.531	GT:AD:DP:GQ:PL	0/1:19,97:116:99:3117,0,276	4	6.73636	5.26871	0.00814535	4.37474	4.57326	0
d225008	Ib	slo	FBgn0003429	1	3R:24675663	0.84	3R	24675663	A	G	AG	TRUE	75	2108.6	AC=1;AF=0.500;AN=2;BaseQRankSum=3.956;DP=75;ExcessHet=3.0103;FS=4.572;MLEAC=1;MLEAF=0.500;MQ=60.00;MQRankSum=0.000;QD=28.11;ReadPosRankSum=3.398;SOR=0.133	GT:AD:DP:GQ:PL	0/1:12,63:75:99:2116,0,174	4	3.31874	4.49559	0.310436	1.1716	0.687207	0
d225008	Ib	Npl4	FBgn0039348	-1	3R:25623349	1	3R	25623349	T	C	AG	TRUE	55	1793.03	AC=2;AF=1.00;AN=2;DP=55;ExcessHet=3.0103;FS=0.000;MLEAC=2;MLEAF=1.00;MQ=60.00;QD=33.20;SOR=0.767	GT:AD:DP:GQ:PL	1/1:0,54:54:99:1807,161,0	4	3.48227	4.23072	0.219394	3.06536	2.90157	0
d225008	Ib	Ald1	FBgn0000064	-1	3R:26254245	0.48924	3R	26254245	T	C	AG	TRUE	698	9907.6	AC=1;AF=0.500;AN=2;BaseQRankSum=8.479;DP=698;ExcessHet=3.0103;FS=4.196;MLEAC=1;MLEAF=0.500;MQ=60.00;MQRankSum=0.000;QD=14.21;ReadPosRankSum=1.043;SOR=0.464	GT:AD:DP:GQ:PL	0/1:356,341:697:99:9915,0,9517	4	11.4026	10.0568	0.0414265	10.8637	11.1339	0
d225008	Ib	Ald1	FBgn0000064	-1	3R:26254381	0.509476	3R	26254381	T	C	AG	TRUE	897	13618.6	AC=1;AF=0.500;AN=2;BaseQRankSum=12.462;DP=897;ExcessHet=3.0103;FS=1.097;MLEAC=1;MLEAF=0.500;MQ=60.00;MQRankSum=0.000;QD=15.18;ReadPosRankSum=1.512;SOR=0.622	GT:AD:DP:GQ:PL	0/1:440,457:897:99:13626,0,12087	4	11.4026	10.0568	0.0414265	10.8637	11.1339	0
d225008	Ib	Pkc98E	FBgn0003093	1	3R:29046298	1	3R	29046298	A	G	AG	TRUE	171	7527.03	AC=2;AF=1.00;AN=2;DP=171;ExcessHet=3.0103;FS=0.000;MLEAC=2;MLEAF=1.00;MQ=60.00;QD=31.11;SOR=0.910	GT:AD:DP:GQ:PL	1/1:0,171:171:99:7541,517,0	4	4.42269	4.69937	0.833844	1.73884	1.5978	0
d225008	Ib	RpS8	FBgn0039713	1	3R:29863650	0.276151	3R	29863650	A	G	AG	TRUE	239	1570.6	AC=1;AF=0.500;AN=2;BaseQRankSum=3.205;DP=239;ExcessHet=3.0103;FS=18.289;MLEAC=1;MLEAF=0.500;MQ=60.00;MQRankSum=0.000;QD=6.57;ReadPosRankSum=-1.591;SOR=0.162	GT:AD:DP:GQ:PL	0/1:173,66:239:99:1578,0,5163	4	12.4079	12.3182	0.473228	11.7965	11.7074	0
d225008	Ib	VhaAC45RP	FBgn0051030	-1	3R:30165949	0.69898	3R	30165949	T	C	AG	TRUE	392	10230.6	AC=1;AF=0.500;AN=2;BaseQRankSum=1.460;DP=392;ExcessHet=3.0103;FS=4.224;MLEAC=1;MLEAF=0.500;MQ=60.00;MQRankSum=0.000;QD=26.10;ReadPosRankSum=-1.340;SOR=0.512	GT:AD:DP:GQ:PL	0/1:118,274:392:99:10238,0,3793	4	6.3392	6.42463	0.721484	0.410326	0.49666	0
d225008	Ib	VhaAC45RP	FBgn0051030	-1	3R:30166167	0.636735	3R	30166167	T	C	AG	TRUE	245	6510.6	AC=1;AF=0.500;AN=2;BaseQRankSum=9.966;DP=245;ExcessHet=3.0103;FS=1.603;MLEAC=1;MLEAF=0.500;MQ=60.00;MQRankSum=0.000;QD=26.57;ReadPosRankSum=-1.797;SOR=0.685	GT:AD:DP:GQ:PL	0/1:89,156:245:99:6518,0,3227	4	6.3392	6.42463	0.721484	0.410326	0.49666	0
d225008	Ib	VhaAC45RP	FBgn0051030	-1	3R:30166215	0.680982	3R	30166215	T	C	AG	TRUE	326	7150.6	AC=1;AF=0.500;AN=2;BaseQRankSum=11.093;DP=326;ExcessHet=3.0103;FS=22.495;MLEAC=1;MLEAF=0.500;MQ=60.00;MQRankSum=0.000;QD=21.93;ReadPosRankSum=2.241;SOR=1.629	GT:AD:DP:GQ:PL	0/1:104,222:326:99:7158,0,2260	4	6.3392	6.42463	0.721484	0.410326	0.49666	0
d225008	Ib	CG9743	FBgn0039756	-1	3R:30198612	0.265306	3R	30198612	T	C	AG	TRUE	98	525.6	AC=1;AF=0.500;AN=2;BaseQRankSum=0.504;DP=98;ExcessHet=3.0103;FS=0.000;MLEAC=1;MLEAF=0.500;MQ=60.00;MQRankSum=0.000;QD=5.36;ReadPosRankSum=-1.379;SOR=0.674	GT:AD:DP:GQ:PL	0/1:72,26:98:99:533,0,2109	4	2.09625	3.69448	0.234003	1.02718	1.08195	0
d225008	Ib	CycG	FBgn0039858	-1	3R:31601551	0.666667	3R	31601551	T	C	AG	TRUE	114	2323.6	AC=1;AF=0.500;AN=2;BaseQRankSum=5.222;DP=114;ExcessHet=3.0103;FS=3.614;MLEAC=1;MLEAF=0.500;MQ=60.00;MQRankSum=0.000;QD=20.38;ReadPosRankSum=0.482;SOR=0.845	GT:AD:DP:GQ:PL	0/1:38,76:114:99:2331,0,757	4	6.749	7.09638	0.463947	5.43584	5.80647	0
d225008	Ib	cpx	FBgn0041605	1	3R:4301148	0.883721	3R	4301148	A	G	AG	TRUE	43	1310.6	AC=1;AF=0.500;AN=2;BaseQRankSum=1.561;DP=43;ExcessHet=3.0103;FS=2.007;MLEAC=1;MLEAF=0.500;MQ=60.00;MQRankSum=0.000;QD=30.48;ReadPosRankSum=0.266;SOR=1.402	GT:AD:DP:GQ:PL	0/1:5,38:43:99:1318,0,205	4	7.90852	7.29727	0.637321	0.177459	0.228242	0
d225008	Ib	cpx	FBgn0041605	1	3R:4301212	0.809524	3R	4301212	A	G	AG	TRUE	42	1690.6	AC=1;AF=0.500;AN=2;BaseQRankSum=3.432;DP=42;ExcessHet=3.0103;FS=1.511;MLEAC=1;MLEAF=0.500;MQ=60.00;MQRankSum=0.000;QD=33.07;ReadPosRankSum=0.273;SOR=1.085	GT:AD:DP:GQ:PL	0/1:8,34:42:99:1698,0,610	4	7.90852	7.29727	0.637321	0.177459	0.228242	0
d225008	Ib	CG1090	FBgn0037238	1	3R:4365385	0.619718	3R	4365385	A	G	AG	TRUE	71	1742.6	AC=1;AF=0.500;AN=2;BaseQRankSum=0.405;DP=71;ExcessHet=3.0103;FS=3.291;MLEAC=1;MLEAF=0.500;MQ=60.00;MQRankSum=0.000;QD=24.54;ReadPosRankSum=0.059;SOR=0.731	GT:AD:DP:GQ:PL	0/1:27,44:71:99:1750,0,1000	4	4.19836	3.59903	0.876728	0.070259	0.0808403	0
d225008	Ib	CG1090	FBgn0037238	1	3R:4365474	0.324324	3R	4365474	A	G	AG	TRUE	74	609.6	AC=1;AF=0.500;AN=2;BaseQRankSum=4.469;DP=74;ExcessHet=3.0103;FS=0.000;MLEAC=1;MLEAF=0.500;MQ=60.00;MQRankSum=0.000;QD=8.24;ReadPosRankSum=1.043;SOR=0.775	GT:AD:DP:GQ:PL	0/1:50,24:74:99:617,0,1395	4	4.19836	3.59903	0.876728	0.070259	0.0808403	0
d225008	Ib	Vha26	FBgn0283535	1	3R:5594099	0.19697	3R	5594099	A	G	AG	TRUE	132	587.6	AC=1;AF=0.500;AN=2;BaseQRankSum=6.559;DP=132;ExcessHet=3.0103;FS=13.480;MLEAC=1;MLEAF=0.500;MQ=60.00;MQRankSum=0.000;QD=4.45;ReadPosRankSum=0.003;SOR=1.016	GT:AD:DP:GQ:PL	0/1:106,26:132:99:595,0,2871	4	7.31501	7.15393	0.778039	4.68759	4.94428	0
d225008	Ib	cac	FBgn0263111	-1	X:11971853	0.268657	X	11971853	T	C	AG	TRUE	67	377.6	AC=1;AF=0.500;AN=2;BaseQRankSum=1.850;DP=67;ExcessHet=3.0103;FS=5.490;MLEAC=1;MLEAF=0.500;MQ=60.00;MQRankSum=0.000;QD=5.64;ReadPosRankSum=-2.036;SOR=1.432	GT:AD:DP:GQ:PL	0/1:49,18:67:99:385,0,1417	4	4.16093	4.30898	0.905929	0.0597302	0.0545455	0
d225008	Ib	cac	FBgn0263111	-1	X:11977538	0.886792	X	11977538	T	C	AG	TRUE	54	1523.6	AC=1;AF=0.500;AN=2;BaseQRankSum=3.408;DP=54;ExcessHet=3.0103;FS=10.956;MLEAC=1;MLEAF=0.500;MQ=60.00;MQRankSum=0.000;QD=28.75;ReadPosRankSum=0.973;SOR=0.795	GT:AD:DP:GQ:PL	0/1:6,47:53:44:1531,0,44	4	4.16093	4.30898	0.905929	0.0597302	0.0545455	0
d225008	Ib	para	FBgn0285944	-1	X:16464719	1	X	16464719	T	C	AG	TRUE	69	2377.03	AC=2;AF=1.00;AN=2;DP=69;ExcessHet=3.0103;FS=0.000;MLEAC=2;MLEAF=1.00;MQ=60.00;QD=34.45;SOR=3.426	GT:AD:DP:GQ:PL	1/1:0,69:69:99:2391,207,0	4	4.84243	5.41949	0.0668684	0.0459099	0.108431	0
d225008	Ib	para	FBgn0285944	-1	X:16482682	0.611111	X	16482682	T	C	AG	TRUE	126	2933.6	AC=1;AF=0.500;AN=2;BaseQRankSum=1.041;DP=126;ExcessHet=3.0103;FS=0.000;MLEAC=1;MLEAF=0.500;MQ=60.00;MQRankSum=0.000;QD=23.28;ReadPosRankSum=-1.583;SOR=0.681	GT:AD:DP:GQ:PL	0/1:49,77:126:99:2941,0,3184	4	4.84243	5.41949	0.0668684	0.0459099	0.108431	0
d225008	Ib	Sh	FBgn0003380	-1	X:17926624	1	X	17926624	T	C	AG	TRUE	45	1430.03	AC=2;AF=1.00;AN=2;DP=45;ExcessHet=3.0103;FS=0.000;MLEAC=2;MLEAF=1.00;MQ=60.00;QD=31.78;SOR=3.865	GT:AD:DP:GQ:PL	1/1:0,45:45:99:1444,103,0	4	5.78478	5.98037	0.885151	2.25586	1.88036	0
d225008	Ib	Sh	FBgn0003380	-1	X:17930658	1	X	17930658	T	C	AG	TRUE	154	5674.03	AC=2;AF=1.00;AN=2;DP=154;ExcessHet=3.0103;FS=0.000;MLEAC=2;MLEAF=1.00;MQ=60.00;QD=33.85;SOR=1.270	GT:AD:DP:GQ:PL	1/1:0,154:154:99:5688,462,0	4	5.78478	5.98037	0.885151	2.25586	1.88036	0
d225008	Ib	Sh	FBgn0003380	-1	X:17950057	1	X	17950057	T	C	AG	TRUE	120	4018.03	AC=2;AF=1.00;AN=2;DP=120;ExcessHet=3.0103;FS=0.000;MLEAC=2;MLEAF=1.00;MQ=60.00;QD=33.48;SOR=2.187	GT:AD:DP:GQ:PL	1/1:0,120:120:99:4032,358,0	4	5.78478	5.98037	0.885151	2.25586	1.88036	0
d225008	Ib	Frq1	FBgn0030897	1	X:18170126	0.121495	X	18170126	A	G	AG	TRUE	321	356.6	AC=1;AF=0.500;AN=2;BaseQRankSum=4.309;DP=321;ExcessHet=3.0103;FS=4.656;MLEAC=1;MLEAF=0.500;MQ=60.00;MQRankSum=0.000;QD=1.11;ReadPosRankSum=-1.431;SOR=1.149	GT:AD:DP:GQ:PL	0/1:282,39:321:99:364,0,8428	4	6.87486	6.93852	0.801616	0.138615	0.135627	0
d225008	Ib	DIP1	FBgn0024807	-1	X:21629737	0.571429	X	21629737	T	C	AG	TRUE	56	965.6	AC=1;AF=0.500;AN=2;BaseQRankSum=2.495;DP=56;ExcessHet=3.0103;FS=5.523;MLEAC=1;MLEAF=0.500;MQ=60.00;MQRankSum=0.000;QD=17.24;ReadPosRankSum=0.108;SOR=1.207	GT:AD:DP:GQ:PL	0/1:24,32:56:99:973,0,858	4	4.22571	4.66995	0.917906	1.90808	1.68313	0
d225008	Ib	OtopLa	FBgn0259994	-1	X:5631035	0.818182	X	5631035	T	C	AG	TRUE	33	773.6	AC=1;AF=0.500;AN=2;BaseQRankSum=2.259;DP=33;ExcessHet=3.0103;FS=0.000;MLEAC=1;MLEAF=0.500;MQ=60.00;MQRankSum=0.000;QD=23.44;ReadPosRankSum=0.564;SOR=0.675	GT:AD:DP:GQ:PL	0/1:6,27:33:84:781,0,84	4	4.25873	3.80584	0.230532	0.129723	0.050683	0
d225009	Ib	nAChRalpha5	FBgn0028875	1	2L:14083516	1	2L	14083516	A	G	AG	TRUE	39	1777.03	AC=2;AF=1.00;AN=2;DP=39;ExcessHet=3.0103;FS=0.000;MLEAC=2;MLEAF=1.00;MQ=60.00;QD=34.37;SOR=1.730	GT:AD:DP:GQ:PL	1/1:0,39:39:99:1791,120,0	4	2.17311	2.13145	0.632364	0.0571794	0.030452	0
d225009	Ib	nAChRalpha5	FBgn0028875	1	2L:14083517	1	2L	14083517	A	G	AG	TRUE	40	1777.03	AC=2;AF=1.00;AN=2;DP=40;ExcessHet=3.0103;FS=0.000;MLEAC=2;MLEAF=1.00;MQ=60.00;QD=30.42;SOR=1.788	GT:AD:DP:GQ:PL	1/1:0,40:40:99:1791,120,0	4	2.17311	2.13145	0.632364	0.0571794	0.030452	0
d225009	Ib	nAChRalpha5	FBgn0028875	1	2L:14089204	1	2L	14089204	A	G	AG	TRUE	36	1356.03	AC=2;AF=1.00;AN=2;DP=36;ExcessHet=3.0103;FS=0.000;MLEAC=2;MLEAF=1.00;MQ=60.00;QD=28.14;SOR=1.949	GT:AD:DP:GQ:PL	1/1:0,36:36:99:1370,108,0	4	2.17311	2.13145	0.632364	0.0571794	0.030452	0
d225009	Ib	nAChRalpha5	FBgn0028875	1	2L:14089221	1	2L	14089221	A	G	AG	TRUE	44	1538.03	AC=2;AF=1.00;AN=2;DP=44;ExcessHet=3.0103;FS=0.000;MLEAC=2;MLEAF=1.00;MQ=60.00;QD=34.96;SOR=1.662	GT:AD:DP:GQ:PL	1/1:0,44:44:99:1552,132,0	4	2.17311	2.13145	0.632364	0.0571794	0.030452	0
d225009	Ib	nAChRalpha5	FBgn0028875	1	2L:14089236	1	2L	14089236	A	G	AG	TRUE	41	1768.03	AC=2;AF=1.00;AN=2;DP=41;ExcessHet=3.0103;FS=0.000;MLEAC=2;MLEAF=1.00;MQ=60.00;QD=32.74;SOR=0.843	GT:AD:DP:GQ:PL	1/1:0,41:41:99:1782,123,0	4	2.17311	2.13145	0.632364	0.0571794	0.030452	0
d225009	Ib	nAChRalpha5	FBgn0028875	1	2L:14089246	1	2L	14089246	A	G	AG	TRUE	37	1664.03	AC=2;AF=1.00;AN=2;DP=37;ExcessHet=3.0103;FS=0.000;MLEAC=2;MLEAF=1.00;MQ=60.00;QD=36.86;SOR=0.746	GT:AD:DP:GQ:PL	1/1:0,37:37:99:1678,114,0	4	2.17311	2.13145	0.632364	0.0571794	0.030452	0
d225009	Ib	nrv1	FBgn0015776	-1	2L:6779407	1	2L	6779407	T	C	AG	TRUE	28	982.03	AC=2;AF=1.00;AN=2;DP=28;ExcessHet=3.0103;FS=0.000;MLEAC=2;MLEAF=1.00;MQ=60.00;QD=32.25;SOR=0.836	GT:AD:DP:GQ:PL	1/1:0,28:28:84:996,84,0	4	2.94853	3.57548	0.556302	3.68812	3.55617	0
d225009	Ib	CG12942	FBgn0033569	1	2R:10897181	1	2R	10897181	A	G	AG	TRUE	37	1244.03	AC=2;AF=1.00;AN=2;DP=37;ExcessHet=3.0103;FS=0.000;MLEAC=2;MLEAF=1.00;MQ=60.00;QD=33.62;SOR=5.838	GT:AD:DP:GQ:PL	1/1:0,37:37:99:1258,109,0	4	0.399958	0.555292	0.715167	0.384429	0.464199	0
d225009	Ib	qvr	FBgn0260499	1	2R:11447607	1	2R	11447607	A	G	AG	TRUE	32	1138.03	AC=2;AF=1.00;AN=2;DP=32;ExcessHet=3.0103;FS=0.000;MLEAC=2;MLEAF=1.00;MQ=60.00;QD=30.12;SOR=0.693	GT:AD:DP:GQ:PL	1/1:0,32:32:96:1152,96,0	4	3.052	2.03341	0.0334999	0.269526	0.0914841	0
d225009	Ib	bbc	FBgn0033844	-1	2R:13494406	1	2R	13494406	T	C	AG	TRUE	30	1021.03	AC=2;AF=1.00;AN=2;DP=30;ExcessHet=3.0103;FS=0.000;MLEAC=2;MLEAF=1.00;MQ=60.00;QD=34.03;SOR=0.826	GT:AD:DP:GQ:PL	1/1:0,30:30:89:1035,89,0	4	2.43079	2.35712	0.725008	1.06293	1.18129	0
d225009	Ib	CG6329	FBgn0033872	1	2R:13832057	1	2R	13832057	A	G	AG	TRUE	46	2050.03	AC=2;AF=1.00;AN=2;DP=46;ExcessHet=3.0103;FS=0.000;MLEAC=2;MLEAF=1.00;MQ=60.00;QD=27.42;SOR=1.609	GT:AD:DP:GQ:PL	1/1:0,46:46:99:2064,138,0	4	6.30782	5.19838	0.0246684	0.326178	0.229277	0
d225009	Ib	CG6329	FBgn0033872	1	2R:13832539	1	2R	13832539	A	G	AG	TRUE	24	853.03	AC=2;AF=1.00;AN=2;DP=24;ExcessHet=3.0103;FS=0.000;MLEAC=2;MLEAF=1.00;MQ=60.00;QD=25.93;SOR=1.802	GT:AD:DP:GQ:PL	1/1:0,24:24:72:867,72,0	4	6.30782	5.19838	0.0246684	0.326178	0.229277	0
d225009	Ib	shot	FBgn0013733	-1	2R:13887556	1	2R	13887556	T	C	AG	TRUE	17	583.03	AC=2;AF=1.00;AN=2;DP=17;ExcessHet=3.0103;FS=0.000;MLEAC=2;MLEAF=1.00;MQ=60.00;QD=34.30;SOR=5.784	GT:AD:DP:GQ:PL	1/1:0,17:17:51:597,51,0	4	3.15927	3.81751	0.00164051	1.26596	1.43746	0
d225009	Ib	Prosap	FBgn0040752	-1	2R:14062651	1	2R	14062651	T	C	AG	TRUE	41	1396.03	AC=2;AF=1.00;AN=2;DP=41;ExcessHet=3.0103;FS=0.000;MLEAC=2;MLEAF=1.00;MQ=60.00;QD=34.90;SOR=1.151	GT:AD:DP:GQ:PL	1/1:0,40:40:99:1410,120,0	4	3.67189	3.09119	0.0790468	0.867644	0.923605	0
d225009	Ib	CG30116	FBgn0028496	-1	2R:18457250	1	2R	18457250	T	C	AG	TRUE	77	2764.03	AC=2;AF=1.00;AN=2;DP=77;ExcessHet=3.0103;FS=0.000;MLEAC=2;MLEAF=1.00;MQ=60.00;QD=28.71;SOR=0.719	GT:AD:DP:GQ:PL	1/1:0,77:77:99:2778,231,0	4	2.05783	0.888285	0.000330328	0.132941	0.0831169	0
d225009	Ib	CG14591	FBgn0033054	-1	2R:6037128	1	2R	6037128	T	C	AG	TRUE	56	2053.03	AC=2;AF=1.00;AN=2;DP=56;ExcessHet=3.0103;FS=0.000;MLEAC=2;MLEAF=1.00;MQ=60.00;QD=26.25;SOR=1.919	GT:AD:DP:GQ:PL	1/1:0,56:56:99:2067,168,0	4	4.47495	4.49171	0.904654	0.132465	0.0680559	0
d225009	Ib	Hr78	FBgn0015239	-1	3L:21494397	1	3L	21494397	T	C	AG	TRUE	21	931.03	AC=2;AF=1.00;AN=2;DP=21;ExcessHet=3.0103;FS=0.000;MLEAC=2;MLEAF=1.00;MQ=60.00;QD=38.06;SOR=3.816	GT:AD:DP:GQ:PL	1/1:0,21:21:63:945,63,0	4	2.37747	2.44977	0.97355	2.55783	2.44468	0
d225009	Ib	Shab	FBgn0262593	1	3L:2941216	1	3L	2941216	A	G	AG	TRUE	23	831.03	AC=2;AF=1.00;AN=2;DP=23;ExcessHet=3.0103;FS=0.000;MLEAC=2;MLEAF=1.00;MQ=60.00;QD=22.93;SOR=0.776	GT:AD:DP:GQ:PL	1/1:0,23:23:69:845,69,0	4	3.60169	2.82872	0.0568977	0.796233	0.656306	0
d225009	Ib	Shab	FBgn0262593	1	3L:2941364	1	3L	2941364	A	G	AG	TRUE	24	887.03	AC=2;AF=1.00;AN=2;DP=24;ExcessHet=3.0103;FS=0.000;MLEAC=2;MLEAF=1.00;MQ=60.00;QD=33.40;SOR=0.859	GT:AD:DP:GQ:PL	1/1:0,24:24:72:901,72,0	4	3.60169	2.82872	0.0568977	0.796233	0.656306	0
d225009	Ib	Shab	FBgn0262593	1	3L:2941426	1	3L	2941426	A	G	AG	TRUE	12	425.02	AC=2;AF=1.00;AN=2;DP=12;ExcessHet=3.0103;FS=0.000;MLEAC=2;MLEAF=1.00;MQ=60.00;QD=32.84;SOR=1.981	GT:AD:DP:GQ:PL	1/1:0,12:12:36:439,36,0	4	3.60169	2.82872	0.0568977	0.796233	0.656306	0
d225009	Ib	nAChRbeta1	FBgn0000038	1	3L:4429963	0.730159	3L	4429963	A	G	AG	TRUE	63	1505.6	AC=1;AF=0.500;AN=2;BaseQRankSum=4.459;DP=63;ExcessHet=3.0103;FS=75.428;MLEAC=1;MLEAF=0.500;MQ=60.00;MQRankSum=0.000;QD=23.90;ReadPosRankSum=3.529;SOR=2.933	GT:AD:DP:GQ:PL	0/1:17,46:63:99:1513,0,387	4	6.35534	5.5438	0.188032	0.118617	0.0901246	0
d225009	Ib	nAChRbeta1	FBgn0000038	1	3L:4432487	1	3L	4432487	A	G	AG	TRUE	37	1301.03	AC=2;AF=1.00;AN=2;DP=37;ExcessHet=3.0103;FS=0.000;MLEAC=2;MLEAF=1.00;MQ=60.00;QD=26.92;SOR=2.242	GT:AD:DP:GQ:PL	1/1:0,37:37:99:1315,111,0	4	6.35534	5.5438	0.188032	0.118617	0.0901246	0
d225009	Ib	Rim	FBgn0053547	-1	3R:17881419	1	3R	17881419	T	C	AG	TRUE	76	3532.03	AC=2;AF=1.00;AN=2;DP=76;ExcessHet=3.0103;FS=0.000;MLEAC=2;MLEAF=1.00;MQ=60.00;QD=30.14;SOR=1.121	GT:AD:DP:GQ:PL	1/1:0,76:76:99:3546,238,0	4	4.71591	5.64873	0.00358477	0.0869337	0.149501	0
d225009	Ib	Rim	FBgn0053547	-1	3R:17881420	1	3R	17881420	T	C	AG	TRUE	78	3532.03	AC=2;AF=1.00;AN=2;DP=78;ExcessHet=3.0103;FS=0.000;MLEAC=2;MLEAF=1.00;MQ=60.00;QD=25.66;SOR=1.252	GT:AD:DP:GQ:PL	1/1:0,78:78:99:3546,238,0	4	4.71591	5.64873	0.00358477	0.0869337	0.149501	0
d225009	Ib	EndoA	FBgn0038659	1	3R:18907652	1	3R	18907652	A	G	AG	TRUE	16	568.03	AC=2;AF=1.00;AN=2;DP=16;ExcessHet=3.0103;FS=0.000;MLEAC=2;MLEAF=1.00;MQ=60.00;QD=28.26;SOR=1.609	GT:AD:DP:GQ:PL	1/1:0,16:16:48:582,48,0	4	4.7728	5.29408	0.154643	0.85352	0.843628	0
d225009	Ib	EndoA	FBgn0038659	1	3R:18907799	1	3R	18907799	A	G	AG	TRUE	20	668.03	AC=2;AF=1.00;AN=2;DP=20;ExcessHet=3.0103;FS=0.000;MLEAC=2;MLEAF=1.00;MQ=60.00;QD=33.40;SOR=0.892	GT:AD:DP:GQ:PL	1/1:0,20:20:60:682,60,0	4	4.7728	5.29408	0.154643	0.85352	0.843628	0
d225009	Ib	Xrp1	FBgn0261113	1	3R:18918354	0.93662	3R	18918354	A	G	AG	TRUE	142	4151.03	AC=2;AF=1.00;AN=2;BaseQRankSum=-0.065;DP=142;ExcessHet=3.0103;FS=5.324;MLEAC=2;MLEAF=1.00;MQ=60.00;MQRankSum=0.000;QD=29.23;ReadPosRankSum=-0.076;SOR=2.172	GT:AD:DP:GQ:PL	1/1:9,133:142:99:4165,106,0	4	6.93525	6.63308	0.99582	5.49922	5.49918	0
d225009	Ib	Atpalpha	FBgn0002921	1	3R:20964328	0.235772	3R	20964328	A	G	AG	TRUE	123	540.6	AC=1;AF=0.500;AN=2;BaseQRankSum=-0.558;DP=123;ExcessHet=3.0103;FS=0.799;MLEAC=1;MLEAF=0.500;MQ=60.00;MQRankSum=0.000;QD=4.40;ReadPosRankSum=-0.991;SOR=0.559	GT:AD:DP:GQ:PL	0/1:94,29:123:99:548,0,2915	4	9.18942	9.08294	0.418439	4.40032	4.50151	0
d225009	Ib	ATPsynCF6	FBgn0016119	-1	3R:23355357	1	3R	23355357	T	C	AG	TRUE	30	1274.03	AC=2;AF=1.00;AN=2;DP=30;ExcessHet=3.0103;FS=0.000;MLEAC=2;MLEAF=1.00;MQ=60.00;QD=26.88;SOR=2.621	GT:AD:DP:GQ:PL	1/1:0,30:30:90:1288,90,0	4	9.01907	8.99728	0.563116	8.34196	8.52202	0
d225009	Ib	Pli	FBgn0025574	-1	3R:23889787	0.202797	3R	23889787	T	C	AG	TRUE	144	576.6	AC=1;AF=0.500;AN=2;BaseQRankSum=1.573;DP=144;ExcessHet=3.0103;FS=6.892;MLEAC=1;MLEAF=0.500;MQ=60.00;MQRankSum=0.000;QD=4.03;ReadPosRankSum=-0.008;SOR=0.293	GT:AD:DP:GQ:PL	0/1:114,29:143:99:584,0,3563	4	2.52098	3.01329	0.738494	2.01983	2.035	0
d225009	Ib	slo	FBgn0003429	1	3R:24675663	0.290909	3R	24675663	A	G	AG	TRUE	55	441.6	AC=1;AF=0.500;AN=2;BaseQRankSum=4.850;DP=55;ExcessHet=3.0103;FS=2.432;MLEAC=1;MLEAF=0.500;MQ=60.00;MQRankSum=0.000;QD=8.03;ReadPosRankSum=-1.599;SOR=0.145	GT:AD:DP:GQ:PL	0/1:39,16:55:99:449,0,1167	4	3.31874	4.49559	0.310436	1.1716	0.687207	0
d225009	Ib	Ald1	FBgn0000064	-1	3R:26254245	0.822511	3R	26254245	T	C	AG	TRUE	231	5901.6	AC=1;AF=0.500;AN=2;BaseQRankSum=5.634;DP=231;ExcessHet=3.0103;FS=3.330;MLEAC=1;MLEAF=0.500;MQ=60.00;MQRankSum=0.000;QD=25.55;ReadPosRankSum=0.457;SOR=0.452	GT:AD:DP:GQ:PL	0/1:41,190:231:99:5909,0,992	4	11.4026	10.0568	0.0414265	10.8637	11.1339	0
d225009	Ib	Ald1	FBgn0000064	-1	3R:26254381	0.800604	3R	26254381	T	C	AG	TRUE	332	8178.6	AC=1;AF=0.500;AN=2;BaseQRankSum=4.723;DP=332;ExcessHet=3.0103;FS=45.936;MLEAC=1;MLEAF=0.500;MQ=60.00;MQRankSum=0.000;QD=24.71;ReadPosRankSum=1.753;SOR=2.518	GT:AD:DP:GQ:PL	0/1:66,265:331:99:8186,0,1277	4	11.4026	10.0568	0.0414265	10.8637	11.1339	0
d225009	Ib	Hmu	FBgn0015737	1	3R:27290230	0.668675	3R	27290230	A	G	AG	TRUE	166	3525.6	AC=1;AF=0.500;AN=2;BaseQRankSum=7.826;DP=166;ExcessHet=3.0103;FS=4.954;MLEAC=1;MLEAF=0.500;MQ=60.00;MQRankSum=0.000;QD=21.24;ReadPosRankSum=0.934;SOR=1.066	GT:AD:DP:GQ:PL	0/1:55,111:166:99:3533,0,1245	4	5.87173	5.77395	0.390105	2.59234	2.73469	0
d225009	Ib	Ptp99A	FBgn0004369	1	3R:29483303	0.940299	3R	29483303	A	G	AG	TRUE	67	2095.03	AC=2;AF=1.00;AN=2;BaseQRankSum=1.625;DP=67;ExcessHet=3.0103;FS=23.988;MLEAC=2;MLEAF=1.00;MQ=60.00;MQRankSum=0.000;QD=31.27;ReadPosRankSum=-2.253;SOR=2.412	GT:AD:DP:GQ:PL	1/1:4,63:67:55:2109,55,0	4	4.34922	4.16541	0.576197	1.29803	1.03192	0
d225009	Ib	CG1907	FBgn0039674	1	3R:29620590	0.727273	3R	29620590	A	G	AG	TRUE	33	969.6	AC=1;AF=0.500;AN=2;BaseQRankSum=3.613;DP=33;ExcessHet=3.0103;FS=1.864;MLEAC=1;MLEAF=0.500;MQ=60.00;MQRankSum=0.000;QD=29.38;ReadPosRankSum=-0.871;SOR=1.532	GT:AD:DP:GQ:PL	0/1:9,24:33:99:977,0,306	4	2.96927	1.9565	0.114002	3.63121	3.23907	0
d225009	Ib	VhaAC45RP	FBgn0051030	-1	3R:30165949	0.672414	3R	30165949	T	C	AG	TRUE	58	1459.6	AC=1;AF=0.500;AN=2;BaseQRankSum=1.906;DP=58;ExcessHet=3.0103;FS=19.034;MLEAC=1;MLEAF=0.500;MQ=60.00;MQRankSum=0.000;QD=25.17;ReadPosRankSum=-0.159;SOR=0.033	GT:AD:DP:GQ:PL	0/1:19,39:58:99:1467,0,626	4	6.3392	6.42463	0.721484	0.410326	0.49666	0
d225009	Ib	VhaAC45RP	FBgn0051030	-1	3R:30166167	0.541667	3R	30166167	T	C	AG	TRUE	48	1016.6	AC=1;AF=0.500;AN=2;BaseQRankSum=5.456;DP=48;ExcessHet=3.0103;FS=6.040;MLEAC=1;MLEAF=0.500;MQ=60.00;MQRankSum=0.000;QD=21.18;ReadPosRankSum=-2.118;SOR=0.223	GT:AD:DP:GQ:PL	0/1:22,26:48:99:1024,0,872	4	6.3392	6.42463	0.721484	0.410326	0.49666	0
d225009	Ib	VhaAC45RP	FBgn0051030	-1	3R:30166215	0.646154	3R	30166215	T	C	AG	TRUE	66	1291.6	AC=1;AF=0.500;AN=2;BaseQRankSum=4.657;DP=66;ExcessHet=3.0103;FS=3.973;MLEAC=1;MLEAF=0.500;MQ=60.00;MQRankSum=0.000;QD=19.87;ReadPosRankSum=1.857;SOR=0.317	GT:AD:DP:GQ:PL	0/1:23,42:65:99:1299,0,547	4	6.3392	6.42463	0.721484	0.410326	0.49666	0
d225009	Ib	CG9743	FBgn0039756	-1	3R:30198612	1	3R	30198612	T	C	AG	TRUE	15	527.03	AC=2;AF=1.00;AN=2;DP=15;ExcessHet=3.0103;FS=0.000;MLEAC=2;MLEAF=1.00;MQ=60.00;QD=27.81;SOR=0.818	GT:AD:DP:GQ:PL	1/1:0,15:15:45:541,45,0	4	2.09625	3.69448	0.234003	1.02718	1.08195	0
d225009	Ib	CycG	FBgn0039858	-1	3R:31601551	0.459459	3R	31601551	T	C	AG	TRUE	37	477.6	AC=1;AF=0.500;AN=2;BaseQRankSum=1.923;DP=37;ExcessHet=3.0103;FS=0.000;MLEAC=1;MLEAF=0.500;MQ=60.00;MQRankSum=0.000;QD=12.91;ReadPosRankSum=-0.657;SOR=0.804	GT:AD:DP:GQ:PL	0/1:20,17:37:99:485,0,551	4	6.749	7.09638	0.463947	5.43584	5.80647	0
d225009	Ib	cpx	FBgn0041605	1	3R:4297504	0.307692	3R	4297504	A	G	AG	TRUE	65	501.6	AC=1;AF=0.500;AN=2;BaseQRankSum=3.708;DP=65;ExcessHet=3.0103;FS=1.490;MLEAC=1;MLEAF=0.500;MQ=60.00;MQRankSum=0.000;QD=7.72;ReadPosRankSum=0.142;SOR=0.989	GT:AD:DP:GQ:PL	0/1:45,20:65:99:509,0,1388	4	7.90852	7.29727	0.637321	0.177459	0.228242	0
d225009	Ib	cpx	FBgn0041605	1	3R:4301140	0.441176	3R	4301140	A	G	AG	TRUE	68	1227.6	AC=1;AF=0.500;AN=2;BaseQRankSum=3.820;DP=68;ExcessHet=3.0103;FS=1.630;MLEAC=1;MLEAF=0.500;MQ=60.00;MQRankSum=0.000;QD=18.05;ReadPosRankSum=0.025;SOR=1.067	GT:AD:DP:GQ:PL	0/1:38,30:68:99:1235,0,1496	4	7.90852	7.29727	0.637321	0.177459	0.228242	0
d225009	Ib	cpx	FBgn0041605	1	3R:4301142	0.449275	3R	4301142	A	G	AG	TRUE	69	1389.6	AC=1;AF=0.500;AN=2;BaseQRankSum=4.261;DP=69;ExcessHet=3.0103;FS=1.651;MLEAC=1;MLEAF=0.500;MQ=60.00;MQRankSum=0.000;QD=20.14;ReadPosRankSum=-0.012;SOR=1.112	GT:AD:DP:GQ:PL	0/1:38,31:69:99:1397,0,1568	4	7.90852	7.29727	0.637321	0.177459	0.228242	0
d225009	Ib	cpx	FBgn0041605	1	3R:4301200	0.426471	3R	4301200	A	G	AG	TRUE	68	1316.6	AC=1;AF=0.500;AN=2;BaseQRankSum=5.273;DP=68;ExcessHet=3.0103;FS=3.415;MLEAC=1;MLEAF=0.500;MQ=60.00;MQRankSum=0.000;QD=19.36;ReadPosRankSum=-1.188;SOR=1.243	GT:AD:DP:GQ:PL	0/1:39,29:68:99:1324,0,1611	4	7.90852	7.29727	0.637321	0.177459	0.228242	0
d225009	Ib	cpx	FBgn0041605	1	3R:4301212	0.435484	3R	4301212	A	G	AG	TRUE	62	1115.6	AC=1;AF=0.500;AN=2;BaseQRankSum=4.578;DP=62;ExcessHet=3.0103;FS=0.962;MLEAC=1;MLEAF=0.500;MQ=60.00;MQRankSum=0.000;QD=17.99;ReadPosRankSum=-0.292;SOR=0.858	GT:AD:DP:GQ:PL	0/1:35,27:62:99:1123,0,1500	4	7.90852	7.29727	0.637321	0.177459	0.228242	0
d225009	Ib	cpx	FBgn0041605	1	3R:4301244	0.306122	3R	4301244	A	G	AG	TRUE	49	516.6	AC=1;AF=0.500;AN=2;BaseQRankSum=3.382;DP=49;ExcessHet=3.0103;FS=1.269;MLEAC=1;MLEAF=0.500;MQ=60.00;MQRankSum=0.000;QD=10.54;ReadPosRankSum=-1.082;SOR=0.412	GT:AD:DP:GQ:PL	0/1:34,15:49:99:524,0,1424	4	7.90852	7.29727	0.637321	0.177459	0.228242	0
d225009	Ib	cpx	FBgn0041605	1	3R:4301246	0.244898	3R	4301246	A	G	AG	TRUE	49	372.6	AC=1;AF=0.500;AN=2;BaseQRankSum=4.945;DP=49;ExcessHet=3.0103;FS=0.000;MLEAC=1;MLEAF=0.500;MQ=60.00;MQRankSum=0.000;QD=7.60;ReadPosRankSum=-0.164;SOR=0.701	GT:AD:DP:GQ:PL	0/1:37,12:49:99:380,0,1685	4	7.90852	7.29727	0.637321	0.177459	0.228242	0
d225009	Ib	cpx	FBgn0041605	1	3R:4301258	0.389831	3R	4301258	A	G	AG	TRUE	59	891.6	AC=1;AF=0.500;AN=2;BaseQRankSum=3.928;DP=59;ExcessHet=3.0103;FS=4.403;MLEAC=1;MLEAF=0.500;MQ=60.00;MQRankSum=0.000;QD=15.11;ReadPosRankSum=3.261;SOR=0.278	GT:AD:DP:GQ:PL	0/1:36,23:59:99:899,0,1337	4	7.90852	7.29727	0.637321	0.177459	0.228242	0
d225009	Ib	Sh	FBgn0003380	-1	X:17930658	1	X	17930658	T	C	AG	TRUE	215	7870.03	AC=2;AF=1.00;AN=2;DP=215;ExcessHet=3.0103;FS=0.000;MLEAC=2;MLEAF=1.00;MQ=60.00;QD=32.33;SOR=2.748	GT:AD:DP:GQ:PL	1/1:0,215:215:99:7884,643,0	4	5.78478	5.98037	0.885151	2.25586	1.88036	0
d225009	Ib	Frq1	FBgn0030897	1	X:18170126	0.869231	X	18170126	A	G	AG	TRUE	260	7006.6	AC=1;AF=0.500;AN=2;BaseQRankSum=4.929;DP=260;ExcessHet=3.0103;FS=5.867;MLEAC=1;MLEAF=0.500;MQ=60.00;MQRankSum=0.000;QD=26.95;ReadPosRankSum=1.756;SOR=0.332	GT:AD:DP:GQ:PL	0/1:34,226:260:99:7014,0,337	4	6.87486	6.93852	0.801616	0.138615	0.135627	0
d225009	Ib	DIP1	FBgn0024807	-1	X:21629725	1	X	21629725	T	C	AG	TRUE	41	1848.03	AC=2;AF=1.00;AN=2;DP=41;ExcessHet=3.0103;FS=0.000;MLEAC=2;MLEAF=1.00;MQ=60.00;QD=30.53;SOR=1.501	GT:AD:DP:GQ:PL	1/1:0,41:41:99:1862,129,0	4	4.22571	4.66995	0.917906	1.90808	1.68313	0
d225009	Ib	DIP1	FBgn0024807	-1	X:21629727	0.272727	X	21629727	T	C	AG	TRUE	44	338.6	AC=1;AF=0.500;AN=2;BaseQRankSum=0.566;DP=44;ExcessHet=3.0103;FS=3.010;MLEAC=1;MLEAF=0.500;MQ=60.00;MQRankSum=0.000;QD=7.70;ReadPosRankSum=0.172;SOR=1.222	GT:AD:DP:GQ:PL	0/1:32,12:44:99:346,0,1292	4	4.22571	4.66995	0.917906	1.90808	1.68313	0
d225010	Ib	CG33303	FBgn0053303	-1	2L:10374727	0.211765	2L	10374727	T	C	AG	TRUE	85	353.6	AC=1;AF=0.500;AN=2;BaseQRankSum=4.223;DP=85;ExcessHet=3.0103;FS=1.083;MLEAC=1;MLEAF=0.500;MQ=60.00;MQRankSum=0.000;QD=4.16;ReadPosRankSum=0.205;SOR=0.507	GT:AD:DP:GQ:PL	0/1:67,18:85:99:361,0,2021	4	4.82255	3.93282	0.505552	2.43097	2.84372	4.49249
d225010	Ib	CG33303	FBgn0053303	-1	2L:10374859	0.25	2L	10374859	T	C	AG	TRUE	80	376.6	AC=1;AF=0.500;AN=2;BaseQRankSum=2.096;DP=80;ExcessHet=3.0103;FS=0.987;MLEAC=1;MLEAF=0.500;MQ=60.00;MQRankSum=0.000;QD=4.71;ReadPosRankSum=1.367;SOR=0.841	GT:AD:DP:GQ:PL	0/1:60,20:80:99:384,0,1760	4	4.82255	3.93282	0.505552	2.43097	2.84372	4.49249
d225010	Ib	CG31705	FBgn0028490	-1	2L:11523838	0.954545	2L	11523838	T	C	AG	TRUE	22	676.02	AC=2;AF=1.00;AN=2;BaseQRankSum=1.133;DP=22;ExcessHet=3.0103;FS=3.424;MLEAC=2;MLEAF=1.00;MQ=60.00;MQRankSum=0.000;QD=30.73;ReadPosRankSum=1.625;SOR=0.663	GT:AD:DP:GQ:PL	1/1:1,21:22:34:690,34,0	4	4.03693	4.29753	0.767202	4.24038	4.53465	4.49249
d225010	Ib	ThrRS	FBgn0027081	1	2L:12106021	0.25	2L	12106021	A	G	AG	TRUE	32	199.6	AC=1;AF=0.500;AN=2;BaseQRankSum=3.340;DP=32;ExcessHet=3.0103;FS=6.893;MLEAC=1;MLEAF=0.500;MQ=60.00;MQRankSum=0.000;QD=6.24;ReadPosRankSum=-0.087;SOR=2.546	GT:AD:DP:GQ:PL	0/1:24,8:32:99:207,0,694	4	5.11791	5.14664	0.914631	2.22626	2.05694	4.49249
d225010	Ib	CG16974	FBgn0032479	-1	2L:13189312	0.372549	2L	13189312	T	C	AG	TRUE	51	539.6	AC=1;AF=0.500;AN=2;BaseQRankSum=3.921;DP=51;ExcessHet=3.0103;FS=17.041;MLEAC=1;MLEAF=0.500;MQ=60.00;MQRankSum=0.000;QD=10.58;ReadPosRankSum=0.137;SOR=1.035	GT:AD:DP:GQ:PL	0/1:32,19:51:99:547,0,932	4	3.8107	3.63081	0.755289	1.61977	1.51626	4.49249
d225010	Ib	nAChRalpha5	FBgn0028875	1	2L:14083516	1	2L	14083516	A	G	AG	TRUE	69	3123.03	AC=2;AF=1.00;AN=2;DP=69;ExcessHet=3.0103;FS=0.000;MLEAC=2;MLEAF=1.00;MQ=60.00;QD=37.93;SOR=0.980	GT:AD:DP:GQ:PL	1/1:0,69:69:99:3137,211,0	4	2.17311	2.13145	0.632364	0.0571794	0.030452	4.49249
d225010	Ib	nAChRalpha5	FBgn0028875	1	2L:14083517	1	2L	14083517	A	G	AG	TRUE	70	3158.03	AC=2;AF=1.00;AN=2;DP=70;ExcessHet=3.0103;FS=0.000;MLEAC=2;MLEAF=1.00;MQ=60.00;QD=33.36;SOR=1.011	GT:AD:DP:GQ:PL	1/1:0,70:70:99:3172,214,0	4	2.17311	2.13145	0.632364	0.0571794	0.030452	4.49249
d225010	Ib	nAChRalpha5	FBgn0028875	1	2L:14089204	1	2L	14089204	A	G	AG	TRUE	67	2583.03	AC=2;AF=1.00;AN=2;DP=67;ExcessHet=3.0103;FS=0.000;MLEAC=2;MLEAF=1.00;MQ=60.00;QD=35.14;SOR=2.636	GT:AD:DP:GQ:PL	1/1:0,67:67:99:2597,201,0	4	2.17311	2.13145	0.632364	0.0571794	0.030452	4.49249
d225010	Ib	nAChRalpha5	FBgn0028875	1	2L:14089207	0.283582	2L	14089207	A	G	AG	TRUE	67	510.6	AC=1;AF=0.500;AN=2;BaseQRankSum=4.953;DP=67;ExcessHet=3.0103;FS=4.977;MLEAC=1;MLEAF=0.500;MQ=60.00;MQRankSum=0.000;QD=7.62;ReadPosRankSum=0.546;SOR=1.695	GT:AD:DP:GQ:PL	0/1:48,19:67:99:518,0,1432	4	2.17311	2.13145	0.632364	0.0571794	0.030452	4.49249
d225010	Ib	nAChRalpha5	FBgn0028875	1	2L:14089221	0.666667	2L	14089221	A	G	AG	TRUE	69	1372.6	AC=1;AF=0.500;AN=2;BaseQRankSum=4.017;DP=69;ExcessHet=3.0103;FS=8.371;MLEAC=1;MLEAF=0.500;MQ=60.00;MQRankSum=0.000;QD=19.89;ReadPosRankSum=1.597;SOR=0.162	GT:AD:DP:GQ:PL	0/1:23,46:69:99:1380,0,553	4	2.17311	2.13145	0.632364	0.0571794	0.030452	4.49249
d225010	Ib	nAChRalpha5	FBgn0028875	1	2L:14089236	0.724138	2L	14089236	A	G	AG	TRUE	58	1257.6	AC=1;AF=0.500;AN=2;BaseQRankSum=2.871;DP=58;ExcessHet=3.0103;FS=2.503;MLEAC=1;MLEAF=0.500;MQ=60.00;MQRankSum=0.000;QD=21.68;ReadPosRankSum=0.533;SOR=0.420	GT:AD:DP:GQ:PL	0/1:16,42:58:99:1265,0,355	4	2.17311	2.13145	0.632364	0.0571794	0.030452	4.49249
d225010	Ib	nAChRalpha5	FBgn0028875	1	2L:14089246	1	2L	14089246	A	G	AG	TRUE	54	2382.03	AC=2;AF=1.00;AN=2;DP=54;ExcessHet=3.0103;FS=0.000;MLEAC=2;MLEAF=1.00;MQ=60.00;QD=31.65;SOR=1.118	GT:AD:DP:GQ:PL	1/1:0,54:54:99:2396,136,0	4	2.17311	2.13145	0.632364	0.0571794	0.030452	4.49249
d225010	Ib	Snx21	FBgn0031457	-1	2L:2764371	0.411765	2L	2764371	T	C	AG	TRUE	17	244.6	AC=1;AF=0.500;AN=2;BaseQRankSum=3.553;DP=17;ExcessHet=3.0103;FS=13.554;MLEAC=1;MLEAF=0.500;MQ=60.00;MQRankSum=0.000;QD=14.39;ReadPosRankSum=-3.379;SOR=4.174	GT:AD:DP:GQ:PL	0/1:10,7:17:99:252,0,508	4	3.71689	5.92923	0.00165457	2.46603	2.37167	4.49249
d225010	Ib	toc	FBgn0015600	-1	2L:3127431	0.42623	2L	3127431	T	C	AG	TRUE	61	786.6	AC=1;AF=0.500;AN=2;BaseQRankSum=5.375;DP=61;ExcessHet=3.0103;FS=0.000;MLEAC=1;MLEAF=0.500;MQ=60.00;MQRankSum=0.000;QD=12.90;ReadPosRankSum=-1.344;SOR=0.786	GT:AD:DP:GQ:PL	0/1:35,26:61:99:794,0,925	4	2.90338	3.0015	0.854332	0.60002	0.848108	4.49249
d225010	Ib	toc	FBgn0015600	-1	2L:3127506	0.511111	2L	3127506	T	C	AG	TRUE	45	620.6	AC=1;AF=0.500;AN=2;BaseQRankSum=2.132;DP=45;ExcessHet=3.0103;FS=1.145;MLEAC=1;MLEAF=0.500;MQ=60.00;MQRankSum=0.000;QD=13.79;ReadPosRankSum=-2.272;SOR=0.636	GT:AD:DP:GQ:PL	0/1:22,23:45:99:628,0,553	4	2.90338	3.0015	0.854332	0.60002	0.848108	4.49249
d225010	Ib	GramD1B	FBgn0085423	-1	2L:3358929	1	2L	3358929	T	C	AG	TRUE	28	960.03	AC=2;AF=1.00;AN=2;DP=28;ExcessHet=3.0103;FS=0.000;MLEAC=2;MLEAF=1.00;MQ=60.00;QD=34.29;SOR=1.863	GT:AD:DP:GQ:PL	1/1:0,28:28:84:974,84,0	4	1.42535	1.38029	0.93415	0.581157	0.778327	4.49249
d225010	Ib	CG9662	FBgn0031529	-1	2L:3375848	0.714286	2L	3375848	T	C	AG	TRUE	14	300.6	AC=1;AF=0.500;AN=2;BaseQRankSum=2.666;DP=14;ExcessHet=3.0103;FS=0.000;MLEAC=1;MLEAF=0.500;MQ=60.00;MQRankSum=0.000;QD=21.47;ReadPosRankSum=-1.401;SOR=1.765	GT:AD:DP:GQ:PL	0/1:4,10:14:78:308,0,78	4	4.79971	4.26303	0.58721	2.25071	2.37554	4.49249
d225010	Ib	fipi	FBgn0031627	-1	2L:4735173	0.545455	2L	4735173	T	C	AG	TRUE	22	342.6	AC=1;AF=0.500;AN=2;BaseQRankSum=0.136;DP=22;ExcessHet=3.0103;FS=7.168;MLEAC=1;MLEAF=0.500;MQ=60.00;MQRankSum=0.000;QD=15.57;ReadPosRankSum=0.661;SOR=1.911	GT:AD:DP:GQ:PL	0/1:10,12:22:99:350,0,293	4	5.70931	5.32823	0.250204	0.307762	0.421432	4.49249
d225010	Ib	muc	FBgn0283658	1	2L:7429847	0.537313	2L	7429847	A	G	AG	TRUE	67	1320.6	AC=1;AF=0.500;AN=2;BaseQRankSum=-4.961;DP=67;ExcessHet=3.0103;FS=21.867;MLEAC=1;MLEAF=0.500;MQ=60.00;MQRankSum=0.000;QD=19.71;ReadPosRankSum=-2.324;SOR=3.033	GT:AD:DP:GQ:PL	0/1:31,36:67:99:1328,0,1283	4	4.74482	3.37582	0.364846	4.13376	4.20774	4.49249
d225010	Ib	14-3-3zeta	FBgn0004907	1	2R:10108801	0.162562	2R	10108801	A	G	AG	TRUE	203	712.6	AC=1;AF=0.500;AN=2;BaseQRankSum=5.664;DP=203;ExcessHet=3.0103;FS=3.682;MLEAC=1;MLEAF=0.500;MQ=60.00;MQRankSum=0.000;QD=3.51;ReadPosRankSum=-1.711;SOR=0.422	GT:AD:DP:GQ:PL	0/1:170,33:203:99:720,0,5198	4	10.0161	10.0638	0.920612	8.20641	7.91397	4.49249
d225010	Ib	RpS15Ab	FBgn0033555	1	2R:10822309	1	2R	10822309	A	G	AG	TRUE	11	372.02	AC=2;AF=1.00;AN=2;DP=11;ExcessHet=3.0103;FS=0.000;MLEAC=2;MLEAF=1.00;MQ=60.00;QD=33.82;SOR=4.977	GT:AD:DP:GQ:PL	1/1:0,11:11:33:386,33,0	4	3.76529	3.1313	0.134754	5.69163	5.75158	4.49249
d225010	Ib	nclb	FBgn0263510	1	2R:10876649	1	2R	10876649	A	G	AG	TRUE	19	700.03	AC=2;AF=1.00;AN=2;DP=19;ExcessHet=3.0103;FS=0.000;MLEAC=2;MLEAF=1.00;MQ=60.00;QD=28.95;SOR=0.793	GT:AD:DP:GQ:PL	1/1:0,19:19:57:714,57,0	4	2.63709	1.58521	0.250542	0.492658	0.759112	4.49249
d225010	Ib	qvr	FBgn0260499	1	2R:11447607	1	2R	11447607	A	G	AG	TRUE	40	1577.03	AC=2;AF=1.00;AN=2;DP=40;ExcessHet=3.0103;FS=0.000;MLEAC=2;MLEAF=1.00;MQ=60.00;QD=28.71;SOR=0.693	GT:AD:DP:GQ:PL	1/1:0,40:40:99:1591,120,0	4	3.052	2.03341	0.0334999	0.269526	0.0914841	4.49249
d225010	Ib	Iswi	FBgn0011604	1	2R:12640166	1	2R	12640166	A	G	AG	TRUE	37	1301.03	AC=2;AF=1.00;AN=2;DP=37;ExcessHet=3.0103;FS=0.000;MLEAC=2;MLEAF=1.00;MQ=60.00;QD=30.89;SOR=1.270	GT:AD:DP:GQ:PL	1/1:0,37:37:99:1315,111,0	4	1.73776	1.85279	0.924477	0.437872	0.449027	4.49249
d225010	Ib	NAT1	FBgn0010488	1	2R:12921246	0.352941	2R	12921246	A	G	AG	TRUE	17	159.6	AC=1;AF=0.500;AN=2;BaseQRankSum=2.012;DP=17;ExcessHet=3.0103;FS=0.000;MLEAC=1;MLEAF=0.500;MQ=60.00;MQRankSum=0.000;QD=9.39;ReadPosRankSum=-0.458;SOR=0.735	GT:AD:DP:GQ:PL	0/1:11,6:17:99:167,0,276	4	4.55701	5.52808	0.00301008	4.16676	3.64409	4.49249
d225010	Ib	CG3955	FBgn0033793	-1	2R:13128147	0.128571	2R	13128147	T	C	AG	TRUE	70	125.6	AC=1;AF=0.500;AN=2;BaseQRankSum=3.305;DP=70;ExcessHet=3.0103;FS=8.560;MLEAC=1;MLEAF=0.500;MQ=60.00;MQRankSum=0.000;QD=1.79;ReadPosRankSum=1.068;SOR=2.398	GT:AD:DP:GQ:PL	0/1:61,9:70:99:133,0,1873	4	4.54626	4.75042	0.982538	0.118374	0.14535	4.49249
d225010	Ib	CG6329	FBgn0033872	1	2R:13832057	0.739437	2R	13832057	A	G	AG	TRUE	142	4281.6	AC=1;AF=0.500;AN=2;BaseQRankSum=1.951;DP=142;ExcessHet=3.0103;FS=4.811;MLEAC=1;MLEAF=0.500;MQ=60.00;MQRankSum=0.000;QD=30.15;ReadPosRankSum=-1.791;SOR=0.387	GT:AD:DP:GQ:PL	0/1:37,105:142:99:4289,0,1269	4	6.30782	5.19838	0.0246684	0.326178	0.229277	4.49249
d225010	Ib	CG6329	FBgn0033872	1	2R:13832539	0.47619	2R	13832539	A	G	AG	TRUE	127	1848.6	AC=1;AF=0.500;AN=2;BaseQRankSum=8.350;DP=127;ExcessHet=3.0103;FS=6.646;MLEAC=1;MLEAF=0.500;MQ=60.00;MQRankSum=0.000;QD=14.67;ReadPosRankSum=3.345;SOR=0.996	GT:AD:DP:GQ:PL	0/1:66,60:126:99:1856,0,1813	4	6.30782	5.19838	0.0246684	0.326178	0.229277	4.49249
d225010	Ib	Prosap	FBgn0040752	-1	2R:14062651	1	2R	14062651	T	C	AG	TRUE	17	588.03	AC=2;AF=1.00;AN=2;DP=17;ExcessHet=3.0103;FS=0.000;MLEAC=2;MLEAF=1.00;MQ=60.00;QD=34.59;SOR=1.061	GT:AD:DP:GQ:PL	1/1:0,17:17:51:602,51,0	4	3.67189	3.09119	0.0790468	0.867644	0.923605	4.49249
d225010	Ib	ReepB	FBgn0033906	1	2R:14172781	0.861357	2R	14172781	A	G	AG	TRUE	339	9199.6	AC=1;AF=0.500;AN=2;BaseQRankSum=4.811;DP=339;ExcessHet=3.0103;FS=2.589;MLEAC=1;MLEAF=0.500;MQ=60.00;MQRankSum=0.000;QD=27.14;ReadPosRankSum=-1.986;SOR=0.506	GT:AD:DP:GQ:PL	0/1:47,292:339:99:9207,0,590	4	8.82339	8.47452	0.973655	7.40431	7.35215	4.49249
d225010	Ib	ReepB	FBgn0033906	1	2R:14172820	0.86692	2R	14172820	A	G	AG	TRUE	263	7521.6	AC=1;AF=0.500;AN=2;BaseQRankSum=7.204;DP=263;ExcessHet=3.0103;FS=3.256;MLEAC=1;MLEAF=0.500;MQ=60.00;MQRankSum=0.000;QD=28.60;ReadPosRankSum=1.839;SOR=0.380	GT:AD:DP:GQ:PL	0/1:35,228:263:99:7529,0,244	4	8.82339	8.47452	0.973655	7.40431	7.35215	4.49249
d225010	Ib	CG8405	FBgn0034071	1	2R:16048343	0.172414	2R	16048343	A	G	AG	TRUE	29	65.6	AC=1;AF=0.500;AN=2;BaseQRankSum=0.856;DP=29;ExcessHet=3.0103;FS=4.703;MLEAC=1;MLEAF=0.500;MQ=60.00;MQRankSum=0.000;QD=2.26;SOR=0.722	GT:AD:DP:GQ:PL	0/1:24,5:29:73:73,0,685	4	2.53302	2.65448	0.692047	1.04381	0.98824	4.49249
d225010	Ib	Got1	FBgn0001124	1	2R:16141326	0.307692	2R	16141326	A	G	AG	TRUE	39	313.6	AC=1;AF=0.500;AN=2;BaseQRankSum=3.570;DP=39;ExcessHet=3.0103;FS=0.000;MLEAC=1;MLEAF=0.500;MQ=60.00;MQRankSum=0.000;QD=8.04;ReadPosRankSum=-0.245;SOR=0.627	GT:AD:DP:GQ:PL	0/1:27,12:39:99:321,0,803	4	4.46672	4.50823	0.923616	5.08115	5.69811	4.49249
d225010	Ib	cv-2	FBgn0000395	-1	2R:21355574	1	2R	21355574	T	C	AG	TRUE	51	1838.03	AC=2;AF=1.00;AN=2;DP=51;ExcessHet=3.0103;FS=0.000;MLEAC=2;MLEAF=1.00;MQ=60.00;QD=28.82;SOR=0.813	GT:AD:DP:GQ:PL	1/1:0,51:51:99:1852,153,0	4	3.65516	4.56181	0.648047	0.897125	1.17365	4.49249
d225010	Ib	CG13506	FBgn0034723	1	2R:22391510	0.291667	2R	22391510	A	G	AG	TRUE	48	343.6	AC=1;AF=0.500;AN=2;BaseQRankSum=2.580;DP=48;ExcessHet=3.0103;FS=7.086;MLEAC=1;MLEAF=0.500;MQ=60.00;MQRankSum=0.000;QD=7.16;ReadPosRankSum=2.131;SOR=1.911	GT:AD:DP:GQ:PL	0/1:34,14:48:99:351,0,972	4	4.13675	4.31975	0.246252	0.498164	0.623232	4.49249
d225010	Ib	CG4612	FBgn0035016	-1	2R:24523365	0.241379	2R	24523365	T	C	AG	TRUE	58	325.6	AC=1;AF=0.500;AN=2;BaseQRankSum=-2.418;DP=58;ExcessHet=3.0103;FS=33.807;MLEAC=1;MLEAF=0.500;MQ=60.00;MQRankSum=0.000;QD=5.61;ReadPosRankSum=1.284;SOR=5.421	GT:AD:DP:GQ:PL	0/1:44,14:58:99:333,0,1794	4	5.78401	5.60528	0.826696	1.76623	1.27661	4.49249
d225010	Ib	CG14591	FBgn0033054	-1	2R:6037128	0.405405	2R	6037128	T	C	AG	TRUE	74	862.6	AC=1;AF=0.500;AN=2;BaseQRankSum=4.507;DP=74;ExcessHet=3.0103;FS=2.136;MLEAC=1;MLEAF=0.500;MQ=60.00;MQRankSum=0.000;QD=11.66;ReadPosRankSum=-0.416;SOR=1.050	GT:AD:DP:GQ:PL	0/1:44,30:74:99:870,0,1308	4	4.47495	4.49171	0.904654	0.132465	0.0680559	4.49249
d225010	Ib	Gbs-76A	FBgn0036862	-1	3L:19283264	1	3L	19283264	T	C	AG	TRUE	62	2139.03	AC=2;AF=1.00;AN=2;DP=62;ExcessHet=3.0103;FS=0.000;MLEAC=2;MLEAF=1.00;MQ=60.00;QD=34.50;SOR=1.888	GT:AD:DP:GQ:PL	1/1:0,62:62:99:2153,186,0	4	2.62452	1.40716	0.00204643	3.06808	2.85648	4.49249
d225010	Ib	Shab	FBgn0262593	1	3L:2925255	0.939394	3L	2925255	A	G	AG	TRUE	33	1036.02	AC=2;AF=1.00;AN=2;BaseQRankSum=1.901;DP=33;ExcessHet=3.0103;FS=3.647;MLEAC=2;MLEAF=1.00;MQ=60.00;MQRankSum=0.000;QD=31.39;ReadPosRankSum=-0.911;SOR=2.376	GT:AD:DP:GQ:PL	1/1:2,31:33:31:1050,31,0	4	3.60169	2.82872	0.0568977	0.796233	0.656306	4.49249
d225010	Ib	Shab	FBgn0262593	1	3L:2941132	1	3L	2941132	A	G	AG	TRUE	55	2032.03	AC=2;AF=1.00;AN=2;DP=55;ExcessHet=3.0103;FS=0.000;MLEAC=2;MLEAF=1.00;MQ=60.00;QD=24.60;SOR=0.729	GT:AD:DP:GQ:PL	1/1:0,55:55:99:2046,165,0	4	3.60169	2.82872	0.0568977	0.796233	0.656306	4.49249
d225010	Ib	Shab	FBgn0262593	1	3L:2941216	0.311111	3L	2941216	A	G	AG	TRUE	45	347.6	AC=1;AF=0.500;AN=2;BaseQRankSum=1.195;DP=45;ExcessHet=3.0103;FS=5.123;MLEAC=1;MLEAF=0.500;MQ=60.00;MQRankSum=0.000;QD=7.72;ReadPosRankSum=1.086;SOR=0.209	GT:AD:DP:GQ:PL	0/1:31,14:45:99:355,0,889	4	3.60169	2.82872	0.0568977	0.796233	0.656306	4.49249
d225010	Ib	Shab	FBgn0262593	1	3L:2941312	0.277778	3L	2941312	A	G	AG	TRUE	36	276.6	AC=1;AF=0.500;AN=2;BaseQRankSum=4.477;DP=36;ExcessHet=3.0103;FS=0.000;MLEAC=1;MLEAF=0.500;MQ=60.00;MQRankSum=0.000;QD=7.68;ReadPosRankSum=-1.808;SOR=0.495	GT:AD:DP:GQ:PL	0/1:26,10:36:99:284,0,734	4	3.60169	2.82872	0.0568977	0.796233	0.656306	4.49249
d225010	Ib	Shab	FBgn0262593	1	3L:2941364	0.372549	3L	2941364	A	G	AG	TRUE	51	537.6	AC=1;AF=0.500;AN=2;BaseQRankSum=4.192;DP=51;ExcessHet=3.0103;FS=1.263;MLEAC=1;MLEAF=0.500;MQ=60.00;MQRankSum=0.000;QD=10.54;ReadPosRankSum=0.176;SOR=0.418	GT:AD:DP:GQ:PL	0/1:32,19:51:99:545,0,953	4	3.60169	2.82872	0.0568977	0.796233	0.656306	4.49249
d225010	Ib	Shab	FBgn0262593	1	3L:2941396	0.283019	3L	2941396	A	G	AG	TRUE	53	410.6	AC=1;AF=0.500;AN=2;BaseQRankSum=4.688;DP=53;ExcessHet=3.0103;FS=1.156;MLEAC=1;MLEAF=0.500;MQ=60.00;MQRankSum=0.000;QD=7.75;ReadPosRankSum=0.257;SOR=0.734	GT:AD:DP:GQ:PL	0/1:38,15:53:99:418,0,1083	4	3.60169	2.82872	0.0568977	0.796233	0.656306	4.49249
d225010	Ib	Shab	FBgn0262593	1	3L:2941426	1	3L	2941426	A	G	AG	TRUE	43	1505.03	AC=2;AF=1.00;AN=2;DP=43;ExcessHet=3.0103;FS=0.000;MLEAC=2;MLEAF=1.00;MQ=60.00;QD=28.01;SOR=3.109	GT:AD:DP:GQ:PL	1/1:0,43:43:99:1519,129,0	4	3.60169	2.82872	0.0568977	0.796233	0.656306	4.49249
d225010	Ib	nAChRbeta1	FBgn0000038	1	3L:4429963	1	3L	4429963	A	G	AG	TRUE	60	2203.03	AC=2;AF=1.00;AN=2;DP=60;ExcessHet=3.0103;FS=0.000;MLEAC=2;MLEAF=1.00;MQ=60.00;QD=29.99;SOR=2.546	GT:AD:DP:GQ:PL	1/1:0,60:60:99:2217,180,0	4	6.35534	5.5438	0.188032	0.118617	0.0901246	4.49249
d225010	Ib	nAChRbeta1	FBgn0000038	1	3L:4430208	0.219512	3L	4430208	A	G	AG	TRUE	41	174.6	AC=1;AF=0.500;AN=2;BaseQRankSum=-0.416;DP=41;ExcessHet=3.0103;FS=12.481;MLEAC=1;MLEAF=0.500;MQ=60.00;MQRankSum=0.000;QD=4.26;ReadPosRankSum=0.158;SOR=3.056	GT:AD:DP:GQ:PL	0/1:32,9:41:99:182,0,970	4	6.35534	5.5438	0.188032	0.118617	0.0901246	4.49249
d225010	Ib	nAChRbeta1	FBgn0000038	1	3L:4432487	0.148148	3L	4432487	A	G	AG	TRUE	27	55.6	AC=1;AF=0.500;AN=2;BaseQRankSum=0.301;DP=27;ExcessHet=3.0103;FS=6.898;MLEAC=1;MLEAF=0.500;MQ=60.00;MQRankSum=0.000;QD=2.06;ReadPosRankSum=-1.100;SOR=0.061	GT:AD:DP:GQ:PL	0/1:23,4:27:63:63,0,701	4	6.35534	5.5438	0.188032	0.118617	0.0901246	4.49249
d225010	Ib	CalpB	FBgn0025866	1	3L:9892134	1	3L	9892134	A	G	AG	TRUE	21	737.03	AC=2;AF=1.00;AN=2;DP=21;ExcessHet=3.0103;FS=0.000;MLEAC=2;MLEAF=1.00;MQ=60.00;QD=27.38;SOR=0.990	GT:AD:DP:GQ:PL	1/1:0,21:21:63:751,63,0	4	1.80038	2.71363	0.742166	2.08589	1.42145	4.49249
d225010	Ib	EndoA	FBgn0038659	1	3R:18909164	0.5	3R	18909164	A	G	AG	TRUE	12	177.6	AC=1;AF=0.500;AN=2;BaseQRankSum=2.316;DP=12;ExcessHet=3.0103;FS=0.000;MLEAC=1;MLEAF=0.500;MQ=60.00;MQRankSum=0.000;QD=14.80;ReadPosRankSum=0.310;SOR=0.307	GT:AD:DP:GQ:PL	0/1:6,6:12:99:185,0,128	4	4.7728	5.29408	0.154643	0.85352	0.843628	4.49249
d225010	Ib	vib	FBgn0267975	-1	3R:19226523	0.403509	3R	19226523	T	C	AG	TRUE	58	646.6	AC=1;AF=0.500;AN=2;BaseQRankSum=3.026;DP=58;ExcessHet=3.0103;FS=0.000;MLEAC=1;MLEAF=0.500;MQ=60.00;MQRankSum=0.000;QD=11.34;ReadPosRankSum=-0.800;SOR=0.598	GT:AD:DP:GQ:PL	0/1:34,23:57:99:654,0,879	4	5.02601	5.14846	0.946513	3.41525	3.2449	4.49249
d225010	Ib	Cow	FBgn0039054	-1	3R:23112549	0.181818	3R	23112549	T	C	AG	TRUE	66	224.6	AC=1;AF=0.500;AN=2;BaseQRankSum=3.166;DP=66;ExcessHet=3.0103;FS=1.208;MLEAC=1;MLEAF=0.500;MQ=60.00;MQRankSum=0.000;QD=3.40;ReadPosRankSum=0.083;SOR=0.933	GT:AD:DP:GQ:PL	0/1:54,12:66:99:232,0,1531	4	6.07048	6.14794	0.757327	0.0371922	0.0664222	4.49249
d225010	Ib	ATPsynCF6	FBgn0016119	-1	3R:23355357	0.704082	3R	23355357	T	C	AG	TRUE	98	2044.6	AC=1;AF=0.500;AN=2;BaseQRankSum=1.392;DP=98;ExcessHet=3.0103;FS=3.005;MLEAC=1;MLEAF=0.500;MQ=60.00;MQRankSum=0.000;QD=20.86;ReadPosRankSum=0.583;SOR=0.294	GT:AD:DP:GQ:PL	0/1:29,69:98:99:2052,0,669	4	9.01907	8.99728	0.563116	8.34196	8.52202	4.49249
d225010	Ib	Sec13	FBgn0024509	1	3R:23357683	1	3R	23357683	A	G	AG	TRUE	30	1062.03	AC=2;AF=1.00;AN=2;DP=30;ExcessHet=3.0103;FS=0.000;MLEAC=2;MLEAF=1.00;MQ=60.00;QD=25.73;SOR=0.826	GT:AD:DP:GQ:PL	1/1:0,30:30:90:1076,90,0	4	3.99691	3.71929	0.929505	3.0338	3.04866	4.49249
d225010	Ib	Gdh	FBgn0001098	-1	3R:23936205	0.987179	3R	23936205	T	C	AG	TRUE	78	2799.03	AC=2;AF=1.00;AN=2;BaseQRankSum=-1.662;DP=78;ExcessHet=3.0103;FS=0.000;MLEAC=2;MLEAF=1.00;MQ=60.00;MQRankSum=0.000;QD=32.85;ReadPosRankSum=1.696;SOR=0.773	GT:AD:DP:GQ:PL	1/1:1,77:78:99:2813,201,0	4	6.73636	5.26871	0.00814535	4.37474	4.57326	4.49249
d225010	Ib	CG31140	FBgn0051140	1	3R:23976395	0.4	3R	23976395	A	G	AG	TRUE	20	177.6	AC=1;AF=0.500;AN=2;BaseQRankSum=-0.745;DP=20;ExcessHet=3.0103;FS=4.415;MLEAC=1;MLEAF=0.500;MQ=60.00;MQRankSum=0.000;QD=8.88;ReadPosRankSum=-1.894;SOR=0.939	GT:AD:DP:GQ:PL	0/1:12,8:20:99:185,0,317	4	5.33289	5.77175	0.887479	1.38007	1.01442	4.49249
d225010	Ib	slo	FBgn0003429	1	3R:24675663	0.634146	3R	24675663	A	G	AG	TRUE	41	823.6	AC=1;AF=0.500;AN=2;BaseQRankSum=2.674;DP=41;ExcessHet=3.0103;FS=5.654;MLEAC=1;MLEAF=0.500;MQ=60.00;MQRankSum=0.000;QD=20.09;ReadPosRankSum=-1.451;SOR=2.027	GT:AD:DP:GQ:PL	0/1:15,26:41:99:831,0,376	4	3.31874	4.49559	0.310436	1.1716	0.687207	4.49249
d225010	Ib	slo	FBgn0003429	1	3R:24707423	1	3R	24707423	A	G	AG	TRUE	14	485.03	AC=2;AF=1.00;AN=2;DP=14;ExcessHet=3.0103;FS=0.000;MLEAC=2;MLEAF=1.00;MQ=60.00;QD=34.64;SOR=2.303	GT:AD:DP:GQ:PL	1/1:0,14:14:42:499,42,0	4	3.31874	4.49559	0.310436	1.1716	0.687207	4.49249
d225010	Ib	slo	FBgn0003429	1	3R:24708330	0.171875	3R	24708330	A	G	AG	TRUE	64	285.6	AC=1;AF=0.500;AN=2;BaseQRankSum=4.873;DP=64;ExcessHet=3.0103;FS=15.869;MLEAC=1;MLEAF=0.500;MQ=60.00;MQRankSum=0.000;QD=4.46;ReadPosRankSum=1.841;SOR=3.716	GT:AD:DP:GQ:PL	0/1:53,11:64:99:293,0,3154	4	3.31874	4.49559	0.310436	1.1716	0.687207	4.49249
d225010	Ib	Ald1	FBgn0000064	-1	3R:26254245	0.475676	3R	26254245	T	C	AG	TRUE	185	2512.6	AC=1;AF=0.500;AN=2;BaseQRankSum=6.454;DP=185;ExcessHet=3.0103;FS=1.311;MLEAC=1;MLEAF=0.500;MQ=60.00;MQRankSum=0.000;QD=13.58;ReadPosRankSum=-0.934;SOR=0.841	GT:AD:DP:GQ:PL	0/1:97,88:185:99:2520,0,2510	4	11.4026	10.0568	0.0414265	10.8637	11.1339	4.49249
d225010	Ib	Ald1	FBgn0000064	-1	3R:26254381	0.484305	3R	26254381	T	C	AG	TRUE	223	3356.6	AC=1;AF=0.500;AN=2;BaseQRankSum=6.866;DP=223;ExcessHet=3.0103;FS=1.620;MLEAC=1;MLEAF=0.500;MQ=60.00;MQRankSum=0.000;QD=15.05;ReadPosRankSum=1.165;SOR=0.582	GT:AD:DP:GQ:PL	0/1:115,108:223:99:3364,0,3417	4	11.4026	10.0568	0.0414265	10.8637	11.1339	4.49249
d225010	Ib	Hmu	FBgn0015737	1	3R:27290230	0.333333	3R	27290230	A	G	AG	TRUE	36	301.6	AC=1;AF=0.500;AN=2;BaseQRankSum=3.660;DP=36;ExcessHet=3.0103;FS=1.399;MLEAC=1;MLEAF=0.500;MQ=60.00;MQRankSum=0.000;QD=8.38;ReadPosRankSum=-1.008;SOR=0.921	GT:AD:DP:GQ:PL	0/1:24,12:36:99:309,0,619	4	5.87173	5.77395	0.390105	2.59234	2.73469	4.49249
d225010	Ib	Gp93	FBgn0039562	1	3R:27951705	0.2	3R	27951705	A	G	AG	TRUE	65	375.6	AC=1;AF=0.500;AN=2;BaseQRankSum=0.605;DP=65;ExcessHet=3.0103;FS=0.000;MLEAC=1;MLEAF=0.500;MQ=60.00;MQRankSum=0.000;QD=5.78;ReadPosRankSum=0.330;SOR=0.724	GT:AD:DP:GQ:PL	0/1:52,13:65:99:383,0,3007	4	5.46458	5.53278	0.962357	2.74479	2.53149	4.49249
d225010	Ib	betaTub97EF	FBgn0003890	-1	3R:27967290	0.727273	3R	27967290	T	C	AG	TRUE	11	311.6	AC=1;AF=0.500;AN=2;BaseQRankSum=0.000;DP=11;ExcessHet=3.0103;FS=0.000;MLEAC=1;MLEAF=0.500;MQ=60.00;MQRankSum=0.000;QD=28.33;ReadPosRankSum=1.200;SOR=0.368	GT:AD:DP:GQ:PL	0/1:3,8:11:41:319,0,41	4	0.831406	0.24625	8.04814e-05	1.51149	1.698	4.49249
d225010	Ib	betaTub97EF	FBgn0003890	-1	3R:27967292	0.727273	3R	27967292	T	C	AG	TRUE	11	311.6	AC=1;AF=0.500;AN=2;BaseQRankSum=0.000;DP=11;ExcessHet=3.0103;FS=0.000;MLEAC=1;MLEAF=0.500;MQ=60.00;MQRankSum=0.000;QD=28.33;ReadPosRankSum=1.200;SOR=0.368	GT:AD:DP:GQ:PL	0/1:3,8:11:41:319,0,41	4	0.831406	0.24625	8.04814e-05	1.51149	1.698	4.49249
d225010	Ib	CG1907	FBgn0039674	1	3R:29620590	0.703704	3R	29620590	A	G	AG	TRUE	27	766.6	AC=1;AF=0.500;AN=2;BaseQRankSum=3.284;DP=27;ExcessHet=3.0103;FS=0.000;MLEAC=1;MLEAF=0.500;MQ=60.00;MQRankSum=0.000;QD=28.39;ReadPosRankSum=-1.280;SOR=1.058	GT:AD:DP:GQ:PL	0/1:8,19:27:99:774,0,279	4	2.96927	1.9565	0.114002	3.63121	3.23907	4.49249
d225010	Ib	kay	FBgn0001297	1	3R:29792043	0.391304	3R	29792043	A	G	AG	TRUE	23	304.6	AC=1;AF=0.500;AN=2;BaseQRankSum=3.288;DP=23;ExcessHet=3.0103;FS=0.000;MLEAC=1;MLEAF=0.500;MQ=60.00;MQRankSum=0.000;QD=13.24;ReadPosRankSum=-0.858;SOR=0.892	GT:AD:DP:GQ:PL	0/1:14,9:23:99:312,0,481	4	5.08707	5.90756	0.125239	4.66592	4.33526	4.49249
d225010	Ib	VhaAC45RP	FBgn0051030	-1	3R:30165949	0.911504	3R	30165949	T	C	AG	TRUE	113	4099.6	AC=1;AF=0.500;AN=2;BaseQRankSum=0.612;DP=113;ExcessHet=3.0103;FS=0.000;MLEAC=1;MLEAF=0.500;MQ=60.00;MQRankSum=0.000;QD=28.54;ReadPosRankSum=1.338;SOR=0.752	GT:AD:DP:GQ:PL	0/1:10,103:113:65:4107,0,65	4	6.3392	6.42463	0.721484	0.410326	0.49666	4.49249
d225010	Ib	VhaAC45RP	FBgn0051030	-1	3R:30166167	0.818182	3R	30166167	T	C	AG	TRUE	66	2553.6	AC=1;AF=0.500;AN=2;BaseQRankSum=4.778;DP=66;ExcessHet=3.0103;FS=2.738;MLEAC=1;MLEAF=0.500;MQ=60.00;MQRankSum=0.000;QD=26.48;ReadPosRankSum=1.185;SOR=0.639	GT:AD:DP:GQ:PL	0/1:12,54:66:99:2561,0,240	4	6.3392	6.42463	0.721484	0.410326	0.49666	4.49249
d225010	Ib	VhaAC45RP	FBgn0051030	-1	3R:30166215	0.82716	3R	30166215	T	C	AG	TRUE	81	2258.6	AC=1;AF=0.500;AN=2;BaseQRankSum=5.181;DP=81;ExcessHet=3.0103;FS=1.190;MLEAC=1;MLEAF=0.500;MQ=60.00;MQRankSum=0.000;QD=27.88;ReadPosRankSum=0.269;SOR=0.448	GT:AD:DP:GQ:PL	0/1:14,67:81:99:2266,0,118	4	6.3392	6.42463	0.721484	0.410326	0.49666	4.49249
d225010	Ib	CG1983	FBgn0039751	-1	3R:30176517	1	3R	30176517	T	C	AG	TRUE	11	481.02	AC=2;AF=1.00;AN=2;DP=11;ExcessHet=3.0103;FS=0.000;MLEAC=2;MLEAF=1.00;MQ=60.00;QD=33.62;SOR=1.270	GT:AD:DP:GQ:PL	1/1:0,11:11:33:495,33,0	4	2.38572	2.69018	0.980606	1.77594	1.87856	4.49249
d225010	Ib	CG1983	FBgn0039751	-1	3R:30176862	1	3R	30176862	T	C	AG	TRUE	33	1144.03	AC=2;AF=1.00;AN=2;DP=33;ExcessHet=3.0103;FS=0.000;MLEAC=2;MLEAF=1.00;MQ=60.00;QD=34.67;SOR=1.352	GT:AD:DP:GQ:PL	1/1:0,33:33:99:1158,99,0	4	2.38572	2.69018	0.980606	1.77594	1.87856	4.49249
d225010	Ib	CycG	FBgn0039858	-1	3R:31601551	0.444444	3R	31601551	T	C	AG	TRUE	18	235.6	AC=1;AF=0.500;AN=2;BaseQRankSum=3.122;DP=18;ExcessHet=3.0103;FS=2.003;MLEAC=1;MLEAF=0.500;MQ=60.00;MQRankSum=0.000;QD=13.09;ReadPosRankSum=0.000;SOR=0.223	GT:AD:DP:GQ:PL	0/1:10,8:18:99:243,0,252	4	6.749	7.09638	0.463947	5.43584	5.80647	4.49249
d225010	Ib	cpx	FBgn0041605	1	3R:4301142	0.538462	3R	4301142	A	G	AG	TRUE	14	196.6	AC=1;AF=0.500;AN=2;BaseQRankSum=1.213;DP=14;ExcessHet=3.0103;FS=2.522;MLEAC=1;MLEAF=0.500;MQ=60.00;MQRankSum=0.000;QD=15.12;ReadPosRankSum=0.549;SOR=1.688	GT:AD:DP:GQ:PL	0/1:6,7:13:99:204,0,142	4	7.90852	7.29727	0.637321	0.177459	0.228242	4.49249
d225010	Ib	CG1090	FBgn0037238	1	3R:4365385	0.409836	3R	4365385	A	G	AG	TRUE	61	661.6	AC=1;AF=0.500;AN=2;BaseQRankSum=3.049;DP=61;ExcessHet=3.0103;FS=0.000;MLEAC=1;MLEAF=0.500;MQ=60.00;MQRankSum=0.000;QD=10.85;ReadPosRankSum=-0.442;SOR=0.751	GT:AD:DP:GQ:PL	0/1:36,25:61:99:669,0,939	4	4.19836	3.59903	0.876728	0.070259	0.0808403	4.49249
d225010	Ib	Sec23	FBgn0262125	1	3R:5650231	1	3R	5650231	A	G	AG	TRUE	14	479.03	AC=2;AF=1.00;AN=2;DP=14;ExcessHet=3.0103;FS=0.000;MLEAC=2;MLEAF=1.00;MQ=60.00;QD=34.22;SOR=1.329	GT:AD:DP:GQ:PL	1/1:0,14:14:42:493,42,0	4	3.14569	3.83924	0.425454	2.08578	2.26094	4.49249
d225010	Ib	beag	FBgn0037660	-1	3R:9063537	1	3R	9063537	T	C	AG	TRUE	16	683.03	AC=2;AF=1.00;AN=2;DP=16;ExcessHet=3.0103;FS=0.000;MLEAC=2;MLEAF=1.00;MQ=60.00;QD=31.89;SOR=5.670	GT:AD:DP:GQ:PL	1/1:0,16:16:48:697,48,0	4	1.54635	1.3782	0.945538	1.39988	1.21946	4.49249
d225010	Ib	cac	FBgn0263111	-1	X:11971853	1	X	11971853	T	C	AG	TRUE	28	994.03	AC=2;AF=1.00;AN=2;DP=28;ExcessHet=3.0103;FS=0.000;MLEAC=2;MLEAF=1.00;MQ=60.00;QD=36.66;SOR=0.836	GT:AD:DP:GQ:PL	1/1:0,28:28:84:1008,84,0	4	4.16093	4.30898	0.905929	0.0597302	0.0545455	4.49249
d225010	Ib	cac	FBgn0263111	-1	X:11977538	0.333333	X	11977538	T	C	AG	TRUE	30	282.6	AC=1;AF=0.500;AN=2;BaseQRankSum=3.934;DP=30;ExcessHet=3.0103;FS=6.772;MLEAC=1;MLEAF=0.500;MQ=60.00;MQRankSum=0.000;QD=9.42;ReadPosRankSum=1.392;SOR=2.215	GT:AD:DP:GQ:PL	0/1:20,10:30:99:290,0,590	4	4.16093	4.30898	0.905929	0.0597302	0.0545455	4.49249
d225010	Ib	mmd	FBgn0259110	-1	X:15958587	1	X	15958587	T	C	AG	TRUE	32	955.03	AC=2;AF=1.00;AN=2;DP=32;ExcessHet=3.0103;FS=0.000;MLEAC=2;MLEAF=1.00;MQ=60.00;QD=29.84;SOR=2.165	GT:AD:DP:GQ:PL	1/1:0,32:32:96:969,96,0	4	3.60097	3.71811	0.935588	0.0811994	0.0553438	4.49249
d225010	Ib	para	FBgn0285944	-1	X:16464719	1	X	16464719	T	C	AG	TRUE	14	485.03	AC=2;AF=1.00;AN=2;DP=14;ExcessHet=3.0103;FS=0.000;MLEAC=2;MLEAF=1.00;MQ=60.00;QD=34.64;SOR=0.976	GT:AD:DP:GQ:PL	1/1:0,14:14:42:499,42,0	4	4.84243	5.41949	0.0668684	0.0459099	0.108431	4.49249
d225010	Ib	Sh	FBgn0003380	-1	X:17926624	0.86747	X	17926624	T	C	AG	TRUE	83	2363.6	AC=1;AF=0.500;AN=2;BaseQRankSum=3.211;DP=83;ExcessHet=3.0103;FS=9.815;MLEAC=1;MLEAF=0.500;MQ=60.00;MQRankSum=0.000;QD=28.48;ReadPosRankSum=0.047;SOR=1.230	GT:AD:DP:GQ:PL	0/1:11,72:83:99:2371,0,101	4	5.78478	5.98037	0.885151	2.25586	1.88036	4.49249
d225010	Ib	Sh	FBgn0003380	-1	X:17930658	1	X	17930658	T	C	AG	TRUE	16	553.03	AC=2;AF=1.00;AN=2;DP=16;ExcessHet=3.0103;FS=0.000;MLEAC=2;MLEAF=1.00;MQ=60.00;QD=34.56;SOR=5.670	GT:AD:DP:GQ:PL	1/1:0,16:16:47:567,47,0	4	5.78478	5.98037	0.885151	2.25586	1.88036	4.49249
d225010	Ib	Sh	FBgn0003380	-1	X:17950057	0.846154	X	17950057	T	C	AG	TRUE	39	1216.6	AC=1;AF=0.500;AN=2;BaseQRankSum=2.010;DP=39;ExcessHet=3.0103;FS=7.439;MLEAC=1;MLEAF=0.500;MQ=60.00;MQRankSum=0.000;QD=31.19;ReadPosRankSum=-0.840;SOR=1.395	GT:AD:DP:GQ:PL	0/1:6,33:39:99:1224,0,134	4	5.78478	5.98037	0.885151	2.25586	1.88036	4.49249
d225010	Ib	Frq1	FBgn0030897	1	X:18170126	0.2	X	18170126	A	G	AG	TRUE	250	1032.6	AC=1;AF=0.500;AN=2;BaseQRankSum=6.020;DP=250;ExcessHet=3.0103;FS=6.854;MLEAC=1;MLEAF=0.500;MQ=60.00;MQRankSum=0.000;QD=4.13;ReadPosRankSum=-0.776;SOR=1.315	GT:AD:DP:GQ:PL	0/1:200,50:250:99:1040,0,5977	4	6.87486	6.93852	0.801616	0.138615	0.135627	4.49249
d225010	Ib	Vap33	FBgn0029687	1	X:3953264	0.242424	X	3953264	A	G	AG	TRUE	33	193.6	AC=1;AF=0.500;AN=2;BaseQRankSum=2.840;DP=33;ExcessHet=3.0103;FS=3.772;MLEAC=1;MLEAF=0.500;MQ=60.00;MQRankSum=0.000;QD=5.87;ReadPosRankSum=0.424;SOR=0.223	GT:AD:DP:GQ:PL	0/1:25,8:33:99:201,0,746	4	6.63427	6.82411	0.460294	4.36447	3.97039	4.49249
d225010	Ib	Vap33	FBgn0029687	1	X:3953478	0.30303	X	3953478	A	G	AG	TRUE	33	210.6	AC=1;AF=0.500;AN=2;BaseQRankSum=-0.259;DP=33;ExcessHet=3.0103;FS=22.658;MLEAC=1;MLEAF=0.500;MQ=60.00;MQRankSum=0.000;QD=6.38;ReadPosRankSum=0.767;SOR=0.008	GT:AD:DP:GQ:PL	0/1:23,10:33:99:218,0,788	4	6.63427	6.82411	0.460294	4.36447	3.97039	4.49249
d225010	Ib	CG15771	FBgn0029801	1	X:5759154	0.583333	X	5759154	A	G	AG	TRUE	12	181.6	AC=1;AF=0.500;AN=2;BaseQRankSum=0.000;DP=12;ExcessHet=3.0103;FS=6.532;MLEAC=1;MLEAF=0.500;MQ=60.00;MQRankSum=0.000;QD=15.13;ReadPosRankSum=1.616;SOR=2.550	GT:AD:DP:GQ:PL	0/1:5,7:12:99:189,0,116	4	2.77403	1.38228	0.00798382	0.981371	1.0088	4.49249
d225011	Ib	IA-2	FBgn0031294	-1	2L:1010857	0.272	2L	1010857	T	C	AG	TRUE	125	812.6	AC=1;AF=0.500;AN=2;BaseQRankSum=3.397;DP=125;ExcessHet=3.0103;FS=8.172;MLEAC=1;MLEAF=0.500;MQ=60.00;MQRankSum=0.000;QD=6.50;ReadPosRankSum=0.359;SOR=1.505	GT:AD:DP:GQ:PL	0/1:91,34:125:99:820,0,2586	4	6.54402	7.83614	2.09102e-08	0.302821	0.331543	3.9486
d225011	Ib	salr	FBgn0000287	1	2L:11373223	1	2L	11373223	A	G	AG	TRUE	27	925.03	AC=2;AF=1.00;AN=2;DP=27;ExcessHet=3.0103;FS=0.000;MLEAC=2;MLEAF=1.00;MQ=60.00;QD=34.26;SOR=0.765	GT:AD:DP:GQ:PL	1/1:0,27:27:81:939,81,0	4	3.36969	2.9991	0.771618	0.202178	0.0214256	3.9486
d225011	Ib	CG31705	FBgn0028490	-1	2L:11525232	0.736842	2L	11525232	T	C	AG	TRUE	19	457.6	AC=1;AF=0.500;AN=2;BaseQRankSum=2.896;DP=19;ExcessHet=3.0103;FS=0.000;MLEAC=1;MLEAF=0.500;MQ=60.00;MQRankSum=0.000;QD=24.08;ReadPosRankSum=0.325;SOR=0.573	GT:AD:DP:GQ:PL	0/1:5,14:19:92:465,0,92	4	4.03693	4.29753	0.767202	4.24038	4.53465	3.9486
d225011	Ib	CG31705	FBgn0028490	-1	2L:11525642	0.625	2L	11525642	T	C	AG	TRUE	16	309.6	AC=1;AF=0.500;AN=2;BaseQRankSum=3.064;DP=16;ExcessHet=3.0103;FS=0.000;MLEAC=1;MLEAF=0.500;MQ=60.00;MQRankSum=0.000;QD=19.35;ReadPosRankSum=2.041;SOR=0.534	GT:AD:DP:GQ:PL	0/1:6,10:16:99:317,0,130	4	4.03693	4.29753	0.767202	4.24038	4.53465	3.9486
d225011	Ib	CG31705	FBgn0028490	-1	2L:11528165	0.727273	2L	11528165	T	C	AG	TRUE	11	239.6	AC=1;AF=0.500;AN=2;BaseQRankSum=1.317;DP=11;ExcessHet=3.0103;FS=0.000;MLEAC=1;MLEAF=0.500;MQ=60.00;MQRankSum=0.000;QD=21.78;ReadPosRankSum=0.886;SOR=0.693	GT:AD:DP:GQ:PL	0/1:3,8:11:70:247,0,70	4	4.03693	4.29753	0.767202	4.24038	4.53465	3.9486
d225011	Ib	Pex19	FBgn0032407	1	2L:12094295	0.5	2L	12094295	A	G	AG	TRUE	86	1304.6	AC=1;AF=0.500;AN=2;BaseQRankSum=2.048;DP=86;ExcessHet=3.0103;FS=2.866;MLEAC=1;MLEAF=0.500;MQ=60.00;MQRankSum=0.000;QD=15.17;ReadPosRankSum=-0.139;SOR=0.487	GT:AD:DP:GQ:PL	0/1:43,43:86:99:1312,0,1287	4	5.52679	4.58011	0.198542	3.35329	3.35545	3.9486
d225011	Ib	ThrRS	FBgn0027081	1	2L:12106021	0.948454	2L	12106021	A	G	AG	TRUE	97	3289.03	AC=2;AF=1.00;AN=2;BaseQRankSum=2.195;DP=97;ExcessHet=3.0103;FS=4.414;MLEAC=2;MLEAF=1.00;MQ=60.00;MQRankSum=0.000;QD=33.91;ReadPosRankSum=-2.333;SOR=0.222	GT:AD:DP:GQ:PL	1/1:5,92:97:99:3303,120,0	4	5.11791	5.14664	0.914631	2.22626	2.05694	3.9486
d225011	Ib	CG16974	FBgn0032479	-1	2L:13189312	0.740741	2L	13189312	T	C	AG	TRUE	81	1808.6	AC=1;AF=0.500;AN=2;BaseQRankSum=2.760;DP=81;ExcessHet=3.0103;FS=2.122;MLEAC=1;MLEAF=0.500;MQ=60.00;MQRankSum=0.000;QD=22.33;ReadPosRankSum=0.405;SOR=0.548	GT:AD:DP:GQ:PL	0/1:21,60:81:99:1816,0,431	4	3.8107	3.63081	0.755289	1.61977	1.51626	3.9486
d225011	Ib	nAChRalpha5	FBgn0028875	1	2L:14083516	1	2L	14083516	A	G	AG	TRUE	17	751.03	AC=2;AF=1.00;AN=2;DP=17;ExcessHet=3.0103;FS=0.000;MLEAC=2;MLEAF=1.00;MQ=60.00;QD=28.52;SOR=1.739	GT:AD:DP:GQ:PL	1/1:0,17:17:51:765,51,0	4	2.17311	2.13145	0.632364	0.0571794	0.030452	3.9486
d225011	Ib	nAChRalpha5	FBgn0028875	1	2L:14083517	1	2L	14083517	A	G	AG	TRUE	17	751.03	AC=2;AF=1.00;AN=2;DP=17;ExcessHet=3.0103;FS=0.000;MLEAC=2;MLEAF=1.00;MQ=60.00;QD=31.58;SOR=1.739	GT:AD:DP:GQ:PL	1/1:0,17:17:51:765,51,0	4	2.17311	2.13145	0.632364	0.0571794	0.030452	3.9486
d225011	Ib	nAChRalpha5	FBgn0028875	1	2L:14089204	1	2L	14089204	A	G	AG	TRUE	49	1743.03	AC=2;AF=1.00;AN=2;DP=49;ExcessHet=3.0103;FS=0.000;MLEAC=2;MLEAF=1.00;MQ=60.00;QD=30.96;SOR=2.448	GT:AD:DP:GQ:PL	1/1:0,49:49:99:1757,146,0	4	2.17311	2.13145	0.632364	0.0571794	0.030452	3.9486
d225011	Ib	nAChRalpha5	FBgn0028875	1	2L:14089221	0.698113	2L	14089221	A	G	AG	TRUE	53	1102.6	AC=1;AF=0.500;AN=2;BaseQRankSum=2.795;DP=53;ExcessHet=3.0103;FS=14.978;MLEAC=1;MLEAF=0.500;MQ=60.00;MQRankSum=0.000;QD=20.80;ReadPosRankSum=-1.316;SOR=2.203	GT:AD:DP:GQ:PL	0/1:16,37:53:99:1110,0,326	4	2.17311	2.13145	0.632364	0.0571794	0.030452	3.9486
d225011	Ib	nAChRalpha5	FBgn0028875	1	2L:14089236	0.365854	2L	14089236	A	G	AG	TRUE	41	400.6	AC=1;AF=0.500;AN=2;BaseQRankSum=3.349;DP=41;ExcessHet=3.0103;FS=6.747;MLEAC=1;MLEAF=0.500;MQ=60.00;MQRankSum=0.000;QD=9.77;ReadPosRankSum=-1.184;SOR=0.900	GT:AD:DP:GQ:PL	0/1:26,15:41:99:408,0,675	4	2.17311	2.13145	0.632364	0.0571794	0.030452	3.9486
d225011	Ib	nAChRalpha5	FBgn0028875	1	2L:14089246	1	2L	14089246	A	G	AG	TRUE	36	1326.03	AC=2;AF=1.00;AN=2;DP=36;ExcessHet=3.0103;FS=0.000;MLEAC=2;MLEAF=1.00;MQ=60.00;QD=31.79;SOR=0.927	GT:AD:DP:GQ:PL	1/1:0,36:36:99:1340,108,0	4	2.17311	2.13145	0.632364	0.0571794	0.030452	3.9486
d225011	Ib	chinmo	FBgn0086758	1	2L:1697095	0.369048	2L	1697095	A	G	AG	TRUE	84	724.6	AC=1;AF=0.500;AN=2;BaseQRankSum=1.389;DP=84;ExcessHet=3.0103;FS=16.880;MLEAC=1;MLEAF=0.500;MQ=60.00;MQRankSum=0.000;QD=8.63;ReadPosRankSum=-1.727;SOR=0.714	GT:AD:DP:GQ:PL	0/1:53,31:84:99:732,0,1412	4	4.89124	3.28942	2.254e-05	2.01378	1.91915	3.9486
d225011	Ib	fipi	FBgn0031627	-1	2L:4735173	0.2	2L	4735173	T	C	AG	TRUE	25	102.6	AC=1;AF=0.500;AN=2;BaseQRankSum=2.183;DP=25;ExcessHet=3.0103;FS=4.925;MLEAC=1;MLEAF=0.500;MQ=60.00;MQRankSum=0.000;QD=4.10;ReadPosRankSum=-0.034;SOR=1.938	GT:AD:DP:GQ:PL	0/1:20,5:25:99:110,0,631	4	5.70931	5.32823	0.250204	0.307762	0.421432	3.9486
d225011	Ib	CG31650	FBgn0031673	-1	2L:5042598	0.763158	2L	5042598	T	C	AG	TRUE	38	933.6	AC=1;AF=0.500;AN=2;BaseQRankSum=3.956;DP=38;ExcessHet=3.0103;FS=3.408;MLEAC=1;MLEAF=0.500;MQ=60.00;MQRankSum=0.000;QD=24.57;ReadPosRankSum=-0.138;SOR=0.302	GT:AD:DP:GQ:PL	0/1:9,29:38:99:941,0,154	4	4.95708	5.02313	0.952346	2.11362	1.73761	3.9486
d225011	Ib	Msp300	FBgn0261836	1	2L:5164694	0.2875	2L	5164694	A	G	AG	TRUE	80	564.6	AC=1;AF=0.500;AN=2;BaseQRankSum=3.364;DP=80;ExcessHet=3.0103;FS=1.146;MLEAC=1;MLEAF=0.500;MQ=60.00;MQRankSum=0.000;QD=7.06;ReadPosRankSum=0.448;SOR=0.424	GT:AD:DP:GQ:PL	0/1:57,23:80:99:572,0,1777	4	5.66863	5.5634	0.880478	3.31906	3.19027	3.9486
d225011	Ib	Msp300	FBgn0261836	1	2L:5206015	0.742857	2L	5206015	A	G	AG	TRUE	70	1984.6	AC=1;AF=0.500;AN=2;BaseQRankSum=4.082;DP=70;ExcessHet=3.0103;FS=23.399;MLEAC=1;MLEAF=0.500;MQ=60.00;MQRankSum=0.000;QD=28.35;ReadPosRankSum=0.819;SOR=1.593	GT:AD:DP:GQ:PL	0/1:18,52:70:99:1992,0,386	4	5.66863	5.5634	0.880478	3.31906	3.19027	3.9486
d225011	Ib	Msp300	FBgn0261836	1	2L:5206020	0.289157	2L	5206020	A	G	AG	TRUE	83	644.6	AC=1;AF=0.500;AN=2;BaseQRankSum=4.914;DP=83;ExcessHet=3.0103;FS=15.202;MLEAC=1;MLEAF=0.500;MQ=60.00;MQRankSum=0.000;QD=7.77;ReadPosRankSum=-1.423;SOR=1.057	GT:AD:DP:GQ:PL	0/1:59,24:83:99:652,0,1857	4	5.66863	5.5634	0.880478	3.31906	3.19027	3.9486
d225011	Ib	nrv2	FBgn0015777	-1	2L:6789976	0.471074	2L	6789976	T	C	AG	TRUE	121	1716.6	AC=1;AF=0.500;AN=2;BaseQRankSum=5.504;DP=121;ExcessHet=3.0103;FS=4.604;MLEAC=1;MLEAF=0.500;MQ=60.00;MQRankSum=0.000;QD=14.19;ReadPosRankSum=0.606;SOR=1.300	GT:AD:DP:GQ:PL	0/1:64,57:121:99:1724,0,1838	4	3.48474	2.11119	0.017969	1.38147	1.80436	3.9486
d225011	Ib	Nckx30C	FBgn0028704	-1	2L:9733349	1	2L	9733349	T	C	AG	TRUE	12	373.02	AC=2;AF=1.00;AN=2;DP=12;ExcessHet=3.0103;FS=0.000;MLEAC=2;MLEAF=1.00;MQ=60.00;QD=31.09;SOR=0.693	GT:AD:DP:GQ:PL	1/1:0,12:12:36:387,36,0	4	4.99389	4.09503	0.0412382	0.0832012	0.108464	3.9486
d225011	Ib	14-3-3zeta	FBgn0004907	1	2R:10108801	0.15	2R	10108801	A	G	AG	TRUE	180	528.6	AC=1;AF=0.500;AN=2;BaseQRankSum=2.921;DP=180;ExcessHet=3.0103;FS=0.831;MLEAC=1;MLEAF=0.500;MQ=60.00;MQRankSum=0.000;QD=2.94;ReadPosRankSum=-1.096;SOR=0.520	GT:AD:DP:GQ:PL	0/1:153,27:180:99:536,0,4970	4	10.0161	10.0638	0.920612	8.20641	7.91397	3.9486
d225011	Ib	14-3-3zeta	FBgn0004907	1	2R:10108802	0.19774	2R	10108802	A	G	AG	TRUE	177	796.6	AC=1;AF=0.500;AN=2;BaseQRankSum=2.383;DP=177;ExcessHet=3.0103;FS=1.585;MLEAC=1;MLEAF=0.500;MQ=60.00;MQRankSum=0.000;QD=4.50;ReadPosRankSum=-0.177;SOR=0.905	GT:AD:DP:GQ:PL	0/1:142,35:177:99:804,0,4534	4	10.0161	10.0638	0.920612	8.20641	7.91397	3.9486
d225011	Ib	RpS15Ab	FBgn0033555	1	2R:10822219	0.14	2R	10822219	A	G	AG	TRUE	50	154.6	AC=1;AF=0.500;AN=2;BaseQRankSum=1.939;DP=50;ExcessHet=3.0103;FS=23.682;MLEAC=1;MLEAF=0.500;MQ=60.00;MQRankSum=0.000;QD=3.09;ReadPosRankSum=-0.295;SOR=2.516	GT:AD:DP:GQ:PL	0/1:43,7:50:99:162,0,1670	4	3.76529	3.1313	0.134754	5.69163	5.75158	3.9486
d225011	Ib	RpS15Ab	FBgn0033555	1	2R:10822309	0.409091	2R	10822309	A	G	AG	TRUE	44	501.6	AC=1;AF=0.500;AN=2;BaseQRankSum=-2.195;DP=44;ExcessHet=3.0103;FS=83.798;MLEAC=1;MLEAF=0.500;MQ=60.00;MQRankSum=0.000;QD=11.40;ReadPosRankSum=-2.119;SOR=4.395	GT:AD:DP:GQ:PL	0/1:26,18:44:99:509,0,723	4	3.76529	3.1313	0.134754	5.69163	5.75158	3.9486
d225011	Ib	CG3955	FBgn0033793	-1	2R:13128147	0.4	2R	13128147	T	C	AG	TRUE	80	890.6	AC=1;AF=0.500;AN=2;BaseQRankSum=3.878;DP=80;ExcessHet=3.0103;FS=6.617;MLEAC=1;MLEAF=0.500;MQ=60.00;MQRankSum=0.000;QD=11.13;ReadPosRankSum=0.010;SOR=1.603	GT:AD:DP:GQ:PL	0/1:48,32:80:99:898,0,1406	4	4.54626	4.75042	0.982538	0.118374	0.14535	3.9486
d225011	Ib	CG6329	FBgn0033872	1	2R:13832057	0.577778	2R	13832057	A	G	AG	TRUE	135	3085.6	AC=1;AF=0.500;AN=2;BaseQRankSum=5.143;DP=135;ExcessHet=3.0103;FS=19.390;MLEAC=1;MLEAF=0.500;MQ=60.00;MQRankSum=0.000;QD=22.86;ReadPosRankSum=-3.246;SOR=1.957	GT:AD:DP:GQ:PL	0/1:57,78:135:99:3093,0,2182	4	6.30782	5.19838	0.0246684	0.326178	0.229277	3.9486
d225011	Ib	CG6329	FBgn0033872	1	2R:13832539	0.54386	2R	13832539	A	G	AG	TRUE	57	962.6	AC=1;AF=0.500;AN=2;BaseQRankSum=5.173;DP=57;ExcessHet=3.0103;FS=2.316;MLEAC=1;MLEAF=0.500;MQ=60.00;MQRankSum=0.000;QD=16.89;ReadPosRankSum=1.190;SOR=0.426	GT:AD:DP:GQ:PL	0/1:26,31:57:99:970,0,688	4	6.30782	5.19838	0.0246684	0.326178	0.229277	3.9486
d225011	Ib	ReepB	FBgn0033906	1	2R:14172781	0.39485	2R	14172781	A	G	AG	TRUE	233	2595.6	AC=1;AF=0.500;AN=2;BaseQRankSum=5.820;DP=233;ExcessHet=3.0103;FS=5.295;MLEAC=1;MLEAF=0.500;MQ=60.00;MQRankSum=0.000;QD=11.14;ReadPosRankSum=-0.652;SOR=0.367	GT:AD:DP:GQ:PL	0/1:141,92:233:99:2603,0,4049	4	8.82339	8.47452	0.973655	7.40431	7.35215	3.9486
d225011	Ib	ReepB	FBgn0033906	1	2R:14172820	0.413146	2R	14172820	A	G	AG	TRUE	213	2654.6	AC=1;AF=0.500;AN=2;BaseQRankSum=9.656;DP=213;ExcessHet=3.0103;FS=7.611;MLEAC=1;MLEAF=0.500;MQ=60.00;MQRankSum=0.000;QD=12.46;ReadPosRankSum=1.210;SOR=0.287	GT:AD:DP:GQ:PL	0/1:125,88:213:99:2662,0,3183	4	8.82339	8.47452	0.973655	7.40431	7.35215	3.9486
d225011	Ib	mRpS16	FBgn0033907	-1	2R:14173081	0.292683	2R	14173081	T	C	AG	TRUE	41	463.6	AC=1;AF=0.500;AN=2;BaseQRankSum=1.419;DP=41;ExcessHet=3.0103;FS=2.968;MLEAC=1;MLEAF=0.500;MQ=60.00;MQRankSum=0.000;QD=11.31;ReadPosRankSum=0.796;SOR=0.158	GT:AD:DP:GQ:PL	0/1:29,12:41:99:471,0,1109	4	2.9769	2.95758	0.828541	2.15934	1.92185	3.9486
d225011	Ib	Opa1	FBgn0261276	-1	2R:14234798	0.882353	2R	14234798	T	C	AG	TRUE	17	373.6	AC=1;AF=0.500;AN=2;BaseQRankSum=-0.231;DP=17;ExcessHet=3.0103;FS=8.113;MLEAC=1;MLEAF=0.500;MQ=60.00;MQRankSum=0.000;QD=21.98;ReadPosRankSum=-1.058;SOR=1.245	GT:AD:DP:GQ:PL	0/1:2,15:17:22:381,0,22	4	2.40495	3.13511	0.394098	1.90917	1.64868	3.9486
d225011	Ib	CG8405	FBgn0034071	1	2R:16048343	1	2R	16048343	A	G	AG	TRUE	24	1013.03	AC=2;AF=1.00;AN=2;DP=24;ExcessHet=3.0103;FS=0.000;MLEAC=2;MLEAF=1.00;MQ=60.00;QD=33.13;SOR=1.270	GT:AD:DP:GQ:PL	1/1:0,24:24:72:1027,72,0	4	2.53302	2.65448	0.692047	1.04381	0.98824	3.9486
d225011	Ib	Xbp1	FBgn0021872	1	2R:21145178	0.191781	2R	21145178	A	G	AG	TRUE	73	274.6	AC=1;AF=0.500;AN=2;BaseQRankSum=4.497;DP=73;ExcessHet=3.0103;FS=11.515;MLEAC=1;MLEAF=0.500;MQ=60.00;MQRankSum=0.000;QD=3.76;ReadPosRankSum=0.063;SOR=1.130	GT:AD:DP:GQ:PL	0/1:59,14:73:99:282,0,1589	4	6.37675	5.94381	0.755289	5.67561	5.11164	3.9486
d225011	Ib	CG13506	FBgn0034723	1	2R:22391510	0.444444	2R	22391510	A	G	AG	TRUE	18	243.6	AC=1;AF=0.500;AN=2;BaseQRankSum=2.957;DP=18;ExcessHet=3.0103;FS=0.000;MLEAC=1;MLEAF=0.500;MQ=60.00;MQRankSum=0.000;QD=13.53;ReadPosRankSum=-1.561;SOR=0.412	GT:AD:DP:GQ:PL	0/1:10,8:18:99:251,0,280	4	4.13675	4.31975	0.246252	0.498164	0.623232	3.9486
d225011	Ib	CG14591	FBgn0033054	-1	2R:6037128	0.488372	2R	6037128	T	C	AG	TRUE	43	654.6	AC=1;AF=0.500;AN=2;BaseQRankSum=2.929;DP=43;ExcessHet=3.0103;FS=4.591;MLEAC=1;MLEAF=0.500;MQ=60.00;MQRankSum=0.000;QD=15.22;ReadPosRankSum=-0.870;SOR=0.252	GT:AD:DP:GQ:PL	0/1:22,21:43:99:662,0,655	4	4.47495	4.49171	0.904654	0.132465	0.0680559	3.9486
d225011	Ib	Vha16-1	FBgn0262736	-1	2R:6626169	0.108108	2R	6626169	T	C	AG	TRUE	148	95.6	AC=1;AF=0.500;AN=2;BaseQRankSum=3.134;DP=148;ExcessHet=3.0103;FS=7.621;MLEAC=1;MLEAF=0.500;MQ=60.00;MQRankSum=0.000;QD=0.65;ReadPosRankSum=0.263;SOR=0.639	GT:AD:DP:GQ:PL	0/1:132,16:148:99:103,0,4415	4	8.42356	8.78145	0.297901	6.11325	6.08202	3.9486
d225011	Ib	CSN4	FBgn0027054	1	2R:7973697	1	2R	7973697	A	G	AG	TRUE	12	400.02	AC=2;AF=1.00;AN=2;DP=12;ExcessHet=3.0103;FS=0.000;MLEAC=2;MLEAF=1.00;MQ=60.00;QD=33.34;SOR=1.981	GT:AD:DP:GQ:PL	1/1:0,12:12:36:414,36,0	4	2.71701	2.92813	0.927838	3.57475	3.3122	3.9486
d225011	Ib	Lpin	FBgn0263593	-1	2R:8143056	1	2R	8143056	T	C	AG	TRUE	13	466.02	AC=2;AF=1.00;AN=2;DP=13;ExcessHet=3.0103;FS=0.000;MLEAC=2;MLEAF=1.00;MQ=60.00;QD=28.43;SOR=0.836	GT:AD:DP:GQ:PL	1/1:0,13:13:39:480,39,0	4	4.39667	5.07773	0.241101	2.14187	1.82211	3.9486
d225011	Ib	Gbs-76A	FBgn0036862	-1	3L:19283264	0.354839	3L	19283264	T	C	AG	TRUE	31	301.6	AC=1;AF=0.500;AN=2;BaseQRankSum=2.186;DP=31;ExcessHet=3.0103;FS=1.702;MLEAC=1;MLEAF=0.500;MQ=60.00;MQRankSum=0.000;QD=9.73;ReadPosRankSum=-0.477;SOR=0.363	GT:AD:DP:GQ:PL	0/1:20,11:31:99:309,0,507	4	2.62452	1.40716	0.00204643	3.06808	2.85648	3.9486
d225011	Ib	Shab	FBgn0262593	1	3L:2925255	1	3L	2925255	A	G	AG	TRUE	25	871.03	AC=2;AF=1.00;AN=2;DP=25;ExcessHet=3.0103;FS=0.000;MLEAC=2;MLEAF=1.00;MQ=60.00;QD=34.84;SOR=0.941	GT:AD:DP:GQ:PL	1/1:0,25:25:75:885,75,0	4	3.60169	2.82872	0.0568977	0.796233	0.656306	3.9486
d225011	Ib	Shab	FBgn0262593	1	3L:2941132	1	3L	2941132	A	G	AG	TRUE	25	1111.03	AC=2;AF=1.00;AN=2;DP=25;ExcessHet=3.0103;FS=0.000;MLEAC=2;MLEAF=1.00;MQ=60.00;QD=31.71;SOR=1.136	GT:AD:DP:GQ:PL	1/1:0,25:25:75:1125,75,0	4	3.60169	2.82872	0.0568977	0.796233	0.656306	3.9486
d225011	Ib	Shab	FBgn0262593	1	3L:2941312	1	3L	2941312	A	G	AG	TRUE	19	726.03	AC=2;AF=1.00;AN=2;DP=19;ExcessHet=3.0103;FS=0.000;MLEAC=2;MLEAF=1.00;MQ=60.00;QD=31.24;SOR=2.419	GT:AD:DP:GQ:PL	1/1:0,19:19:57:740,57,0	4	3.60169	2.82872	0.0568977	0.796233	0.656306	3.9486
d225011	Ib	Shab	FBgn0262593	1	3L:2941364	1	3L	2941364	A	G	AG	TRUE	35	1246.03	AC=2;AF=1.00;AN=2;DP=35;ExcessHet=3.0103;FS=0.000;MLEAC=2;MLEAF=1.00;MQ=60.00;QD=28.04;SOR=1.002	GT:AD:DP:GQ:PL	1/1:0,35:35:99:1260,105,0	4	3.60169	2.82872	0.0568977	0.796233	0.656306	3.9486
d225011	Ib	Shab	FBgn0262593	1	3L:2941396	0.475	3L	2941396	A	G	AG	TRUE	40	601.6	AC=1;AF=0.500;AN=2;BaseQRankSum=5.378;DP=40;ExcessHet=3.0103;FS=12.215;MLEAC=1;MLEAF=0.500;MQ=60.00;MQRankSum=0.000;QD=15.04;ReadPosRankSum=1.386;SOR=0.058	GT:AD:DP:GQ:PL	0/1:21,19:40:99:609,0,556	4	3.60169	2.82872	0.0568977	0.796233	0.656306	3.9486
d225011	Ib	Shab	FBgn0262593	1	3L:2941426	1	3L	2941426	A	G	AG	TRUE	36	1271.03	AC=2;AF=1.00;AN=2;DP=36;ExcessHet=3.0103;FS=0.000;MLEAC=2;MLEAF=1.00;MQ=60.00;QD=27.51;SOR=3.383	GT:AD:DP:GQ:PL	1/1:0,36:36:99:1285,108,0	4	3.60169	2.82872	0.0568977	0.796233	0.656306	3.9486
d225011	Ib	nAChRbeta1	FBgn0000038	1	3L:4429963	0.606061	3L	4429963	A	G	AG	TRUE	33	717.6	AC=1;AF=0.500;AN=2;BaseQRankSum=4.673;DP=33;ExcessHet=3.0103;FS=0.000;MLEAC=1;MLEAF=0.500;MQ=60.00;MQRankSum=0.000;QD=21.75;ReadPosRankSum=1.333;SOR=0.663	GT:AD:DP:GQ:PL	0/1:13,20:33:99:725,0,349	4	6.35534	5.5438	0.188032	0.118617	0.0901246	3.9486
d225011	Ib	nAChRbeta1	FBgn0000038	1	3L:4430208	0.222222	3L	4430208	A	G	AG	TRUE	27	98.6	AC=1;AF=0.500;AN=2;BaseQRankSum=-1.057;DP=27;ExcessHet=3.0103;FS=8.671;MLEAC=1;MLEAF=0.500;MQ=60.00;MQRankSum=0.000;QD=3.65;ReadPosRankSum=-0.645;SOR=1.066	GT:AD:DP:GQ:PL	0/1:21,6:27:99:106,0,613	4	6.35534	5.5438	0.188032	0.118617	0.0901246	3.9486
d225011	Ib	nAChRbeta1	FBgn0000038	1	3L:4432487	0.26087	3L	4432487	A	G	AG	TRUE	46	307.6	AC=1;AF=0.500;AN=2;BaseQRankSum=0.827;DP=46;ExcessHet=3.0103;FS=2.937;MLEAC=1;MLEAF=0.500;MQ=60.00;MQRankSum=0.000;QD=6.69;ReadPosRankSum=-1.183;SOR=1.279	GT:AD:DP:GQ:PL	0/1:34,12:46:99:315,0,1013	4	6.35534	5.5438	0.188032	0.118617	0.0901246	3.9486
d225011	Ib	EndoA	FBgn0038659	1	3R:18907652	0.666667	3R	18907652	A	G	AG	TRUE	21	531.6	AC=1;AF=0.500;AN=2;BaseQRankSum=0.154;DP=21;ExcessHet=3.0103;FS=0.000;MLEAC=1;MLEAF=0.500;MQ=60.00;MQRankSum=0.000;QD=25.31;ReadPosRankSum=0.374;SOR=1.022	GT:AD:DP:GQ:PL	0/1:7,14:21:99:539,0,230	4	4.7728	5.29408	0.154643	0.85352	0.843628	3.9486
d225011	Ib	EndoA	FBgn0038659	1	3R:18907675	0.7	3R	18907675	A	G	AG	TRUE	20	528.6	AC=1;AF=0.500;AN=2;BaseQRankSum=2.134;DP=20;ExcessHet=3.0103;FS=1.922;MLEAC=1;MLEAF=0.500;MQ=60.00;MQRankSum=0.000;QD=26.43;ReadPosRankSum=-0.083;SOR=1.329	GT:AD:DP:GQ:PL	0/1:6,14:20:99:536,0,232	4	4.7728	5.29408	0.154643	0.85352	0.843628	3.9486
d225011	Ib	EndoA	FBgn0038659	1	3R:18909164	0.352941	3R	18909164	A	G	AG	TRUE	34	320.6	AC=1;AF=0.500;AN=2;BaseQRankSum=3.295;DP=34;ExcessHet=3.0103;FS=3.356;MLEAC=1;MLEAF=0.500;MQ=60.00;MQRankSum=0.000;QD=9.43;ReadPosRankSum=0.796;SOR=0.223	GT:AD:DP:GQ:PL	0/1:22,12:34:99:328,0,519	4	4.7728	5.29408	0.154643	0.85352	0.843628	3.9486
d225011	Ib	EndoA	FBgn0038659	1	3R:18910153	0.171429	3R	18910153	A	G	AG	TRUE	35	91.6	AC=1;AF=0.500;AN=2;BaseQRankSum=1.602;DP=35;ExcessHet=3.0103;FS=7.095;MLEAC=1;MLEAF=0.500;MQ=60.00;MQRankSum=0.000;QD=2.62;ReadPosRankSum=0.527;SOR=0.059	GT:AD:DP:GQ:PL	0/1:29,6:35:99:99,0,848	4	4.7728	5.29408	0.154643	0.85352	0.843628	3.9486
d225011	Ib	Xrp1	FBgn0261113	1	3R:18918354	0.208333	3R	18918354	A	G	AG	TRUE	24	84.6	AC=1;AF=0.500;AN=2;BaseQRankSum=0.337;DP=24;ExcessHet=3.0103;FS=0.000;MLEAC=1;MLEAF=0.500;MQ=60.00;MQRankSum=0.000;QD=3.53;ReadPosRankSum=-0.855;SOR=0.693	GT:AD:DP:GQ:PL	0/1:19,5:24:92:92,0,518	4	6.93525	6.63308	0.99582	5.49922	5.49918	3.9486
d225011	Ib	vib	FBgn0267975	-1	3R:19226523	0.782609	3R	19226523	T	C	AG	TRUE	23	556.6	AC=1;AF=0.500;AN=2;BaseQRankSum=2.053;DP=23;ExcessHet=3.0103;FS=5.656;MLEAC=1;MLEAF=0.500;MQ=60.00;MQRankSum=0.000;QD=24.20;ReadPosRankSum=-0.674;SOR=0.061	GT:AD:DP:GQ:PL	0/1:5,18:23:58:564,0,58	4	5.02601	5.14846	0.946513	3.41525	3.2449	3.9486
d225011	Ib	Atpalpha	FBgn0002921	1	3R:20964328	0.152778	3R	20964328	A	G	AG	TRUE	216	471.6	AC=1;AF=0.500;AN=2;BaseQRankSum=3.107;DP=216;ExcessHet=3.0103;FS=7.326;MLEAC=1;MLEAF=0.500;MQ=60.00;MQRankSum=0.000;QD=2.18;ReadPosRankSum=0.517;SOR=1.346	GT:AD:DP:GQ:PL	0/1:183,33:216:99:479,0,5581	4	9.18942	9.08294	0.418439	4.40032	4.50151	3.9486
d225011	Ib	Rlip	FBgn0026056	1	3R:21020562	1	3R	21020562	A	G	AG	TRUE	25	903.03	AC=2;AF=1.00;AN=2;DP=25;ExcessHet=3.0103;FS=0.000;MLEAC=2;MLEAF=1.00;MQ=60.00;QD=31.31;SOR=2.215	GT:AD:DP:GQ:PL	1/1:0,25:25:75:917,75,0	4	1.73807	2.13756	0.804143	0.464341	0.479873	3.9486
d225011	Ib	Cow	FBgn0039054	-1	3R:23112549	0.303571	3R	23112549	T	C	AG	TRUE	56	415.6	AC=1;AF=0.500;AN=2;BaseQRankSum=2.596;DP=56;ExcessHet=3.0103;FS=6.157;MLEAC=1;MLEAF=0.500;MQ=60.00;MQRankSum=0.000;QD=7.42;ReadPosRankSum=1.333;SOR=1.596	GT:AD:DP:GQ:PL	0/1:39,17:56:99:423,0,1243	4	6.07048	6.14794	0.757327	0.0371922	0.0664222	3.9486
d225011	Ib	ATPsynCF6	FBgn0016119	-1	3R:23355357	0.664804	3R	23355357	T	C	AG	TRUE	179	3483.6	AC=1;AF=0.500;AN=2;BaseQRankSum=5.051;DP=179;ExcessHet=3.0103;FS=2.292;MLEAC=1;MLEAF=0.500;MQ=60.00;MQRankSum=0.000;QD=19.46;ReadPosRankSum=-0.062;SOR=0.932	GT:AD:DP:GQ:PL	0/1:60,119:179:99:3491,0,1437	4	9.01907	8.99728	0.563116	8.34196	8.52202	3.9486
d225011	Ib	Gdh	FBgn0001098	-1	3R:23936205	0.53913	3R	23936205	T	C	AG	TRUE	115	1815.6	AC=1;AF=0.500;AN=2;BaseQRankSum=5.320;DP=115;ExcessHet=3.0103;FS=2.372;MLEAC=1;MLEAF=0.500;MQ=60.00;MQRankSum=0.000;QD=15.79;ReadPosRankSum=1.162;SOR=0.509	GT:AD:DP:GQ:PL	0/1:53,62:115:99:1823,0,1314	4	6.73636	5.26871	0.00814535	4.37474	4.57326	3.9486
d225011	Ib	slo	FBgn0003429	1	3R:24707423	1	3R	24707423	A	G	AG	TRUE	26	836.03	AC=2;AF=1.00;AN=2;DP=26;ExcessHet=3.0103;FS=0.000;MLEAC=2;MLEAF=1.00;MQ=60.00;QD=32.15;SOR=0.846	GT:AD:DP:GQ:PL	1/1:0,26:26:77:850,77,0	4	3.31874	4.49559	0.310436	1.1716	0.687207	3.9486
d225011	Ib	slo	FBgn0003429	1	3R:24708329	0.324675	3R	24708329	A	G	AG	TRUE	77	573.6	AC=1;AF=0.500;AN=2;BaseQRankSum=2.914;DP=77;ExcessHet=3.0103;FS=22.915;MLEAC=1;MLEAF=0.500;MQ=60.00;MQRankSum=0.000;QD=7.45;ReadPosRankSum=2.022;SOR=3.098	GT:AD:DP:GQ:PL	0/1:52,25:77:99:581,0,2242	4	3.31874	4.49559	0.310436	1.1716	0.687207	3.9486
d225011	Ib	slo	FBgn0003429	1	3R:24708330	0.272727	3R	24708330	A	G	AG	TRUE	77	524.6	AC=1;AF=0.500;AN=2;BaseQRankSum=4.389;DP=77;ExcessHet=3.0103;FS=7.305;MLEAC=1;MLEAF=0.500;MQ=60.00;MQRankSum=0.000;QD=6.81;ReadPosRankSum=-1.019;SOR=0.216	GT:AD:DP:GQ:PL	0/1:56,21:77:99:532,0,2370	4	3.31874	4.49559	0.310436	1.1716	0.687207	3.9486
d225011	Ib	Ald1	FBgn0000064	-1	3R:26254245	0.588529	3R	26254245	T	C	AG	TRUE	401	7043.6	AC=1;AF=0.500;AN=2;BaseQRankSum=7.615;DP=401;ExcessHet=3.0103;FS=9.365;MLEAC=1;MLEAF=0.500;MQ=60.00;MQRankSum=0.000;QD=17.57;ReadPosRankSum=-1.327;SOR=1.306	GT:AD:DP:GQ:PL	0/1:165,236:401:99:7051,0,4233	4	11.4026	10.0568	0.0414265	10.8637	11.1339	3.9486
d225011	Ib	Ald1	FBgn0000064	-1	3R:26254381	0.546638	3R	26254381	T	C	AG	TRUE	461	7920.6	AC=1;AF=0.500;AN=2;BaseQRankSum=10.357;DP=461;ExcessHet=3.0103;FS=6.983;MLEAC=1;MLEAF=0.500;MQ=60.00;MQRankSum=0.000;QD=17.18;ReadPosRankSum=1.898;SOR=1.085	GT:AD:DP:GQ:PL	0/1:209,252:461:99:7928,0,5605	4	11.4026	10.0568	0.0414265	10.8637	11.1339	3.9486
d225011	Ib	TfIIA-L	FBgn0011289	1	3R:27255644	0.991071	3R	27255644	A	G	AG	TRUE	112	4858.03	AC=2;AF=1.00;AN=2;BaseQRankSum=1.168;DP=112;ExcessHet=3.0103;FS=0.000;MLEAC=2;MLEAF=1.00;MQ=60.00;MQRankSum=0.000;QD=28.79;ReadPosRankSum=0.436;SOR=0.230	GT:AD:DP:GQ:PL	1/1:1,111:112:99:4872,310,0	4	2.98054	3.12474	0.877624	2.55085	2.08212	3.9486
d225011	Ib	Hmu	FBgn0015737	1	3R:27290230	1	3R	27290230	A	G	AG	TRUE	88	3193.03	AC=2;AF=1.00;AN=2;DP=88;ExcessHet=3.0103;FS=0.000;MLEAC=2;MLEAF=1.00;MQ=60.00;QD=28.57;SOR=0.887	GT:AD:DP:GQ:PL	1/1:0,88:88:99:3207,263,0	4	5.87173	5.77395	0.390105	2.59234	2.73469	3.9486
d225011	Ib	Gp93	FBgn0039562	1	3R:27951705	1	3R	27951705	A	G	AG	TRUE	35	1564.03	AC=2;AF=1.00;AN=2;DP=35;ExcessHet=3.0103;FS=0.000;MLEAC=2;MLEAF=1.00;MQ=60.00;QD=29.62;SOR=1.002	GT:AD:DP:GQ:PL	1/1:0,35:35:99:1578,108,0	4	5.46458	5.53278	0.962357	2.74479	2.53149	3.9486
d225011	Ib	betaTub97EF	FBgn0003890	-1	3R:27967290	1	3R	27967290	T	C	AG	TRUE	12	515.02	AC=2;AF=1.00;AN=2;DP=12;ExcessHet=3.0103;FS=0.000;MLEAC=2;MLEAF=1.00;MQ=60.00;QD=35.29;SOR=0.693	GT:AD:DP:GQ:PL	1/1:0,12:12:36:529,36,0	4	0.831406	0.24625	8.04814e-05	1.51149	1.698	3.9486
d225011	Ib	betaTub97EF	FBgn0003890	-1	3R:27967292	1	3R	27967292	T	C	AG	TRUE	12	515.02	AC=2;AF=1.00;AN=2;DP=12;ExcessHet=3.0103;FS=0.000;MLEAC=2;MLEAF=1.00;MQ=60.00;QD=30.18;SOR=0.693	GT:AD:DP:GQ:PL	1/1:0,12:12:36:529,36,0	4	0.831406	0.24625	8.04814e-05	1.51149	1.698	3.9486
d225011	Ib	Pkc98E	FBgn0003093	1	3R:29046298	0.765957	3R	29046298	A	G	AG	TRUE	47	1441.6	AC=1;AF=0.500;AN=2;BaseQRankSum=-0.587;DP=47;ExcessHet=3.0103;FS=3.103;MLEAC=1;MLEAF=0.500;MQ=60.00;MQRankSum=0.000;QD=30.67;ReadPosRankSum=1.751;SOR=1.127	GT:AD:DP:GQ:PL	0/1:11,36:47:99:1449,0,510	4	4.42269	4.69937	0.833844	1.73884	1.5978	3.9486
d225011	Ib	jus	FBgn0039647	-1	3R:29172906	0.405797	3R	29172906	T	C	AG	TRUE	69	1024.6	AC=1;AF=0.500;AN=2;BaseQRankSum=-0.875;DP=69;ExcessHet=3.0103;FS=0.000;MLEAC=1;MLEAF=0.500;MQ=60.00;MQRankSum=0.000;QD=14.85;ReadPosRankSum=-2.716;SOR=0.616	GT:AD:DP:GQ:PL	0/1:41,28:69:99:1032,0,1637	4	5.26612	7.39983	8.31329e-16	0.167237	0.158941	3.9486
d225011	Ib	Cnx99A	FBgn0015622	-1	3R:29316804	0.342466	3R	29316804	T	C	AG	TRUE	73	964.6	AC=1;AF=0.500;AN=2;BaseQRankSum=3.854;DP=73;ExcessHet=3.0103;FS=2.128;MLEAC=1;MLEAF=0.500;MQ=60.00;MQRankSum=0.000;QD=13.21;ReadPosRankSum=0.791;SOR=0.402	GT:AD:DP:GQ:PL	0/1:48,25:73:99:972,0,2015	4	5.37514	5.28525	0.729489	2.58793	2.27049	3.9486
d225011	Ib	Cnx99A	FBgn0015622	-1	3R:29316843	0.316327	3R	29316843	T	C	AG	TRUE	98	1053.6	AC=1;AF=0.500;AN=2;BaseQRankSum=4.772;DP=98;ExcessHet=3.0103;FS=15.084;MLEAC=1;MLEAF=0.500;MQ=60.00;MQRankSum=0.000;QD=10.75;ReadPosRankSum=-1.218;SOR=1.261	GT:AD:DP:GQ:PL	0/1:67,31:98:99:1061,0,2514	4	5.37514	5.28525	0.729489	2.58793	2.27049	3.9486
d225011	Ib	Ptp99A	FBgn0004369	1	3R:29483303	0.923077	3R	29483303	A	G	AG	TRUE	52	1684.93	AC=2;AF=1.00;AN=2;BaseQRankSum=2.087;DP=52;ExcessHet=3.0103;FS=0.000;MLEAC=2;MLEAF=1.00;MQ=60.00;MQRankSum=0.000;QD=32.40;ReadPosRankSum=-0.552;SOR=1.107	GT:AD:DP:GQ:PL	1/1:4,48:52:18:1699,18,0	4	4.34922	4.16541	0.576197	1.29803	1.03192	3.9486
d225011	Ib	kay	FBgn0001297	1	3R:29794088	0.466667	3R	29794088	A	G	AG	TRUE	46	562.6	AC=1;AF=0.500;AN=2;BaseQRankSum=2.257;DP=46;ExcessHet=3.0103;FS=10.281;MLEAC=1;MLEAF=0.500;MQ=60.00;MQRankSum=0.000;QD=12.50;ReadPosRankSum=3.158;SOR=0.035	GT:AD:DP:GQ:PL	0/1:24,21:45:99:570,0,656	4	5.08707	5.90756	0.125239	4.66592	4.33526	3.9486
d225011	Ib	RpS8	FBgn0039713	1	3R:29863650	0.740741	3R	29863650	A	G	AG	TRUE	27	612.6	AC=1;AF=0.500;AN=2;BaseQRankSum=0.140;DP=27;ExcessHet=3.0103;FS=5.699;MLEAC=1;MLEAF=0.500;MQ=60.00;MQRankSum=0.000;QD=22.69;ReadPosRankSum=0.471;SOR=2.400	GT:AD:DP:GQ:PL	0/1:7,20:27:99:620,0,173	4	12.4079	12.3182	0.473228	11.7965	11.7074	3.9486
d225011	Ib	VhaAC45RP	FBgn0051030	-1	3R:30165949	0.170732	3R	30165949	T	C	AG	TRUE	205	772.6	AC=1;AF=0.500;AN=2;BaseQRankSum=1.756;DP=205;ExcessHet=3.0103;FS=0.000;MLEAC=1;MLEAF=0.500;MQ=60.00;MQRankSum=0.000;QD=3.77;ReadPosRankSum=1.206;SOR=0.629	GT:AD:DP:GQ:PL	0/1:170,35:205:99:780,0,6644	4	6.3392	6.42463	0.721484	0.410326	0.49666	3.9486
d225011	Ib	VhaAC45RP	FBgn0051030	-1	3R:30166167	0.141791	3R	30166167	T	C	AG	TRUE	134	419.6	AC=1;AF=0.500;AN=2;BaseQRankSum=5.048;DP=134;ExcessHet=3.0103;FS=0.927;MLEAC=1;MLEAF=0.500;MQ=60.00;MQRankSum=0.000;QD=3.13;ReadPosRankSum=0.960;SOR=0.748	GT:AD:DP:GQ:PL	0/1:115,19:134:99:427,0,4926	4	6.3392	6.42463	0.721484	0.410326	0.49666	3.9486
d225011	Ib	CG9743	FBgn0039756	-1	3R:30198612	0.652174	3R	30198612	T	C	AG	TRUE	48	651.04	AC=1;AF=0.500;AN=2;BaseQRankSum=-0.183;DP=48;ExcessHet=3.0103;FS=16.026;MLEAC=1;MLEAF=0.500;MQ=60.00;MQRankSum=0.000;QD=14.15;ReadPosRankSum=1.054;SOR=1.074	GT:AD:DP:GQ:PL	0/1:16,30:46:99:870,0,416	4	2.09625	3.69448	0.234003	1.02718	1.08195	3.9486
d225011	Ib	CycG	FBgn0039858	-1	3R:31601551	0.42	3R	31601551	T	C	AG	TRUE	50	576.6	AC=1;AF=0.500;AN=2;BaseQRankSum=1.053;DP=50;ExcessHet=3.0103;FS=0.000;MLEAC=1;MLEAF=0.500;MQ=60.00;MQRankSum=0.000;QD=11.53;ReadPosRankSum=-0.306;SOR=0.724	GT:AD:DP:GQ:PL	0/1:29,21:50:99:584,0,890	4	6.749	7.09638	0.463947	5.43584	5.80647	3.9486
d225011	Ib	cpx	FBgn0041605	1	3R:4297504	0.525316	3R	4297504	A	G	AG	TRUE	161	2519.6	AC=1;AF=0.500;AN=2;BaseQRankSum=5.929;DP=161;ExcessHet=3.0103;FS=6.830;MLEAC=1;MLEAF=0.500;MQ=60.00;MQRankSum=0.000;QD=15.95;ReadPosRankSum=1.556;SOR=1.379	GT:AD:DP:GQ:PL	0/1:75,83:158:99:2527,0,2151	4	7.90852	7.29727	0.637321	0.177459	0.228242	3.9486
d225011	Ib	cpx	FBgn0041605	1	3R:4297518	0.128617	3R	4297518	A	G	AG	TRUE	311	501.6	AC=1;AF=0.500;AN=2;BaseQRankSum=0.167;DP=311;ExcessHet=3.0103;FS=10.128;MLEAC=1;MLEAF=0.500;MQ=60.00;MQRankSum=0.000;QD=1.61;ReadPosRankSum=-1.196;SOR=0.227	GT:AD:DP:GQ:PL	0/1:271,40:311:99:509,0,8516	4	7.90852	7.29727	0.637321	0.177459	0.228242	3.9486
d225011	Ib	cpx	FBgn0041605	1	3R:4301140	0.244275	3R	4301140	A	G	AG	TRUE	131	1005.6	AC=1;AF=0.500;AN=2;BaseQRankSum=4.783;DP=131;ExcessHet=3.0103;FS=4.469;MLEAC=1;MLEAF=0.500;MQ=60.00;MQRankSum=0.000;QD=7.68;ReadPosRankSum=1.162;SOR=1.228	GT:AD:DP:GQ:PL	0/1:99,32:131:99:1013,0,4149	4	7.90852	7.29727	0.637321	0.177459	0.228242	3.9486
d225011	Ib	cpx	FBgn0041605	1	3R:4301142	0.290076	3R	4301142	A	G	AG	TRUE	131	1411.6	AC=1;AF=0.500;AN=2;BaseQRankSum=4.990;DP=131;ExcessHet=3.0103;FS=1.757;MLEAC=1;MLEAF=0.500;MQ=60.00;MQRankSum=0.000;QD=10.78;ReadPosRankSum=1.131;SOR=0.945	GT:AD:DP:GQ:PL	0/1:93,38:131:99:1419,0,3888	4	7.90852	7.29727	0.637321	0.177459	0.228242	3.9486
d225011	Ib	cpx	FBgn0041605	1	3R:4301150	0.275591	3R	4301150	A	G	AG	TRUE	127	1234.6	AC=1;AF=0.500;AN=2;BaseQRankSum=3.863;DP=127;ExcessHet=3.0103;FS=4.161;MLEAC=1;MLEAF=0.500;MQ=60.00;MQRankSum=0.000;QD=9.72;ReadPosRankSum=-1.092;SOR=0.370	GT:AD:DP:GQ:PL	0/1:92,35:127:99:1242,0,3752	4	7.90852	7.29727	0.637321	0.177459	0.228242	3.9486
d225011	Ib	cpx	FBgn0041605	1	3R:4301152	0.216418	3R	4301152	A	G	AG	TRUE	134	885.6	AC=1;AF=0.500;AN=2;BaseQRankSum=4.079;DP=134;ExcessHet=3.0103;FS=6.111;MLEAC=1;MLEAF=0.500;MQ=60.00;MQRankSum=0.000;QD=6.61;ReadPosRankSum=-0.043;SOR=0.274	GT:AD:DP:GQ:PL	0/1:105,29:134:99:893,0,4427	4	7.90852	7.29727	0.637321	0.177459	0.228242	3.9486
d225011	Ib	cpx	FBgn0041605	1	3R:4301154	0.212598	3R	4301154	A	G	AG	TRUE	127	894.6	AC=1;AF=0.500;AN=2;BaseQRankSum=4.680;DP=127;ExcessHet=3.0103;FS=8.334;MLEAC=1;MLEAF=0.500;MQ=60.00;MQRankSum=0.000;QD=7.04;ReadPosRankSum=0.449;SOR=0.226	GT:AD:DP:GQ:PL	0/1:100,27:127:99:902,0,4322	4	7.90852	7.29727	0.637321	0.177459	0.228242	3.9486
d225011	Ib	cpx	FBgn0041605	1	3R:4301158	0.205128	3R	4301158	A	G	AG	TRUE	117	864.6	AC=1;AF=0.500;AN=2;BaseQRankSum=6.393;DP=117;ExcessHet=3.0103;FS=9.259;MLEAC=1;MLEAF=0.500;MQ=60.00;MQRankSum=0.000;QD=7.39;ReadPosRankSum=1.477;SOR=1.923	GT:AD:DP:GQ:PL	0/1:93,24:117:99:872,0,4157	4	7.90852	7.29727	0.637321	0.177459	0.228242	3.9486
d225011	Ib	cpx	FBgn0041605	1	3R:4301244	0.390805	3R	4301244	A	G	AG	TRUE	87	1341.6	AC=1;AF=0.500;AN=2;BaseQRankSum=5.490;DP=87;ExcessHet=3.0103;FS=5.538;MLEAC=1;MLEAF=0.500;MQ=60.00;MQRankSum=0.000;QD=15.42;ReadPosRankSum=-0.283;SOR=0.771	GT:AD:DP:GQ:PL	0/1:53,34:87:99:1349,0,2013	4	7.90852	7.29727	0.637321	0.177459	0.228242	3.9486
d225011	Ib	cpx	FBgn0041605	1	3R:4301246	0.181818	3R	4301246	A	G	AG	TRUE	88	370.6	AC=1;AF=0.500;AN=2;BaseQRankSum=4.879;DP=88;ExcessHet=3.0103;FS=12.950;MLEAC=1;MLEAF=0.500;MQ=60.00;MQRankSum=0.000;QD=4.21;ReadPosRankSum=-2.660;SOR=2.003	GT:AD:DP:GQ:PL	0/1:72,16:88:99:378,0,3387	4	7.90852	7.29727	0.637321	0.177459	0.228242	3.9486
d225011	Ib	cpx	FBgn0041605	1	3R:4301258	0.163043	3R	4301258	A	G	AG	TRUE	93	339.6	AC=1;AF=0.500;AN=2;BaseQRankSum=1.364;DP=93;ExcessHet=3.0103;FS=6.187;MLEAC=1;MLEAF=0.500;MQ=60.00;MQRankSum=0.000;QD=3.69;ReadPosRankSum=0.185;SOR=1.687	GT:AD:DP:GQ:PL	0/1:77,15:92:99:347,0,3079	4	7.90852	7.29727	0.637321	0.177459	0.228242	3.9486
d225011	Ib	Vha26	FBgn0283535	1	3R:5594099	0.139535	3R	5594099	A	G	AG	TRUE	86	168.6	AC=1;AF=0.500;AN=2;BaseQRankSum=2.185;DP=86;ExcessHet=3.0103;FS=0.000;MLEAC=1;MLEAF=0.500;MQ=60.00;MQRankSum=0.000;QD=1.96;ReadPosRankSum=-0.069;SOR=0.642	GT:AD:DP:GQ:PL	0/1:74,12:86:99:176,0,2063	4	7.31501	7.15393	0.778039	4.68759	4.94428	3.9486
d225011	Ib	para	FBgn0285944	-1	X:16464719	1	X	16464719	T	C	AG	TRUE	46	1639.03	AC=2;AF=1.00;AN=2;DP=46;ExcessHet=3.0103;FS=0.000;MLEAC=2;MLEAF=1.00;MQ=60.00;QD=29.76;SOR=1.085	GT:AD:DP:GQ:PL	1/1:0,46:46:99:1653,138,0	4	4.84243	5.41949	0.0668684	0.0459099	0.108431	3.9486
d225011	Ib	Frq1	FBgn0030897	1	X:18170126	0.231023	X	18170126	A	G	AG	TRUE	304	1448.6	AC=1;AF=0.500;AN=2;BaseQRankSum=4.264;DP=304;ExcessHet=3.0103;FS=11.828;MLEAC=1;MLEAF=0.500;MQ=60.00;MQRankSum=0.000;QD=4.78;ReadPosRankSum=0.064;SOR=1.561	GT:AD:DP:GQ:PL	0/1:233,70:303:99:1456,0,7183	4	6.87486	6.93852	0.801616	0.138615	0.135627	3.9486
d225011	Ib	DIP1	FBgn0024807	-1	X:21629725	0.707317	X	21629725	T	C	AG	TRUE	41	1173.6	AC=1;AF=0.500;AN=2;BaseQRankSum=2.764;DP=41;ExcessHet=3.0103;FS=1.343;MLEAC=1;MLEAF=0.500;MQ=60.00;MQRankSum=0.000;QD=28.62;ReadPosRankSum=-0.560;SOR=1.071	GT:AD:DP:GQ:PL	0/1:12,29:41:99:1181,0,403	4	4.22571	4.66995	0.917906	1.90808	1.68313	3.9486
d225011	Ib	DIP1	FBgn0024807	-1	X:21629726	0.119048	X	21629726	T	C	AG	TRUE	42	85.6	AC=1;AF=0.500;AN=2;BaseQRankSum=3.316;DP=42;ExcessHet=3.0103;FS=4.304;MLEAC=1;MLEAF=0.500;MQ=60.00;MQRankSum=0.000;QD=2.04;ReadPosRankSum=0.039;SOR=1.721	GT:AD:DP:GQ:PL	0/1:37,5:42:93:93,0,1598	4	4.22571	4.66995	0.917906	1.90808	1.68313	3.9486
d225011	Ib	DIP1	FBgn0024807	-1	X:21629727	0.636364	X	21629727	T	C	AG	TRUE	44	973.6	AC=1;AF=0.500;AN=2;BaseQRankSum=0.186;DP=44;ExcessHet=3.0103;FS=15.228;MLEAC=1;MLEAF=0.500;MQ=60.00;MQRankSum=0.000;QD=22.13;ReadPosRankSum=0.623;SOR=0.328	GT:AD:DP:GQ:PL	0/1:16,28:44:99:981,0,508	4	4.22571	4.66995	0.917906	1.90808	1.68313	3.9486
d225011	Ib	DIP1	FBgn0024807	-1	X:21629737	0.390244	X	21629737	T	C	AG	TRUE	41	552.6	AC=1;AF=0.500;AN=2;BaseQRankSum=0.178;DP=41;ExcessHet=3.0103;FS=0.000;MLEAC=1;MLEAF=0.500;MQ=60.00;MQRankSum=0.000;QD=13.48;ReadPosRankSum=-0.067;SOR=0.553	GT:AD:DP:GQ:PL	0/1:25,16:41:99:560,0,935	4	4.22571	4.66995	0.917906	1.90808	1.68313	3.9486
d225011	Ib	sdt	FBgn0261873	1	X:8240090	1	X	8240090	A	G	AG	TRUE	39	1198.03	AC=2;AF=1.00;AN=2;DP=39;ExcessHet=3.0103;FS=0.000;MLEAC=2;MLEAF=1.00;MQ=60.00;QD=31.53;SOR=0.693	GT:AD:DP:GQ:PL	1/1:0,38:38:99:1212,112,0	4	3.2011	3.62824	0.393265	0.562036	0.832706	3.9486
d225022	Ib	CG33303	FBgn0053303	-1	2L:10374859	0.385714	2L	10374859	T	C	AG	TRUE	70	799.6	AC=1;AF=0.500;AN=2;BaseQRankSum=4.273;DP=70;ExcessHet=3.0103;FS=0.000;MLEAC=1;MLEAF=0.500;MQ=60.00;MQRankSum=0.000;QD=11.42;ReadPosRankSum=1.421;SOR=0.638	GT:AD:DP:GQ:PL	0/1:43,27:70:99:807,0,1158	4	4.82255	3.93282	0.505552	2.43097	2.84372	0
d225022	Ib	Pex19	FBgn0032407	1	2L:12094295	0.123288	2L	12094295	A	G	AG	TRUE	73	177.6	AC=1;AF=0.500;AN=2;BaseQRankSum=4.085;DP=73;ExcessHet=3.0103;FS=7.753;MLEAC=1;MLEAF=0.500;MQ=60.00;MQRankSum=0.000;QD=2.43;ReadPosRankSum=-0.277;SOR=1.265	GT:AD:DP:GQ:PL	0/1:64,9:73:99:185,0,2590	4	5.52679	4.58011	0.198542	3.35329	3.35545	0
d225022	Ib	ThrRS	FBgn0027081	1	2L:12106021	0.727273	2L	12106021	A	G	AG	TRUE	22	520.6	AC=1;AF=0.500;AN=2;BaseQRankSum=3.301;DP=22;ExcessHet=3.0103;FS=0.000;MLEAC=1;MLEAF=0.500;MQ=60.00;MQRankSum=0.000;QD=23.66;ReadPosRankSum=0.037;SOR=1.234	GT:AD:DP:GQ:PL	0/1:6,16:22:99:528,0,144	4	5.11791	5.14664	0.914631	2.22626	2.05694	0
d225022	Ib	CG16974	FBgn0032479	-1	2L:13189312	1	2L	13189312	T	C	AG	TRUE	81	2777.03	AC=2;AF=1.00;AN=2;DP=81;ExcessHet=3.0103;FS=0.000;MLEAC=2;MLEAF=1.00;MQ=60.00;QD=34.28;SOR=1.854	GT:AD:DP:GQ:PL	1/1:0,81:81:99:2791,242,0	4	3.8107	3.63081	0.755289	1.61977	1.51626	0
d225022	Ib	chinmo	FBgn0086758	1	2L:1697095	1	2L	1697095	A	G	AG	TRUE	38	1368.03	AC=2;AF=1.00;AN=2;DP=38;ExcessHet=3.0103;FS=0.000;MLEAC=2;MLEAF=1.00;MQ=60.00;QD=29.99;SOR=1.493	GT:AD:DP:GQ:PL	1/1:0,38:38:99:1382,114,0	4	4.89124	3.28942	2.254e-05	2.01378	1.91915	0
d225022	Ib	toc	FBgn0015600	-1	2L:3127431	1	2L	3127431	T	C	AG	TRUE	12	418.02	AC=2;AF=1.00;AN=2;DP=12;ExcessHet=3.0103;FS=0.000;MLEAC=2;MLEAF=1.00;MQ=60.00;QD=34.84;SOR=0.693	GT:AD:DP:GQ:PL	1/1:0,12:12:36:432,36,0	4	2.90338	3.0015	0.854332	0.60002	0.848108	0
d225022	Ib	ND-B14.5B	FBgn0031505	-1	2L:3145125	1	2L	3145125	T	C	AG	TRUE	19	646.03	AC=2;AF=1.00;AN=2;DP=19;ExcessHet=3.0103;FS=0.000;MLEAC=2;MLEAF=1.00;MQ=60.00;QD=34.00;SOR=3.611	GT:AD:DP:GQ:PL	1/1:0,19:19:57:660,57,0	4	7.10814	6.50114	0.981134	7.02897	7.05689	0
d225022	Ib	CG9662	FBgn0031529	-1	2L:3375848	1	2L	3375848	T	C	AG	TRUE	16	584.03	AC=2;AF=1.00;AN=2;DP=16;ExcessHet=3.0103;FS=0.000;MLEAC=2;MLEAF=1.00;MQ=60.00;QD=29.87;SOR=5.670	GT:AD:DP:GQ:PL	1/1:0,16:16:48:598,48,0	4	4.79971	4.26303	0.58721	2.25071	2.37554	0
d225022	Ib	Thor	FBgn0261560	1	2L:3478627	0.767857	2L	3478627	A	G	AG	TRUE	168	4145.6	AC=1;AF=0.500;AN=2;BaseQRankSum=7.021;DP=168;ExcessHet=3.0103;FS=9.866;MLEAC=1;MLEAF=0.500;MQ=60.00;MQRankSum=0.000;QD=24.68;ReadPosRankSum=-0.805;SOR=0.357	GT:AD:DP:GQ:PL	0/1:39,129:168:99:4153,0,624	4	4.02038	3.58018	0.652908	11.318	10.933	0
d225022	Ib	Nckx30C	FBgn0028704	-1	2L:9717614	1	2L	9717614	T	C	AG	TRUE	11	385.02	AC=2;AF=1.00;AN=2;DP=11;ExcessHet=3.0103;FS=0.000;MLEAC=2;MLEAF=1.00;MQ=60.00;QD=33.28;SOR=1.270	GT:AD:DP:GQ:PL	1/1:0,11:11:33:399,33,0	4	4.99389	4.09503	0.0412382	0.0832012	0.108464	0
d225022	Ib	RpS15Ab	FBgn0033555	1	2R:10822309	0.342105	2R	10822309	A	G	AG	TRUE	38	337.6	AC=1;AF=0.500;AN=2;BaseQRankSum=1.757;DP=38;ExcessHet=3.0103;FS=21.096;MLEAC=1;MLEAF=0.500;MQ=60.00;MQRankSum=0.000;QD=8.88;ReadPosRankSum=-0.894;SOR=4.539	GT:AD:DP:GQ:PL	0/1:25,13:38:99:345,0,659	4	3.76529	3.1313	0.134754	5.69163	5.75158	0
d225022	Ib	nclb	FBgn0263510	1	2R:10876649	0.58	2R	10876649	A	G	AG	TRUE	50	881.6	AC=1;AF=0.500;AN=2;BaseQRankSum=4.920;DP=50;ExcessHet=3.0103;FS=7.804;MLEAC=1;MLEAF=0.500;MQ=60.00;MQRankSum=0.000;QD=17.63;ReadPosRankSum=0.908;SOR=2.162	GT:AD:DP:GQ:PL	0/1:21,29:50:99:889,0,535	4	2.63709	1.58521	0.250542	0.492658	0.759112	0
d225022	Ib	CG3955	FBgn0033793	-1	2R:13128147	0.512195	2R	13128147	T	C	AG	TRUE	82	1243.6	AC=1;AF=0.500;AN=2;BaseQRankSum=4.193;DP=82;ExcessHet=3.0103;FS=1.879;MLEAC=1;MLEAF=0.500;MQ=60.00;MQRankSum=0.000;QD=15.17;ReadPosRankSum=2.591;SOR=0.489	GT:AD:DP:GQ:PL	0/1:40,42:82:99:1251,0,1031	4	4.54626	4.75042	0.982538	0.118374	0.14535	0
d225022	Ib	CG6329	FBgn0033872	1	2R:13832057	0.792793	2R	13832057	A	G	AG	TRUE	111	3581.6	AC=1;AF=0.500;AN=2;BaseQRankSum=3.206;DP=111;ExcessHet=3.0103;FS=0.000;MLEAC=1;MLEAF=0.500;MQ=60.00;MQRankSum=0.000;QD=32.27;ReadPosRankSum=-2.248;SOR=0.606	GT:AD:DP:GQ:PL	0/1:23,88:111:99:3589,0,960	4	6.30782	5.19838	0.0246684	0.326178	0.229277	0
d225022	Ib	CG6329	FBgn0033872	1	2R:13832539	0.64557	2R	13832539	A	G	AG	TRUE	79	1632.6	AC=1;AF=0.500;AN=2;BaseQRankSum=5.859;DP=79;ExcessHet=3.0103;FS=7.873;MLEAC=1;MLEAF=0.500;MQ=60.00;MQRankSum=0.000;QD=20.67;ReadPosRankSum=0.067;SOR=0.239	GT:AD:DP:GQ:PL	0/1:28,51:79:99:1640,0,692	4	6.30782	5.19838	0.0246684	0.326178	0.229277	0
d225022	Ib	ReepB	FBgn0033906	1	2R:14172781	0.64455	2R	14172781	A	G	AG	TRUE	211	4023.6	AC=1;AF=0.500;AN=2;BaseQRankSum=5.888;DP=211;ExcessHet=3.0103;FS=0.715;MLEAC=1;MLEAF=0.500;MQ=60.00;MQRankSum=0.000;QD=19.07;ReadPosRankSum=-2.093;SOR=0.804	GT:AD:DP:GQ:PL	0/1:75,136:211:99:4031,0,1728	4	8.82339	8.47452	0.973655	7.40431	7.35215	0
d225022	Ib	ReepB	FBgn0033906	1	2R:14172820	0.641509	2R	14172820	A	G	AG	TRUE	159	3135.6	AC=1;AF=0.500;AN=2;BaseQRankSum=6.756;DP=159;ExcessHet=3.0103;FS=0.000;MLEAC=1;MLEAF=0.500;MQ=60.00;MQRankSum=0.000;QD=19.72;ReadPosRankSum=0.209;SOR=0.788	GT:AD:DP:GQ:PL	0/1:57,102:159:99:3143,0,1194	4	8.82339	8.47452	0.973655	7.40431	7.35215	0
d225022	Ib	mRpS16	FBgn0033907	-1	2R:14173081	0.730496	2R	14173081	T	C	AG	TRUE	141	4331.6	AC=1;AF=0.500;AN=2;BaseQRankSum=3.402;DP=141;ExcessHet=3.0103;FS=2.004;MLEAC=1;MLEAF=0.500;MQ=60.00;MQRankSum=0.000;QD=30.72;ReadPosRankSum=1.043;SOR=1.003	GT:AD:DP:GQ:PL	0/1:38,103:141:99:4339,0,1220	4	2.9769	2.95758	0.828541	2.15934	1.92185	0
d225022	Ib	bug	FBgn0034050	1	2R:15935345	1	2R	15935345	A	G	AG	TRUE	54	1902.03	AC=2;AF=1.00;AN=2;DP=54;ExcessHet=3.0103;FS=0.000;MLEAC=2;MLEAF=1.00;MQ=60.00;QD=32.85;SOR=0.931	GT:AD:DP:GQ:PL	1/1:0,54:54:99:1916,162,0	4	1.45112	2.51366	0.00831639	1.71608	1.56393	0
d225022	Ib	Ufc1	FBgn0034061	-1	2R:16007210	1	2R	16007210	T	C	AG	TRUE	47	2097.03	AC=2;AF=1.00;AN=2;DP=47;ExcessHet=3.0103;FS=0.000;MLEAC=2;MLEAF=1.00;MQ=60.00;QD=25.22;SOR=2.352	GT:AD:DP:GQ:PL	1/1:0,47:47:99:2111,147,0	4	3.89671	4.76406	0.198863	4.33244	4.42744	0
d225022	Ib	EMC7	FBgn0034066	-1	2R:16016880	0.5375	2R	16016880	T	C	AG	TRUE	80	1691.6	AC=1;AF=0.500;AN=2;BaseQRankSum=4.477;DP=80;ExcessHet=3.0103;FS=13.328;MLEAC=1;MLEAF=0.500;MQ=60.00;MQRankSum=0.000;QD=21.15;ReadPosRankSum=1.418;SOR=0.782	GT:AD:DP:GQ:PL	0/1:37,43:80:99:1699,0,1745	4	5.21612	4.84046	0.677238	4.60568	4.16897	0
d225022	Ib	EMC7	FBgn0034066	-1	2R:16016882	0.533333	2R	16016882	T	C	AG	TRUE	75	1691.6	AC=1;AF=0.500;AN=2;BaseQRankSum=5.812;DP=75;ExcessHet=3.0103;FS=12.098;MLEAC=1;MLEAF=0.500;MQ=60.00;MQRankSum=0.000;QD=22.55;ReadPosRankSum=2.058;SOR=0.528	GT:AD:DP:GQ:PL	0/1:35,40:75:99:1699,0,1745	4	5.21612	4.84046	0.677238	4.60568	4.16897	0
d225022	Ib	CG8405	FBgn0034071	1	2R:16048343	1	2R	16048343	A	G	AG	TRUE	56	2629.03	AC=2;AF=1.00;AN=2;DP=56;ExcessHet=3.0103;FS=0.000;MLEAC=2;MLEAF=1.00;MQ=60.00;QD=24.67;SOR=0.841	GT:AD:DP:GQ:PL	1/1:0,56:56:99:2643,181,0	4	2.53302	2.65448	0.692047	1.04381	0.98824	0
d225022	Ib	pAbp	FBgn0265297	1	2R:18146333	0.638462	2R	18146333	A	G	AG	TRUE	130	2512.6	AC=1;AF=0.500;AN=2;BaseQRankSum=5.836;DP=130;ExcessHet=3.0103;FS=3.770;MLEAC=1;MLEAF=0.500;MQ=60.00;MQRankSum=0.000;QD=19.33;ReadPosRankSum=-3.587;SOR=0.396	GT:AD:DP:GQ:PL	0/1:47,83:130:99:2520,0,1099	4	8.63626	8.36071	0.0632563	6.39335	6.25444	0
d225022	Ib	CG14591	FBgn0033054	-1	2R:6037128	0.352941	2R	6037128	T	C	AG	TRUE	34	314.6	AC=1;AF=0.500;AN=2;BaseQRankSum=1.947;DP=34;ExcessHet=3.0103;FS=1.384;MLEAC=1;MLEAF=0.500;MQ=60.00;MQRankSum=0.000;QD=9.25;ReadPosRankSum=-0.642;SOR=0.976	GT:AD:DP:GQ:PL	0/1:22,12:34:99:322,0,642	4	4.47495	4.49171	0.904654	0.132465	0.0680559	0
d225022	Ib	Vha16-1	FBgn0262736	-1	2R:6626169	0.138889	2R	6626169	T	C	AG	TRUE	72	152.6	AC=1;AF=0.500;AN=2;BaseQRankSum=2.703;DP=72;ExcessHet=3.0103;FS=4.864;MLEAC=1;MLEAF=0.500;MQ=60.00;MQRankSum=0.000;QD=2.12;ReadPosRankSum=-0.775;SOR=1.511	GT:AD:DP:GQ:PL	0/1:62,10:72:99:160,0,2528	4	8.42356	8.78145	0.297901	6.11325	6.08202	0
d225022	Ib	Vha16-1	FBgn0262736	-1	2R:6626171	0.151515	2R	6626171	T	C	AG	TRUE	66	152.6	AC=1;AF=0.500;AN=2;BaseQRankSum=3.940;DP=66;ExcessHet=3.0103;FS=2.939;MLEAC=1;MLEAF=0.500;MQ=60.00;MQRankSum=0.000;QD=2.31;ReadPosRankSum=-1.479;SOR=1.193	GT:AD:DP:GQ:PL	0/1:56,10:66:99:160,0,2528	4	8.42356	8.78145	0.297901	6.11325	6.08202	0
d225022	Ib	CG14764	FBgn0033236	-1	2R:7954006	1	2R	7954006	T	C	AG	TRUE	11	377.02	AC=2;AF=1.00;AN=2;DP=11;ExcessHet=3.0103;FS=0.000;MLEAC=2;MLEAF=1.00;MQ=60.00;QD=34.27;SOR=0.859	GT:AD:DP:GQ:PL	1/1:0,11:11:33:391,33,0	4	3.63595	4.28822	0.22193	0.652756	0.775469	0
d225022	Ib	Uba1	FBgn0023143	-1	2R:9688858	1	2R	9688858	T	C	AG	TRUE	14	455.03	AC=2;AF=1.00;AN=2;DP=14;ExcessHet=3.0103;FS=0.000;MLEAC=2;MLEAF=1.00;MQ=60.00;QD=32.50;SOR=1.329	GT:AD:DP:GQ:PL	1/1:0,14:14:42:469,42,0	4	4.58023	4.88416	0.433921	3.14724	3.06775	0
d225022	Ib	Pka-R2	FBgn0022382	-1	2R:9994533	0.816	2R	9994533	T	C	AG	TRUE	125	3093.6	AC=1;AF=0.500;AN=2;BaseQRankSum=4.216;DP=125;ExcessHet=3.0103;FS=0.000;MLEAC=1;MLEAF=0.500;MQ=60.00;MQRankSum=0.000;QD=24.75;ReadPosRankSum=-1.154;SOR=0.641	GT:AD:DP:GQ:PL	0/1:23,102:125:99:3101,0,402	4	4.61114	4.8641	0.950267	2.30218	2.12679	0
d225022	Ib	Gbs-76A	FBgn0036862	-1	3L:19283264	1	3L	19283264	T	C	AG	TRUE	24	725.03	AC=2;AF=1.00;AN=2;DP=24;ExcessHet=3.0103;FS=0.000;MLEAC=2;MLEAF=1.00;MQ=60.00;QD=30.21;SOR=1.051	GT:AD:DP:GQ:PL	1/1:0,24:24:71:739,71,0	4	2.62452	1.40716	0.00204643	3.06808	2.85648	0
d225022	Ib	Csp	FBgn0004179	1	3L:22273143	0.220339	3L	22273143	A	G	AG	TRUE	59	316.6	AC=1;AF=0.500;AN=2;BaseQRankSum=5.680;DP=59;ExcessHet=3.0103;FS=7.229;MLEAC=1;MLEAF=0.500;MQ=60.00;MQRankSum=0.000;QD=5.37;ReadPosRankSum=-2.384;SOR=1.911	GT:AD:DP:GQ:PL	0/1:46,13:59:99:324,0,1500	4	5.56152	5.5577	0.972817	1.72477	1.54634	0
d225022	Ib	nAChRbeta1	FBgn0000038	1	3L:4429963	1	3L	4429963	A	G	AG	TRUE	13	488.02	AC=2;AF=1.00;AN=2;DP=13;ExcessHet=3.0103;FS=0.000;MLEAC=2;MLEAF=1.00;MQ=60.00;QD=27.05;SOR=1.609	GT:AD:DP:GQ:PL	1/1:0,13:13:39:502,39,0	4	6.35534	5.5438	0.188032	0.118617	0.0901246	0
d225022	Ib	Rdl	FBgn0004244	-1	3L:9155218	1	3L	9155218	T	C	AG	TRUE	41	1470.03	AC=2;AF=1.00;AN=2;DP=41;ExcessHet=3.0103;FS=0.000;MLEAC=2;MLEAF=1.00;MQ=60.00;QD=25.44;SOR=1.501	GT:AD:DP:GQ:PL	1/1:0,41:41:99:1484,123,0	4	6.00229	5.65752	0.165943	0.174173	0.0730245	0
d225022	Ib	Xrp1	FBgn0261113	1	3R:18918354	1	3R	18918354	A	G	AG	TRUE	27	964.03	AC=2;AF=1.00;AN=2;DP=27;ExcessHet=3.0103;FS=0.000;MLEAC=2;MLEAF=1.00;MQ=60.00;QD=30.48;SOR=2.066	GT:AD:DP:GQ:PL	1/1:0,27:27:81:978,81,0	4	6.93525	6.63308	0.99582	5.49922	5.49918	0
d225022	Ib	Rlip	FBgn0026056	1	3R:21020562	1	3R	21020562	A	G	AG	TRUE	48	1700.03	AC=2;AF=1.00;AN=2;DP=48;ExcessHet=3.0103;FS=0.000;MLEAC=2;MLEAF=1.00;MQ=60.00;QD=35.38;SOR=2.208	GT:AD:DP:GQ:PL	1/1:0,48:48:99:1714,144,0	4	1.73807	2.13756	0.804143	0.464341	0.479873	0
d225022	Ib	ATPsynCF6	FBgn0016119	-1	3R:23355357	0.323276	3R	23355357	T	C	AG	TRUE	232	1694.6	AC=1;AF=0.500;AN=2;BaseQRankSum=1.849;DP=232;ExcessHet=3.0103;FS=10.948;MLEAC=1;MLEAF=0.500;MQ=60.00;MQRankSum=0.000;QD=7.30;ReadPosRankSum=1.716;SOR=0.274	GT:AD:DP:GQ:PL	0/1:157,75:232:99:1702,0,4209	4	9.01907	8.99728	0.563116	8.34196	8.52202	0
d225022	Ib	Rpt5	FBgn0028684	1	3R:23754573	0.387097	3R	23754573	A	G	AG	TRUE	62	963.6	AC=1;AF=0.500;AN=2;BaseQRankSum=5.062;DP=62;ExcessHet=3.0103;FS=11.345;MLEAC=1;MLEAF=0.500;MQ=60.00;MQRankSum=0.000;QD=15.54;ReadPosRankSum=-3.042;SOR=3.371	GT:AD:DP:GQ:PL	0/1:38,24:62:99:971,0,1601	4	5.93216	6.10852	0.925004	5.71526	5.18509	0
d225022	Ib	Gdh	FBgn0001098	-1	3R:23936205	0.445161	3R	23936205	T	C	AG	TRUE	155	1995.6	AC=1;AF=0.500;AN=2;BaseQRankSum=7.619;DP=155;ExcessHet=3.0103;FS=0.657;MLEAC=1;MLEAF=0.500;MQ=60.00;MQRankSum=0.000;QD=12.87;ReadPosRankSum=0.007;SOR=0.762	GT:AD:DP:GQ:PL	0/1:86,69:155:99:2003,0,2331	4	6.73636	5.26871	0.00814535	4.37474	4.57326	0
d225022	Ib	Ald1	FBgn0000064	-1	3R:26254245	0.670157	3R	26254245	T	C	AG	TRUE	390	7729.64	AC=1;AF=0.500;AN=2;BaseQRankSum=7.515;DP=390;ExcessHet=3.0103;FS=0.930;MLEAC=1;MLEAF=0.500;MQ=60.00;MQRankSum=0.000;QD=20.23;ReadPosRankSum=-0.533;SOR=0.766	GT:AD:DP:GQ:PL	0/1:126,256:382:99:7737,0,2396	4	11.4026	10.0568	0.0414265	10.8637	11.1339	0
d225022	Ib	Ald1	FBgn0000064	-1	3R:26254381	0.683333	3R	26254381	T	C	AG	TRUE	421	9291.6	AC=1;AF=0.500;AN=2;BaseQRankSum=10.044;DP=421;ExcessHet=3.0103;FS=0.000;MLEAC=1;MLEAF=0.500;MQ=60.00;MQRankSum=0.000;QD=22.12;ReadPosRankSum=-1.364;SOR=0.693	GT:AD:DP:GQ:PL	0/1:133,287:420:99:9299,0,3138	4	11.4026	10.0568	0.0414265	10.8637	11.1339	0
d225022	Ib	TfIIA-L	FBgn0011289	1	3R:27255644	1	3R	27255644	A	G	AG	TRUE	41	1770.03	AC=2;AF=1.00;AN=2;DP=41;ExcessHet=3.0103;FS=0.000;MLEAC=2;MLEAF=1.00;MQ=60.00;QD=29.90;SOR=1.206	GT:AD:DP:GQ:PL	1/1:0,41:41:99:1784,124,0	4	2.98054	3.12474	0.877624	2.55085	2.08212	0
d225022	Ib	bigmax	FBgn0039509	-1	3R:27287902	1	3R	27287902	T	C	AG	TRUE	54	1950.03	AC=2;AF=1.00;AN=2;DP=54;ExcessHet=3.0103;FS=0.000;MLEAC=2;MLEAF=1.00;MQ=60.00;QD=33.78;SOR=1.220	GT:AD:DP:GQ:PL	1/1:0,54:54:99:1964,162,0	4	1.89459	1.57961	0.779446	3.68165	3.47567	0
d225022	Ib	Hmu	FBgn0015737	1	3R:27290230	1	3R	27290230	A	G	AG	TRUE	50	1823.03	AC=2;AF=1.00;AN=2;DP=50;ExcessHet=3.0103;FS=0.000;MLEAC=2;MLEAF=1.00;MQ=60.00;QD=30.06;SOR=0.773	GT:AD:DP:GQ:PL	1/1:0,50:50:99:1837,150,0	4	5.87173	5.77395	0.390105	2.59234	2.73469	0
d225022	Ib	Pkc98E	FBgn0003093	1	3R:29046298	0.306122	3R	29046298	A	G	AG	TRUE	49	546.6	AC=1;AF=0.500;AN=2;BaseQRankSum=4.381;DP=49;ExcessHet=3.0103;FS=9.824;MLEAC=1;MLEAF=0.500;MQ=60.00;MQRankSum=0.000;QD=11.16;ReadPosRankSum=0.402;SOR=0.346	GT:AD:DP:GQ:PL	0/1:34,15:49:99:554,0,2015	4	4.42269	4.69937	0.833844	1.73884	1.5978	0
d225022	Ib	kay	FBgn0001297	1	3R:29794088	1	3R	29794088	A	G	AG	TRUE	19	655.03	AC=2;AF=1.00;AN=2;DP=19;ExcessHet=3.0103;FS=0.000;MLEAC=2;MLEAF=1.00;MQ=60.00;QD=34.48;SOR=4.514	GT:AD:DP:GQ:PL	1/1:0,19:19:57:669,57,0	4	5.08707	5.90756	0.125239	4.66592	4.33526	0
d225022	Ib	Drice	FBgn0019972	1	3R:29800350	0.46875	3R	29800350	A	G	AG	TRUE	64	834.6	AC=1;AF=0.500;AN=2;BaseQRankSum=3.162;DP=64;ExcessHet=3.0103;FS=6.789;MLEAC=1;MLEAF=0.500;MQ=60.00;MQRankSum=0.000;QD=13.04;ReadPosRankSum=2.751;SOR=0.722	GT:AD:DP:GQ:PL	0/1:34,30:64:99:842,0,875	4	3.00994	3.58233	0.417715	2.92448	2.78377	0
d225022	Ib	Etfb	FBgn0039697	-1	3R:29801970	0.555556	3R	29801970	T	C	AG	TRUE	81	1418.6	AC=1;AF=0.500;AN=2;BaseQRankSum=5.441;DP=81;ExcessHet=3.0103;FS=14.542;MLEAC=1;MLEAF=0.500;MQ=60.00;MQRankSum=0.000;QD=17.51;ReadPosRankSum=2.543;SOR=0.117	GT:AD:DP:GQ:PL	0/1:36,45:81:99:1426,0,965	4	3.23977	2.84256	0.833576	4.60934	4.72143	0
d225022	Ib	RpS8	FBgn0039713	1	3R:29863650	0.26	3R	29863650	A	G	AG	TRUE	200	1216.6	AC=1;AF=0.500;AN=2;BaseQRankSum=1.531;DP=200;ExcessHet=3.0103;FS=1.154;MLEAC=1;MLEAF=0.500;MQ=60.00;MQRankSum=0.000;QD=6.08;ReadPosRankSum=1.733;SOR=0.977	GT:AD:DP:GQ:PL	0/1:148,52:200:99:1224,0,5322	4	12.4079	12.3182	0.473228	11.7965	11.7074	0
d225022	Ib	CG1983	FBgn0039751	-1	3R:30176517	1	3R	30176517	T	C	AG	TRUE	34	1516.03	AC=2;AF=1.00;AN=2;DP=34;ExcessHet=3.0103;FS=0.000;MLEAC=2;MLEAF=1.00;MQ=60.00;QD=34.26;SOR=0.693	GT:AD:DP:GQ:PL	1/1:0,34:34:99:1530,102,0	4	2.38572	2.69018	0.980606	1.77594	1.87856	0
d225022	Ib	CG1983	FBgn0039751	-1	3R:30176862	1	3R	30176862	T	C	AG	TRUE	75	2573.03	AC=2;AF=1.00;AN=2;DP=75;ExcessHet=3.0103;FS=0.000;MLEAC=2;MLEAF=1.00;MQ=60.00;QD=34.31;SOR=1.240	GT:AD:DP:GQ:PL	1/1:0,75:75:99:2587,224,0	4	2.38572	2.69018	0.980606	1.77594	1.87856	0
d225022	Ib	cindr	FBgn0027598	1	3R:30826946	0.810811	3R	30826946	A	G	AG	TRUE	37	924.6	AC=1;AF=0.500;AN=2;BaseQRankSum=2.914;DP=37;ExcessHet=3.0103;FS=0.000;MLEAC=1;MLEAF=0.500;MQ=60.00;MQRankSum=0.000;QD=24.99;ReadPosRankSum=-0.662;SOR=0.569	GT:AD:DP:GQ:PL	0/1:7,30:37:99:932,0,106	4	3.79459	4.09584	0.742166	2.21586	2.35913	0
d225022	Ib	CycG	FBgn0039858	-1	3R:31601551	0.222222	3R	31601551	T	C	AG	TRUE	36	178.6	AC=1;AF=0.500;AN=2;BaseQRankSum=2.960;DP=36;ExcessHet=3.0103;FS=9.854;MLEAC=1;MLEAF=0.500;MQ=60.00;MQRankSum=0.000;QD=4.96;ReadPosRankSum=-0.288;SOR=1.754	GT:AD:DP:GQ:PL	0/1:28,8:36:99:186,0,793	4	6.749	7.09638	0.463947	5.43584	5.80647	0
d225022	Ib	CycG	FBgn0039858	-1	3R:31601718	0.421053	3R	31601718	T	C	AG	TRUE	57	651.6	AC=1;AF=0.500;AN=2;BaseQRankSum=4.181;DP=57;ExcessHet=3.0103;FS=1.043;MLEAC=1;MLEAF=0.500;MQ=60.00;MQRankSum=0.000;QD=11.43;ReadPosRankSum=0.277;SOR=0.473	GT:AD:DP:GQ:PL	0/1:33,24:57:99:659,0,797	4	6.749	7.09638	0.463947	5.43584	5.80647	0
d225022	Ib	cpx	FBgn0041605	1	3R:4297504	0.606838	3R	4297504	A	G	AG	TRUE	117	1948.6	AC=1;AF=0.500;AN=2;BaseQRankSum=3.551;DP=117;ExcessHet=3.0103;FS=4.942;MLEAC=1;MLEAF=0.500;MQ=60.00;MQRankSum=0.000;QD=16.65;ReadPosRankSum=0.910;SOR=1.337	GT:AD:DP:GQ:PL	0/1:46,71:117:99:1956,0,1234	4	7.90852	7.29727	0.637321	0.177459	0.228242	0
d225022	Ib	cpx	FBgn0041605	1	3R:4297517	0.24	3R	4297517	A	G	AG	TRUE	201	1060.6	AC=1;AF=0.500;AN=2;BaseQRankSum=6.095;DP=201;ExcessHet=3.0103;FS=4.889;MLEAC=1;MLEAF=0.500;MQ=60.00;MQRankSum=0.000;QD=5.30;ReadPosRankSum=0.457;SOR=1.172	GT:AD:DP:GQ:PL	0/1:152,48:200:99:1068,0,4604	4	7.90852	7.29727	0.637321	0.177459	0.228242	0
d225022	Ib	cpx	FBgn0041605	1	3R:4297518	0.292079	3R	4297518	A	G	AG	TRUE	202	1455.6	AC=1;AF=0.500;AN=2;BaseQRankSum=7.710;DP=202;ExcessHet=3.0103;FS=5.685;MLEAC=1;MLEAF=0.500;MQ=60.00;MQRankSum=0.000;QD=7.21;ReadPosRankSum=0.139;SOR=1.180	GT:AD:DP:GQ:PL	0/1:143,59:202:99:1463,0,4239	4	7.90852	7.29727	0.637321	0.177459	0.228242	0
d225022	Ib	cpx	FBgn0041605	1	3R:4301150	0.30094	3R	4301150	A	G	AG	TRUE	319	2255.6	AC=1;AF=0.500;AN=2;BaseQRankSum=6.167;DP=319;ExcessHet=3.0103;FS=5.640;MLEAC=1;MLEAF=0.500;MQ=60.00;MQRankSum=0.000;QD=7.07;ReadPosRankSum=-0.406;SOR=0.430	GT:AD:DP:GQ:PL	0/1:223,96:319:99:2263,0,8336	4	7.90852	7.29727	0.637321	0.177459	0.228242	0
d225022	Ib	para	FBgn0285944	-1	X:16464719	1	X	16464719	T	C	AG	TRUE	16	533.03	AC=2;AF=1.00;AN=2;DP=16;ExcessHet=3.0103;FS=0.000;MLEAC=2;MLEAF=1.00;MQ=60.00;QD=33.31;SOR=1.244	GT:AD:DP:GQ:PL	1/1:0,16:16:48:547,48,0	4	4.84243	5.41949	0.0668684	0.0459099	0.108431	0
d225022	Ib	para	FBgn0285944	-1	X:16482682	1	X	16482682	T	C	AG	TRUE	28	982.03	AC=2;AF=1.00;AN=2;DP=28;ExcessHet=3.0103;FS=0.000;MLEAC=2;MLEAF=1.00;MQ=60.00;QD=32.40;SOR=3.767	GT:AD:DP:GQ:PL	1/1:0,28:28:84:996,84,0	4	4.84243	5.41949	0.0668684	0.0459099	0.108431	0
d225022	Ib	Sh	FBgn0003380	-1	X:17950057	1	X	17950057	T	C	AG	TRUE	28	1210.03	AC=2;AF=1.00;AN=2;DP=28;ExcessHet=3.0103;FS=0.000;MLEAC=2;MLEAF=1.00;MQ=60.00;QD=32.75;SOR=1.179	GT:AD:DP:GQ:PL	1/1:0,28:28:87:1224,87,0	4	5.78478	5.98037	0.885151	2.25586	1.88036	0
d225023	Ib	Pex19	FBgn0032407	1	2L:12094295	0.514706	2L	12094295	A	G	AG	TRUE	68	1323.6	AC=1;AF=0.500;AN=2;BaseQRankSum=2.320;DP=68;ExcessHet=3.0103;FS=0.000;MLEAC=1;MLEAF=0.500;MQ=60.00;MQRankSum=0.000;QD=19.46;ReadPosRankSum=-0.339;SOR=0.684	GT:AD:DP:GQ:PL	0/1:33,35:68:99:1331,0,1499	4	5.52679	4.58011	0.198542	3.35329	3.35545	0
d225023	Ib	ThrRS	FBgn0027081	1	2L:12106021	0.823529	2L	12106021	A	G	AG	TRUE	51	1399.6	AC=1;AF=0.500;AN=2;BaseQRankSum=3.342;DP=51;ExcessHet=3.0103;FS=0.000;MLEAC=1;MLEAF=0.500;MQ=60.00;MQRankSum=0.000;QD=27.44;ReadPosRankSum=-1.735;SOR=0.527	GT:AD:DP:GQ:PL	0/1:9,42:51:99:1407,0,152	4	5.11791	5.14664	0.914631	2.22626	2.05694	0
d225023	Ib	Rab6	FBgn0015797	-1	2L:12107332	0.387097	2L	12107332	T	C	AG	TRUE	31	332.6	AC=1;AF=0.500;AN=2;BaseQRankSum=1.068;DP=31;ExcessHet=3.0103;FS=0.000;MLEAC=1;MLEAF=0.500;MQ=60.00;MQRankSum=0.000;QD=10.73;ReadPosRankSum=-1.629;SOR=0.693	GT:AD:DP:GQ:PL	0/1:19,12:31:99:340,0,553	4	5.65149	5.3903	0.997475	2.97474	2.86663	0
d225023	Ib	CG16974	FBgn0032479	-1	2L:13189312	0.317308	2L	13189312	T	C	AG	TRUE	104	785.6	AC=1;AF=0.500;AN=2;BaseQRankSum=1.390;DP=104;ExcessHet=3.0103;FS=0.795;MLEAC=1;MLEAF=0.500;MQ=60.00;MQRankSum=0.000;QD=7.55;ReadPosRankSum=1.810;SOR=0.570	GT:AD:DP:GQ:PL	0/1:71,33:104:99:793,0,2140	4	3.8107	3.63081	0.755289	1.61977	1.51626	0
d225023	Ib	RpL24	FBgn0032518	-1	2L:13394077	1	2L	13394077	T	C	AG	TRUE	21	722.03	AC=2;AF=1.00;AN=2;DP=21;ExcessHet=3.0103;FS=0.000;MLEAC=2;MLEAF=1.00;MQ=60.00;QD=34.38;SOR=1.230	GT:AD:DP:GQ:PL	1/1:0,21:21:63:736,63,0	4	11.1577	11.3686	0.00168671	10.7441	10.5771	0
d225023	Ib	Smg5	FBgn0019890	-1	2L:13900038	1	2L	13900038	T	C	AG	TRUE	72	2697.03	AC=2;AF=1.00;AN=2;DP=72;ExcessHet=3.0103;FS=0.000;MLEAC=2;MLEAF=1.00;MQ=60.00;QD=25.77;SOR=2.115	GT:AD:DP:GQ:PL	1/1:0,72:72:99:2711,217,0	4	2.63722	3.52701	0.00709555	2.46817	2.16913	0
d225023	Ib	nAChRalpha5	FBgn0028875	1	2L:14089204	1	2L	14089204	A	G	AG	TRUE	138	5084.03	AC=2;AF=1.00;AN=2;DP=138;ExcessHet=3.0103;FS=0.000;MLEAC=2;MLEAF=1.00;MQ=60.00;QD=26.98;SOR=2.593	GT:AD:DP:GQ:PL	1/1:0,138:138:99:5098,413,0	4	2.17311	2.13145	0.632364	0.0571794	0.030452	0
d225023	Ib	nAChRalpha5	FBgn0028875	1	2L:14089221	0.330986	2L	14089221	A	G	AG	TRUE	142	1106.6	AC=1;AF=0.500;AN=2;BaseQRankSum=3.082;DP=142;ExcessHet=3.0103;FS=0.783;MLEAC=1;MLEAF=0.500;MQ=60.00;MQRankSum=0.000;QD=7.79;ReadPosRankSum=0.904;SOR=0.554	GT:AD:DP:GQ:PL	0/1:95,47:142:99:1114,0,2819	4	2.17311	2.13145	0.632364	0.0571794	0.030452	0
d225023	Ib	nAChRalpha5	FBgn0028875	1	2L:14089236	0.706897	2L	14089236	A	G	AG	TRUE	116	2984.6	AC=1;AF=0.500;AN=2;BaseQRankSum=4.698;DP=116;ExcessHet=3.0103;FS=4.143;MLEAC=1;MLEAF=0.500;MQ=60.00;MQRankSum=0.000;QD=25.73;ReadPosRankSum=0.413;SOR=1.180	GT:AD:DP:GQ:PL	0/1:34,82:116:99:2992,0,809	4	2.17311	2.13145	0.632364	0.0571794	0.030452	0
d225023	Ib	nAChRalpha5	FBgn0028875	1	2L:14089246	0.440367	2L	14089246	A	G	AG	TRUE	109	1317.6	AC=1;AF=0.500;AN=2;BaseQRankSum=3.629;DP=109;ExcessHet=3.0103;FS=3.803;MLEAC=1;MLEAF=0.500;MQ=60.00;MQRankSum=0.000;QD=12.09;ReadPosRankSum=-0.064;SOR=0.403	GT:AD:DP:GQ:PL	0/1:61,48:109:99:1325,0,2069	4	2.17311	2.13145	0.632364	0.0571794	0.030452	0
d225023	Ib	toc	FBgn0015600	-1	2L:3127431	1	2L	3127431	T	C	AG	TRUE	15	479.03	AC=2;AF=1.00;AN=2;DP=15;ExcessHet=3.0103;FS=0.000;MLEAC=2;MLEAF=1.00;MQ=60.00;QD=31.94;SOR=1.911	GT:AD:DP:GQ:PL	1/1:0,15:15:44:493,44,0	4	2.90338	3.0015	0.854332	0.60002	0.848108	0
d225023	Ib	toc	FBgn0015600	-1	2L:3127506	1	2L	3127506	T	C	AG	TRUE	17	643.03	AC=2;AF=1.00;AN=2;DP=17;ExcessHet=3.0103;FS=0.000;MLEAC=2;MLEAF=1.00;MQ=60.00;QD=33.78;SOR=0.804	GT:AD:DP:GQ:PL	1/1:0,17:17:51:657,51,0	4	2.90338	3.0015	0.854332	0.60002	0.848108	0
d225023	Ib	Hydr2	FBgn0014906	1	2L:3167771	1	2L	3167771	A	G	AG	TRUE	61	2203.03	AC=2;AF=1.00;AN=2;DP=61;ExcessHet=3.0103;FS=0.000;MLEAC=2;MLEAF=1.00;MQ=60.00;QD=29.63;SOR=1.609	GT:AD:DP:GQ:PL	1/1:0,61:61:99:2217,184,0	4	2.47882	1.81392	0.0606409	0.927258	1.49242	0
d225023	Ib	CG9662	FBgn0031529	-1	2L:3375848	1	2L	3375848	T	C	AG	TRUE	12	451.02	AC=2;AF=1.00;AN=2;DP=12;ExcessHet=3.0103;FS=0.000;MLEAC=2;MLEAF=1.00;MQ=60.00;QD=31.40;SOR=5.136	GT:AD:DP:GQ:PL	1/1:0,12:12:36:465,36,0	4	4.79971	4.26303	0.58721	2.25071	2.37554	0
d225023	Ib	Thor	FBgn0261560	1	2L:3478627	0.598958	2L	3478627	A	G	AG	TRUE	192	3584.6	AC=1;AF=0.500;AN=2;BaseQRankSum=7.616;DP=192;ExcessHet=3.0103;FS=7.334;MLEAC=1;MLEAF=0.500;MQ=60.00;MQRankSum=0.000;QD=18.67;ReadPosRankSum=2.426;SOR=0.531	GT:AD:DP:GQ:PL	0/1:77,115:192:99:3592,0,1783	4	4.02038	3.58018	0.652908	11.318	10.933	0
d225023	Ib	Msp300	FBgn0261836	1	2L:5205966	0.565217	2L	5205966	A	G	AG	TRUE	69	1574.6	AC=1;AF=0.500;AN=2;BaseQRankSum=4.433;DP=69;ExcessHet=3.0103;FS=4.824;MLEAC=1;MLEAF=0.500;MQ=60.00;MQRankSum=0.000;QD=22.82;ReadPosRankSum=0.188;SOR=0.313	GT:AD:DP:GQ:PL	0/1:30,39:69:99:1582,0,1141	4	5.66863	5.5634	0.880478	3.31906	3.19027	0
d225023	Ib	Msp300	FBgn0261836	1	2L:5206015	0.38806	2L	5206015	A	G	AG	TRUE	67	745.6	AC=1;AF=0.500;AN=2;BaseQRankSum=5.260;DP=67;ExcessHet=3.0103;FS=0.976;MLEAC=1;MLEAF=0.500;MQ=60.00;MQRankSum=0.000;QD=11.13;ReadPosRankSum=0.909;SOR=0.869	GT:AD:DP:GQ:PL	0/1:41,26:67:99:753,0,1167	4	5.66863	5.5634	0.880478	3.31906	3.19027	0
d225023	Ib	muc	FBgn0283658	1	2L:7429847	0.46875	2L	7429847	A	G	AG	TRUE	32	571.6	AC=1;AF=0.500;AN=2;BaseQRankSum=-2.925;DP=32;ExcessHet=3.0103;FS=29.808;MLEAC=1;MLEAF=0.500;MQ=60.00;MQRankSum=0.000;QD=17.86;ReadPosRankSum=-1.369;SOR=5.548	GT:AD:DP:GQ:PL	0/1:17,15:32:99:579,0,669	4	4.74482	3.37582	0.364846	4.13376	4.20774	0
d225023	Ib	Drep3	FBgn0028407	1	2R:12062006	1	2R	12062006	A	G	AG	TRUE	27	903.03	AC=2;AF=1.00;AN=2;DP=27;ExcessHet=3.0103;FS=0.000;MLEAC=2;MLEAF=1.00;MQ=60.00;QD=33.45;SOR=0.765	GT:AD:DP:GQ:PL	1/1:0,27:27:81:917,81,0	4	3.12174	3.72334	0.5785	0.173035	0.00806535	0
d225023	Ib	Iswi	FBgn0011604	1	2R:12640166	0.933333	2R	12640166	A	G	AG	TRUE	90	2698.03	AC=2;AF=1.00;AN=2;BaseQRankSum=1.403;DP=90;ExcessHet=3.0103;FS=1.745;MLEAC=2;MLEAF=1.00;MQ=60.00;MQRankSum=0.000;QD=29.98;ReadPosRankSum=-0.957;SOR=1.347	GT:AD:DP:GQ:PL	1/1:6,84:90:80:2712,80,0	4	1.73776	1.85279	0.924477	0.437872	0.449027	0
d225023	Ib	GLS	FBgn0261625	-1	2R:12671884	1	2R	12671884	T	C	AG	TRUE	16	573.03	AC=2;AF=1.00;AN=2;DP=16;ExcessHet=3.0103;FS=0.000;MLEAC=2;MLEAF=1.00;MQ=60.00;QD=33.67;SOR=0.941	GT:AD:DP:GQ:PL	1/1:0,16:16:48:587,48,0	4	3.11216	3.49617	0.657215	0.866847	1.01098	0
d225023	Ib	CG3955	FBgn0033793	-1	2R:13128147	1	2R	13128147	T	C	AG	TRUE	26	938.03	AC=2;AF=1.00;AN=2;DP=26;ExcessHet=3.0103;FS=0.000;MLEAC=2;MLEAF=1.00;MQ=60.00;QD=30.93;SOR=1.445	GT:AD:DP:GQ:PL	1/1:0,26:26:78:952,78,0	4	4.54626	4.75042	0.982538	0.118374	0.14535	0
d225023	Ib	bbc	FBgn0033844	-1	2R:13486995	1	2R	13486995	T	C	AG	TRUE	52	1711.03	AC=2;AF=1.00;AN=2;DP=52;ExcessHet=3.0103;FS=0.000;MLEAC=2;MLEAF=1.00;MQ=60.00;QD=32.90;SOR=3.528	GT:AD:DP:GQ:PL	1/1:0,52:52:99:1725,155,0	4	2.43079	2.35712	0.725008	1.06293	1.18129	0
d225023	Ib	CG6329	FBgn0033872	1	2R:13832539	0.12	2R	13832539	A	G	AG	TRUE	50	75.6	AC=1;AF=0.500;AN=2;BaseQRankSum=5.289;DP=50;ExcessHet=3.0103;FS=3.990;MLEAC=1;MLEAF=0.500;MQ=60.00;MQRankSum=0.000;QD=1.51;ReadPosRankSum=2.422;SOR=1.552	GT:AD:DP:GQ:PL	0/1:44,6:50:83:83,0,1345	4	6.30782	5.19838	0.0246684	0.326178	0.229277	0
d225023	Ib	ReepB	FBgn0033906	1	2R:14172781	0.269634	2R	14172781	A	G	AG	TRUE	385	2543.6	AC=1;AF=0.500;AN=2;BaseQRankSum=6.167;DP=385;ExcessHet=3.0103;FS=0.000;MLEAC=1;MLEAF=0.500;MQ=60.00;MQRankSum=0.000;QD=6.66;ReadPosRankSum=-0.324;SOR=0.658	GT:AD:DP:GQ:PL	0/1:279,103:382:99:2551,0,8431	4	8.82339	8.47452	0.973655	7.40431	7.35215	0
d225023	Ib	ReepB	FBgn0033906	1	2R:14172820	0.282799	2R	14172820	A	G	AG	TRUE	343	2489.6	AC=1;AF=0.500;AN=2;BaseQRankSum=9.423;DP=343;ExcessHet=3.0103;FS=5.153;MLEAC=1;MLEAF=0.500;MQ=60.00;MQRankSum=0.000;QD=7.26;ReadPosRankSum=1.945;SOR=0.390	GT:AD:DP:GQ:PL	0/1:246,97:343:99:2497,0,6671	4	8.82339	8.47452	0.973655	7.40431	7.35215	0
d225023	Ib	tun	FBgn0034046	1	2R:15849299	1	2R	15849299	A	G	AG	TRUE	13	449.02	AC=2;AF=1.00;AN=2;DP=13;ExcessHet=3.0103;FS=0.000;MLEAC=2;MLEAF=1.00;MQ=60.00;QD=34.54;SOR=1.179	GT:AD:DP:GQ:PL	1/1:0,13:13:39:463,39,0	4	2.16697	3.40061	0.15337	0.768101	0.80403	0
d225023	Ib	Diap2	FBgn0015247	-1	2R:15932293	0.333333	2R	15932293	T	C	AG	TRUE	12	107.6	AC=1;AF=0.500;AN=2;BaseQRankSum=-1.210;DP=12;ExcessHet=3.0103;FS=2.632;MLEAC=1;MLEAF=0.500;MQ=60.00;MQRankSum=0.000;QD=8.97;ReadPosRankSum=-0.984;SOR=1.492	GT:AD:DP:GQ:PL	0/1:8,4:12:99:115,0,2112	4	2.21743	2.14379	0.569937	1.94321	1.78065	0
d225023	Ib	Diap2	FBgn0015247	-1	2R:15932857	1	2R	15932857	T	C	AG	TRUE	22	737.03	AC=2;AF=1.00;AN=2;DP=22;ExcessHet=3.0103;FS=0.000;MLEAC=2;MLEAF=1.00;MQ=60.00;QD=33.50;SOR=1.329	GT:AD:DP:GQ:PL	1/1:0,22:22:65:751,65,0	4	2.21743	2.14379	0.569937	1.94321	1.78065	0
d225023	Ib	Diap2	FBgn0015247	-1	2R:15932884	1	2R	15932884	T	C	AG	TRUE	15	508.03	AC=2;AF=1.00;AN=2;DP=15;ExcessHet=3.0103;FS=0.000;MLEAC=2;MLEAF=1.00;MQ=60.00;QD=33.87;SOR=0.818	GT:AD:DP:GQ:PL	1/1:0,15:15:45:522,45,0	4	2.21743	2.14379	0.569937	1.94321	1.78065	0
d225023	Ib	Diap2	FBgn0015247	-1	2R:15933013	1	2R	15933013	T	C	AG	TRUE	19	615.03	AC=2;AF=1.00;AN=2;DP=19;ExcessHet=3.0103;FS=0.000;MLEAC=2;MLEAF=1.00;MQ=60.00;QD=32.37;SOR=0.793	GT:AD:DP:GQ:PL	1/1:0,19:19:57:629,57,0	4	2.21743	2.14379	0.569937	1.94321	1.78065	0
d225023	Ib	EMC7	FBgn0034066	-1	2R:16016880	0.215686	2R	16016880	T	C	AG	TRUE	102	691.6	AC=1;AF=0.500;AN=2;BaseQRankSum=4.865;DP=102;ExcessHet=3.0103;FS=6.368;MLEAC=1;MLEAF=0.500;MQ=60.00;MQRankSum=0.000;QD=6.78;ReadPosRankSum=1.024;SOR=1.281	GT:AD:DP:GQ:PL	0/1:80,22:102:99:699,0,3331	4	5.21612	4.84046	0.677238	4.60568	4.16897	0
d225023	Ib	EMC7	FBgn0034066	-1	2R:16016882	0.22	2R	16016882	T	C	AG	TRUE	100	691.6	AC=1;AF=0.500;AN=2;BaseQRankSum=6.976;DP=100;ExcessHet=3.0103;FS=6.390;MLEAC=1;MLEAF=0.500;MQ=60.00;MQRankSum=0.000;QD=6.92;ReadPosRankSum=0.913;SOR=1.280	GT:AD:DP:GQ:PL	0/1:78,22:100:99:699,0,3331	4	5.21612	4.84046	0.677238	4.60568	4.16897	0
d225023	Ib	CG8405	FBgn0034071	1	2R:16048343	0.166667	2R	16048343	A	G	AG	TRUE	68	101.6	AC=1;AF=0.500;AN=2;BaseQRankSum=1.141;DP=68;ExcessHet=3.0103;FS=1.298;MLEAC=1;MLEAF=0.500;MQ=60.00;MQRankSum=0.000;QD=1.54;SOR=1.123	GT:AD:DP:GQ:PL	0/1:55,11:66:99:109,0,1703	4	2.53302	2.65448	0.692047	1.04381	0.98824	0
d225023	Ib	pAbp	FBgn0265297	1	2R:18146333	0.739623	2R	18146333	A	G	AG	TRUE	265	5900.6	AC=1;AF=0.500;AN=2;BaseQRankSum=2.619;DP=265;ExcessHet=3.0103;FS=0.000;MLEAC=1;MLEAF=0.500;MQ=60.00;MQRankSum=0.000;QD=22.27;ReadPosRankSum=-4.163;SOR=0.720	GT:AD:DP:GQ:PL	0/1:69,196:265:99:5908,0,1489	4	8.63626	8.36071	0.0632563	6.39335	6.25444	0
d225023	Ib	CG14591	FBgn0033054	-1	2R:6037128	1	2R	6037128	T	C	AG	TRUE	19	671.03	AC=2;AF=1.00;AN=2;DP=19;ExcessHet=3.0103;FS=0.000;MLEAC=2;MLEAF=1.00;MQ=60.00;QD=30.96;SOR=1.022	GT:AD:DP:GQ:PL	1/1:0,19:19:57:685,57,0	4	4.47495	4.49171	0.904654	0.132465	0.0680559	0
d225023	Ib	CG14764	FBgn0033236	-1	2R:7954006	1	2R	7954006	T	C	AG	TRUE	13	395.02	AC=2;AF=1.00;AN=2;DP=13;ExcessHet=3.0103;FS=0.000;MLEAC=2;MLEAF=1.00;MQ=60.00;QD=30.39;SOR=2.833	GT:AD:DP:GQ:PL	1/1:0,13:13:39:409,39,0	4	3.63595	4.28822	0.22193	0.652756	0.775469	0
d225023	Ib	CSN4	FBgn0027054	1	2R:7973697	1	2R	7973697	A	G	AG	TRUE	44	1531.03	AC=2;AF=1.00;AN=2;DP=44;ExcessHet=3.0103;FS=0.000;MLEAC=2;MLEAF=1.00;MQ=60.00;QD=34.80;SOR=1.105	GT:AD:DP:GQ:PL	1/1:0,44:44:99:1545,131,0	4	2.71701	2.92813	0.927838	3.57475	3.3122	0
d225023	Ib	CG1902	FBgn0033434	1	2R:9604115	1	2R	9604115	A	G	AG	TRUE	11	367.02	AC=2;AF=1.00;AN=2;DP=11;ExcessHet=3.0103;FS=0.000;MLEAC=2;MLEAF=1.00;MQ=60.00;QD=33.37;SOR=1.270	GT:AD:DP:GQ:PL	1/1:0,11:11:33:381,33,0	4	4.22058	3.69211	0.700445	1.77674	1.66021	0
d225023	Ib	Uba1	FBgn0023143	-1	2R:9688858	0.806452	2R	9688858	T	C	AG	TRUE	93	2479.6	AC=1;AF=0.500;AN=2;BaseQRankSum=5.303;DP=93;ExcessHet=3.0103;FS=1.001;MLEAC=1;MLEAF=0.500;MQ=60.00;MQRankSum=0.000;QD=26.66;ReadPosRankSum=2.305;SOR=0.537	GT:AD:DP:GQ:PL	0/1:18,75:93:99:2487,0,246	4	4.58023	4.88416	0.433921	3.14724	3.06775	0
d225023	Ib	Uba1	FBgn0023143	-1	2R:9689431	1	2R	9689431	T	C	AG	TRUE	25	904.03	AC=2;AF=1.00;AN=2;DP=25;ExcessHet=3.0103;FS=0.000;MLEAC=2;MLEAF=1.00;MQ=60.00;QD=30.00;SOR=1.609	GT:AD:DP:GQ:PL	1/1:0,25:25:75:918,75,0	4	4.58023	4.88416	0.433921	3.14724	3.06775	0
d225023	Ib	Pka-R2	FBgn0022382	-1	2R:9994533	0.580153	2R	9994533	T	C	AG	TRUE	131	2310.6	AC=1;AF=0.500;AN=2;BaseQRankSum=4.138;DP=131;ExcessHet=3.0103;FS=5.692;MLEAC=1;MLEAF=0.500;MQ=60.00;MQRankSum=0.000;QD=17.64;ReadPosRankSum=-0.684;SOR=1.217	GT:AD:DP:GQ:PL	0/1:55,76:131:99:2318,0,1693	4	4.61114	4.8641	0.950267	2.30218	2.12679	0
d225023	Ib	Apt1	FBgn0042138	1	3L:11628408	0.175439	3L	11628408	A	G	AG	TRUE	57	193.6	AC=1;AF=0.500;AN=2;BaseQRankSum=-0.867;DP=57;ExcessHet=3.0103;FS=11.494;MLEAC=1;MLEAF=0.500;MQ=60.00;MQRankSum=0.000;QD=3.40;ReadPosRankSum=-0.844;SOR=2.868	GT:AD:DP:GQ:PL	0/1:47,10:57:99:201,0,1805	4	7.03967	7.08104	0.899746	3.39757	3.11187	0
d225023	Ib	sls	FBgn0086906	-1	3L:2039918	0.194805	3L	2039918	T	C	AG	TRUE	77	248.6	AC=1;AF=0.500;AN=2;BaseQRankSum=1.195;DP=77;ExcessHet=3.0103;FS=19.964;MLEAC=1;MLEAF=0.500;MQ=60.00;MQRankSum=0.000;QD=3.23;ReadPosRankSum=-1.746;SOR=1.804	GT:AD:DP:GQ:PL	0/1:62,15:77:99:256,0,1766	4	1.73916	1.70201	0.199811	4.24108	3.91505	0
d225023	Ib	Hr78	FBgn0015239	-1	3L:21494397	1	3L	21494397	T	C	AG	TRUE	15	661.03	AC=2;AF=1.00;AN=2;DP=15;ExcessHet=3.0103;FS=0.000;MLEAC=2;MLEAF=1.00;MQ=60.00;QD=24.81;SOR=4.047	GT:AD:DP:GQ:PL	1/1:0,15:15:45:675,45,0	4	2.37747	2.44977	0.97355	2.55783	2.44468	0
d225023	Ib	Shab	FBgn0262593	1	3L:2941312	0.4	3L	2941312	A	G	AG	TRUE	20	242.6	AC=1;AF=0.500;AN=2;BaseQRankSum=2.960;DP=20;ExcessHet=3.0103;FS=4.415;MLEAC=1;MLEAF=0.500;MQ=60.00;MQRankSum=0.000;QD=12.13;ReadPosRankSum=-0.116;SOR=0.939	GT:AD:DP:GQ:PL	0/1:12,8:20:99:250,0,337	4	3.60169	2.82872	0.0568977	0.796233	0.656306	0
d225023	Ib	Shab	FBgn0262593	1	3L:2941364	0.382353	3L	2941364	A	G	AG	TRUE	34	330.6	AC=1;AF=0.500;AN=2;BaseQRankSum=2.076;DP=34;ExcessHet=3.0103;FS=0.000;MLEAC=1;MLEAF=0.500;MQ=60.00;MQRankSum=0.000;QD=9.72;ReadPosRankSum=-0.427;SOR=0.895	GT:AD:DP:GQ:PL	0/1:21,13:34:99:338,0,612	4	3.60169	2.82872	0.0568977	0.796233	0.656306	0
d225023	Ib	Shab	FBgn0262593	1	3L:2941426	0.333333	3L	2941426	A	G	AG	TRUE	30	286.6	AC=1;AF=0.500;AN=2;BaseQRankSum=3.290;DP=30;ExcessHet=3.0103;FS=6.368;MLEAC=1;MLEAF=0.500;MQ=60.00;MQRankSum=0.000;QD=9.55;ReadPosRankSum=1.058;SOR=0.132	GT:AD:DP:GQ:PL	0/1:20,10:30:99:294,0,610	4	3.60169	2.82872	0.0568977	0.796233	0.656306	0
d225023	Ib	CG32264	FBgn0052264	-1	3L:3717400	1	3L	3717400	T	C	AG	TRUE	16	634.03	AC=2;AF=1.00;AN=2;DP=16;ExcessHet=3.0103;FS=0.000;MLEAC=2;MLEAF=1.00;MQ=60.00;QD=29.35;SOR=2.049	GT:AD:DP:GQ:PL	1/1:0,16:16:48:648,48,0	4	3.4169	3.8072	0.084539	3.09462	2.70509	0
d225023	Ib	nAChRbeta1	FBgn0000038	1	3L:4429963	1	3L	4429963	A	G	AG	TRUE	14	592.03	AC=2;AF=1.00;AN=2;DP=14;ExcessHet=3.0103;FS=0.000;MLEAC=2;MLEAF=1.00;MQ=60.00;QD=29.75;SOR=1.765	GT:AD:DP:GQ:PL	1/1:0,14:14:42:606,42,0	4	6.35534	5.5438	0.188032	0.118617	0.0901246	0
d225023	Ib	nAChRbeta1	FBgn0000038	1	3L:4429967	0.846154	3L	4429967	A	G	AG	TRUE	13	347.6	AC=1;AF=0.500;AN=2;BaseQRankSum=0.824;DP=13;ExcessHet=3.0103;FS=0.000;MLEAC=1;MLEAF=0.500;MQ=60.00;MQRankSum=0.000;QD=26.74;ReadPosRankSum=-0.398;SOR=0.250	GT:AD:DP:GQ:PL	0/1:2,11:13:33:355,0,33	4	6.35534	5.5438	0.188032	0.118617	0.0901246	0
d225023	Ib	nAChRbeta1	FBgn0000038	1	3L:4430208	0.636364	3L	4430208	A	G	AG	TRUE	11	216.6	AC=1;AF=0.500;AN=2;BaseQRankSum=0.623;DP=11;ExcessHet=3.0103;FS=7.123;MLEAC=1;MLEAF=0.500;MQ=60.00;MQRankSum=0.000;QD=19.69;ReadPosRankSum=2.029;SOR=0.472	GT:AD:DP:GQ:PL	0/1:4,7:11:82:224,0,82	4	6.35534	5.5438	0.188032	0.118617	0.0901246	0
d225023	Ib	Ace	FBgn0000024	-1	3R:13228355	0.769231	3R	13228355	T	C	AG	TRUE	13	403.6	AC=1;AF=0.500;AN=2;BaseQRankSum=-0.647;DP=13;ExcessHet=3.0103;FS=6.368;MLEAC=1;MLEAF=0.500;MQ=60.00;MQRankSum=0.000;QD=31.05;ReadPosRankSum=0.769;SOR=4.003	GT:AD:DP:GQ:PL	0/1:3,10:13:88:411,0,88	4	3.10515	2.74882	0.437998	0.231325	0.192598	0
d225023	Ib	Rbp	FBgn0262483	1	3R:15399446	0.368421	3R	15399446	A	G	AG	TRUE	95	1070.6	AC=1;AF=0.500;AN=2;BaseQRankSum=6.564;DP=95;ExcessHet=3.0103;FS=0.822;MLEAC=1;MLEAF=0.500;MQ=60.00;MQRankSum=0.000;QD=11.27;ReadPosRankSum=-0.166;SOR=0.559	GT:AD:DP:GQ:PL	0/1:60,35:95:99:1078,0,1603	4	4.26678	5.40295	0.000371186	0.0963761	0.0364857	0
d225023	Ib	EndoA	FBgn0038659	1	3R:18907652	0.547619	3R	18907652	A	G	AG	TRUE	84	1614.6	AC=1;AF=0.500;AN=2;BaseQRankSum=2.622;DP=84;ExcessHet=3.0103;FS=7.433;MLEAC=1;MLEAF=0.500;MQ=60.00;MQRankSum=0.000;QD=19.22;ReadPosRankSum=-1.041;SOR=0.242	GT:AD:DP:GQ:PL	0/1:38,46:84:99:1622,0,1047	4	4.7728	5.29408	0.154643	0.85352	0.843628	0
d225023	Ib	EndoA	FBgn0038659	1	3R:18907675	0.369565	3R	18907675	A	G	AG	TRUE	92	1009.6	AC=1;AF=0.500;AN=2;BaseQRankSum=8.120;DP=92;ExcessHet=3.0103;FS=0.000;MLEAC=1;MLEAF=0.500;MQ=60.00;MQRankSum=0.000;QD=10.97;ReadPosRankSum=-1.126;SOR=0.667	GT:AD:DP:GQ:PL	0/1:58,34:92:99:1017,0,2013	4	4.7728	5.29408	0.154643	0.85352	0.843628	0
d225023	Ib	EndoA	FBgn0038659	1	3R:18909164	0.855422	3R	18909164	A	G	AG	TRUE	84	2379.6	AC=1;AF=0.500;AN=2;BaseQRankSum=4.595;DP=84;ExcessHet=3.0103;FS=12.345;MLEAC=1;MLEAF=0.500;MQ=60.00;MQRankSum=0.000;QD=28.67;ReadPosRankSum=-0.364;SOR=0.691	GT:AD:DP:GQ:PL	0/1:12,71:83:86:2387,0,86	4	4.7728	5.29408	0.154643	0.85352	0.843628	0
d225023	Ib	Xrp1	FBgn0261113	1	3R:18918354	0.627119	3R	18918354	A	G	AG	TRUE	59	1054.6	AC=1;AF=0.500;AN=2;BaseQRankSum=0.391;DP=59;ExcessHet=3.0103;FS=4.383;MLEAC=1;MLEAF=0.500;MQ=60.00;MQRankSum=0.000;QD=17.87;ReadPosRankSum=-0.598;SOR=0.245	GT:AD:DP:GQ:PL	0/1:22,37:59:99:1062,0,568	4	6.93525	6.63308	0.99582	5.49922	5.49918	0
d225023	Ib	CG42613	FBgn0261262	1	3R:18977756	1	3R	18977756	A	G	AG	TRUE	52	2029.03	AC=2;AF=1.00;AN=2;DP=52;ExcessHet=3.0103;FS=0.000;MLEAC=2;MLEAF=1.00;MQ=60.00;QD=33.72;SOR=1.244	GT:AD:DP:GQ:PL	1/1:0,52:52:99:2043,156,0	4	3.85208	4.55131	0.161142	0.0438153	0.0533868	0
d225023	Ib	vib	FBgn0267975	-1	3R:19226523	0.571429	3R	19226523	T	C	AG	TRUE	14	237.6	AC=1;AF=0.500;AN=2;BaseQRankSum=2.044;DP=14;ExcessHet=3.0103;FS=2.276;MLEAC=1;MLEAF=0.500;MQ=60.00;MQRankSum=0.000;QD=16.97;ReadPosRankSum=-1.812;SOR=0.959	GT:AD:DP:GQ:PL	0/1:6,8:14:99:245,0,130	4	5.02601	5.14846	0.946513	3.41525	3.2449	0
d225023	Ib	Atpalpha	FBgn0002921	1	3R:20964328	0.147766	3R	20964328	A	G	AG	TRUE	291	598.6	AC=1;AF=0.500;AN=2;BaseQRankSum=3.148;DP=291;ExcessHet=3.0103;FS=2.942;MLEAC=1;MLEAF=0.500;MQ=60.00;MQRankSum=0.000;QD=2.06;ReadPosRankSum=1.310;SOR=0.561	GT:AD:DP:GQ:PL	0/1:248,43:291:99:606,0,7542	4	9.18942	9.08294	0.418439	4.40032	4.50151	0
d225023	Ib	Cow	FBgn0039054	-1	3R:23112549	0.616438	3R	23112549	T	C	AG	TRUE	73	1413.6	AC=1;AF=0.500;AN=2;BaseQRankSum=5.068;DP=73;ExcessHet=3.0103;FS=12.525;MLEAC=1;MLEAF=0.500;MQ=60.00;MQRankSum=0.000;QD=19.36;ReadPosRankSum=-0.028;SOR=0.919	GT:AD:DP:GQ:PL	0/1:28,45:73:99:1421,0,729	4	6.07048	6.14794	0.757327	0.0371922	0.0664222	0
d225023	Ib	ATPsynCF6	FBgn0016119	-1	3R:23355357	0.42	3R	23355357	T	C	AG	TRUE	150	1774.6	AC=1;AF=0.500;AN=2;BaseQRankSum=5.608;DP=150;ExcessHet=3.0103;FS=12.986;MLEAC=1;MLEAF=0.500;MQ=60.00;MQRankSum=0.000;QD=11.83;ReadPosRankSum=0.217;SOR=0.191	GT:AD:DP:GQ:PL	0/1:87,63:150:99:1782,0,2416	4	9.01907	8.99728	0.563116	8.34196	8.52202	0
d225023	Ib	Rpt5	FBgn0028684	1	3R:23754573	0.62	3R	23754573	A	G	AG	TRUE	50	1356.6	AC=1;AF=0.500;AN=2;BaseQRankSum=4.526;DP=50;ExcessHet=3.0103;FS=0.000;MLEAC=1;MLEAF=0.500;MQ=60.00;MQRankSum=0.000;QD=27.13;ReadPosRankSum=-3.838;SOR=1.298	GT:AD:DP:GQ:PL	0/1:19,31:50:99:1364,0,779	4	5.93216	6.10852	0.925004	5.71526	5.18509	0
d225023	Ib	Gdh	FBgn0001098	-1	3R:23936205	0.27957	3R	23936205	T	C	AG	TRUE	93	611.6	AC=1;AF=0.500;AN=2;BaseQRankSum=4.126;DP=93;ExcessHet=3.0103;FS=6.432;MLEAC=1;MLEAF=0.500;MQ=60.00;MQRankSum=0.000;QD=6.58;ReadPosRankSum=-0.892;SOR=1.456	GT:AD:DP:GQ:PL	0/1:67,26:93:99:619,0,2015	4	6.73636	5.26871	0.00814535	4.37474	4.57326	0
d225023	Ib	slo	FBgn0003429	1	3R:24707423	1	3R	24707423	A	G	AG	TRUE	11	375.02	AC=2;AF=1.00;AN=2;DP=11;ExcessHet=3.0103;FS=0.000;MLEAC=2;MLEAF=1.00;MQ=60.00;QD=34.09;SOR=0.859	GT:AD:DP:GQ:PL	1/1:0,11:11:33:389,33,0	4	3.31874	4.49559	0.310436	1.1716	0.687207	0
d225023	Ib	Npl4	FBgn0039348	-1	3R:25623349	0.315789	3R	25623349	T	C	AG	TRUE	19	163.6	AC=1;AF=0.500;AN=2;BaseQRankSum=3.682;DP=19;ExcessHet=3.0103;FS=0.000;MLEAC=1;MLEAF=0.500;MQ=60.00;MQRankSum=0.000;QD=8.61;ReadPosRankSum=0.529;SOR=0.569	GT:AD:DP:GQ:PL	0/1:13,6:19:99:171,0,346	4	3.48227	4.23072	0.219394	3.06536	2.90157	0
d225023	Ib	Ald1	FBgn0000064	-1	3R:26254245	0.765625	3R	26254245	T	C	AG	TRUE	256	5851.6	AC=1;AF=0.500;AN=2;BaseQRankSum=4.935;DP=256;ExcessHet=3.0103;FS=0.000;MLEAC=1;MLEAF=0.500;MQ=60.00;MQRankSum=0.000;QD=22.86;ReadPosRankSum=0.309;SOR=0.672	GT:AD:DP:GQ:PL	0/1:60,196:256:99:5859,0,1162	4	11.4026	10.0568	0.0414265	10.8637	11.1339	0
d225023	Ib	Ald1	FBgn0000064	-1	3R:26254381	0.738095	3R	26254381	T	C	AG	TRUE	337	8468.6	AC=1;AF=0.500;AN=2;BaseQRankSum=8.812;DP=337;ExcessHet=3.0103;FS=3.439;MLEAC=1;MLEAF=0.500;MQ=60.00;MQRankSum=0.000;QD=25.20;ReadPosRankSum=-0.976;SOR=0.906	GT:AD:DP:GQ:PL	0/1:88,248:336:99:8476,0,2014	4	11.4026	10.0568	0.0414265	10.8637	11.1339	0
d225023	Ib	TfIIA-L	FBgn0011289	1	3R:27255644	0.363636	3R	27255644	A	G	AG	TRUE	110	1181.6	AC=1;AF=0.500;AN=2;BaseQRankSum=8.456;DP=110;ExcessHet=3.0103;FS=1.603;MLEAC=1;MLEAF=0.500;MQ=60.00;MQRankSum=0.000;QD=10.74;ReadPosRankSum=1.871;SOR=0.495	GT:AD:DP:GQ:PL	0/1:70,40:110:99:1189,0,1872	4	2.98054	3.12474	0.877624	2.55085	2.08212	0
d225023	Ib	bigmax	FBgn0039509	-1	3R:27287902	1	3R	27287902	T	C	AG	TRUE	17	595.03	AC=2;AF=1.00;AN=2;DP=17;ExcessHet=3.0103;FS=0.000;MLEAC=2;MLEAF=1.00;MQ=60.00;QD=32.17;SOR=2.179	GT:AD:DP:GQ:PL	1/1:0,17:17:51:609,51,0	4	1.89459	1.57961	0.779446	3.68165	3.47567	0
d225023	Ib	Hmu	FBgn0015737	1	3R:27290230	0.761905	3R	27290230	A	G	AG	TRUE	84	2077.6	AC=1;AF=0.500;AN=2;BaseQRankSum=4.634;DP=84;ExcessHet=3.0103;FS=0.000;MLEAC=1;MLEAF=0.500;MQ=60.00;MQRankSum=0.000;QD=24.73;ReadPosRankSum=-1.829;SOR=0.634	GT:AD:DP:GQ:PL	0/1:20,64:84:99:2085,0,396	4	5.87173	5.77395	0.390105	2.59234	2.73469	0
d225023	Ib	Cnx99A	FBgn0015622	-1	3R:29316804	0.25	3R	29316804	T	C	AG	TRUE	92	828.6	AC=1;AF=0.500;AN=2;BaseQRankSum=6.170;DP=92;ExcessHet=3.0103;FS=4.779;MLEAC=1;MLEAF=0.500;MQ=60.00;MQRankSum=0.000;QD=9.01;ReadPosRankSum=0.291;SOR=0.469	GT:AD:DP:GQ:PL	0/1:69,23:92:99:836,0,2888	4	5.37514	5.28525	0.729489	2.58793	2.27049	0
d225023	Ib	Cnx99A	FBgn0015622	-1	3R:29316843	0.230769	3R	29316843	T	C	AG	TRUE	117	802.6	AC=1;AF=0.500;AN=2;BaseQRankSum=3.457;DP=117;ExcessHet=3.0103;FS=16.236;MLEAC=1;MLEAF=0.500;MQ=60.00;MQRankSum=0.000;QD=6.86;ReadPosRankSum=-1.815;SOR=0.818	GT:AD:DP:GQ:PL	0/1:90,27:117:99:810,0,3372	4	5.37514	5.28525	0.729489	2.58793	2.27049	0
d225023	Ib	Ptp99A	FBgn0004369	1	3R:29483303	1	3R	29483303	A	G	AG	TRUE	29	1038.03	AC=2;AF=1.00;AN=2;DP=29;ExcessHet=3.0103;FS=0.000;MLEAC=2;MLEAF=1.00;MQ=60.00;QD=30.10;SOR=1.942	GT:AD:DP:GQ:PL	1/1:0,29:29:87:1052,87,0	4	4.34922	4.16541	0.576197	1.29803	1.03192	0
d225023	Ib	kay	FBgn0001297	1	3R:29792043	0.936508	3R	29792043	A	G	AG	TRUE	63	1987.03	AC=2;AF=1.00;AN=2;BaseQRankSum=0.673;DP=63;ExcessHet=3.0103;FS=12.772;MLEAC=2;MLEAF=1.00;MQ=60.00;MQRankSum=0.000;QD=31.54;ReadPosRankSum=0.876;SOR=0.357	GT:AD:DP:GQ:PL	1/1:4,59:63:42:2001,42,0	4	5.08707	5.90756	0.125239	4.66592	4.33526	0
d225023	Ib	kay	FBgn0001297	1	3R:29794088	0.181818	3R	29794088	A	G	AG	TRUE	55	168.6	AC=1;AF=0.500;AN=2;BaseQRankSum=2.161;DP=55;ExcessHet=3.0103;FS=2.494;MLEAC=1;MLEAF=0.500;MQ=60.00;MQRankSum=0.000;QD=3.07;ReadPosRankSum=2.194;SOR=0.196	GT:AD:DP:GQ:PL	0/1:45,10:55:99:176,0,1297	4	5.08707	5.90756	0.125239	4.66592	4.33526	0
d225023	Ib	RpS8	FBgn0039713	1	3R:29863650	0.394958	3R	29863650	A	G	AG	TRUE	119	1334.6	AC=1;AF=0.500;AN=2;BaseQRankSum=2.525;DP=119;ExcessHet=3.0103;FS=0.000;MLEAC=1;MLEAF=0.500;MQ=60.00;MQRankSum=0.000;QD=11.22;ReadPosRankSum=-1.128;SOR=0.686	GT:AD:DP:GQ:PL	0/1:72,47:119:99:1342,0,2220	4	12.4079	12.3182	0.473228	11.7965	11.7074	0
d225023	Ib	VhaAC45RP	FBgn0051030	-1	3R:30165949	0.769912	3R	30165949	T	C	AG	TRUE	113	3406.6	AC=1;AF=0.500;AN=2;BaseQRankSum=-0.315;DP=113;ExcessHet=3.0103;FS=0.000;MLEAC=1;MLEAF=0.500;MQ=60.00;MQRankSum=0.000;QD=30.15;ReadPosRankSum=-1.197;SOR=0.663	GT:AD:DP:GQ:PL	0/1:26,87:113:99:3414,0,759	4	6.3392	6.42463	0.721484	0.410326	0.49666	0
d225023	Ib	VhaAC45RP	FBgn0051030	-1	3R:30166167	0.693878	3R	30166167	T	C	AG	TRUE	49	1549.6	AC=1;AF=0.500;AN=2;BaseQRankSum=4.228;DP=49;ExcessHet=3.0103;FS=11.463;MLEAC=1;MLEAF=0.500;MQ=60.00;MQRankSum=0.000;QD=31.62;ReadPosRankSum=0.448;SOR=0.552	GT:AD:DP:GQ:PL	0/1:15,34:49:99:1557,0,643	4	6.3392	6.42463	0.721484	0.410326	0.49666	0
d225023	Ib	VhaAC45RP	FBgn0051030	-1	3R:30166215	0.705882	3R	30166215	T	C	AG	TRUE	68	1603.6	AC=1;AF=0.500;AN=2;BaseQRankSum=5.858;DP=68;ExcessHet=3.0103;FS=0.000;MLEAC=1;MLEAF=0.500;MQ=60.00;MQRankSum=0.000;QD=23.58;ReadPosRankSum=-0.758;SOR=0.782	GT:AD:DP:GQ:PL	0/1:20,48:68:99:1611,0,416	4	6.3392	6.42463	0.721484	0.410326	0.49666	0
d225023	Ib	CG1983	FBgn0039751	-1	3R:30176517	0.696203	3R	30176517	T	C	AG	TRUE	79	2216.6	AC=1;AF=0.500;AN=2;BaseQRankSum=-0.772;DP=79;ExcessHet=3.0103;FS=29.206;MLEAC=1;MLEAF=0.500;MQ=60.00;MQRankSum=0.000;QD=28.06;ReadPosRankSum=-0.659;SOR=0.101	GT:AD:DP:GQ:PL	0/1:24,55:79:99:2224,0,849	4	2.38572	2.69018	0.980606	1.77594	1.87856	0
d225023	Ib	CG1983	FBgn0039751	-1	3R:30176862	0.5	3R	30176862	T	C	AG	TRUE	96	1391.6	AC=1;AF=0.500;AN=2;BaseQRankSum=3.535;DP=96;ExcessHet=3.0103;FS=16.177;MLEAC=1;MLEAF=0.500;MQ=60.00;MQRankSum=0.000;QD=14.50;ReadPosRankSum=0.453;SOR=0.943	GT:AD:DP:GQ:PL	0/1:48,48:96:99:1399,0,1431	4	2.38572	2.69018	0.980606	1.77594	1.87856	0
d225023	Ib	CG9743	FBgn0039756	-1	3R:30198612	1	3R	30198612	T	C	AG	TRUE	19	655.03	AC=2;AF=1.00;AN=2;DP=19;ExcessHet=3.0103;FS=0.000;MLEAC=2;MLEAF=1.00;MQ=60.00;QD=34.48;SOR=0.793	GT:AD:DP:GQ:PL	1/1:0,19:19:57:669,57,0	4	2.09625	3.69448	0.234003	1.02718	1.08195	0
d225023	Ib	CycG	FBgn0039858	-1	3R:31601551	1	3R	31601551	T	C	AG	TRUE	17	588.03	AC=2;AF=1.00;AN=2;DP=17;ExcessHet=3.0103;FS=0.000;MLEAC=2;MLEAF=1.00;MQ=60.00;QD=34.59;SOR=1.061	GT:AD:DP:GQ:PL	1/1:0,17:17:51:602,51,0	4	6.749	7.09638	0.463947	5.43584	5.80647	0
d225023	Ib	cpx	FBgn0041605	1	3R:4297504	0.487047	3R	4297504	A	G	AG	TRUE	194	2836.6	AC=1;AF=0.500;AN=2;BaseQRankSum=7.944;DP=194;ExcessHet=3.0103;FS=7.442;MLEAC=1;MLEAF=0.500;MQ=60.00;MQRankSum=0.000;QD=14.70;ReadPosRankSum=1.731;SOR=0.285	GT:AD:DP:GQ:PL	0/1:99,94:193:99:2844,0,2942	4	7.90852	7.29727	0.637321	0.177459	0.228242	0
d225023	Ib	cpx	FBgn0041605	1	3R:4297517	0.108696	3R	4297517	A	G	AG	TRUE	322	265.6	AC=1;AF=0.500;AN=2;BaseQRankSum=7.342;DP=322;ExcessHet=3.0103;FS=0.853;MLEAC=1;MLEAF=0.500;MQ=60.00;MQRankSum=0.000;QD=0.82;ReadPosRankSum=0.916;SOR=0.546	GT:AD:DP:GQ:PL	0/1:287,35:322:99:273,0,11657	4	7.90852	7.29727	0.637321	0.177459	0.228242	0
d225023	Ib	cpx	FBgn0041605	1	3R:4297518	0.271903	3R	4297518	A	G	AG	TRUE	331	2577.6	AC=1;AF=0.500;AN=2;BaseQRankSum=8.207;DP=331;ExcessHet=3.0103;FS=0.000;MLEAC=1;MLEAF=0.500;MQ=60.00;MQRankSum=0.000;QD=7.79;ReadPosRankSum=0.606;SOR=0.723	GT:AD:DP:GQ:PL	0/1:241,90:331:99:2585,0,7433	4	7.90852	7.29727	0.637321	0.177459	0.228242	0
d225023	Ib	cpx	FBgn0041605	1	3R:4301140	0.204819	3R	4301140	A	G	AG	TRUE	83	313.6	AC=1;AF=0.500;AN=2;BaseQRankSum=2.084;DP=83;ExcessHet=3.0103;FS=0.000;MLEAC=1;MLEAF=0.500;MQ=60.00;MQRankSum=0.000;QD=3.78;ReadPosRankSum=-1.980;SOR=0.754	GT:AD:DP:GQ:PL	0/1:66,17:83:99:321,0,2061	4	7.90852	7.29727	0.637321	0.177459	0.228242	0
d225023	Ib	cpx	FBgn0041605	1	3R:4301200	0.528571	3R	4301200	A	G	AG	TRUE	72	1411.6	AC=1;AF=0.500;AN=2;BaseQRankSum=3.994;DP=72;ExcessHet=3.0103;FS=0.970;MLEAC=1;MLEAF=0.500;MQ=60.00;MQRankSum=0.000;QD=20.17;ReadPosRankSum=0.726;SOR=0.513	GT:AD:DP:GQ:PL	0/1:33,37:70:99:1419,0,1347	4	7.90852	7.29727	0.637321	0.177459	0.228242	0
d225023	Ib	cpx	FBgn0041605	1	3R:4301244	0.125	3R	4301244	A	G	AG	TRUE	48	76.6	AC=1;AF=0.500;AN=2;BaseQRankSum=3.481;DP=48;ExcessHet=3.0103;FS=0.000;MLEAC=1;MLEAF=0.500;MQ=60.00;MQRankSum=0.000;QD=1.60;ReadPosRankSum=0.610;SOR=0.846	GT:AD:DP:GQ:PL	0/1:42,6:48:84:84,0,1682	4	7.90852	7.29727	0.637321	0.177459	0.228242	0
d225023	Ib	cpx	FBgn0041605	1	3R:4301258	0.5	3R	4301258	A	G	AG	TRUE	44	769.6	AC=1;AF=0.500;AN=2;BaseQRankSum=3.714;DP=44;ExcessHet=3.0103;FS=3.119;MLEAC=1;MLEAF=0.500;MQ=60.00;MQRankSum=0.000;QD=17.49;ReadPosRankSum=-1.696;SOR=1.528	GT:AD:DP:GQ:PL	0/1:22,22:44:99:777,0,779	4	7.90852	7.29727	0.637321	0.177459	0.228242	0
d225023	Ib	CG9727	FBgn0037445	-1	3R:6455990	0.324324	3R	6455990	T	C	AG	TRUE	37	333.6	AC=1;AF=0.500;AN=2;BaseQRankSum=4.057;DP=37;ExcessHet=3.0103;FS=1.405;MLEAC=1;MLEAF=0.500;MQ=60.00;MQRankSum=0.000;QD=9.02;ReadPosRankSum=-0.487;SOR=1.123	GT:AD:DP:GQ:PL	0/1:25,12:37:99:341,0,756	4	2.14065	1.48485	0.171049	0.851658	0.906101	0
d225023	Ib	lap	FBgn0086372	1	3R:7192775	0.365854	3R	7192775	A	G	AG	TRUE	41	378.6	AC=1;AF=0.500;AN=2;BaseQRankSum=1.172;DP=41;ExcessHet=3.0103;FS=16.704;MLEAC=1;MLEAF=0.500;MQ=60.00;MQRankSum=0.000;QD=9.23;ReadPosRankSum=1.807;SOR=2.396	GT:AD:DP:GQ:PL	0/1:26,15:41:99:386,0,742	4	2.72103	3.41946	0.288932	0.606361	0.41462	0
d225023	Ib	mmd	FBgn0259110	-1	X:15958587	0.632353	X	15958587	T	C	AG	TRUE	68	1198.6	AC=1;AF=0.500;AN=2;BaseQRankSum=2.144;DP=68;ExcessHet=3.0103;FS=13.646;MLEAC=1;MLEAF=0.500;MQ=60.00;MQRankSum=0.000;QD=17.63;ReadPosRankSum=0.293;SOR=0.916	GT:AD:DP:GQ:PL	0/1:25,43:68:99:1206,0,526	4	3.60097	3.71811	0.935588	0.0811994	0.0553438	0
d225023	Ib	para	FBgn0285944	-1	X:16464719	0.583333	X	16464719	T	C	AG	TRUE	48	871.6	AC=1;AF=0.500;AN=2;BaseQRankSum=3.103;DP=48;ExcessHet=3.0103;FS=0.000;MLEAC=1;MLEAF=0.500;MQ=60.00;MQRankSum=0.000;QD=18.16;ReadPosRankSum=-0.409;SOR=0.569	GT:AD:DP:GQ:PL	0/1:20,28:48:99:879,0,542	4	4.84243	5.41949	0.0668684	0.0459099	0.108431	0
d225023	Ib	Naa15-16	FBgn0031020	1	X:19483997	1	X	19483997	A	G	AG	TRUE	22	744.03	AC=2;AF=1.00;AN=2;DP=22;ExcessHet=3.0103;FS=0.000;MLEAC=2;MLEAF=1.00;MQ=60.00;QD=33.82;SOR=0.874	GT:AD:DP:GQ:PL	1/1:0,22:22:66:758,66,0	4	1.95719	2.3857	0.703725	0.814629	0.878925	0
d225023	Ib	DIP1	FBgn0024807	-1	X:21629725	0.880952	X	21629725	T	C	AG	TRUE	42	1594.6	AC=1;AF=0.500;AN=2;BaseQRankSum=0.364;DP=42;ExcessHet=3.0103;FS=0.000;MLEAC=1;MLEAF=0.500;MQ=60.00;MQRankSum=0.000;QD=29.41;ReadPosRankSum=1.755;SOR=0.513	GT:AD:DP:GQ:PL	0/1:5,37:42:99:1602,0,279	4	4.22571	4.66995	0.917906	1.90808	1.68313	0
d225023	Ib	DIP1	FBgn0024807	-1	X:21629737	0.866667	X	21629737	T	C	AG	TRUE	45	1540.6	AC=1;AF=0.500;AN=2;BaseQRankSum=0.971;DP=45;ExcessHet=3.0103;FS=4.028;MLEAC=1;MLEAF=0.500;MQ=60.00;MQRankSum=0.000;QD=34.24;ReadPosRankSum=1.306;SOR=0.689	GT:AD:DP:GQ:PL	0/1:6,39:45:99:1548,0,309	4	4.22571	4.66995	0.917906	1.90808	1.68313	0
d225023	Ib	Vap33	FBgn0029687	1	X:3953264	0.152778	X	3953264	A	G	AG	TRUE	72	197.6	AC=1;AF=0.500;AN=2;BaseQRankSum=5.302;DP=72;ExcessHet=3.0103;FS=0.000;MLEAC=1;MLEAF=0.500;MQ=60.00;MQRankSum=0.000;QD=2.74;ReadPosRankSum=1.867;SOR=0.462	GT:AD:DP:GQ:PL	0/1:61,11:72:99:205,0,1873	4	6.63427	6.82411	0.460294	4.36447	3.97039	0
d225023	Ib	CG15771	FBgn0029801	1	X:5759154	0.307692	X	5759154	A	G	AG	TRUE	13	93.6	AC=1;AF=0.500;AN=2;BaseQRankSum=1.370;DP=13;ExcessHet=3.0103;FS=6.421;MLEAC=1;MLEAF=0.500;MQ=60.00;MQRankSum=0.000;QD=7.20;ReadPosRankSum=-0.451;SOR=2.910	GT:AD:DP:GQ:PL	0/1:9,4:13:99:101,0,259	4	2.77403	1.38228	0.00798382	0.981371	1.0088	0
d225024	Ib	IA-2	FBgn0031294	-1	2L:1010857	0.56	2L	1010857	T	C	AG	TRUE	75	1216.6	AC=1;AF=0.500;AN=2;BaseQRankSum=4.488;DP=75;ExcessHet=3.0103;FS=7.766;MLEAC=1;MLEAF=0.500;MQ=60.00;MQRankSum=0.000;QD=16.22;ReadPosRankSum=0.231;SOR=0.974	GT:AD:DP:GQ:PL	0/1:33,42:75:99:1224,0,751	4	6.54402	7.83614	2.09102e-08	0.302821	0.331543	3.3505
d225024	Ib	CG33303	FBgn0053303	-1	2L:10374727	0.298507	2L	10374727	T	C	AG	TRUE	67	542.6	AC=1;AF=0.500;AN=2;BaseQRankSum=5.830;DP=67;ExcessHet=3.0103;FS=1.033;MLEAC=1;MLEAF=0.500;MQ=60.00;MQRankSum=0.000;QD=8.10;ReadPosRankSum=1.339;SOR=0.533	GT:AD:DP:GQ:PL	0/1:47,20:67:99:550,0,1396	4	4.82255	3.93282	0.505552	2.43097	2.84372	3.3505
d225024	Ib	CG33303	FBgn0053303	-1	2L:10374859	0.367347	2L	10374859	T	C	AG	TRUE	49	503.6	AC=1;AF=0.500;AN=2;BaseQRankSum=5.262;DP=49;ExcessHet=3.0103;FS=0.000;MLEAC=1;MLEAF=0.500;MQ=60.00;MQRankSum=0.000;QD=10.28;ReadPosRankSum=0.511;SOR=0.551	GT:AD:DP:GQ:PL	0/1:31,18:49:99:511,0,836	4	4.82255	3.93282	0.505552	2.43097	2.84372	3.3505
d225024	Ib	ThrRS	FBgn0027081	1	2L:12106021	0.283784	2L	12106021	A	G	AG	TRUE	74	487.6	AC=1;AF=0.500;AN=2;BaseQRankSum=3.487;DP=74;ExcessHet=3.0103;FS=7.005;MLEAC=1;MLEAF=0.500;MQ=60.00;MQRankSum=0.000;QD=6.59;ReadPosRankSum=0.619;SOR=1.105	GT:AD:DP:GQ:PL	0/1:53,21:74:99:495,0,1493	4	5.11791	5.14664	0.914631	2.22626	2.05694	3.3505
d225024	Ib	CG16974	FBgn0032479	-1	2L:13189312	0.309091	2L	13189312	T	C	AG	TRUE	55	419.6	AC=1;AF=0.500;AN=2;BaseQRankSum=3.797;DP=55;ExcessHet=3.0103;FS=2.409;MLEAC=1;MLEAF=0.500;MQ=60.00;MQRankSum=0.000;QD=7.63;ReadPosRankSum=0.950;SOR=1.061	GT:AD:DP:GQ:PL	0/1:38,17:55:99:427,0,1039	4	3.8107	3.63081	0.755289	1.61977	1.51626	3.3505
d225024	Ib	RpL24	FBgn0032518	-1	2L:13394077	1	2L	13394077	T	C	AG	TRUE	18	677.03	AC=2;AF=1.00;AN=2;DP=18;ExcessHet=3.0103;FS=0.000;MLEAC=2;MLEAF=1.00;MQ=60.00;QD=31.15;SOR=1.493	GT:AD:DP:GQ:PL	1/1:0,18:18:54:691,54,0	4	11.1577	11.3686	0.00168671	10.7441	10.5771	3.3505
d225024	Ib	ND-B14.5B	FBgn0031505	-1	2L:3145125	1	2L	3145125	T	C	AG	TRUE	44	1656.03	AC=2;AF=1.00;AN=2;DP=44;ExcessHet=3.0103;FS=0.000;MLEAC=2;MLEAF=1.00;MQ=60.00;QD=29.00;SOR=3.816	GT:AD:DP:GQ:PL	1/1:0,44:44:99:1670,132,0	4	7.10814	6.50114	0.981134	7.02897	7.05689	3.3505
d225024	Ib	Thor	FBgn0261560	1	2L:3478627	0.198953	2L	3478627	A	G	AG	TRUE	191	771.6	AC=1;AF=0.500;AN=2;BaseQRankSum=6.710;DP=191;ExcessHet=3.0103;FS=1.429;MLEAC=1;MLEAF=0.500;MQ=60.00;MQRankSum=0.000;QD=4.04;ReadPosRankSum=0.800;SOR=0.561	GT:AD:DP:GQ:PL	0/1:153,38:191:99:779,0,3815	4	4.02038	3.58018	0.652908	11.318	10.933	3.3505
d225024	Ib	nclb	FBgn0263510	1	2R:10876649	1	2R	10876649	A	G	AG	TRUE	39	1320.03	AC=2;AF=1.00;AN=2;DP=39;ExcessHet=3.0103;FS=0.000;MLEAC=2;MLEAF=1.00;MQ=60.00;QD=33.85;SOR=2.891	GT:AD:DP:GQ:PL	1/1:0,39:39:99:1334,117,0	4	2.63709	1.58521	0.250542	0.492658	0.759112	3.3505
d225024	Ib	GLS	FBgn0261625	-1	2R:12671884	0.740741	2R	12671884	T	C	AG	TRUE	54	1247.6	AC=1;AF=0.500;AN=2;BaseQRankSum=4.011;DP=54;ExcessHet=3.0103;FS=0.000;MLEAC=1;MLEAF=0.500;MQ=60.00;MQRankSum=0.000;QD=23.10;ReadPosRankSum=-1.229;SOR=0.635	GT:AD:DP:GQ:PL	0/1:14,40:54:99:1255,0,273	4	3.11216	3.49617	0.657215	0.866847	1.01098	3.3505
d225024	Ib	CG6329	FBgn0033872	1	2R:13832539	0.444444	2R	13832539	A	G	AG	TRUE	36	473.6	AC=1;AF=0.500;AN=2;BaseQRankSum=4.080;DP=36;ExcessHet=3.0103;FS=2.880;MLEAC=1;MLEAF=0.500;MQ=60.00;MQRankSum=0.000;QD=13.16;ReadPosRankSum=0.032;SOR=1.244	GT:AD:DP:GQ:PL	0/1:20,16:36:99:481,0,544	4	6.30782	5.19838	0.0246684	0.326178	0.229277	3.3505
d225024	Ib	ReepB	FBgn0033906	1	2R:14172781	0.5	2R	14172781	A	G	AG	TRUE	331	4686.6	AC=1;AF=0.500;AN=2;BaseQRankSum=7.455;DP=331;ExcessHet=3.0103;FS=3.318;MLEAC=1;MLEAF=0.500;MQ=60.00;MQRankSum=0.000;QD=14.20;ReadPosRankSum=-1.765;SOR=0.510	GT:AD:DP:GQ:PL	0/1:165,165:330:99:4694,0,4514	4	8.82339	8.47452	0.973655	7.40431	7.35215	3.3505
d225024	Ib	ReepB	FBgn0033906	1	2R:14172820	0.491525	2R	14172820	A	G	AG	TRUE	295	4502.6	AC=1;AF=0.500;AN=2;BaseQRankSum=10.843;DP=295;ExcessHet=3.0103;FS=0.000;MLEAC=1;MLEAF=0.500;MQ=60.00;MQRankSum=0.000;QD=15.26;ReadPosRankSum=0.551;SOR=0.653	GT:AD:DP:GQ:PL	0/1:150,145:295:99:4510,0,3690	4	8.82339	8.47452	0.973655	7.40431	7.35215	3.3505
d225024	Ib	mRpS16	FBgn0033907	-1	2R:14173081	0.192308	2R	14173081	T	C	AG	TRUE	26	130.6	AC=1;AF=0.500;AN=2;BaseQRankSum=3.021;DP=26;ExcessHet=3.0103;FS=0.000;MLEAC=1;MLEAF=0.500;MQ=60.00;MQRankSum=0.000;QD=5.02;ReadPosRankSum=-0.131;SOR=0.245	GT:AD:DP:GQ:PL	0/1:21,5:26:99:138,0,885	4	2.9769	2.95758	0.828541	2.15934	1.92185	3.3505
d225024	Ib	Ufc1	FBgn0034061	-1	2R:16007210	0.507937	2R	16007210	T	C	AG	TRUE	63	1230.6	AC=1;AF=0.500;AN=2;BaseQRankSum=3.002;DP=63;ExcessHet=3.0103;FS=0.000;MLEAC=1;MLEAF=0.500;MQ=60.00;MQRankSum=0.000;QD=19.53;ReadPosRankSum=-0.159;SOR=0.627	GT:AD:DP:GQ:PL	0/1:31,32:63:99:1238,0,1443	4	3.89671	4.76406	0.198863	4.33244	4.42744	3.3505
d225024	Ib	CG8405	FBgn0034071	1	2R:16048343	0.611111	2R	16048343	A	G	AG	TRUE	36	692.6	AC=1;AF=0.500;AN=2;BaseQRankSum=4.423;DP=36;ExcessHet=3.0103;FS=1.297;MLEAC=1;MLEAF=0.500;MQ=60.00;MQRankSum=0.000;QD=19.24;SOR=0.473	GT:AD:DP:GQ:PL	0/1:14,22:36:99:700,0,312	4	2.53302	2.65448	0.692047	1.04381	0.98824	3.3505
d225024	Ib	pAbp	FBgn0265297	1	2R:18146333	0.165094	2R	18146333	A	G	AG	TRUE	212	579.6	AC=1;AF=0.500;AN=2;BaseQRankSum=4.582;DP=212;ExcessHet=3.0103;FS=0.766;MLEAC=1;MLEAF=0.500;MQ=60.00;MQRankSum=0.000;QD=2.73;ReadPosRankSum=-1.036;SOR=0.798	GT:AD:DP:GQ:PL	0/1:177,35:212:99:587,0,5229	4	8.63626	8.36071	0.0632563	6.39335	6.25444	3.3505
d225024	Ib	CG42518	FBgn0260392	1	2R:18167781	0.697917	2R	18167781	A	G	AG	TRUE	96	2015.6	AC=1;AF=0.500;AN=2;BaseQRankSum=2.538;DP=96;ExcessHet=3.0103;FS=1.896;MLEAC=1;MLEAF=0.500;MQ=60.00;MQRankSum=0.000;QD=21.00;ReadPosRankSum=0.210;SOR=0.954	GT:AD:DP:GQ:PL	0/1:29,67:96:99:2023,0,610	4	3.42584	4.89962	0.0806782	5.74827	5.09481	3.3505
d225024	Ib	CG30116	FBgn0028496	-1	2R:18457250	1	2R	18457250	T	C	AG	TRUE	16	558.03	AC=2;AF=1.00;AN=2;DP=16;ExcessHet=3.0103;FS=0.000;MLEAC=2;MLEAF=1.00;MQ=60.00;QD=34.88;SOR=0.941	GT:AD:DP:GQ:PL	1/1:0,16:16:48:572,48,0	4	2.05783	0.888285	0.000330328	0.132941	0.0831169	3.3505
d225024	Ib	CG13506	FBgn0034723	1	2R:22391510	0.421053	2R	22391510	A	G	AG	TRUE	19	219.6	AC=1;AF=0.500;AN=2;BaseQRankSum=1.689;DP=19;ExcessHet=3.0103;FS=0.000;MLEAC=1;MLEAF=0.500;MQ=60.00;MQRankSum=0.000;QD=11.56;ReadPosRankSum=1.492;SOR=0.976	GT:AD:DP:GQ:PL	0/1:11,8:19:99:227,0,299	4	4.13675	4.31975	0.246252	0.498164	0.623232	3.3505
d225024	Ib	Vha16-1	FBgn0262736	-1	2R:6626171	0.155738	2R	6626171	T	C	AG	TRUE	122	321.6	AC=1;AF=0.500;AN=2;BaseQRankSum=5.622;DP=122;ExcessHet=3.0103;FS=18.806;MLEAC=1;MLEAF=0.500;MQ=60.00;MQRankSum=0.000;QD=2.64;ReadPosRankSum=-2.619;SOR=2.404	GT:AD:DP:GQ:PL	0/1:103,19:122:99:329,0,3116	4	8.42356	8.78145	0.297901	6.11325	6.08202	3.3505
d225024	Ib	CG14764	FBgn0033236	-1	2R:7954006	0.736842	2R	7954006	T	C	AG	TRUE	20	422.6	AC=1;AF=0.500;AN=2;BaseQRankSum=-0.049;DP=20;ExcessHet=3.0103;FS=4.713;MLEAC=1;MLEAF=0.500;MQ=60.00;MQRankSum=0.000;QD=22.24;ReadPosRankSum=-0.638;SOR=0.148	GT:AD:DP:GQ:PL	0/1:5,14:19:92:430,0,92	4	3.63595	4.28822	0.22193	0.652756	0.775469	3.3505
d225024	Ib	CSN4	FBgn0027054	1	2R:7973697	1	2R	7973697	A	G	AG	TRUE	23	855.03	AC=2;AF=1.00;AN=2;DP=23;ExcessHet=3.0103;FS=0.000;MLEAC=2;MLEAF=1.00;MQ=60.00;QD=32.02;SOR=1.179	GT:AD:DP:GQ:PL	1/1:0,23:23:69:869,69,0	4	2.71701	2.92813	0.927838	3.57475	3.3122	3.3505
d225024	Ib	CG12929	FBgn0033429	-1	2R:9586676	1	2R	9586676	T	C	AG	TRUE	29	885.03	AC=2;AF=1.00;AN=2;DP=29;ExcessHet=3.0103;FS=0.000;MLEAC=2;MLEAF=1.00;MQ=60.00;QD=30.52;SOR=2.546	GT:AD:DP:GQ:PL	1/1:0,29:29:87:899,87,0	4	2.88183	3.13243	0.97428	1.637	2.05958	3.3505
d225024	Ib	CG1902	FBgn0033434	1	2R:9604115	0.578947	2R	9604115	A	G	AG	TRUE	38	720.6	AC=1;AF=0.500;AN=2;BaseQRankSum=5.496;DP=38;ExcessHet=3.0103;FS=13.616;MLEAC=1;MLEAF=0.500;MQ=60.00;MQRankSum=0.000;QD=18.96;ReadPosRankSum=-0.972;SOR=0.391	GT:AD:DP:GQ:PL	0/1:16,22:38:99:728,0,443	4	4.22058	3.69211	0.700445	1.77674	1.66021	3.3505
d225024	Ib	Uba1	FBgn0023143	-1	2R:9688858	1	2R	9688858	T	C	AG	TRUE	26	968.03	AC=2;AF=1.00;AN=2;DP=26;ExcessHet=3.0103;FS=0.000;MLEAC=2;MLEAF=1.00;MQ=60.00;QD=34.41;SOR=1.220	GT:AD:DP:GQ:PL	1/1:0,26:26:78:982,78,0	4	4.58023	4.88416	0.433921	3.14724	3.06775	3.3505
d225024	Ib	Pka-R2	FBgn0022382	-1	2R:9994533	0.882353	2R	9994533	T	C	AG	TRUE	17	469.61	AC=1;AF=0.500;AN=2;BaseQRankSum=1.450;DP=17;ExcessHet=3.0103;FS=2.884;MLEAC=1;MLEAF=0.500;MQ=60.00;MQRankSum=0.000;QD=27.62;ReadPosRankSum=1.494;SOR=0.204	GT:AD:DP:GQ:PL	0/1:2,15:17:18:477,0,18	4	4.61114	4.8641	0.950267	2.30218	2.12679	3.3505
d225024	Ib	CycT	FBgn0025455	-1	3L:17552190	1	3L	17552190	T	C	AG	TRUE	16	662.03	AC=2;AF=1.00;AN=2;DP=16;ExcessHet=3.0103;FS=0.000;MLEAC=2;MLEAF=1.00;MQ=60.00;QD=31.50;SOR=2.584	GT:AD:DP:GQ:PL	1/1:0,16:16:48:676,48,0	4	2.71845	3.20759	0.634828	1.54592	1.36132	3.3505
d225024	Ib	nAChRbeta1	FBgn0000038	1	3L:4429963	0.291667	3L	4429963	A	G	AG	TRUE	24	162.6	AC=1;AF=0.500;AN=2;BaseQRankSum=1.390;DP=24;ExcessHet=3.0103;FS=2.161;MLEAC=1;MLEAF=0.500;MQ=60.00;MQRankSum=0.000;QD=6.78;ReadPosRankSum=-1.022;SOR=0.250	GT:AD:DP:GQ:PL	0/1:17,7:24:99:170,0,524	4	6.35534	5.5438	0.188032	0.118617	0.0901246	3.3505
d225024	Ib	nAChRbeta1	FBgn0000038	1	3L:4429967	1	3L	4429967	A	G	AG	TRUE	23	894.03	AC=2;AF=1.00;AN=2;DP=23;ExcessHet=3.0103;FS=0.000;MLEAC=2;MLEAF=1.00;MQ=60.00;QD=27.14;SOR=2.400	GT:AD:DP:GQ:PL	1/1:0,23:23:69:908,69,0	4	6.35534	5.5438	0.188032	0.118617	0.0901246	3.3505
d225024	Ib	Rdl	FBgn0004244	-1	3L:9155218	1	3L	9155218	T	C	AG	TRUE	42	1489.03	AC=2;AF=1.00;AN=2;DP=42;ExcessHet=3.0103;FS=0.000;MLEAC=2;MLEAF=1.00;MQ=60.00;QD=30.54;SOR=2.303	GT:AD:DP:GQ:PL	1/1:0,42:42:99:1503,126,0	4	6.00229	5.65752	0.165943	0.174173	0.0730245	3.3505
d225024	Ib	EndoA	FBgn0038659	1	3R:18909164	0.463415	3R	18909164	A	G	AG	TRUE	41	579.6	AC=1;AF=0.500;AN=2;BaseQRankSum=3.953;DP=41;ExcessHet=3.0103;FS=15.287;MLEAC=1;MLEAF=0.500;MQ=60.00;MQRankSum=0.000;QD=14.14;ReadPosRankSum=1.481;SOR=1.033	GT:AD:DP:GQ:PL	0/1:22,19:41:99:587,0,531	4	4.7728	5.29408	0.154643	0.85352	0.843628	3.3505
d225024	Ib	Xrp1	FBgn0261113	1	3R:18918354	0.416667	3R	18918354	A	G	AG	TRUE	24	265.6	AC=1;AF=0.500;AN=2;BaseQRankSum=2.285;DP=24;ExcessHet=3.0103;FS=0.000;MLEAC=1;MLEAF=0.500;MQ=60.00;MQRankSum=0.000;QD=11.07;ReadPosRankSum=-0.530;SOR=0.693	GT:AD:DP:GQ:PL	0/1:14,10:24:99:273,0,360	4	6.93525	6.63308	0.99582	5.49922	5.49918	3.3505
d225024	Ib	vib	FBgn0267975	-1	3R:19226523	1	3R	19226523	T	C	AG	TRUE	24	885.03	AC=2;AF=1.00;AN=2;DP=24;ExcessHet=3.0103;FS=0.000;MLEAC=2;MLEAF=1.00;MQ=60.00;QD=33.00;SOR=2.494	GT:AD:DP:GQ:PL	1/1:0,24:24:72:899,72,0	4	5.02601	5.14846	0.946513	3.41525	3.2449	3.3505
d225024	Ib	Atpalpha	FBgn0002921	1	3R:20964328	0.10101	3R	20964328	A	G	AG	TRUE	198	59.6	AC=1;AF=0.500;AN=2;BaseQRankSum=0.970;DP=198;ExcessHet=3.0103;FS=3.182;MLEAC=1;MLEAF=0.500;MQ=60.00;MQRankSum=0.000;QD=0.30;ReadPosRankSum=0.039;SOR=1.113	GT:AD:DP:GQ:PL	0/1:178,20:198:67:67,0,5251	4	9.18942	9.08294	0.418439	4.40032	4.50151	3.3505
d225024	Ib	Cow	FBgn0039054	-1	3R:23112549	0.531646	3R	23112549	T	C	AG	TRUE	79	1238.6	AC=1;AF=0.500;AN=2;BaseQRankSum=4.357;DP=79;ExcessHet=3.0103;FS=1.836;MLEAC=1;MLEAF=0.500;MQ=60.00;MQRankSum=0.000;QD=15.68;ReadPosRankSum=1.281;SOR=0.941	GT:AD:DP:GQ:PL	0/1:37,42:79:99:1246,0,936	4	6.07048	6.14794	0.757327	0.0371922	0.0664222	3.3505
d225024	Ib	ATPsynCF6	FBgn0016119	-1	3R:23355357	0.562814	3R	23355357	T	C	AG	TRUE	199	3126.6	AC=1;AF=0.500;AN=2;BaseQRankSum=5.068;DP=199;ExcessHet=3.0103;FS=0.000;MLEAC=1;MLEAF=0.500;MQ=60.00;MQRankSum=0.000;QD=15.71;ReadPosRankSum=-0.891;SOR=0.751	GT:AD:DP:GQ:PL	0/1:87,112:199:99:3134,0,2169	4	9.01907	8.99728	0.563116	8.34196	8.52202	3.3505
d225024	Ib	Gdh	FBgn0001098	-1	3R:23936205	0.939394	3R	23936205	T	C	AG	TRUE	66	2088.03	AC=2;AF=1.00;AN=2;BaseQRankSum=2.251;DP=66;ExcessHet=3.0103;FS=5.406;MLEAC=2;MLEAF=1.00;MQ=60.00;MQRankSum=0.000;QD=31.64;ReadPosRankSum=-1.083;SOR=0.093	GT:AD:DP:GQ:PL	1/1:4,62:66:62:2102,62,0	4	6.73636	5.26871	0.00814535	4.37474	4.57326	3.3505
d225024	Ib	Sec10	FBgn0266673	1	3R:24137107	1	3R	24137107	A	G	AG	TRUE	35	1219.03	AC=2;AF=1.00;AN=2;DP=35;ExcessHet=3.0103;FS=0.000;MLEAC=2;MLEAF=1.00;MQ=60.00;QD=34.83;SOR=1.148	GT:AD:DP:GQ:PL	1/1:0,35:35:99:1233,105,0	4	1.26464	1.79158	0.698029	0.62732	0.751224	3.3505
d225024	Ib	slo	FBgn0003429	1	3R:24675663	1	3R	24675663	A	G	AG	TRUE	12	446.02	AC=2;AF=1.00;AN=2;DP=12;ExcessHet=3.0103;FS=0.000;MLEAC=2;MLEAF=1.00;MQ=60.00;QD=31.02;SOR=1.445	GT:AD:DP:GQ:PL	1/1:0,12:12:36:460,36,0	4	3.31874	4.49559	0.310436	1.1716	0.687207	3.3505
d225024	Ib	Ald1	FBgn0000064	-1	3R:26254245	0.519531	3R	26254245	T	C	AG	TRUE	256	3735.6	AC=1;AF=0.500;AN=2;BaseQRankSum=4.452;DP=256;ExcessHet=3.0103;FS=4.387;MLEAC=1;MLEAF=0.500;MQ=60.00;MQRankSum=0.000;QD=14.59;ReadPosRankSum=-1.069;SOR=0.980	GT:AD:DP:GQ:PL	0/1:123,133:256:99:3743,0,3230	4	11.4026	10.0568	0.0414265	10.8637	11.1339	3.3505
d225024	Ib	Ald1	FBgn0000064	-1	3R:26254381	0.539359	3R	26254381	T	C	AG	TRUE	343	5778.6	AC=1;AF=0.500;AN=2;BaseQRankSum=9.710;DP=343;ExcessHet=3.0103;FS=1.792;MLEAC=1;MLEAF=0.500;MQ=60.00;MQRankSum=0.000;QD=16.85;ReadPosRankSum=1.827;SOR=0.808	GT:AD:DP:GQ:PL	0/1:158,185:343:99:5786,0,4357	4	11.4026	10.0568	0.0414265	10.8637	11.1339	3.3505
d225024	Ib	Hmu	FBgn0015737	1	3R:27290230	0.615385	3R	27290230	A	G	AG	TRUE	13	227.6	AC=1;AF=0.500;AN=2;BaseQRankSum=2.198;DP=13;ExcessHet=3.0103;FS=2.276;MLEAC=1;MLEAF=0.500;MQ=60.00;MQRankSum=0.000;QD=17.51;ReadPosRankSum=0.075;SOR=1.034	GT:AD:DP:GQ:PL	0/1:5,8:13:99:235,0,119	4	5.87173	5.77395	0.390105	2.59234	2.73469	3.3505
d225024	Ib	Gp93	FBgn0039562	1	3R:27951705	0.673913	3R	27951705	A	G	AG	TRUE	46	1242.6	AC=1;AF=0.500;AN=2;BaseQRankSum=2.892;DP=46;ExcessHet=3.0103;FS=2.760;MLEAC=1;MLEAF=0.500;MQ=60.00;MQRankSum=0.000;QD=27.01;ReadPosRankSum=1.047;SOR=1.230	GT:AD:DP:GQ:PL	0/1:15,31:46:99:1250,0,812	4	5.46458	5.53278	0.962357	2.74479	2.53149	3.3505
d225024	Ib	Pkc98E	FBgn0003093	1	3R:29046298	0.708333	3R	29046298	A	G	AG	TRUE	24	656.6	AC=1;AF=0.500;AN=2;BaseQRankSum=1.909;DP=24;ExcessHet=3.0103;FS=0.000;MLEAC=1;MLEAF=0.500;MQ=60.00;MQRankSum=0.000;QD=27.36;ReadPosRankSum=-1.638;SOR=0.551	GT:AD:DP:GQ:PL	0/1:7,17:24:99:664,0,224	4	4.42269	4.69937	0.833844	1.73884	1.5978	3.3505
d225024	Ib	CG1907	FBgn0039674	1	3R:29620590	1	3R	29620590	A	G	AG	TRUE	47	2101.03	AC=2;AF=1.00;AN=2;DP=47;ExcessHet=3.0103;FS=0.000;MLEAC=2;MLEAF=1.00;MQ=60.00;QD=31.63;SOR=1.022	GT:AD:DP:GQ:PL	1/1:0,47:47:99:2115,141,0	4	2.96927	1.9565	0.114002	3.63121	3.23907	3.3505
d225024	Ib	Drice	FBgn0019972	1	3R:29800350	0.742857	3R	29800350	A	G	AG	TRUE	35	710.6	AC=1;AF=0.500;AN=2;BaseQRankSum=1.609;DP=35;ExcessHet=3.0103;FS=1.547;MLEAC=1;MLEAF=0.500;MQ=60.00;MQRankSum=0.000;QD=20.30;ReadPosRankSum=-0.644;SOR=0.905	GT:AD:DP:GQ:PL	0/1:9,26:35:99:718,0,187	4	3.00994	3.58233	0.417715	2.92448	2.78377	3.3505
d225024	Ib	VhaAC45RP	FBgn0051030	-1	3R:30165949	0.745342	3R	30165949	T	C	AG	TRUE	161	4531.6	AC=1;AF=0.500;AN=2;BaseQRankSum=2.910;DP=161;ExcessHet=3.0103;FS=9.977;MLEAC=1;MLEAF=0.500;MQ=60.00;MQRankSum=0.000;QD=28.15;ReadPosRankSum=0.091;SOR=1.046	GT:AD:DP:GQ:PL	0/1:41,120:161:99:4539,0,1292	4	6.3392	6.42463	0.721484	0.410326	0.49666	3.3505
d225024	Ib	VhaAC45RP	FBgn0051030	-1	3R:30166167	0.697248	3R	30166167	T	C	AG	TRUE	109	3319.6	AC=1;AF=0.500;AN=2;BaseQRankSum=6.434;DP=109;ExcessHet=3.0103;FS=0.771;MLEAC=1;MLEAF=0.500;MQ=60.00;MQRankSum=0.000;QD=30.46;ReadPosRankSum=0.013;SOR=0.795	GT:AD:DP:GQ:PL	0/1:33,76:109:99:3327,0,1167	4	6.3392	6.42463	0.721484	0.410326	0.49666	3.3505
d225024	Ib	VhaAC45RP	FBgn0051030	-1	3R:30166215	0.763889	3R	30166215	T	C	AG	TRUE	144	3570.6	AC=1;AF=0.500;AN=2;BaseQRankSum=6.013;DP=144;ExcessHet=3.0103;FS=1.728;MLEAC=1;MLEAF=0.500;MQ=60.00;MQRankSum=0.000;QD=24.80;ReadPosRankSum=2.099;SOR=0.506	GT:AD:DP:GQ:PL	0/1:34,110:144:99:3578,0,668	4	6.3392	6.42463	0.721484	0.410326	0.49666	3.3505
d225024	Ib	cindr	FBgn0027598	1	3R:30826946	0.617647	3R	30826946	A	G	AG	TRUE	34	594.6	AC=1;AF=0.500;AN=2;BaseQRankSum=2.190;DP=34;ExcessHet=3.0103;FS=2.646;MLEAC=1;MLEAF=0.500;MQ=60.00;MQRankSum=0.000;QD=17.49;ReadPosRankSum=0.409;SOR=2.066	GT:AD:DP:GQ:PL	0/1:13,21:34:99:602,0,322	4	3.79459	4.09584	0.742166	2.21586	2.35913	3.3505
d225024	Ib	CycG	FBgn0039858	-1	3R:31601718	0.166667	3R	31601718	T	C	AG	TRUE	12	31.6	AC=1;AF=0.500;AN=2;BaseQRankSum=2.389;DP=12;ExcessHet=3.0103;FS=3.424;MLEAC=1;MLEAF=0.500;MQ=60.00;MQRankSum=0.000;QD=2.63;ReadPosRankSum=2.339;SOR=2.252	GT:AD:DP:GQ:PL	0/1:10,2:12:39:39,0,315	4	6.749	7.09638	0.463947	5.43584	5.80647	3.3505
d225024	Ib	awd	FBgn0000150	-1	3R:31745955	0.774194	3R	31745955	T	C	AG	TRUE	34	632.6	AC=1;AF=0.500;AN=2;BaseQRankSum=-0.244;DP=34;ExcessHet=3.0103;FS=7.186;MLEAC=1;MLEAF=0.500;MQ=60.00;MQRankSum=0.000;QD=20.41;ReadPosRankSum=-0.048;SOR=0.078	GT:AD:DP:GQ:PL	0/1:7,24:31:99:640,0,131	4	11.4307	11.3852	0.780141	9.45494	9.86209	3.3505
d225024	Ib	cpx	FBgn0041605	1	3R:4297504	0.344828	3R	4297504	A	G	AG	TRUE	59	487.6	AC=1;AF=0.500;AN=2;BaseQRankSum=3.327;DP=59;ExcessHet=3.0103;FS=0.000;MLEAC=1;MLEAF=0.500;MQ=60.00;MQRankSum=0.000;QD=8.41;ReadPosRankSum=0.461;SOR=0.598	GT:AD:DP:GQ:PL	0/1:38,20:58:99:495,0,1132	4	7.90852	7.29727	0.637321	0.177459	0.228242	3.3505
d225024	Ib	cpx	FBgn0041605	1	3R:4297517	0.233333	3R	4297517	A	G	AG	TRUE	120	859.6	AC=1;AF=0.500;AN=2;BaseQRankSum=4.012;DP=120;ExcessHet=3.0103;FS=5.375;MLEAC=1;MLEAF=0.500;MQ=60.00;MQRankSum=0.000;QD=7.16;ReadPosRankSum=-1.613;SOR=0.267	GT:AD:DP:GQ:PL	0/1:92,28:120:99:867,0,4398	4	7.90852	7.29727	0.637321	0.177459	0.228242	3.3505
d225024	Ib	cpx	FBgn0041605	1	3R:4297518	0.229508	3R	4297518	A	G	AG	TRUE	122	859.6	AC=1;AF=0.500;AN=2;BaseQRankSum=2.001;DP=122;ExcessHet=3.0103;FS=5.439;MLEAC=1;MLEAF=0.500;MQ=60.00;MQRankSum=0.000;QD=7.05;ReadPosRankSum=-1.410;SOR=0.255	GT:AD:DP:GQ:PL	0/1:94,28:122:99:867,0,4398	4	7.90852	7.29727	0.637321	0.177459	0.228242	3.3505
d225024	Ib	cpx	FBgn0041605	1	3R:4301150	0.610063	3R	4301150	A	G	AG	TRUE	159	3496.6	AC=1;AF=0.500;AN=2;BaseQRankSum=6.550;DP=159;ExcessHet=3.0103;FS=0.000;MLEAC=1;MLEAF=0.500;MQ=60.00;MQRankSum=0.000;QD=21.99;ReadPosRankSum=-1.742;SOR=0.737	GT:AD:DP:GQ:PL	0/1:62,97:159:99:3504,0,1782	4	7.90852	7.29727	0.637321	0.177459	0.228242	3.3505
d225024	Ib	cpx	FBgn0041605	1	3R:4301258	0.109756	3R	4301258	A	G	AG	TRUE	82	87.6	AC=1;AF=0.500;AN=2;BaseQRankSum=4.363;DP=82;ExcessHet=3.0103;FS=7.099;MLEAC=1;MLEAF=0.500;MQ=60.00;MQRankSum=0.000;QD=1.07;ReadPosRankSum=-0.290;SOR=2.527	GT:AD:DP:GQ:PL	0/1:73,9:82:95:95,0,2571	4	7.90852	7.29727	0.637321	0.177459	0.228242	3.3505
d225024	Ib	CG1090	FBgn0037238	1	3R:4365385	0.465116	3R	4365385	A	G	AG	TRUE	43	592.6	AC=1;AF=0.500;AN=2;BaseQRankSum=4.196;DP=43;ExcessHet=3.0103;FS=11.692;MLEAC=1;MLEAF=0.500;MQ=60.00;MQRankSum=0.000;QD=13.78;ReadPosRankSum=0.627;SOR=0.465	GT:AD:DP:GQ:PL	0/1:23,20:43:99:600,0,739	4	4.19836	3.59903	0.876728	0.070259	0.0808403	3.3505
d225024	Ib	CG1090	FBgn0037238	1	3R:4365474	0.166667	3R	4365474	A	G	AG	TRUE	60	193.6	AC=1;AF=0.500;AN=2;BaseQRankSum=4.920;DP=60;ExcessHet=3.0103;FS=3.020;MLEAC=1;MLEAF=0.500;MQ=60.00;MQRankSum=0.000;QD=3.23;ReadPosRankSum=1.258;SOR=1.257	GT:AD:DP:GQ:PL	0/1:50,10:60:99:201,0,1430	4	4.19836	3.59903	0.876728	0.070259	0.0808403	3.3505
d225024	Ib	Vha26	FBgn0283535	1	3R:5594099	0.127273	3R	5594099	A	G	AG	TRUE	55	108.6	AC=1;AF=0.500;AN=2;BaseQRankSum=3.779;DP=55;ExcessHet=3.0103;FS=0.000;MLEAC=1;MLEAF=0.500;MQ=60.00;MQRankSum=0.000;QD=1.97;ReadPosRankSum=-0.646;SOR=0.941	GT:AD:DP:GQ:PL	0/1:48,7:55:99:116,0,1341	4	7.31501	7.15393	0.778039	4.68759	4.94428	3.3505
d225024	Ib	lap	FBgn0086372	1	3R:7192775	0.909091	3R	7192775	A	G	AG	TRUE	11	308.27	AC=2;AF=1.00;AN=2;BaseQRankSum=1.443;DP=11;ExcessHet=3.0103;FS=0.000;MLEAC=1;MLEAF=0.500;MQ=60.00;MQRankSum=0.000;QD=28.02;SOR=0.693	GT:AD:DP:GQ:PL	1/1:1,10:11:2:317,2,0	4	2.72103	3.41946	0.288932	0.606361	0.41462	3.3505
d225024	Ib	mmd	FBgn0259110	-1	X:15958587	1	X	15958587	T	C	AG	TRUE	20	695.03	AC=2;AF=1.00;AN=2;DP=20;ExcessHet=3.0103;FS=0.000;MLEAC=2;MLEAF=1.00;MQ=60.00;QD=34.75;SOR=1.402	GT:AD:DP:GQ:PL	1/1:0,20:20:60:709,60,0	4	3.60097	3.71811	0.935588	0.0811994	0.0553438	3.3505
d225024	Ib	OtopLa	FBgn0259994	-1	X:5631035	1	X	5631035	T	C	AG	TRUE	11	330.02	AC=2;AF=1.00;AN=2;DP=11;ExcessHet=3.0103;FS=0.000;MLEAC=2;MLEAF=1.00;MQ=60.00;QD=30.00;SOR=2.494	GT:AD:DP:GQ:PL	1/1:0,11:11:33:344,33,0	4	4.25873	3.80584	0.230532	0.129723	0.050683	3.3505
d225025	Ib	CG33303	FBgn0053303	-1	2L:10374727	1	2L	10374727	T	C	AG	TRUE	72	2658.03	AC=2;AF=1.00;AN=2;DP=72;ExcessHet=3.0103;FS=0.000;MLEAC=2;MLEAF=1.00;MQ=60.00;QD=29.44;SOR=1.885	GT:AD:DP:GQ:PL	1/1:0,72:72:99:2672,217,0	4	4.82255	3.93282	0.505552	2.43097	2.84372	0
d225025	Ib	CG33303	FBgn0053303	-1	2L:10374859	1	2L	10374859	T	C	AG	TRUE	66	2508.03	AC=2;AF=1.00;AN=2;DP=66;ExcessHet=3.0103;FS=0.000;MLEAC=2;MLEAF=1.00;MQ=60.00;QD=28.78;SOR=1.681	GT:AD:DP:GQ:PL	1/1:0,66:66:99:2522,199,0	4	4.82255	3.93282	0.505552	2.43097	2.84372	0
d225025	Ib	ThrRS	FBgn0027081	1	2L:12106021	1	2L	12106021	A	G	AG	TRUE	40	1380.03	AC=2;AF=1.00;AN=2;DP=40;ExcessHet=3.0103;FS=0.000;MLEAC=2;MLEAF=1.00;MQ=60.00;QD=34.50;SOR=0.693	GT:AD:DP:GQ:PL	1/1:0,40:40:99:1394,119,0	4	5.11791	5.14664	0.914631	2.22626	2.05694	0
d225025	Ib	CG16974	FBgn0032479	-1	2L:13189312	1	2L	13189312	T	C	AG	TRUE	39	1380.03	AC=2;AF=1.00;AN=2;DP=39;ExcessHet=3.0103;FS=0.000;MLEAC=2;MLEAF=1.00;MQ=60.00;QD=26.29;SOR=1.552	GT:AD:DP:GQ:PL	1/1:0,39:39:99:1394,116,0	4	3.8107	3.63081	0.755289	1.61977	1.51626	0
d225025	Ib	CG9662	FBgn0031529	-1	2L:3375848	1	2L	3375848	T	C	AG	TRUE	27	981.03	AC=2;AF=1.00;AN=2;DP=27;ExcessHet=3.0103;FS=0.000;MLEAC=2;MLEAF=1.00;MQ=60.00;QD=32.78;SOR=6.666	GT:AD:DP:GQ:PL	1/1:0,27:27:81:995,81,0	4	4.79971	4.26303	0.58721	2.25071	2.37554	0
d225025	Ib	ReepB	FBgn0033906	1	2R:14172781	0.321429	2R	14172781	A	G	AG	TRUE	252	2171.6	AC=1;AF=0.500;AN=2;BaseQRankSum=8.123;DP=252;ExcessHet=3.0103;FS=2.905;MLEAC=1;MLEAF=0.500;MQ=60.00;MQRankSum=0.000;QD=8.62;ReadPosRankSum=-1.863;SOR=0.950	GT:AD:DP:GQ:PL	0/1:171,81:252:99:2179,0,4926	4	8.82339	8.47452	0.973655	7.40431	7.35215	0
d225025	Ib	ReepB	FBgn0033906	1	2R:14172820	0.316038	2R	14172820	A	G	AG	TRUE	213	1854.6	AC=1;AF=0.500;AN=2;BaseQRankSum=10.424;DP=213;ExcessHet=3.0103;FS=1.519;MLEAC=1;MLEAF=0.500;MQ=60.00;MQRankSum=0.000;QD=8.75;ReadPosRankSum=3.121;SOR=0.860	GT:AD:DP:GQ:PL	0/1:145,67:212:99:1862,0,3770	4	8.82339	8.47452	0.973655	7.40431	7.35215	0
d225025	Ib	mRpS16	FBgn0033907	-1	2R:14173081	1	2R	14173081	T	C	AG	TRUE	54	2478.03	AC=2;AF=1.00;AN=2;DP=54;ExcessHet=3.0103;FS=0.000;MLEAC=2;MLEAF=1.00;MQ=60.00;QD=27.98;SOR=4.654	GT:AD:DP:GQ:PL	1/1:0,54:54:99:2492,172,0	4	2.9769	2.95758	0.828541	2.15934	1.92185	0
d225025	Ib	pAbp	FBgn0265297	1	2R:18146333	1	2R	18146333	A	G	AG	TRUE	82	2966.03	AC=2;AF=1.00;AN=2;DP=82;ExcessHet=3.0103;FS=0.000;MLEAC=2;MLEAF=1.00;MQ=60.00;QD=28.97;SOR=1.193	GT:AD:DP:GQ:PL	1/1:0,81:81:99:2980,243,0	4	8.63626	8.36071	0.0632563	6.39335	6.25444	0
d225025	Ib	Uba1	FBgn0023143	-1	2R:9688858	1	2R	9688858	T	C	AG	TRUE	96	3640.03	AC=2;AF=1.00;AN=2;DP=96;ExcessHet=3.0103;FS=0.000;MLEAC=2;MLEAF=1.00;MQ=60.00;QD=34.40;SOR=0.969	GT:AD:DP:GQ:PL	1/1:0,96:96:99:3654,288,0	4	4.58023	4.88416	0.433921	3.14724	3.06775	0
d225025	Ib	Pka-R2	FBgn0022382	-1	2R:9994533	0.298507	2R	9994533	T	C	AG	TRUE	135	1030.6	AC=1;AF=0.500;AN=2;BaseQRankSum=6.629;DP=135;ExcessHet=3.0103;FS=8.929;MLEAC=1;MLEAF=0.500;MQ=60.00;MQRankSum=0.000;QD=7.69;ReadPosRankSum=-0.282;SOR=1.574	GT:AD:DP:GQ:PL	0/1:94,40:134:99:1038,0,2695	4	4.61114	4.8641	0.950267	2.30218	2.12679	0
d225025	Ib	Shab	FBgn0262593	1	3L:2941364	1	3L	2941364	A	G	AG	TRUE	74	2677.03	AC=2;AF=1.00;AN=2;DP=74;ExcessHet=3.0103;FS=0.000;MLEAC=2;MLEAF=1.00;MQ=60.00;QD=33.08;SOR=6.385	GT:AD:DP:GQ:PL	1/1:0,74:74:99:2691,223,0	4	3.60169	2.82872	0.0568977	0.796233	0.656306	0
d225025	Ib	Shab	FBgn0262593	1	3L:2941426	1	3L	2941426	A	G	AG	TRUE	119	4284.03	AC=2;AF=1.00;AN=2;DP=119;ExcessHet=3.0103;FS=0.000;MLEAC=2;MLEAF=1.00;MQ=60.00;QD=29.09;SOR=5.909	GT:AD:DP:GQ:PL	1/1:0,119:119:99:4298,356,0	4	3.60169	2.82872	0.0568977	0.796233	0.656306	0
d225025	Ib	EndoA	FBgn0038659	1	3R:18910153	1	3R	18910153	A	G	AG	TRUE	37	1318.03	AC=2;AF=1.00;AN=2;DP=37;ExcessHet=3.0103;FS=0.000;MLEAC=2;MLEAF=1.00;MQ=60.00;QD=24.51;SOR=1.121	GT:AD:DP:GQ:PL	1/1:0,37:37:99:1332,111,0	4	4.7728	5.29408	0.154643	0.85352	0.843628	0
d225025	Ib	unk	FBgn0004395	-1	3R:23151701	0.16	3R	23151701	T	C	AG	TRUE	175	404.6	AC=1;AF=0.500;AN=2;BaseQRankSum=2.099;DP=175;ExcessHet=3.0103;FS=22.750;MLEAC=1;MLEAF=0.500;MQ=60.00;MQRankSum=0.000;QD=2.31;ReadPosRankSum=-1.405;SOR=0.049	GT:AD:DP:GQ:PL	0/1:147,28:175:99:412,0,4545	4	3.87848	4.24654	0.727859	1.67041	1.89778	0
d225025	Ib	ATPsynCF6	FBgn0016119	-1	3R:23355357	0.617021	3R	23355357	T	C	AG	TRUE	47	893.6	AC=1;AF=0.500;AN=2;BaseQRankSum=3.129;DP=47;ExcessHet=3.0103;FS=0.000;MLEAC=1;MLEAF=0.500;MQ=60.00;MQRankSum=0.000;QD=19.01;ReadPosRankSum=0.589;SOR=1.280	GT:AD:DP:GQ:PL	0/1:18,29:47:99:901,0,468	4	9.01907	8.99728	0.563116	8.34196	8.52202	0
d225025	Ib	Ald1	FBgn0000064	-1	3R:26254245	0.564815	3R	26254245	T	C	AG	TRUE	108	1723.6	AC=1;AF=0.500;AN=2;BaseQRankSum=1.344;DP=108;ExcessHet=3.0103;FS=38.208;MLEAC=1;MLEAF=0.500;MQ=60.00;MQRankSum=0.000;QD=15.96;ReadPosRankSum=-0.034;SOR=0.033	GT:AD:DP:GQ:PL	0/1:47,61:108:99:1731,0,1228	4	11.4026	10.0568	0.0414265	10.8637	11.1339	0
d225025	Ib	Ald1	FBgn0000064	-1	3R:26254381	0.469388	3R	26254381	T	C	AG	TRUE	98	1404.6	AC=1;AF=0.500;AN=2;BaseQRankSum=4.938;DP=98;ExcessHet=3.0103;FS=13.416;MLEAC=1;MLEAF=0.500;MQ=60.00;MQRankSum=0.000;QD=14.33;ReadPosRankSum=-1.113;SOR=1.202	GT:AD:DP:GQ:PL	0/1:52,46:98:99:1412,0,1540	4	11.4026	10.0568	0.0414265	10.8637	11.1339	0
d225025	Ib	Pkc98E	FBgn0003093	1	3R:29046298	1	3R	29046298	A	G	AG	TRUE	32	1415.03	AC=2;AF=1.00;AN=2;DP=32;ExcessHet=3.0103;FS=0.000;MLEAC=2;MLEAF=1.00;MQ=60.00;QD=31.51;SOR=1.112	GT:AD:DP:GQ:PL	1/1:0,32:32:96:1429,96,0	4	4.42269	4.69937	0.833844	1.73884	1.5978	0
d225025	Ib	CycG	FBgn0039858	-1	3R:31601551	1	3R	31601551	T	C	AG	TRUE	41	1470.03	AC=2;AF=1.00;AN=2;DP=41;ExcessHet=3.0103;FS=0.000;MLEAC=2;MLEAF=1.00;MQ=60.00;QD=30.93;SOR=1.206	GT:AD:DP:GQ:PL	1/1:0,41:41:99:1484,123,0	4	6.749	7.09638	0.463947	5.43584	5.80647	0
d225025	Ib	cpx	FBgn0041605	1	3R:4297504	0.655172	3R	4297504	A	G	AG	TRUE	59	1145.6	AC=1;AF=0.500;AN=2;BaseQRankSum=2.991;DP=59;ExcessHet=3.0103;FS=0.000;MLEAC=1;MLEAF=0.500;MQ=60.00;MQRankSum=0.000;QD=19.75;ReadPosRankSum=-2.213;SOR=0.593	GT:AD:DP:GQ:PL	0/1:20,38:58:99:1153,0,499	4	7.90852	7.29727	0.637321	0.177459	0.228242	0
d225025	Ib	cpx	FBgn0041605	1	3R:4297518	0.375	3R	4297518	A	G	AG	TRUE	112	1193.6	AC=1;AF=0.500;AN=2;BaseQRankSum=6.947;DP=112;ExcessHet=3.0103;FS=2.307;MLEAC=1;MLEAF=0.500;MQ=60.00;MQRankSum=0.000;QD=10.66;ReadPosRankSum=0.228;SOR=0.423	GT:AD:DP:GQ:PL	0/1:70,42:112:99:1201,0,2122	4	7.90852	7.29727	0.637321	0.177459	0.228242	0
d225025	Ib	CG9727	FBgn0037445	-1	3R:6455990	1	3R	6455990	T	C	AG	TRUE	68	2370.03	AC=2;AF=1.00;AN=2;DP=68;ExcessHet=3.0103;FS=0.000;MLEAC=2;MLEAF=1.00;MQ=60.00;QD=34.85;SOR=0.880	GT:AD:DP:GQ:PL	1/1:0,68:68:99:2384,202,0	4	2.14065	1.48485	0.171049	0.851658	0.906101	0
d225026	Ib	14-3-3zeta	FBgn0004907	1	2R:10108800	0.151786	2R	10108800	A	G	AG	TRUE	224	561.6	AC=1;AF=0.500;AN=2;BaseQRankSum=6.660;DP=224;ExcessHet=3.0103;FS=7.472;MLEAC=1;MLEAF=0.500;MQ=60.00;MQRankSum=0.000;QD=2.51;ReadPosRankSum=2.204;SOR=1.394	GT:AD:DP:GQ:PL	0/1:190,34:224:99:569,0,5812	4	10.0161	10.0638	0.920612	8.20641	7.91397	0
d225026	Ib	CG6329	FBgn0033872	1	2R:13832057	1	2R	13832057	A	G	AG	TRUE	72	3191.03	AC=2;AF=1.00;AN=2;DP=72;ExcessHet=3.0103;FS=0.000;MLEAC=2;MLEAF=1.00;MQ=60.00;QD=29.18;SOR=1.308	GT:AD:DP:GQ:PL	1/1:0,72:72:99:3205,217,0	4	6.30782	5.19838	0.0246684	0.326178	0.229277	0
d225026	Ib	CG6329	FBgn0033872	1	2R:13832539	1	2R	13832539	A	G	AG	TRUE	44	1496.03	AC=2;AF=1.00;AN=2;DP=44;ExcessHet=3.0103;FS=0.000;MLEAC=2;MLEAF=1.00;MQ=60.00;QD=34.00;SOR=0.883	GT:AD:DP:GQ:PL	1/1:0,44:44:99:1510,131,0	4	6.30782	5.19838	0.0246684	0.326178	0.229277	0
d225026	Ib	ReepB	FBgn0033906	1	2R:14172781	1	2R	14172781	A	G	AG	TRUE	80	2698.03	AC=2;AF=1.00;AN=2;DP=80;ExcessHet=3.0103;FS=0.000;MLEAC=2;MLEAF=1.00;MQ=60.00;QD=33.73;SOR=2.245	GT:AD:DP:GQ:PL	1/1:0,80:80:99:2712,238,0	4	8.82339	8.47452	0.973655	7.40431	7.35215	0
d225026	Ib	ReepB	FBgn0033906	1	2R:14172820	1	2R	14172820	A	G	AG	TRUE	58	2106.03	AC=2;AF=1.00;AN=2;DP=58;ExcessHet=3.0103;FS=0.000;MLEAC=2;MLEAF=1.00;MQ=60.00;QD=32.38;SOR=2.001	GT:AD:DP:GQ:PL	1/1:0,58:58:99:2120,174,0	4	8.82339	8.47452	0.973655	7.40431	7.35215	0
d225026	Ib	pAbp	FBgn0265297	1	2R:18146333	0.906977	2R	18146333	A	G	AG	TRUE	43	1179.61	AC=1;AF=0.500;AN=2;BaseQRankSum=1.901;DP=43;ExcessHet=3.0103;FS=0.000;MLEAC=1;MLEAF=0.500;MQ=60.00;MQRankSum=0.000;QD=27.43;ReadPosRankSum=0.273;SOR=0.560	GT:AD:DP:GQ:PL	0/1:4,39:43:16:1187,0,16	4	8.63626	8.36071	0.0632563	6.39335	6.25444	0
d225026	Ib	CG14764	FBgn0033236	-1	2R:7954006	1	2R	7954006	T	C	AG	TRUE	94	3145.03	AC=2;AF=1.00;AN=2;DP=94;ExcessHet=3.0103;FS=0.000;MLEAC=2;MLEAF=1.00;MQ=60.00;QD=33.46;SOR=4.548	GT:AD:DP:GQ:PL	1/1:0,94:94:99:3159,282,0	4	3.63595	4.28822	0.22193	0.652756	0.775469	0
d225026	Ib	CycT	FBgn0025455	-1	3L:17552190	1	3L	17552190	T	C	AG	TRUE	50	2188.03	AC=2;AF=1.00;AN=2;DP=50;ExcessHet=3.0103;FS=0.000;MLEAC=2;MLEAF=1.00;MQ=60.00;QD=31.74;SOR=4.977	GT:AD:DP:GQ:PL	1/1:0,50:50:99:2202,149,0	4	2.71845	3.20759	0.634828	1.54592	1.36132	0
d225026	Ib	CG42613	FBgn0261262	1	3R:18977756	1	3R	18977756	A	G	AG	TRUE	27	973.03	AC=2;AF=1.00;AN=2;DP=27;ExcessHet=3.0103;FS=0.000;MLEAC=2;MLEAF=1.00;MQ=60.00;QD=27.15;SOR=6.666	GT:AD:DP:GQ:PL	1/1:0,27:27:81:987,81,0	4	3.85208	4.55131	0.161142	0.0438153	0.0533868	0
d225026	Ib	Cow	FBgn0039054	-1	3R:23112549	0.37963	3R	23112549	T	C	AG	TRUE	108	1224.6	AC=1;AF=0.500;AN=2;BaseQRankSum=8.094;DP=108;ExcessHet=3.0103;FS=1.572;MLEAC=1;MLEAF=0.500;MQ=60.00;MQRankSum=0.000;QD=11.34;ReadPosRankSum=1.064;SOR=0.548	GT:AD:DP:GQ:PL	0/1:67,41:108:99:1232,0,1905	4	6.07048	6.14794	0.757327	0.0371922	0.0664222	0
d225026	Ib	ATPsynCF6	FBgn0016119	-1	3R:23355357	1	3R	23355357	T	C	AG	TRUE	32	1596.03	AC=2;AF=1.00;AN=2;DP=32;ExcessHet=3.0103;FS=0.000;MLEAC=2;MLEAF=1.00;MQ=60.00;QD=31.02;SOR=4.047	GT:AD:DP:GQ:PL	1/1:0,32:32:99:1610,114,0	4	9.01907	8.99728	0.563116	8.34196	8.52202	0
d225026	Ib	Rpt5	FBgn0028684	1	3R:23754573	1	3R	23754573	A	G	AG	TRUE	31	1426.03	AC=2;AF=1.00;AN=2;DP=31;ExcessHet=3.0103;FS=0.000;MLEAC=2;MLEAF=1.00;MQ=60.00;QD=30.39;SOR=6.932	GT:AD:DP:GQ:PL	1/1:0,31:31:96:1440,96,0	4	5.93216	6.10852	0.925004	5.71526	5.18509	0
d225026	Ib	Npl4	FBgn0039348	-1	3R:25623349	1	3R	25623349	T	C	AG	TRUE	43	1609.03	AC=2;AF=1.00;AN=2;DP=43;ExcessHet=3.0103;FS=0.000;MLEAC=2;MLEAF=1.00;MQ=60.00;QD=20.26;SOR=1.455	GT:AD:DP:GQ:PL	1/1:0,43:43:99:1623,129,0	4	3.48227	4.23072	0.219394	3.06536	2.90157	0
d225026	Ib	Ald1	FBgn0000064	-1	3R:26254245	0.23	3R	26254245	T	C	AG	TRUE	100	589.6	AC=1;AF=0.500;AN=2;BaseQRankSum=7.169;DP=100;ExcessHet=3.0103;FS=22.618;MLEAC=1;MLEAF=0.500;MQ=60.00;MQRankSum=0.000;QD=5.90;ReadPosRankSum=-1.539;SOR=4.207	GT:AD:DP:GQ:PL	0/1:77,23:100:99:597,0,2288	4	11.4026	10.0568	0.0414265	10.8637	11.1339	0
d225026	Ib	Ald1	FBgn0000064	-1	3R:26254381	0.19863	3R	26254381	T	C	AG	TRUE	146	658.6	AC=1;AF=0.500;AN=2;BaseQRankSum=5.691;DP=146;ExcessHet=3.0103;FS=8.360;MLEAC=1;MLEAF=0.500;MQ=60.00;MQRankSum=0.000;QD=4.51;ReadPosRankSum=-2.189;SOR=1.162	GT:AD:DP:GQ:PL	0/1:117,29:146:99:666,0,3598	4	11.4026	10.0568	0.0414265	10.8637	11.1339	0
d225026	Ib	Hmu	FBgn0015737	1	3R:27290230	1	3R	27290230	A	G	AG	TRUE	59	2126.03	AC=2;AF=1.00;AN=2;DP=59;ExcessHet=3.0103;FS=0.000;MLEAC=2;MLEAF=1.00;MQ=60.00;QD=29.54;SOR=1.034	GT:AD:DP:GQ:PL	1/1:0,59:59:99:2140,177,0	4	5.87173	5.77395	0.390105	2.59234	2.73469	0
d225026	Ib	RpS8	FBgn0039713	1	3R:29863650	0.365297	3R	29863650	A	G	AG	TRUE	220	2326.6	AC=1;AF=0.500;AN=2;BaseQRankSum=5.511;DP=220;ExcessHet=3.0103;FS=2.985;MLEAC=1;MLEAF=0.500;MQ=60.00;MQRankSum=0.000;QD=10.62;ReadPosRankSum=-1.162;SOR=0.275	GT:AD:DP:GQ:PL	0/1:139,80:219:99:2334,0,4184	4	12.4079	12.3182	0.473228	11.7965	11.7074	0
d225026	Ib	CycG	FBgn0039858	-1	3R:31601718	1	3R	31601718	T	C	AG	TRUE	47	1708.03	AC=2;AF=1.00;AN=2;DP=47;ExcessHet=3.0103;FS=0.000;MLEAC=2;MLEAF=1.00;MQ=60.00;QD=31.17;SOR=1.132	GT:AD:DP:GQ:PL	1/1:0,47:47:99:1722,141,0	4	6.749	7.09638	0.463947	5.43584	5.80647	0
d225027	Ib	Pex19	FBgn0032407	1	2L:12094295	0.474026	2L	12094295	A	G	AG	TRUE	154	2817.6	AC=1;AF=0.500;AN=2;BaseQRankSum=7.453;DP=154;ExcessHet=3.0103;FS=7.084;MLEAC=1;MLEAF=0.500;MQ=60.00;MQRankSum=0.000;QD=18.30;ReadPosRankSum=-1.345;SOR=0.504	GT:AD:DP:GQ:PL	0/1:81,73:154:99:2825,0,3845	4	5.52679	4.58011	0.198542	3.35329	3.35545	0
d225027	Ib	Thor	FBgn0261560	1	2L:3478627	0.967213	2L	3478627	A	G	AG	TRUE	61	2078.03	AC=2;AF=1.00;AN=2;BaseQRankSum=2.068;DP=61;ExcessHet=3.0103;FS=0.000;MLEAC=2;MLEAF=1.00;MQ=60.00;MQRankSum=0.000;QD=34.07;ReadPosRankSum=0.853;SOR=0.871	GT:AD:DP:GQ:PL	1/1:2,59:61:99:2092,133,0	4	4.02038	3.58018	0.652908	11.318	10.933	0
d225027	Ib	ReepB	FBgn0033906	1	2R:14172781	1	2R	14172781	A	G	AG	TRUE	241	8378.03	AC=2;AF=1.00;AN=2;DP=241;ExcessHet=3.0103;FS=0.000;MLEAC=2;MLEAF=1.00;MQ=60.00;QD=34.91;SOR=2.322	GT:AD:DP:GQ:PL	1/1:0,240:240:99:8392,718,0	4	8.82339	8.47452	0.973655	7.40431	7.35215	0
d225027	Ib	ReepB	FBgn0033906	1	2R:14172820	1	2R	14172820	A	G	AG	TRUE	180	6493.03	AC=2;AF=1.00;AN=2;DP=180;ExcessHet=3.0103;FS=0.000;MLEAC=2;MLEAF=1.00;MQ=60.00;QD=31.32;SOR=2.225	GT:AD:DP:GQ:PL	1/1:0,180:180:99:6507,539,0	4	8.82339	8.47452	0.973655	7.40431	7.35215	0
d225027	Ib	Ufc1	FBgn0034061	-1	2R:16007210	1	2R	16007210	T	C	AG	TRUE	67	2949.03	AC=2;AF=1.00;AN=2;DP=67;ExcessHet=3.0103;FS=0.000;MLEAC=2;MLEAF=1.00;MQ=60.00;QD=31.93;SOR=1.828	GT:AD:DP:GQ:PL	1/1:0,67:67:99:2963,205,0	4	3.89671	4.76406	0.198863	4.33244	4.42744	0
d225027	Ib	pAbp	FBgn0265297	1	2R:18146333	0.259804	2R	18146333	A	G	AG	TRUE	204	1241.6	AC=1;AF=0.500;AN=2;BaseQRankSum=6.100;DP=204;ExcessHet=3.0103;FS=15.577;MLEAC=1;MLEAF=0.500;MQ=60.00;MQRankSum=0.000;QD=6.09;ReadPosRankSum=0.114;SOR=1.755	GT:AD:DP:GQ:PL	0/1:151,53:204:99:1249,0,4446	4	8.63626	8.36071	0.0632563	6.39335	6.25444	0
d225027	Ib	CG14764	FBgn0033236	-1	2R:7954006	1	2R	7954006	T	C	AG	TRUE	57	2036.03	AC=2;AF=1.00;AN=2;DP=57;ExcessHet=3.0103;FS=0.000;MLEAC=2;MLEAF=1.00;MQ=60.00;QD=36.93;SOR=1.140	GT:AD:DP:GQ:PL	1/1:0,57:57:99:2050,172,0	4	3.63595	4.28822	0.22193	0.652756	0.775469	0
d225027	Ib	CG1902	FBgn0033434	1	2R:9604115	1	2R	9604115	A	G	AG	TRUE	114	3965.03	AC=2;AF=1.00;AN=2;DP=114;ExcessHet=3.0103;FS=0.000;MLEAC=2;MLEAF=1.00;MQ=60.00;QD=34.78;SOR=0.693	GT:AD:DP:GQ:PL	1/1:0,114:114:99:3979,341,0	4	4.22058	3.69211	0.700445	1.77674	1.66021	0
d225027	Ib	Pka-R2	FBgn0022382	-1	2R:9994533	0.819209	2R	9994533	T	C	AG	TRUE	177	4475.6	AC=1;AF=0.500;AN=2;BaseQRankSum=3.740;DP=177;ExcessHet=3.0103;FS=4.899;MLEAC=1;MLEAF=0.500;MQ=60.00;MQRankSum=0.000;QD=25.29;ReadPosRankSum=-1.194;SOR=1.167	GT:AD:DP:GQ:PL	0/1:32,145:177:99:4483,0,568	4	4.61114	4.8641	0.950267	2.30218	2.12679	0
d225027	Ib	CalpB	FBgn0025866	1	3L:9892134	1	3L	9892134	A	G	AG	TRUE	138	4941.03	AC=2;AF=1.00;AN=2;DP=138;ExcessHet=3.0103;FS=0.000;MLEAC=2;MLEAF=1.00;MQ=60.00;QD=27.04;SOR=1.307	GT:AD:DP:GQ:PL	1/1:0,138:138:99:4955,415,0	4	1.80038	2.71363	0.742166	2.08589	1.42145	0
d225027	Ib	EndoA	FBgn0038659	1	3R:18910153	1	3R	18910153	A	G	AG	TRUE	119	4246.03	AC=2;AF=1.00;AN=2;DP=119;ExcessHet=3.0103;FS=0.000;MLEAC=2;MLEAF=1.00;MQ=60.00;QD=36.02;SOR=1.456	GT:AD:DP:GQ:PL	1/1:0,119:119:99:4260,357,0	4	4.7728	5.29408	0.154643	0.85352	0.843628	0
d225027	Ib	Xrp1	FBgn0261113	1	3R:18918354	1	3R	18918354	A	G	AG	TRUE	43	1469.03	AC=2;AF=1.00;AN=2;DP=43;ExcessHet=3.0103;FS=0.000;MLEAC=2;MLEAF=1.00;MQ=60.00;QD=34.16;SOR=2.147	GT:AD:DP:GQ:PL	1/1:0,43:43:99:1483,129,0	4	6.93525	6.63308	0.99582	5.49922	5.49918	0
d225027	Ib	ATPsynCF6	FBgn0016119	-1	3R:23355357	0.666667	3R	23355357	T	C	AG	TRUE	91	1691.6	AC=1;AF=0.500;AN=2;BaseQRankSum=3.044;DP=91;ExcessHet=3.0103;FS=2.279;MLEAC=1;MLEAF=0.500;MQ=60.00;MQRankSum=0.000;QD=18.80;ReadPosRankSum=-0.515;SOR=1.155	GT:AD:DP:GQ:PL	0/1:30,60:90:99:1699,0,713	4	9.01907	8.99728	0.563116	8.34196	8.52202	0
d225027	Ib	Gdh	FBgn0001098	-1	3R:23936205	1	3R	23936205	T	C	AG	TRUE	20	744.03	AC=2;AF=1.00;AN=2;DP=20;ExcessHet=3.0103;FS=0.000;MLEAC=2;MLEAF=1.00;MQ=60.00;QD=25.83;SOR=0.693	GT:AD:DP:GQ:PL	1/1:0,20:20:60:758,60,0	4	6.73636	5.26871	0.00814535	4.37474	4.57326	0
d225027	Ib	Ald1	FBgn0000064	-1	3R:26254245	0.374046	3R	26254245	T	C	AG	TRUE	263	2512.6	AC=1;AF=0.500;AN=2;BaseQRankSum=5.530;DP=263;ExcessHet=3.0103;FS=2.193;MLEAC=1;MLEAF=0.500;MQ=60.00;MQRankSum=0.000;QD=9.59;ReadPosRankSum=0.275;SOR=0.560	GT:AD:DP:GQ:PL	0/1:164,98:262:99:2520,0,4663	4	11.4026	10.0568	0.0414265	10.8637	11.1339	0
d225027	Ib	Ald1	FBgn0000064	-1	3R:26254381	0.390572	3R	26254381	T	C	AG	TRUE	297	3401.6	AC=1;AF=0.500;AN=2;BaseQRankSum=8.322;DP=297;ExcessHet=3.0103;FS=1.427;MLEAC=1;MLEAF=0.500;MQ=60.00;MQRankSum=0.000;QD=11.45;ReadPosRankSum=0.585;SOR=0.808	GT:AD:DP:GQ:PL	0/1:181,116:297:99:3409,0,5361	4	11.4026	10.0568	0.0414265	10.8637	11.1339	0
d225027	Ib	Hmu	FBgn0015737	1	3R:27290230	1	3R	27290230	A	G	AG	TRUE	126	4373.03	AC=2;AF=1.00;AN=2;DP=126;ExcessHet=3.0103;FS=0.000;MLEAC=2;MLEAF=1.00;MQ=60.00;QD=34.71;SOR=0.725	GT:AD:DP:GQ:PL	1/1:0,126:126:99:4387,377,0	4	5.87173	5.77395	0.390105	2.59234	2.73469	0
d225027	Ib	kay	FBgn0001297	1	3R:29794088	0.888889	3R	29794088	A	G	AG	TRUE	54	1417.6	AC=1;AF=0.500;AN=2;BaseQRankSum=1.829;DP=54;ExcessHet=3.0103;FS=0.000;MLEAC=1;MLEAF=0.500;MQ=60.00;MQRankSum=0.000;QD=26.25;ReadPosRankSum=0.014;SOR=0.976	GT:AD:DP:GQ:PL	0/1:6,48:54:25:1425,0,25	4	5.08707	5.90756	0.125239	4.66592	4.33526	0
d225027	Ib	heca	FBgn0010113	1	3R:30371906	1	3R	30371906	A	G	AG	TRUE	14	503.03	AC=2;AF=1.00;AN=2;DP=14;ExcessHet=3.0103;FS=0.000;MLEAC=2;MLEAF=1.00;MQ=60.00;QD=34.51;SOR=0.693	GT:AD:DP:GQ:PL	1/1:0,14:14:42:517,42,0	4	3.65717	4.55384	0.0179205	1.24003	1.45922	0
d225027	Ib	CG12071	FBgn0039808	-1	3R:30878429	1	3R	30878429	T	C	AG	TRUE	81	2784.03	AC=2;AF=1.00;AN=2;DP=81;ExcessHet=3.0103;FS=0.000;MLEAC=2;MLEAF=1.00;MQ=60.00;QD=34.37;SOR=1.058	GT:AD:DP:GQ:PL	1/1:0,81:81:99:2798,242,0	4	1.75488	1.95826	0.905929	0.244526	0.20508	0
d225027	Ib	ND-B18	FBgn0030605	1	X:15064404	0.972603	X	15064404	A	G	AG	TRUE	73	2597.03	AC=2;AF=1.00;AN=2;BaseQRankSum=2.134;DP=73;ExcessHet=3.0103;FS=4.573;MLEAC=2;MLEAF=1.00;MQ=60.00;MQRankSum=0.000;QD=29.35;ReadPosRankSum=-2.336;SOR=2.932	GT:AD:DP:GQ:PL	1/1:2,71:73:99:2611,154,0	4	7.59932	6.95118	0.954122	6.45447	6.60477	0
d225027	Ib	Frq1	FBgn0030897	1	X:18170126	0.104895	X	18170126	A	G	AG	TRUE	143	85.6	AC=1;AF=0.500;AN=2;BaseQRankSum=2.387;DP=143;ExcessHet=3.0103;FS=5.177;MLEAC=1;MLEAF=0.500;MQ=60.00;MQRankSum=0.000;QD=0.60;ReadPosRankSum=-0.103;SOR=1.582	GT:AD:DP:GQ:PL	0/1:128,15:143:93:93,0,4455	4	6.87486	6.93852	0.801616	0.138615	0.135627	0
d225027	Ib	Vap33	FBgn0029687	1	X:3953264	0.435115	X	3953264	A	G	AG	TRUE	131	1741.6	AC=1;AF=0.500;AN=2;BaseQRankSum=7.837;DP=131;ExcessHet=3.0103;FS=2.366;MLEAC=1;MLEAF=0.500;MQ=60.00;MQRankSum=0.000;QD=13.29;ReadPosRankSum=0.383;SOR=0.989	GT:AD:DP:GQ:PL	0/1:74,57:131:99:1749,0,2047	4	6.63427	6.82411	0.460294	4.36447	3.97039	0
d225028	Ib	CG33303	FBgn0053303	-1	2L:10374727	0.678571	2L	10374727	T	C	AG	TRUE	28	576.6	AC=1;AF=0.500;AN=2;BaseQRankSum=2.082;DP=28;ExcessHet=3.0103;FS=2.009;MLEAC=1;MLEAF=0.500;MQ=60.00;MQRankSum=0.000;QD=20.59;ReadPosRankSum=-0.049;SOR=0.269	GT:AD:DP:GQ:PL	0/1:9,19:28:99:584,0,226	4	4.82255	3.93282	0.505552	2.43097	2.84372	3.77083
d225028	Ib	CG33303	FBgn0053303	-1	2L:10374859	0.538462	2L	10374859	T	C	AG	TRUE	26	427.6	AC=1;AF=0.500;AN=2;BaseQRankSum=3.909;DP=26;ExcessHet=3.0103;FS=1.580;MLEAC=1;MLEAF=0.500;MQ=60.00;MQRankSum=0.000;QD=16.45;ReadPosRankSum=2.019;SOR=0.796	GT:AD:DP:GQ:PL	0/1:12,14:26:99:435,0,331	4	4.82255	3.93282	0.505552	2.43097	2.84372	3.77083
d225028	Ib	Pex19	FBgn0032407	1	2L:12094295	0.480769	2L	12094295	A	G	AG	TRUE	52	931.6	AC=1;AF=0.500;AN=2;BaseQRankSum=3.967;DP=52;ExcessHet=3.0103;FS=1.090;MLEAC=1;MLEAF=0.500;MQ=60.00;MQRankSum=0.000;QD=17.92;ReadPosRankSum=-2.838;SOR=0.460	GT:AD:DP:GQ:PL	0/1:27,25:52:99:939,0,1111	4	5.52679	4.58011	0.198542	3.35329	3.35545	3.77083
d225028	Ib	ThrRS	FBgn0027081	1	2L:12106021	0.521739	2L	12106021	A	G	AG	TRUE	23	330.6	AC=1;AF=0.500;AN=2;BaseQRankSum=2.033;DP=23;ExcessHet=3.0103;FS=0.000;MLEAC=1;MLEAF=0.500;MQ=60.00;MQRankSum=0.000;QD=14.37;ReadPosRankSum=0.340;SOR=0.551	GT:AD:DP:GQ:PL	0/1:11,12:23:99:338,0,310	4	5.11791	5.14664	0.914631	2.22626	2.05694	3.77083
d225028	Ib	CG16974	FBgn0032479	-1	2L:13189312	0.365854	2L	13189312	T	C	AG	TRUE	41	360.6	AC=1;AF=0.500;AN=2;BaseQRankSum=2.397;DP=41;ExcessHet=3.0103;FS=1.242;MLEAC=1;MLEAF=0.500;MQ=60.00;MQRankSum=0.000;QD=8.80;ReadPosRankSum=1.169;SOR=0.701	GT:AD:DP:GQ:PL	0/1:26,15:41:99:368,0,678	4	3.8107	3.63081	0.755289	1.61977	1.51626	3.77083
d225028	Ib	RpL24	FBgn0032518	-1	2L:13394077	1	2L	13394077	T	C	AG	TRUE	19	649.03	AC=2;AF=1.00;AN=2;DP=19;ExcessHet=3.0103;FS=0.000;MLEAC=2;MLEAF=1.00;MQ=60.00;QD=34.16;SOR=1.609	GT:AD:DP:GQ:PL	1/1:0,19:19:57:663,57,0	4	11.1577	11.3686	0.00168671	10.7441	10.5771	3.77083
d225028	Ib	Smg5	FBgn0019890	-1	2L:13900038	1	2L	13900038	T	C	AG	TRUE	38	1347.03	AC=2;AF=1.00;AN=2;DP=38;ExcessHet=3.0103;FS=0.000;MLEAC=2;MLEAF=1.00;MQ=60.00;QD=26.74;SOR=1.493	GT:AD:DP:GQ:PL	1/1:0,38:38:99:1361,114,0	4	2.63722	3.52701	0.00709555	2.46817	2.16913	3.77083
d225028	Ib	chinmo	FBgn0086758	1	2L:1697095	1	2L	1697095	A	G	AG	TRUE	14	495.03	AC=2;AF=1.00;AN=2;DP=14;ExcessHet=3.0103;FS=0.000;MLEAC=2;MLEAF=1.00;MQ=60.00;QD=34.29;SOR=0.693	GT:AD:DP:GQ:PL	1/1:0,14:14:42:509,42,0	4	4.89124	3.28942	2.254e-05	2.01378	1.91915	3.77083
d225028	Ib	Mad	FBgn0011648	-1	2L:3146192	1	2L	3146192	T	C	AG	TRUE	11	364.02	AC=2;AF=1.00;AN=2;DP=11;ExcessHet=3.0103;FS=0.000;MLEAC=2;MLEAF=1.00;MQ=60.00;QD=33.09;SOR=1.802	GT:AD:DP:GQ:PL	1/1:0,11:11:33:378,33,0	4	1.75284	1.88178	0.972851	2.04554	1.70678	3.77083
d225028	Ib	Hydr2	FBgn0014906	1	2L:3167771	1	2L	3167771	A	G	AG	TRUE	55	1990.03	AC=2;AF=1.00;AN=2;DP=55;ExcessHet=3.0103;FS=0.000;MLEAC=2;MLEAF=1.00;MQ=60.00;QD=32.81;SOR=0.804	GT:AD:DP:GQ:PL	1/1:0,55:55:99:2004,165,0	4	2.47882	1.81392	0.0606409	0.927258	1.49242	3.77083
d225028	Ib	CG9662	FBgn0031529	-1	2L:3375848	1	2L	3375848	T	C	AG	TRUE	16	602.03	AC=2;AF=1.00;AN=2;DP=16;ExcessHet=3.0103;FS=0.000;MLEAC=2;MLEAF=1.00;MQ=60.00;QD=26.20;SOR=5.670	GT:AD:DP:GQ:PL	1/1:0,16:16:48:616,48,0	4	4.79971	4.26303	0.58721	2.25071	2.37554	3.77083
d225028	Ib	Msp300	FBgn0261836	1	2L:5164694	0.19403	2L	5164694	A	G	AG	TRUE	67	237.6	AC=1;AF=0.500;AN=2;BaseQRankSum=3.025;DP=67;ExcessHet=3.0103;FS=2.640;MLEAC=1;MLEAF=0.500;MQ=60.00;MQRankSum=0.000;QD=3.55;ReadPosRankSum=-1.566;SOR=1.179	GT:AD:DP:GQ:PL	0/1:54,13:67:99:245,0,1714	4	5.66863	5.5634	0.880478	3.31906	3.19027	3.77083
d225028	Ib	Msp300	FBgn0261836	1	2L:5164718	0.253968	2L	5164718	A	G	AG	TRUE	63	516.6	AC=1;AF=0.500;AN=2;BaseQRankSum=3.898;DP=63;ExcessHet=3.0103;FS=16.791;MLEAC=1;MLEAF=0.500;MQ=60.00;MQRankSum=0.000;QD=8.20;ReadPosRankSum=0.142;SOR=2.567	GT:AD:DP:GQ:PL	0/1:47,16:63:99:524,0,2554	4	5.66863	5.5634	0.880478	3.31906	3.19027	3.77083
d225028	Ib	Msp300	FBgn0261836	1	2L:5205966	0.25	2L	5205966	A	G	AG	TRUE	60	463.6	AC=1;AF=0.500;AN=2;BaseQRankSum=2.321;DP=60;ExcessHet=3.0103;FS=8.625;MLEAC=1;MLEAF=0.500;MQ=60.00;MQRankSum=0.000;QD=7.73;ReadPosRankSum=-1.303;SOR=1.899	GT:AD:DP:GQ:PL	0/1:45,15:60:99:471,0,1872	4	5.66863	5.5634	0.880478	3.31906	3.19027	3.77083
d225028	Ib	Msp300	FBgn0261836	1	2L:5206015	0.373134	2L	5206015	A	G	AG	TRUE	67	537.6	AC=1;AF=0.500;AN=2;BaseQRankSum=0.729;DP=67;ExcessHet=3.0103;FS=3.571;MLEAC=1;MLEAF=0.500;MQ=60.00;MQRankSum=0.000;QD=8.02;ReadPosRankSum=0.416;SOR=0.349	GT:AD:DP:GQ:PL	0/1:42,25:67:99:545,0,1544	4	5.66863	5.5634	0.880478	3.31906	3.19027	3.77083
d225028	Ib	Msp300	FBgn0261836	1	2L:5206020	0.716216	2L	5206020	A	G	AG	TRUE	74	1961.6	AC=1;AF=0.500;AN=2;BaseQRankSum=1.000;DP=74;ExcessHet=3.0103;FS=9.367;MLEAC=1;MLEAF=0.500;MQ=60.00;MQRankSum=0.000;QD=26.51;ReadPosRankSum=0.054;SOR=0.165	GT:AD:DP:GQ:PL	0/1:21,53:74:99:1969,0,665	4	5.66863	5.5634	0.880478	3.31906	3.19027	3.77083
d225028	Ib	nrv2	FBgn0015777	-1	2L:6789976	1	2L	6789976	T	C	AG	TRUE	20	715.03	AC=2;AF=1.00;AN=2;DP=20;ExcessHet=3.0103;FS=0.000;MLEAC=2;MLEAF=1.00;MQ=60.00;QD=29.99;SOR=1.721	GT:AD:DP:GQ:PL	1/1:0,20:20:60:729,60,0	4	3.48474	2.11119	0.017969	1.38147	1.80436	3.77083
d225028	Ib	Nckx30C	FBgn0028704	-1	2L:9717614	0.488889	2L	9717614	T	C	AG	TRUE	45	592.6	AC=1;AF=0.500;AN=2;BaseQRankSum=0.881;DP=45;ExcessHet=3.0103;FS=8.659;MLEAC=1;MLEAF=0.500;MQ=60.00;MQRankSum=0.000;QD=13.17;ReadPosRankSum=1.157;SOR=1.530	GT:AD:DP:GQ:PL	0/1:23,22:45:99:600,0,662	4	4.99389	4.09503	0.0412382	0.0832012	0.108464	3.77083
d225028	Ib	Nckx30C	FBgn0028704	-1	2L:9733349	1	2L	9733349	T	C	AG	TRUE	11	371.02	AC=2;AF=1.00;AN=2;DP=11;ExcessHet=3.0103;FS=0.000;MLEAC=2;MLEAF=1.00;MQ=60.00;QD=33.73;SOR=1.270	GT:AD:DP:GQ:PL	1/1:0,11:11:33:385,33,0	4	4.99389	4.09503	0.0412382	0.0832012	0.108464	3.77083
d225028	Ib	nAChRalpha6	FBgn0032151	-1	2L:9809350	1	2L	9809350	T	C	AG	TRUE	11	481.02	AC=2;AF=1.00;AN=2;DP=11;ExcessHet=3.0103;FS=0.000;MLEAC=2;MLEAF=1.00;MQ=60.00;QD=31.84;SOR=1.802	GT:AD:DP:GQ:PL	1/1:0,11:11:33:495,33,0	4	4.50738	3.70086	0.0554371	0.126891	0.109016	3.77083
d225028	Ib	qvr	FBgn0260499	1	2R:11447607	1	2R	11447607	A	G	AG	TRUE	22	976.03	AC=2;AF=1.00;AN=2;DP=22;ExcessHet=3.0103;FS=0.000;MLEAC=2;MLEAF=1.00;MQ=60.00;QD=29.77;SOR=1.931	GT:AD:DP:GQ:PL	1/1:0,22:22:66:990,66,0	4	3.052	2.03341	0.0334999	0.269526	0.0914841	3.77083
d225028	Ib	Drep3	FBgn0028407	1	2R:12062006	0.4375	2R	12062006	A	G	AG	TRUE	32	350.6	AC=1;AF=0.500;AN=2;BaseQRankSum=0.927;DP=32;ExcessHet=3.0103;FS=1.527;MLEAC=1;MLEAF=0.500;MQ=60.00;MQRankSum=0.000;QD=10.96;ReadPosRankSum=-1.009;SOR=0.430	GT:AD:DP:GQ:PL	0/1:18,14:32:99:358,0,473	4	3.12174	3.72334	0.5785	0.173035	0.00806535	3.77083
d225028	Ib	Iswi	FBgn0011604	1	2R:12640166	0.392857	2R	12640166	A	G	AG	TRUE	28	294.6	AC=1;AF=0.500;AN=2;BaseQRankSum=1.310;DP=28;ExcessHet=3.0103;FS=28.085;MLEAC=1;MLEAF=0.500;MQ=60.00;MQRankSum=0.000;QD=10.52;ReadPosRankSum=-3.146;SOR=4.973	GT:AD:DP:GQ:PL	0/1:17,11:28:99:302,0,485	4	1.73776	1.85279	0.924477	0.437872	0.449027	3.77083
d225028	Ib	NAT1	FBgn0010488	1	2R:12921246	0.351351	2R	12921246	A	G	AG	TRUE	38	323.6	AC=1;AF=0.500;AN=2;BaseQRankSum=3.037;DP=38;ExcessHet=3.0103;FS=0.000;MLEAC=1;MLEAF=0.500;MQ=60.00;MQRankSum=0.000;QD=8.75;ReadPosRankSum=-2.011;SOR=0.519	GT:AD:DP:GQ:PL	0/1:24,13:37:99:331,0,701	4	4.55701	5.52808	0.00301008	4.16676	3.64409	3.77083
d225028	Ib	CG3955	FBgn0033793	-1	2R:13128147	0.571429	2R	13128147	T	C	AG	TRUE	21	353.6	AC=1;AF=0.500;AN=2;BaseQRankSum=1.635;DP=21;ExcessHet=3.0103;FS=2.141;MLEAC=1;MLEAF=0.500;MQ=60.00;MQRankSum=0.000;QD=16.84;ReadPosRankSum=0.571;SOR=1.685	GT:AD:DP:GQ:PL	0/1:9,12:21:99:361,0,224	4	4.54626	4.75042	0.982538	0.118374	0.14535	3.77083
d225028	Ib	CG6329	FBgn0033872	1	2R:13832057	0.623188	2R	13832057	A	G	AG	TRUE	138	3352.6	AC=1;AF=0.500;AN=2;BaseQRankSum=2.978;DP=138;ExcessHet=3.0103;FS=0.000;MLEAC=1;MLEAF=0.500;MQ=60.00;MQRankSum=0.000;QD=24.29;ReadPosRankSum=-2.774;SOR=0.710	GT:AD:DP:GQ:PL	0/1:52,86:138:99:3360,0,2477	4	6.30782	5.19838	0.0246684	0.326178	0.229277	3.77083
d225028	Ib	CG6329	FBgn0033872	1	2R:13832539	0.802469	2R	13832539	A	G	AG	TRUE	81	2458.6	AC=1;AF=0.500;AN=2;BaseQRankSum=4.821;DP=81;ExcessHet=3.0103;FS=2.388;MLEAC=1;MLEAF=0.500;MQ=60.00;MQRankSum=0.000;QD=30.35;ReadPosRankSum=0.483;SOR=0.358	GT:AD:DP:GQ:PL	0/1:16,65:81:99:2466,0,280	4	6.30782	5.19838	0.0246684	0.326178	0.229277	3.77083
d225028	Ib	Prosap	FBgn0040752	-1	2R:14062651	1	2R	14062651	T	C	AG	TRUE	12	374.02	AC=2;AF=1.00;AN=2;DP=12;ExcessHet=3.0103;FS=0.000;MLEAC=2;MLEAF=1.00;MQ=60.00;QD=31.17;SOR=1.022	GT:AD:DP:GQ:PL	1/1:0,12:12:36:388,36,0	4	3.67189	3.09119	0.0790468	0.867644	0.923605	3.77083
d225028	Ib	ReepB	FBgn0033906	1	2R:14172781	0.370968	2R	14172781	A	G	AG	TRUE	124	1217.6	AC=1;AF=0.500;AN=2;BaseQRankSum=4.856;DP=124;ExcessHet=3.0103;FS=5.158;MLEAC=1;MLEAF=0.500;MQ=60.00;MQRankSum=0.000;QD=9.82;ReadPosRankSum=1.357;SOR=1.205	GT:AD:DP:GQ:PL	0/1:78,46:124:99:1225,0,2154	4	8.82339	8.47452	0.973655	7.40431	7.35215	3.77083
d225028	Ib	ReepB	FBgn0033906	1	2R:14172820	0.341085	2R	14172820	A	G	AG	TRUE	129	1211.6	AC=1;AF=0.500;AN=2;BaseQRankSum=6.678;DP=129;ExcessHet=3.0103;FS=3.279;MLEAC=1;MLEAF=0.500;MQ=60.00;MQRankSum=0.000;QD=9.39;ReadPosRankSum=0.217;SOR=1.135	GT:AD:DP:GQ:PL	0/1:85,44:129:99:1219,0,2128	4	8.82339	8.47452	0.973655	7.40431	7.35215	3.77083
d225028	Ib	Diap2	FBgn0015247	-1	2R:15932293	0.25	2R	15932293	T	C	AG	TRUE	12	91.6	AC=1;AF=0.500;AN=2;BaseQRankSum=-0.980;DP=12;ExcessHet=3.0103;FS=6.892;MLEAC=1;MLEAF=0.500;MQ=60.00;MQRankSum=0.000;QD=7.63;ReadPosRankSum=-1.645;SOR=2.815	GT:AD:DP:GQ:PL	0/1:9,3:12:99:99,0,369	4	2.21743	2.14379	0.569937	1.94321	1.78065	3.77083
d225028	Ib	EMC7	FBgn0034066	-1	2R:16016880	0.727273	2R	16016880	T	C	AG	TRUE	33	967.6	AC=1;AF=0.500;AN=2;BaseQRankSum=3.079;DP=33;ExcessHet=3.0103;FS=1.609;MLEAC=1;MLEAF=0.500;MQ=60.00;MQRankSum=0.000;QD=29.32;ReadPosRankSum=-0.833;SOR=1.246	GT:AD:DP:GQ:PL	0/1:9,24:33:99:975,0,507	4	5.21612	4.84046	0.677238	4.60568	4.16897	3.77083
d225028	Ib	EMC7	FBgn0034066	-1	2R:16016882	0.685714	2R	16016882	T	C	AG	TRUE	35	967.6	AC=1;AF=0.500;AN=2;BaseQRankSum=2.154;DP=35;ExcessHet=3.0103;FS=5.480;MLEAC=1;MLEAF=0.500;MQ=60.00;MQRankSum=0.000;QD=27.65;ReadPosRankSum=0.125;SOR=1.459	GT:AD:DP:GQ:PL	0/1:11,24:35:99:975,0,507	4	5.21612	4.84046	0.677238	4.60568	4.16897	3.77083
d225028	Ib	mbl	FBgn0265487	1	2R:17377109	0.476923	2R	17377109	A	G	AG	TRUE	65	1156.6	AC=1;AF=0.500;AN=2;BaseQRankSum=0.708;DP=65;ExcessHet=3.0103;FS=19.301;MLEAC=1;MLEAF=0.500;MQ=60.00;MQRankSum=0.000;QD=17.79;ReadPosRankSum=0.257;SOR=2.031	GT:AD:DP:GQ:PL	0/1:34,31:65:99:1164,0,1334	4	7.78883	7.80422	0.853422	4.6302	4.32818	3.77083
d225028	Ib	pAbp	FBgn0265297	1	2R:18146333	0.555556	2R	18146333	A	G	AG	TRUE	81	1294.6	AC=1;AF=0.500;AN=2;BaseQRankSum=2.931;DP=81;ExcessHet=3.0103;FS=10.089;MLEAC=1;MLEAF=0.500;MQ=60.00;MQRankSum=0.000;QD=15.98;ReadPosRankSum=-0.691;SOR=0.146	GT:AD:DP:GQ:PL	0/1:36,45:81:99:1302,0,898	4	8.63626	8.36071	0.0632563	6.39335	6.25444	3.77083
d225028	Ib	CG30116	FBgn0028496	-1	2R:18457250	0.797101	2R	18457250	T	C	AG	TRUE	69	1762.6	AC=1;AF=0.500;AN=2;BaseQRankSum=3.846;DP=69;ExcessHet=3.0103;FS=6.324;MLEAC=1;MLEAF=0.500;MQ=60.00;MQRankSum=0.000;QD=25.54;ReadPosRankSum=-0.226;SOR=0.692	GT:AD:DP:GQ:PL	0/1:14,55:69:99:1770,0,218	4	2.05783	0.888285	0.000330328	0.132941	0.0831169	3.77083
d225028	Ib	RpL29	FBgn0016726	1	2R:21294403	0.166667	2R	21294403	A	G	AG	TRUE	31	77.6	AC=1;AF=0.500;AN=2;BaseQRankSum=1.759;DP=31;ExcessHet=3.0103;FS=0.000;MLEAC=1;MLEAF=0.500;MQ=60.00;MQRankSum=0.000;QD=2.59;ReadPosRankSum=0.000;SOR=1.051	GT:AD:DP:GQ:PL	0/1:25,5:30:85:85,0,699	4	12.3462	12.3569	0.918117	12.1177	11.882	3.77083
d225028	Ib	CG2765	FBgn0035087	-1	2R:24961078	1	2R	24961078	T	C	AG	TRUE	19	648.03	AC=2;AF=1.00;AN=2;DP=19;ExcessHet=3.0103;FS=0.000;MLEAC=2;MLEAF=1.00;MQ=60.00;QD=34.11;SOR=1.022	GT:AD:DP:GQ:PL	1/1:0,19:19:57:662,57,0	4	2.80939	3.30576	0.862088	1.20241	1.24671	3.77083
d225028	Ib	CG14591	FBgn0033054	-1	2R:6037128	0.965517	2R	6037128	T	C	AG	TRUE	29	934.03	AC=2;AF=1.00;AN=2;BaseQRankSum=1.289;DP=29;ExcessHet=3.0103;FS=0.000;MLEAC=2;MLEAF=1.00;MQ=60.00;MQRankSum=0.000;QD=32.21;ReadPosRankSum=1.141;SOR=0.356	GT:AD:DP:GQ:PL	1/1:1,28:29:54:948,54,0	4	4.47495	4.49171	0.904654	0.132465	0.0680559	3.77083
d225028	Ib	Vha16-1	FBgn0262736	-1	2R:6626171	0.268657	2R	6626171	T	C	AG	TRUE	134	996.6	AC=1;AF=0.500;AN=2;BaseQRankSum=4.642;DP=134;ExcessHet=3.0103;FS=4.890;MLEAC=1;MLEAF=0.500;MQ=60.00;MQRankSum=0.000;QD=7.44;ReadPosRankSum=-2.503;SOR=1.189	GT:AD:DP:GQ:PL	0/1:98,36:134:99:1004,0,2724	4	8.42356	8.78145	0.297901	6.11325	6.08202	3.77083
d225028	Ib	puml	FBgn0033226	1	2R:7813863	1	2R	7813863	A	G	AG	TRUE	11	355.02	AC=2;AF=1.00;AN=2;DP=11;ExcessHet=3.0103;FS=0.000;MLEAC=2;MLEAF=1.00;MQ=60.00;QD=32.27;SOR=1.270	GT:AD:DP:GQ:PL	1/1:0,11:11:33:369,33,0	4	2.96619	2.88029	0.815089	2.94272	2.98054	3.77083
d225028	Ib	prel	FBgn0033413	1	2R:9425652	0.166667	2R	9425652	A	G	AG	TRUE	30	69.6	AC=1;AF=0.500;AN=2;BaseQRankSum=1.001;DP=30;ExcessHet=3.0103;FS=0.000;MLEAC=1;MLEAF=0.500;MQ=60.00;MQRankSum=0.000;QD=2.32;ReadPosRankSum=0.419;SOR=0.929	GT:AD:DP:GQ:PL	0/1:25,5:30:77:77,0,692	4	2.28608	1.30232	0.0580219	1.30797	1.26214	3.77083
d225028	Ib	CG12929	FBgn0033429	-1	2R:9586676	0.421053	2R	9586676	T	C	AG	TRUE	38	374.6	AC=1;AF=0.500;AN=2;BaseQRankSum=0.138;DP=38;ExcessHet=3.0103;FS=4.913;MLEAC=1;MLEAF=0.500;MQ=60.00;MQRankSum=0.000;QD=9.86;ReadPosRankSum=0.000;SOR=0.235	GT:AD:DP:GQ:PL	0/1:22,16:38:99:382,0,463	4	2.88183	3.13243	0.97428	1.637	2.05958	3.77083
d225028	Ib	hzg	FBgn0036556	-1	3L:15993527	1	3L	15993527	T	C	AG	TRUE	22	695.03	AC=2;AF=1.00;AN=2;DP=22;ExcessHet=3.0103;FS=0.000;MLEAC=2;MLEAF=1.00;MQ=60.00;QD=31.59;SOR=1.085	GT:AD:DP:GQ:PL	1/1:0,22:22:65:709,65,0	4	5.14397	4.93394	0.384067	2.83095	2.66627	3.77083
d225028	Ib	Shab	FBgn0262593	1	3L:2941216	0.733333	3L	2941216	A	G	AG	TRUE	15	351.6	AC=1;AF=0.500;AN=2;BaseQRankSum=2.058;DP=15;ExcessHet=3.0103;FS=0.000;MLEAC=1;MLEAF=0.500;MQ=60.00;MQRankSum=0.000;QD=23.44;ReadPosRankSum=0.657;SOR=0.818	GT:AD:DP:GQ:PL	0/1:4,11:15:76:359,0,76	4	3.60169	2.82872	0.0568977	0.796233	0.656306	3.77083
d225028	Ib	Shab	FBgn0262593	1	3L:2941364	0.965517	3L	2941364	A	G	AG	TRUE	29	861.03	AC=2;AF=1.00;AN=2;BaseQRankSum=0.493;DP=29;ExcessHet=3.0103;FS=0.000;MLEAC=2;MLEAF=1.00;MQ=60.00;MQRankSum=0.000;QD=29.69;ReadPosRankSum=-0.482;SOR=0.223	GT:AD:DP:GQ:PL	1/1:1,28:29:52:875,52,0	4	3.60169	2.82872	0.0568977	0.796233	0.656306	3.77083
d225028	Ib	Shab	FBgn0262593	1	3L:2941425	0.7	3L	2941425	A	G	AG	TRUE	30	637.6	AC=1;AF=0.500;AN=2;BaseQRankSum=3.258;DP=30;ExcessHet=3.0103;FS=13.084;MLEAC=1;MLEAF=0.500;MQ=60.00;MQRankSum=0.000;QD=21.25;ReadPosRankSum=1.431;SOR=3.461	GT:AD:DP:GQ:PL	0/1:9,21:30:99:645,0,219	4	3.60169	2.82872	0.0568977	0.796233	0.656306	3.77083
d225028	Ib	Shab	FBgn0262593	1	3L:2941426	0.966667	3L	2941426	A	G	AG	TRUE	30	1182.03	AC=2;AF=1.00;AN=2;BaseQRankSum=0.363;DP=30;ExcessHet=3.0103;FS=6.990;MLEAC=2;MLEAF=1.00;MQ=60.00;MQRankSum=0.000;QD=23.97;ReadPosRankSum=0.638;SOR=2.869	GT:AD:DP:GQ:PL	1/1:1,29:30:57:1196,57,0	4	3.60169	2.82872	0.0568977	0.796233	0.656306	3.77083
d225028	Ib	nAChRbeta1	FBgn0000038	1	3L:4429963	1	3L	4429963	A	G	AG	TRUE	16	572.03	AC=2;AF=1.00;AN=2;DP=16;ExcessHet=3.0103;FS=0.000;MLEAC=2;MLEAF=1.00;MQ=60.00;QD=29.64;SOR=1.244	GT:AD:DP:GQ:PL	1/1:0,16:16:48:586,48,0	4	6.35534	5.5438	0.188032	0.118617	0.0901246	3.77083
d225028	Ib	EndoA	FBgn0038659	1	3R:18907652	0.702703	3R	18907652	A	G	AG	TRUE	37	663.6	AC=1;AF=0.500;AN=2;BaseQRankSum=0.526;DP=37;ExcessHet=3.0103;FS=1.378;MLEAC=1;MLEAF=0.500;MQ=60.00;MQRankSum=0.000;QD=17.94;ReadPosRankSum=1.817;SOR=0.726	GT:AD:DP:GQ:PL	0/1:11,26:37:99:671,0,248	4	4.7728	5.29408	0.154643	0.85352	0.843628	3.77083
d225028	Ib	EndoA	FBgn0038659	1	3R:18907675	0.121212	3R	18907675	A	G	AG	TRUE	34	40.6	AC=1;AF=0.500;AN=2;BaseQRankSum=3.334;DP=34;ExcessHet=3.0103;FS=2.165;MLEAC=1;MLEAF=0.500;MQ=60.00;MQRankSum=0.000;QD=1.23;ReadPosRankSum=0.525;SOR=1.508	GT:AD:DP:GQ:PL	0/1:29,4:33:48:48,0,827	4	4.7728	5.29408	0.154643	0.85352	0.843628	3.77083
d225028	Ib	EndoA	FBgn0038659	1	3R:18909164	0.857143	3R	18909164	A	G	AG	TRUE	14	370.61	AC=1;AF=0.500;AN=2;BaseQRankSum=1.619;DP=14;ExcessHet=3.0103;FS=0.000;MLEAC=1;MLEAF=0.500;MQ=60.00;MQRankSum=0.000;QD=26.47;ReadPosRankSum=2.114;SOR=0.307	GT:AD:DP:GQ:PL	0/1:2,12:14:20:378,0,20	4	4.7728	5.29408	0.154643	0.85352	0.843628	3.77083
d225028	Ib	EndoA	FBgn0038659	1	3R:18910153	1	3R	18910153	A	G	AG	TRUE	21	719.03	AC=2;AF=1.00;AN=2;DP=21;ExcessHet=3.0103;FS=0.000;MLEAC=2;MLEAF=1.00;MQ=60.00;QD=34.24;SOR=2.636	GT:AD:DP:GQ:PL	1/1:0,21:21:63:733,63,0	4	4.7728	5.29408	0.154643	0.85352	0.843628	3.77083
d225028	Ib	Cow	FBgn0039054	-1	3R:23112549	0.607843	3R	23112549	T	C	AG	TRUE	51	948.6	AC=1;AF=0.500;AN=2;BaseQRankSum=3.877;DP=51;ExcessHet=3.0103;FS=4.116;MLEAC=1;MLEAF=0.500;MQ=60.00;MQRankSum=0.000;QD=18.60;ReadPosRankSum=1.202;SOR=1.119	GT:AD:DP:GQ:PL	0/1:20,31:51:99:956,0,516	4	6.07048	6.14794	0.757327	0.0371922	0.0664222	3.77083
d225028	Ib	ATPsynCF6	FBgn0016119	-1	3R:23355357	0.570093	3R	23355357	T	C	AG	TRUE	107	1667.6	AC=1;AF=0.500;AN=2;BaseQRankSum=1.981;DP=107;ExcessHet=3.0103;FS=1.925;MLEAC=1;MLEAF=0.500;MQ=60.00;MQRankSum=0.000;QD=15.59;ReadPosRankSum=0.396;SOR=0.468	GT:AD:DP:GQ:PL	0/1:46,61:107:99:1675,0,1112	4	9.01907	8.99728	0.563116	8.34196	8.52202	3.77083
d225028	Ib	Sec13	FBgn0024509	1	3R:23357683	1	3R	23357683	A	G	AG	TRUE	26	898.03	AC=2;AF=1.00;AN=2;DP=26;ExcessHet=3.0103;FS=0.000;MLEAC=2;MLEAF=1.00;MQ=60.00;QD=34.54;SOR=1.220	GT:AD:DP:GQ:PL	1/1:0,26:26:78:912,78,0	4	3.99691	3.71929	0.929505	3.0338	3.04866	3.77083
d225028	Ib	Rpt5	FBgn0028684	1	3R:23754573	0.142857	3R	23754573	A	G	AG	TRUE	28	121.6	AC=1;AF=0.500;AN=2;BaseQRankSum=0.314;DP=28;ExcessHet=3.0103;FS=4.177;MLEAC=1;MLEAF=0.500;MQ=60.00;MQRankSum=0.000;QD=4.34;ReadPosRankSum=0.000;SOR=0.066	GT:AD:DP:GQ:PL	0/1:24,4:28:99:129,0,1475	4	5.93216	6.10852	0.925004	5.71526	5.18509	3.77083
d225028	Ib	slo	FBgn0003429	1	3R:24707423	1	3R	24707423	A	G	AG	TRUE	33	1142.03	AC=2;AF=1.00;AN=2;DP=33;ExcessHet=3.0103;FS=0.000;MLEAC=2;MLEAF=1.00;MQ=60.00;QD=34.61;SOR=1.981	GT:AD:DP:GQ:PL	1/1:0,33:33:99:1156,99,0	4	3.31874	4.49559	0.310436	1.1716	0.687207	3.77083
d225028	Ib	slo	FBgn0003429	1	3R:24708329	0.384615	3R	24708329	A	G	AG	TRUE	26	364.6	AC=1;AF=0.500;AN=2;BaseQRankSum=4.298;DP=26;ExcessHet=3.0103;FS=12.740;MLEAC=1;MLEAF=0.500;MQ=60.00;MQRankSum=0.000;QD=14.02;ReadPosRankSum=0.401;SOR=3.912	GT:AD:DP:GQ:PL	0/1:16,10:26:99:372,0,665	4	3.31874	4.49559	0.310436	1.1716	0.687207	3.77083
d225028	Ib	slo	FBgn0003429	1	3R:24708356	0.6875	3R	24708356	A	G	AG	TRUE	16	338.6	AC=1;AF=0.500;AN=2;BaseQRankSum=2.686;DP=16;ExcessHet=3.0103;FS=15.911;MLEAC=1;MLEAF=0.500;MQ=60.00;MQRankSum=0.000;QD=21.16;ReadPosRankSum=2.463;SOR=1.627	GT:AD:DP:GQ:PL	0/1:5,11:16:99:346,0,104	4	3.31874	4.49559	0.310436	1.1716	0.687207	3.77083
d225028	Ib	Ald1	FBgn0000064	-1	3R:26254245	0.474265	3R	26254245	T	C	AG	TRUE	272	3570.6	AC=1;AF=0.500;AN=2;BaseQRankSum=5.021;DP=272;ExcessHet=3.0103;FS=10.750;MLEAC=1;MLEAF=0.500;MQ=60.00;MQRankSum=0.000;QD=13.13;ReadPosRankSum=2.279;SOR=0.335	GT:AD:DP:GQ:PL	0/1:143,129:272:99:3578,0,3786	4	11.4026	10.0568	0.0414265	10.8637	11.1339	3.77083
d225028	Ib	Ald1	FBgn0000064	-1	3R:26254381	0.442197	3R	26254381	T	C	AG	TRUE	346	4740.6	AC=1;AF=0.500;AN=2;BaseQRankSum=9.571;DP=346;ExcessHet=3.0103;FS=7.416;MLEAC=1;MLEAF=0.500;MQ=60.00;MQRankSum=0.000;QD=13.70;ReadPosRankSum=-1.128;SOR=1.054	GT:AD:DP:GQ:PL	0/1:193,153:346:99:4748,0,5249	4	11.4026	10.0568	0.0414265	10.8637	11.1339	3.77083
d225028	Ib	Hmu	FBgn0015737	1	3R:27290230	0.657143	3R	27290230	A	G	AG	TRUE	70	1389.6	AC=1;AF=0.500;AN=2;BaseQRankSum=4.676;DP=70;ExcessHet=3.0103;FS=0.964;MLEAC=1;MLEAF=0.500;MQ=60.00;MQRankSum=0.000;QD=19.85;ReadPosRankSum=-0.758;SOR=0.492	GT:AD:DP:GQ:PL	0/1:24,46:70:99:1397,0,514	4	5.87173	5.77395	0.390105	2.59234	2.73469	3.77083
d225028	Ib	Gp93	FBgn0039562	1	3R:27951705	0.917647	3R	27951705	A	G	AG	TRUE	85	3298.6	AC=1;AF=0.500;AN=2;BaseQRankSum=3.279;DP=85;ExcessHet=3.0103;FS=6.091;MLEAC=1;MLEAF=0.500;MQ=60.00;MQRankSum=0.000;QD=30.65;ReadPosRankSum=0.281;SOR=0.556	GT:AD:DP:GQ:PL	0/1:7,78:85:53:3306,0,53	4	5.46458	5.53278	0.962357	2.74479	2.53149	3.77083
d225028	Ib	kay	FBgn0001297	1	3R:29792043	0.661972	3R	29792043	A	G	AG	TRUE	71	1757.6	AC=1;AF=0.500;AN=2;BaseQRankSum=5.032;DP=71;ExcessHet=3.0103;FS=5.061;MLEAC=1;MLEAF=0.500;MQ=60.00;MQRankSum=0.000;QD=24.75;ReadPosRankSum=-0.098;SOR=0.266	GT:AD:DP:GQ:PL	0/1:24,47:71:99:1765,0,738	4	5.08707	5.90756	0.125239	4.66592	4.33526	3.77083
d225028	Ib	kay	FBgn0001297	1	3R:29794088	1	3R	29794088	A	G	AG	TRUE	28	918.03	AC=2;AF=1.00;AN=2;DP=28;ExcessHet=3.0103;FS=0.000;MLEAC=2;MLEAF=1.00;MQ=60.00;QD=32.79;SOR=5.283	GT:AD:DP:GQ:PL	1/1:0,28:28:84:932,84,0	4	5.08707	5.90756	0.125239	4.66592	4.33526	3.77083
d225028	Ib	Drice	FBgn0019972	1	3R:29800350	1	3R	29800350	A	G	AG	TRUE	14	425.03	AC=2;AF=1.00;AN=2;DP=14;ExcessHet=3.0103;FS=0.000;MLEAC=2;MLEAF=1.00;MQ=60.00;QD=30.36;SOR=0.693	GT:AD:DP:GQ:PL	1/1:0,14:14:42:439,42,0	4	3.00994	3.58233	0.417715	2.92448	2.78377	3.77083
d225028	Ib	Etfb	FBgn0039697	-1	3R:29801970	0.263158	3R	29801970	T	C	AG	TRUE	38	219.6	AC=1;AF=0.500;AN=2;BaseQRankSum=1.891;DP=38;ExcessHet=3.0103;FS=1.496;MLEAC=1;MLEAF=0.500;MQ=60.00;MQRankSum=0.000;QD=5.78;ReadPosRankSum=1.259;SOR=1.206	GT:AD:DP:GQ:PL	0/1:28,10:38:99:227,0,769	4	3.23977	2.84256	0.833576	4.60934	4.72143	3.77083
d225028	Ib	VhaAC45RP	FBgn0051030	-1	3R:30165949	0.8125	3R	30165949	T	C	AG	TRUE	64	1950.6	AC=1;AF=0.500;AN=2;BaseQRankSum=1.555;DP=64;ExcessHet=3.0103;FS=4.536;MLEAC=1;MLEAF=0.500;MQ=60.00;MQRankSum=0.000;QD=30.48;ReadPosRankSum=-2.654;SOR=0.867	GT:AD:DP:GQ:PL	0/1:12,52:64:99:1958,0,316	4	6.3392	6.42463	0.721484	0.410326	0.49666	3.77083
d225028	Ib	VhaAC45RP	FBgn0051030	-1	3R:30166167	0.878788	3R	30166167	T	C	AG	TRUE	66	2354.6	AC=1;AF=0.500;AN=2;BaseQRankSum=3.319;DP=66;ExcessHet=3.0103;FS=3.332;MLEAC=1;MLEAF=0.500;MQ=60.00;MQRankSum=0.000;QD=28.51;ReadPosRankSum=-1.744;SOR=0.307	GT:AD:DP:GQ:PL	0/1:8,58:66:99:2362,0,156	4	6.3392	6.42463	0.721484	0.410326	0.49666	3.77083
d225028	Ib	VhaAC45RP	FBgn0051030	-1	3R:30166215	0.901408	3R	30166215	T	C	AG	TRUE	71	1899.8	AC=2;AF=1.00;AN=2;BaseQRankSum=1.570;DP=71;ExcessHet=3.0103;FS=1.607;MLEAC=1;MLEAF=0.500;MQ=60.00;MQRankSum=0.000;QD=26.76;ReadPosRankSum=0.619;SOR=1.175	GT:AD:DP:GQ:PL	1/1:7,64:71:9:1913,9,0	4	6.3392	6.42463	0.721484	0.410326	0.49666	3.77083
d225028	Ib	heca	FBgn0010113	1	3R:30371906	0.439024	3R	30371906	A	G	AG	TRUE	41	497.6	AC=1;AF=0.500;AN=2;BaseQRankSum=3.604;DP=41;ExcessHet=3.0103;FS=2.807;MLEAC=1;MLEAF=0.500;MQ=60.00;MQRankSum=0.000;QD=12.14;ReadPosRankSum=0.803;SOR=1.371	GT:AD:DP:GQ:PL	0/1:23,18:41:99:505,0,520	4	3.65717	4.55384	0.0179205	1.24003	1.45922	3.77083
d225028	Ib	cindr	FBgn0027598	1	3R:30826946	0.214286	3R	30826946	A	G	AG	TRUE	14	64.6	AC=1;AF=0.500;AN=2;BaseQRankSum=2.545;DP=14;ExcessHet=3.0103;FS=0.000;MLEAC=1;MLEAF=0.500;MQ=60.00;MQRankSum=0.000;QD=4.61;ReadPosRankSum=0.937;SOR=0.892	GT:AD:DP:GQ:PL	0/1:11,3:14:72:72,0,295	4	3.79459	4.09584	0.742166	2.21586	2.35913	3.77083
d225028	Ib	mRpL32	FBgn0039835	1	3R:31253063	0.184211	3R	31253063	A	G	AG	TRUE	38	138.6	AC=1;AF=0.500;AN=2;BaseQRankSum=4.070;DP=38;ExcessHet=3.0103;FS=7.841;MLEAC=1;MLEAF=0.500;MQ=60.00;MQRankSum=0.000;QD=3.65;SOR=2.572	GT:AD:DP:GQ:PL	0/1:31,7:38:99:146,0,911	4	2.49773	3.27599	0.876728	1.35927	1.34085	3.77083
d225028	Ib	CycG	FBgn0039858	-1	3R:31601551	0.242424	3R	31601551	T	C	AG	TRUE	33	181.6	AC=1;AF=0.500;AN=2;BaseQRankSum=2.893;DP=33;ExcessHet=3.0103;FS=0.000;MLEAC=1;MLEAF=0.500;MQ=60.00;MQRankSum=0.000;QD=5.50;ReadPosRankSum=0.631;SOR=0.892	GT:AD:DP:GQ:PL	0/1:25,8:33:99:189,0,709	4	6.749	7.09638	0.463947	5.43584	5.80647	3.77083
d225028	Ib	CycG	FBgn0039858	-1	3R:31601718	0.375	3R	31601718	T	C	AG	TRUE	32	323.6	AC=1;AF=0.500;AN=2;BaseQRankSum=4.056;DP=32;ExcessHet=3.0103;FS=0.000;MLEAC=1;MLEAF=0.500;MQ=60.00;MQRankSum=0.000;QD=10.11;ReadPosRankSum=-0.452;SOR=0.527	GT:AD:DP:GQ:PL	0/1:20,12:32:99:331,0,536	4	6.749	7.09638	0.463947	5.43584	5.80647	3.77083
d225028	Ib	awd	FBgn0000150	-1	3R:31745955	0.529412	3R	31745955	T	C	AG	TRUE	19	161.6	AC=1;AF=0.500;AN=2;BaseQRankSum=-0.193;DP=19;ExcessHet=3.0103;FS=3.274;MLEAC=1;MLEAF=0.500;MQ=60.00;MQRankSum=0.000;QD=9.51;SOR=0.084	GT:AD:DP:GQ:PL	0/1:8,9:17:99:169,0,335	4	11.4307	11.3852	0.780141	9.45494	9.86209	3.77083
d225028	Ib	cpx	FBgn0041605	1	3R:4297504	0.420168	3R	4297504	A	G	AG	TRUE	119	1300.6	AC=1;AF=0.500;AN=2;BaseQRankSum=4.634;DP=119;ExcessHet=3.0103;FS=3.748;MLEAC=1;MLEAF=0.500;MQ=60.00;MQRankSum=0.000;QD=10.93;ReadPosRankSum=-0.793;SOR=1.233	GT:AD:DP:GQ:PL	0/1:69,50:119:99:1308,0,1994	4	7.90852	7.29727	0.637321	0.177459	0.228242	3.77083
d225028	Ib	cpx	FBgn0041605	1	3R:4297517	0.118812	3R	4297517	A	G	AG	TRUE	202	183.6	AC=1;AF=0.500;AN=2;BaseQRankSum=4.563;DP=202;ExcessHet=3.0103;FS=5.527;MLEAC=1;MLEAF=0.500;MQ=60.00;MQRankSum=0.000;QD=0.91;ReadPosRankSum=-0.214;SOR=0.258	GT:AD:DP:GQ:PL	0/1:178,24:202:99:191,0,7376	4	7.90852	7.29727	0.637321	0.177459	0.228242	3.77083
d225028	Ib	cpx	FBgn0041605	1	3R:4297518	0.180488	3R	4297518	A	G	AG	TRUE	205	912.6	AC=1;AF=0.500;AN=2;BaseQRankSum=4.335;DP=205;ExcessHet=3.0103;FS=5.873;MLEAC=1;MLEAF=0.500;MQ=60.00;MQRankSum=0.000;QD=4.45;ReadPosRankSum=0.099;SOR=0.299	GT:AD:DP:GQ:PL	0/1:168,37:205:99:920,0,5170	4	7.90852	7.29727	0.637321	0.177459	0.228242	3.77083
d225028	Ib	cpx	FBgn0041605	1	3R:4301150	0.241379	3R	4301150	A	G	AG	TRUE	29	158.6	AC=1;AF=0.500;AN=2;BaseQRankSum=3.377;DP=29;ExcessHet=3.0103;FS=0.000;MLEAC=1;MLEAF=0.500;MQ=60.00;MQRankSum=0.000;QD=5.47;ReadPosRankSum=0.971;SOR=0.368	GT:AD:DP:GQ:PL	0/1:22,7:29:99:166,0,622	4	7.90852	7.29727	0.637321	0.177459	0.228242	3.77083
d225028	Ib	CG1090	FBgn0037238	1	3R:4365385	1	3R	4365385	A	G	AG	TRUE	29	972.03	AC=2;AF=1.00;AN=2;DP=29;ExcessHet=3.0103;FS=0.000;MLEAC=2;MLEAF=1.00;MQ=60.00;QD=33.52;SOR=0.906	GT:AD:DP:GQ:PL	1/1:0,29:29:87:986,87,0	4	4.19836	3.59903	0.876728	0.070259	0.0808403	3.77083
d225028	Ib	CG9727	FBgn0037445	-1	3R:6455990	0.846154	3R	6455990	T	C	AG	TRUE	13	329.6	AC=1;AF=0.500;AN=2;BaseQRankSum=1.017;DP=13;ExcessHet=3.0103;FS=0.000;MLEAC=1;MLEAF=0.500;MQ=60.00;MQRankSum=0.000;QD=25.35;ReadPosRankSum=-1.089;SOR=0.859	GT:AD:DP:GQ:PL	0/1:2,11:13:30:337,0,30	4	2.14065	1.48485	0.171049	0.851658	0.906101	3.77083
d225028	Ib	beag	FBgn0037660	-1	3R:9063537	0.428571	3R	9063537	T	C	AG	TRUE	28	448.6	AC=1;AF=0.500;AN=2;BaseQRankSum=2.390;DP=28;ExcessHet=3.0103;FS=9.467;MLEAC=1;MLEAF=0.500;MQ=60.00;MQRankSum=0.000;QD=16.02;ReadPosRankSum=-1.913;SOR=3.258	GT:AD:DP:GQ:PL	0/1:16,12:28:99:456,0,1984	4	1.54635	1.3782	0.945538	1.39988	1.21946	3.77083
d225028	Ib	Sh	FBgn0003380	-1	X:17926624	0.157895	X	17926624	T	C	AG	TRUE	19	44.6	AC=1;AF=0.500;AN=2;BaseQRankSum=2.642;DP=19;ExcessHet=3.0103;FS=0.000;MLEAC=1;MLEAF=0.500;MQ=60.00;MQRankSum=0.000;QD=2.35;ReadPosRankSum=-1.748;SOR=0.892	GT:AD:DP:GQ:PL	0/1:16,3:19:52:52,0,466	4	5.78478	5.98037	0.885151	2.25586	1.88036	3.77083
d225028	Ib	Sh	FBgn0003380	-1	X:17950057	0.285714	X	17950057	T	C	AG	TRUE	28	182.6	AC=1;AF=0.500;AN=2;BaseQRankSum=1.974;DP=28;ExcessHet=3.0103;FS=1.730;MLEAC=1;MLEAF=0.500;MQ=60.00;MQRankSum=0.000;QD=6.52;ReadPosRankSum=-0.280;SOR=0.283	GT:AD:DP:GQ:PL	0/1:20,8:28:99:190,0,591	4	5.78478	5.98037	0.885151	2.25586	1.88036	3.77083
d225028	Ib	Frq1	FBgn0030897	1	X:18170126	0.19598	X	18170126	A	G	AG	TRUE	199	949.6	AC=1;AF=0.500;AN=2;BaseQRankSum=3.451;DP=199;ExcessHet=3.0103;FS=5.138;MLEAC=1;MLEAF=0.500;MQ=60.00;MQRankSum=0.000;QD=4.77;ReadPosRankSum=0.752;SOR=1.214	GT:AD:DP:GQ:PL	0/1:160,39:199:99:957,0,4701	4	6.87486	6.93852	0.801616	0.138615	0.135627	3.77083
d225028	Ib	Naa15-16	FBgn0031020	1	X:19483997	0.25	X	19483997	A	G	AG	TRUE	20	115.6	AC=1;AF=0.500;AN=2;BaseQRankSum=2.535;DP=20;ExcessHet=3.0103;FS=0.000;MLEAC=1;MLEAF=0.500;MQ=60.00;MQRankSum=0.000;QD=5.78;ReadPosRankSum=0.438;SOR=1.051	GT:AD:DP:GQ:PL	0/1:15,5:20:99:123,0,397	4	1.95719	2.3857	0.703725	0.814629	0.878925	3.77083
d225028	Ib	DIP1	FBgn0024807	-1	X:21629725	0.454545	X	21629725	T	C	AG	TRUE	22	240.6	AC=1;AF=0.500;AN=2;BaseQRankSum=1.326;DP=22;ExcessHet=3.0103;FS=0.000;MLEAC=1;MLEAF=0.500;MQ=60.00;MQRankSum=0.000;QD=10.94;ReadPosRankSum=0.793;SOR=0.473	GT:AD:DP:GQ:PL	0/1:12,10:22:99:248,0,458	4	4.22571	4.66995	0.917906	1.90808	1.68313	3.77083
d225028	Ib	DIP1	FBgn0024807	-1	X:21629726	0.545455	X	21629726	T	C	AG	TRUE	22	280.6	AC=1;AF=0.500;AN=2;BaseQRankSum=0.689;DP=22;ExcessHet=3.0103;FS=0.000;MLEAC=1;MLEAF=0.500;MQ=60.00;MQRankSum=0.000;QD=12.75;ReadPosRankSum=-0.760;SOR=0.976	GT:AD:DP:GQ:PL	0/1:10,12:22:99:288,0,384	4	4.22571	4.66995	0.917906	1.90808	1.68313	3.77083
d225028	Ib	Vap33	FBgn0029687	1	X:3953478	0.12	X	3953478	A	G	AG	TRUE	125	77.6	AC=1;AF=0.500;AN=2;BaseQRankSum=-1.949;DP=125;ExcessHet=3.0103;FS=11.199;MLEAC=1;MLEAF=0.500;MQ=60.00;MQRankSum=0.000;QD=0.62;ReadPosRankSum=0.286;SOR=0.046	GT:AD:DP:GQ:PL	0/1:110,15:125:85:85,0,3389	4	6.63427	6.82411	0.460294	4.36447	3.97039	3.77083
d225028	Ib	OtopLa	FBgn0259994	-1	X:5631035	0.333333	X	5631035	T	C	AG	TRUE	27	223.6	AC=1;AF=0.500;AN=2;BaseQRankSum=0.215;DP=27;ExcessHet=3.0103;FS=0.000;MLEAC=1;MLEAF=0.500;MQ=60.00;MQRankSum=0.000;QD=8.28;ReadPosRankSum=0.000;SOR=0.892	GT:AD:DP:GQ:PL	0/1:18,9:27:99:231,0,836	4	4.25873	3.80584	0.230532	0.129723	0.050683	3.77083
d225028	Ib	OtopLa	FBgn0259994	-1	X:5631048	0.552632	X	5631048	T	C	AG	TRUE	38	688.6	AC=1;AF=0.500;AN=2;BaseQRankSum=2.369;DP=38;ExcessHet=3.0103;FS=7.216;MLEAC=1;MLEAF=0.500;MQ=60.00;MQRankSum=0.000;QD=18.12;ReadPosRankSum=0.547;SOR=1.397	GT:AD:DP:GQ:PL	0/1:17,21:38:99:696,0,376	4	4.25873	3.80584	0.230532	0.129723	0.050683	3.77083
d225028	Ib	CG15771	FBgn0029801	1	X:5759154	0.227273	X	5759154	A	G	AG	TRUE	22	91.6	AC=1;AF=0.500;AN=2;BaseQRankSum=-2.519;DP=22;ExcessHet=3.0103;FS=5.378;MLEAC=1;MLEAF=0.500;MQ=60.00;MQRankSum=0.000;QD=4.16;ReadPosRankSum=-1.296;SOR=2.160	GT:AD:DP:GQ:PL	0/1:17,5:22:99:99,0,506	4	2.77403	1.38228	0.00798382	0.981371	1.0088	3.77083
d225029	Ib	CG33303	FBgn0053303	-1	2L:10374727	1	2L	10374727	T	C	AG	TRUE	23	762.03	AC=2;AF=1.00;AN=2;DP=23;ExcessHet=3.0103;FS=0.000;MLEAC=2;MLEAF=1.00;MQ=60.00;QD=33.13;SOR=2.030	GT:AD:DP:GQ:PL	1/1:0,23:23:69:776,69,0	4	4.82255	3.93282	0.505552	2.43097	2.84372	5.55305
d225029	Ib	CG33303	FBgn0053303	-1	2L:10374859	1	2L	10374859	T	C	AG	TRUE	13	455.02	AC=2;AF=1.00;AN=2;DP=13;ExcessHet=3.0103;FS=0.000;MLEAC=2;MLEAF=1.00;MQ=60.00;QD=34.37;SOR=0.836	GT:AD:DP:GQ:PL	1/1:0,13:13:39:469,39,0	4	4.82255	3.93282	0.505552	2.43097	2.84372	5.55305
d225029	Ib	Pex19	FBgn0032407	1	2L:12094295	0.679245	2L	12094295	A	G	AG	TRUE	53	1408.6	AC=1;AF=0.500;AN=2;BaseQRankSum=5.574;DP=53;ExcessHet=3.0103;FS=10.877;MLEAC=1;MLEAF=0.500;MQ=60.00;MQRankSum=0.000;QD=26.58;ReadPosRankSum=-0.794;SOR=0.120	GT:AD:DP:GQ:PL	0/1:17,36:53:99:1416,0,867	4	5.52679	4.58011	0.198542	3.35329	3.35545	5.55305
d225029	Ib	CG16974	FBgn0032479	-1	2L:13189312	0.918919	2L	13189312	T	C	AG	TRUE	37	1019.28	AC=2;AF=1.00;AN=2;BaseQRankSum=0.283;DP=37;ExcessHet=3.0103;FS=2.191;MLEAC=1;MLEAF=0.500;MQ=60.00;MQRankSum=0.000;QD=27.55;ReadPosRankSum=0.418;SOR=0.527	GT:AD:DP:GQ:PL	1/1:3,34:37:6:1031,6,0	4	3.8107	3.63081	0.755289	1.61977	1.51626	5.55305
d225029	Ib	RpL24	FBgn0032518	-1	2L:13394077	0.25	2L	13394077	T	C	AG	TRUE	20	119.6	AC=1;AF=0.500;AN=2;BaseQRankSum=3.373;DP=20;ExcessHet=3.0103;FS=2.520;MLEAC=1;MLEAF=0.500;MQ=60.00;MQRankSum=0.000;QD=5.98;ReadPosRankSum=1.385;SOR=0.156	GT:AD:DP:GQ:PL	0/1:15,5:20:99:127,0,429	4	11.1577	11.3686	0.00168671	10.7441	10.5771	5.55305
d225029	Ib	nAChRalpha5	FBgn0028875	1	2L:14089204	1	2L	14089204	A	G	AG	TRUE	26	934.03	AC=2;AF=1.00;AN=2;DP=26;ExcessHet=3.0103;FS=0.000;MLEAC=2;MLEAF=1.00;MQ=60.00;QD=31.20;SOR=2.670	GT:AD:DP:GQ:PL	1/1:0,26:26:78:948,78,0	4	2.17311	2.13145	0.632364	0.0571794	0.030452	5.55305
d225029	Ib	nAChRalpha5	FBgn0028875	1	2L:14089221	0.208333	2L	14089221	A	G	AG	TRUE	24	34.6	AC=1;AF=0.500;AN=2;BaseQRankSum=-1.387;DP=24;ExcessHet=3.0103;FS=0.000;MLEAC=1;MLEAF=0.500;MQ=60.00;MQRankSum=0.000;QD=1.44;ReadPosRankSum=-1.177;SOR=0.693	GT:AD:DP:GQ:PL	0/1:19,5:24:42:42,0,564	4	2.17311	2.13145	0.632364	0.0571794	0.030452	5.55305
d225029	Ib	nAChRalpha5	FBgn0028875	1	2L:14089246	1	2L	14089246	A	G	AG	TRUE	16	695.03	AC=2;AF=1.00;AN=2;DP=16;ExcessHet=3.0103;FS=0.000;MLEAC=2;MLEAF=1.00;MQ=60.00;QD=26.87;SOR=1.609	GT:AD:DP:GQ:PL	1/1:0,16:16:48:709,48,0	4	2.17311	2.13145	0.632364	0.0571794	0.030452	5.55305
d225029	Ib	toc	FBgn0015600	-1	2L:3127431	1	2L	3127431	T	C	AG	TRUE	14	430.03	AC=2;AF=1.00;AN=2;DP=14;ExcessHet=3.0103;FS=0.000;MLEAC=2;MLEAF=1.00;MQ=60.00;QD=30.72;SOR=1.329	GT:AD:DP:GQ:PL	1/1:0,14:14:42:444,42,0	4	2.90338	3.0015	0.854332	0.60002	0.848108	5.55305
d225029	Ib	toc	FBgn0015600	-1	2L:3127506	1	2L	3127506	T	C	AG	TRUE	17	562.03	AC=2;AF=1.00;AN=2;DP=17;ExcessHet=3.0103;FS=0.000;MLEAC=2;MLEAF=1.00;MQ=60.00;QD=33.06;SOR=0.804	GT:AD:DP:GQ:PL	1/1:0,17:17:51:576,51,0	4	2.90338	3.0015	0.854332	0.60002	0.848108	5.55305
d225029	Ib	gkt	FBgn0260817	1	2L:3160690	1	2L	3160690	A	G	AG	TRUE	15	637.03	AC=2;AF=1.00;AN=2;DP=15;ExcessHet=3.0103;FS=0.000;MLEAC=2;MLEAF=1.00;MQ=60.00;QD=34.56;SOR=0.818	GT:AD:DP:GQ:PL	1/1:0,15:15:45:651,45,0	4	1.75442	2.16285	0.634118	0.39653	0.732201	5.55305
d225029	Ib	CG9662	FBgn0031529	-1	2L:3375848	1	2L	3375848	T	C	AG	TRUE	15	517.03	AC=2;AF=1.00;AN=2;DP=15;ExcessHet=3.0103;FS=0.000;MLEAC=2;MLEAF=1.00;MQ=60.00;QD=34.47;SOR=5.549	GT:AD:DP:GQ:PL	1/1:0,15:15:45:531,45,0	4	4.79971	4.26303	0.58721	2.25071	2.37554	5.55305
d225029	Ib	Msp300	FBgn0261836	1	2L:5164694	0.210526	2L	5164694	A	G	AG	TRUE	57	167.6	AC=1;AF=0.500;AN=2;BaseQRankSum=0.093;DP=57;ExcessHet=3.0103;FS=0.000;MLEAC=1;MLEAF=0.500;MQ=60.00;MQRankSum=0.000;QD=2.94;ReadPosRankSum=-0.294;SOR=0.754	GT:AD:DP:GQ:PL	0/1:45,12:57:99:175,0,1315	4	5.66863	5.5634	0.880478	3.31906	3.19027	5.55305
d225029	Ib	Nckx30C	FBgn0028704	-1	2L:9717614	0.232558	2L	9717614	T	C	AG	TRUE	43	353.6	AC=1;AF=0.500;AN=2;BaseQRankSum=2.026;DP=43;ExcessHet=3.0103;FS=5.519;MLEAC=1;MLEAF=0.500;MQ=60.00;MQRankSum=0.000;QD=8.22;ReadPosRankSum=0.980;SOR=0.191	GT:AD:DP:GQ:PL	0/1:33,10:43:99:361,0,1629	4	4.99389	4.09503	0.0412382	0.0832012	0.108464	5.55305
d225029	Ib	Nckx30C	FBgn0028704	-1	2L:9733349	1	2L	9733349	T	C	AG	TRUE	19	614.03	AC=2;AF=1.00;AN=2;DP=19;ExcessHet=3.0103;FS=0.000;MLEAC=2;MLEAF=1.00;MQ=60.00;QD=32.32;SOR=0.793	GT:AD:DP:GQ:PL	1/1:0,19:19:57:628,57,0	4	4.99389	4.09503	0.0412382	0.0832012	0.108464	5.55305
d225029	Ib	RNaseZ	FBgn0028426	-1	2R:10307375	0.347826	2R	10307375	T	C	AG	TRUE	23	283.6	AC=1;AF=0.500;AN=2;BaseQRankSum=-1.507;DP=23;ExcessHet=3.0103;FS=2.793;MLEAC=1;MLEAF=0.500;MQ=60.00;MQRankSum=0.000;QD=12.33;ReadPosRankSum=-1.916;SOR=2.160	GT:AD:DP:GQ:PL	0/1:15,8:23:99:291,0,606	4	0.912224	0.704883	0.672113	0.569709	0.392617	5.55305
d225029	Ib	RpS15Ab	FBgn0033555	1	2R:10822309	0.181818	2R	10822309	A	G	AG	TRUE	33	105.6	AC=1;AF=0.500;AN=2;BaseQRankSum=2.055;DP=33;ExcessHet=3.0103;FS=25.668;MLEAC=1;MLEAF=0.500;MQ=60.00;MQRankSum=0.000;QD=3.20;ReadPosRankSum=-0.188;SOR=3.896	GT:AD:DP:GQ:PL	0/1:27,6:33:99:113,0,843	4	3.76529	3.1313	0.134754	5.69163	5.75158	5.55305
d225029	Ib	nclb	FBgn0263510	1	2R:10876649	1	2R	10876649	A	G	AG	TRUE	17	574.03	AC=2;AF=1.00;AN=2;DP=17;ExcessHet=3.0103;FS=0.000;MLEAC=2;MLEAF=1.00;MQ=60.00;QD=33.77;SOR=1.739	GT:AD:DP:GQ:PL	1/1:0,17:17:51:588,51,0	4	2.63709	1.58521	0.250542	0.492658	0.759112	5.55305
d225029	Ib	Drep3	FBgn0028407	1	2R:12062006	1	2R	12062006	A	G	AG	TRUE	38	1277.03	AC=2;AF=1.00;AN=2;DP=38;ExcessHet=3.0103;FS=0.000;MLEAC=2;MLEAF=1.00;MQ=60.00;QD=33.61;SOR=1.493	GT:AD:DP:GQ:PL	1/1:0,38:38:99:1291,114,0	4	3.12174	3.72334	0.5785	0.173035	0.00806535	5.55305
d225029	Ib	GLS	FBgn0261625	-1	2R:12671884	1	2R	12671884	T	C	AG	TRUE	19	648.03	AC=2;AF=1.00;AN=2;DP=19;ExcessHet=3.0103;FS=0.000;MLEAC=2;MLEAF=1.00;MQ=60.00;QD=34.11;SOR=0.793	GT:AD:DP:GQ:PL	1/1:0,19:19:57:662,57,0	4	3.11216	3.49617	0.657215	0.866847	1.01098	5.55305
d225029	Ib	CG3955	FBgn0033793	-1	2R:13128147	0.522388	2R	13128147	T	C	AG	TRUE	67	1036.6	AC=1;AF=0.500;AN=2;BaseQRankSum=3.906;DP=67;ExcessHet=3.0103;FS=0.000;MLEAC=1;MLEAF=0.500;MQ=60.00;MQRankSum=0.000;QD=15.47;ReadPosRankSum=-0.271;SOR=0.678	GT:AD:DP:GQ:PL	0/1:32,35:67:99:1044,0,818	4	4.54626	4.75042	0.982538	0.118374	0.14535	5.55305
d225029	Ib	CG6329	FBgn0033872	1	2R:13832057	0.196078	2R	13832057	A	G	AG	TRUE	51	263.6	AC=1;AF=0.500;AN=2;BaseQRankSum=2.844;DP=51;ExcessHet=3.0103;FS=5.427;MLEAC=1;MLEAF=0.500;MQ=60.00;MQRankSum=0.000;QD=5.17;ReadPosRankSum=-1.143;SOR=1.734	GT:AD:DP:GQ:PL	0/1:41,10:51:99:271,0,2109	4	6.30782	5.19838	0.0246684	0.326178	0.229277	5.55305
d225029	Ib	CG6329	FBgn0033872	1	2R:13832539	0.137255	2R	13832539	A	G	AG	TRUE	51	101.6	AC=1;AF=0.500;AN=2;BaseQRankSum=4.421;DP=51;ExcessHet=3.0103;FS=3.719;MLEAC=1;MLEAF=0.500;MQ=60.00;MQRankSum=0.000;QD=1.99;ReadPosRankSum=0.315;SOR=1.609	GT:AD:DP:GQ:PL	0/1:44,7:51:99:109,0,1178	4	6.30782	5.19838	0.0246684	0.326178	0.229277	5.55305
d225029	Ib	ReepB	FBgn0033906	1	2R:14172781	0.640351	2R	14172781	A	G	AG	TRUE	343	6441.6	AC=1;AF=0.500;AN=2;BaseQRankSum=4.760;DP=343;ExcessHet=3.0103;FS=0.000;MLEAC=1;MLEAF=0.500;MQ=60.00;MQRankSum=0.000;QD=18.84;ReadPosRankSum=-1.082;SOR=0.692	GT:AD:DP:GQ:PL	0/1:123,219:342:99:6449,0,3215	4	8.82339	8.47452	0.973655	7.40431	7.35215	5.55305
d225029	Ib	ReepB	FBgn0033906	1	2R:14172820	0.634868	2R	14172820	A	G	AG	TRUE	304	5829.6	AC=1;AF=0.500;AN=2;BaseQRankSum=8.732;DP=304;ExcessHet=3.0103;FS=2.473;MLEAC=1;MLEAF=0.500;MQ=60.00;MQRankSum=0.000;QD=19.18;ReadPosRankSum=1.089;SOR=0.522	GT:AD:DP:GQ:PL	0/1:111,193:304:99:5837,0,2431	4	8.82339	8.47452	0.973655	7.40431	7.35215	5.55305
d225029	Ib	mRpS16	FBgn0033907	-1	2R:14173081	0.357143	2R	14173081	T	C	AG	TRUE	14	197.6	AC=1;AF=0.500;AN=2;BaseQRankSum=0.572;DP=14;ExcessHet=3.0103;FS=0.000;MLEAC=1;MLEAF=0.500;MQ=60.00;MQRankSum=0.000;QD=14.11;ReadPosRankSum=-1.183;SOR=0.269	GT:AD:DP:GQ:PL	0/1:9,5:14:99:205,0,334	4	2.9769	2.95758	0.828541	2.15934	1.92185	5.55305
d225029	Ib	Ufc1	FBgn0034061	-1	2R:16007210	1	2R	16007210	T	C	AG	TRUE	16	704.03	AC=2;AF=1.00;AN=2;DP=16;ExcessHet=3.0103;FS=0.000;MLEAC=2;MLEAF=1.00;MQ=60.00;QD=31.52;SOR=0.941	GT:AD:DP:GQ:PL	1/1:0,16:16:48:718,48,0	4	3.89671	4.76406	0.198863	4.33244	4.42744	5.55305
d225029	Ib	CG8405	FBgn0034071	1	2R:16048343	0.6	2R	16048343	A	G	AG	TRUE	20	337.6	AC=1;AF=0.500;AN=2;BaseQRankSum=2.534;DP=20;ExcessHet=3.0103;FS=0.000;MLEAC=1;MLEAF=0.500;MQ=60.00;MQRankSum=0.000;QD=16.88;SOR=0.467	GT:AD:DP:GQ:PL	0/1:8,12:20:99:345,0,167	4	2.53302	2.65448	0.692047	1.04381	0.98824	5.55305
d225029	Ib	mbl	FBgn0265487	1	2R:17377109	0.394366	2R	17377109	A	G	AG	TRUE	71	1012.6	AC=1;AF=0.500;AN=2;BaseQRankSum=4.402;DP=71;ExcessHet=3.0103;FS=0.000;MLEAC=1;MLEAF=0.500;MQ=60.00;MQRankSum=0.000;QD=14.26;ReadPosRankSum=0.572;SOR=0.649	GT:AD:DP:GQ:PL	0/1:43,28:71:99:1020,0,1694	4	7.78883	7.80422	0.853422	4.6302	4.32818	5.55305
d225029	Ib	pAbp	FBgn0265297	1	2R:18146333	0.396887	2R	18146333	A	G	AG	TRUE	257	2682.6	AC=1;AF=0.500;AN=2;BaseQRankSum=6.449;DP=257;ExcessHet=3.0103;FS=2.993;MLEAC=1;MLEAF=0.500;MQ=60.00;MQRankSum=0.000;QD=10.44;ReadPosRankSum=-1.152;SOR=0.918	GT:AD:DP:GQ:PL	0/1:155,102:257:99:2690,0,4193	4	8.63626	8.36071	0.0632563	6.39335	6.25444	5.55305
d225029	Ib	CG30116	FBgn0028496	-1	2R:18457250	1	2R	18457250	T	C	AG	TRUE	26	905.03	AC=2;AF=1.00;AN=2;DP=26;ExcessHet=3.0103;FS=0.000;MLEAC=2;MLEAF=1.00;MQ=60.00;QD=34.81;SOR=0.846	GT:AD:DP:GQ:PL	1/1:0,26:26:78:919,78,0	4	2.05783	0.888285	0.000330328	0.132941	0.0831169	5.55305
d225029	Ib	bonsai	FBgn0026261	1	2R:22638356	1	2R	22638356	A	G	AG	TRUE	13	564.02	AC=2;AF=1.00;AN=2;DP=13;ExcessHet=3.0103;FS=0.000;MLEAC=2;MLEAF=1.00;MQ=60.00;QD=25.36;SOR=5.283	GT:AD:DP:GQ:PL	1/1:0,13:13:39:578,39,0	4	2.83839	2.59942	0.957558	1.58577	1.84416	5.55305
d225029	Ib	CG14591	FBgn0033054	-1	2R:6037128	0.561644	2R	6037128	T	C	AG	TRUE	73	1123.6	AC=1;AF=0.500;AN=2;BaseQRankSum=1.205;DP=73;ExcessHet=3.0103;FS=12.658;MLEAC=1;MLEAF=0.500;MQ=60.00;MQRankSum=0.000;QD=15.39;ReadPosRankSum=0.524;SOR=1.811	GT:AD:DP:GQ:PL	0/1:32,41:73:99:1131,0,858	4	4.47495	4.49171	0.904654	0.132465	0.0680559	5.55305
d225029	Ib	Vha16-1	FBgn0262736	-1	2R:6626171	0.25	2R	6626171	T	C	AG	TRUE	60	373.6	AC=1;AF=0.500;AN=2;BaseQRankSum=4.550;DP=60;ExcessHet=3.0103;FS=0.000;MLEAC=1;MLEAF=0.500;MQ=60.00;MQRankSum=0.000;QD=6.23;ReadPosRankSum=-0.693;SOR=0.517	GT:AD:DP:GQ:PL	0/1:45,15:60:99:381,0,1257	4	8.42356	8.78145	0.297901	6.11325	6.08202	5.55305
d225029	Ib	CG14764	FBgn0033236	-1	2R:7954006	1	2R	7954006	T	C	AG	TRUE	13	469.02	AC=2;AF=1.00;AN=2;DP=13;ExcessHet=3.0103;FS=0.000;MLEAC=2;MLEAF=1.00;MQ=60.00;QD=30.94;SOR=1.179	GT:AD:DP:GQ:PL	1/1:0,13:13:39:483,39,0	4	3.63595	4.28822	0.22193	0.652756	0.775469	5.55305
d225029	Ib	CSN4	FBgn0027054	1	2R:7973697	1	2R	7973697	A	G	AG	TRUE	18	589.03	AC=2;AF=1.00;AN=2;DP=18;ExcessHet=3.0103;FS=0.000;MLEAC=2;MLEAF=1.00;MQ=60.00;QD=32.72;SOR=1.863	GT:AD:DP:GQ:PL	1/1:0,18:18:54:603,54,0	4	2.71701	2.92813	0.927838	3.57475	3.3122	5.55305
d225029	Ib	prel	FBgn0033413	1	2R:9425652	0.44	2R	9425652	A	G	AG	TRUE	50	579.6	AC=1;AF=0.500;AN=2;BaseQRankSum=3.025;DP=50;ExcessHet=3.0103;FS=1.234;MLEAC=1;MLEAF=0.500;MQ=60.00;MQRankSum=0.000;QD=11.59;ReadPosRankSum=-0.521;SOR=0.425	GT:AD:DP:GQ:PL	0/1:28,22:50:99:587,0,748	4	2.28608	1.30232	0.0580219	1.30797	1.26214	5.55305
d225029	Ib	CG1902	FBgn0033434	1	2R:9604115	0.78125	2R	9604115	A	G	AG	TRUE	32	777.6	AC=1;AF=0.500;AN=2;BaseQRankSum=3.181;DP=32;ExcessHet=3.0103;FS=1.885;MLEAC=1;MLEAF=0.500;MQ=60.00;MQRankSum=0.000;QD=24.30;ReadPosRankSum=-0.069;SOR=1.528	GT:AD:DP:GQ:PL	0/1:7,25:32:99:785,0,146	4	4.22058	3.69211	0.700445	1.77674	1.66021	5.55305
d225029	Ib	Uba1	FBgn0023143	-1	2R:9688858	0.53012	2R	9688858	T	C	AG	TRUE	83	1241.6	AC=1;AF=0.500;AN=2;BaseQRankSum=4.499;DP=83;ExcessHet=3.0103;FS=5.675;MLEAC=1;MLEAF=0.500;MQ=60.00;MQRankSum=0.000;QD=14.96;ReadPosRankSum=0.032;SOR=0.470	GT:AD:DP:GQ:PL	0/1:39,44:83:99:1249,0,936	4	4.58023	4.88416	0.433921	3.14724	3.06775	5.55305
d225029	Ib	Uba1	FBgn0023143	-1	2R:9689431	1	2R	9689431	T	C	AG	TRUE	42	1360.03	AC=2;AF=1.00;AN=2;DP=42;ExcessHet=3.0103;FS=0.000;MLEAC=2;MLEAF=1.00;MQ=60.00;QD=32.38;SOR=0.693	GT:AD:DP:GQ:PL	1/1:0,42:42:99:1374,125,0	4	4.58023	4.88416	0.433921	3.14724	3.06775	5.55305
d225029	Ib	hzg	FBgn0036556	-1	3L:15993527	1	3L	15993527	T	C	AG	TRUE	58	1823.03	AC=2;AF=1.00;AN=2;DP=58;ExcessHet=3.0103;FS=0.000;MLEAC=2;MLEAF=1.00;MQ=60.00;QD=31.98;SOR=1.238	GT:AD:DP:GQ:PL	1/1:0,57:57:99:1837,169,0	4	5.14397	4.93394	0.384067	2.83095	2.66627	5.55305
d225029	Ib	Csp	FBgn0004179	1	3L:22273143	0.204545	3L	22273143	A	G	AG	TRUE	44	164.6	AC=1;AF=0.500;AN=2;BaseQRankSum=3.720;DP=44;ExcessHet=3.0103;FS=8.706;MLEAC=1;MLEAF=0.500;MQ=60.00;MQRankSum=0.000;QD=3.74;ReadPosRankSum=-1.128;SOR=2.343	GT:AD:DP:GQ:PL	0/1:35,9:44:99:172,0,994	4	5.56152	5.5577	0.972817	1.72477	1.54634	5.55305
d225029	Ib	hth	FBgn0001235	-1	3R:10584920	1	3R	10584920	T	C	AG	TRUE	41	2005.03	AC=2;AF=1.00;AN=2;DP=41;ExcessHet=3.0103;FS=0.000;MLEAC=2;MLEAF=1.00;MQ=60.00;QD=32.66;SOR=1.075	GT:AD:DP:GQ:PL	1/1:0,41:41:99:2019,138,0	4	4.98397	5.64813	0.197441	4.70896	4.59923	5.55305
d225029	Ib	Rbp	FBgn0262483	1	3R:15399446	1	3R	15399446	A	G	AG	TRUE	22	787.03	AC=2;AF=1.00;AN=2;DP=22;ExcessHet=3.0103;FS=0.000;MLEAC=2;MLEAF=1.00;MQ=60.00;QD=27.99;SOR=1.329	GT:AD:DP:GQ:PL	1/1:0,22:22:66:801,66,0	4	4.26678	5.40295	0.000371186	0.0963761	0.0364857	5.55305
d225029	Ib	EndoA	FBgn0038659	1	3R:18909164	0.844828	3R	18909164	A	G	AG	TRUE	58	1570.6	AC=1;AF=0.500;AN=2;BaseQRankSum=3.871;DP=58;ExcessHet=3.0103;FS=0.000;MLEAC=1;MLEAF=0.500;MQ=60.00;MQRankSum=0.000;QD=27.08;ReadPosRankSum=0.452;SOR=0.741	GT:AD:DP:GQ:PL	0/1:9,49:58:99:1578,0,118	4	4.7728	5.29408	0.154643	0.85352	0.843628	5.55305
d225029	Ib	EndoA	FBgn0038659	1	3R:18910153	1	3R	18910153	A	G	AG	TRUE	31	1033.03	AC=2;AF=1.00;AN=2;DP=31;ExcessHet=3.0103;FS=0.000;MLEAC=2;MLEAF=1.00;MQ=60.00;QD=33.32;SOR=2.694	GT:AD:DP:GQ:PL	1/1:0,31:31:93:1047,93,0	4	4.7728	5.29408	0.154643	0.85352	0.843628	5.55305
d225029	Ib	Xrp1	FBgn0261113	1	3R:18918354	0.15	3R	18918354	A	G	AG	TRUE	20	40.6	AC=1;AF=0.500;AN=2;BaseQRankSum=1.932;DP=20;ExcessHet=3.0103;FS=0.000;MLEAC=1;MLEAF=0.500;MQ=60.00;MQRankSum=0.000;QD=2.03;ReadPosRankSum=1.384;SOR=0.392	GT:AD:DP:GQ:PL	0/1:17,3:20:48:48,0,487	4	6.93525	6.63308	0.99582	5.49922	5.49918	5.55305
d225029	Ib	vib	FBgn0267975	-1	3R:19226523	0.684211	3R	19226523	T	C	AG	TRUE	19	407.6	AC=1;AF=0.500;AN=2;BaseQRankSum=2.906;DP=19;ExcessHet=3.0103;FS=0.000;MLEAC=1;MLEAF=0.500;MQ=60.00;MQRankSum=0.000;QD=21.45;ReadPosRankSum=0.485;SOR=0.385	GT:AD:DP:GQ:PL	0/1:6,13:19:99:415,0,106	4	5.02601	5.14846	0.946513	3.41525	3.2449	5.55305
d225029	Ib	Cow	FBgn0039054	-1	3R:23112549	0.52	3R	23112549	T	C	AG	TRUE	25	354.6	AC=1;AF=0.500;AN=2;BaseQRankSum=2.262;DP=25;ExcessHet=3.0103;FS=0.000;MLEAC=1;MLEAF=0.500;MQ=60.00;MQRankSum=0.000;QD=14.18;ReadPosRankSum=-0.740;SOR=0.818	GT:AD:DP:GQ:PL	0/1:12,13:25:99:362,0,302	4	6.07048	6.14794	0.757327	0.0371922	0.0664222	5.55305
d225029	Ib	orb	FBgn0004882	-1	3R:23260888	1	3R	23260888	T	C	AG	TRUE	30	1328.03	AC=2;AF=1.00;AN=2;DP=30;ExcessHet=3.0103;FS=0.000;MLEAC=2;MLEAF=1.00;MQ=60.00;QD=32.04;SOR=2.019	GT:AD:DP:GQ:PL	1/1:0,30:30:90:1342,90,0	4	0.895835	1.72468	0.157527	0.0284633	0.0256318	5.55305
d225029	Ib	ATPsynCF6	FBgn0016119	-1	3R:23355357	0.703297	3R	23355357	T	C	AG	TRUE	91	1921.6	AC=1;AF=0.500;AN=2;BaseQRankSum=4.153;DP=91;ExcessHet=3.0103;FS=4.068;MLEAC=1;MLEAF=0.500;MQ=60.00;MQRankSum=0.000;QD=21.12;ReadPosRankSum=-0.429;SOR=1.371	GT:AD:DP:GQ:PL	0/1:27,64:91:99:1929,0,554	4	9.01907	8.99728	0.563116	8.34196	8.52202	5.55305
d225029	Ib	Gdh	FBgn0001098	-1	3R:23936205	0.554622	3R	23936205	T	C	AG	TRUE	119	2023.6	AC=1;AF=0.500;AN=2;BaseQRankSum=7.939;DP=119;ExcessHet=3.0103;FS=4.760;MLEAC=1;MLEAF=0.500;MQ=60.00;MQRankSum=0.000;QD=17.01;ReadPosRankSum=0.988;SOR=1.171	GT:AD:DP:GQ:PL	0/1:53,66:119:99:2031,0,1339	4	6.73636	5.26871	0.00814535	4.37474	4.57326	5.55305
d225029	Ib	CG31140	FBgn0051140	1	3R:23976395	0.428571	3R	23976395	A	G	AG	TRUE	28	273.6	AC=1;AF=0.500;AN=2;BaseQRankSum=0.384;DP=28;ExcessHet=3.0103;FS=6.029;MLEAC=1;MLEAF=0.500;MQ=60.00;MQRankSum=0.000;QD=9.77;ReadPosRankSum=0.284;SOR=0.707	GT:AD:DP:GQ:PL	0/1:16,12:28:99:281,0,404	4	5.33289	5.77175	0.887479	1.38007	1.01442	5.55305
d225029	Ib	eIF4EHP	FBgn0053100	-1	3R:24106936	1	3R	24106936	T	C	AG	TRUE	20	695.03	AC=2;AF=1.00;AN=2;DP=20;ExcessHet=3.0103;FS=0.000;MLEAC=2;MLEAF=1.00;MQ=60.00;QD=34.75;SOR=0.892	GT:AD:DP:GQ:PL	1/1:0,20:20:60:709,60,0	4	4.76318	5.05264	0.385496	1.71244	1.40936	5.55305
d225029	Ib	slo	FBgn0003429	1	3R:24675663	1	3R	24675663	A	G	AG	TRUE	24	838.03	AC=2;AF=1.00;AN=2;DP=24;ExcessHet=3.0103;FS=0.000;MLEAC=2;MLEAF=1.00;MQ=60.00;QD=34.92;SOR=2.925	GT:AD:DP:GQ:PL	1/1:0,24:24:72:852,72,0	4	3.31874	4.49559	0.310436	1.1716	0.687207	5.55305
d225029	Ib	Ald1	FBgn0000064	-1	3R:26254245	0.478495	3R	26254245	T	C	AG	TRUE	188	2355.6	AC=1;AF=0.500;AN=2;BaseQRankSum=4.456;DP=188;ExcessHet=3.0103;FS=12.301;MLEAC=1;MLEAF=0.500;MQ=60.00;MQRankSum=0.000;QD=12.66;ReadPosRankSum=-0.635;SOR=1.480	GT:AD:DP:GQ:PL	0/1:97,89:186:99:2363,0,2687	4	11.4026	10.0568	0.0414265	10.8637	11.1339	5.55305
d225029	Ib	Ald1	FBgn0000064	-1	3R:26254381	0.49789	3R	26254381	T	C	AG	TRUE	237	3671.6	AC=1;AF=0.500;AN=2;BaseQRankSum=7.574;DP=237;ExcessHet=3.0103;FS=14.300;MLEAC=1;MLEAF=0.500;MQ=60.00;MQRankSum=0.000;QD=15.49;ReadPosRankSum=1.201;SOR=0.486	GT:AD:DP:GQ:PL	0/1:119,118:237:99:3679,0,3329	4	11.4026	10.0568	0.0414265	10.8637	11.1339	5.55305
d225029	Ib	Gp93	FBgn0039562	1	3R:27951705	0.6	3R	27951705	A	G	AG	TRUE	55	1389.6	AC=1;AF=0.500;AN=2;BaseQRankSum=2.030;DP=55;ExcessHet=3.0103;FS=2.422;MLEAC=1;MLEAF=0.500;MQ=60.00;MQRankSum=0.000;QD=25.27;ReadPosRankSum=-0.121;SOR=0.368	GT:AD:DP:GQ:PL	0/1:22,33:55:99:1397,0,806	4	5.46458	5.53278	0.962357	2.74479	2.53149	5.55305
d225029	Ib	jus	FBgn0039647	-1	3R:29172906	0.92	3R	29172906	T	C	AG	TRUE	25	952.6	AC=1;AF=0.500;AN=2;BaseQRankSum=-1.854;DP=25;ExcessHet=3.0103;FS=8.050;MLEAC=1;MLEAF=0.500;MQ=60.00;MQRankSum=0.000;QD=31.32;ReadPosRankSum=-0.522;SOR=4.892	GT:AD:DP:GQ:PL	0/1:2,23:25:99:960,0,285	4	5.26612	7.39983	8.31329e-16	0.167237	0.158941	5.55305
d225029	Ib	kay	FBgn0001297	1	3R:29794088	0.728395	3R	29794088	A	G	AG	TRUE	81	1757.6	AC=1;AF=0.500;AN=2;BaseQRankSum=2.722;DP=81;ExcessHet=3.0103;FS=0.000;MLEAC=1;MLEAF=0.500;MQ=60.00;MQRankSum=0.000;QD=21.70;ReadPosRankSum=1.235;SOR=0.534	GT:AD:DP:GQ:PL	0/1:22,59:81:99:1765,0,521	4	5.08707	5.90756	0.125239	4.66592	4.33526	5.55305
d225029	Ib	RpS8	FBgn0039713	1	3R:29863650	0.324675	3R	29863650	A	G	AG	TRUE	77	622.6	AC=1;AF=0.500;AN=2;BaseQRankSum=1.176;DP=77;ExcessHet=3.0103;FS=7.721;MLEAC=1;MLEAF=0.500;MQ=60.00;MQRankSum=0.000;QD=8.09;ReadPosRankSum=2.261;SOR=2.772	GT:AD:DP:GQ:PL	0/1:52,25:77:99:630,0,1588	4	12.4079	12.3182	0.473228	11.7965	11.7074	5.55305
d225029	Ib	VhaAC45RP	FBgn0051030	-1	3R:30165949	0.56	3R	30165949	T	C	AG	TRUE	50	1085.6	AC=1;AF=0.500;AN=2;BaseQRankSum=2.457;DP=50;ExcessHet=3.0103;FS=9.011;MLEAC=1;MLEAF=0.500;MQ=60.00;MQRankSum=0.000;QD=21.71;ReadPosRankSum=-0.441;SOR=2.167	GT:AD:DP:GQ:PL	0/1:22,28:50:99:1093,0,783	4	6.3392	6.42463	0.721484	0.410326	0.49666	5.55305
d225029	Ib	VhaAC45RP	FBgn0051030	-1	3R:30166167	1	3R	30166167	T	C	AG	TRUE	21	910.03	AC=2;AF=1.00;AN=2;DP=21;ExcessHet=3.0103;FS=0.000;MLEAC=2;MLEAF=1.00;MQ=60.00;QD=25.07;SOR=0.784	GT:AD:DP:GQ:PL	1/1:0,21:21:63:924,63,0	4	6.3392	6.42463	0.721484	0.410326	0.49666	5.55305
d225029	Ib	VhaAC45RP	FBgn0051030	-1	3R:30166215	1	3R	30166215	T	C	AG	TRUE	19	656.03	AC=2;AF=1.00;AN=2;DP=19;ExcessHet=3.0103;FS=0.000;MLEAC=2;MLEAF=1.00;MQ=60.00;QD=34.53;SOR=0.793	GT:AD:DP:GQ:PL	1/1:0,19:19:57:670,57,0	4	6.3392	6.42463	0.721484	0.410326	0.49666	5.55305
d225029	Ib	heca	FBgn0010113	1	3R:30371906	0.705882	3R	30371906	A	G	AG	TRUE	51	1063.6	AC=1;AF=0.500;AN=2;BaseQRankSum=1.985;DP=51;ExcessHet=3.0103;FS=0.000;MLEAC=1;MLEAF=0.500;MQ=60.00;MQRankSum=0.000;QD=20.85;ReadPosRankSum=-1.460;SOR=0.596	GT:AD:DP:GQ:PL	0/1:15,36:51:99:1071,0,334	4	3.65717	4.55384	0.0179205	1.24003	1.45922	5.55305
d225029	Ib	awd	FBgn0000150	-1	3R:31745955	0.916667	3R	31745955	T	C	AG	TRUE	15	262.49	AC=2;AF=1.00;AN=2;BaseQRankSum=0.776;DP=15;ExcessHet=3.0103;FS=0.000;MLEAC=1;MLEAF=0.500;MQ=60.00;MQRankSum=0.000;QD=21.87;ReadPosRankSum=-0.146;SOR=0.477	GT:AD:DP:GQ:PL	1/1:1,11:12:10:276,10,0	4	11.4307	11.3852	0.780141	9.45494	9.86209	5.55305
d225029	Ib	cpx	FBgn0041605	1	3R:4297504	0.322917	3R	4297504	A	G	AG	TRUE	96	703.6	AC=1;AF=0.500;AN=2;BaseQRankSum=3.855;DP=96;ExcessHet=3.0103;FS=3.060;MLEAC=1;MLEAF=0.500;MQ=60.00;MQRankSum=0.000;QD=7.33;ReadPosRankSum=-1.044;SOR=1.406	GT:AD:DP:GQ:PL	0/1:65,31:96:99:711,0,1906	4	7.90852	7.29727	0.637321	0.177459	0.228242	5.55305
d225029	Ib	cpx	FBgn0041605	1	3R:4297518	0.113772	3R	4297518	A	G	AG	TRUE	167	128.6	AC=1;AF=0.500;AN=2;BaseQRankSum=2.839;DP=167;ExcessHet=3.0103;FS=3.158;MLEAC=1;MLEAF=0.500;MQ=60.00;MQRankSum=0.000;QD=0.77;ReadPosRankSum=-0.056;SOR=0.240	GT:AD:DP:GQ:PL	0/1:148,19:167:99:136,0,4395	4	7.90852	7.29727	0.637321	0.177459	0.228242	5.55305
d225029	Ib	cpx	FBgn0041605	1	3R:4301150	0.181818	3R	4301150	A	G	AG	TRUE	99	496.6	AC=1;AF=0.500;AN=2;BaseQRankSum=3.987;DP=99;ExcessHet=3.0103;FS=14.321;MLEAC=1;MLEAF=0.500;MQ=60.00;MQRankSum=0.000;QD=5.02;ReadPosRankSum=-0.541;SOR=0.084	GT:AD:DP:GQ:PL	0/1:81,18:99:99:504,0,3240	4	7.90852	7.29727	0.637321	0.177459	0.228242	5.55305
d225029	Ib	cpx	FBgn0041605	1	3R:4301158	0.319149	3R	4301158	A	G	AG	TRUE	94	1064.6	AC=1;AF=0.500;AN=2;BaseQRankSum=7.185;DP=94;ExcessHet=3.0103;FS=0.975;MLEAC=1;MLEAF=0.500;MQ=60.00;MQRankSum=0.000;QD=11.33;ReadPosRankSum=0.394;SOR=0.512	GT:AD:DP:GQ:PL	0/1:64,30:94:99:1072,0,2159	4	7.90852	7.29727	0.637321	0.177459	0.228242	5.55305
d225029	Ib	cpx	FBgn0041605	1	3R:4301244	0.320988	3R	4301244	A	G	AG	TRUE	81	912.6	AC=1;AF=0.500;AN=2;BaseQRankSum=5.031;DP=81;ExcessHet=3.0103;FS=8.445;MLEAC=1;MLEAF=0.500;MQ=60.00;MQRankSum=0.000;QD=11.27;ReadPosRankSum=0.776;SOR=0.215	GT:AD:DP:GQ:PL	0/1:55,26:81:99:920,0,2303	4	7.90852	7.29727	0.637321	0.177459	0.228242	5.55305
d225029	Ib	cpx	FBgn0041605	1	3R:4301246	0.329114	3R	4301246	A	G	AG	TRUE	79	904.6	AC=1;AF=0.500;AN=2;BaseQRankSum=5.254;DP=79;ExcessHet=3.0103;FS=6.730;MLEAC=1;MLEAF=0.500;MQ=60.00;MQRankSum=0.000;QD=11.45;ReadPosRankSum=0.021;SOR=0.236	GT:AD:DP:GQ:PL	0/1:53,26:79:99:912,0,2720	4	7.90852	7.29727	0.637321	0.177459	0.228242	5.55305
d225029	Ib	cpx	FBgn0041605	1	3R:4301258	0.242105	3R	4301258	A	G	AG	TRUE	95	730.6	AC=1;AF=0.500;AN=2;BaseQRankSum=4.666;DP=95;ExcessHet=3.0103;FS=16.334;MLEAC=1;MLEAF=0.500;MQ=60.00;MQRankSum=0.000;QD=7.69;ReadPosRankSum=1.482;SOR=0.085	GT:AD:DP:GQ:PL	0/1:72,23:95:99:738,0,2731	4	7.90852	7.29727	0.637321	0.177459	0.228242	5.55305
d225029	Ib	CG1090	FBgn0037238	1	3R:4365385	1	3R	4365385	A	G	AG	TRUE	18	783.03	AC=2;AF=1.00;AN=2;DP=18;ExcessHet=3.0103;FS=0.000;MLEAC=2;MLEAF=1.00;MQ=60.00;QD=33.30;SOR=1.863	GT:AD:DP:GQ:PL	1/1:0,18:18:54:797,54,0	4	4.19836	3.59903	0.876728	0.070259	0.0808403	5.55305
d225029	Ib	CG9727	FBgn0037445	-1	3R:6455990	1	3R	6455990	T	C	AG	TRUE	44	1491.03	AC=2;AF=1.00;AN=2;DP=44;ExcessHet=3.0103;FS=0.000;MLEAC=2;MLEAF=1.00;MQ=60.00;QD=33.89;SOR=0.693	GT:AD:DP:GQ:PL	1/1:0,44:44:99:1505,131,0	4	2.14065	1.48485	0.171049	0.851658	0.906101	5.55305
d225029	Ib	cac	FBgn0263111	-1	X:11971853	0.923077	X	11971853	T	C	AG	TRUE	13	403.02	AC=2;AF=1.00;AN=2;BaseQRankSum=1.784;DP=13;ExcessHet=3.0103;FS=3.358;MLEAC=2;MLEAF=1.00;MQ=60.00;MQRankSum=0.000;QD=31.00;ReadPosRankSum=-0.563;SOR=0.707	GT:AD:DP:GQ:PL	1/1:1,12:13:29:417,29,0	4	4.16093	4.30898	0.905929	0.0597302	0.0545455	5.55305
d225029	Ib	cac	FBgn0263111	-1	X:11977538	1	X	11977538	T	C	AG	TRUE	37	1223.03	AC=2;AF=1.00;AN=2;DP=37;ExcessHet=3.0103;FS=0.000;MLEAC=2;MLEAF=1.00;MQ=60.00;QD=33.05;SOR=0.859	GT:AD:DP:GQ:PL	1/1:0,37:37:99:1237,110,0	4	4.16093	4.30898	0.905929	0.0597302	0.0545455	5.55305
d225029	Ib	Frq1	FBgn0030897	1	X:18170126	0.172185	X	18170126	A	G	AG	TRUE	151	416.6	AC=1;AF=0.500;AN=2;BaseQRankSum=3.638;DP=151;ExcessHet=3.0103;FS=11.970;MLEAC=1;MLEAF=0.500;MQ=60.00;MQRankSum=0.000;QD=2.76;ReadPosRankSum=-0.188;SOR=2.057	GT:AD:DP:GQ:PL	0/1:125,26:151:99:424,0,3643	4	6.87486	6.93852	0.801616	0.138615	0.135627	5.55305
d225029	Ib	DIP1	FBgn0024807	-1	X:21629725	0.538462	X	21629725	T	C	AG	TRUE	39	779.6	AC=1;AF=0.500;AN=2;BaseQRankSum=-1.003;DP=39;ExcessHet=3.0103;FS=0.000;MLEAC=1;MLEAF=0.500;MQ=60.00;MQRankSum=0.000;QD=19.99;ReadPosRankSum=0.155;SOR=0.586	GT:AD:DP:GQ:PL	0/1:18,21:39:99:787,0,581	4	4.22571	4.66995	0.917906	1.90808	1.68313	5.55305
d225029	Ib	DIP1	FBgn0024807	-1	X:21629726	0.358974	X	21629726	T	C	AG	TRUE	39	526.6	AC=1;AF=0.500;AN=2;BaseQRankSum=2.320;DP=39;ExcessHet=3.0103;FS=0.000;MLEAC=1;MLEAF=0.500;MQ=60.00;MQRankSum=0.000;QD=13.50;ReadPosRankSum=0.191;SOR=0.886	GT:AD:DP:GQ:PL	0/1:25,14:39:99:534,0,1108	4	4.22571	4.66995	0.917906	1.90808	1.68313	5.55305
d225029	Ib	DIP1	FBgn0024807	-1	X:21629727	0.25641	X	21629727	T	C	AG	TRUE	39	257.6	AC=1;AF=0.500;AN=2;BaseQRankSum=4.441;DP=39;ExcessHet=3.0103;FS=0.000;MLEAC=1;MLEAF=0.500;MQ=60.00;MQRankSum=0.000;QD=6.61;ReadPosRankSum=-1.224;SOR=0.518	GT:AD:DP:GQ:PL	0/1:29,10:39:99:265,0,1102	4	4.22571	4.66995	0.917906	1.90808	1.68313	5.55305
d225029	Ib	DIP1	FBgn0024807	-1	X:21629737	0.34375	X	21629737	T	C	AG	TRUE	32	391.6	AC=1;AF=0.500;AN=2;BaseQRankSum=2.051;DP=32;ExcessHet=3.0103;FS=1.475;MLEAC=1;MLEAF=0.500;MQ=60.00;MQRankSum=0.000;QD=12.24;ReadPosRankSum=-0.617;SOR=1.148	GT:AD:DP:GQ:PL	0/1:21,11:32:99:399,0,932	4	4.22571	4.66995	0.917906	1.90808	1.68313	5.55305
d225029	Ib	Vap33	FBgn0029687	1	X:3953264	0.150943	X	3953264	A	G	AG	TRUE	53	126.6	AC=1;AF=0.500;AN=2;BaseQRankSum=4.329;DP=53;ExcessHet=3.0103;FS=3.852;MLEAC=1;MLEAF=0.500;MQ=60.00;MQRankSum=0.000;QD=2.39;ReadPosRankSum=0.723;SOR=1.814	GT:AD:DP:GQ:PL	0/1:45,8:53:99:134,0,1706	4	6.63427	6.82411	0.460294	4.36447	3.97039	5.55305
d225029	Ib	CG15771	FBgn0029801	1	X:5759154	0.258065	X	5759154	A	G	AG	TRUE	62	292.6	AC=1;AF=0.500;AN=2;BaseQRankSum=-3.861;DP=62;ExcessHet=3.0103;FS=13.970;MLEAC=1;MLEAF=0.500;MQ=60.00;MQRankSum=0.000;QD=4.72;ReadPosRankSum=-2.349;SOR=2.584	GT:AD:DP:GQ:PL	0/1:46,16:62:99:300,0,1319	4	2.77403	1.38228	0.00798382	0.981371	1.0088	5.55305
d225030	Ib	CG33303	FBgn0053303	-1	2L:10374727	0.376623	2L	10374727	T	C	AG	TRUE	77	768.6	AC=1;AF=0.500;AN=2;BaseQRankSum=1.916;DP=77;ExcessHet=3.0103;FS=2.157;MLEAC=1;MLEAF=0.500;MQ=60.00;MQRankSum=0.000;QD=9.98;ReadPosRankSum=-1.397;SOR=0.405	GT:AD:DP:GQ:PL	0/1:48,29:77:99:776,0,1352	4	4.82255	3.93282	0.505552	2.43097	2.84372	0
d225030	Ib	CG33303	FBgn0053303	-1	2L:10374859	0.426471	2L	10374859	T	C	AG	TRUE	69	791.6	AC=1;AF=0.500;AN=2;BaseQRankSum=5.081;DP=69;ExcessHet=3.0103;FS=0.000;MLEAC=1;MLEAF=0.500;MQ=60.00;MQRankSum=0.000;QD=11.64;ReadPosRankSum=-1.183;SOR=0.715	GT:AD:DP:GQ:PL	0/1:39,29:68:99:799,0,983	4	4.82255	3.93282	0.505552	2.43097	2.84372	0
d225030	Ib	Pex19	FBgn0032407	1	2L:12094295	0.267857	2L	12094295	A	G	AG	TRUE	56	456.6	AC=1;AF=0.500;AN=2;BaseQRankSum=2.730;DP=56;ExcessHet=3.0103;FS=0.000;MLEAC=1;MLEAF=0.500;MQ=60.00;MQRankSum=0.000;QD=8.15;ReadPosRankSum=0.270;SOR=0.584	GT:AD:DP:GQ:PL	0/1:41,15:56:99:464,0,1787	4	5.52679	4.58011	0.198542	3.35329	3.35545	0
d225030	Ib	CG16974	FBgn0032479	-1	2L:13189312	0.652174	2L	13189312	T	C	AG	TRUE	46	939.6	AC=1;AF=0.500;AN=2;BaseQRankSum=3.671;DP=46;ExcessHet=3.0103;FS=2.689;MLEAC=1;MLEAF=0.500;MQ=60.00;MQRankSum=0.000;QD=20.43;ReadPosRankSum=1.644;SOR=0.340	GT:AD:DP:GQ:PL	0/1:16,30:46:99:947,0,393	4	3.8107	3.63081	0.755289	1.61977	1.51626	0
d225030	Ib	RpL24	FBgn0032518	-1	2L:13394077	1	2L	13394077	T	C	AG	TRUE	17	607.03	AC=2;AF=1.00;AN=2;DP=17;ExcessHet=3.0103;FS=0.000;MLEAC=2;MLEAF=1.00;MQ=60.00;QD=31.11;SOR=2.179	GT:AD:DP:GQ:PL	1/1:0,17:17:51:621,51,0	4	11.1577	11.3686	0.00168671	10.7441	10.5771	0
d225030	Ib	chinmo	FBgn0086758	1	2L:1697095	0.647059	2L	1697095	A	G	AG	TRUE	68	1305.6	AC=1;AF=0.500;AN=2;BaseQRankSum=3.417;DP=68;ExcessHet=3.0103;FS=5.253;MLEAC=1;MLEAF=0.500;MQ=60.00;MQRankSum=0.000;QD=19.20;ReadPosRankSum=-0.418;SOR=1.420	GT:AD:DP:GQ:PL	0/1:24,44:68:99:1313,0,632	4	4.89124	3.28942	2.254e-05	2.01378	1.91915	0
d225030	Ib	ND-B14.5B	FBgn0031505	-1	2L:3145125	1	2L	3145125	T	C	AG	TRUE	60	2332.03	AC=2;AF=1.00;AN=2;DP=60;ExcessHet=3.0103;FS=0.000;MLEAC=2;MLEAF=1.00;MQ=60.00;QD=35.72;SOR=5.960	GT:AD:DP:GQ:PL	1/1:0,60:60:99:2346,180,0	4	7.10814	6.50114	0.981134	7.02897	7.05689	0
d225030	Ib	Hydr2	FBgn0014906	1	2L:3167771	1	2L	3167771	A	G	AG	TRUE	40	1354.03	AC=2;AF=1.00;AN=2;DP=40;ExcessHet=3.0103;FS=0.000;MLEAC=2;MLEAF=1.00;MQ=60.00;QD=33.85;SOR=1.788	GT:AD:DP:GQ:PL	1/1:0,40:40:99:1368,119,0	4	2.47882	1.81392	0.0606409	0.927258	1.49242	0
d225030	Ib	GramD1B	FBgn0085423	-1	2L:3358929	0.794118	2L	3358929	T	C	AG	TRUE	34	762.6	AC=1;AF=0.500;AN=2;BaseQRankSum=1.395;DP=34;ExcessHet=3.0103;FS=0.000;MLEAC=1;MLEAF=0.500;MQ=60.00;MQRankSum=0.000;QD=22.43;ReadPosRankSum=-0.128;SOR=1.002	GT:AD:DP:GQ:PL	0/1:7,27:34:99:770,0,128	4	1.42535	1.38029	0.93415	0.581157	0.778327	0
d225030	Ib	CG9662	FBgn0031529	-1	2L:3375848	1	2L	3375848	T	C	AG	TRUE	37	1429.03	AC=2;AF=1.00;AN=2;DP=37;ExcessHet=3.0103;FS=0.000;MLEAC=2;MLEAF=1.00;MQ=60.00;QD=31.48;SOR=4.977	GT:AD:DP:GQ:PL	1/1:0,37:37:99:1443,111,0	4	4.79971	4.26303	0.58721	2.25071	2.37554	0
d225030	Ib	nrv2	FBgn0015777	-1	2L:6789976	0.566116	2L	6789976	T	C	AG	TRUE	242	4640.6	AC=1;AF=0.500;AN=2;BaseQRankSum=10.483;DP=242;ExcessHet=3.0103;FS=0.000;MLEAC=1;MLEAF=0.500;MQ=60.00;MQRankSum=0.000;QD=19.18;ReadPosRankSum=-2.711;SOR=0.675	GT:AD:DP:GQ:PL	0/1:105,137:242:99:4648,0,3606	4	3.48474	2.11119	0.017969	1.38147	1.80436	0
d225030	Ib	RNaseZ	FBgn0028426	-1	2R:10307375	0.666667	2R	10307375	T	C	AG	TRUE	60	1606.6	AC=1;AF=0.500;AN=2;BaseQRankSum=-3.686;DP=60;ExcessHet=3.0103;FS=36.974;MLEAC=1;MLEAF=0.500;MQ=60.00;MQRankSum=0.000;QD=26.78;ReadPosRankSum=-1.805;SOR=6.310	GT:AD:DP:GQ:PL	0/1:20,40:60:99:1614,0,750	4	0.912224	0.704883	0.672113	0.569709	0.392617	0
d225030	Ib	RpS15Ab	FBgn0033555	1	2R:10822309	0.4	2R	10822309	A	G	AG	TRUE	60	673.6	AC=1;AF=0.500;AN=2;BaseQRankSum=0.736;DP=60;ExcessHet=3.0103;FS=107.920;MLEAC=1;MLEAF=0.500;MQ=60.00;MQRankSum=0.000;QD=11.23;ReadPosRankSum=-1.383;SOR=4.970	GT:AD:DP:GQ:PL	0/1:36,24:60:99:681,0,981	4	3.76529	3.1313	0.134754	5.69163	5.75158	0
d225030	Ib	nclb	FBgn0263510	1	2R:10876649	0.426966	2R	10876649	A	G	AG	TRUE	89	1044.6	AC=1;AF=0.500;AN=2;BaseQRankSum=6.262;DP=89;ExcessHet=3.0103;FS=1.973;MLEAC=1;MLEAF=0.500;MQ=60.00;MQRankSum=0.000;QD=11.74;ReadPosRankSum=0.682;SOR=0.442	GT:AD:DP:GQ:PL	0/1:51,38:89:99:1052,0,1214	4	2.63709	1.58521	0.250542	0.492658	0.759112	0
d225030	Ib	CG12942	FBgn0033569	1	2R:10897181	0.217391	2R	10897181	A	G	AG	TRUE	23	110.6	AC=1;AF=0.500;AN=2;BaseQRankSum=3.463;DP=23;ExcessHet=3.0103;FS=0.000;MLEAC=1;MLEAF=0.500;MQ=60.00;MQRankSum=0.000;QD=4.81;ReadPosRankSum=-0.113;SOR=0.095	GT:AD:DP:GQ:PL	0/1:18,5:23:99:118,0,657	4	0.399958	0.555292	0.715167	0.384429	0.464199	0
d225030	Ib	TpnC47D	FBgn0010423	-1	2R:11274765	0.263158	2R	11274765	T	C	AG	TRUE	57	282.6	AC=1;AF=0.500;AN=2;BaseQRankSum=0.229;DP=57;ExcessHet=3.0103;FS=6.224;MLEAC=1;MLEAF=0.500;MQ=60.00;MQRankSum=0.000;QD=4.96;ReadPosRankSum=3.113;SOR=1.609	GT:AD:DP:GQ:PL	0/1:42,15:57:99:290,0,1448	4	4.33191	4.62442	0.748454	7.82426	8.77231	0
d225030	Ib	bbc	FBgn0033844	-1	2R:13486995	0.375	2R	13486995	T	C	AG	TRUE	16	137.6	AC=1;AF=0.500;AN=2;BaseQRankSum=0.501;DP=16;ExcessHet=3.0103;FS=5.237;MLEAC=1;MLEAF=0.500;MQ=60.00;MQRankSum=0.000;QD=8.60;ReadPosRankSum=1.859;SOR=0.105	GT:AD:DP:GQ:PL	0/1:10,6:16:99:145,0,279	4	2.43079	2.35712	0.725008	1.06293	1.18129	0
d225030	Ib	bbc	FBgn0033844	-1	2R:13487558	0.310345	2R	13487558	T	C	AG	TRUE	29	184.6	AC=1;AF=0.500;AN=2;BaseQRankSum=1.048;DP=29;ExcessHet=3.0103;FS=0.000;MLEAC=1;MLEAF=0.500;MQ=60.00;MQRankSum=0.000;QD=6.37;ReadPosRankSum=-2.012;SOR=0.892	GT:AD:DP:GQ:PL	0/1:20,9:29:99:192,0,582	4	2.43079	2.35712	0.725008	1.06293	1.18129	0
d225030	Ib	bbc	FBgn0033844	-1	2R:13494406	1	2R	13494406	T	C	AG	TRUE	30	1068.03	AC=2;AF=1.00;AN=2;DP=30;ExcessHet=3.0103;FS=0.000;MLEAC=2;MLEAF=1.00;MQ=60.00;QD=35.32;SOR=1.143	GT:AD:DP:GQ:PL	1/1:0,30:30:90:1082,90,0	4	2.43079	2.35712	0.725008	1.06293	1.18129	0
d225030	Ib	ReepB	FBgn0033906	1	2R:14172781	0.545946	2R	14172781	A	G	AG	TRUE	558	8926.6	AC=1;AF=0.500;AN=2;BaseQRankSum=12.341;DP=558;ExcessHet=3.0103;FS=0.713;MLEAC=1;MLEAF=0.500;MQ=60.00;MQRankSum=0.000;QD=16.08;ReadPosRankSum=-1.628;SOR=0.562	GT:AD:DP:GQ:PL	0/1:252,303:555:99:8934,0,6979	4	8.82339	8.47452	0.973655	7.40431	7.35215	0
d225030	Ib	ReepB	FBgn0033906	1	2R:14172820	0.54	2R	14172820	A	G	AG	TRUE	500	8129.6	AC=1;AF=0.500;AN=2;BaseQRankSum=13.666;DP=500;ExcessHet=3.0103;FS=4.729;MLEAC=1;MLEAF=0.500;MQ=60.00;MQRankSum=0.000;QD=16.26;ReadPosRankSum=1.736;SOR=0.369	GT:AD:DP:GQ:PL	0/1:230,270:500:99:8137,0,5452	4	8.82339	8.47452	0.973655	7.40431	7.35215	0
d225030	Ib	Ufc1	FBgn0034061	-1	2R:16007210	0.642276	2R	16007210	T	C	AG	TRUE	123	3118.6	AC=1;AF=0.500;AN=2;BaseQRankSum=5.414;DP=123;ExcessHet=3.0103;FS=1.788;MLEAC=1;MLEAF=0.500;MQ=60.00;MQRankSum=0.000;QD=25.35;ReadPosRankSum=1.093;SOR=0.975	GT:AD:DP:GQ:PL	0/1:44,79:123:99:3126,0,2223	4	3.89671	4.76406	0.198863	4.33244	4.42744	0
d225030	Ib	EMC7	FBgn0034066	-1	2R:16016880	0.318898	2R	16016880	T	C	AG	TRUE	254	2824.6	AC=1;AF=0.500;AN=2;BaseQRankSum=5.732;DP=254;ExcessHet=3.0103;FS=1.624;MLEAC=1;MLEAF=0.500;MQ=60.00;MQRankSum=0.000;QD=11.12;ReadPosRankSum=3.277;SOR=0.811	GT:AD:DP:GQ:PL	0/1:173,81:254:99:2832,0,7018	4	5.21612	4.84046	0.677238	4.60568	4.16897	0
d225030	Ib	EMC7	FBgn0034066	-1	2R:16016882	0.326446	2R	16016882	T	C	AG	TRUE	242	2824.6	AC=1;AF=0.500;AN=2;BaseQRankSum=8.166;DP=242;ExcessHet=3.0103;FS=1.057;MLEAC=1;MLEAF=0.500;MQ=60.00;MQRankSum=0.000;QD=11.67;ReadPosRankSum=3.024;SOR=0.787	GT:AD:DP:GQ:PL	0/1:163,79:242:99:2832,0,7018	4	5.21612	4.84046	0.677238	4.60568	4.16897	0
d225030	Ib	CG8405	FBgn0034071	1	2R:16048343	0.478261	2R	16048343	A	G	AG	TRUE	46	656.6	AC=1;AF=0.500;AN=2;BaseQRankSum=3.262;DP=46;ExcessHet=3.0103;FS=1.145;MLEAC=1;MLEAF=0.500;MQ=60.00;MQRankSum=0.000;QD=14.27;ReadPosRankSum=1.383;SOR=0.757	GT:AD:DP:GQ:PL	0/1:24,22:46:99:664,0,652	4	2.53302	2.65448	0.692047	1.04381	0.98824	0
d225030	Ib	pAbp	FBgn0265297	1	2R:18146333	0.336207	2R	18146333	A	G	AG	TRUE	116	941.6	AC=1;AF=0.500;AN=2;BaseQRankSum=3.180;DP=116;ExcessHet=3.0103;FS=2.804;MLEAC=1;MLEAF=0.500;MQ=60.00;MQRankSum=0.000;QD=8.12;ReadPosRankSum=-0.416;SOR=0.410	GT:AD:DP:GQ:PL	0/1:77,39:116:99:949,0,2212	4	8.63626	8.36071	0.0632563	6.39335	6.25444	0
d225030	Ib	betaTub56D	FBgn0284243	-1	2R:19447593	0.260563	2R	19447593	T	C	AG	TRUE	1162	8033.6	AC=1;AF=0.500;AN=2;BaseQRankSum=1.585;DP=1162;ExcessHet=3.0103;FS=102.233;MLEAC=1;MLEAF=0.500;MQ=60.00;MQRankSum=0.000;QD=7.07;ReadPosRankSum=0.368;SOR=4.967	GT:AD:DP:GQ:PL	0/1:840,296:1136:99:8041,0,34175	4	12.035	12.8548	5.33957e-11	7.87017	8.37422	0
d225030	Ib	CG2765	FBgn0035087	-1	2R:24961078	0.6	2R	24961078	T	C	AG	TRUE	15	279.6	AC=1;AF=0.500;AN=2;BaseQRankSum=0.349;DP=15;ExcessHet=3.0103;FS=5.021;MLEAC=1;MLEAF=0.500;MQ=60.00;MQRankSum=0.000;QD=18.64;ReadPosRankSum=0.114;SOR=1.230	GT:AD:DP:GQ:PL	0/1:6,9:15:99:287,0,175	4	2.80939	3.30576	0.862088	1.20241	1.24671	0
d225030	Ib	Pka-R2	FBgn0022382	-1	2R:9994533	0.695652	2R	9994533	T	C	AG	TRUE	46	1016.6	AC=1;AF=0.500;AN=2;BaseQRankSum=4.384;DP=46;ExcessHet=3.0103;FS=1.256;MLEAC=1;MLEAF=0.500;MQ=60.00;MQRankSum=0.000;QD=22.10;ReadPosRankSum=-0.950;SOR=0.456	GT:AD:DP:GQ:PL	0/1:14,32:46:99:1024,0,271	4	4.61114	4.8641	0.950267	2.30218	2.12679	0
d225030	Ib	Gbs-76A	FBgn0036862	-1	3L:19283264	0.416667	3L	19283264	T	C	AG	TRUE	12	114.6	AC=1;AF=0.500;AN=2;BaseQRankSum=0.245;DP=12;ExcessHet=3.0103;FS=0.000;MLEAC=1;MLEAF=0.500;MQ=60.00;MQRankSum=0.000;QD=9.55;ReadPosRankSum=-1.807;SOR=0.368	GT:AD:DP:GQ:PL	0/1:7,5:12:99:122,0,205	4	2.62452	1.40716	0.00204643	3.06808	2.85648	0
d225030	Ib	Rim	FBgn0053547	-1	3R:17873639	1	3R	17873639	T	C	AG	TRUE	19	687.03	AC=2;AF=1.00;AN=2;DP=19;ExcessHet=3.0103;FS=0.000;MLEAC=2;MLEAF=1.00;MQ=60.00;QD=28.32;SOR=1.292	GT:AD:DP:GQ:PL	1/1:0,19:19:57:701,57,0	4	4.71591	5.64873	0.00358477	0.0869337	0.149501	0
d225030	Ib	Xrp1	FBgn0261113	1	3R:18918354	0.673469	3R	18918354	A	G	AG	TRUE	98	1944.6	AC=1;AF=0.500;AN=2;BaseQRankSum=2.695;DP=98;ExcessHet=3.0103;FS=0.947;MLEAC=1;MLEAF=0.500;MQ=60.00;MQRankSum=0.000;QD=19.84;ReadPosRankSum=-0.274;SOR=0.548	GT:AD:DP:GQ:PL	0/1:32,66:98:99:1952,0,697	4	6.93525	6.63308	0.99582	5.49922	5.49918	0
d225030	Ib	ATPsynCF6	FBgn0016119	-1	3R:23355357	0.469649	3R	23355357	T	C	AG	TRUE	313	3974.6	AC=1;AF=0.500;AN=2;BaseQRankSum=7.980;DP=313;ExcessHet=3.0103;FS=2.234;MLEAC=1;MLEAF=0.500;MQ=60.00;MQRankSum=0.000;QD=12.70;ReadPosRankSum=-0.279;SOR=0.546	GT:AD:DP:GQ:PL	0/1:166,147:313:99:3982,0,4237	4	9.01907	8.99728	0.563116	8.34196	8.52202	0
d225030	Ib	Sec13	FBgn0024509	1	3R:23357683	1	3R	23357683	A	G	AG	TRUE	22	770.03	AC=2;AF=1.00;AN=2;DP=22;ExcessHet=3.0103;FS=0.000;MLEAC=2;MLEAF=1.00;MQ=60.00;QD=25.72;SOR=0.874	GT:AD:DP:GQ:PL	1/1:0,22:22:66:784,66,0	4	3.99691	3.71929	0.929505	3.0338	3.04866	0
d225030	Ib	Gdh	FBgn0001098	-1	3R:23936205	0.528455	3R	23936205	T	C	AG	TRUE	123	1929.6	AC=1;AF=0.500;AN=2;BaseQRankSum=6.636;DP=123;ExcessHet=3.0103;FS=0.000;MLEAC=1;MLEAF=0.500;MQ=60.00;MQRankSum=0.000;QD=15.69;ReadPosRankSum=-0.482;SOR=0.730	GT:AD:DP:GQ:PL	0/1:58,65:123:99:1937,0,1525	4	6.73636	5.26871	0.00814535	4.37474	4.57326	0
d225030	Ib	Sec10	FBgn0266673	1	3R:24137107	0.522727	3R	24137107	A	G	AG	TRUE	44	710.6	AC=1;AF=0.500;AN=2;BaseQRankSum=5.709;DP=44;ExcessHet=3.0103;FS=2.498;MLEAC=1;MLEAF=0.500;MQ=60.00;MQRankSum=0.000;QD=16.15;ReadPosRankSum=0.933;SOR=0.568	GT:AD:DP:GQ:PL	0/1:21,23:44:99:718,0,498	4	1.26464	1.79158	0.698029	0.62732	0.751224	0
d225030	Ib	slo	FBgn0003429	1	3R:24708329	1	3R	24708329	A	G	AG	TRUE	13	479.02	AC=2;AF=1.00;AN=2;DP=13;ExcessHet=3.0103;FS=0.000;MLEAC=2;MLEAF=1.00;MQ=60.00;QD=30.49;SOR=1.179	GT:AD:DP:GQ:PL	1/1:0,13:13:39:493,39,0	4	3.31874	4.49559	0.310436	1.1716	0.687207	0
d225030	Ib	Ald1	FBgn0000064	-1	3R:26254245	0.6	3R	26254245	T	C	AG	TRUE	75	1379.6	AC=1;AF=0.500;AN=2;BaseQRankSum=2.205;DP=75;ExcessHet=3.0103;FS=0.000;MLEAC=1;MLEAF=0.500;MQ=60.00;MQRankSum=0.000;QD=18.39;ReadPosRankSum=-2.052;SOR=0.743	GT:AD:DP:GQ:PL	0/1:30,45:75:99:1387,0,725	4	11.4026	10.0568	0.0414265	10.8637	11.1339	0
d225030	Ib	Ald1	FBgn0000064	-1	3R:26254381	0.671875	3R	26254381	T	C	AG	TRUE	64	1320.6	AC=1;AF=0.500;AN=2;BaseQRankSum=4.045;DP=64;ExcessHet=3.0103;FS=4.443;MLEAC=1;MLEAF=0.500;MQ=60.00;MQRankSum=0.000;QD=20.63;ReadPosRankSum=-1.713;SOR=1.501	GT:AD:DP:GQ:PL	0/1:21,43:64:99:1328,0,484	4	11.4026	10.0568	0.0414265	10.8637	11.1339	0
d225030	Ib	Hmu	FBgn0015737	1	3R:27290230	0.196078	3R	27290230	A	G	AG	TRUE	51	189.6	AC=1;AF=0.500;AN=2;BaseQRankSum=2.924;DP=51;ExcessHet=3.0103;FS=1.388;MLEAC=1;MLEAF=0.500;MQ=60.00;MQRankSum=0.000;QD=3.72;ReadPosRankSum=1.286;SOR=1.055	GT:AD:DP:GQ:PL	0/1:41,10:51:99:197,0,1112	4	5.87173	5.77395	0.390105	2.59234	2.73469	0
d225030	Ib	Gp93	FBgn0039562	1	3R:27951705	0.367647	3R	27951705	A	G	AG	TRUE	68	845.6	AC=1;AF=0.500;AN=2;BaseQRankSum=1.302;DP=68;ExcessHet=3.0103;FS=11.672;MLEAC=1;MLEAF=0.500;MQ=60.00;MQRankSum=0.000;QD=12.44;ReadPosRankSum=1.515;SOR=0.281	GT:AD:DP:GQ:PL	0/1:43,25:68:99:853,0,1747	4	5.46458	5.53278	0.962357	2.74479	2.53149	0
d225030	Ib	betaTub97EF	FBgn0003890	-1	3R:27967290	0.4	3R	27967290	T	C	AG	TRUE	15	217.6	AC=1;AF=0.500;AN=2;BaseQRankSum=-1.769;DP=15;ExcessHet=3.0103;FS=4.832;MLEAC=1;MLEAF=0.500;MQ=60.00;MQRankSum=0.000;QD=14.51;SOR=0.132	GT:AD:DP:GQ:PL	0/1:9,6:15:99:225,0,358	4	0.831406	0.24625	8.04814e-05	1.51149	1.698	0
d225030	Ib	betaTub97EF	FBgn0003890	-1	3R:27967292	0.4	3R	27967292	T	C	AG	TRUE	15	217.6	AC=1;AF=0.500;AN=2;BaseQRankSum=-3.719;DP=15;ExcessHet=3.0103;FS=4.832;MLEAC=1;MLEAF=0.500;MQ=60.00;MQRankSum=0.000;QD=14.51;SOR=0.132	GT:AD:DP:GQ:PL	0/1:9,6:15:99:225,0,358	4	0.831406	0.24625	8.04814e-05	1.51149	1.698	0
d225030	Ib	Pkc98E	FBgn0003093	1	3R:29046298	0.515152	3R	29046298	A	G	AG	TRUE	33	693.6	AC=1;AF=0.500;AN=2;BaseQRankSum=3.136;DP=33;ExcessHet=3.0103;FS=0.000;MLEAC=1;MLEAF=0.500;MQ=60.00;MQRankSum=0.000;QD=21.02;ReadPosRankSum=-0.289;SOR=0.582	GT:AD:DP:GQ:PL	0/1:16,17:33:99:701,0,751	4	4.42269	4.69937	0.833844	1.73884	1.5978	0
d225030	Ib	Cnx99A	FBgn0015622	-1	3R:29316804	0.315789	3R	29316804	T	C	AG	TRUE	19	205.6	AC=1;AF=0.500;AN=2;BaseQRankSum=3.038;DP=19;ExcessHet=3.0103;FS=0.000;MLEAC=1;MLEAF=0.500;MQ=60.00;MQRankSum=0.000;QD=10.82;ReadPosRankSum=-1.578;SOR=1.140	GT:AD:DP:GQ:PL	0/1:13,6:19:99:213,0,526	4	5.37514	5.28525	0.729489	2.58793	2.27049	0
d225030	Ib	Cnx99A	FBgn0015622	-1	3R:29316843	0.2	3R	29316843	T	C	AG	TRUE	45	231.6	AC=1;AF=0.500;AN=2;BaseQRankSum=3.047;DP=45;ExcessHet=3.0103;FS=0.000;MLEAC=1;MLEAF=0.500;MQ=60.00;MQRankSum=0.000;QD=5.15;ReadPosRankSum=1.049;SOR=0.478	GT:AD:DP:GQ:PL	0/1:36,9:45:99:239,0,1300	4	5.37514	5.28525	0.729489	2.58793	2.27049	0
d225030	Ib	Ptp99A	FBgn0004369	1	3R:29483303	0.5625	3R	29483303	A	G	AG	TRUE	32	519.6	AC=1;AF=0.500;AN=2;BaseQRankSum=3.640;DP=32;ExcessHet=3.0103;FS=1.745;MLEAC=1;MLEAF=0.500;MQ=60.00;MQRankSum=0.000;QD=16.24;ReadPosRankSum=0.440;SOR=1.460	GT:AD:DP:GQ:PL	0/1:14,18:32:99:527,0,324	4	4.34922	4.16541	0.576197	1.29803	1.03192	0
d225030	Ib	kay	FBgn0001297	1	3R:29792043	0.828571	3R	29792043	A	G	AG	TRUE	35	909.6	AC=1;AF=0.500;AN=2;BaseQRankSum=0.862;DP=35;ExcessHet=3.0103;FS=1.817;MLEAC=1;MLEAF=0.500;MQ=60.00;MQRankSum=0.000;QD=25.99;ReadPosRankSum=-0.636;SOR=0.404	GT:AD:DP:GQ:PL	0/1:6,29:35:99:917,0,108	4	5.08707	5.90756	0.125239	4.66592	4.33526	0
d225030	Ib	kay	FBgn0001297	1	3R:29794088	0.516667	3R	29794088	A	G	AG	TRUE	60	855.6	AC=1;AF=0.500;AN=2;BaseQRankSum=0.377;DP=60;ExcessHet=3.0103;FS=3.158;MLEAC=1;MLEAF=0.500;MQ=60.00;MQRankSum=0.000;QD=14.26;ReadPosRankSum=-2.884;SOR=1.770	GT:AD:DP:GQ:PL	0/1:29,31:60:99:863,0,808	4	5.08707	5.90756	0.125239	4.66592	4.33526	0
d225030	Ib	Etfb	FBgn0039697	-1	3R:29801970	0.538462	3R	29801970	T	C	AG	TRUE	52	720.6	AC=1;AF=0.500;AN=2;BaseQRankSum=1.241;DP=52;ExcessHet=3.0103;FS=1.076;MLEAC=1;MLEAF=0.500;MQ=60.00;MQRankSum=0.000;QD=13.86;ReadPosRankSum=1.347;SOR=0.512	GT:AD:DP:GQ:PL	0/1:24,28:52:99:728,0,625	4	3.23977	2.84256	0.833576	4.60934	4.72143	0
d225030	Ib	RpS8	FBgn0039713	1	3R:29863650	0.5	3R	29863650	A	G	AG	TRUE	42	640.6	AC=1;AF=0.500;AN=2;BaseQRankSum=3.188;DP=42;ExcessHet=3.0103;FS=4.643;MLEAC=1;MLEAF=0.500;MQ=60.00;MQRankSum=0.000;QD=15.25;ReadPosRankSum=0.896;SOR=2.252	GT:AD:DP:GQ:PL	0/1:21,21:42:99:648,0,585	4	12.4079	12.3182	0.473228	11.7965	11.7074	0
d225030	Ib	VhaAC45RP	FBgn0051030	-1	3R:30165949	1	3R	30165949	T	C	AG	TRUE	75	3227.03	AC=2;AF=1.00;AN=2;DP=75;ExcessHet=3.0103;FS=0.000;MLEAC=2;MLEAF=1.00;MQ=60.00;QD=28.41;SOR=0.892	GT:AD:DP:GQ:PL	1/1:0,75:75:99:3241,226,0	4	6.3392	6.42463	0.721484	0.410326	0.49666	0
d225030	Ib	VhaAC45RP	FBgn0051030	-1	3R:30166167	1	3R	30166167	T	C	AG	TRUE	43	2215.03	AC=2;AF=1.00;AN=2;DP=43;ExcessHet=3.0103;FS=0.000;MLEAC=2;MLEAF=1.00;MQ=60.00;QD=29.67;SOR=0.836	GT:AD:DP:GQ:PL	1/1:0,43:43:99:2229,159,0	4	6.3392	6.42463	0.721484	0.410326	0.49666	0
d225030	Ib	VhaAC45RP	FBgn0051030	-1	3R:30166215	1	3R	30166215	T	C	AG	TRUE	51	1867.03	AC=2;AF=1.00;AN=2;DP=51;ExcessHet=3.0103;FS=0.000;MLEAC=2;MLEAF=1.00;MQ=60.00;QD=27.05;SOR=1.565	GT:AD:DP:GQ:PL	1/1:0,51:51:99:1881,153,0	4	6.3392	6.42463	0.721484	0.410326	0.49666	0
d225030	Ib	zfh1	FBgn0004606	1	3R:30774448	1	3R	30774448	A	G	AG	TRUE	12	467.02	AC=2;AF=1.00;AN=2;DP=12;ExcessHet=3.0103;FS=0.000;MLEAC=2;MLEAF=1.00;MQ=60.00;QD=32.43;SOR=1.022	GT:AD:DP:GQ:PL	1/1:0,12:12:36:481,36,0	4	2.8207	5.07174	8.83719e-10	1.00111	0.940925	0
d225030	Ib	mRpL32	FBgn0039835	1	3R:31253063	0.270492	3R	31253063	A	G	AG	TRUE	124	704.6	AC=1;AF=0.500;AN=2;BaseQRankSum=3.678;DP=124;ExcessHet=3.0103;FS=0.865;MLEAC=1;MLEAF=0.500;MQ=60.00;MQRankSum=0.000;QD=5.78;ReadPosRankSum=-1.507;SOR=0.848	GT:AD:DP:GQ:PL	0/1:89,33:122:99:712,0,2446	4	2.49773	3.27599	0.876728	1.35927	1.34085	0
d225030	Ib	CycG	FBgn0039858	-1	3R:31601551	0.566667	3R	31601551	T	C	AG	TRUE	30	520.6	AC=1;AF=0.500;AN=2;BaseQRankSum=4.054;DP=30;ExcessHet=3.0103;FS=12.149;MLEAC=1;MLEAF=0.500;MQ=60.00;MQRankSum=0.000;QD=17.35;ReadPosRankSum=-0.189;SOR=2.114	GT:AD:DP:GQ:PL	0/1:13,17:30:99:528,0,303	4	6.749	7.09638	0.463947	5.43584	5.80647	0
d225030	Ib	CycG	FBgn0039858	-1	3R:31601718	0.183333	3R	31601718	T	C	AG	TRUE	60	203.6	AC=1;AF=0.500;AN=2;BaseQRankSum=4.044;DP=60;ExcessHet=3.0103;FS=2.930;MLEAC=1;MLEAF=0.500;MQ=60.00;MQRankSum=0.000;QD=3.39;ReadPosRankSum=0.173;SOR=1.248	GT:AD:DP:GQ:PL	0/1:49,11:60:99:211,0,1335	4	6.749	7.09638	0.463947	5.43584	5.80647	0
d225030	Ib	awd	FBgn0000150	-1	3R:31745955	0.741935	3R	31745955	T	C	AG	TRUE	33	638.6	AC=1;AF=0.500;AN=2;BaseQRankSum=0.556;DP=33;ExcessHet=3.0103;FS=1.808;MLEAC=1;MLEAF=0.500;MQ=60.00;MQRankSum=0.000;QD=20.60;ReadPosRankSum=1.785;SOR=1.371	GT:AD:DP:GQ:PL	0/1:8,23:31:99:646,0,132	4	11.4307	11.3852	0.780141	9.45494	9.86209	0
d225030	Ib	Frq1	FBgn0030897	1	X:18170126	0.106667	X	18170126	A	G	AG	TRUE	150	127.6	AC=1;AF=0.500;AN=2;BaseQRankSum=1.617;DP=150;ExcessHet=3.0103;FS=1.167;MLEAC=1;MLEAF=0.500;MQ=60.00;MQRankSum=0.000;QD=0.85;ReadPosRankSum=-0.967;SOR=0.814	GT:AD:DP:GQ:PL	0/1:134,16:150:99:135,0,4044	4	6.87486	6.93852	0.801616	0.138615	0.135627	0
d225030	Ib	Naa15-16	FBgn0031020	1	X:19483997	1	X	19483997	A	G	AG	TRUE	18	630.03	AC=2;AF=1.00;AN=2;DP=18;ExcessHet=3.0103;FS=0.000;MLEAC=2;MLEAF=1.00;MQ=60.00;QD=26.85;SOR=2.833	GT:AD:DP:GQ:PL	1/1:0,18:18:54:644,54,0	4	1.95719	2.3857	0.703725	0.814629	0.878925	0
d225030	Ib	CG15771	FBgn0029801	1	X:5759154	1	X	5759154	A	G	AG	TRUE	14	328.02	AC=2;AF=1.00;AN=2;DP=14;ExcessHet=3.0103;FS=0.000;MLEAC=2;MLEAF=1.00;MQ=60.00;QD=25.23;SOR=2.147	GT:AD:DP:GQ:PL	1/1:0,13:13:37:342,37,0	4	2.77403	1.38228	0.00798382	0.981371	1.0088	0
d225031	Ib	Pex19	FBgn0032407	1	2L:12094295	0.291667	2L	12094295	A	G	AG	TRUE	72	671.6	AC=1;AF=0.500;AN=2;BaseQRankSum=3.303;DP=72;ExcessHet=3.0103;FS=2.189;MLEAC=1;MLEAF=0.500;MQ=60.00;MQRankSum=0.000;QD=9.33;ReadPosRankSum=0.031;SOR=0.575	GT:AD:DP:GQ:PL	0/1:51,21:72:99:679,0,2007	4	5.52679	4.58011	0.198542	3.35329	3.35545	2.47249
d225031	Ib	Rab6	FBgn0015797	-1	2L:12107332	0.92	2L	12107332	T	C	AG	TRUE	25	627.27	AC=2;AF=1.00;AN=2;BaseQRankSum=-0.052;DP=25;ExcessHet=3.0103;FS=0.000;MLEAC=1;MLEAF=0.500;MQ=60.00;MQRankSum=0.000;QD=25.09;ReadPosRankSum=-1.209;SOR=2.753	GT:AD:DP:GQ:PL	1/1:2,23:25:2:636,2,0	4	5.65149	5.3903	0.997475	2.97474	2.86663	2.47249
d225031	Ib	CG16974	FBgn0032479	-1	2L:13189312	0.391304	2L	13189312	T	C	AG	TRUE	23	323.6	AC=1;AF=0.500;AN=2;BaseQRankSum=3.659;DP=23;ExcessHet=3.0103;FS=1.824;MLEAC=1;MLEAF=0.500;MQ=60.00;MQRankSum=0.000;QD=14.07;ReadPosRankSum=0.063;SOR=1.270	GT:AD:DP:GQ:PL	0/1:14,9:23:99:331,0,721	4	3.8107	3.63081	0.755289	1.61977	1.51626	2.47249
d225031	Ib	Smg5	FBgn0019890	-1	2L:13900038	0.784314	2L	13900038	T	C	AG	TRUE	51	1371.6	AC=1;AF=0.500;AN=2;BaseQRankSum=4.903;DP=51;ExcessHet=3.0103;FS=0.000;MLEAC=1;MLEAF=0.500;MQ=60.00;MQRankSum=0.000;QD=26.89;ReadPosRankSum=0.407;SOR=0.653	GT:AD:DP:GQ:PL	0/1:11,40:51:99:1379,0,311	4	2.63722	3.52701	0.00709555	2.46817	2.16913	2.47249
d225031	Ib	nAChRalpha5	FBgn0028875	1	2L:14089204	0.977273	2L	14089204	A	G	AG	TRUE	44	1493.03	AC=2;AF=1.00;AN=2;BaseQRankSum=1.177;DP=44;ExcessHet=3.0103;FS=0.000;MLEAC=2;MLEAF=1.00;MQ=60.00;MQRankSum=0.000;QD=33.93;ReadPosRankSum=1.543;SOR=1.061	GT:AD:DP:GQ:PL	1/1:1,43:44:99:1507,101,0	4	2.17311	2.13145	0.632364	0.0571794	0.030452	2.47249
d225031	Ib	nAChRalpha5	FBgn0028875	1	2L:14089221	1	2L	14089221	A	G	AG	TRUE	49	1635.03	AC=2;AF=1.00;AN=2;DP=49;ExcessHet=3.0103;FS=0.000;MLEAC=2;MLEAF=1.00;MQ=60.00;QD=33.37;SOR=2.256	GT:AD:DP:GQ:PL	1/1:0,49:49:99:1649,146,0	4	2.17311	2.13145	0.632364	0.0571794	0.030452	2.47249
d225031	Ib	nAChRalpha5	FBgn0028875	1	2L:14089246	1	2L	14089246	A	G	AG	TRUE	30	1069.03	AC=2;AF=1.00;AN=2;DP=30;ExcessHet=3.0103;FS=0.000;MLEAC=2;MLEAF=1.00;MQ=60.00;QD=28.45;SOR=0.976	GT:AD:DP:GQ:PL	1/1:0,30:30:90:1083,90,0	4	2.17311	2.13145	0.632364	0.0571794	0.030452	2.47249
d225031	Ib	CG9662	FBgn0031529	-1	2L:3375848	1	2L	3375848	T	C	AG	TRUE	22	850.03	AC=2;AF=1.00;AN=2;DP=22;ExcessHet=3.0103;FS=0.000;MLEAC=2;MLEAF=1.00;MQ=60.00;QD=29.75;SOR=6.273	GT:AD:DP:GQ:PL	1/1:0,22:22:66:864,66,0	4	4.79971	4.26303	0.58721	2.25071	2.37554	2.47249
d225031	Ib	Msp300	FBgn0261836	1	2L:5164694	0.127907	2L	5164694	A	G	AG	TRUE	86	116.6	AC=1;AF=0.500;AN=2;BaseQRankSum=2.271;DP=86;ExcessHet=3.0103;FS=0.000;MLEAC=1;MLEAF=0.500;MQ=60.00;MQRankSum=0.000;QD=1.36;ReadPosRankSum=-0.887;SOR=0.830	GT:AD:DP:GQ:PL	0/1:75,11:86:99:124,0,2157	4	5.66863	5.5634	0.880478	3.31906	3.19027	2.47249
d225031	Ib	Msp300	FBgn0261836	1	2L:5205966	0.359223	2L	5205966	A	G	AG	TRUE	103	827.6	AC=1;AF=0.500;AN=2;BaseQRankSum=1.861;DP=103;ExcessHet=3.0103;FS=16.413;MLEAC=1;MLEAF=0.500;MQ=60.00;MQRankSum=0.000;QD=8.03;ReadPosRankSum=-0.355;SOR=1.752	GT:AD:DP:GQ:PL	0/1:66,37:103:99:835,0,2287	4	5.66863	5.5634	0.880478	3.31906	3.19027	2.47249
d225031	Ib	Msp300	FBgn0261836	1	2L:5206015	0.297872	2L	5206015	A	G	AG	TRUE	94	479.6	AC=1;AF=0.500;AN=2;BaseQRankSum=-0.922;DP=94;ExcessHet=3.0103;FS=13.460;MLEAC=1;MLEAF=0.500;MQ=60.00;MQRankSum=0.000;QD=5.10;ReadPosRankSum=0.980;SOR=1.846	GT:AD:DP:GQ:PL	0/1:66,28:94:99:487,0,2593	4	5.66863	5.5634	0.880478	3.31906	3.19027	2.47249
d225031	Ib	Msp300	FBgn0261836	1	2L:5206020	0.588785	2L	5206020	A	G	AG	TRUE	107	2086.6	AC=1;AF=0.500;AN=2;BaseQRankSum=1.972;DP=107;ExcessHet=3.0103;FS=7.610;MLEAC=1;MLEAF=0.500;MQ=60.00;MQRankSum=0.000;QD=19.50;ReadPosRankSum=1.894;SOR=0.849	GT:AD:DP:GQ:PL	0/1:44,63:107:99:2094,0,1616	4	5.66863	5.5634	0.880478	3.31906	3.19027	2.47249
d225031	Ib	nrv2	FBgn0015777	-1	2L:6789976	0.434783	2L	6789976	T	C	AG	TRUE	24	302.6	AC=1;AF=0.500;AN=2;BaseQRankSum=4.148;DP=24;ExcessHet=3.0103;FS=3.132;MLEAC=1;MLEAF=0.500;MQ=60.00;MQRankSum=0.000;QD=13.16;ReadPosRankSum=-2.207;SOR=2.147	GT:AD:DP:GQ:PL	0/1:13,10:23:99:310,0,335	4	3.48474	2.11119	0.017969	1.38147	1.80436	2.47249
d225031	Ib	muc	FBgn0283658	1	2L:7429847	0.534884	2L	7429847	A	G	AG	TRUE	44	849.6	AC=1;AF=0.500;AN=2;BaseQRankSum=-3.525;DP=44;ExcessHet=3.0103;FS=10.255;MLEAC=1;MLEAF=0.500;MQ=60.00;MQRankSum=0.000;QD=19.76;ReadPosRankSum=-0.496;SOR=2.494	GT:AD:DP:GQ:PL	0/1:20,23:43:99:857,0,787	4	4.74482	3.37582	0.364846	4.13376	4.20774	2.47249
d225031	Ib	Nckx30C	FBgn0028704	-1	2L:9717614	0.607143	2L	9717614	T	C	AG	TRUE	56	980.6	AC=1;AF=0.500;AN=2;BaseQRankSum=2.795;DP=56;ExcessHet=3.0103;FS=3.831;MLEAC=1;MLEAF=0.500;MQ=60.00;MQRankSum=0.000;QD=17.51;ReadPosRankSum=1.626;SOR=0.984	GT:AD:DP:GQ:PL	0/1:22,34:56:99:988,0,587	4	4.99389	4.09503	0.0412382	0.0832012	0.108464	2.47249
d225031	Ib	Nckx30C	FBgn0028704	-1	2L:9733349	1	2L	9733349	T	C	AG	TRUE	41	1467.03	AC=2;AF=1.00;AN=2;DP=41;ExcessHet=3.0103;FS=0.000;MLEAC=2;MLEAF=1.00;MQ=60.00;QD=29.33;SOR=0.954	GT:AD:DP:GQ:PL	1/1:0,41:41:99:1481,123,0	4	4.99389	4.09503	0.0412382	0.0832012	0.108464	2.47249
d225031	Ib	nclb	FBgn0263510	1	2R:10876649	1	2R	10876649	A	G	AG	TRUE	12	380.02	AC=2;AF=1.00;AN=2;DP=12;ExcessHet=3.0103;FS=0.000;MLEAC=2;MLEAF=1.00;MQ=60.00;QD=34.55;SOR=4.977	GT:AD:DP:GQ:PL	1/1:0,11:11:33:394,33,0	4	2.63709	1.58521	0.250542	0.492658	0.759112	2.47249
d225031	Ib	qvr	FBgn0260499	1	2R:11447607	1	2R	11447607	A	G	AG	TRUE	37	1485.03	AC=2;AF=1.00;AN=2;DP=37;ExcessHet=3.0103;FS=0.000;MLEAC=2;MLEAF=1.00;MQ=60.00;QD=24.70;SOR=0.984	GT:AD:DP:GQ:PL	1/1:0,37:37:99:1499,111,0	4	3.052	2.03341	0.0334999	0.269526	0.0914841	2.47249
d225031	Ib	NAT1	FBgn0010488	1	2R:12921246	1	2R	12921246	A	G	AG	TRUE	12	431.02	AC=2;AF=1.00;AN=2;DP=12;ExcessHet=3.0103;FS=0.000;MLEAC=2;MLEAF=1.00;MQ=60.00;QD=26.85;SOR=1.445	GT:AD:DP:GQ:PL	1/1:0,12:12:36:445,36,0	4	4.55701	5.52808	0.00301008	4.16676	3.64409	2.47249
d225031	Ib	CG3955	FBgn0033793	-1	2R:13128147	0.517241	2R	13128147	T	C	AG	TRUE	58	881.6	AC=1;AF=0.500;AN=2;BaseQRankSum=1.776;DP=58;ExcessHet=3.0103;FS=9.759;MLEAC=1;MLEAF=0.500;MQ=60.00;MQRankSum=0.000;QD=15.20;ReadPosRankSum=1.335;SOR=0.108	GT:AD:DP:GQ:PL	0/1:28,30:58:99:889,0,824	4	4.54626	4.75042	0.982538	0.118374	0.14535	2.47249
d225031	Ib	CG6329	FBgn0033872	1	2R:13832057	1	2R	13832057	A	G	AG	TRUE	99	4382.03	AC=2;AF=1.00;AN=2;DP=99;ExcessHet=3.0103;FS=0.000;MLEAC=2;MLEAF=1.00;MQ=60.00;QD=30.76;SOR=1.321	GT:AD:DP:GQ:PL	1/1:0,99:99:99:4396,298,0	4	6.30782	5.19838	0.0246684	0.326178	0.229277	2.47249
d225031	Ib	CG6329	FBgn0033872	1	2R:13832539	0.848101	2R	13832539	A	G	AG	TRUE	79	2196.6	AC=1;AF=0.500;AN=2;BaseQRankSum=4.556;DP=79;ExcessHet=3.0103;FS=4.943;MLEAC=1;MLEAF=0.500;MQ=60.00;MQRankSum=0.000;QD=27.81;ReadPosRankSum=-2.469;SOR=0.232	GT:AD:DP:GQ:PL	0/1:12,67:79:99:2204,0,160	4	6.30782	5.19838	0.0246684	0.326178	0.229277	2.47249
d225031	Ib	ReepB	FBgn0033906	1	2R:14172781	0.345992	2R	14172781	A	G	AG	TRUE	240	2056.6	AC=1;AF=0.500;AN=2;BaseQRankSum=5.540;DP=240;ExcessHet=3.0103;FS=0.000;MLEAC=1;MLEAF=0.500;MQ=60.00;MQRankSum=0.000;QD=8.68;ReadPosRankSum=-1.586;SOR=0.707	GT:AD:DP:GQ:PL	0/1:155,82:237:99:2064,0,4350	4	8.82339	8.47452	0.973655	7.40431	7.35215	2.47249
d225031	Ib	ReepB	FBgn0033906	1	2R:14172820	0.393617	2R	14172820	A	G	AG	TRUE	188	2104.6	AC=1;AF=0.500;AN=2;BaseQRankSum=8.272;DP=188;ExcessHet=3.0103;FS=0.000;MLEAC=1;MLEAF=0.500;MQ=60.00;MQRankSum=0.000;QD=11.19;ReadPosRankSum=0.632;SOR=0.715	GT:AD:DP:GQ:PL	0/1:114,74:188:99:2112,0,2772	4	8.82339	8.47452	0.973655	7.40431	7.35215	2.47249
d225031	Ib	Opa1	FBgn0261276	-1	2R:14234798	0.178571	2R	14234798	T	C	AG	TRUE	28	92.6	AC=1;AF=0.500;AN=2;BaseQRankSum=3.037;DP=28;ExcessHet=3.0103;FS=15.911;MLEAC=1;MLEAF=0.500;MQ=60.00;MQRankSum=0.000;QD=3.31;ReadPosRankSum=-1.993;SOR=1.848	GT:AD:DP:GQ:PL	0/1:23,5:28:99:100,0,638	4	2.40495	3.13511	0.394098	1.90917	1.64868	2.47249
d225031	Ib	CG8405	FBgn0034071	1	2R:16048343	0.806452	2R	16048343	A	G	AG	TRUE	62	1517.6	AC=1;AF=0.500;AN=2;BaseQRankSum=3.593;DP=62;ExcessHet=3.0103;FS=12.819;MLEAC=1;MLEAF=0.500;MQ=60.00;MQRankSum=0.000;QD=24.48;ReadPosRankSum=-2.100;SOR=1.355	GT:AD:DP:GQ:PL	0/1:12,50:62:99:1525,0,217	4	2.53302	2.65448	0.692047	1.04381	0.98824	2.47249
d225031	Ib	CG42518	FBgn0260392	1	2R:18167781	1	2R	18167781	A	G	AG	TRUE	17	615.03	AC=2;AF=1.00;AN=2;DP=17;ExcessHet=3.0103;FS=0.000;MLEAC=2;MLEAF=1.00;MQ=60.00;QD=27.44;SOR=0.804	GT:AD:DP:GQ:PL	1/1:0,17:17:51:629,51,0	4	3.42584	4.89962	0.0806782	5.74827	5.09481	2.47249
d225031	Ib	CG13506	FBgn0034723	1	2R:22391510	1	2R	22391510	A	G	AG	TRUE	11	364.02	AC=2;AF=1.00;AN=2;DP=11;ExcessHet=3.0103;FS=0.000;MLEAC=2;MLEAF=1.00;MQ=60.00;QD=33.09;SOR=1.802	GT:AD:DP:GQ:PL	1/1:0,11:11:33:378,33,0	4	4.13675	4.31975	0.246252	0.498164	0.623232	2.47249
d225031	Ib	puml	FBgn0033226	1	2R:7813863	1	2R	7813863	A	G	AG	TRUE	21	746.03	AC=2;AF=1.00;AN=2;DP=21;ExcessHet=3.0103;FS=0.000;MLEAC=2;MLEAF=1.00;MQ=60.00;QD=23.84;SOR=0.990	GT:AD:DP:GQ:PL	1/1:0,21:21:63:760,63,0	4	2.96619	2.88029	0.815089	2.94272	2.98054	2.47249
d225031	Ib	CSN4	FBgn0027054	1	2R:7973697	1	2R	7973697	A	G	AG	TRUE	18	644.03	AC=2;AF=1.00;AN=2;DP=18;ExcessHet=3.0103;FS=0.000;MLEAC=2;MLEAF=1.00;MQ=60.00;QD=29.82;SOR=1.493	GT:AD:DP:GQ:PL	1/1:0,18:18:54:658,54,0	4	2.71701	2.92813	0.927838	3.57475	3.3122	2.47249
d225031	Ib	prel	FBgn0033413	1	2R:9425652	0.4	2R	9425652	A	G	AG	TRUE	45	477.6	AC=1;AF=0.500;AN=2;BaseQRankSum=1.797;DP=45;ExcessHet=3.0103;FS=2.597;MLEAC=1;MLEAF=0.500;MQ=60.00;MQRankSum=0.000;QD=10.61;ReadPosRankSum=-2.385;SOR=0.767	GT:AD:DP:GQ:PL	0/1:27,18:45:99:485,0,788	4	2.28608	1.30232	0.0580219	1.30797	1.26214	2.47249
d225031	Ib	CG12929	FBgn0033429	-1	2R:9586676	1	2R	9586676	T	C	AG	TRUE	46	1492.03	AC=2;AF=1.00;AN=2;DP=46;ExcessHet=3.0103;FS=0.000;MLEAC=2;MLEAF=1.00;MQ=60.00;QD=32.44;SOR=3.564	GT:AD:DP:GQ:PL	1/1:0,46:46:99:1506,138,0	4	2.88183	3.13243	0.97428	1.637	2.05958	2.47249
d225031	Ib	CG1902	FBgn0033434	1	2R:9604115	0.534483	2R	9604115	A	G	AG	TRUE	58	918.6	AC=1;AF=0.500;AN=2;BaseQRankSum=4.714;DP=58;ExcessHet=3.0103;FS=2.226;MLEAC=1;MLEAF=0.500;MQ=60.00;MQRankSum=0.000;QD=15.84;ReadPosRankSum=0.793;SOR=0.742	GT:AD:DP:GQ:PL	0/1:27,31:58:99:926,0,661	4	4.22058	3.69211	0.700445	1.77674	1.66021	2.47249
d225031	Ib	Uba1	FBgn0023143	-1	2R:9688858	1	2R	9688858	T	C	AG	TRUE	70	2465.03	AC=2;AF=1.00;AN=2;DP=70;ExcessHet=3.0103;FS=0.000;MLEAC=2;MLEAF=1.00;MQ=60.00;QD=31.62;SOR=0.941	GT:AD:DP:GQ:PL	1/1:0,70:70:99:2479,210,0	4	4.58023	4.88416	0.433921	3.14724	3.06775	2.47249
d225031	Ib	Eip75B	FBgn0000568	-1	3L:17953359	0.214286	3L	17953359	T	C	AG	TRUE	14	54.6	AC=1;AF=0.500;AN=2;BaseQRankSum=2.556;DP=14;ExcessHet=3.0103;FS=0.000;MLEAC=1;MLEAF=0.500;MQ=60.00;MQRankSum=0.000;QD=3.90;ReadPosRankSum=0.897;SOR=0.105	GT:AD:DP:GQ:PL	0/1:11,3:14:62:62,0,304	4	4.22597	5.09412	0.0543597	2.85957	2.22453	2.47249
d225031	Ib	Shab	FBgn0262593	1	3L:2941216	0.867925	3L	2941216	A	G	AG	TRUE	53	1446.6	AC=1;AF=0.500;AN=2;BaseQRankSum=0.334;DP=53;ExcessHet=3.0103;FS=6.320;MLEAC=1;MLEAF=0.500;MQ=60.00;MQRankSum=0.000;QD=27.29;ReadPosRankSum=-1.595;SOR=0.148	GT:AD:DP:GQ:PL	0/1:7,46:53:85:1454,0,85	4	3.60169	2.82872	0.0568977	0.796233	0.656306	2.47249
d225031	Ib	Shab	FBgn0262593	1	3L:2941364	0.957143	3L	2941364	A	G	AG	TRUE	70	2349.03	AC=2;AF=1.00;AN=2;BaseQRankSum=2.101;DP=70;ExcessHet=3.0103;FS=2.591;MLEAC=2;MLEAF=1.00;MQ=60.00;MQRankSum=0.000;QD=33.56;ReadPosRankSum=-0.872;SOR=1.265	GT:AD:DP:GQ:PL	1/1:3,67:70:99:2363,108,0	4	3.60169	2.82872	0.0568977	0.796233	0.656306	2.47249
d225031	Ib	Shab	FBgn0262593	1	3L:2941396	0.647887	3L	2941396	A	G	AG	TRUE	71	1419.6	AC=1;AF=0.500;AN=2;BaseQRankSum=4.709;DP=71;ExcessHet=3.0103;FS=0.954;MLEAC=1;MLEAF=0.500;MQ=60.00;MQRankSum=0.000;QD=19.99;ReadPosRankSum=1.580;SOR=0.507	GT:AD:DP:GQ:PL	0/1:25,46:71:99:1427,0,582	4	3.60169	2.82872	0.0568977	0.796233	0.656306	2.47249
d225031	Ib	Shab	FBgn0262593	1	3L:2941425	0.892857	3L	2941425	A	G	AG	TRUE	56	1614.6	AC=1;AF=0.500;AN=2;BaseQRankSum=3.057;DP=56;ExcessHet=3.0103;FS=1.790;MLEAC=1;MLEAF=0.500;MQ=60.00;MQRankSum=0.000;QD=28.83;ReadPosRankSum=-0.120;SOR=0.446	GT:AD:DP:GQ:PL	0/1:6,50:56:40:1622,0,40	4	3.60169	2.82872	0.0568977	0.796233	0.656306	2.47249
d225031	Ib	Shab	FBgn0262593	1	3L:2941426	0.961538	3L	2941426	A	G	AG	TRUE	52	2267.03	AC=2;AF=1.00;AN=2;BaseQRankSum=-1.055;DP=52;ExcessHet=3.0103;FS=0.000;MLEAC=2;MLEAF=1.00;MQ=60.00;MQRankSum=0.000;QD=24.94;ReadPosRankSum=-0.072;SOR=0.693	GT:AD:DP:GQ:PL	1/1:2,50:52:98:2281,98,0	4	3.60169	2.82872	0.0568977	0.796233	0.656306	2.47249
d225031	Ib	nAChRbeta1	FBgn0000038	1	3L:4429963	0.949045	3L	4429963	A	G	AG	TRUE	157	5500.03	AC=2;AF=1.00;AN=2;BaseQRankSum=1.965;DP=157;ExcessHet=3.0103;FS=0.000;MLEAC=2;MLEAF=1.00;MQ=60.00;MQRankSum=0.000;QD=31.28;ReadPosRankSum=-0.229;SOR=0.841	GT:AD:DP:GQ:PL	1/1:8,149:157:99:5514,188,0	4	6.35534	5.5438	0.188032	0.118617	0.0901246	2.47249
d225031	Ib	nAChRbeta1	FBgn0000038	1	3L:4430208	0.843137	3L	4430208	A	G	AG	TRUE	52	1515.6	AC=1;AF=0.500;AN=2;BaseQRankSum=1.804;DP=52;ExcessHet=3.0103;FS=10.184;MLEAC=1;MLEAF=0.500;MQ=60.00;MQRankSum=0.000;QD=29.72;ReadPosRankSum=0.639;SOR=0.059	GT:AD:DP:GQ:PL	0/1:8,43:51:99:1523,0,174	4	6.35534	5.5438	0.188032	0.118617	0.0901246	2.47249
d225031	Ib	Ciz1	FBgn0027567	1	3L:9867339	0.292683	3L	9867339	A	G	AG	TRUE	41	257.6	AC=1;AF=0.500;AN=2;BaseQRankSum=1.981;DP=41;ExcessHet=3.0103;FS=1.420;MLEAC=1;MLEAF=0.500;MQ=60.00;MQRankSum=0.000;QD=6.28;ReadPosRankSum=0.979;SOR=0.433	GT:AD:DP:GQ:PL	0/1:29,12:41:99:265,0,807	4	3.95852	3.57428	0.813704	1.37711	1.11417	2.47249
d225031	Ib	EndoA	FBgn0038659	1	3R:18907675	0.461538	3R	18907675	A	G	AG	TRUE	26	315.6	AC=1;AF=0.500;AN=2;BaseQRankSum=2.940;DP=26;ExcessHet=3.0103;FS=0.000;MLEAC=1;MLEAF=0.500;MQ=60.00;MQRankSum=0.000;QD=12.14;ReadPosRankSum=1.910;SOR=0.495	GT:AD:DP:GQ:PL	0/1:14,12:26:99:323,0,382	4	4.7728	5.29408	0.154643	0.85352	0.843628	2.47249
d225031	Ib	EndoA	FBgn0038659	1	3R:18909164	0.428571	3R	18909164	A	G	AG	TRUE	49	565.6	AC=1;AF=0.500;AN=2;BaseQRankSum=3.338;DP=49;ExcessHet=3.0103;FS=2.498;MLEAC=1;MLEAF=0.500;MQ=60.00;MQRankSum=0.000;QD=11.54;ReadPosRankSum=-0.295;SOR=1.230	GT:AD:DP:GQ:PL	0/1:28,21:49:99:573,0,649	4	4.7728	5.29408	0.154643	0.85352	0.843628	2.47249
d225031	Ib	Xrp1	FBgn0261113	1	3R:18918354	1	3R	18918354	A	G	AG	TRUE	18	631.03	AC=2;AF=1.00;AN=2;DP=18;ExcessHet=3.0103;FS=0.000;MLEAC=2;MLEAF=1.00;MQ=60.00;QD=26.28;SOR=1.863	GT:AD:DP:GQ:PL	1/1:0,18:18:54:645,54,0	4	6.93525	6.63308	0.99582	5.49922	5.49918	2.47249
d225031	Ib	vib	FBgn0267975	-1	3R:19226523	0.148148	3R	19226523	T	C	AG	TRUE	27	36.6	AC=1;AF=0.500;AN=2;BaseQRankSum=0.955;DP=27;ExcessHet=3.0103;FS=0.000;MLEAC=1;MLEAF=0.500;MQ=60.00;MQRankSum=0.000;QD=1.36;ReadPosRankSum=-0.761;SOR=0.634	GT:AD:DP:GQ:PL	0/1:23,4:27:44:44,0,567	4	5.02601	5.14846	0.946513	3.41525	3.2449	2.47249
d225031	Ib	Cow	FBgn0039054	-1	3R:23112549	0.541667	3R	23112549	T	C	AG	TRUE	48	770.6	AC=1;AF=0.500;AN=2;BaseQRankSum=3.389;DP=48;ExcessHet=3.0103;FS=0.000;MLEAC=1;MLEAF=0.500;MQ=60.00;MQRankSum=0.000;QD=16.05;ReadPosRankSum=0.114;SOR=0.669	GT:AD:DP:GQ:PL	0/1:22,26:48:99:778,0,584	4	6.07048	6.14794	0.757327	0.0371922	0.0664222	2.47249
d225031	Ib	unk	FBgn0004395	-1	3R:23152544	1	3R	23152544	T	C	AG	TRUE	88	3885.03	AC=2;AF=1.00;AN=2;DP=88;ExcessHet=3.0103;FS=0.000;MLEAC=2;MLEAF=1.00;MQ=60.00;QD=22.63;SOR=4.664	GT:AD:DP:GQ:PL	1/1:0,88:88:99:3899,265,0	4	3.87848	4.24654	0.727859	1.67041	1.89778	2.47249
d225031	Ib	ATPsynCF6	FBgn0016119	-1	3R:23355357	0.469027	3R	23355357	T	C	AG	TRUE	113	1374.6	AC=1;AF=0.500;AN=2;BaseQRankSum=0.635;DP=113;ExcessHet=3.0103;FS=1.986;MLEAC=1;MLEAF=0.500;MQ=60.00;MQRankSum=0.000;QD=12.16;ReadPosRankSum=0.218;SOR=0.468	GT:AD:DP:GQ:PL	0/1:60,53:113:99:1382,0,1703	4	9.01907	8.99728	0.563116	8.34196	8.52202	2.47249
d225031	Ib	slo	FBgn0003429	1	3R:24675663	1	3R	24675663	A	G	AG	TRUE	22	755.03	AC=2;AF=1.00;AN=2;DP=22;ExcessHet=3.0103;FS=0.000;MLEAC=2;MLEAF=1.00;MQ=60.00;QD=34.32;SOR=3.258	GT:AD:DP:GQ:PL	1/1:0,22:22:66:769,66,0	4	3.31874	4.49559	0.310436	1.1716	0.687207	2.47249
d225031	Ib	Ald1	FBgn0000064	-1	3R:26254245	0.254826	3R	26254245	T	C	AG	TRUE	259	1470.6	AC=1;AF=0.500;AN=2;BaseQRankSum=4.572;DP=259;ExcessHet=3.0103;FS=0.000;MLEAC=1;MLEAF=0.500;MQ=60.00;MQRankSum=0.000;QD=5.68;ReadPosRankSum=0.600;SOR=0.681	GT:AD:DP:GQ:PL	0/1:193,66:259:99:1478,0,5693	4	11.4026	10.0568	0.0414265	10.8637	11.1339	2.47249
d225031	Ib	Ald1	FBgn0000064	-1	3R:26254381	0.256281	3R	26254381	T	C	AG	TRUE	398	2492.6	AC=1;AF=0.500;AN=2;BaseQRankSum=8.973;DP=398;ExcessHet=3.0103;FS=9.698;MLEAC=1;MLEAF=0.500;MQ=60.00;MQRankSum=0.000;QD=6.26;ReadPosRankSum=0.840;SOR=0.690	GT:AD:DP:GQ:PL	0/1:296,102:398:99:2500,0,8861	4	11.4026	10.0568	0.0414265	10.8637	11.1339	2.47249
d225031	Ib	Gp93	FBgn0039562	1	3R:27951705	0.3	3R	27951705	A	G	AG	TRUE	50	515.6	AC=1;AF=0.500;AN=2;BaseQRankSum=3.500;DP=50;ExcessHet=3.0103;FS=2.692;MLEAC=1;MLEAF=0.500;MQ=60.00;MQRankSum=0.000;QD=10.31;ReadPosRankSum=-0.223;SOR=1.016	GT:AD:DP:GQ:PL	0/1:35,15:50:99:523,0,1425	4	5.46458	5.53278	0.962357	2.74479	2.53149	2.47249
d225031	Ib	Cnx99A	FBgn0015622	-1	3R:29316804	1	3R	29316804	T	C	AG	TRUE	14	613.03	AC=2;AF=1.00;AN=2;DP=14;ExcessHet=3.0103;FS=0.000;MLEAC=2;MLEAF=1.00;MQ=60.00;QD=31.25;SOR=1.765	GT:AD:DP:GQ:PL	1/1:0,14:14:42:627,42,0	4	5.37514	5.28525	0.729489	2.58793	2.27049	2.47249
d225031	Ib	Cnx99A	FBgn0015622	-1	3R:29316843	1	3R	29316843	T	C	AG	TRUE	26	1156.03	AC=2;AF=1.00;AN=2;DP=26;ExcessHet=3.0103;FS=0.000;MLEAC=2;MLEAF=1.00;MQ=60.00;QD=29.48;SOR=1.445	GT:AD:DP:GQ:PL	1/1:0,26:26:78:1170,78,0	4	5.37514	5.28525	0.729489	2.58793	2.27049	2.47249
d225031	Ib	CG1907	FBgn0039674	1	3R:29620590	1	3R	29620590	A	G	AG	TRUE	13	571.02	AC=2;AF=1.00;AN=2;DP=13;ExcessHet=3.0103;FS=0.000;MLEAC=2;MLEAF=1.00;MQ=60.00;QD=23.87;SOR=1.179	GT:AD:DP:GQ:PL	1/1:0,13:13:39:585,39,0	4	2.96927	1.9565	0.114002	3.63121	3.23907	2.47249
d225031	Ib	kay	FBgn0001297	1	3R:29792043	0.4	3R	29792043	A	G	AG	TRUE	55	557.6	AC=1;AF=0.500;AN=2;BaseQRankSum=2.162;DP=55;ExcessHet=3.0103;FS=0.000;MLEAC=1;MLEAF=0.500;MQ=60.00;MQRankSum=0.000;QD=10.14;ReadPosRankSum=1.485;SOR=0.535	GT:AD:DP:GQ:PL	0/1:33,22:55:99:565,0,873	4	5.08707	5.90756	0.125239	4.66592	4.33526	2.47249
d225031	Ib	kay	FBgn0001297	1	3R:29794088	0.315789	3R	29794088	A	G	AG	TRUE	19	141.6	AC=1;AF=0.500;AN=2;BaseQRankSum=0.596;DP=19;ExcessHet=3.0103;FS=0.000;MLEAC=1;MLEAF=0.500;MQ=60.00;MQRankSum=0.000;QD=7.45;ReadPosRankSum=-0.313;SOR=0.770	GT:AD:DP:GQ:PL	0/1:13,6:19:99:149,0,372	4	5.08707	5.90756	0.125239	4.66592	4.33526	2.47249
d225031	Ib	RpS8	FBgn0039713	1	3R:29863650	0.777778	3R	29863650	A	G	AG	TRUE	18	411.6	AC=1;AF=0.500;AN=2;BaseQRankSum=-0.602;DP=18;ExcessHet=3.0103;FS=0.000;MLEAC=1;MLEAF=0.500;MQ=60.00;MQRankSum=0.000;QD=22.87;ReadPosRankSum=0.331;SOR=1.085	GT:AD:DP:GQ:PL	0/1:4,14:18:95:419,0,95	4	12.4079	12.3182	0.473228	11.7965	11.7074	2.47249
d225031	Ib	VhaAC45RP	FBgn0051030	-1	3R:30165949	0.632075	3R	30165949	T	C	AG	TRUE	107	2568.6	AC=1;AF=0.500;AN=2;BaseQRankSum=-0.224;DP=107;ExcessHet=3.0103;FS=12.507;MLEAC=1;MLEAF=0.500;MQ=60.00;MQRankSum=0.000;QD=24.23;ReadPosRankSum=-0.791;SOR=1.819	GT:AD:DP:GQ:PL	0/1:39,67:106:99:2576,0,1436	4	6.3392	6.42463	0.721484	0.410326	0.49666	2.47249
d225031	Ib	VhaAC45RP	FBgn0051030	-1	3R:30166167	0.487179	3R	30166167	T	C	AG	TRUE	78	1618.6	AC=1;AF=0.500;AN=2;BaseQRankSum=5.189;DP=78;ExcessHet=3.0103;FS=7.438;MLEAC=1;MLEAF=0.500;MQ=60.00;MQRankSum=0.000;QD=20.75;ReadPosRankSum=-0.436;SOR=1.282	GT:AD:DP:GQ:PL	0/1:40,38:78:99:1626,0,1524	4	6.3392	6.42463	0.721484	0.410326	0.49666	2.47249
d225031	Ib	VhaAC45RP	FBgn0051030	-1	3R:30166215	0.5	3R	30166215	T	C	AG	TRUE	78	1171.6	AC=1;AF=0.500;AN=2;BaseQRankSum=5.466;DP=78;ExcessHet=3.0103;FS=4.669;MLEAC=1;MLEAF=0.500;MQ=60.00;MQRankSum=0.000;QD=15.02;ReadPosRankSum=0.871;SOR=0.294	GT:AD:DP:GQ:PL	0/1:39,39:78:99:1179,0,998	4	6.3392	6.42463	0.721484	0.410326	0.49666	2.47249
d225031	Ib	CG12071	FBgn0039808	-1	3R:30878429	0.241379	3R	30878429	T	C	AG	TRUE	29	142.6	AC=1;AF=0.500;AN=2;BaseQRankSum=1.594;DP=29;ExcessHet=3.0103;FS=6.945;MLEAC=1;MLEAF=0.500;MQ=60.00;MQRankSum=0.000;QD=4.92;ReadPosRankSum=1.511;SOR=2.279	GT:AD:DP:GQ:PL	0/1:22,7:29:99:150,0,634	4	1.75488	1.95826	0.905929	0.244526	0.20508	2.47249
d225031	Ib	CycG	FBgn0039858	-1	3R:31601551	0.326531	3R	31601551	T	C	AG	TRUE	49	425.6	AC=1;AF=0.500;AN=2;BaseQRankSum=3.941;DP=49;ExcessHet=3.0103;FS=11.441;MLEAC=1;MLEAF=0.500;MQ=60.00;MQRankSum=0.000;QD=8.69;ReadPosRankSum=-0.663;SOR=1.492	GT:AD:DP:GQ:PL	0/1:33,16:49:99:433,0,948	4	6.749	7.09638	0.463947	5.43584	5.80647	2.47249
d225031	Ib	CycG	FBgn0039858	-1	3R:31601718	0.350877	3R	31601718	T	C	AG	TRUE	57	549.6	AC=1;AF=0.500;AN=2;BaseQRankSum=5.398;DP=57;ExcessHet=3.0103;FS=3.764;MLEAC=1;MLEAF=0.500;MQ=60.00;MQRankSum=0.000;QD=9.64;ReadPosRankSum=1.923;SOR=0.712	GT:AD:DP:GQ:PL	0/1:37,20:57:99:557,0,1041	4	6.749	7.09638	0.463947	5.43584	5.80647	2.47249
d225031	Ib	CycG	FBgn0039858	-1	3R:31601828	0.229508	3R	31601828	T	C	AG	TRUE	61	279.6	AC=1;AF=0.500;AN=2;BaseQRankSum=3.493;DP=61;ExcessHet=3.0103;FS=1.154;MLEAC=1;MLEAF=0.500;MQ=60.00;MQRankSum=0.000;QD=4.58;ReadPosRankSum=-1.164;SOR=0.926	GT:AD:DP:GQ:PL	0/1:47,14:61:99:287,0,1239	4	6.749	7.09638	0.463947	5.43584	5.80647	2.47249
d225031	Ib	awd	FBgn0000150	-1	3R:31745955	0.47619	3R	31745955	T	C	AG	TRUE	21	312.6	AC=1;AF=0.500;AN=2;BaseQRankSum=3.245;DP=21;ExcessHet=3.0103;FS=0.000;MLEAC=1;MLEAF=0.500;MQ=60.00;MQRankSum=0.000;QD=14.89;ReadPosRankSum=-0.356;SOR=1.179	GT:AD:DP:GQ:PL	0/1:11,10:21:99:320,0,270	4	11.4307	11.3852	0.780141	9.45494	9.86209	2.47249
d225031	Ib	cpx	FBgn0041605	1	3R:4297504	0.330645	3R	4297504	A	G	AG	TRUE	125	901.6	AC=1;AF=0.500;AN=2;BaseQRankSum=3.286;DP=125;ExcessHet=3.0103;FS=1.127;MLEAC=1;MLEAF=0.500;MQ=60.00;MQRankSum=0.000;QD=7.27;ReadPosRankSum=-0.690;SOR=0.940	GT:AD:DP:GQ:PL	0/1:83,41:124:99:909,0,2527	4	7.90852	7.29727	0.637321	0.177459	0.228242	2.47249
d225031	Ib	cpx	FBgn0041605	1	3R:4301142	0.320513	3R	4301142	A	G	AG	TRUE	78	676.6	AC=1;AF=0.500;AN=2;BaseQRankSum=2.683;DP=78;ExcessHet=3.0103;FS=1.092;MLEAC=1;MLEAF=0.500;MQ=60.00;MQRankSum=0.000;QD=8.67;ReadPosRankSum=0.934;SOR=0.887	GT:AD:DP:GQ:PL	0/1:53,25:78:99:684,0,1970	4	7.90852	7.29727	0.637321	0.177459	0.228242	2.47249
d225031	Ib	cpx	FBgn0041605	1	3R:4301150	0.507463	3R	4301150	A	G	AG	TRUE	67	1204.6	AC=1;AF=0.500;AN=2;BaseQRankSum=1.661;DP=67;ExcessHet=3.0103;FS=2.295;MLEAC=1;MLEAF=0.500;MQ=60.00;MQRankSum=0.000;QD=17.98;ReadPosRankSum=0.534;SOR=1.061	GT:AD:DP:GQ:PL	0/1:33,34:67:99:1212,0,1203	4	7.90852	7.29727	0.637321	0.177459	0.228242	2.47249
d225031	Ib	cpx	FBgn0041605	1	3R:4301244	0.375	3R	4301244	A	G	AG	TRUE	56	750.6	AC=1;AF=0.500;AN=2;BaseQRankSum=4.156;DP=56;ExcessHet=3.0103;FS=1.075;MLEAC=1;MLEAF=0.500;MQ=60.00;MQRankSum=0.000;QD=13.40;ReadPosRankSum=1.179;SOR=1.011	GT:AD:DP:GQ:PL	0/1:35,21:56:99:758,0,1236	4	7.90852	7.29727	0.637321	0.177459	0.228242	2.47249
d225031	Ib	CG1090	FBgn0037238	1	3R:4365385	0.298701	3R	4365385	A	G	AG	TRUE	77	518.6	AC=1;AF=0.500;AN=2;BaseQRankSum=1.504;DP=77;ExcessHet=3.0103;FS=5.156;MLEAC=1;MLEAF=0.500;MQ=60.00;MQRankSum=0.000;QD=6.74;ReadPosRankSum=-0.056;SOR=0.270	GT:AD:DP:GQ:PL	0/1:54,23:77:99:526,0,1730	4	4.19836	3.59903	0.876728	0.070259	0.0808403	2.47249
d225031	Ib	Vha26	FBgn0283535	1	3R:5594099	0.192661	3R	5594099	A	G	AG	TRUE	109	440.6	AC=1;AF=0.500;AN=2;BaseQRankSum=5.869;DP=109;ExcessHet=3.0103;FS=1.998;MLEAC=1;MLEAF=0.500;MQ=60.00;MQRankSum=0.000;QD=4.04;ReadPosRankSum=0.808;SOR=0.990	GT:AD:DP:GQ:PL	0/1:88,21:109:99:448,0,2630	4	7.31501	7.15393	0.778039	4.68759	4.94428	2.47249
d225031	Ib	cac	FBgn0263111	-1	X:11977538	1	X	11977538	T	C	AG	TRUE	18	641.03	AC=2;AF=1.00;AN=2;DP=18;ExcessHet=3.0103;FS=0.000;MLEAC=2;MLEAF=1.00;MQ=60.00;QD=32.13;SOR=1.863	GT:AD:DP:GQ:PL	1/1:0,18:18:54:655,54,0	4	4.16093	4.30898	0.905929	0.0597302	0.0545455	2.47249
d225031	Ib	OtopLa	FBgn0259994	-1	X:5631035	1	X	5631035	T	C	AG	TRUE	26	1108.03	AC=2;AF=1.00;AN=2;DP=26;ExcessHet=3.0103;FS=0.000;MLEAC=2;MLEAF=1.00;MQ=60.00;QD=33.06;SOR=1.445	GT:AD:DP:GQ:PL	1/1:0,26:26:78:1122,78,0	4	4.25873	3.80584	0.230532	0.129723	0.050683	2.47249
d225031	Ib	OtopLa	FBgn0259994	-1	X:5631048	1	X	5631048	T	C	AG	TRUE	31	1407.03	AC=2;AF=1.00;AN=2;DP=31;ExcessHet=3.0103;FS=0.000;MLEAC=2;MLEAF=1.00;MQ=60.00;QD=28.69;SOR=1.044	GT:AD:DP:GQ:PL	1/1:0,31:31:99:1421,102,0	4	4.25873	3.80584	0.230532	0.129723	0.050683	2.47249
d225041	Ib	CG33303	FBgn0053303	-1	2L:10374727	0.8	2L	10374727	T	C	AG	TRUE	20	471.6	AC=1;AF=0.500;AN=2;BaseQRankSum=1.831;DP=20;ExcessHet=3.0103;FS=0.000;MLEAC=1;MLEAF=0.500;MQ=60.00;MQRankSum=0.000;QD=23.58;ReadPosRankSum=1.564;SOR=0.481	GT:AD:DP:GQ:PL	0/1:4,16:20:50:479,0,50	4	4.82255	3.93282	0.505552	2.43097	2.84372	3.9514
d225041	Ib	Pex19	FBgn0032407	1	2L:12094295	0.266667	2L	12094295	A	G	AG	TRUE	30	254.6	AC=1;AF=0.500;AN=2;BaseQRankSum=2.275;DP=30;ExcessHet=3.0103;FS=4.155;MLEAC=1;MLEAF=0.500;MQ=60.00;MQRankSum=0.000;QD=8.49;ReadPosRankSum=-0.590;SOR=0.157	GT:AD:DP:GQ:PL	0/1:22,8:30:99:262,0,879	4	5.52679	4.58011	0.198542	3.35329	3.35545	3.9514
d225041	Ib	Snx21	FBgn0031457	-1	2L:2764358	0.411765	2L	2764358	T	C	AG	TRUE	17	256.6	AC=1;AF=0.500;AN=2;BaseQRankSum=-2.565;DP=17;ExcessHet=3.0103;FS=13.554;MLEAC=1;MLEAF=0.500;MQ=60.00;MQRankSum=0.000;QD=15.09;ReadPosRankSum=-2.325;SOR=4.174	GT:AD:DP:GQ:PL	0/1:10,7:17:99:264,0,399	4	3.71689	5.92923	0.00165457	2.46603	2.37167	3.9514
d225041	Ib	Snx21	FBgn0031457	-1	2L:2764371	0.25	2L	2764371	T	C	AG	TRUE	16	118.6	AC=1;AF=0.500;AN=2;BaseQRankSum=-0.061;DP=16;ExcessHet=3.0103;FS=10.532;MLEAC=1;MLEAF=0.500;MQ=60.00;MQRankSum=0.000;QD=7.41;ReadPosRankSum=-1.826;SOR=3.241	GT:AD:DP:GQ:PL	0/1:12,4:16:99:126,0,557	4	3.71689	5.92923	0.00165457	2.46603	2.37167	3.9514
d225041	Ib	Hydr2	FBgn0014906	1	2L:3167771	1	2L	3167771	A	G	AG	TRUE	23	755.03	AC=2;AF=1.00;AN=2;DP=23;ExcessHet=3.0103;FS=0.000;MLEAC=2;MLEAF=1.00;MQ=60.00;QD=32.83;SOR=2.030	GT:AD:DP:GQ:PL	1/1:0,23:23:69:769,69,0	4	2.47882	1.81392	0.0606409	0.927258	1.49242	3.9514
d225041	Ib	GramD1B	FBgn0085423	-1	2L:3358929	0.5	2L	3358929	T	C	AG	TRUE	28	386.6	AC=1;AF=0.500;AN=2;BaseQRankSum=1.986;DP=28;ExcessHet=3.0103;FS=5.988;MLEAC=1;MLEAF=0.500;MQ=60.00;MQRankSum=0.000;QD=13.81;ReadPosRankSum=0.231;SOR=0.620	GT:AD:DP:GQ:PL	0/1:14,14:28:99:394,0,379	4	1.42535	1.38029	0.93415	0.581157	0.778327	3.9514
d225041	Ib	CG9662	FBgn0031529	-1	2L:3375848	1	2L	3375848	T	C	AG	TRUE	15	585.03	AC=2;AF=1.00;AN=2;DP=15;ExcessHet=3.0103;FS=0.000;MLEAC=2;MLEAF=1.00;MQ=60.00;QD=29.46;SOR=4.047	GT:AD:DP:GQ:PL	1/1:0,15:15:45:599,45,0	4	4.79971	4.26303	0.58721	2.25071	2.37554	3.9514
d225041	Ib	Snx1	FBgn0031534	1	2L:3451842	0.20339	2L	3451842	A	G	AG	TRUE	59	270.6	AC=1;AF=0.500;AN=2;BaseQRankSum=4.060;DP=59;ExcessHet=3.0103;FS=12.769;MLEAC=1;MLEAF=0.500;MQ=60.00;MQRankSum=0.000;QD=4.59;ReadPosRankSum=1.115;SOR=1.259	GT:AD:DP:GQ:PL	0/1:47,12:59:99:278,0,1229	4	1.59001	2.6723	0.203485	1.66581	1.77491	3.9514
d225041	Ib	fipi	FBgn0031627	-1	2L:4735173	0.513514	2L	4735173	T	C	AG	TRUE	111	1661.6	AC=1;AF=0.500;AN=2;BaseQRankSum=3.567;DP=111;ExcessHet=3.0103;FS=0.709;MLEAC=1;MLEAF=0.500;MQ=60.00;MQRankSum=0.000;QD=14.97;ReadPosRankSum=0.089;SOR=0.790	GT:AD:DP:GQ:PL	0/1:54,57:111:99:1669,0,1483	4	5.70931	5.32823	0.250204	0.307762	0.421432	3.9514
d225041	Ib	CG31650	FBgn0031673	-1	2L:5042598	0.657143	2L	5042598	T	C	AG	TRUE	35	751.6	AC=1;AF=0.500;AN=2;BaseQRankSum=3.396;DP=35;ExcessHet=3.0103;FS=11.046;MLEAC=1;MLEAF=0.500;MQ=60.00;MQRankSum=0.000;QD=21.47;ReadPosRankSum=0.245;SOR=1.971	GT:AD:DP:GQ:PL	0/1:12,23:35:99:759,0,273	4	4.95708	5.02313	0.952346	2.11362	1.73761	3.9514
d225041	Ib	Msp300	FBgn0261836	1	2L:5206015	0.526316	2L	5206015	A	G	AG	TRUE	19	273.6	AC=1;AF=0.500;AN=2;BaseQRankSum=0.208;DP=19;ExcessHet=3.0103;FS=4.320;MLEAC=1;MLEAF=0.500;MQ=60.00;MQRankSum=0.000;QD=14.40;ReadPosRankSum=-0.370;SOR=1.546	GT:AD:DP:GQ:PL	0/1:9,10:19:99:281,0,266	4	5.66863	5.5634	0.880478	3.31906	3.19027	3.9514
d225041	Ib	Proc	FBgn0045038	-1	2L:7865825	1	2L	7865825	T	C	AG	TRUE	65	2237.03	AC=2;AF=1.00;AN=2;DP=65;ExcessHet=3.0103;FS=0.000;MLEAC=2;MLEAF=1.00;MQ=60.00;QD=34.42;SOR=0.787	GT:AD:DP:GQ:PL	1/1:0,65:65:99:2251,195,0	4	9.63479	10.5226	2.51921e-05	0.0321158	0.203318	3.9514
d225041	Ib	Akap200	FBgn0027932	1	2L:8415798	0.4	2L	8415798	A	G	AG	TRUE	30	271.6	AC=1;AF=0.500;AN=2;BaseQRankSum=1.267;DP=30;ExcessHet=3.0103;FS=1.688;MLEAC=1;MLEAF=0.500;MQ=60.00;MQRankSum=0.000;QD=9.05;ReadPosRankSum=-0.128;SOR=0.307	GT:AD:DP:GQ:PL	0/1:18,12:30:99:279,0,462	4	7.14929	7.38323	0.779992	2.49923	2.83286	3.9514
d225041	Ib	14-3-3zeta	FBgn0004907	1	2R:10108800	0.214286	2R	10108800	A	G	AG	TRUE	28	177.6	AC=1;AF=0.500;AN=2;BaseQRankSum=0.396;DP=28;ExcessHet=3.0103;FS=0.000;MLEAC=1;MLEAF=0.500;MQ=60.00;MQRankSum=0.000;QD=6.34;ReadPosRankSum=-0.169;SOR=0.883	GT:AD:DP:GQ:PL	0/1:22,6:28:99:185,0,1276	4	10.0161	10.0638	0.920612	8.20641	7.91397	3.9514
d225041	Ib	14-3-3zeta	FBgn0004907	1	2R:10108801	0.285714	2R	10108801	A	G	AG	TRUE	28	254.6	AC=1;AF=0.500;AN=2;BaseQRankSum=1.014;DP=28;ExcessHet=3.0103;FS=3.780;MLEAC=1;MLEAF=0.500;MQ=60.00;MQRankSum=0.000;QD=9.09;ReadPosRankSum=-0.102;SOR=1.565	GT:AD:DP:GQ:PL	0/1:20,8:28:99:262,0,562	4	10.0161	10.0638	0.920612	8.20641	7.91397	3.9514
d225041	Ib	14-3-3zeta	FBgn0004907	1	2R:10108802	0.222222	2R	10108802	A	G	AG	TRUE	27	177.6	AC=1;AF=0.500;AN=2;BaseQRankSum=-1.153;DP=27;ExcessHet=3.0103;FS=0.000;MLEAC=1;MLEAF=0.500;MQ=60.00;MQRankSum=0.000;QD=6.58;ReadPosRankSum=-0.147;SOR=0.765	GT:AD:DP:GQ:PL	0/1:21,6:27:99:185,0,1276	4	10.0161	10.0638	0.920612	8.20641	7.91397	3.9514
d225041	Ib	RpS15Ab	FBgn0033555	1	2R:10822219	0.105263	2R	10822219	A	G	AG	TRUE	38	47.6	AC=1;AF=0.500;AN=2;BaseQRankSum=-1.437;DP=38;ExcessHet=3.0103;FS=14.596;MLEAC=1;MLEAF=0.500;MQ=60.00;MQRankSum=0.000;QD=1.25;ReadPosRankSum=0.929;SOR=1.401	GT:AD:DP:GQ:PL	0/1:34,4:38:55:55,0,1316	4	3.76529	3.1313	0.134754	5.69163	5.75158	3.9514
d225041	Ib	RpS15Ab	FBgn0033555	1	2R:10822309	0.36	2R	10822309	A	G	AG	TRUE	25	214.6	AC=1;AF=0.500;AN=2;BaseQRankSum=1.100;DP=25;ExcessHet=3.0103;FS=45.699;MLEAC=1;MLEAF=0.500;MQ=60.00;MQRankSum=0.000;QD=8.58;ReadPosRankSum=-0.200;SOR=4.606	GT:AD:DP:GQ:PL	0/1:16,9:25:99:222,0,408	4	3.76529	3.1313	0.134754	5.69163	5.75158	3.9514
d225041	Ib	Prp8	FBgn0033688	-1	2R:12162664	0.755102	2R	12162664	T	C	AG	TRUE	98	2168.6	AC=1;AF=0.500;AN=2;BaseQRankSum=1.161;DP=98;ExcessHet=3.0103;FS=3.174;MLEAC=1;MLEAF=0.500;MQ=60.00;MQRankSum=0.000;QD=22.13;ReadPosRankSum=1.130;SOR=0.572	GT:AD:DP:GQ:PL	0/1:24,74:98:99:2176,0,530	4	2.25265	2.28292	0.753948	0.79197	1.00345	3.9514
d225041	Ib	bbc	FBgn0033844	-1	2R:13486995	1	2R	13486995	T	C	AG	TRUE	12	395.02	AC=2;AF=1.00;AN=2;DP=12;ExcessHet=3.0103;FS=0.000;MLEAC=2;MLEAF=1.00;MQ=60.00;QD=32.92;SOR=1.445	GT:AD:DP:GQ:PL	1/1:0,12:12:36:409,36,0	4	2.43079	2.35712	0.725008	1.06293	1.18129	3.9514
d225041	Ib	Prosap	FBgn0040752	-1	2R:14062651	0.315789	2R	14062651	T	C	AG	TRUE	19	159.6	AC=1;AF=0.500;AN=2;BaseQRankSum=2.974;DP=19;ExcessHet=3.0103;FS=0.000;MLEAC=1;MLEAF=0.500;MQ=60.00;MQRankSum=0.000;QD=8.40;ReadPosRankSum=1.367;SOR=0.569	GT:AD:DP:GQ:PL	0/1:13,6:19:99:167,0,354	4	3.67189	3.09119	0.0790468	0.867644	0.923605	3.9514
d225041	Ib	Rpn6	FBgn0028689	-1	2R:14751349	0.5	2R	14751349	T	C	AG	TRUE	18	306.6	AC=1;AF=0.500;AN=2;BaseQRankSum=2.072;DP=18;ExcessHet=3.0103;FS=1.957;MLEAC=1;MLEAF=0.500;MQ=60.00;MQRankSum=0.000;QD=17.03;ReadPosRankSum=-1.689;SOR=1.324	GT:AD:DP:GQ:PL	0/1:9,9:18:99:314,0,413	4	5.22049	6.17786	0.412321	5.26645	4.73751	3.9514
d225041	Ib	Gmppa	FBgn0034035	-1	2R:15677332	0.413793	2R	15677332	T	C	AG	TRUE	29	255.6	AC=1;AF=0.500;AN=2;BaseQRankSum=-0.721;DP=29;ExcessHet=3.0103;FS=1.744;MLEAC=1;MLEAF=0.500;MQ=60.00;MQRankSum=0.000;QD=8.81;ReadPosRankSum=-0.445;SOR=0.368	GT:AD:DP:GQ:PL	0/1:17,12:29:99:263,0,481	4	2.13825	1.80404	0.769491	1.54195	1.7944	3.9514
d225041	Ib	Diap2	FBgn0015247	-1	2R:15933013	1	2R	15933013	T	C	AG	TRUE	13	461.02	AC=2;AF=1.00;AN=2;DP=13;ExcessHet=3.0103;FS=0.000;MLEAC=2;MLEAF=1.00;MQ=60.00;QD=26.11;SOR=0.836	GT:AD:DP:GQ:PL	1/1:0,13:13:39:475,39,0	4	2.21743	2.14379	0.569937	1.94321	1.78065	3.9514
d225041	Ib	CG8405	FBgn0034071	1	2R:16048343	0.235294	2R	16048343	A	G	AG	TRUE	153	770.6	AC=1;AF=0.500;AN=2;BaseQRankSum=5.352;DP=153;ExcessHet=3.0103;FS=2.465;MLEAC=1;MLEAF=0.500;MQ=60.00;MQRankSum=0.000;QD=5.04;ReadPosRankSum=0.475;SOR=0.964	GT:AD:DP:GQ:PL	0/1:117,36:153:99:778,0,3154	4	2.53302	2.65448	0.692047	1.04381	0.98824	3.9514
d225041	Ib	mago	FBgn0002736	1	2R:21128870	0.297297	2R	21128870	A	G	AG	TRUE	37	361.6	AC=1;AF=0.500;AN=2;BaseQRankSum=2.168;DP=37;ExcessHet=3.0103;FS=3.520;MLEAC=1;MLEAF=0.500;MQ=60.00;MQRankSum=0.000;QD=9.77;ReadPosRankSum=0.751;SOR=1.488	GT:AD:DP:GQ:PL	0/1:26,11:37:99:369,0,1260	4	3.46187	3.46022	0.901201	3.13284	3.19197	3.9514
d225041	Ib	mago	FBgn0002736	1	2R:21128873	0.268293	2R	21128873	A	G	AG	TRUE	41	361.6	AC=1;AF=0.500;AN=2;BaseQRankSum=2.934;DP=41;ExcessHet=3.0103;FS=7.752;MLEAC=1;MLEAF=0.500;MQ=60.00;MQRankSum=0.000;QD=8.82;ReadPosRankSum=1.475;SOR=2.044	GT:AD:DP:GQ:PL	0/1:30,11:41:99:369,0,1260	4	3.46187	3.46022	0.901201	3.13284	3.19197	3.9514
d225041	Ib	mago	FBgn0002736	1	2R:21128882	0.243902	2R	21128882	A	G	AG	TRUE	41	305.6	AC=1;AF=0.500;AN=2;BaseQRankSum=1.074;DP=41;ExcessHet=3.0103;FS=5.348;MLEAC=1;MLEAF=0.500;MQ=60.00;MQRankSum=0.000;QD=7.45;ReadPosRankSum=2.055;SOR=1.586	GT:AD:DP:GQ:PL	0/1:31,10:41:99:313,0,1237	4	3.46187	3.46022	0.901201	3.13284	3.19197	3.9514
d225041	Ib	CSN4	FBgn0027054	1	2R:7973697	0.384615	2R	7973697	A	G	AG	TRUE	13	138.6	AC=1;AF=0.500;AN=2;BaseQRankSum=3.361;DP=13;ExcessHet=3.0103;FS=0.000;MLEAC=1;MLEAF=0.500;MQ=60.00;MQRankSum=0.000;QD=10.66;ReadPosRankSum=0.355;SOR=0.582	GT:AD:DP:GQ:PL	0/1:8,5:13:99:146,0,222	4	2.71701	2.92813	0.927838	3.57475	3.3122	3.9514
d225041	Ib	Uba1	FBgn0023143	-1	2R:9688858	0.6	2R	9688858	T	C	AG	TRUE	45	837.6	AC=1;AF=0.500;AN=2;BaseQRankSum=4.428;DP=45;ExcessHet=3.0103;FS=11.996;MLEAC=1;MLEAF=0.500;MQ=60.00;MQRankSum=0.000;QD=18.61;ReadPosRankSum=1.335;SOR=0.090	GT:AD:DP:GQ:PL	0/1:18,27:45:99:845,0,463	4	4.58023	4.88416	0.433921	3.14724	3.06775	3.9514
d225041	Ib	Pka-R2	FBgn0022382	-1	2R:9994533	0.454545	2R	9994533	T	C	AG	TRUE	11	147.6	AC=1;AF=0.500;AN=2;BaseQRankSum=3.067;DP=11;ExcessHet=3.0103;FS=0.000;MLEAC=1;MLEAF=0.500;MQ=60.00;MQRankSum=0.000;QD=13.42;ReadPosRankSum=0.624;SOR=1.022	GT:AD:DP:GQ:PL	0/1:6,5:11:99:155,0,150	4	4.61114	4.8641	0.950267	2.30218	2.12679	3.9514
d225041	Ib	CycT	FBgn0025455	-1	3L:17552190	0.272727	3L	17552190	T	C	AG	TRUE	22	175.6	AC=1;AF=0.500;AN=2;BaseQRankSum=0.154;DP=22;ExcessHet=3.0103;FS=4.545;MLEAC=1;MLEAF=0.500;MQ=60.00;MQRankSum=0.000;QD=7.98;ReadPosRankSum=-2.189;SOR=1.911	GT:AD:DP:GQ:PL	0/1:16,6:22:99:183,0,619	4	2.71845	3.20759	0.634828	1.54592	1.36132	3.9514
d225041	Ib	Eip75B	FBgn0000568	-1	3L:17953359	0.107143	3L	17953359	T	C	AG	TRUE	57	59.6	AC=1;AF=0.500;AN=2;BaseQRankSum=4.073;DP=57;ExcessHet=3.0103;FS=7.888;MLEAC=1;MLEAF=0.500;MQ=60.00;MQRankSum=0.000;QD=1.06;ReadPosRankSum=-2.252;SOR=2.690	GT:AD:DP:GQ:PL	0/1:50,6:56:67:67,0,1370	4	4.22597	5.09412	0.0543597	2.85957	2.22453	3.9514
d225041	Ib	Rim	FBgn0053547	-1	3R:17881419	1	3R	17881419	T	C	AG	TRUE	18	796.03	AC=2;AF=1.00;AN=2;DP=18;ExcessHet=3.0103;FS=0.000;MLEAC=2;MLEAF=1.00;MQ=60.00;QD=27.13;SOR=0.914	GT:AD:DP:GQ:PL	1/1:0,18:18:54:810,54,0	4	4.71591	5.64873	0.00358477	0.0869337	0.149501	3.9514
d225041	Ib	Rim	FBgn0053547	-1	3R:17881420	1	3R	17881420	T	C	AG	TRUE	18	796.03	AC=2;AF=1.00;AN=2;DP=18;ExcessHet=3.0103;FS=0.000;MLEAC=2;MLEAF=1.00;MQ=60.00;QD=26.12;SOR=0.914	GT:AD:DP:GQ:PL	1/1:0,18:18:54:810,54,0	4	4.71591	5.64873	0.00358477	0.0869337	0.149501	3.9514
d225041	Ib	Cow	FBgn0039054	-1	3R:23112549	0.928571	3R	23112549	T	C	AG	TRUE	14	445.49	AC=2;AF=1.00;AN=2;BaseQRankSum=1.866;DP=14;ExcessHet=3.0103;FS=0.000;MLEAC=1;MLEAF=0.500;MQ=60.00;MQRankSum=0.000;QD=31.82;ReadPosRankSum=1.529;SOR=0.693	GT:AD:DP:GQ:PL	1/1:1,13:14:10:459,10,0	4	6.07048	6.14794	0.757327	0.0371922	0.0664222	3.9514
d225041	Ib	ATPsynCF6	FBgn0016119	-1	3R:23355357	0.633803	3R	23355357	T	C	AG	TRUE	71	1341.6	AC=1;AF=0.500;AN=2;BaseQRankSum=4.474;DP=71;ExcessHet=3.0103;FS=0.000;MLEAC=1;MLEAF=0.500;MQ=60.00;MQRankSum=0.000;QD=18.90;ReadPosRankSum=0.217;SOR=0.665	GT:AD:DP:GQ:PL	0/1:26,45:71:99:1349,0,631	4	9.01907	8.99728	0.563116	8.34196	8.52202	3.9514
d225041	Ib	Rpt5	FBgn0028684	1	3R:23754573	0.1875	3R	23754573	A	G	AG	TRUE	16	79.6	AC=1;AF=0.500;AN=2;BaseQRankSum=0.888;DP=16;ExcessHet=3.0103;FS=2.769;MLEAC=1;MLEAF=0.500;MQ=60.00;MQRankSum=0.000;QD=4.98;ReadPosRankSum=0.068;SOR=1.609	GT:AD:DP:GQ:PL	0/1:13,3:16:87:87,0,537	4	5.93216	6.10852	0.925004	5.71526	5.18509	3.9514
d225041	Ib	Pli	FBgn0025574	-1	3R:23889787	0.526316	3R	23889787	T	C	AG	TRUE	114	1733.6	AC=1;AF=0.500;AN=2;BaseQRankSum=4.922;DP=114;ExcessHet=3.0103;FS=0.691;MLEAC=1;MLEAF=0.500;MQ=60.00;MQRankSum=0.000;QD=15.21;ReadPosRankSum=-0.953;SOR=0.618	GT:AD:DP:GQ:PL	0/1:54,60:114:99:1741,0,1455	4	2.52098	3.01329	0.738494	2.01983	2.035	3.9514
d225041	Ib	Gdh	FBgn0001098	-1	3R:23936205	0.4	3R	23936205	T	C	AG	TRUE	35	389.6	AC=1;AF=0.500;AN=2;BaseQRankSum=3.634;DP=35;ExcessHet=3.0103;FS=0.000;MLEAC=1;MLEAF=0.500;MQ=60.00;MQRankSum=0.000;QD=11.13;ReadPosRankSum=1.315;SOR=0.656	GT:AD:DP:GQ:PL	0/1:21,14:35:99:397,0,579	4	6.73636	5.26871	0.00814535	4.37474	4.57326	3.9514
d225041	Ib	Miro	FBgn0039140	-1	3R:24038423	0.666667	3R	24038423	T	C	AG	TRUE	30	563.6	AC=1;AF=0.500;AN=2;BaseQRankSum=1.735;DP=30;ExcessHet=3.0103;FS=11.301;MLEAC=1;MLEAF=0.500;MQ=60.00;MQRankSum=0.000;QD=18.79;ReadPosRankSum=0.200;SOR=0.037	GT:AD:DP:GQ:PL	0/1:10,20:30:99:571,0,247	4	1.83471	1.66174	0.931822	1.477	1.35055	3.9514
d225041	Ib	slo	FBgn0003429	1	3R:24708329	1	3R	24708329	A	G	AG	TRUE	21	728.03	AC=2;AF=1.00;AN=2;DP=21;ExcessHet=3.0103;FS=0.000;MLEAC=2;MLEAF=1.00;MQ=60.00;QD=34.67;SOR=0.990	GT:AD:DP:GQ:PL	1/1:0,21:21:63:742,63,0	4	3.31874	4.49559	0.310436	1.1716	0.687207	3.9514
d225041	Ib	slo	FBgn0003429	1	3R:24708356	1	3R	24708356	A	G	AG	TRUE	13	460.02	AC=2;AF=1.00;AN=2;DP=13;ExcessHet=3.0103;FS=0.000;MLEAC=2;MLEAF=1.00;MQ=60.00;QD=30.98;SOR=0.836	GT:AD:DP:GQ:PL	1/1:0,13:13:39:474,39,0	4	3.31874	4.49559	0.310436	1.1716	0.687207	3.9514
d225041	Ib	Ald1	FBgn0000064	-1	3R:26254245	0.333333	3R	26254245	T	C	AG	TRUE	15	122.6	AC=1;AF=0.500;AN=2;BaseQRankSum=1.081;DP=15;ExcessHet=3.0103;FS=2.216;MLEAC=1;MLEAF=0.500;MQ=60.00;MQRankSum=0.000;QD=8.17;ReadPosRankSum=1.718;SOR=1.432	GT:AD:DP:GQ:PL	0/1:10,5:15:99:130,0,279	4	11.4026	10.0568	0.0414265	10.8637	11.1339	3.9514
d225041	Ib	TfIIA-L	FBgn0011289	1	3R:27255644	0.64	3R	27255644	A	G	AG	TRUE	25	472.6	AC=1;AF=0.500;AN=2;BaseQRankSum=2.669;DP=25;ExcessHet=3.0103;FS=0.000;MLEAC=1;MLEAF=0.500;MQ=60.00;MQRankSum=0.000;QD=18.90;ReadPosRankSum=0.549;SOR=0.999	GT:AD:DP:GQ:PL	0/1:9,16:25:99:480,0,223	4	2.98054	3.12474	0.877624	2.55085	2.08212	3.9514
d225041	Ib	Gp93	FBgn0039562	1	3R:27951705	0.638889	3R	27951705	A	G	AG	TRUE	36	885.6	AC=1;AF=0.500;AN=2;BaseQRankSum=2.145;DP=36;ExcessHet=3.0103;FS=0.000;MLEAC=1;MLEAF=0.500;MQ=60.00;MQRankSum=0.000;QD=24.60;ReadPosRankSum=0.838;SOR=0.582	GT:AD:DP:GQ:PL	0/1:13,23:36:99:893,0,729	4	5.46458	5.53278	0.962357	2.74479	2.53149	3.9514
d225041	Ib	beag	FBgn0037660	-1	3R:9063537	0.454545	3R	9063537	T	C	AG	TRUE	11	184.6	AC=1;AF=0.500;AN=2;BaseQRankSum=-0.332;DP=11;ExcessHet=3.0103;FS=2.632;MLEAC=1;MLEAF=0.500;MQ=60.00;MQRankSum=0.000;QD=16.78;ReadPosRankSum=-0.461;SOR=1.981	GT:AD:DP:GQ:PL	0/1:6,5:11:99:192,0,971	4	1.54635	1.3782	0.945538	1.39988	1.21946	3.9514
d225041	Ib	Frq1	FBgn0030897	1	X:18170126	0.318182	X	18170126	A	G	AG	TRUE	66	687.6	AC=1;AF=0.500;AN=2;BaseQRankSum=3.642;DP=66;ExcessHet=3.0103;FS=2.426;MLEAC=1;MLEAF=0.500;MQ=60.00;MQRankSum=0.000;QD=10.42;ReadPosRankSum=1.685;SOR=0.362	GT:AD:DP:GQ:PL	0/1:45,21:66:99:695,0,1306	4	6.87486	6.93852	0.801616	0.138615	0.135627	3.9514
d225041	Ib	DIP1	FBgn0024807	-1	X:21629725	0.810345	X	21629725	T	C	AG	TRUE	58	1430.6	AC=1;AF=0.500;AN=2;BaseQRankSum=1.550;DP=58;ExcessHet=3.0103;FS=7.488;MLEAC=1;MLEAF=0.500;MQ=60.00;MQRankSum=0.000;QD=24.67;ReadPosRankSum=0.517;SOR=0.148	GT:AD:DP:GQ:PL	0/1:11,47:58:99:1438,0,171	4	4.22571	4.66995	0.917906	1.90808	1.68313	3.9514
d225041	Ib	DIP1	FBgn0024807	-1	X:21629727	0.566667	X	21629727	T	C	AG	TRUE	60	993.6	AC=1;AF=0.500;AN=2;BaseQRankSum=2.405;DP=60;ExcessHet=3.0103;FS=1.001;MLEAC=1;MLEAF=0.500;MQ=60.00;MQRankSum=0.000;QD=16.56;ReadPosRankSum=-2.160;SOR=0.567	GT:AD:DP:GQ:PL	0/1:26,34:60:99:1001,0,659	4	4.22571	4.66995	0.917906	1.90808	1.68313	3.9514
d225041	Ib	Vap33	FBgn0029687	1	X:3953264	0.217391	X	3953264	A	G	AG	TRUE	23	114.6	AC=1;AF=0.500;AN=2;BaseQRankSum=3.372;DP=23;ExcessHet=3.0103;FS=0.000;MLEAC=1;MLEAF=0.500;MQ=60.00;MQRankSum=0.000;QD=4.98;ReadPosRankSum=2.173;SOR=1.034	GT:AD:DP:GQ:PL	0/1:18,5:23:99:122,0,518	4	6.63427	6.82411	0.460294	4.36447	3.97039	3.9514
d225041	Ib	cm	FBgn0000330	-1	X:7010059	1	X	7010059	T	C	AG	TRUE	12	400.02	AC=2;AF=1.00;AN=2;DP=12;ExcessHet=3.0103;FS=0.000;MLEAC=2;MLEAF=1.00;MQ=60.00;QD=33.34;SOR=1.981	GT:AD:DP:GQ:PL	1/1:0,12:12:36:414,36,0	4	2.04321	2.6628	0.700202	1.12316	1.02694	3.9514
d225042	Ib	Pex19	FBgn0032407	1	2L:12094295	1	2L	12094295	A	G	AG	TRUE	23	974.03	AC=2;AF=1.00;AN=2;DP=23;ExcessHet=3.0103;FS=0.000;MLEAC=2;MLEAF=1.00;MQ=60.00;QD=29.33;SOR=0.963	GT:AD:DP:GQ:PL	1/1:0,23:23:69:988,69,0	4	5.52679	4.58011	0.198542	3.35329	3.35545	0
d225042	Ib	CG16974	FBgn0032479	-1	2L:13189312	0.633333	2L	13189312	T	C	AG	TRUE	30	593.6	AC=1;AF=0.500;AN=2;BaseQRankSum=3.316;DP=30;ExcessHet=3.0103;FS=3.713;MLEAC=1;MLEAF=0.500;MQ=60.00;MQRankSum=0.000;QD=19.79;ReadPosRankSum=-0.692;SOR=1.721	GT:AD:DP:GQ:PL	0/1:11,19:30:99:601,0,255	4	3.8107	3.63081	0.755289	1.61977	1.51626	0
d225042	Ib	nAChRalpha5	FBgn0028875	1	2L:14083516	1	2L	14083516	A	G	AG	TRUE	17	794.03	AC=2;AF=1.00;AN=2;DP=17;ExcessHet=3.0103;FS=0.000;MLEAC=2;MLEAF=1.00;MQ=60.00;QD=26.31;SOR=1.371	GT:AD:DP:GQ:PL	1/1:0,17:17:54:808,54,0	4	2.17311	2.13145	0.632364	0.0571794	0.030452	0
d225042	Ib	nAChRalpha5	FBgn0028875	1	2L:14083517	1	2L	14083517	A	G	AG	TRUE	18	794.03	AC=2;AF=1.00;AN=2;DP=18;ExcessHet=3.0103;FS=0.000;MLEAC=2;MLEAF=1.00;MQ=60.00;QD=30.11;SOR=1.493	GT:AD:DP:GQ:PL	1/1:0,18:18:54:808,54,0	4	2.17311	2.13145	0.632364	0.0571794	0.030452	0
d225042	Ib	CG9662	FBgn0031529	-1	2L:3375848	1	2L	3375848	T	C	AG	TRUE	28	818.03	AC=2;AF=1.00;AN=2;DP=28;ExcessHet=3.0103;FS=0.000;MLEAC=2;MLEAF=1.00;MQ=60.00;QD=34.08;SOR=0.859	GT:AD:DP:GQ:PL	1/1:0,24:24:73:832,73,0	4	4.79971	4.26303	0.58721	2.25071	2.37554	0
d225042	Ib	Proc	FBgn0045038	-1	2L:7865825	1	2L	7865825	T	C	AG	TRUE	114	3799.03	AC=2;AF=1.00;AN=2;DP=114;ExcessHet=3.0103;FS=0.000;MLEAC=2;MLEAF=1.00;MQ=60.00;QD=33.32;SOR=0.841	GT:AD:DP:GQ:PL	1/1:0,114:114:99:3813,340,0	4	9.63479	10.5226	2.51921e-05	0.0321158	0.203318	0
d225042	Ib	Akap200	FBgn0027932	1	2L:8415798	0.95122	2L	8415798	A	G	AG	TRUE	41	1257.03	AC=2;AF=1.00;AN=2;BaseQRankSum=1.464;DP=41;ExcessHet=3.0103;FS=0.000;MLEAC=2;MLEAF=1.00;MQ=60.00;MQRankSum=0.000;QD=30.66;ReadPosRankSum=1.065;SOR=2.352	GT:AD:DP:GQ:PL	1/1:2,39:41:57:1271,57,0	4	7.14929	7.38323	0.779992	2.49923	2.83286	0
d225042	Ib	Nckx30C	FBgn0028704	-1	2L:9717614	1	2L	9717614	T	C	AG	TRUE	37	1214.03	AC=2;AF=1.00;AN=2;DP=37;ExcessHet=3.0103;FS=0.000;MLEAC=2;MLEAF=1.00;MQ=60.00;QD=32.81;SOR=1.121	GT:AD:DP:GQ:PL	1/1:0,37:37:99:1228,111,0	4	4.99389	4.09503	0.0412382	0.0832012	0.108464	0
d225042	Ib	nAChRalpha6	FBgn0032151	-1	2L:9809297	1	2L	9809297	T	C	AG	TRUE	21	717.03	AC=2;AF=1.00;AN=2;DP=21;ExcessHet=3.0103;FS=0.000;MLEAC=2;MLEAF=1.00;MQ=60.00;QD=34.14;SOR=4.712	GT:AD:DP:GQ:PL	1/1:0,21:21:63:731,63,0	4	4.50738	3.70086	0.0554371	0.126891	0.109016	0
d225042	Ib	nAChRalpha6	FBgn0032151	-1	2L:9809349	1	2L	9809349	T	C	AG	TRUE	27	1175.03	AC=2;AF=1.00;AN=2;DP=27;ExcessHet=3.0103;FS=0.000;MLEAC=2;MLEAF=1.00;MQ=60.00;QD=31.66;SOR=5.211	GT:AD:DP:GQ:PL	1/1:0,27:27:81:1189,81,0	4	4.50738	3.70086	0.0554371	0.126891	0.109016	0
d225042	Ib	nAChRalpha6	FBgn0032151	-1	2L:9809350	1	2L	9809350	T	C	AG	TRUE	27	1175.03	AC=2;AF=1.00;AN=2;DP=27;ExcessHet=3.0103;FS=0.000;MLEAC=2;MLEAF=1.00;MQ=60.00;QD=28.14;SOR=5.211	GT:AD:DP:GQ:PL	1/1:0,27:27:81:1189,81,0	4	4.50738	3.70086	0.0554371	0.126891	0.109016	0
d225042	Ib	RpS15Ab	FBgn0033555	1	2R:10822219	0.142857	2R	10822219	A	G	AG	TRUE	15	37.6	AC=1;AF=0.500;AN=2;BaseQRankSum=0.276;DP=15;ExcessHet=3.0103;FS=3.358;MLEAC=1;MLEAF=0.500;MQ=60.00;MQRankSum=0.000;QD=2.69;ReadPosRankSum=0.650;SOR=2.258	GT:AD:DP:GQ:PL	0/1:12,2:14:45:45,0,468	4	3.76529	3.1313	0.134754	5.69163	5.75158	0
d225042	Ib	Gmppa	FBgn0034035	-1	2R:15677332	1	2R	15677332	T	C	AG	TRUE	29	1000.03	AC=2;AF=1.00;AN=2;DP=29;ExcessHet=3.0103;FS=0.000;MLEAC=2;MLEAF=1.00;MQ=60.00;QD=34.48;SOR=2.226	GT:AD:DP:GQ:PL	1/1:0,29:29:87:1014,87,0	4	2.13825	1.80404	0.769491	1.54195	1.7944	0
d225042	Ib	CG30116	FBgn0028496	-1	2R:18457250	0.247191	2R	18457250	T	C	AG	TRUE	89	438.6	AC=1;AF=0.500;AN=2;BaseQRankSum=1.902;DP=89;ExcessHet=3.0103;FS=19.496;MLEAC=1;MLEAF=0.500;MQ=60.00;MQRankSum=0.000;QD=4.93;ReadPosRankSum=-0.220;SOR=1.098	GT:AD:DP:GQ:PL	0/1:67,22:89:99:446,0,2584	4	2.05783	0.888285	0.000330328	0.132941	0.0831169	0
d225042	Ib	Vha16-1	FBgn0262736	-1	2R:6626171	0.340426	2R	6626171	T	C	AG	TRUE	47	440.6	AC=1;AF=0.500;AN=2;BaseQRankSum=3.468;DP=47;ExcessHet=3.0103;FS=6.867;MLEAC=1;MLEAF=0.500;MQ=60.00;MQRankSum=0.000;QD=9.37;ReadPosRankSum=0.811;SOR=0.173	GT:AD:DP:GQ:PL	0/1:31,16:47:99:448,0,921	4	8.42356	8.78145	0.297901	6.11325	6.08202	0
d225042	Ib	Lpin	FBgn0263593	-1	2R:8143056	0.731707	2R	8143056	T	C	AG	TRUE	41	881.6	AC=1;AF=0.500;AN=2;BaseQRankSum=2.241;DP=41;ExcessHet=3.0103;FS=0.000;MLEAC=1;MLEAF=0.500;MQ=60.00;MQRankSum=0.000;QD=21.50;ReadPosRankSum=-1.610;SOR=0.665	GT:AD:DP:GQ:PL	0/1:11,30:41:99:889,0,184	4	4.39667	5.07773	0.241101	2.14187	1.82211	0
d225042	Ib	CG1902	FBgn0033434	1	2R:9604115	0.634146	2R	9604115	A	G	AG	TRUE	41	794.6	AC=1;AF=0.500;AN=2;BaseQRankSum=3.889;DP=41;ExcessHet=3.0103;FS=7.121;MLEAC=1;MLEAF=0.500;MQ=60.00;MQRankSum=0.000;QD=19.38;ReadPosRankSum=0.082;SOR=1.658	GT:AD:DP:GQ:PL	0/1:15,26:41:99:802,0,352	4	4.22058	3.69211	0.700445	1.77674	1.66021	0
d225042	Ib	Uba1	FBgn0023143	-1	2R:9688858	0.464286	2R	9688858	T	C	AG	TRUE	57	666.6	AC=1;AF=0.500;AN=2;BaseQRankSum=3.096;DP=57;ExcessHet=3.0103;FS=1.147;MLEAC=1;MLEAF=0.500;MQ=60.00;MQRankSum=0.000;QD=11.90;ReadPosRankSum=-1.396;SOR=0.527	GT:AD:DP:GQ:PL	0/1:30,26:56:99:674,0,635	4	4.58023	4.88416	0.433921	3.14724	3.06775	0
d225042	Ib	Ciz1	FBgn0027567	1	3L:9867339	0.923077	3L	9867339	A	G	AG	TRUE	13	365.44	AC=2;AF=1.00;AN=2;BaseQRankSum=0.708;DP=13;ExcessHet=3.0103;FS=0.000;MLEAC=1;MLEAF=0.500;MQ=60.00;MQRankSum=0.000;QD=28.11;ReadPosRankSum=-1.213;SOR=0.368	GT:AD:DP:GQ:PL	1/1:1,12:13:3:375,3,0	4	3.95852	3.57428	0.813704	1.37711	1.11417	0
d225042	Ib	Xrp1	FBgn0261113	1	3R:18918354	1	3R	18918354	A	G	AG	TRUE	44	1486.03	AC=2;AF=1.00;AN=2;DP=44;ExcessHet=3.0103;FS=0.000;MLEAC=2;MLEAF=1.00;MQ=60.00;QD=33.77;SOR=2.885	GT:AD:DP:GQ:PL	1/1:0,44:44:99:1500,132,0	4	6.93525	6.63308	0.99582	5.49922	5.49918	0
d225042	Ib	vib	FBgn0267975	-1	3R:19226523	0.609756	3R	19226523	T	C	AG	TRUE	41	650.6	AC=1;AF=0.500;AN=2;BaseQRankSum=1.737;DP=41;ExcessHet=3.0103;FS=6.673;MLEAC=1;MLEAF=0.500;MQ=60.00;MQRankSum=0.000;QD=15.87;ReadPosRankSum=-0.067;SOR=0.120	GT:AD:DP:GQ:PL	0/1:16,25:41:99:658,0,326	4	5.02601	5.14846	0.946513	3.41525	3.2449	0
[truncated: 11,234 more rows]
