# Supplementary material for: A stochastic RNA editing process targets a select number of sites in individual Drosophila glutamatergic motoneurons
Source: bioRxiv preprint, doi:10.1101/2024.05.17.594696, version 2 (2025-07-01)
Supplement: Supplemental Table 3 [file 594696_file05.xlsx]

## Sheet: Column descriptions
Column Title	Description
CellID	A unique identifying number given to each cell sequenced
CellType	Either Ib, Is, or M (muscle)
Gene	Name of gene
FlybaseID	The Flybase ID of the gene
DNAstrand	DNA strand upon which the gene is located
Edit Position	Position of the edit in the genome, formatted as chromosome:position
FractionOfReadsEdited	Fraction of reads at this site which did not match the genomic DNA sequence
CHROM	The chromosome this edit is located in
POS	The numerical position along the chromosome this edit is located at.
REF	The reference DNA base at this position from the drosophila reference genome
ALT	The alternative (RNA edited) base detected in RNA sequencing
BiologicalBaseChange	Because some genes are located on the minus DNA strand but RNA sequencing aligns to the plus DNA strand, edits on the minus strand need to find their complement to understand the correct effect the edit will have on the RNA produced. This column shows the true biological base change that will be found in the RNA.
Canonical	True means the biological effect of the edit is A-to-G. False means not A-to-G.
Depth	Read depth at this site (pulled from "DP" field in the INFO column for easy access)
QUAL	A measure of the quality of the variant call based on quality of reads at this site (output of samtools/GATK variant calls)
INFO	Information about the current edit (output of samtools/GATK variant calls)
FORMAT	Format for the "details" column, where each set of numbers is delimited by a colon (output of samtools/GATK variant calls). For example, the first output is GT (genotype), which is either 0/1,0/0,or1/1 in the details column.
DETAILS	Details about the variant (output of samtools/GATK variant calls)
Filter	A measure of which cumulative filters this edit passed during processing steps. 1 means minimum depth was over 10 reads. 2 means minimum quality was over 20. 3 means minimum editing rate was >0.1. 4 means at least 10 Ib or Is cells had this edit. Filters are applied 1-->2-->3-->4 so if an edit says Filter=3, that means it passed filter 3 but not filter 4.
Gene TPM in Ib	Expression level of gene in Ib cells, expressed in transcripts per million. Numbers from Jetti et al, 2023.
Gene TPM in Is	Expression level of gene in Is cells, expressed in transcripts per million. Numbers from Jetti et al, 2023.
Gene TPM adj pval	The p-value (adjusted for multiple tests) comparing expression level of the gene between Ib and Is. Numbers from Jetti et al, 2023.
Gene TPM in M1	Expression level of gene in muscle 1 cells, expressed in transcripts per million. Numbers from Jetti et al, 2023.
Gene TPM in M4	Expression level of gene in muscle 4 cells, expressed in transcripts per million. Numbers from Jetti et al, 2023.
ADAR TPM	Transcripts per million of ADAR mRNA detected in the current cell

## Sheet: Sheet1
CellID	CellType	Gene	FlybaseID	DNAstrand	Edit Position	FractionOfReadsEdited	CHROM	POS	REF	ALT	BiologicalBaseChange	Canonical	Depth	QUAL	INFO	FORMAT	DETAILS	Filter	Gene TPM in Ib	Gene TPM in Is	Gene TPM adj pval	Gene TPM in M1	Gene TPM in M4	ADAR TPM
d225003	Ib	CG31717	FBgn0051717	1	2L:10251648	1	2L	10251648	G	A	GA	FALSE	134	5313.03	AC=2;AF=1.00;AN=2;DP=134;ExcessHet=3.0103;FS=0.000;MLEAC=2;MLEAF=1.00;MQ=60.00;QD=28.83;SOR=4.047	GT:AD:DP:GQ:PL	1/1:0,134:134:99:5327,403,0	4	6.16276	6.94588	0.0485892	6.29343	5.52658	0
d225003	Ib	CG33303	FBgn0053303	-1	2L:10374282	0.181818	2L	10374282	A	T	TA	FALSE	209	521.6	AC=1;AF=0.500;AN=2;BaseQRankSum=-5.510;DP=209;ExcessHet=3.0103;FS=2.130;MLEAC=1;MLEAF=0.500;MQ=60.00;MQRankSum=0.000;QD=2.50;ReadPosRankSum=1.209;SOR=0.929	GT:AD:DP:GQ:PL	0/1:171,38:209:99:529,0,4954	4	4.82255	3.93282	0.505552	2.43097	2.84372	0
d225003	Ib	CG4577	FBgn0031306	1	2L:1140621	0.103226	2L	1140621	T	A	TA	FALSE	155	80.6	AC=1;AF=0.500;AN=2;BaseQRankSum=-1.411;DP=155;ExcessHet=3.0103;FS=12.080;MLEAC=1;MLEAF=0.500;MQ=60.00;MQRankSum=0.000;QD=0.52;ReadPosRankSum=-3.774;SOR=2.025	GT:AD:DP:GQ:PL	0/1:139,16:155:88:88,0,4210	4	5.85538	5.05184	0.659084	0.404889	0.874998	0
d225003	Ib	ThrRS	FBgn0027081	1	2L:12105826	0.123457	2L	12105826	C	T	CT	FALSE	81	96.6	AC=1;AF=0.500;AN=2;BaseQRankSum=-2.920;DP=81;ExcessHet=3.0103;FS=7.613;MLEAC=1;MLEAF=0.500;MQ=60.00;MQRankSum=0.000;QD=1.19;ReadPosRankSum=0.101;SOR=1.514	GT:AD:DP:GQ:PL	0/1:71,10:81:99:104,0,2202	4	5.11791	5.14664	0.914631	2.22626	2.05694	0
d225003	Ib	ThrRS	FBgn0027081	1	2L:12106174	0.115942	2L	12106174	T	C	TC	FALSE	69	97.6	AC=1;AF=0.500;AN=2;BaseQRankSum=4.727;DP=69;ExcessHet=3.0103;FS=0.000;MLEAC=1;MLEAF=0.500;MQ=60.00;MQRankSum=0.000;QD=1.41;ReadPosRankSum=0.310;SOR=0.662	GT:AD:DP:GQ:PL	0/1:61,8:69:99:105,0,1746	4	5.11791	5.14664	0.914631	2.22626	2.05694	0
d225003	Ib	Rab6	FBgn0015797	-1	2L:12108881	1	2L	12108881	T	A	AT	FALSE	186	5577.03	AC=2;AF=1.00;AN=2;DP=186;ExcessHet=3.0103;FS=0.000;MLEAC=2;MLEAF=1.00;MQ=60.00;QD=29.98;SOR=1.313	GT:AD:DP:GQ:PL	1/1:0,186:186:99:5591,551,0	4	5.65149	5.3903	0.997475	2.97474	2.86663	0
d225003	Ib	CG16974	FBgn0032479	-1	2L:13189517	0.247826	2L	13189517	C	G	GC	FALSE	460	2421.6	AC=1;AF=0.500;AN=2;BaseQRankSum=-2.860;DP=460;ExcessHet=3.0103;FS=1.310;MLEAC=1;MLEAF=0.500;MQ=60.00;MQRankSum=0.000;QD=5.26;ReadPosRankSum=0.129;SOR=0.562	GT:AD:DP:GQ:PL	0/1:346,114:460:99:2429,0,10977	4	3.8107	3.63081	0.755289	1.61977	1.51626	0
d225003	Ib	Pect	FBgn0032482	1	2L:13209737	1	2L	13209737	C	T	CT	FALSE	221	7250.03	AC=2;AF=1.00;AN=2;DP=221;ExcessHet=3.0103;FS=0.000;MLEAC=2;MLEAF=1.00;MQ=60.00;QD=32.81;SOR=3.030	GT:AD:DP:GQ:PL	1/1:0,221:221:99:7264,661,0	4	5.36314	5.70097	0.992665	2.09269	1.92921	0
d225003	Ib	RpL24	FBgn0032518	-1	2L:13394241	0.441379	2L	13394241	C	T	GA	FALSE	439	5195.6	AC=1;AF=0.500;AN=2;BaseQRankSum=-13.767;DP=439;ExcessHet=3.0103;FS=0.000;MLEAC=1;MLEAF=0.500;MQ=60.00;MQRankSum=0.000;QD=11.94;ReadPosRankSum=0.606;SOR=0.690	GT:AD:DP:GQ:PL	0/1:243,192:435:99:5203,0,7831	4	11.1577	11.3686	0.00168671	10.7441	10.5771	0
d225003	Ib	EndoGI	FBgn0028515	1	2L:16259024	1	2L	16259024	A	T	AT	FALSE	50	1551.03	AC=2;AF=1.00;AN=2;DP=50;ExcessHet=3.0103;FS=0.000;MLEAC=2;MLEAF=1.00;MQ=60.00;QD=31.02;SOR=4.977	GT:AD:DP:GQ:PL	1/1:0,50:50:99:1565,149,0	4	3.83455	3.62902	0.689888	4.47696	4.36368	0
d225003	Ib	nrv3	FBgn0032946	1	2L:21380190	0.793103	2L	21380190	C	G	CG	FALSE	31	722.6	AC=1;AF=0.500;AN=2;BaseQRankSum=-2.579;DP=31;ExcessHet=3.0103;FS=0.000;MLEAC=1;MLEAF=0.500;MQ=60.00;MQRankSum=0.000;QD=24.92;ReadPosRankSum=-2.065;SOR=1.179	GT:AD:DP:GQ:PL	0/1:6,23:29:99:730,0,124	4	9.98583	9.36114	0.242839	0.270495	0.683618	0
d225003	Ib	CG9662	FBgn0031529	-1	2L:3376197	1	2L	3376197	G	A	CT	FALSE	123	4121.03	AC=2;AF=1.00;AN=2;DP=123;ExcessHet=3.0103;FS=0.000;MLEAC=2;MLEAF=1.00;MQ=60.00;QD=33.50;SOR=0.848	GT:AD:DP:GQ:PL	1/1:0,123:123:99:4135,369,0	4	4.79971	4.26303	0.58721	2.25071	2.37554	0
d225003	Ib	CG9662	FBgn0031529	-1	2L:3376230	1	2L	3376230	C	G	GC	FALSE	116	4877.03	AC=2;AF=1.00;AN=2;DP=116;ExcessHet=3.0103;FS=0.000;MLEAC=2;MLEAF=1.00;MQ=60.00;QD=34.46;SOR=1.140	GT:AD:DP:GQ:PL	1/1:0,116:116:99:4891,354,0	4	4.79971	4.26303	0.58721	2.25071	2.37554	0
d225003	Ib	CG9662	FBgn0031529	-1	2L:3376254	1	2L	3376254	A	G	TC	FALSE	156	6403.03	AC=2;AF=1.00;AN=2;DP=156;ExcessHet=3.0103;FS=0.000;MLEAC=2;MLEAF=1.00;MQ=60.00;QD=28.77;SOR=0.772	GT:AD:DP:GQ:PL	1/1:0,156:156:99:6417,477,0	4	4.79971	4.26303	0.58721	2.25071	2.37554	0
d225003	Ib	Thor	FBgn0261560	1	2L:3479300	0.661664	2L	3479300	C	A	CA	FALSE	733	14000.6	AC=1;AF=0.500;AN=2;BaseQRankSum=-12.704;DP=733;ExcessHet=3.0103;FS=0.000;MLEAC=1;MLEAF=0.500;MQ=60.00;MQRankSum=0.000;QD=19.10;ReadPosRankSum=-1.034;SOR=0.667	GT:AD:DP:GQ:PL	0/1:248,485:733:99:14008,0,6672	4	4.02038	3.58018	0.652908	11.318	10.933	0
d225003	Ib	CG16704	FBgn0031558	-1	2L:3692202	0.549296	2L	3692202	T	G	AC	FALSE	426	6884.6	AC=1;AF=0.500;AN=2;BaseQRankSum=10.040;DP=426;ExcessHet=3.0103;FS=0.000;MLEAC=1;MLEAF=0.500;MQ=60.00;MQRankSum=0.000;QD=16.16;ReadPosRankSum=0.094;SOR=0.663	GT:AD:DP:GQ:PL	0/1:192,234:426:99:6892,0,4845	4	0.744555	1.37301	0.666738	1.68991	2.5269	0
d225003	Ib	RpL40	FBgn0003941	1	2L:4228231	0.585802	2L	4228231	G	A	GA	FALSE	1958	34149.6	AC=1;AF=0.500;AN=2;BaseQRankSum=-24.275;DP=1958;ExcessHet=3.0103;FS=3.250;MLEAC=1;MLEAF=0.500;MQ=60.00;MQRankSum=0.000;QD=17.44;ReadPosRankSum=-3.724;SOR=0.794	GT:AD:DP:GQ:PL	0/1:811,1147:1958:99:34157,0,23440	4	12.1664	12.1374	0.69258	11.4574	11.4142	0
d225003	Ib	tutl	FBgn0010473	1	2L:4320666	0.778226	2L	4320666	C	A	CA	FALSE	248	5436.6	AC=1;AF=0.500;AN=2;BaseQRankSum=-5.522;DP=248;ExcessHet=3.0103;FS=3.535;MLEAC=1;MLEAF=0.500;MQ=60.00;MQRankSum=0.000;QD=21.92;ReadPosRankSum=0.704;SOR=0.932	GT:AD:DP:GQ:PL	0/1:55,193:248:99:5444,0,1111	4	4.0959	4.22725	0.910584	0.165688	0.146746	0
d225003	Ib	fipi	FBgn0031627	-1	2L:4735074	0.387097	2L	4735074	A	T	TA	FALSE	155	2088.6	AC=1;AF=0.500;AN=2;BaseQRankSum=5.242;DP=155;ExcessHet=3.0103;FS=2.137;MLEAC=1;MLEAF=0.500;MQ=60.00;MQRankSum=0.000;QD=13.47;ReadPosRankSum=-1.132;SOR=0.914	GT:AD:DP:GQ:PL	0/1:95,60:155:99:2096,0,3647	4	5.70931	5.32823	0.250204	0.307762	0.421432	0
d225003	Ib	fipi	FBgn0031627	-1	2L:4735376	0.457143	2L	4735376	G	A	CT	FALSE	140	1634.6	AC=1;AF=0.500;AN=2;BaseQRankSum=-5.529;DP=140;ExcessHet=3.0103;FS=4.019;MLEAC=1;MLEAF=0.500;MQ=60.00;MQRankSum=0.000;QD=11.68;ReadPosRankSum=-0.436;SOR=0.430	GT:AD:DP:GQ:PL	0/1:76,64:140:99:1642,0,2380	4	5.70931	5.32823	0.250204	0.307762	0.421432	0
d225003	Ib	fipi	FBgn0031627	-1	2L:4738435	0.473684	2L	4738435	G	A	CT	FALSE	57	744.6	AC=1;AF=0.500;AN=2;BaseQRankSum=-2.066;DP=57;ExcessHet=3.0103;FS=24.592;MLEAC=1;MLEAF=0.500;MQ=60.00;MQRankSum=0.000;QD=13.06;ReadPosRankSum=2.019;SOR=1.638	GT:AD:DP:GQ:PL	0/1:30,27:57:99:752,0,872	4	5.70931	5.32823	0.250204	0.307762	0.421432	0
d225003	Ib	Rtnl1	FBgn0053113	-1	2L:5008290	0.514925	2L	5008290	G	T	CA	FALSE	134	1861.6	AC=1;AF=0.500;AN=2;BaseQRankSum=-5.213;DP=134;ExcessHet=3.0103;FS=20.747;MLEAC=1;MLEAF=0.500;MQ=60.00;MQRankSum=0.000;QD=13.89;ReadPosRankSum=-0.027;SOR=1.741	GT:AD:DP:GQ:PL	0/1:65,69:134:99:1869,0,1883	4	8.65754	8.22041	0.738348	6.20784	5.95089	0
d225003	Ib	Rtnl1	FBgn0053113	-1	2L:5009310	0.458599	2L	5009310	C	T	GA	FALSE	157	2334.6	AC=1;AF=0.500;AN=2;BaseQRankSum=-3.538;DP=157;ExcessHet=3.0103;FS=0.000;MLEAC=1;MLEAF=0.500;MQ=60.00;MQRankSum=0.000;QD=14.87;ReadPosRankSum=-0.346;SOR=0.703	GT:AD:DP:GQ:PL	0/1:85,72:157:99:2342,0,3615	4	8.65754	8.22041	0.738348	6.20784	5.95089	0
d225003	Ib	SelT	FBgn0031670	1	2L:5011196	1	2L	5011196	A	C	AC	FALSE	176	8092.03	AC=2;AF=1.00;AN=2;DP=176;ExcessHet=3.0103;FS=0.000;MLEAC=2;MLEAF=1.00;MQ=60.00;QD=29.82;SOR=0.863	GT:AD:DP:GQ:PL	1/1:0,176:176:99:8106,560,0	4	6.33383	6.84417	0.699678	5.28965	5.24848	0
d225003	Ib	CG31650	FBgn0031673	-1	2L:5040833	0.54375	2L	5040833	C	A	GT	FALSE	160	2364.6	AC=1;AF=0.500;AN=2;BaseQRankSum=-5.417;DP=160;ExcessHet=3.0103;FS=9.497;MLEAC=1;MLEAF=0.500;MQ=60.00;MQRankSum=0.000;QD=14.78;ReadPosRankSum=2.393;SOR=0.979	GT:AD:DP:GQ:PL	0/1:73,87:160:99:2372,0,2053	4	4.95708	5.02313	0.952346	2.11362	1.73761	0
d225003	Ib	ND-13A	FBgn0031684	-1	2L:5100166	1	2L	5100166	A	C	TG	FALSE	106	4756.03	AC=2;AF=1.00;AN=2;DP=106;ExcessHet=3.0103;FS=0.000;MLEAC=2;MLEAF=1.00;MQ=60.00;QD=28.23;SOR=6.053	GT:AD:DP:GQ:PL	1/1:0,106:106:99:4770,319,0	4	6.33994	6.41081	0.968898	5.04382	5.21666	0
d225003	Ib	ND-13A	FBgn0031684	-1	2L:5100167	1	2L	5100167	A	C	TG	FALSE	106	4756.03	AC=2;AF=1.00;AN=2;DP=106;ExcessHet=3.0103;FS=0.000;MLEAC=2;MLEAF=1.00;MQ=60.00;QD=31.26;SOR=6.053	GT:AD:DP:GQ:PL	1/1:0,106:106:99:4770,319,0	4	6.33994	6.41081	0.968898	5.04382	5.21666	0
d225003	Ib	CG14024	FBgn0031697	-1	2L:5312887	1	2L	5312887	G	T	CA	FALSE	63	2187.03	AC=2;AF=1.00;AN=2;DP=63;ExcessHet=3.0103;FS=0.000;MLEAC=2;MLEAF=1.00;MQ=60.00;QD=34.71;SOR=0.790	GT:AD:DP:GQ:PL	1/1:0,63:63:99:2201,189,0	4	4.1084	4.81184	0.222063	0.0890449	0.126785	0
d225003	Ib	Nhe3	FBgn0028703	-1	2L:6683793	1	2L	6683793	G	T	CA	FALSE	67	2241.03	AC=2;AF=1.00;AN=2;DP=67;ExcessHet=3.0103;FS=0.000;MLEAC=2;MLEAF=1.00;MQ=60.00;QD=33.45;SOR=0.849	GT:AD:DP:GQ:PL	1/1:0,67:67:99:2255,202,0	4	3.56007	3.997	0.544983	0.937678	1.02396	0
d225003	Ib	nrv2	FBgn0015777	-1	2L:6790466	1	2L	6790466	A	G	TC	FALSE	69	2461.03	AC=2;AF=1.00;AN=2;DP=69;ExcessHet=3.0103;FS=0.000;MLEAC=2;MLEAF=1.00;MQ=60.00;QD=31.98;SOR=1.576	GT:AD:DP:GQ:PL	1/1:0,69:69:99:2475,207,0	4	3.48474	2.11119	0.017969	1.38147	1.80436	0
d225003	Ib	Rack1	FBgn0020618	-1	2L:7825630	0.156627	2L	7825630	A	G	TC	FALSE	86	165.6	AC=1;AF=0.500;AN=2;BaseQRankSum=1.726;DP=86;ExcessHet=3.0103;FS=8.148;MLEAC=1;MLEAF=0.500;MQ=60.00;MQRankSum=0.000;QD=2.00;ReadPosRankSum=-2.762;SOR=0.045	GT:AD:DP:GQ:PL	0/1:70,13:83:99:173,0,2718	4	11.0143	10.9919	0.822681	10.3093	10.1087	0
d225003	Ib	RpS13	FBgn0010265	-1	2L:8363926	0.538462	2L	8363926	C	A	GT	FALSE	1406	20909.6	AC=1;AF=0.500;AN=2;BaseQRankSum=-22.670;DP=1406;ExcessHet=3.0103;FS=1.155;MLEAC=1;MLEAF=0.500;MQ=60.00;MQRankSum=0.000;QD=14.89;ReadPosRankSum=0.624;SOR=0.817	GT:AD:DP:GQ:PL	0/1:648,756:1404:99:20917,0,19252	4	12.5537	12.6411	0.256312	12.0036	11.9644	0
d225003	Ib	Akap200	FBgn0027932	1	2L:8430755	0.222494	2L	8430755	C	T	CT	FALSE	409	1598.6	AC=1;AF=0.500;AN=2;BaseQRankSum=-4.900;DP=409;ExcessHet=3.0103;FS=26.868;MLEAC=1;MLEAF=0.500;MQ=60.00;MQRankSum=0.000;QD=3.91;ReadPosRankSum=0.612;SOR=0.105	GT:AD:DP:GQ:PL	0/1:318,91:409:99:1606,0,9523	4	7.14929	7.38323	0.779992	2.49923	2.83286	0
d225003	Ib	Gdi	FBgn0004868	-1	2L:9494388	0.202733	2L	9494388	G	A	CT	FALSE	439	1601.6	AC=1;AF=0.500;AN=2;BaseQRankSum=-6.591;DP=439;ExcessHet=3.0103;FS=0.657;MLEAC=1;MLEAF=0.500;MQ=60.00;MQRankSum=0.000;QD=3.65;ReadPosRankSum=-0.956;SOR=0.832	GT:AD:DP:GQ:PL	0/1:350,89:439:99:1609,0,11113	4	8.05437	8.41484	0.842776	4.8483	4.88893	0
d225003	Ib	RanBPM	FBgn0262114	1	2R:10435935	1	2R	10435935	C	G	CG	FALSE	65	2747.03	AC=2;AF=1.00;AN=2;DP=65;ExcessHet=3.0103;FS=0.000;MLEAC=2;MLEAF=1.00;MQ=60.00;QD=29.61;SOR=4.648	GT:AD:DP:GQ:PL	1/1:0,65:65:99:2761,196,0	4	2.54261	3.30689	0.357887	2.3146	1.90356	0
d225003	Ib	RanBPM	FBgn0262114	1	2R:10435945	1	2R	10435945	A	C	AC	FALSE	57	2583.03	AC=2;AF=1.00;AN=2;DP=57;ExcessHet=3.0103;FS=0.000;MLEAC=2;MLEAF=1.00;MQ=60.00;QD=32.78;SOR=4.768	GT:AD:DP:GQ:PL	1/1:0,57:57:99:2597,180,0	4	2.54261	3.30689	0.357887	2.3146	1.90356	0
d225003	Ib	Galphao	FBgn0001122	1	2R:10461755	0.986301	2R	10461755	T	C	TC	FALSE	87	2420.03	AC=2;AF=1.00;AN=2;DP=87;ExcessHet=3.0103;FS=0.000;MLEAC=2;MLEAF=1.00;MQ=60.00;QD=33.15;SOR=0.840	GT:AD:DP:GQ:PL	1/1:1,72:73:99:2434,184,0	4	5.27539	5.64569	0.388493	0.648983	0.676221	0
d225003	Ib	luna	FBgn0040765	-1	2R:11106636	0.825843	2R	11106636	G	A	CT	FALSE	178	5314.6	AC=1;AF=0.500;AN=2;BaseQRankSum=-5.459;DP=178;ExcessHet=3.0103;FS=9.432;MLEAC=1;MLEAF=0.500;MQ=60.00;MQRankSum=0.000;QD=29.86;ReadPosRankSum=-1.117;SOR=0.249	GT:AD:DP:GQ:PL	0/1:31,147:178:99:5322,0,748	4	2.56231	1.58477	0.00374606	1.19796	1.18173	0
d225003	Ib	luna	FBgn0040765	-1	2R:11106661	0.793939	2R	11106661	A	T	TA	FALSE	165	4931.6	AC=1;AF=0.500;AN=2;BaseQRankSum=-1.255;DP=165;ExcessHet=3.0103;FS=7.650;MLEAC=1;MLEAF=0.500;MQ=60.00;MQRankSum=0.000;QD=29.89;ReadPosRankSum=1.599;SOR=1.371	GT:AD:DP:GQ:PL	0/1:34,131:165:99:4939,0,832	4	2.56231	1.58477	0.00374606	1.19796	1.18173	0
d225003	Ib	Prp8	FBgn0033688	-1	2R:12162508	1	2R	12162508	A	C	TG	FALSE	116	4149.03	AC=2;AF=1.00;AN=2;DP=116;ExcessHet=3.0103;FS=0.000;MLEAC=2;MLEAF=1.00;MQ=60.00;QD=29.31;SOR=1.188	GT:AD:DP:GQ:PL	1/1:0,116:116:99:4163,348,0	4	2.25265	2.28292	0.753948	0.79197	1.00345	0
d225003	Ib	Mp20	FBgn0002789	1	2R:13246672	0.972222	2R	13246672	C	G	CG	FALSE	37	964.6	AC=1;AF=0.500;AN=2;BaseQRankSum=2.090;DP=37;ExcessHet=3.0103;FS=0.000;MLEAC=1;MLEAF=0.500;MQ=60.00;MQRankSum=0.000;QD=26.79;ReadPosRankSum=0.752;SOR=2.419	GT:AD:DP:GQ:PL	0/1:1,35:36:25:972,0,25	4	7.18425	6.72376	0.949291	12.518	12.5339	0
d225003	Ib	Mp20	FBgn0002789	1	2R:13247523	0.429919	2R	13247523	C	T	CT	FALSE	746	7420.6	AC=1;AF=0.500;AN=2;BaseQRankSum=-11.442;DP=746;ExcessHet=3.0103;FS=1.928;MLEAC=1;MLEAF=0.500;MQ=60.00;MQRankSum=0.000;QD=10.00;ReadPosRankSum=-0.112;SOR=0.537	GT:AD:DP:GQ:PL	0/1:423,319:742:99:7428,0,12441	4	7.18425	6.72376	0.949291	12.518	12.5339	0
d225003	Ib	Roe1	FBgn0014877	1	2R:13555257	1	2R	13555257	T	C	TC	FALSE	130	4626.03	AC=2;AF=1.00;AN=2;DP=130;ExcessHet=3.0103;FS=0.000;MLEAC=2;MLEAF=1.00;MQ=60.00;QD=35.89;SOR=1.839	GT:AD:DP:GQ:PL	1/1:0,130:130:99:4640,390,0	4	3.29931	2.86987	0.707151	1.50769	1.83494	0
d225003	Ib	fl(2)d	FBgn0000662	-1	2R:13824501	1	2R	13824501	G	T	CA	FALSE	374	11246	AC=2;AF=1.00;AN=2;DP=374;ExcessHet=3.0103;FS=0.000;MLEAC=2;MLEAF=1.00;MQ=60.00;QD=30.07;SOR=3.599	GT:AD:DP:GQ:PL	1/1:0,374:374:99:11260,1108,0	4	2.60305	2.3359	0.329402	1.82327	1.73325	0
d225003	Ib	Prosap	FBgn0040752	-1	2R:14140343	1	2R	14140343	C	T	GA	FALSE	134	5938.03	AC=2;AF=1.00;AN=2;DP=134;ExcessHet=3.0103;FS=0.000;MLEAC=2;MLEAF=1.00;MQ=60.00;QD=30.61;SOR=1.473	GT:AD:DP:GQ:PL	1/1:0,134:134:99:5952,403,0	4	3.67189	3.09119	0.0790468	0.867644	0.923605	0
d225003	Ib	Arc1	FBgn0033926	-1	2R:14358479	0.84	2R	14358479	C	T	GA	FALSE	50	1041.6	AC=1;AF=0.500;AN=2;BaseQRankSum=-3.453;DP=50;ExcessHet=3.0103;FS=0.000;MLEAC=1;MLEAF=0.500;MQ=60.00;MQRankSum=0.000;QD=20.83;ReadPosRankSum=-1.492;SOR=1.196	GT:AD:DP:GQ:PL	0/1:8,42:50:99:1049,0,148	4	8.8001	10.4298	1.75221e-12	6.99997	7.09814	0
d225003	Ib	Arc1	FBgn0033926	-1	2R:14358573	0.837838	2R	14358573	T	G	AC	FALSE	37	962.6	AC=1;AF=0.500;AN=2;BaseQRankSum=3.300;DP=37;ExcessHet=3.0103;FS=0.000;MLEAC=1;MLEAF=0.500;MQ=60.00;MQRankSum=0.000;QD=26.02;ReadPosRankSum=-1.183;SOR=1.775	GT:AD:DP:GQ:PL	0/1:6,31:37:47:970,0,47	4	8.8001	10.4298	1.75221e-12	6.99997	7.09814	0
d225003	Ib	Arc1	FBgn0033926	-1	2R:14359830	0.372642	2R	14359830	G	A	CT	FALSE	212	1965.6	AC=1;AF=0.500;AN=2;BaseQRankSum=-3.435;DP=212;ExcessHet=3.0103;FS=1.743;MLEAC=1;MLEAF=0.500;MQ=60.00;MQRankSum=0.000;QD=9.27;ReadPosRankSum=1.250;SOR=0.832	GT:AD:DP:GQ:PL	0/1:133,79:212:99:1973,0,4023	4	8.8001	10.4298	1.75221e-12	6.99997	7.09814	0
d225003	Ib	ATPCL	FBgn0020236	-1	2R:15994473	1	2R	15994473	G	T	CA	FALSE	34	1162.03	AC=2;AF=1.00;AN=2;DP=34;ExcessHet=3.0103;FS=0.000;MLEAC=2;MLEAF=1.00;MQ=60.00;QD=34.18;SOR=1.085	GT:AD:DP:GQ:PL	1/1:0,34:34:99:1176,102,0	4	3.02082	2.76401	0.392183	2.11232	1.97778	0
d225003	Ib	Prosbeta1	FBgn0010590	-1	2R:16014304	0.542373	2R	16014304	A	G	TC	FALSE	354	5926.6	AC=1;AF=0.500;AN=2;BaseQRankSum=11.991;DP=354;ExcessHet=3.0103;FS=3.433;MLEAC=1;MLEAF=0.500;MQ=60.00;MQRankSum=0.000;QD=16.74;ReadPosRankSum=-1.877;SOR=0.876	GT:AD:DP:GQ:PL	0/1:162,192:354:99:5934,0,4267	4	7.74825	8.59438	0.615658	8.00597	7.82072	0
d225003	Ib	Dg	FBgn0034072	-1	2R:16098420	1	2R	16098420	T	A	AT	FALSE	345	14284	AC=2;AF=1.00;AN=2;DP=345;ExcessHet=3.0103;FS=0.000;MLEAC=2;MLEAF=1.00;MQ=60.00;QD=32.00;SOR=1.797	GT:AD:DP:GQ:PL	1/1:0,345:345:99:14298,1042,0	4	2.78357	3.28406	0.754072	1.38216	1.29216	0
d225003	Ib	Ric	FBgn0265605	-1	2R:16107611	1	2R	16107611	A	T	TA	FALSE	78	2625.03	AC=2;AF=1.00;AN=2;DP=78;ExcessHet=3.0103;FS=0.000;MLEAC=2;MLEAF=1.00;MQ=60.00;QD=33.65;SOR=1.329	GT:AD:DP:GQ:PL	1/1:0,78:78:99:2639,234,0	4	4.76805	4.74994	0.98195	2.18522	1.83667	0
d225003	Ib	Lis-1	FBgn0015754	1	2R:16178898	1	2R	16178898	C	G	CG	FALSE	67	2304.03	AC=2;AF=1.00;AN=2;DP=67;ExcessHet=3.0103;FS=0.000;MLEAC=2;MLEAF=1.00;MQ=60.00;QD=34.39;SOR=2.973	GT:AD:DP:GQ:PL	1/1:0,67:67:99:2318,201,0	4	5.71834	6.47378	0.450267	2.80773	2.38484	0
d225003	Ib	Lis-1	FBgn0015754	1	2R:16178923	0.97561	2R	16178923	A	T	AT	FALSE	41	1233.03	AC=2;AF=1.00;AN=2;BaseQRankSum=1.742;DP=41;ExcessHet=3.0103;FS=0.000;MLEAC=2;MLEAF=1.00;MQ=60.00;MQRankSum=0.000;QD=30.07;ReadPosRankSum=0.254;SOR=0.507	GT:AD:DP:GQ:PL	1/1:1,40:41:99:1247,113,0	4	5.71834	6.47378	0.450267	2.80773	2.38484	0
d225003	Ib	Lis-1	FBgn0015754	1	2R:16182260	1	2R	16182260	T	C	TC	FALSE	57	2118.03	AC=2;AF=1.00;AN=2;DP=57;ExcessHet=3.0103;FS=0.000;MLEAC=2;MLEAF=1.00;MQ=60.00;QD=32.41;SOR=1.342	GT:AD:DP:GQ:PL	1/1:0,57:57:99:2132,171,0	4	5.71834	6.47378	0.450267	2.80773	2.38484	0
d225003	Ib	Lis-1	FBgn0015754	1	2R:16182365	1	2R	16182365	G	C	GC	FALSE	75	2618.03	AC=2;AF=1.00;AN=2;DP=75;ExcessHet=3.0103;FS=0.000;MLEAC=2;MLEAF=1.00;MQ=60.00;QD=34.91;SOR=0.955	GT:AD:DP:GQ:PL	1/1:0,75:75:99:2632,223,0	4	5.71834	6.47378	0.450267	2.80773	2.38484	0
d225003	Ib	Lis-1	FBgn0015754	1	2R:16183749	1	2R	16183749	C	T	CT	FALSE	44	1389.03	AC=2;AF=1.00;AN=2;DP=44;ExcessHet=3.0103;FS=0.000;MLEAC=2;MLEAF=1.00;MQ=60.00;QD=31.57;SOR=2.885	GT:AD:DP:GQ:PL	1/1:0,44:44:99:1403,131,0	4	5.71834	6.47378	0.450267	2.80773	2.38484	0
d225003	Ib	Lis-1	FBgn0015754	1	2R:16183950	1	2R	16183950	A	T	AT	FALSE	55	1807.03	AC=2;AF=1.00;AN=2;DP=55;ExcessHet=3.0103;FS=0.000;MLEAC=2;MLEAF=1.00;MQ=60.00;QD=32.86;SOR=1.061	GT:AD:DP:GQ:PL	1/1:0,55:55:99:1821,164,0	4	5.71834	6.47378	0.450267	2.80773	2.38484	0
d225003	Ib	Lis-1	FBgn0015754	1	2R:16184021	1	2R	16184021	G	A	GA	FALSE	45	1499.03	AC=2;AF=1.00;AN=2;DP=45;ExcessHet=3.0103;FS=0.000;MLEAC=2;MLEAF=1.00;MQ=60.00;QD=33.31;SOR=1.154	GT:AD:DP:GQ:PL	1/1:0,45:45:99:1513,135,0	4	5.71834	6.47378	0.450267	2.80773	2.38484	0
d225003	Ib	Lis-1	FBgn0015754	1	2R:16184668	1	2R	16184668	A	T	AT	FALSE	28	920.03	AC=2;AF=1.00;AN=2;DP=28;ExcessHet=3.0103;FS=0.000;MLEAC=2;MLEAF=1.00;MQ=60.00;QD=32.86;SOR=1.179	GT:AD:DP:GQ:PL	1/1:0,28:28:84:934,84,0	4	5.71834	6.47378	0.450267	2.80773	2.38484	0
d225003	Ib	CG42837	FBgn0262026	1	2R:16198143	1	2R	16198143	A	C	AC	FALSE	141	4935.03	AC=2;AF=1.00;AN=2;DP=141;ExcessHet=3.0103;FS=0.000;MLEAC=2;MLEAF=1.00;MQ=60.00;QD=30.66;SOR=1.032	GT:AD:DP:GQ:PL	1/1:0,141:141:99:4949,424,0	4	2.27932	2.35137	0.939676	3.27598	3.14269	0
d225003	Ib	eEF1beta	FBgn0028737	1	2R:16869128	0.25	2R	16869128	G	T	GT	FALSE	40	122.04	AC=1;AF=0.500;AN=2;BaseQRankSum=-1.288;DP=40;ExcessHet=3.0103;FS=2.558;MLEAC=1;MLEAF=0.500;MQ=60.00;MQRankSum=0.000;QD=3.81;ReadPosRankSum=1.987;SOR=1.302	GT:AD:DP:GQ:PL	0/1:24,8:32:99:168,0,799	4	9.7995	9.46589	0.958839	9.11504	9.06539	0
d225003	Ib	Fkbp12	FBgn0013954	1	2R:19290961	0.525	2R	19290961	T	A	TA	FALSE	45	763.6	AC=1;AF=0.500;AN=2;BaseQRankSum=-1.631;DP=45;ExcessHet=3.0103;FS=0.000;MLEAC=1;MLEAF=0.500;MQ=60.00;MQRankSum=0.000;QD=19.09;ReadPosRankSum=0.266;SOR=0.793	GT:AD:DP:GQ:PL	0/1:19,21:40:99:771,0,889	4	10.9805	10.3498	0.300057	7.54456	7.90627	0
d225003	Ib	RpL29	FBgn0016726	1	2R:21294404	0.12069	2R	21294404	C	A	CA	FALSE	58	69.6	AC=1;AF=0.500;AN=2;BaseQRankSum=-3.349;DP=58;ExcessHet=3.0103;FS=3.122;MLEAC=1;MLEAF=0.500;MQ=60.00;MQRankSum=0.000;QD=1.20;ReadPosRankSum=2.365;SOR=0.125	GT:AD:DP:GQ:PL	0/1:51,7:58:77:77,0,1410	4	12.3462	12.3569	0.918117	12.1177	11.882	0
d225003	Ib	MESK2	FBgn0043070	1	2R:21502311	0.21573	2R	21502311	G	A	GA	FALSE	446	1484.04	AC=1;AF=0.500;AN=2;BaseQRankSum=-7.392;DP=446;ExcessHet=3.0103;FS=0.759;MLEAC=1;MLEAF=0.500;MQ=60.00;MQRankSum=0.000;QD=3.33;ReadPosRankSum=-0.934;SOR=0.594	GT:AD:DP:GQ:PL	0/1:349,96:445:99:1684,0,11063	4	6.36504	5.60538	0.0221639	2.21952	2.00932	0
d225003	Ib	RpS24	FBgn0261596	-1	2R:22641033	0.209972	2R	22641033	C	T	GA	FALSE	1426	5639.6	AC=1;AF=0.500;AN=2;BaseQRankSum=-6.944;DP=1426;ExcessHet=3.0103;FS=4.281;MLEAC=1;MLEAF=0.500;MQ=60.00;MQRankSum=0.000;QD=3.96;ReadPosRankSum=2.081;SOR=0.427	GT:AD:DP:GQ:PL	0/1:1125,299:1424:99:5647,0,34457	4	11.6783	11.4462	0.0937966	11.0017	10.8821	0
d225003	Ib	RpL23	FBgn0010078	1	2R:22855650	0.409314	2R	22855650	C	T	CT	FALSE	409	4235.6	AC=1;AF=0.500;AN=2;BaseQRankSum=-1.584;DP=409;ExcessHet=3.0103;FS=0.981;MLEAC=1;MLEAF=0.500;MQ=60.00;MQRankSum=0.000;QD=10.38;ReadPosRankSum=-1.115;SOR=0.497	GT:AD:DP:GQ:PL	0/1:241,167:408:99:4243,0,6964	4	12.2379	12.3251	0.474476	12.0466	11.972	0
d225003	Ib	l(2)k09913	FBgn0021979	1	2R:23071468	0.614583	2R	23071468	C	T	CT	FALSE	192	2991.6	AC=1;AF=0.500;AN=2;BaseQRankSum=-9.193;DP=192;ExcessHet=3.0103;FS=0.547;MLEAC=1;MLEAF=0.500;MQ=60.00;MQRankSum=0.000;QD=15.58;ReadPosRankSum=0.019;SOR=0.772	GT:AD:DP:GQ:PL	0/1:74,118:192:99:2999,0,2120	4	5.70037	5.71941	0.821372	4.68951	4.17918	0
d225003	Ib	RpL39	FBgn0023170	-1	2R:24062431	0.856502	2R	24062431	A	C	TG	FALSE	225	3816.6	AC=1;AF=0.500;AN=2;BaseQRankSum=6.238;DP=225;ExcessHet=3.0103;FS=48.838;MLEAC=1;MLEAF=0.500;MQ=60.00;MQRankSum=0.000;QD=17.11;SOR=4.412	GT:AD:DP:GQ:PL	0/1:32,191:223:99:3824,0,676	4	12.6947	12.6147	0.583388	11.8511	11.7334	0
d225003	Ib	CG4612	FBgn0035016	-1	2R:24524064	1	2R	24524064	C	T	GA	FALSE	84	2663.03	AC=2;AF=1.00;AN=2;DP=84;ExcessHet=3.0103;FS=0.000;MLEAC=2;MLEAF=1.00;MQ=60.00;QD=31.70;SOR=0.843	GT:AD:DP:GQ:PL	1/1:0,84:84:99:2677,251,0	4	5.78401	5.60528	0.826696	1.76623	1.27661	0
d225003	Ib	pnut	FBgn0013726	1	2R:8239511	1	2R	8239511	C	T	CT	FALSE	85	2591.03	AC=2;AF=1.00;AN=2;DP=85;ExcessHet=3.0103;FS=0.000;MLEAC=2;MLEAF=1.00;MQ=60.00;QD=30.48;SOR=1.039	GT:AD:DP:GQ:PL	1/1:0,85:85:99:2605,250,0	4	4.19271	4.26349	0.83449	1.16797	1.53389	0
d225003	Ib	Lcp4	FBgn0002535	1	2R:8437650	0.709677	2R	8437650	C	G	CG	FALSE	62	1475.6	AC=1;AF=0.500;AN=2;BaseQRankSum=3.813;DP=62;ExcessHet=3.0103;FS=10.677;MLEAC=1;MLEAF=0.500;MQ=60.00;MQRankSum=0.000;QD=23.80;ReadPosRankSum=-4.728;SOR=0.077	GT:AD:DP:GQ:PL	0/1:18,44:62:99:1483,0,437	4	7.22388	6.26609	0.690822	12.4228	14.115	0
d225003	Ib	Urod	FBgn0033428	1	2R:9584699	1	2R	9584699	C	T	CT	FALSE	98	4396.03	AC=2;AF=1.00;AN=2;DP=98;ExcessHet=3.0103;FS=0.000;MLEAC=2;MLEAF=1.00;MQ=60.00;QD=32.31;SOR=3.080	GT:AD:DP:GQ:PL	1/1:0,98:98:99:4410,295,0	4	3.41055	3.95204	0.828234	2.88007	2.74325	0
d225003	Ib	Urod	FBgn0033428	1	2R:9585539	1	2R	9585539	G	A	GA	FALSE	143	4432.03	AC=2;AF=1.00;AN=2;DP=143;ExcessHet=3.0103;FS=0.000;MLEAC=2;MLEAF=1.00;MQ=60.00;QD=30.99;SOR=0.857	GT:AD:DP:GQ:PL	1/1:0,143:143:99:4446,427,0	4	3.41055	3.95204	0.828234	2.88007	2.74325	0
d225003	Ib	clos	FBgn0261016	-1	2R:9587990	0.313433	2R	9587990	A	C	TG	FALSE	75	550.6	AC=1;AF=0.500;AN=2;BaseQRankSum=4.377;DP=75;ExcessHet=3.0103;FS=0.000;MLEAC=1;MLEAF=0.500;MQ=60.00;MQRankSum=0.000;QD=8.22;ReadPosRankSum=-2.463;SOR=0.267	GT:AD:DP:GQ:PL	0/1:46,21:67:99:558,0,824	4	0.0749458	0.125458	0.829861	0.0728188	0.0575285	0
d225003	Ib	clos	FBgn0261016	-1	2R:9587993	0.714286	2R	9587993	C	A	GT	FALSE	47	502.6	AC=1;AF=0.500;AN=2;BaseQRankSum=-1.590;DP=47;ExcessHet=3.0103;FS=0.000;MLEAC=1;MLEAF=0.500;MQ=60.00;MQRankSum=0.000;QD=11.97;ReadPosRankSum=1.471;SOR=0.846	GT:AD:DP:GQ:PL	0/1:12,30:42:99:510,0,407	4	0.0749458	0.125458	0.829861	0.0728188	0.0575285	0
d225003	Ib	PCB	FBgn0027580	-1	2R:9850716	1	2R	9850716	T	A	AT	FALSE	45	1502.03	AC=2;AF=1.00;AN=2;DP=45;ExcessHet=3.0103;FS=0.000;MLEAC=2;MLEAF=1.00;MQ=60.00;QD=33.38;SOR=4.758	GT:AD:DP:GQ:PL	1/1:0,45:45:99:1516,135,0	4	2.95692	2.68262	0.927092	2.30749	1.93229	0
d225003	Ib	PCB	FBgn0027580	-1	2R:9850937	1	2R	9850937	A	G	TC	FALSE	173	6542.03	AC=2;AF=1.00;AN=2;DP=173;ExcessHet=3.0103;FS=0.000;MLEAC=2;MLEAF=1.00;MQ=60.00;QD=27.00;SOR=1.840	GT:AD:DP:GQ:PL	1/1:0,173:173:99:6556,520,0	4	2.95692	2.68262	0.927092	2.30749	1.93229	0
d225003	Ib	PCB	FBgn0027580	-1	2R:9851007	1	2R	9851007	C	A	GT	FALSE	148	4824.03	AC=2;AF=1.00;AN=2;DP=148;ExcessHet=3.0103;FS=0.000;MLEAC=2;MLEAF=1.00;MQ=60.00;QD=32.82;SOR=0.852	GT:AD:DP:GQ:PL	1/1:0,147:147:99:4838,440,0	4	2.95692	2.68262	0.927092	2.30749	1.93229	0
d225003	Ib	Sec24AB	FBgn0033460	-1	2R:9876501	1	2R	9876501	G	T	CA	FALSE	125	4096.03	AC=2;AF=1.00;AN=2;DP=125;ExcessHet=3.0103;FS=0.000;MLEAC=2;MLEAF=1.00;MQ=60.00;QD=32.77;SOR=0.958	GT:AD:DP:GQ:PL	1/1:0,125:125:99:4110,374,0	4	2.27312	3.10382	0.435533	1.1652	1.09224	0
d225003	Ib	Sec24AB	FBgn0033460	-1	2R:9876930	1	2R	9876930	A	T	TA	FALSE	237	7718.03	AC=2;AF=1.00;AN=2;DP=237;ExcessHet=3.0103;FS=0.000;MLEAC=2;MLEAF=1.00;MQ=60.00;QD=32.57;SOR=1.540	GT:AD:DP:GQ:PL	1/1:0,237:237:99:7732,709,0	4	2.27312	3.10382	0.435533	1.1652	1.09224	0
d225003	Ib	Mef2	FBgn0011656	-1	2R:9958705	1	2R	9958705	A	C	TG	FALSE	100	3621.03	AC=2;AF=1.00;AN=2;DP=100;ExcessHet=3.0103;FS=0.000;MLEAC=2;MLEAF=1.00;MQ=60.00;QD=31.57;SOR=0.863	GT:AD:DP:GQ:PL	1/1:0,100:100:99:3635,301,0	4	2.39142	1.46708	0.149041	2.04553	1.8255	0
d225003	Ib	Apt1	FBgn0042138	1	3L:11629925	0.461538	3L	11629925	G	T	GT	FALSE	104	1136.6	AC=1;AF=0.500;AN=2;BaseQRankSum=-6.049;DP=104;ExcessHet=3.0103;FS=4.707;MLEAC=1;MLEAF=0.500;MQ=60.00;MQRankSum=0.000;QD=10.93;ReadPosRankSum=-0.593;SOR=0.219	GT:AD:DP:GQ:PL	0/1:56,48:104:99:1144,0,1669	4	7.03967	7.08104	0.899746	3.39757	3.11187	0
d225003	Ib	RpS4	FBgn0011284	1	3L:13043905	0.5	3L	13043905	T	C	TC	FALSE	21	211.6	AC=1;AF=0.500;AN=2;BaseQRankSum=-0.807;DP=21;ExcessHet=3.0103;FS=0.000;MLEAC=1;MLEAF=0.500;MQ=60.00;MQRankSum=0.000;QD=10.58;ReadPosRankSum=2.803;SOR=0.693	GT:AD:DP:GQ:PL	0/1:10,10:20:99:219,0,381	4	11.7053	11.6919	0.574608	10.8292	10.6055	0
d225003	Ib	RpS4	FBgn0011284	1	3L:13043908	0.764706	3L	13043908	C	A	CA	FALSE	17	371.6	AC=1;AF=0.500;AN=2;BaseQRankSum=-2.518;DP=17;ExcessHet=3.0103;FS=0.000;MLEAC=1;MLEAF=0.500;MQ=60.00;MQRankSum=0.000;QD=21.86;ReadPosRankSum=2.480;SOR=0.990	GT:AD:DP:GQ:PL	0/1:4,13:17:99:379,0,151	4	11.7053	11.6919	0.574608	10.8292	10.6055	0
d225003	Ib	Baldspot	FBgn0260960	-1	3L:16650290	1	3L	16650290	C	G	GC	FALSE	52	1668.03	AC=2;AF=1.00;AN=2;DP=52;ExcessHet=3.0103;FS=0.000;MLEAC=2;MLEAF=1.00;MQ=60.00;QD=32.08;SOR=3.528	GT:AD:DP:GQ:PL	1/1:0,52:52:99:1682,155,0	4	4.3162	3.68063	0.334733	2.29501	2.10449	0
d225003	Ib	CG40228	FBgn0063670	-1	3L:27083848	0.153584	3L	27083848	G	A	CT	FALSE	294	405.6	AC=1;AF=0.500;AN=2;BaseQRankSum=-4.663;DP=294;ExcessHet=3.0103;FS=0.000;MLEAC=1;MLEAF=0.500;MQ=60.00;MQRankSum=0.000;QD=1.38;ReadPosRankSum=0.082;SOR=0.697	GT:AD:DP:GQ:PL	0/1:248,45:293:99:413,0,7404	4	7.30566	6.57352	0.516115	4.23839	4.11104	0
d225003	Ib	CG32264	FBgn0052264	-1	3L:3717404	1	3L	3717404	G	T	CA	FALSE	17	813.03	AC=2;AF=1.00;AN=2;DP=17;ExcessHet=3.0103;FS=0.000;MLEAC=2;MLEAF=1.00;MQ=60.00;QD=31.39;SOR=2.179	GT:AD:DP:GQ:PL	1/1:0,17:17:57:827,57,0	4	3.4169	3.8072	0.084539	3.09462	2.70509	0
d225003	Ib	CG32264	FBgn0052264	-1	3L:3717406	1	3L	3717406	A	C	TG	FALSE	14	751.03	AC=2;AF=1.00;AN=2;DP=14;ExcessHet=3.0103;FS=0.000;MLEAC=2;MLEAF=1.00;MQ=60.00;QD=32.22;SOR=3.912	GT:AD:DP:GQ:PL	1/1:0,14:14:51:765,51,0	4	3.4169	3.8072	0.084539	3.09462	2.70509	0
d225003	Ib	Hsp26	FBgn0001225	-1	3L:9377392	1	3L	9377392	G	T	CA	FALSE	73	3361.03	AC=2;AF=1.00;AN=2;DP=73;ExcessHet=3.0103;FS=0.000;MLEAC=2;MLEAF=1.00;MQ=60.00;QD=31.94;SOR=8.608	GT:AD:DP:GQ:PL	1/1:0,73:73:99:3375,226,0	4	6.21479	7.64166	0.01131	4.61514	3.44729	0
d225003	Ib	Hsp26	FBgn0001225	-1	3L:9377397	1	3L	9377397	T	G	AC	FALSE	65	2911.03	AC=2;AF=1.00;AN=2;DP=65;ExcessHet=3.0103;FS=0.000;MLEAC=2;MLEAF=1.00;MQ=60.00;QD=34.64;SOR=8.380	GT:AD:DP:GQ:PL	1/1:0,65:65:99:2925,196,0	4	6.21479	7.64166	0.01131	4.61514	3.44729	0
d225003	Ib	Hsp26	FBgn0001225	-1	3L:9377400	1	3L	9377400	T	G	AC	FALSE	46	2911.03	AC=2;AF=1.00;AN=2;DP=46;ExcessHet=3.0103;FS=0.000;MLEAC=2;MLEAF=1.00;MQ=60.00;QD=26.65;SOR=7.701	GT:AD:DP:GQ:PL	1/1:0,46:46:99:2925,196,0	4	6.21479	7.64166	0.01131	4.61514	3.44729	0
d225003	Ib	Act87E	FBgn0000046	1	3R:13427059	0.153846	3R	13427059	T	C	TC	FALSE	13	43.6	AC=1;AF=0.500;AN=2;BaseQRankSum=-1.341;DP=13;ExcessHet=3.0103;FS=5.304;MLEAC=1;MLEAF=0.500;MQ=60.00;MQRankSum=0.000;QD=3.35;ReadPosRankSum=-1.196;SOR=0.033	GT:AD:DP:GQ:PL	0/1:11,2:13:51:51,0,456	4	4.41248	3.86153	0.556302	9.01247	9.0879	0
d225003	Ib	Act87E	FBgn0000046	1	3R:13427062	0.153846	3R	13427062	C	T	CT	FALSE	13	43.6	AC=1;AF=0.500;AN=2;BaseQRankSum=-1.762;DP=13;ExcessHet=3.0103;FS=5.304;MLEAC=1;MLEAF=0.500;MQ=60.00;MQRankSum=0.000;QD=3.35;ReadPosRankSum=-1.294;SOR=0.033	GT:AD:DP:GQ:PL	0/1:11,2:13:51:51,0,456	4	4.41248	3.86153	0.556302	9.01247	9.0879	0
d225003	Ib	CCT3	FBgn0015019	1	3R:16648753	0.153846	3R	16648753	C	G	CG	FALSE	81	132.6	AC=1;AF=0.500;AN=2;BaseQRankSum=-0.357;DP=81;ExcessHet=3.0103;FS=30.600;MLEAC=1;MLEAF=0.500;MQ=60.00;MQRankSum=0.000;QD=1.70;ReadPosRankSum=1.967;SOR=5.136	GT:AD:DP:GQ:PL	0/1:66,12:78:99:140,0,1541	4	5.71212	6.18949	0.280711	2.89667	2.79005	0
d225003	Ib	EndoA	FBgn0038659	1	3R:18910260	0.277273	3R	18910260	T	C	TC	FALSE	220	1560.6	AC=1;AF=0.500;AN=2;BaseQRankSum=9.484;DP=220;ExcessHet=3.0103;FS=8.590;MLEAC=1;MLEAF=0.500;MQ=60.00;MQRankSum=0.000;QD=7.09;ReadPosRankSum=0.012;SOR=1.774	GT:AD:DP:GQ:PL	0/1:159,61:220:99:1568,0,4429	4	4.7728	5.29408	0.154643	0.85352	0.843628	0
d225003	Ib	Xrp1	FBgn0261113	1	3R:18918473	0.606557	3R	18918473	T	G	TG	FALSE	122	2322.6	AC=1;AF=0.500;AN=2;BaseQRankSum=6.125;DP=122;ExcessHet=3.0103;FS=2.467;MLEAC=1;MLEAF=0.500;MQ=60.00;MQRankSum=0.000;QD=19.04;ReadPosRankSum=-0.543;SOR=1.003	GT:AD:DP:GQ:PL	0/1:48,74:122:99:2330,0,1216	4	6.93525	6.63308	0.99582	5.49922	5.49918	0
d225003	Ib	Xrp1	FBgn0261113	1	3R:18920813	0.6	3R	18920813	C	T	CT	FALSE	140	2565.6	AC=1;AF=0.500;AN=2;BaseQRankSum=0.738;DP=140;ExcessHet=3.0103;FS=3.076;MLEAC=1;MLEAF=0.500;MQ=60.00;MQRankSum=0.000;QD=18.33;ReadPosRankSum=-0.768;SOR=0.564	GT:AD:DP:GQ:PL	0/1:56,84:140:99:2573,0,1489	4	6.93525	6.63308	0.99582	5.49922	5.49918	0
d225003	Ib	Nsun5	FBgn0259704	-1	3R:19162194	1	3R	19162194	C	T	GA	FALSE	136	5154.03	AC=2;AF=1.00;AN=2;DP=136;ExcessHet=3.0103;FS=0.000;MLEAC=2;MLEAF=1.00;MQ=60.00;QD=26.30;SOR=3.800	GT:AD:DP:GQ:PL	1/1:0,135:135:99:5168,400,0	4	1.44057	0.932231	0.274227	1.03784	1.2067	0
d225003	Ib	unc79	FBgn0038693	-1	3R:19245264	1	3R	19245264	G	A	CT	FALSE	41	1802.03	AC=2;AF=1.00;AN=2;DP=41;ExcessHet=3.0103;FS=0.000;MLEAC=2;MLEAF=1.00;MQ=60.00;QD=32.35;SOR=1.206	GT:AD:DP:GQ:PL	1/1:0,41:41:99:1816,123,0	4	2.90697	2.80846	0.812982	0.0661757	0.0380713	0
d225003	Ib	Atpalpha	FBgn0002921	1	3R:20974888	0.109948	3R	20974888	G	A	GA	FALSE	573	406.6	AC=1;AF=0.500;AN=2;BaseQRankSum=-3.964;DP=573;ExcessHet=3.0103;FS=1.912;MLEAC=1;MLEAF=0.500;MQ=60.00;MQRankSum=0.000;QD=0.71;ReadPosRankSum=-0.219;SOR=0.625	GT:AD:DP:GQ:PL	0/1:510,63:573:99:414,0,16571	4	9.18942	9.08294	0.418439	4.40032	4.50151	0
d225003	Ib	Cow	FBgn0039054	-1	3R:23075169	0.466019	3R	23075169	C	T	GA	FALSE	103	1830.6	AC=1;AF=0.500;AN=2;BaseQRankSum=-5.601;DP=103;ExcessHet=3.0103;FS=3.643;MLEAC=1;MLEAF=0.500;MQ=60.00;MQRankSum=0.000;QD=17.77;ReadPosRankSum=1.899;SOR=0.733	GT:AD:DP:GQ:PL	0/1:55,48:103:99:1838,0,2105	4	6.07048	6.14794	0.757327	0.0371922	0.0664222	0
d225003	Ib	Cow	FBgn0039054	-1	3R:23075200	0.529412	3R	23075200	T	A	AT	FALSE	85	1223.6	AC=1;AF=0.500;AN=2;BaseQRankSum=0.821;DP=85;ExcessHet=3.0103;FS=0.812;MLEAC=1;MLEAF=0.500;MQ=60.00;MQRankSum=0.000;QD=14.40;ReadPosRankSum=-2.244;SOR=0.818	GT:AD:DP:GQ:PL	0/1:40,45:85:99:1231,0,954	4	6.07048	6.14794	0.757327	0.0371922	0.0664222	0
d225003	Ib	Cow	FBgn0039054	-1	3R:23075298	0.4	3R	23075298	C	T	GA	FALSE	75	689.6	AC=1;AF=0.500;AN=2;BaseQRankSum=-5.010;DP=75;ExcessHet=3.0103;FS=0.914;MLEAC=1;MLEAF=0.500;MQ=60.00;MQRankSum=0.000;QD=9.19;ReadPosRankSum=-1.994;SOR=0.926	GT:AD:DP:GQ:PL	0/1:45,30:75:99:697,0,1360	4	6.07048	6.14794	0.757327	0.0371922	0.0664222	0
d225003	Ib	Cow	FBgn0039054	-1	3R:23112474	0.431818	3R	23112474	G	A	CT	FALSE	132	1390.6	AC=1;AF=0.500;AN=2;BaseQRankSum=-5.624;DP=132;ExcessHet=3.0103;FS=5.413;MLEAC=1;MLEAF=0.500;MQ=60.00;MQRankSum=0.000;QD=10.53;ReadPosRankSum=-0.927;SOR=0.362	GT:AD:DP:GQ:PL	0/1:75,57:132:99:1398,0,2246	4	6.07048	6.14794	0.757327	0.0371922	0.0664222	0
d225003	Ib	ATPsynCF6	FBgn0016119	-1	3R:23355404	1	3R	23355404	C	T	GA	FALSE	259	10779	AC=2;AF=1.00;AN=2;DP=259;ExcessHet=3.0103;FS=0.000;MLEAC=2;MLEAF=1.00;MQ=60.00;QD=27.33;SOR=3.079	GT:AD:DP:GQ:PL	1/1:0,259:259:99:10793,782,0	4	9.01907	8.99728	0.563116	8.34196	8.52202	0
d225003	Ib	ATPsynCF6	FBgn0016119	-1	3R:23355666	1	3R	23355666	C	T	GA	FALSE	326	10996	AC=2;AF=1.00;AN=2;DP=326;ExcessHet=3.0103;FS=0.000;MLEAC=2;MLEAF=1.00;MQ=60.00;QD=33.73;SOR=0.968	GT:AD:DP:GQ:PL	1/1:0,326:326:99:11010,976,0	4	9.01907	8.99728	0.563116	8.34196	8.52202	0
d225003	Ib	ATPsynCF6	FBgn0016119	-1	3R:23356022	1	3R	23356022	T	G	AC	FALSE	16	531.03	AC=2;AF=1.00;AN=2;DP=16;ExcessHet=3.0103;FS=0.000;MLEAC=2;MLEAF=1.00;MQ=60.00;QD=33.19;SOR=0.693	GT:AD:DP:GQ:PL	1/1:0,16:16:48:545,48,0	4	9.01907	8.99728	0.563116	8.34196	8.52202	0
d225003	Ib	Sec13	FBgn0024509	1	3R:23358058	1	3R	23358058	G	A	GA	FALSE	110	3085.03	AC=2;AF=1.00;AN=2;DP=110;ExcessHet=3.0103;FS=0.000;MLEAC=2;MLEAF=1.00;MQ=60.00;QD=28.57;SOR=1.028	GT:AD:DP:GQ:PL	1/1:0,108:108:99:3099,320,0	4	3.99691	3.71929	0.929505	3.0338	3.04866	0
d225003	Ib	Sec13	FBgn0024509	1	3R:23358145	0.990196	3R	23358145	T	C	TC	FALSE	103	3496.03	AC=2;AF=1.00;AN=2;BaseQRankSum=1.780;DP=103;ExcessHet=3.0103;FS=0.000;MLEAC=2;MLEAF=1.00;MQ=60.00;MQRankSum=0.000;QD=34.27;ReadPosRankSum=1.540;SOR=1.773	GT:AD:DP:GQ:PL	1/1:1,101:102:99:3510,297,0	4	3.99691	3.71929	0.929505	3.0338	3.04866	0
d225003	Ib	Sec13	FBgn0024509	1	3R:23358229	1	3R	23358229	C	T	CT	FALSE	39	1212.03	AC=2;AF=1.00;AN=2;DP=39;ExcessHet=3.0103;FS=0.000;MLEAC=2;MLEAF=1.00;MQ=60.00;QD=31.08;SOR=4.461	GT:AD:DP:GQ:PL	1/1:0,39:39:99:1226,116,0	4	3.99691	3.71929	0.929505	3.0338	3.04866	0
d225003	Ib	RpS3	FBgn0002622	1	3R:23359255	0.359976	3R	23359255	T	C	TC	FALSE	1670	15719.6	AC=1;AF=0.500;AN=2;BaseQRankSum=8.679;DP=1670;ExcessHet=3.0103;FS=1.155;MLEAC=1;MLEAF=0.500;MQ=60.00;MQRankSum=0.000;QD=9.45;ReadPosRankSum=-1.397;SOR=0.808	GT:AD:DP:GQ:PL	0/1:1065,599:1664:99:15727,0,31843	4	11.3972	11.4997	0.982615	10.5923	10.366	0
d225003	Ib	Rpn9	FBgn0028691	-1	3R:23732279	1	3R	23732279	G	A	CT	FALSE	309	9466.03	AC=2;AF=1.00;AN=2;DP=309;ExcessHet=3.0103;FS=0.000;MLEAC=2;MLEAF=1.00;MQ=60.00;QD=30.93;SOR=1.319	GT:AD:DP:GQ:PL	1/1:0,306:306:99:9480,910,0	4	5.9203	5.87523	0.666956	6.44082	5.85144	0
d225003	Ib	Rpn9	FBgn0028691	-1	3R:23732531	1	3R	23732531	A	T	TA	FALSE	321	10609	AC=2;AF=1.00;AN=2;DP=321;ExcessHet=3.0103;FS=0.000;MLEAC=2;MLEAF=1.00;MQ=60.00;QD=33.05;SOR=0.699	GT:AD:DP:GQ:PL	1/1:0,321:321:99:10623,959,0	4	5.9203	5.87523	0.666956	6.44082	5.85144	0
d225003	Ib	Gdh	FBgn0001098	-1	3R:23942634	0.56338	3R	23942634	G	A	CT	FALSE	71	1122.6	AC=1;AF=0.500;AN=2;BaseQRankSum=-0.346;DP=71;ExcessHet=3.0103;FS=5.808;MLEAC=1;MLEAF=0.500;MQ=60.00;MQRankSum=0.000;QD=15.81;ReadPosRankSum=-0.228;SOR=0.220	GT:AD:DP:GQ:PL	0/1:31,40:71:99:1130,0,855	4	6.73636	5.26871	0.00814535	4.37474	4.57326	0
d225003	Ib	CG31140	FBgn0051140	1	3R:23981933	1	3R	23981933	C	T	CT	FALSE	30	927.03	AC=2;AF=1.00;AN=2;DP=30;ExcessHet=3.0103;FS=0.000;MLEAC=2;MLEAF=1.00;MQ=60.00;QD=30.90;SOR=0.826	GT:AD:DP:GQ:PL	1/1:0,30:30:90:941,90,0	4	5.33289	5.77175	0.887479	1.38007	1.01442	0
d225003	Ib	Ald1	FBgn0000064	-1	3R:26254088	0.338983	3R	26254088	G	C	CG	FALSE	59	707.6	AC=1;AF=0.500;AN=2;BaseQRankSum=3.457;DP=59;ExcessHet=3.0103;FS=0.000;MLEAC=1;MLEAF=0.500;MQ=60.00;MQRankSum=0.000;QD=11.99;ReadPosRankSum=1.038;SOR=0.484	GT:AD:DP:GQ:PL	0/1:39,20:59:99:715,0,2235	4	11.4026	10.0568	0.0414265	10.8637	11.1339	0
d225003	Ib	Ald1	FBgn0000064	-1	3R:26254107	0.327103	3R	26254107	T	G	AC	FALSE	107	1112.6	AC=1;AF=0.500;AN=2;BaseQRankSum=5.970;DP=107;ExcessHet=3.0103;FS=3.073;MLEAC=1;MLEAF=0.500;MQ=60.00;MQRankSum=0.000;QD=10.40;ReadPosRankSum=1.043;SOR=1.242	GT:AD:DP:GQ:PL	0/1:72,35:107:99:1120,0,3231	4	11.4026	10.0568	0.0414265	10.8637	11.1339	0
d225003	Ib	Ald1	FBgn0000064	-1	3R:26254310	0.401294	3R	26254310	T	A	AT	FALSE	309	3170.6	AC=1;AF=0.500;AN=2;BaseQRankSum=-1.271;DP=309;ExcessHet=3.0103;FS=10.148;MLEAC=1;MLEAF=0.500;MQ=60.00;MQRankSum=0.000;QD=10.26;ReadPosRankSum=1.415;SOR=0.347	GT:AD:DP:GQ:PL	0/1:185,124:309:99:3178,0,5449	4	11.4026	10.0568	0.0414265	10.8637	11.1339	0
d225003	Ib	Ald1	FBgn0000064	-1	3R:26254347	0.415441	3R	26254347	G	C	CG	FALSE	272	3136.6	AC=1;AF=0.500;AN=2;BaseQRankSum=-3.075;DP=272;ExcessHet=3.0103;FS=6.579;MLEAC=1;MLEAF=0.500;MQ=60.00;MQRankSum=0.000;QD=11.53;ReadPosRankSum=-1.067;SOR=0.675	GT:AD:DP:GQ:PL	0/1:159,113:272:99:3144,0,5030	4	11.4026	10.0568	0.0414265	10.8637	11.1339	0
d225003	Ib	Ald1	FBgn0000064	-1	3R:26254449	0.335968	3R	26254449	G	T	CA	FALSE	253	2184.6	AC=1;AF=0.500;AN=2;BaseQRankSum=-6.145;DP=253;ExcessHet=3.0103;FS=16.330;MLEAC=1;MLEAF=0.500;MQ=60.00;MQRankSum=0.000;QD=8.63;ReadPosRankSum=-0.825;SOR=1.233	GT:AD:DP:GQ:PL	0/1:168,85:253:99:2192,0,5338	4	11.4026	10.0568	0.0414265	10.8637	11.1339	0
d225003	Ib	Ald1	FBgn0000064	-1	3R:26254539	0.29845	3R	26254539	G	A	CT	FALSE	258	1848.6	AC=1;AF=0.500;AN=2;BaseQRankSum=-5.076;DP=258;ExcessHet=3.0103;FS=4.664;MLEAC=1;MLEAF=0.500;MQ=60.00;MQRankSum=0.000;QD=7.17;ReadPosRankSum=0.470;SOR=0.810	GT:AD:DP:GQ:PL	0/1:181,77:258:99:1856,0,5928	4	11.4026	10.0568	0.0414265	10.8637	11.1339	0
d225003	Ib	Ald1	FBgn0000064	-1	3R:26254561	0.367273	3R	26254561	T	A	AT	FALSE	275	2664.6	AC=1;AF=0.500;AN=2;BaseQRankSum=2.362;DP=275;ExcessHet=3.0103;FS=7.150;MLEAC=1;MLEAF=0.500;MQ=60.00;MQRankSum=0.000;QD=9.69;ReadPosRankSum=0.221;SOR=1.114	GT:AD:DP:GQ:PL	0/1:174,101:275:99:2672,0,5080	4	11.4026	10.0568	0.0414265	10.8637	11.1339	0
d225003	Ib	Ald1	FBgn0000064	-1	3R:26255222	0.389458	3R	26255222	T	A	AT	FALSE	685	5763.6	AC=1;AF=0.500;AN=2;BaseQRankSum=-6.547;DP=685;ExcessHet=3.0103;FS=1.805;MLEAC=1;MLEAF=0.500;MQ=60.00;MQRankSum=0.000;QD=8.44;ReadPosRankSum=-1.861;SOR=0.580	GT:AD:DP:GQ:PL	0/1:417,266:683:99:5771,0,12066	4	11.4026	10.0568	0.0414265	10.8637	11.1339	0
d225003	Ib	Ald1	FBgn0000064	-1	3R:26255318	0.345794	3R	26255318	G	T	CA	FALSE	749	6240.6	AC=1;AF=0.500;AN=2;BaseQRankSum=-12.092;DP=749;ExcessHet=3.0103;FS=5.379;MLEAC=1;MLEAF=0.500;MQ=60.00;MQRankSum=0.000;QD=8.33;ReadPosRankSum=2.990;SOR=1.076	GT:AD:DP:GQ:PL	0/1:490,259:749:99:6248,0,15428	4	11.4026	10.0568	0.0414265	10.8637	11.1339	0
d225003	Ib	Ald1	FBgn0000064	-1	3R:26257733	0.354042	3R	26257733	C	T	GA	FALSE	1342	11320.6	AC=1;AF=0.500;AN=2;BaseQRankSum=-17.505;DP=1342;ExcessHet=3.0103;FS=0.000;MLEAC=1;MLEAF=0.500;MQ=60.00;MQRankSum=0.000;QD=8.47;ReadPosRankSum=0.719;SOR=0.693	GT:AD:DP:GQ:PL	0/1:863,473:1336:99:11328,0,26813	4	11.4026	10.0568	0.0414265	10.8637	11.1339	0
d225003	Ib	amon	FBgn0023179	-1	3R:26703754	0.923729	3R	26703754	C	T	GA	FALSE	118	4936.6	AC=1;AF=0.500;AN=2;BaseQRankSum=-4.970;DP=118;ExcessHet=3.0103;FS=8.215;MLEAC=1;MLEAF=0.500;MQ=60.00;MQRankSum=0.000;QD=31.02;ReadPosRankSum=0.193;SOR=0.108	GT:AD:DP:GQ:PL	0/1:9,109:118:62:4944,0,62	4	3.7941	5.3843	0.0246449	0.0396884	0.13839	0
d225003	Ib	amon	FBgn0023179	-1	3R:26703756	0.922481	3R	26703756	T	G	AC	FALSE	129	4936.6	AC=1;AF=0.500;AN=2;BaseQRankSum=2.324;DP=129;ExcessHet=3.0103;FS=7.866;MLEAC=1;MLEAF=0.500;MQ=60.00;MQRankSum=0.000;QD=30.54;ReadPosRankSum=0.239;SOR=0.108	GT:AD:DP:GQ:PL	0/1:10,119:129:62:4944,0,62	4	3.7941	5.3843	0.0246449	0.0396884	0.13839	0
d225003	Ib	VhaAC45RP	FBgn0051030	-1	3R:30165428	0.112745	3R	30165428	C	T	GA	FALSE	612	283.6	AC=1;AF=0.500;AN=2;BaseQRankSum=-7.655;DP=612;ExcessHet=3.0103;FS=6.576;MLEAC=1;MLEAF=0.500;MQ=60.00;MQRankSum=0.000;QD=0.46;ReadPosRankSum=-3.127;SOR=1.647	GT:AD:DP:GQ:PL	0/1:543,69:612:99:291,0,16994	4	6.3392	6.42463	0.721484	0.410326	0.49666	0
d225003	Ib	tmod	FBgn0082582	1	3R:30577483	0.181102	3R	30577483	T	C	TC	FALSE	127	613.6	AC=1;AF=0.500;AN=2;BaseQRankSum=0.758;DP=127;ExcessHet=3.0103;FS=29.357;MLEAC=1;MLEAF=0.500;MQ=60.00;MQRankSum=0.000;QD=4.83;ReadPosRankSum=-0.229;SOR=2.815	GT:AD:DP:GQ:PL	0/1:104,23:127:99:621,0,5112	4	5.81165	6.22782	0.293856	5.59956	5.11275	0
d225003	Ib	cindr	FBgn0027598	1	3R:30808701	1	3R	30808701	C	A	CA	FALSE	66	2126.03	AC=2;AF=1.00;AN=2;DP=66;ExcessHet=3.0103;FS=0.000;MLEAC=2;MLEAF=1.00;MQ=60.00;QD=32.21;SOR=0.957	GT:AD:DP:GQ:PL	1/1:0,66:66:99:2140,197,0	4	3.79459	4.09584	0.742166	2.21586	2.35913	0
d225003	Ib	cindr	FBgn0027598	1	3R:30808716	1	3R	30808716	A	T	AT	FALSE	56	1797.03	AC=2;AF=1.00;AN=2;DP=56;ExcessHet=3.0103;FS=0.000;MLEAC=2;MLEAF=1.00;MQ=60.00;QD=32.09;SOR=0.841	GT:AD:DP:GQ:PL	1/1:0,56:56:99:1811,167,0	4	3.79459	4.09584	0.742166	2.21586	2.35913	0
d225003	Ib	cindr	FBgn0027598	1	3R:30808815	1	3R	30808815	C	G	CG	FALSE	44	1485.03	AC=2;AF=1.00;AN=2;DP=44;ExcessHet=3.0103;FS=0.000;MLEAC=2;MLEAF=1.00;MQ=60.00;QD=33.75;SOR=1.364	GT:AD:DP:GQ:PL	1/1:0,44:44:99:1499,131,0	4	3.79459	4.09584	0.742166	2.21586	2.35913	0
d225003	Ib	cindr	FBgn0027598	1	3R:30808849	1	3R	30808849	C	A	CA	FALSE	59	1753.03	AC=2;AF=1.00;AN=2;DP=59;ExcessHet=3.0103;FS=0.000;MLEAC=2;MLEAF=1.00;MQ=60.00;QD=29.71;SOR=1.773	GT:AD:DP:GQ:PL	1/1:0,59:59:99:1767,176,0	4	3.79459	4.09584	0.742166	2.21586	2.35913	0
d225003	Ib	cindr	FBgn0027598	1	3R:30808926	1	3R	30808926	G	T	GT	FALSE	59	1864.03	AC=2;AF=1.00;AN=2;DP=59;ExcessHet=3.0103;FS=0.000;MLEAC=2;MLEAF=1.00;MQ=60.00;QD=31.59;SOR=1.034	GT:AD:DP:GQ:PL	1/1:0,59:59:99:1878,175,0	4	3.79459	4.09584	0.742166	2.21586	2.35913	0
d225003	Ib	cindr	FBgn0027598	1	3R:30809018	1	3R	30809018	G	A	GA	FALSE	49	2177.03	AC=2;AF=1.00;AN=2;DP=49;ExcessHet=3.0103;FS=0.000;MLEAC=2;MLEAF=1.00;MQ=60.00;QD=32.56;SOR=4.935	GT:AD:DP:GQ:PL	1/1:0,49:49:99:2191,147,0	4	3.79459	4.09584	0.742166	2.21586	2.35913	0
d225003	Ib	cindr	FBgn0027598	1	3R:30809019	1	3R	30809019	C	G	CG	FALSE	49	2177.03	AC=2;AF=1.00;AN=2;DP=49;ExcessHet=3.0103;FS=0.000;MLEAC=2;MLEAF=1.00;MQ=60.00;QD=26.02;SOR=4.935	GT:AD:DP:GQ:PL	1/1:0,49:49:99:2191,147,0	4	3.79459	4.09584	0.742166	2.21586	2.35913	0
d225003	Ib	cindr	FBgn0027598	1	3R:30809037	1	3R	30809037	G	A	GA	FALSE	31	1381.03	AC=2;AF=1.00;AN=2;DP=31;ExcessHet=3.0103;FS=0.000;MLEAC=2;MLEAF=1.00;MQ=60.00;QD=27.88;SOR=4.615	GT:AD:DP:GQ:PL	1/1:0,31:31:93:1395,93,0	4	3.79459	4.09584	0.742166	2.21586	2.35913	0
d225003	Ib	Sap-r	FBgn0000416	-1	3R:30883683	0.247312	3R	30883683	C	A	GT	FALSE	93	398.6	AC=1;AF=0.500;AN=2;BaseQRankSum=1.895;DP=93;ExcessHet=3.0103;FS=61.118;MLEAC=1;MLEAF=0.500;MQ=60.00;MQRankSum=0.000;QD=4.29;ReadPosRankSum=2.887;SOR=3.322	GT:AD:DP:GQ:PL	0/1:70,23:93:99:406,0,1758	4	4.37674	5.14599	0.934003	6.24628	5.9728	0
d225003	Ib	5-HT7	FBgn0004573	-1	3R:30968622	1	3R	30968622	A	G	TC	FALSE	155	5449.03	AC=2;AF=1.00;AN=2;DP=155;ExcessHet=3.0103;FS=0.000;MLEAC=2;MLEAF=1.00;MQ=60.00;QD=26.71;SOR=3.870	GT:AD:DP:GQ:PL	1/1:0,155:155:99:5463,466,0	4	2.11725	0.538474	5.53295e-05	0.0501364	0.0352084	0
d225003	Ib	cpx	FBgn0041605	1	3R:4297487	1	3R	4297487	G	A	GA	FALSE	11	365.02	AC=2;AF=1.00;AN=2;DP=11;ExcessHet=3.0103;FS=0.000;MLEAC=2;MLEAF=1.00;MQ=60.00;QD=33.18;SOR=4.977	GT:AD:DP:GQ:PL	1/1:0,11:11:33:379,33,0	4	7.90852	7.29727	0.637321	0.177459	0.228242	0
d225003	Ib	RpL13A	FBgn0037351	1	3R:5625129	0.753472	3R	5625129	A	C	AC	FALSE	288	6734.6	AC=1;AF=0.500;AN=2;BaseQRankSum=-5.744;DP=288;ExcessHet=3.0103;FS=92.682;MLEAC=1;MLEAF=0.500;MQ=60.00;MQRankSum=0.000;QD=23.38;ReadPosRankSum=11.941;SOR=0.257	GT:AD:DP:GQ:PL	0/1:71,217:288:99:6742,0,1681	4	11.8685	11.8339	0.899746	11.5663	11.4694	0
d225003	Ib	sbm	FBgn0030574	-1	X:14585054	0.8375	X	14585054	A	T	TA	FALSE	240	8072.6	AC=1;AF=0.500;AN=2;BaseQRankSum=-3.981;DP=240;ExcessHet=3.0103;FS=22.638;MLEAC=1;MLEAF=0.500;MQ=60.00;MQRankSum=0.000;QD=33.64;ReadPosRankSum=0.815;SOR=2.172	GT:AD:DP:GQ:PL	0/1:39,201:240:99:8080,0,1025	4	5.35192	4.91139	0.69258	2.81017	2.98625	0
d225003	Ib	sbm	FBgn0030574	-1	X:14585061	0.825328	X	14585061	T	A	AT	FALSE	229	7793.6	AC=1;AF=0.500;AN=2;BaseQRankSum=-3.409;DP=229;ExcessHet=3.0103;FS=22.123;MLEAC=1;MLEAF=0.500;MQ=60.00;MQRankSum=0.000;QD=34.03;ReadPosRankSum=0.078;SOR=2.170	GT:AD:DP:GQ:PL	0/1:40,189:229:99:7801,0,1090	4	5.35192	4.91139	0.69258	2.81017	2.98625	0
d225003	Ib	sbm	FBgn0030574	-1	X:14585710	0.403909	X	14585710	T	A	AT	FALSE	307	3077.6	AC=1;AF=0.500;AN=2;BaseQRankSum=-0.959;DP=307;ExcessHet=3.0103;FS=16.627;MLEAC=1;MLEAF=0.500;MQ=60.00;MQRankSum=0.000;QD=10.02;ReadPosRankSum=-1.069;SOR=0.286	GT:AD:DP:GQ:PL	0/1:183,124:307:99:3085,0,5298	4	5.35192	4.91139	0.69258	2.81017	2.98625	0
d225003	Ib	hiw	FBgn0030600	-1	X:15010286	0.993548	X	15010286	G	T	CA	FALSE	155	4644.03	AC=2;AF=1.00;AN=2;BaseQRankSum=1.550;DP=155;ExcessHet=3.0103;FS=3.979;MLEAC=2;MLEAF=1.00;MQ=60.00;MQRankSum=0.000;QD=29.96;ReadPosRankSum=1.483;SOR=0.936	GT:AD:DP:GQ:PL	1/1:1,154:155:99:4658,448,0	4	1.94674	2.4482	0.178417	0.0207204	0.0219914	0
d225003	Ib	hiw	FBgn0030600	-1	X:15010399	1	X	15010399	G	A	CT	FALSE	185	5691.03	AC=2;AF=1.00;AN=2;DP=185;ExcessHet=3.0103;FS=0.000;MLEAC=2;MLEAF=1.00;MQ=60.00;QD=30.76;SOR=1.437	GT:AD:DP:GQ:PL	1/1:0,185:185:99:5705,517,0	4	1.94674	2.4482	0.178417	0.0207204	0.0219914	0
d225003	Ib	CG43737	FBgn0263994	1	X:15175839	0.543956	X	15175839	C	T	CT	FALSE	182	3966.6	AC=1;AF=0.500;AN=2;BaseQRankSum=-4.140;DP=182;ExcessHet=3.0103;FS=7.722;MLEAC=1;MLEAF=0.500;MQ=60.00;MQRankSum=0.000;QD=21.79;ReadPosRankSum=-1.658;SOR=0.326	GT:AD:DP:GQ:PL	0/1:83,99:182:99:3974,0,3844	4	4.63614	1.17921	4.70339e-15	0.0250792	0.0176775	0
d225003	Ib	CG43737	FBgn0263994	1	X:15175846	0.505703	X	15175846	A	T	AT	FALSE	263	4707.6	AC=1;AF=0.500;AN=2;BaseQRankSum=-1.748;DP=263;ExcessHet=3.0103;FS=6.986;MLEAC=1;MLEAF=0.500;MQ=60.00;MQRankSum=0.000;QD=17.90;ReadPosRankSum=0.164;SOR=0.401	GT:AD:DP:GQ:PL	0/1:130,133:263:99:4715,0,4498	4	4.63614	1.17921	4.70339e-15	0.0250792	0.0176775	0
d225003	Ib	Scamp	FBgn0040285	-1	X:15447785	0.646429	X	15447785	G	A	CT	FALSE	280	5110.6	AC=1;AF=0.500;AN=2;BaseQRankSum=-4.063;DP=280;ExcessHet=3.0103;FS=1.527;MLEAC=1;MLEAF=0.500;MQ=60.00;MQRankSum=0.000;QD=18.25;ReadPosRankSum=0.332;SOR=0.576	GT:AD:DP:GQ:PL	0/1:99,181:280:99:5118,0,2522	4	4.65439	5.00659	0.854862	3.18868	2.74335	0
d225003	Ib	HUWE1	FBgn0030674	1	X:15730447	1	X	15730447	C	T	CT	FALSE	77	2385.03	AC=2;AF=1.00;AN=2;DP=77;ExcessHet=3.0103;FS=0.000;MLEAC=2;MLEAF=1.00;MQ=60.00;QD=30.97;SOR=1.550	GT:AD:DP:GQ:PL	1/1:0,77:77:99:2399,229,0	4	2.34178	2.49123	0.920489	0.953593	0.788892	0
d225003	Ib	HUWE1	FBgn0030674	1	X:15731262	1	X	15731262	T	C	TC	FALSE	56	1890.03	AC=2;AF=1.00;AN=2;DP=56;ExcessHet=3.0103;FS=0.000;MLEAC=2;MLEAF=1.00;MQ=60.00;QD=33.75;SOR=1.009	GT:AD:DP:GQ:PL	1/1:0,56:56:99:1904,167,0	4	2.34178	2.49123	0.920489	0.953593	0.788892	0
d225003	Ib	Gapdh2	FBgn0001092	1	X:15869496	0.406279	X	15869496	G	A	GA	FALSE	1086	10679.6	AC=1;AF=0.500;AN=2;BaseQRankSum=-13.076;DP=1086;ExcessHet=3.0103;FS=0.000;MLEAC=1;MLEAF=0.500;MQ=60.00;MQRankSum=0.000;QD=9.86;ReadPosRankSum=-2.551;SOR=0.737	GT:AD:DP:GQ:PL	0/1:643,440:1083:99:10687,0,19514	4	11.2878	10.1547	0.10216	9.85262	10.5896	0
d225003	Ib	MSBP	FBgn0030703	-1	X:15887770	1	X	15887770	G	T	CA	FALSE	142	4789.03	AC=2;AF=1.00;AN=2;DP=142;ExcessHet=3.0103;FS=0.000;MLEAC=2;MLEAF=1.00;MQ=60.00;QD=33.73;SOR=1.418	GT:AD:DP:GQ:PL	1/1:0,142:142:99:4803,426,0	4	5.23773	4.65818	0.566046	4.38139	3.65296	0
d225003	Ib	Appl	FBgn0000108	1	X:577991	0.167568	X	577991	G	A	GA	FALSE	185	455.6	AC=1;AF=0.500;AN=2;BaseQRankSum=-2.201;DP=185;ExcessHet=3.0103;FS=12.835;MLEAC=1;MLEAF=0.500;MQ=60.00;MQRankSum=0.000;QD=2.46;ReadPosRankSum=-1.309;SOR=0.179	GT:AD:DP:GQ:PL	0/1:154,31:185:99:463,0,4600	4	6.49275	6.40458	0.874244	0.273023	0.153435	0
d225003	Ib	pod1	FBgn0029903	1	X:6813666	1	X	6813666	G	A	GA	FALSE	19	517.03	AC=2;AF=1.00;AN=2;DP=19;ExcessHet=3.0103;FS=0.000;MLEAC=2;MLEAF=1.00;MQ=60.00;QD=27.21;SOR=1.981	GT:AD:DP:GQ:PL	1/1:0,19:19:57:531,57,0	4	2.93974	3.61414	0.571121	0.849529	0.746895	0
d225003	Ib	ogre	FBgn0004646	-1	X:6981425	0.980392	X	6981425	A	T	TA	FALSE	51	1716.03	AC=2;AF=1.00;AN=2;BaseQRankSum=1.777;DP=51;ExcessHet=3.0103;FS=4.288;MLEAC=2;MLEAF=1.00;MQ=60.00;MQRankSum=0.000;QD=33.65;ReadPosRankSum=1.200;SOR=1.184	GT:AD:DP:GQ:PL	1/1:1,50:51:99:1730,143,0	4	2.64248	1.71608	0.119194	1.92517	2.43397	0
d225003	Ib	Sxl	FBgn0264270	-1	X:7075831	1	X	7075831	C	T	GA	FALSE	185	6400.03	AC=2;AF=1.00;AN=2;DP=185;ExcessHet=3.0103;FS=0.000;MLEAC=2;MLEAF=1.00;MQ=60.00;QD=34.59;SOR=1.742	GT:AD:DP:GQ:PL	1/1:0,185:185:99:6414,555,0	4	4.65086	4.22784	0.16069	3.03478	2.89005	0
d225003	Ib	sdt	FBgn0261873	1	X:8179046	0.441065	X	8179046	G	A	GA	FALSE	263	3026.6	AC=1;AF=0.500;AN=2;BaseQRankSum=-4.055;DP=263;ExcessHet=3.0103;FS=0.945;MLEAC=1;MLEAF=0.500;MQ=60.00;MQRankSum=0.000;QD=11.51;ReadPosRankSum=0.796;SOR=0.690	GT:AD:DP:GQ:PL	0/1:147,116:263:99:3034,0,4195	4	3.2011	3.62824	0.393265	0.562036	0.832706	0
d225005	Ib	RpL7	FBgn0005593	1	2L:10202164	0.4	2L	10202164	C	A	CA	FALSE	45	458.6	AC=1;AF=0.500;AN=2;BaseQRankSum=0.581;DP=45;ExcessHet=3.0103;FS=0.000;MLEAC=1;MLEAF=0.500;MQ=60.00;MQRankSum=0.000;QD=10.19;ReadPosRankSum=-5.305;SOR=0.379	GT:AD:DP:GQ:PL	0/1:27,18:45:99:466,0,1068	4	11.7293	11.7697	0.664372	11.1406	10.9857	4.20006
d225005	Ib	CG31717	FBgn0051717	1	2L:10251648	0.260116	2L	10251648	G	A	GA	FALSE	176	988.64	AC=1;AF=0.500;AN=2;BaseQRankSum=-6.937;DP=176;ExcessHet=3.0103;FS=0.000;MLEAC=1;MLEAF=0.500;MQ=60.00;MQRankSum=0.000;QD=5.71;ReadPosRankSum=1.303;SOR=0.627	GT:AD:DP:GQ:PL	0/1:128,45:173:99:996,0,3885	4	6.16276	6.94588	0.0485892	6.29343	5.52658	4.20006
d225005	Ib	Pex19	FBgn0032407	1	2L:12093853	1	2L	12093853	A	C	AC	FALSE	37	1278.03	AC=2;AF=1.00;AN=2;DP=37;ExcessHet=3.0103;FS=0.000;MLEAC=2;MLEAF=1.00;MQ=60.00;QD=34.54;SOR=4.351	GT:AD:DP:GQ:PL	1/1:0,37:37:99:1292,111,0	4	5.52679	4.58011	0.198542	3.35329	3.35545	4.20006
d225005	Ib	Pex19	FBgn0032407	1	2L:12093901	1	2L	12093901	T	C	TC	FALSE	42	1525.03	AC=2;AF=1.00;AN=2;DP=42;ExcessHet=3.0103;FS=0.000;MLEAC=2;MLEAF=1.00;MQ=60.00;QD=28.29;SOR=4.125	GT:AD:DP:GQ:PL	1/1:0,42:42:99:1539,126,0	4	5.52679	4.58011	0.198542	3.35329	3.35545	4.20006
d225005	Ib	Pex19	FBgn0032407	1	2L:12094055	1	2L	12094055	G	A	GA	FALSE	101	3226.03	AC=2;AF=1.00;AN=2;DP=101;ExcessHet=3.0103;FS=0.000;MLEAC=2;MLEAF=1.00;MQ=60.00;QD=31.94;SOR=1.779	GT:AD:DP:GQ:PL	1/1:0,101:101:99:3240,300,0	4	5.52679	4.58011	0.198542	3.35329	3.35545	4.20006
d225005	Ib	Pex19	FBgn0032407	1	2L:12094069	1	2L	12094069	A	C	AC	FALSE	97	4287.03	AC=2;AF=1.00;AN=2;DP=97;ExcessHet=3.0103;FS=0.000;MLEAC=2;MLEAF=1.00;MQ=60.00;QD=25.85;SOR=1.156	GT:AD:DP:GQ:PL	1/1:0,97:97:99:4301,295,0	4	5.52679	4.58011	0.198542	3.35329	3.35545	4.20006
d225005	Ib	Pex19	FBgn0032407	1	2L:12094077	1	2L	12094077	C	G	CG	FALSE	99	4385.03	AC=2;AF=1.00;AN=2;DP=99;ExcessHet=3.0103;FS=0.000;MLEAC=2;MLEAF=1.00;MQ=60.00;QD=31.63;SOR=0.936	GT:AD:DP:GQ:PL	1/1:0,99:99:99:4399,301,0	4	5.52679	4.58011	0.198542	3.35329	3.35545	4.20006
d225005	Ib	Pex19	FBgn0032407	1	2L:12094088	1	2L	12094088	C	T	CT	FALSE	117	3817.03	AC=2;AF=1.00;AN=2;DP=117;ExcessHet=3.0103;FS=0.000;MLEAC=2;MLEAF=1.00;MQ=60.00;QD=32.62;SOR=0.745	GT:AD:DP:GQ:PL	1/1:0,117:117:99:3831,349,0	4	5.52679	4.58011	0.198542	3.35329	3.35545	4.20006
d225005	Ib	Pex19	FBgn0032407	1	2L:12094289	1	2L	12094289	T	A	TA	FALSE	60	2863.03	AC=2;AF=1.00;AN=2;DP=60;ExcessHet=3.0103;FS=0.000;MLEAC=2;MLEAF=1.00;MQ=60.00;QD=30.36;SOR=1.071	GT:AD:DP:GQ:PL	1/1:0,60:60:99:2877,199,0	4	5.52679	4.58011	0.198542	3.35329	3.35545	4.20006
d225005	Ib	Pex19	FBgn0032407	1	2L:12094682	1	2L	12094682	C	G	CG	FALSE	129	4609.03	AC=2;AF=1.00;AN=2;DP=129;ExcessHet=3.0103;FS=0.000;MLEAC=2;MLEAF=1.00;MQ=60.00;QD=30.15;SOR=1.384	GT:AD:DP:GQ:PL	1/1:0,129:129:99:4623,388,0	4	5.52679	4.58011	0.198542	3.35329	3.35545	4.20006
d225005	Ib	ThrRS	FBgn0027081	1	2L:12106057	0.105263	2L	12106057	T	C	TC	FALSE	133	111.6	AC=1;AF=0.500;AN=2;BaseQRankSum=4.544;DP=133;ExcessHet=3.0103;FS=16.253;MLEAC=1;MLEAF=0.500;MQ=60.00;MQRankSum=0.000;QD=0.84;ReadPosRankSum=-1.453;SOR=2.272	GT:AD:DP:GQ:PL	0/1:119,14:133:99:119,0,3434	4	5.11791	5.14664	0.914631	2.22626	2.05694	4.20006
d225005	Ib	ThrRS	FBgn0027081	1	2L:12106306	0.536458	2L	12106306	T	C	TC	FALSE	192	3554.6	AC=1;AF=0.500;AN=2;BaseQRankSum=2.726;DP=192;ExcessHet=3.0103;FS=29.809;MLEAC=1;MLEAF=0.500;MQ=60.00;MQRankSum=0.000;QD=18.51;ReadPosRankSum=2.106;SOR=2.057	GT:AD:DP:GQ:PL	0/1:89,103:192:99:3562,0,3000	4	5.11791	5.14664	0.914631	2.22626	2.05694	4.20006
d225005	Ib	ThrRS	FBgn0027081	1	2L:12106330	0.50641	2L	12106330	C	T	CT	FALSE	156	2983.6	AC=1;AF=0.500;AN=2;BaseQRankSum=-6.139;DP=156;ExcessHet=3.0103;FS=7.018;MLEAC=1;MLEAF=0.500;MQ=60.00;MQRankSum=0.000;QD=19.13;ReadPosRankSum=-1.872;SOR=1.090	GT:AD:DP:GQ:PL	0/1:77,79:156:99:2991,0,2826	4	5.11791	5.14664	0.914631	2.22626	2.05694	4.20006
d225005	Ib	bun	FBgn0259176	-1	2L:12540793	1	2L	12540793	A	T	TA	FALSE	86	2828.03	AC=2;AF=1.00;AN=2;DP=86;ExcessHet=3.0103;FS=0.000;MLEAC=2;MLEAF=1.00;MQ=60.00;QD=32.88;SOR=1.005	GT:AD:DP:GQ:PL	1/1:0,86:86:99:2842,258,0	4	6.94439	6.97053	0.809548	5.18377	5.42671	4.20006
d225005	Ib	CG9932	FBgn0262160	-1	2L:13059791	1	2L	13059791	A	G	TC	FALSE	28	946.03	AC=2;AF=1.00;AN=2;DP=28;ExcessHet=3.0103;FS=0.000;MLEAC=2;MLEAF=1.00;MQ=60.00;QD=33.79;SOR=3.767	GT:AD:DP:GQ:PL	1/1:0,28:28:83:960,83,0	4	1.71383	1.76726	0.507386	1.89731	1.97145	4.20006
d225005	Ib	CG16974	FBgn0032479	-1	2L:13185138	1	2L	13185138	C	T	GA	FALSE	59	1853.03	AC=2;AF=1.00;AN=2;DP=59;ExcessHet=3.0103;FS=0.000;MLEAC=2;MLEAF=1.00;MQ=60.00;QD=31.41;SOR=1.773	GT:AD:DP:GQ:PL	1/1:0,59:59:99:1867,176,0	4	3.8107	3.63081	0.755289	1.61977	1.51626	4.20006
d225005	Ib	RpL24	FBgn0032518	-1	2L:13394241	0.60218	2L	13394241	C	T	GA	FALSE	367	6276.6	AC=1;AF=0.500;AN=2;BaseQRankSum=-10.647;DP=367;ExcessHet=3.0103;FS=1.768;MLEAC=1;MLEAF=0.500;MQ=60.00;MQRankSum=0.000;QD=17.10;ReadPosRankSum=2.735;SOR=0.837	GT:AD:DP:GQ:PL	0/1:146,221:367:99:6284,0,4475	4	11.1577	11.3686	0.00168671	10.7441	10.5771	4.20006
d225005	Ib	chinmo	FBgn0086758	1	2L:1700658	0.800781	2L	1700658	G	A	GA	FALSE	256	6197.6	AC=1;AF=0.500;AN=2;BaseQRankSum=-5.471;DP=256;ExcessHet=3.0103;FS=11.679;MLEAC=1;MLEAF=0.500;MQ=60.00;MQRankSum=0.000;QD=24.21;ReadPosRankSum=1.698;SOR=1.574	GT:AD:DP:GQ:PL	0/1:51,205:256:99:6205,0,956	4	4.89124	3.28942	2.254e-05	2.01378	1.91915	4.20006
d225005	Ib	chinmo	FBgn0086758	1	2L:1702126	0.575342	2L	1702126	T	C	TC	FALSE	73	1400.6	AC=1;AF=0.500;AN=2;BaseQRankSum=1.761;DP=73;ExcessHet=3.0103;FS=16.443;MLEAC=1;MLEAF=0.500;MQ=60.00;MQRankSum=0.000;QD=19.19;ReadPosRankSum=0.840;SOR=2.991	GT:AD:DP:GQ:PL	0/1:31,42:73:99:1408,0,994	4	4.89124	3.28942	2.254e-05	2.01378	1.91915	4.20006
d225005	Ib	chinmo	FBgn0086758	1	2L:1702167	0.545455	2L	1702167	A	C	AC	FALSE	77	1148.6	AC=1;AF=0.500;AN=2;BaseQRankSum=5.296;DP=77;ExcessHet=3.0103;FS=30.967;MLEAC=1;MLEAF=0.500;MQ=60.00;MQRankSum=0.000;QD=14.92;ReadPosRankSum=0.211;SOR=4.631	GT:AD:DP:GQ:PL	0/1:35,42:77:99:1156,0,874	4	4.89124	3.28942	2.254e-05	2.01378	1.91915	4.20006
d225005	Ib	cpb	FBgn0011570	1	2L:1705037	1	2L	1705037	C	T	CT	FALSE	48	2185.03	AC=2;AF=1.00;AN=2;DP=48;ExcessHet=3.0103;FS=0.000;MLEAC=2;MLEAF=1.00;MQ=60.00;QD=25.57;SOR=1.863	GT:AD:DP:GQ:PL	1/1:0,48:48:99:2199,150,0	4	3.85581	4.22635	0.953641	3.46312	3.30249	4.20006
d225005	Ib	cpb	FBgn0011570	1	2L:1705436	1	2L	1705436	C	A	CA	FALSE	32	996.03	AC=2;AF=1.00;AN=2;DP=32;ExcessHet=3.0103;FS=0.000;MLEAC=2;MLEAF=1.00;MQ=60.00;QD=31.13;SOR=1.284	GT:AD:DP:GQ:PL	1/1:0,32:32:94:1010,94,0	4	3.85581	4.22635	0.953641	3.46312	3.30249	4.20006
d225005	Ib	cpb	FBgn0011570	1	2L:1705978	0.972222	2L	1705978	C	A	CA	FALSE	36	1060.03	AC=2;AF=1.00;AN=2;BaseQRankSum=1.817;DP=36;ExcessHet=3.0103;FS=0.000;MLEAC=2;MLEAF=1.00;MQ=60.00;MQRankSum=0.000;QD=29.45;ReadPosRankSum=-0.193;SOR=0.874	GT:AD:DP:GQ:PL	1/1:1,35:36:96:1074,96,0	4	3.85581	4.22635	0.953641	3.46312	3.30249	4.20006
d225005	Ib	kis	FBgn0266557	-1	2L:240642	0.291667	2L	240642	C	A	GT	FALSE	96	475.6	AC=1;AF=0.500;AN=2;BaseQRankSum=-5.679;DP=96;ExcessHet=3.0103;FS=15.938;MLEAC=1;MLEAF=0.500;MQ=60.00;MQRankSum=0.000;QD=4.95;ReadPosRankSum=-4.243;SOR=1.817	GT:AD:DP:GQ:PL	0/1:68,28:96:99:483,0,2024	4	4.15093	4.36337	0.701362	1.63488	1.43742	4.20006
d225005	Ib	Hydr2	FBgn0014906	1	2L:3163979	1	2L	3163979	T	C	TC	FALSE	17	589.03	AC=2;AF=1.00;AN=2;DP=17;ExcessHet=3.0103;FS=0.000;MLEAC=2;MLEAF=1.00;MQ=60.00;QD=34.65;SOR=1.739	GT:AD:DP:GQ:PL	1/1:0,17:17:51:603,51,0	4	2.47882	1.81392	0.0606409	0.927258	1.49242	4.20006
d225005	Ib	Hydr2	FBgn0014906	1	2L:3164021	1	2L	3164021	T	G	TG	FALSE	12	414.02	AC=2;AF=1.00;AN=2;DP=12;ExcessHet=3.0103;FS=0.000;MLEAC=2;MLEAF=1.00;MQ=60.00;QD=34.50;SOR=0.693	GT:AD:DP:GQ:PL	1/1:0,12:12:36:428,36,0	4	2.47882	1.81392	0.0606409	0.927258	1.49242	4.20006
d225005	Ib	CG9662	FBgn0031529	-1	2L:3376197	0.45	2L	3376197	G	A	CT	FALSE	160	1862.6	AC=1;AF=0.500;AN=2;BaseQRankSum=-8.080;DP=160;ExcessHet=3.0103;FS=2.844;MLEAC=1;MLEAF=0.500;MQ=60.00;MQRankSum=0.000;QD=11.64;ReadPosRankSum=0.846;SOR=0.486	GT:AD:DP:GQ:PL	0/1:88,72:160:99:1870,0,2765	4	4.79971	4.26303	0.58721	2.25071	2.37554	4.20006
d225005	Ib	CG9662	FBgn0031529	-1	2L:3376230	0.457143	2L	3376230	C	G	GC	FALSE	140	2178.6	AC=1;AF=0.500;AN=2;BaseQRankSum=-0.318;DP=140;ExcessHet=3.0103;FS=7.580;MLEAC=1;MLEAF=0.500;MQ=60.00;MQRankSum=0.000;QD=15.56;ReadPosRankSum=0.736;SOR=0.330	GT:AD:DP:GQ:PL	0/1:76,64:140:99:2186,0,2977	4	4.79971	4.26303	0.58721	2.25071	2.37554	4.20006
d225005	Ib	CG9662	FBgn0031529	-1	2L:3376254	0.507853	2L	3376254	A	G	TC	FALSE	191	3305.6	AC=1;AF=0.500;AN=2;BaseQRankSum=6.726;DP=191;ExcessHet=3.0103;FS=8.326;MLEAC=1;MLEAF=0.500;MQ=60.00;MQRankSum=0.000;QD=17.31;ReadPosRankSum=1.084;SOR=1.214	GT:AD:DP:GQ:PL	0/1:94,97:191:99:3313,0,3352	4	4.79971	4.26303	0.58721	2.25071	2.37554	4.20006
d225005	Ib	CG17593	FBgn0031544	1	2L:3516924	0.478723	2L	3516924	G	A	GA	FALSE	94	1204.6	AC=1;AF=0.500;AN=2;BaseQRankSum=-2.408;DP=94;ExcessHet=3.0103;FS=8.486;MLEAC=1;MLEAF=0.500;MQ=60.00;MQRankSum=0.000;QD=12.81;ReadPosRankSum=1.523;SOR=0.241	GT:AD:DP:GQ:PL	0/1:49,45:94:99:1212,0,1410	4	3.01456	2.37419	0.440131	1.92392	1.63878	4.20006
d225005	Ib	RpL40	FBgn0003941	1	2L:4228231	0.449914	2L	4228231	G	A	GA	FALSE	1747	21893.6	AC=1;AF=0.500;AN=2;BaseQRankSum=-19.129;DP=1747;ExcessHet=3.0103;FS=0.000;MLEAC=1;MLEAF=0.500;MQ=60.00;MQRankSum=0.000;QD=12.53;ReadPosRankSum=-0.937;SOR=0.724	GT:AD:DP:GQ:PL	0/1:961,786:1747:99:21901,0,29128	4	12.1664	12.1374	0.69258	11.4574	11.4142	4.20006
d225005	Ib	tutl	FBgn0010473	1	2L:4322840	1	2L	4322840	A	T	AT	FALSE	50	1563.03	AC=2;AF=1.00;AN=2;DP=50;ExcessHet=3.0103;FS=0.000;MLEAC=2;MLEAF=1.00;MQ=60.00;QD=31.26;SOR=1.270	GT:AD:DP:GQ:PL	1/1:0,50:50:99:1577,149,0	4	4.0959	4.22725	0.910584	0.165688	0.146746	4.20006
d225005	Ib	fipi	FBgn0031627	-1	2L:4735074	0.481605	2L	4735074	A	T	TA	FALSE	299	5153.6	AC=1;AF=0.500;AN=2;BaseQRankSum=6.227;DP=299;ExcessHet=3.0103;FS=0.451;MLEAC=1;MLEAF=0.500;MQ=60.00;MQRankSum=0.000;QD=17.24;ReadPosRankSum=0.078;SOR=0.739	GT:AD:DP:GQ:PL	0/1:155,144:299:99:5161,0,7944	4	5.70931	5.32823	0.250204	0.307762	0.421432	4.20006
d225005	Ib	fipi	FBgn0031627	-1	2L:4735376	0.633621	2L	4735376	G	A	CT	FALSE	234	4141.6	AC=1;AF=0.500;AN=2;BaseQRankSum=-6.943;DP=234;ExcessHet=3.0103;FS=28.118;MLEAC=1;MLEAF=0.500;MQ=60.00;MQRankSum=0.000;QD=17.85;ReadPosRankSum=-2.150;SOR=0.236	GT:AD:DP:GQ:PL	0/1:85,147:232:99:4149,0,2514	4	5.70931	5.32823	0.250204	0.307762	0.421432	4.20006
d225005	Ib	SelT	FBgn0031670	1	2L:5011196	0.618497	2L	5011196	A	C	AC	FALSE	173	3284.6	AC=1;AF=0.500;AN=2;BaseQRankSum=5.649;DP=173;ExcessHet=3.0103;FS=4.850;MLEAC=1;MLEAF=0.500;MQ=60.00;MQRankSum=0.000;QD=18.99;ReadPosRankSum=3.402;SOR=0.411	GT:AD:DP:GQ:PL	0/1:66,107:173:99:3292,0,1608	4	6.33383	6.84417	0.699678	5.28965	5.24848	4.20006
d225005	Ib	CG31650	FBgn0031673	-1	2L:5040833	0.504348	2L	5040833	C	A	GT	FALSE	115	1536.6	AC=1;AF=0.500;AN=2;BaseQRankSum=-6.633;DP=115;ExcessHet=3.0103;FS=26.076;MLEAC=1;MLEAF=0.500;MQ=60.00;MQRankSum=0.000;QD=13.36;ReadPosRankSum=3.151;SOR=1.949	GT:AD:DP:GQ:PL	0/1:57,58:115:99:1544,0,1738	4	4.95708	5.02313	0.952346	2.11362	1.73761	4.20006
d225005	Ib	CG14024	FBgn0031697	-1	2L:5312887	0.464286	2L	5312887	G	T	CA	FALSE	112	1454.6	AC=1;AF=0.500;AN=2;BaseQRankSum=-5.813;DP=112;ExcessHet=3.0103;FS=3.481;MLEAC=1;MLEAF=0.500;MQ=60.00;MQRankSum=0.000;QD=12.99;ReadPosRankSum=-2.070;SOR=0.705	GT:AD:DP:GQ:PL	0/1:60,52:112:99:1462,0,1960	4	4.1084	4.81184	0.222063	0.0890449	0.126785	4.20006
d225005	Ib	RpS13	FBgn0010265	-1	2L:8363926	0.504219	2L	8363926	C	A	GT	FALSE	1423	19219.6	AC=1;AF=0.500;AN=2;BaseQRankSum=-20.908;DP=1423;ExcessHet=3.0103;FS=0.555;MLEAC=1;MLEAF=0.500;MQ=60.00;MQRankSum=0.000;QD=13.52;ReadPosRankSum=1.207;SOR=0.799	GT:AD:DP:GQ:PL	0/1:705,717:1422:99:19227,0,21156	4	12.5537	12.6411	0.256312	12.0036	11.9644	4.20006
d225005	Ib	Gdi	FBgn0004868	-1	2L:9494388	0.644737	2L	9494388	G	A	CT	FALSE	380	6790.6	AC=1;AF=0.500;AN=2;BaseQRankSum=-4.591;DP=380;ExcessHet=3.0103;FS=2.832;MLEAC=1;MLEAF=0.500;MQ=60.00;MQRankSum=0.000;QD=17.87;ReadPosRankSum=-0.447;SOR=0.704	GT:AD:DP:GQ:PL	0/1:135,245:380:99:6798,0,3566	4	8.05437	8.41484	0.842776	4.8483	4.88893	4.20006
d225005	Ib	Trx2	FBgn0040070	1	2L:9615775	0.204473	2L	9615775	G	T	GT	FALSE	942	2972.6	AC=1;AF=0.500;AN=2;BaseQRankSum=-11.244;DP=942;ExcessHet=3.0103;FS=9.671;MLEAC=1;MLEAF=0.500;MQ=60.00;MQRankSum=0.000;QD=3.17;ReadPosRankSum=3.160;SOR=0.257	GT:AD:DP:GQ:PL	0/1:747,192:939:99:2980,0,21810	4	9.69634	9.67944	0.851976	5.15857	5.52398	4.20006
d225005	Ib	CG2269	FBgn0033484	1	2R:10090645	0.735294	2R	10090645	G	C	GC	FALSE	170	4167.6	AC=1;AF=0.500;AN=2;BaseQRankSum=5.974;DP=170;ExcessHet=3.0103;FS=4.258;MLEAC=1;MLEAF=0.500;MQ=60.00;MQRankSum=0.000;QD=24.52;ReadPosRankSum=-0.787;SOR=0.397	GT:AD:DP:GQ:PL	0/1:45,125:170:99:4175,0,1113	4	5.19569	6.43794	0.0154284	0.210855	0.230656	4.20006
d225005	Ib	CG2269	FBgn0033484	1	2R:10094332	0.578512	2R	10094332	G	A	GA	FALSE	121	2006.6	AC=1;AF=0.500;AN=2;BaseQRankSum=-6.183;DP=121;ExcessHet=3.0103;FS=8.490;MLEAC=1;MLEAF=0.500;MQ=60.00;MQRankSum=0.000;QD=16.58;ReadPosRankSum=-0.613;SOR=0.395	GT:AD:DP:GQ:PL	0/1:51,70:121:99:2014,0,1571	4	5.19569	6.43794	0.0154284	0.210855	0.230656	4.20006
d225005	Ib	CG2269	FBgn0033484	1	2R:10094389	0.534722	2R	10094389	A	C	AC	FALSE	144	2074.6	AC=1;AF=0.500;AN=2;BaseQRankSum=5.920;DP=144;ExcessHet=3.0103;FS=6.076;MLEAC=1;MLEAF=0.500;MQ=60.00;MQRankSum=0.000;QD=14.41;ReadPosRankSum=1.291;SOR=0.631	GT:AD:DP:GQ:PL	0/1:67,77:144:99:2082,0,1517	4	5.19569	6.43794	0.0154284	0.210855	0.230656	4.20006
d225005	Ib	Pfk	FBgn0003071	1	2R:10116445	1	2R	10116445	G	A	GA	FALSE	34	1090.03	AC=2;AF=1.00;AN=2;DP=34;ExcessHet=3.0103;FS=0.000;MLEAC=2;MLEAF=1.00;MQ=60.00;QD=32.06;SOR=1.085	GT:AD:DP:GQ:PL	1/1:0,34:34:99:1104,102,0	4	4.37009	3.56083	0.31389	3.82933	4.24604	4.20006
d225005	Ib	Pfk	FBgn0003071	1	2R:10117050	1	2R	10117050	G	T	GT	FALSE	51	1538.03	AC=2;AF=1.00;AN=2;DP=51;ExcessHet=3.0103;FS=0.000;MLEAC=2;MLEAF=1.00;MQ=60.00;QD=30.16;SOR=1.436	GT:AD:DP:GQ:PL	1/1:0,51:51:99:1552,152,0	4	4.37009	3.56083	0.31389	3.82933	4.24604	4.20006
d225005	Ib	Galphao	FBgn0001122	1	2R:10461755	0.482759	2R	10461755	T	C	TC	FALSE	92	1168.6	AC=1;AF=0.500;AN=2;BaseQRankSum=4.610;DP=92;ExcessHet=3.0103;FS=0.000;MLEAC=1;MLEAF=0.500;MQ=60.00;MQRankSum=0.000;QD=13.43;ReadPosRankSum=-1.343;SOR=0.696	GT:AD:DP:GQ:PL	0/1:45,42:87:99:1176,0,1135	4	5.27539	5.64569	0.388493	0.648983	0.676221	4.20006
d225005	Ib	Galphao	FBgn0001122	1	2R:10464906	1	2R	10464906	G	A	GA	FALSE	59	1939.03	AC=2;AF=1.00;AN=2;DP=59;ExcessHet=3.0103;FS=0.000;MLEAC=2;MLEAF=1.00;MQ=60.00;QD=32.86;SOR=0.950	GT:AD:DP:GQ:PL	1/1:0,59:59:99:1953,177,0	4	5.27539	5.64569	0.388493	0.648983	0.676221	4.20006
d225005	Ib	wde	FBgn0027499	-1	2R:10805304	1	2R	10805304	C	A	GT	FALSE	37	1221.03	AC=2;AF=1.00;AN=2;DP=37;ExcessHet=3.0103;FS=0.000;MLEAC=2;MLEAF=1.00;MQ=60.00;QD=33.00;SOR=0.984	GT:AD:DP:GQ:PL	1/1:0,37:37:99:1235,111,0	4	2.05105	2.37689	0.751554	0.762529	0.689263	4.20006
d225005	Ib	wde	FBgn0027499	-1	2R:10805625	1	2R	10805625	C	T	GA	FALSE	35	1132.03	AC=2;AF=1.00;AN=2;DP=35;ExcessHet=3.0103;FS=0.000;MLEAC=2;MLEAF=1.00;MQ=60.00;QD=32.34;SOR=0.869	GT:AD:DP:GQ:PL	1/1:0,35:35:99:1146,104,0	4	2.05105	2.37689	0.751554	0.762529	0.689263	4.20006
d225005	Ib	RpS15Ab	FBgn0033555	1	2R:10821796	1	2R	10821796	G	T	GT	FALSE	15	408.03	AC=2;AF=1.00;AN=2;DP=15;ExcessHet=3.0103;FS=0.000;MLEAC=2;MLEAF=1.00;MQ=60.00;QD=27.20;SOR=0.818	GT:AD:DP:GQ:PL	1/1:0,15:15:45:422,45,0	4	3.76529	3.1313	0.134754	5.69163	5.75158	4.20006
d225005	Ib	RpS15Ab	FBgn0033555	1	2R:10821843	1	2R	10821843	C	T	CT	FALSE	13	387.02	AC=2;AF=1.00;AN=2;DP=13;ExcessHet=3.0103;FS=0.000;MLEAC=2;MLEAF=1.00;MQ=60.00;QD=29.77;SOR=2.147	GT:AD:DP:GQ:PL	1/1:0,13:13:39:401,39,0	4	3.76529	3.1313	0.134754	5.69163	5.75158	4.20006
d225005	Ib	RpS15Ab	FBgn0033555	1	2R:10822076	1	2R	10822076	G	A	GA	FALSE	22	570.02	AC=2;AF=1.00;AN=2;DP=22;ExcessHet=3.0103;FS=0.000;MLEAC=2;MLEAF=1.00;MQ=60.00;QD=28.50;SOR=0.892	GT:AD:DP:GQ:PL	1/1:0,20:20:60:584,60,0	4	3.76529	3.1313	0.134754	5.69163	5.75158	4.20006
d225005	Ib	RpS15Ab	FBgn0033555	1	2R:10822209	1	2R	10822209	C	A	CA	FALSE	13	512.02	AC=2;AF=1.00;AN=2;DP=13;ExcessHet=3.0103;FS=0.000;MLEAC=2;MLEAF=1.00;MQ=60.00;QD=24.83;SOR=5.283	GT:AD:DP:GQ:PL	1/1:0,13:13:39:526,39,0	4	3.76529	3.1313	0.134754	5.69163	5.75158	4.20006
d225005	Ib	nclb	FBgn0263510	1	2R:10876325	1	2R	10876325	C	T	CT	FALSE	41	1399.03	AC=2;AF=1.00;AN=2;DP=41;ExcessHet=3.0103;FS=0.000;MLEAC=2;MLEAF=1.00;MQ=60.00;QD=34.12;SOR=0.843	GT:AD:DP:GQ:PL	1/1:0,41:41:99:1413,123,0	4	2.63709	1.58521	0.250542	0.492658	0.759112	4.20006
d225005	Ib	nclb	FBgn0263510	1	2R:10877045	1	2R	10877045	G	C	GC	FALSE	36	1100.03	AC=2;AF=1.00;AN=2;DP=36;ExcessHet=3.0103;FS=0.000;MLEAC=2;MLEAF=1.00;MQ=60.00;QD=30.56;SOR=1.061	GT:AD:DP:GQ:PL	1/1:0,36:36:99:1114,106,0	4	2.63709	1.58521	0.250542	0.492658	0.759112	4.20006
d225005	Ib	luna	FBgn0040765	-1	2R:11106661	1	2R	11106661	A	T	TA	FALSE	45	1998.03	AC=2;AF=1.00;AN=2;DP=45;ExcessHet=3.0103;FS=0.000;MLEAC=2;MLEAF=1.00;MQ=60.00;QD=33.99;SOR=1.559	GT:AD:DP:GQ:PL	1/1:0,45:45:99:2012,150,0	4	2.56231	1.58477	0.00374606	1.19796	1.18173	4.20006
d225005	Ib	metro	FBgn0050021	-1	2R:11227317	1	2R	11227317	A	G	TC	FALSE	125	4237.03	AC=2;AF=1.00;AN=2;DP=125;ExcessHet=3.0103;FS=0.000;MLEAC=2;MLEAF=1.00;MQ=60.00;QD=33.90;SOR=0.775	GT:AD:DP:GQ:PL	1/1:0,125:125:99:4251,374,0	4	3.99733	2.85182	0.459297	1.44152	1.38535	4.20006
d225005	Ib	fl(2)d	FBgn0000662	-1	2R:13824501	1	2R	13824501	G	T	CA	FALSE	23	721.03	AC=2;AF=1.00;AN=2;DP=23;ExcessHet=3.0103;FS=0.000;MLEAC=2;MLEAF=1.00;MQ=60.00;QD=31.35;SOR=1.426	GT:AD:DP:GQ:PL	1/1:0,23:23:69:735,69,0	4	2.60305	2.3359	0.329402	1.82327	1.73325	4.20006
d225005	Ib	CG6329	FBgn0033872	1	2R:13829759	0.529412	2R	13829759	G	T	GT	FALSE	51	744.6	AC=1;AF=0.500;AN=2;BaseQRankSum=-2.208;DP=51;ExcessHet=3.0103;FS=0.000;MLEAC=1;MLEAF=0.500;MQ=60.00;MQRankSum=0.000;QD=14.60;ReadPosRankSum=-2.203;SOR=0.748	GT:AD:DP:GQ:PL	0/1:24,27:51:99:752,0,680	4	6.30782	5.19838	0.0246684	0.326178	0.229277	4.20006
d225005	Ib	CG6329	FBgn0033872	1	2R:13832058	0.624277	2R	13832058	A	T	AT	FALSE	173	4273.6	AC=1;AF=0.500;AN=2;BaseQRankSum=-3.988;DP=173;ExcessHet=3.0103;FS=4.595;MLEAC=1;MLEAF=0.500;MQ=60.00;MQRankSum=0.000;QD=24.70;ReadPosRankSum=-1.249;SOR=0.643	GT:AD:DP:GQ:PL	0/1:65,108:173:99:4281,0,2617	4	6.30782	5.19838	0.0246684	0.326178	0.229277	4.20006
d225005	Ib	CG6329	FBgn0033872	1	2R:13832088	0.664516	2R	13832088	C	T	CT	FALSE	155	2900.6	AC=1;AF=0.500;AN=2;BaseQRankSum=-7.435;DP=155;ExcessHet=3.0103;FS=15.880;MLEAC=1;MLEAF=0.500;MQ=60.00;MQRankSum=0.000;QD=18.71;ReadPosRankSum=0.617;SOR=1.160	GT:AD:DP:GQ:PL	0/1:52,103:155:99:2908,0,1416	4	6.30782	5.19838	0.0246684	0.326178	0.229277	4.20006
d225005	Ib	CG6329	FBgn0033872	1	2R:13832486	0.774725	2R	13832486	G	A	GA	FALSE	182	4246.6	AC=1;AF=0.500;AN=2;BaseQRankSum=-2.804;DP=182;ExcessHet=3.0103;FS=3.206;MLEAC=1;MLEAF=0.500;MQ=60.00;MQRankSum=0.000;QD=23.33;ReadPosRankSum=1.690;SOR=0.750	GT:AD:DP:GQ:PL	0/1:41,141:182:99:4254,0,869	4	6.30782	5.19838	0.0246684	0.326178	0.229277	4.20006
d225005	Ib	CG6357	FBgn0033875	1	2R:13840246	0.619718	2R	13840246	C	A	CA	FALSE	71	1773.6	AC=1;AF=0.500;AN=2;BaseQRankSum=-4.676;DP=71;ExcessHet=3.0103;FS=2.017;MLEAC=1;MLEAF=0.500;MQ=60.00;MQRankSum=0.000;QD=24.98;ReadPosRankSum=-1.730;SOR=0.466	GT:AD:DP:GQ:PL	0/1:27,44:71:99:1781,0,974	4	1.58216	0.957686	0.219023	3.11342	3.49411	4.20006
d225005	Ib	CG6357	FBgn0033875	1	2R:13840253	0.680412	2R	13840253	C	T	CT	FALSE	97	2268.6	AC=1;AF=0.500;AN=2;BaseQRankSum=-5.981;DP=97;ExcessHet=3.0103;FS=9.113;MLEAC=1;MLEAF=0.500;MQ=60.00;MQRankSum=0.000;QD=23.39;ReadPosRankSum=-2.572;SOR=0.215	GT:AD:DP:GQ:PL	0/1:31,66:97:99:2276,0,1062	4	1.58216	0.957686	0.219023	3.11342	3.49411	4.20006
d225005	Ib	CG6357	FBgn0033875	1	2R:13840392	0.752066	2R	13840392	C	G	CG	FALSE	121	3846.6	AC=1;AF=0.500;AN=2;BaseQRankSum=1.417;DP=121;ExcessHet=3.0103;FS=10.442;MLEAC=1;MLEAF=0.500;MQ=60.00;MQRankSum=0.000;QD=31.79;ReadPosRankSum=-2.125;SOR=0.941	GT:AD:DP:GQ:PL	0/1:30,91:121:99:3854,0,1019	4	1.58216	0.957686	0.219023	3.11342	3.49411	4.20006
d225005	Ib	Prosap	FBgn0040752	-1	2R:14140343	0.166667	2R	14140343	C	T	GA	FALSE	102	432.6	AC=1;AF=0.500;AN=2;BaseQRankSum=-4.570;DP=102;ExcessHet=3.0103;FS=53.213;MLEAC=1;MLEAF=0.500;MQ=60.00;MQRankSum=0.000;QD=4.24;ReadPosRankSum=-2.516;SOR=2.066	GT:AD:DP:GQ:PL	0/1:85,17:102:99:440,0,3470	4	3.67189	3.09119	0.0790468	0.867644	0.923605	4.20006
d225005	Ib	Arc1	FBgn0033926	-1	2R:14358479	0.513587	2R	14358479	C	T	GA	FALSE	369	4445.6	AC=1;AF=0.500;AN=2;BaseQRankSum=-9.074;DP=369;ExcessHet=3.0103;FS=2.134;MLEAC=1;MLEAF=0.500;MQ=60.00;MQRankSum=0.000;QD=12.08;ReadPosRankSum=-2.060;SOR=0.501	GT:AD:DP:GQ:PL	0/1:179,189:368:99:4453,0,5414	4	8.8001	10.4298	1.75221e-12	6.99997	7.09814	4.20006
d225005	Ib	Arc1	FBgn0033926	-1	2R:14358573	0.363971	2R	14358573	T	G	AC	FALSE	272	2598.6	AC=1;AF=0.500;AN=2;BaseQRankSum=10.037;DP=272;ExcessHet=3.0103;FS=1.001;MLEAC=1;MLEAF=0.500;MQ=60.00;MQRankSum=0.000;QD=9.55;ReadPosRankSum=-2.424;SOR=0.896	GT:AD:DP:GQ:PL	0/1:173,99:272:99:2606,0,4604	4	8.8001	10.4298	1.75221e-12	6.99997	7.09814	4.20006
d225005	Ib	Arc1	FBgn0033926	-1	2R:14359830	0.375	2R	14359830	G	A	CT	FALSE	432	4098.6	AC=1;AF=0.500;AN=2;BaseQRankSum=-3.333;DP=432;ExcessHet=3.0103;FS=0.000;MLEAC=1;MLEAF=0.500;MQ=60.00;MQRankSum=0.000;QD=9.49;ReadPosRankSum=1.827;SOR=0.643	GT:AD:DP:GQ:PL	0/1:270,162:432:99:4106,0,8074	4	8.8001	10.4298	1.75221e-12	6.99997	7.09814	4.20006
d225005	Ib	phyl	FBgn0013725	-1	2R:14428349	1	2R	14428349	C	T	GA	FALSE	55	2243.03	AC=2;AF=1.00;AN=2;DP=55;ExcessHet=3.0103;FS=0.000;MLEAC=2;MLEAF=1.00;MQ=60.00;QD=33.04;SOR=1.371	GT:AD:DP:GQ:PL	1/1:0,55:55:99:2257,165,0	4	4.04679	3.25023	0.0947615	0.216102	0.120353	4.20006
d225005	Ib	Rpn6	FBgn0028689	-1	2R:14751310	0.711712	2R	14751310	A	G	TC	FALSE	111	2449.6	AC=1;AF=0.500;AN=2;BaseQRankSum=4.439;DP=111;ExcessHet=3.0103;FS=8.366;MLEAC=1;MLEAF=0.500;MQ=60.00;MQRankSum=0.000;QD=22.07;ReadPosRankSum=-0.519;SOR=1.008	GT:AD:DP:GQ:PL	0/1:32,79:111:99:2457,0,722	4	5.22049	6.17786	0.412321	5.26645	4.73751	4.20006
d225005	Ib	Rpn6	FBgn0028689	-1	2R:14751322	0.694444	2R	14751322	G	A	CT	FALSE	108	2197.6	AC=1;AF=0.500;AN=2;BaseQRankSum=-1.306;DP=108;ExcessHet=3.0103;FS=12.214;MLEAC=1;MLEAF=0.500;MQ=60.00;MQRankSum=0.000;QD=20.35;ReadPosRankSum=-0.425;SOR=0.755	GT:AD:DP:GQ:PL	0/1:33,75:108:99:2205,0,858	4	5.22049	6.17786	0.412321	5.26645	4.73751	4.20006
d225005	Ib	Rpn6	FBgn0028689	-1	2R:14751340	0.706422	2R	14751340	C	T	GA	FALSE	109	3372.6	AC=1;AF=0.500;AN=2;BaseQRankSum=-6.432;DP=109;ExcessHet=3.0103;FS=5.213;MLEAC=1;MLEAF=0.500;MQ=60.00;MQRankSum=0.000;QD=30.94;ReadPosRankSum=-0.871;SOR=0.503	GT:AD:DP:GQ:PL	0/1:32,77:109:99:3380,0,1214	4	5.22049	6.17786	0.412321	5.26645	4.73751	4.20006
d225005	Ib	ND-B15	FBgn0033961	1	2R:14756883	0.186667	2R	14756883	T	C	TC	FALSE	225	852.6	AC=1;AF=0.500;AN=2;BaseQRankSum=5.092;DP=225;ExcessHet=3.0103;FS=0.000;MLEAC=1;MLEAF=0.500;MQ=60.00;MQRankSum=0.000;QD=3.79;ReadPosRankSum=-1.344;SOR=0.723	GT:AD:DP:GQ:PL	0/1:183,42:225:99:860,0,5418	4	6.23063	6.18795	0.935588	5.63755	5.75018	4.20006
d225005	Ib	Spred	FBgn0020767	-1	2R:14760649	0.368421	2R	14760649	T	A	AT	FALSE	76	706.6	AC=1;AF=0.500;AN=2;BaseQRankSum=-3.932;DP=76;ExcessHet=3.0103;FS=3.231;MLEAC=1;MLEAF=0.500;MQ=60.00;MQRankSum=0.000;QD=9.30;ReadPosRankSum=1.122;SOR=1.179	GT:AD:DP:GQ:PL	0/1:48,28:76:99:714,0,1480	4	4.17724	4.21566	0.897783	1.14328	0.951162	4.20006
d225005	Ib	igl	FBgn0013467	1	2R:15155874	0.357143	2R	15155874	A	T	AT	FALSE	70	618.6	AC=1;AF=0.500;AN=2;BaseQRankSum=3.374;DP=70;ExcessHet=3.0103;FS=2.153;MLEAC=1;MLEAF=0.500;MQ=60.00;MQRankSum=0.000;QD=8.84;ReadPosRankSum=0.744;SOR=1.044	GT:AD:DP:GQ:PL	0/1:45,25:70:99:626,0,1753	4	4.59254	5.58549	0.494189	0.0879829	0.121945	4.20006
d225005	Ib	igl	FBgn0013467	1	2R:15188904	0.940476	2R	15188904	C	T	CT	FALSE	84	2395.03	AC=2;AF=1.00;AN=2;BaseQRankSum=-2.483;DP=84;ExcessHet=3.0103;FS=4.027;MLEAC=2;MLEAF=1.00;MQ=60.00;MQRankSum=0.000;QD=28.51;ReadPosRankSum=-0.781;SOR=0.244	GT:AD:DP:GQ:PL	1/1:5,79:84:76:2409,76,0	4	4.59254	5.58549	0.494189	0.0879829	0.121945	4.20006
d225005	Ib	Diap2	FBgn0015247	-1	2R:15932794	1	2R	15932794	A	G	TC	FALSE	16	523.03	AC=2;AF=1.00;AN=2;DP=16;ExcessHet=3.0103;FS=0.000;MLEAC=2;MLEAF=1.00;MQ=60.00;QD=32.69;SOR=2.049	GT:AD:DP:GQ:PL	1/1:0,16:16:48:537,48,0	4	2.21743	2.14379	0.569937	1.94321	1.78065	4.20006
d225005	Ib	CG8314	FBgn0034057	-1	2R:15989921	1	2R	15989921	A	C	TG	FALSE	44	1570.03	AC=2;AF=1.00;AN=2;DP=44;ExcessHet=3.0103;FS=0.000;MLEAC=2;MLEAF=1.00;MQ=60.00;QD=30.06;SOR=0.784	GT:AD:DP:GQ:PL	1/1:0,44:44:99:1584,132,0	4	3.37659	3.91756	0.729489	2.94954	2.98204	4.20006
d225005	Ib	ATPCL	FBgn0020236	-1	2R:15994473	1	2R	15994473	G	T	CA	FALSE	138	4630.03	AC=2;AF=1.00;AN=2;DP=138;ExcessHet=3.0103;FS=0.000;MLEAC=2;MLEAF=1.00;MQ=60.00;QD=33.55;SOR=0.846	GT:AD:DP:GQ:PL	1/1:0,138:138:99:4644,413,0	4	3.02082	2.76401	0.392183	2.11232	1.97778	4.20006
d225005	Ib	Ufc1	FBgn0034061	-1	2R:16007156	0.293478	2R	16007156	C	G	GC	FALSE	184	1308.6	AC=1;AF=0.500;AN=2;BaseQRankSum=2.737;DP=184;ExcessHet=3.0103;FS=0.000;MLEAC=1;MLEAF=0.500;MQ=60.00;MQRankSum=0.000;QD=7.11;ReadPosRankSum=0.521;SOR=0.693	GT:AD:DP:GQ:PL	0/1:130,54:184:99:1316,0,3870	4	3.89671	4.76406	0.198863	4.33244	4.42744	4.20006
d225005	Ib	Prosbeta1	FBgn0010590	-1	2R:16014304	0.760943	2R	16014304	A	G	TC	FALSE	298	7410.6	AC=1;AF=0.500;AN=2;BaseQRankSum=9.126;DP=298;ExcessHet=3.0103;FS=0.000;MLEAC=1;MLEAF=0.500;MQ=60.00;MQRankSum=0.000;QD=24.95;ReadPosRankSum=-1.249;SOR=0.721	GT:AD:DP:GQ:PL	0/1:71,226:297:99:7418,0,1353	4	7.74825	8.59438	0.615658	8.00597	7.82072	4.20006
d225005	Ib	Ric	FBgn0265605	-1	2R:16107611	0.25	2R	16107611	A	T	TA	FALSE	16	71.6	AC=1;AF=0.500;AN=2;BaseQRankSum=-0.701;DP=16;ExcessHet=3.0103;FS=0.000;MLEAC=1;MLEAF=0.500;MQ=60.00;MQRankSum=0.000;QD=4.48;ReadPosRankSum=-0.182;SOR=0.693	GT:AD:DP:GQ:PL	0/1:12,4:16:79:79,0,634	4	4.76805	4.74994	0.98195	2.18522	1.83667	4.20006
d225005	Ib	Ric	FBgn0265605	-1	2R:16107817	0.765152	2R	16107817	C	T	GA	FALSE	132	2958.6	AC=1;AF=0.500;AN=2;BaseQRankSum=-3.907;DP=132;ExcessHet=3.0103;FS=6.631;MLEAC=1;MLEAF=0.500;MQ=60.00;MQRankSum=0.000;QD=22.41;ReadPosRankSum=0.967;SOR=1.214	GT:AD:DP:GQ:PL	0/1:31,101:132:99:2966,0,699	4	4.76805	4.74994	0.98195	2.18522	1.83667	4.20006
d225005	Ib	Ric	FBgn0265605	-1	2R:16107883	0.842697	2R	16107883	T	G	AC	FALSE	178	5017.6	AC=1;AF=0.500;AN=2;BaseQRankSum=6.491;DP=178;ExcessHet=3.0103;FS=7.440;MLEAC=1;MLEAF=0.500;MQ=60.00;MQRankSum=0.000;QD=28.19;ReadPosRankSum=-1.657;SOR=1.509	GT:AD:DP:GQ:PL	0/1:28,150:178:99:5025,0,383	4	4.76805	4.74994	0.98195	2.18522	1.83667	4.20006
d225005	Ib	Ric	FBgn0265605	-1	2R:16107973	0.836478	2R	16107973	G	A	CT	FALSE	159	4051.6	AC=1;AF=0.500;AN=2;BaseQRankSum=-1.667;DP=159;ExcessHet=3.0103;FS=6.480;MLEAC=1;MLEAF=0.500;MQ=60.00;MQRankSum=0.000;QD=25.48;ReadPosRankSum=1.553;SOR=0.252	GT:AD:DP:GQ:PL	0/1:26,133:159:99:4059,0,441	4	4.76805	4.74994	0.98195	2.18522	1.83667	4.20006
d225005	Ib	Ric	FBgn0265605	-1	2R:16108538	0.539062	2R	16108538	T	A	AT	FALSE	129	1519.6	AC=1;AF=0.500;AN=2;BaseQRankSum=-2.833;DP=129;ExcessHet=3.0103;FS=7.363;MLEAC=1;MLEAF=0.500;MQ=60.00;MQRankSum=0.000;QD=11.87;ReadPosRankSum=1.901;SOR=0.289	GT:AD:DP:GQ:PL	0/1:59,69:128:99:1527,0,1556	4	4.76805	4.74994	0.98195	2.18522	1.83667	4.20006
d225005	Ib	Ric	FBgn0265605	-1	2R:16108576	0.555556	2R	16108576	A	G	TC	FALSE	99	1664.6	AC=1;AF=0.500;AN=2;BaseQRankSum=5.376;DP=99;ExcessHet=3.0103;FS=6.785;MLEAC=1;MLEAF=0.500;MQ=60.00;MQRankSum=0.000;QD=16.81;ReadPosRankSum=-0.919;SOR=0.273	GT:AD:DP:GQ:PL	0/1:44,55:99:99:1672,0,1182	4	4.76805	4.74994	0.98195	2.18522	1.83667	4.20006
d225005	Ib	Ric	FBgn0265605	-1	2R:16108823	0.616071	2R	16108823	T	G	AC	FALSE	112	2190.6	AC=1;AF=0.500;AN=2;BaseQRankSum=5.545;DP=112;ExcessHet=3.0103;FS=3.578;MLEAC=1;MLEAF=0.500;MQ=60.00;MQRankSum=0.000;QD=19.56;ReadPosRankSum=0.220;SOR=0.811	GT:AD:DP:GQ:PL	0/1:43,69:112:99:2198,0,1135	4	4.76805	4.74994	0.98195	2.18522	1.83667	4.20006
d225005	Ib	Ric	FBgn0265605	-1	2R:16108853	0.677083	2R	16108853	G	A	CT	FALSE	96	1905.6	AC=1;AF=0.500;AN=2;BaseQRankSum=-5.386;DP=96;ExcessHet=3.0103;FS=0.000;MLEAC=1;MLEAF=0.500;MQ=60.00;MQRankSum=0.000;QD=19.85;ReadPosRankSum=-0.683;SOR=0.719	GT:AD:DP:GQ:PL	0/1:31,65:96:99:1913,0,812	4	4.76805	4.74994	0.98195	2.18522	1.83667	4.20006
d225005	Ib	Ric	FBgn0265605	-1	2R:16108961	0.675676	2R	16108961	C	T	GA	FALSE	111	2203.6	AC=1;AF=0.500;AN=2;BaseQRankSum=-5.658;DP=111;ExcessHet=3.0103;FS=0.825;MLEAC=1;MLEAF=0.500;MQ=60.00;MQRankSum=0.000;QD=19.85;ReadPosRankSum=1.608;SOR=0.593	GT:AD:DP:GQ:PL	0/1:36,75:111:99:2211,0,970	4	4.76805	4.74994	0.98195	2.18522	1.83667	4.20006
d225005	Ib	Lis-1	FBgn0015754	1	2R:16178898	1	2R	16178898	C	G	CG	FALSE	99	3937.03	AC=2;AF=1.00;AN=2;DP=99;ExcessHet=3.0103;FS=0.000;MLEAC=2;MLEAF=1.00;MQ=60.00;QD=30.98;SOR=2.632	GT:AD:DP:GQ:PL	1/1:0,99:99:99:3951,304,0	4	5.71834	6.47378	0.450267	2.80773	2.38484	4.20006
d225005	Ib	Lis-1	FBgn0015754	1	2R:16178923	1	2R	16178923	A	T	AT	FALSE	57	2436.03	AC=2;AF=1.00;AN=2;DP=57;ExcessHet=3.0103;FS=0.000;MLEAC=2;MLEAF=1.00;MQ=60.00;QD=28.78;SOR=0.877	GT:AD:DP:GQ:PL	1/1:0,57:57:99:2450,177,0	4	5.71834	6.47378	0.450267	2.80773	2.38484	4.20006
d225005	Ib	Lis-1	FBgn0015754	1	2R:16182260	1	2R	16182260	T	C	TC	FALSE	11	396.02	AC=2;AF=1.00;AN=2;DP=11;ExcessHet=3.0103;FS=0.000;MLEAC=2;MLEAF=1.00;MQ=60.00;QD=30.75;SOR=0.859	GT:AD:DP:GQ:PL	1/1:0,11:11:33:410,33,0	4	5.71834	6.47378	0.450267	2.80773	2.38484	4.20006
d225005	Ib	Lis-1	FBgn0015754	1	2R:16182365	1	2R	16182365	G	C	GC	FALSE	11	383.02	AC=2;AF=1.00;AN=2;DP=11;ExcessHet=3.0103;FS=0.000;MLEAC=2;MLEAF=1.00;MQ=60.00;QD=34.82;SOR=2.494	GT:AD:DP:GQ:PL	1/1:0,11:11:33:397,33,0	4	5.71834	6.47378	0.450267	2.80773	2.38484	4.20006
d225005	Ib	Lis-1	FBgn0015754	1	2R:16183749	1	2R	16183749	C	T	CT	FALSE	16	495.03	AC=2;AF=1.00;AN=2;DP=16;ExcessHet=3.0103;FS=0.000;MLEAC=2;MLEAF=1.00;MQ=60.00;QD=30.94;SOR=0.693	GT:AD:DP:GQ:PL	1/1:0,16:16:48:509,48,0	4	5.71834	6.47378	0.450267	2.80773	2.38484	4.20006
d225005	Ib	Lis-1	FBgn0015754	1	2R:16183950	0.127907	2R	16183950	A	T	AT	FALSE	86	228.6	AC=1;AF=0.500;AN=2;BaseQRankSum=-2.386;DP=86;ExcessHet=3.0103;FS=11.417;MLEAC=1;MLEAF=0.500;MQ=60.00;MQRankSum=0.000;QD=2.66;ReadPosRankSum=-0.539;SOR=0.395	GT:AD:DP:GQ:PL	0/1:75,11:86:99:236,0,4952	4	5.71834	6.47378	0.450267	2.80773	2.38484	4.20006
d225005	Ib	Lis-1	FBgn0015754	1	2R:16184668	0.685315	2R	16184668	A	T	AT	FALSE	143	2777.6	AC=1;AF=0.500;AN=2;BaseQRankSum=3.606;DP=143;ExcessHet=3.0103;FS=8.489;MLEAC=1;MLEAF=0.500;MQ=60.00;MQRankSum=0.000;QD=19.42;ReadPosRankSum=2.280;SOR=1.562	GT:AD:DP:GQ:PL	0/1:45,98:143:99:2785,0,1612	4	5.71834	6.47378	0.450267	2.80773	2.38484	4.20006
d225005	Ib	CG42837	FBgn0262026	1	2R:16198143	1	2R	16198143	A	C	AC	FALSE	15	539.03	AC=2;AF=1.00;AN=2;DP=15;ExcessHet=3.0103;FS=0.000;MLEAC=2;MLEAF=1.00;MQ=60.00;QD=23.13;SOR=1.473	GT:AD:DP:GQ:PL	1/1:0,15:15:45:553,45,0	4	2.27932	2.35137	0.939676	3.27598	3.14269	4.20006
d225005	Ib	Ntan1	FBgn0034371	-1	2R:18641543	1	2R	18641543	C	T	GA	FALSE	11	333.02	AC=2;AF=1.00;AN=2;DP=11;ExcessHet=3.0103;FS=0.000;MLEAC=2;MLEAF=1.00;MQ=60.00;QD=30.27;SOR=4.977	GT:AD:DP:GQ:PL	1/1:0,11:11:32:347,32,0	4	1.74806	1.63075	0.811332	0.596864	1.10171	4.20006
d225005	Ib	Ntan1	FBgn0034371	-1	2R:18641716	1	2R	18641716	C	T	GA	FALSE	12	380.02	AC=2;AF=1.00;AN=2;DP=12;ExcessHet=3.0103;FS=0.000;MLEAC=2;MLEAF=1.00;MQ=60.00;QD=31.67;SOR=1.445	GT:AD:DP:GQ:PL	1/1:0,12:12:36:394,36,0	4	1.74806	1.63075	0.811332	0.596864	1.10171	4.20006
d225005	Ib	betaTub56D	FBgn0284243	-1	2R:19447599	0.169265	2R	19447599	C	T	GA	FALSE	2249	8415.6	AC=1;AF=0.500;AN=2;BaseQRankSum=-19.220;DP=2249;ExcessHet=3.0103;FS=61.228;MLEAC=1;MLEAF=0.500;MQ=60.00;MQRankSum=0.000;QD=3.75;ReadPosRankSum=-15.573;SOR=3.891	GT:AD:DP:GQ:PL	0/1:1865,380:2245:99:8423,0,62262	4	12.035	12.8548	5.33957e-11	7.87017	8.37422	4.20006
d225005	Ib	MESK2	FBgn0043070	1	2R:21502311	0.705036	2R	21502311	G	A	GA	FALSE	139	2685.6	AC=1;AF=0.500;AN=2;BaseQRankSum=-8.095;DP=139;ExcessHet=3.0103;FS=14.288;MLEAC=1;MLEAF=0.500;MQ=60.00;MQRankSum=0.000;QD=19.32;ReadPosRankSum=0.864;SOR=1.918	GT:AD:DP:GQ:PL	0/1:41,98:139:99:2693,0,1132	4	6.36504	5.60538	0.0221639	2.21952	2.00932	4.20006
d225005	Ib	RpL23	FBgn0010078	1	2R:22855650	0.438095	2R	22855650	C	T	CT	FALSE	525	5869.6	AC=1;AF=0.500;AN=2;BaseQRankSum=-0.620;DP=525;ExcessHet=3.0103;FS=0.000;MLEAC=1;MLEAF=0.500;MQ=60.00;MQRankSum=0.000;QD=11.18;ReadPosRankSum=0.935;SOR=0.583	GT:AD:DP:GQ:PL	0/1:295,230:525:99:5877,0,8721	4	12.2379	12.3251	0.474476	12.0466	11.972	4.20006
d225005	Ib	DCTN3-p24	FBgn0010622	-1	2R:23061860	0.529412	2R	23061860	G	C	CG	FALSE	340	7053.6	AC=1;AF=0.500;AN=2;BaseQRankSum=1.440;DP=340;ExcessHet=3.0103;FS=45.989;MLEAC=1;MLEAF=0.500;MQ=60.00;MQRankSum=0.000;QD=20.75;ReadPosRankSum=-6.045;SOR=2.116	GT:AD:DP:GQ:PL	0/1:160,180:340:99:7061,0,6063	4	3.63648	3.49445	0.658847	2.08085	1.94357	4.20006
d225005	Ib	DCTN3-p24	FBgn0010622	-1	2R:23061865	0.525568	2R	23061865	T	G	AC	FALSE	352	5747.6	AC=1;AF=0.500;AN=2;BaseQRankSum=10.773;DP=352;ExcessHet=3.0103;FS=35.670;MLEAC=1;MLEAF=0.500;MQ=60.00;MQRankSum=0.000;QD=16.33;ReadPosRankSum=-3.655;SOR=1.861	GT:AD:DP:GQ:PL	0/1:167,185:352:99:5755,0,6447	4	3.63648	3.49445	0.658847	2.08085	1.94357	4.20006
d225005	Ib	DCTN3-p24	FBgn0010622	-1	2R:23061870	0.539359	2R	23061870	T	G	AC	FALSE	343	7332.6	AC=1;AF=0.500;AN=2;BaseQRankSum=8.332;DP=343;ExcessHet=3.0103;FS=28.155;MLEAC=1;MLEAF=0.500;MQ=60.00;MQRankSum=0.000;QD=21.38;ReadPosRankSum=-2.579;SOR=1.664	GT:AD:DP:GQ:PL	0/1:158,185:343:99:7340,0,6157	4	3.63648	3.49445	0.658847	2.08085	1.94357	4.20006
d225005	Ib	l(2)k09913	FBgn0021979	1	2R:23071468	0.144295	2R	23071468	C	T	CT	FALSE	298	420.6	AC=1;AF=0.500;AN=2;BaseQRankSum=-7.400;DP=298;ExcessHet=3.0103;FS=7.226;MLEAC=1;MLEAF=0.500;MQ=60.00;MQRankSum=0.000;QD=1.41;ReadPosRankSum=0.348;SOR=0.797	GT:AD:DP:GQ:PL	0/1:255,43:298:99:428,0,8220	4	5.70037	5.71941	0.821372	4.68951	4.17918	4.20006
d225005	Ib	betaTub60D	FBgn0288686	1	2R:24312033	1	2R	24312033	G	C	GC	FALSE	12	349.02	AC=2;AF=1.00;AN=2;DP=12;ExcessHet=3.0103;FS=0.000;MLEAC=2;MLEAF=1.00;MQ=60.00;QD=29.09;SOR=0.693	GT:AD:DP:GQ:PL	1/1:0,12:12:36:363,36,0	4						4.20006
d225005	Ib	betaTub60D	FBgn0288686	1	2R:24312051	1	2R	24312051	C	T	CT	FALSE	14	387.03	AC=2;AF=1.00;AN=2;DP=14;ExcessHet=3.0103;FS=0.000;MLEAC=2;MLEAF=1.00;MQ=60.00;QD=27.64;SOR=0.693	GT:AD:DP:GQ:PL	1/1:0,14:14:42:401,42,0	4						4.20006
d225005	Ib	CG4612	FBgn0035016	-1	2R:24523195	1	2R	24523195	C	A	GT	FALSE	41	1649.03	AC=2;AF=1.00;AN=2;DP=41;ExcessHet=3.0103;FS=0.000;MLEAC=2;MLEAF=1.00;MQ=60.00;QD=29.44;SOR=2.038	GT:AD:DP:GQ:PL	1/1:0,41:41:99:1663,153,0	4	5.78401	5.60528	0.826696	1.76623	1.27661	4.20006
d225005	Ib	CG4612	FBgn0035016	-1	2R:24524064	0.809524	2R	24524064	C	T	GA	FALSE	273	6058.6	AC=1;AF=0.500;AN=2;BaseQRankSum=-6.129;DP=273;ExcessHet=3.0103;FS=6.742;MLEAC=1;MLEAF=0.500;MQ=60.00;MQRankSum=0.000;QD=22.19;ReadPosRankSum=0.645;SOR=1.184	GT:AD:DP:GQ:PL	0/1:52,221:273:99:6066,0,1001	4	5.78401	5.60528	0.826696	1.76623	1.27661	4.20006
d225005	Ib	Act42A	FBgn0000043	-1	2R:6013911	0.142857	2R	6013911	A	G	TC	FALSE	28	56.6	AC=1;AF=0.500;AN=2;BaseQRankSum=3.011;DP=28;ExcessHet=3.0103;FS=0.000;MLEAC=1;MLEAF=0.500;MQ=60.00;MQRankSum=0.000;QD=2.02;ReadPosRankSum=-1.941;SOR=0.883	GT:AD:DP:GQ:PL	0/1:24,4:28:64:64,0,708	4	8.97693	9.22469	0.0728396	4.58263	5.14286	4.20006
d225005	Ib	EcR	FBgn0000546	-1	2R:6092515	0.571429	2R	6092515	T	A	AT	FALSE	21	469.6	AC=1;AF=0.500;AN=2;BaseQRankSum=3.657;DP=21;ExcessHet=3.0103;FS=22.082;MLEAC=1;MLEAF=0.500;MQ=60.00;MQRankSum=0.000;QD=22.36;ReadPosRankSum=-3.901;SOR=5.134	GT:AD:DP:GQ:PL	0/1:9,12:21:99:477,0,342	4	4.61238	4.32981	0.548578	2.46896	2.59811	4.20006
d225005	Ib	CSN4	FBgn0027054	1	2R:7973069	0.419847	2R	7973069	T	C	TC	FALSE	131	1565.6	AC=1;AF=0.500;AN=2;BaseQRankSum=4.391;DP=131;ExcessHet=3.0103;FS=10.974;MLEAC=1;MLEAF=0.500;MQ=60.00;MQRankSum=0.000;QD=11.95;ReadPosRankSum=-0.741;SOR=1.183	GT:AD:DP:GQ:PL	0/1:76,55:131:99:1573,0,2067	4	2.71701	2.92813	0.927838	3.57475	3.3122	4.20006
d225005	Ib	Lpin	FBgn0263593	-1	2R:8142846	1	2R	8142846	C	T	GA	FALSE	108	3549.03	AC=2;AF=1.00;AN=2;DP=108;ExcessHet=3.0103;FS=0.000;MLEAC=2;MLEAF=1.00;MQ=60.00;QD=32.86;SOR=0.693	GT:AD:DP:GQ:PL	1/1:0,108:108:99:3563,322,0	4	4.39667	5.07773	0.241101	2.14187	1.82211	4.20006
d225005	Ib	kermit	FBgn0010504	-1	2R:8156297	1	2R	8156297	C	T	GA	FALSE	73	2428.03	AC=2;AF=1.00;AN=2;DP=73;ExcessHet=3.0103;FS=0.000;MLEAC=2;MLEAF=1.00;MQ=60.00;QD=33.26;SOR=0.898	GT:AD:DP:GQ:PL	1/1:0,73:73:99:2442,219,0	4	0.870174	0.7957	0.872313	0.705398	0.872813	4.20006
d225005	Ib	kermit	FBgn0010504	-1	2R:8156467	1	2R	8156467	G	A	CT	FALSE	71	2370.03	AC=2;AF=1.00;AN=2;DP=71;ExcessHet=3.0103;FS=0.000;MLEAC=2;MLEAF=1.00;MQ=60.00;QD=33.38;SOR=1.362	GT:AD:DP:GQ:PL	1/1:0,71:71:99:2384,213,0	4	0.870174	0.7957	0.872313	0.705398	0.872813	4.20006
d225005	Ib	pnut	FBgn0013726	1	2R:8239511	0.544118	2R	8239511	C	T	CT	FALSE	68	929.6	AC=1;AF=0.500;AN=2;BaseQRankSum=-1.820;DP=68;ExcessHet=3.0103;FS=4.834;MLEAC=1;MLEAF=0.500;MQ=60.00;MQRankSum=0.000;QD=13.67;ReadPosRankSum=1.946;SOR=1.237	GT:AD:DP:GQ:PL	0/1:31,37:68:99:937,0,1170	4	4.19271	4.26349	0.83449	1.16797	1.53389	4.20006
d225005	Ib	Non1	FBgn0028473	-1	2R:9397142	0.363636	2R	9397142	T	G	AC	FALSE	110	1089.6	AC=1;AF=0.500;AN=2;BaseQRankSum=3.936;DP=110;ExcessHet=3.0103;FS=4.937;MLEAC=1;MLEAF=0.500;MQ=60.00;MQRankSum=0.000;QD=9.91;ReadPosRankSum=0.870;SOR=0.542	GT:AD:DP:GQ:PL	0/1:70,40:110:99:1097,0,2046	4	6.03749	5.45285	0.305987	4.58576	4.44045	4.20006
d225005	Ib	Uba1	FBgn0023143	-1	2R:9691630	0.95	2R	9691630	G	A	CT	FALSE	20	598	AC=2;AF=1.00;AN=2;BaseQRankSum=-0.466;DP=20;ExcessHet=3.0103;FS=0.000;MLEAC=2;MLEAF=1.00;MQ=60.00;MQRankSum=0.000;QD=29.90;ReadPosRankSum=0.264;SOR=0.368	GT:AD:DP:GQ:PL	1/1:1,19:20:25:612,25,0	4	4.58023	4.88416	0.433921	3.14724	3.06775	4.20006
d225005	Ib	PCB	FBgn0027580	-1	2R:9850716	1	2R	9850716	T	A	AT	FALSE	54	1652.03	AC=2;AF=1.00;AN=2;DP=54;ExcessHet=3.0103;FS=0.000;MLEAC=2;MLEAF=1.00;MQ=60.00;QD=30.59;SOR=3.611	GT:AD:DP:GQ:PL	1/1:0,54:54:99:1666,161,0	4	2.95692	2.68262	0.927092	2.30749	1.93229	4.20006
d225005	Ib	PCB	FBgn0027580	-1	2R:9850937	1	2R	9850937	A	G	TC	FALSE	132	4912.03	AC=2;AF=1.00;AN=2;DP=132;ExcessHet=3.0103;FS=0.000;MLEAC=2;MLEAF=1.00;MQ=60.00;QD=32.34;SOR=0.755	GT:AD:DP:GQ:PL	1/1:0,132:132:99:4926,397,0	4	2.95692	2.68262	0.927092	2.30749	1.93229	4.20006
d225005	Ib	PCB	FBgn0027580	-1	2R:9851007	1	2R	9851007	C	A	GT	FALSE	74	2485.03	AC=2;AF=1.00;AN=2;DP=74;ExcessHet=3.0103;FS=0.000;MLEAC=2;MLEAF=1.00;MQ=60.00;QD=33.58;SOR=0.927	GT:AD:DP:GQ:PL	1/1:0,74:74:99:2499,222,0	4	2.95692	2.68262	0.927092	2.30749	1.93229	4.20006
d225005	Ib	Pka-R2	FBgn0022382	-1	2R:9993968	0.893617	2R	9993968	T	G	AC	FALSE	47	1351.6	AC=1;AF=0.500;AN=2;BaseQRankSum=1.187;DP=47;ExcessHet=3.0103;FS=2.446;MLEAC=1;MLEAF=0.500;MQ=60.00;MQRankSum=0.000;QD=28.76;ReadPosRankSum=-0.800;SOR=0.223	GT:AD:DP:GQ:PL	0/1:5,42:47:37:1359,0,37	4	4.61114	4.8641	0.950267	2.30218	2.12679	4.20006
d225005	Ib	RpS4	FBgn0011284	1	3L:13043905	0.111111	3L	13043905	T	C	TC	FALSE	43	44.6	AC=1;AF=0.500;AN=2;BaseQRankSum=2.797;DP=43;ExcessHet=3.0103;FS=0.000;MLEAC=1;MLEAF=0.500;MQ=60.00;MQRankSum=0.000;QD=1.65;ReadPosRankSum=0.797;SOR=0.241	GT:AD:DP:GQ:PL	0/1:24,3:27:52:52,0,759	4	11.7053	11.6919	0.574608	10.8292	10.6055	4.20006
d225005	Ib	RpS4	FBgn0011284	1	3L:13043908	0.526316	3L	13043908	C	A	CA	FALSE	39	461.6	AC=1;AF=0.500;AN=2;BaseQRankSum=-0.094;DP=39;ExcessHet=3.0103;FS=3.378;MLEAC=1;MLEAF=0.500;MQ=60.00;MQRankSum=0.000;QD=12.15;ReadPosRankSum=2.642;SOR=1.961	GT:AD:DP:GQ:PL	0/1:18,20:38:99:469,0,460	4	11.7053	11.6919	0.574608	10.8292	10.6055	4.20006
d225005	Ib	RpS4	FBgn0011284	1	3L:13043910	0.566667	3L	13043910	C	A	CA	FALSE	30	463.6	AC=1;AF=0.500;AN=2;BaseQRankSum=-0.258;DP=30;ExcessHet=3.0103;FS=0.000;MLEAC=1;MLEAF=0.500;MQ=60.00;MQRankSum=0.000;QD=15.45;ReadPosRankSum=3.214;SOR=0.976	GT:AD:DP:GQ:PL	0/1:13,17:30:99:471,0,456	4	11.7053	11.6919	0.574608	10.8292	10.6055	4.20006
d225005	Ib	hzg	FBgn0036556	-1	3L:15993336	0.538462	3L	15993336	C	T	GA	FALSE	156	3182.6	AC=1;AF=0.500;AN=2;BaseQRankSum=-4.018;DP=156;ExcessHet=3.0103;FS=22.822;MLEAC=1;MLEAF=0.500;MQ=60.00;MQRankSum=0.000;QD=20.40;ReadPosRankSum=-0.484;SOR=1.813	GT:AD:DP:GQ:PL	0/1:72,84:156:99:3190,0,2943	4	5.14397	4.93394	0.384067	2.83095	2.66627	4.20006
d225005	Ib	Baldspot	FBgn0260960	-1	3L:16650290	0.391304	3L	16650290	C	G	GC	FALSE	23	219.6	AC=1;AF=0.500;AN=2;BaseQRankSum=-2.613;DP=23;ExcessHet=3.0103;FS=2.143;MLEAC=1;MLEAF=0.500;MQ=60.00;MQRankSum=0.000;QD=9.55;ReadPosRankSum=-2.103;SOR=1.646	GT:AD:DP:GQ:PL	0/1:14,9:23:99:227,0,453	4	4.3162	3.68063	0.334733	2.29501	2.10449	4.20006
d225005	Ib	Gabat	FBgn0036927	-1	3L:19998290	0.29	3L	19998290	G	A	CT	FALSE	100	644.6	AC=1;AF=0.500;AN=2;BaseQRankSum=-0.173;DP=100;ExcessHet=3.0103;FS=19.970;MLEAC=1;MLEAF=0.500;MQ=60.00;MQRankSum=0.000;QD=6.45;ReadPosRankSum=0.533;SOR=2.967	GT:AD:DP:GQ:PL	0/1:71,29:100:99:652,0,2018	4	6.21259	5.58795	0.454844	0.909187	1.67108	4.20006
d225005	Ib	Arf1	FBgn0010348	-1	3L:22868906	0.104991	3L	22868906	G	A	CT	FALSE	581	1174.6	AC=1;AF=0.500;AN=2;BaseQRankSum=5.222;DP=581;ExcessHet=3.0103;FS=78.537;MLEAC=1;MLEAF=0.500;MQ=60.00;MQRankSum=0.000;QD=2.02;ReadPosRankSum=-12.721;SOR=8.254	GT:AD:DP:GQ:PL	0/1:520,61:581:99:1182,0,21953	4	8.6993	8.75041	0.424486	6.12925	5.79862	4.20006
d225005	Ib	miple1	FBgn0027111	1	3L:268336	0.205882	3L	268336	G	A	GA	FALSE	408	1503.6	AC=1;AF=0.500;AN=2;BaseQRankSum=-5.122;DP=408;ExcessHet=3.0103;FS=6.594;MLEAC=1;MLEAF=0.500;MQ=60.00;MQRankSum=0.000;QD=3.69;ReadPosRankSum=1.587;SOR=1.276	GT:AD:DP:GQ:PL	0/1:324,84:408:99:1511,0,10118	4	7.4131	6.72737	0.192646	0.350849	0.501846	4.20006
d225005	Ib	eIF1	FBgn0035423	1	3L:3224500	0.156463	3L	3224500	C	T	CT	FALSE	441	1025.6	AC=1;AF=0.500;AN=2;BaseQRankSum=-3.642;DP=441;ExcessHet=3.0103;FS=0.799;MLEAC=1;MLEAF=0.500;MQ=60.00;MQRankSum=0.000;QD=2.33;ReadPosRankSum=0.233;SOR=0.585	GT:AD:DP:GQ:PL	0/1:372,69:441:99:1033,0,11789	4	9.0067	8.95376	0.566046	7.58748	7.48339	4.20006
d225005	Ib	nmo	FBgn0011817	1	3L:8050127	0.154206	3L	8050127	C	T	CT	FALSE	428	802.6	AC=1;AF=0.500;AN=2;BaseQRankSum=-4.788;DP=428;ExcessHet=3.0103;FS=4.878;MLEAC=1;MLEAF=0.500;MQ=60.00;MQRankSum=0.000;QD=1.88;ReadPosRankSum=-0.429;SOR=1.176	GT:AD:DP:GQ:PL	0/1:362,66:428:99:810,0,12116	4	7.29762	7.24582	0.82652	1.63176	1.32021	4.20006
d225005	Ib	Hsp23	FBgn0001224	1	3L:9381885	1	3L	9381885	C	G	CG	FALSE	15	530.03	AC=2;AF=1.00;AN=2;DP=15;ExcessHet=3.0103;FS=0.000;MLEAC=2;MLEAF=1.00;MQ=60.00;QD=29.87;SOR=4.047	GT:AD:DP:GQ:PL	1/1:0,15:15:45:544,45,0	4	11.3927	13.4989	1.5571e-13	6.47518	5.86934	4.20006
d225005	Ib	Hsp23	FBgn0001224	1	3L:9382763	0.280702	3L	9382763	T	A	TA	FALSE	117	551.6	AC=1;AF=0.500;AN=2;BaseQRankSum=1.817;DP=117;ExcessHet=3.0103;FS=4.955;MLEAC=1;MLEAF=0.500;MQ=60.00;MQRankSum=0.000;QD=4.84;ReadPosRankSum=-1.925;SOR=2.007	GT:AD:DP:GQ:PL	0/1:82,32:114:99:559,0,2592	4	11.3927	13.4989	1.5571e-13	6.47518	5.86934	4.20006
d225005	Ib	Hsp23	FBgn0001224	1	3L:9382765	0.357143	3L	9382765	T	A	TA	FALSE	71	446.6	AC=1;AF=0.500;AN=2;BaseQRankSum=2.821;DP=71;ExcessHet=3.0103;FS=2.723;MLEAC=1;MLEAF=0.500;MQ=60.00;MQRankSum=0.000;QD=6.38;ReadPosRankSum=-0.928;SOR=1.421	GT:AD:DP:GQ:PL	0/1:45,25:70:99:454,0,2601	4	11.3927	13.4989	1.5571e-13	6.47518	5.86934	4.20006
d225005	Ib	Hsp27	FBgn0001226	1	3L:9384781	0.115028	3L	9384781	G	A	GA	FALSE	539	588.6	AC=1;AF=0.500;AN=2;BaseQRankSum=-4.058;DP=539;ExcessHet=3.0103;FS=6.073;MLEAC=1;MLEAF=0.500;MQ=60.00;MQRankSum=0.000;QD=1.09;ReadPosRankSum=-0.925;SOR=0.291	GT:AD:DP:GQ:PL	0/1:477,62:539:99:596,0,16001	4	8.33539	9.03336	0.114657	4.81649	4.10816	4.20006
d225005	Ib	hth	FBgn0001235	-1	3R:10613632	1	3R	10613632	C	T	GA	FALSE	17	555.03	AC=2;AF=1.00;AN=2;DP=17;ExcessHet=3.0103;FS=0.000;MLEAC=2;MLEAF=1.00;MQ=60.00;QD=32.65;SOR=1.739	GT:AD:DP:GQ:PL	1/1:0,17:17:51:569,51,0	4	4.98397	5.64813	0.197441	4.70896	4.59923	4.20006
d225005	Ib	Jupiter	FBgn0051363	-1	3R:11591098	0.315789	3R	11591098	C	T	GA	FALSE	48	130.6	AC=1;AF=0.500;AN=2;BaseQRankSum=2.471;DP=48;ExcessHet=3.0103;FS=7.497;MLEAC=1;MLEAF=0.500;MQ=60.00;MQRankSum=0.000;QD=3.44;ReadPosRankSum=-1.345;SOR=1.981	GT:AD:DP:GQ:PL	0/1:26,12:38:99:138,0,882	4	6.79362	8.10302	0.00074263	3.04982	3.26631	4.20006
d225005	Ib	eff	FBgn0011217	-1	3R:14740656	0.265	3R	14740656	G	A	CT	FALSE	201	1311.6	AC=1;AF=0.500;AN=2;BaseQRankSum=-5.294;DP=201;ExcessHet=3.0103;FS=4.054;MLEAC=1;MLEAF=0.500;MQ=60.00;MQRankSum=0.000;QD=6.56;ReadPosRankSum=1.729;SOR=0.421	GT:AD:DP:GQ:PL	0/1:147,53:200:99:1319,0,4523	4	8.29029	7.85875	0.388493	5.75012	5.37081	4.20006
d225005	Ib	Fas1	FBgn0285925	1	3R:16631728	0.318584	3R	16631728	G	A	GA	FALSE	121	76.6	AC=1;AF=0.500;AN=2;BaseQRankSum=7.601;DP=121;ExcessHet=3.0103;FS=30.496;MLEAC=1;MLEAF=0.500;MQ=60.00;MQRankSum=0.000;QD=0.68;ReadPosRankSum=-8.438;SOR=3.630	GT:AD:DP:GQ:PL	0/1:77,36:113:84:84,0,2683	4	6.18665	6.29914	0.632161	0.987396	1.30282	4.20006
d225005	Ib	CG14321	FBgn0038540	1	3R:17734055	0.146138	3R	17734055	C	T	CT	FALSE	479	939.6	AC=1;AF=0.500;AN=2;BaseQRankSum=-2.135;DP=479;ExcessHet=3.0103;FS=3.775;MLEAC=1;MLEAF=0.500;MQ=60.00;MQRankSum=0.000;QD=1.96;ReadPosRankSum=2.800;SOR=0.417	GT:AD:DP:GQ:PL	0/1:409,70:479:99:947,0,13046	4	7.41511	7.18802	0.96484	0.2092	0.228958	4.20006
d225005	Ib	14-3-3epsilon	FBgn0020238	1	3R:18248587	0.315615	3R	18248587	G	A	GA	FALSE	331	1034.07	AC=1;AF=0.500;AN=2;BaseQRankSum=1.950;DP=331;ExcessHet=3.0103;FS=3.102;MLEAC=1;MLEAF=0.500;MQ=60.00;MQRankSum=0.000;QD=3.44;ReadPosRankSum=0.289;SOR=0.652	GT:AD:DP:GQ:PL	0/1:206,95:301:99:1387,0,4236	4	11.177	11.3074	0.551178	7.54804	7.48365	4.20006
d225005	Ib	Xrp1	FBgn0261113	1	3R:18918473	0.213592	3R	18918473	T	G	TG	FALSE	103	441.6	AC=1;AF=0.500;AN=2;BaseQRankSum=3.436;DP=103;ExcessHet=3.0103;FS=3.513;MLEAC=1;MLEAF=0.500;MQ=60.00;MQRankSum=0.000;QD=4.29;ReadPosRankSum=-0.550;SOR=0.342	GT:AD:DP:GQ:PL	0/1:81,22:103:99:449,0,2376	4	6.93525	6.63308	0.99582	5.49922	5.49918	4.20006
d225005	Ib	CG42613	FBgn0261262	1	3R:18931199	0.561404	3R	18931199	A	C	AC	FALSE	285	4928.6	AC=1;AF=0.500;AN=2;BaseQRankSum=6.900;DP=285;ExcessHet=3.0103;FS=13.503;MLEAC=1;MLEAF=0.500;MQ=60.00;MQRankSum=0.000;QD=17.29;ReadPosRankSum=-2.795;SOR=0.299	GT:AD:DP:GQ:PL	0/1:125,160:285:99:4936,0,3180	4	3.85208	4.55131	0.161142	0.0438153	0.0533868	4.20006
d225005	Ib	CG42613	FBgn0261262	1	3R:18977988	0.225806	3R	18977988	A	T	AT	FALSE	62	298.6	AC=1;AF=0.500;AN=2;BaseQRankSum=0.538;DP=62;ExcessHet=3.0103;FS=27.019;MLEAC=1;MLEAF=0.500;MQ=60.00;MQRankSum=0.000;QD=4.82;ReadPosRankSum=-4.522;SOR=2.952	GT:AD:DP:GQ:PL	0/1:48,14:62:99:306,0,1523	4	3.85208	4.55131	0.161142	0.0438153	0.0533868	4.20006
d225005	Ib	Nsun5	FBgn0259704	-1	3R:19162194	0.711111	3R	19162194	C	T	GA	FALSE	90	1638.6	AC=1;AF=0.500;AN=2;BaseQRankSum=-0.092;DP=90;ExcessHet=3.0103;FS=1.406;MLEAC=1;MLEAF=0.500;MQ=60.00;MQRankSum=0.000;QD=18.21;ReadPosRankSum=0.343;SOR=1.248	GT:AD:DP:GQ:PL	0/1:26,64:90:99:1646,0,548	4	1.44057	0.932231	0.274227	1.03784	1.2067	4.20006
d225005	Ib	vib	FBgn0267975	-1	3R:19217980	0.510949	3R	19217980	A	G	TC	FALSE	137	1869.6	AC=1;AF=0.500;AN=2;BaseQRankSum=0.889;DP=137;ExcessHet=3.0103;FS=1.719;MLEAC=1;MLEAF=0.500;MQ=60.00;MQRankSum=0.000;QD=13.65;ReadPosRankSum=1.340;SOR=0.942	GT:AD:DP:GQ:PL	0/1:67,70:137:99:1877,0,1720	4	5.02601	5.14846	0.946513	3.41525	3.2449	4.20006
d225005	Ib	unc79	FBgn0038693	-1	3R:19231784	0.233333	3R	19231784	G	A	CT	FALSE	30	217.6	AC=1;AF=0.500;AN=2;BaseQRankSum=-1.533;DP=30;ExcessHet=3.0103;FS=4.054;MLEAC=1;MLEAF=0.500;MQ=60.00;MQRankSum=0.000;QD=7.25;ReadPosRankSum=-0.330;SOR=1.584	GT:AD:DP:GQ:PL	0/1:23,7:30:99:225,0,945	4	2.90697	2.80846	0.812982	0.0661757	0.0380713	4.20006
d225005	Ib	unc79	FBgn0038693	-1	3R:19245264	1	3R	19245264	G	A	CT	FALSE	83	3628.03	AC=2;AF=1.00;AN=2;DP=83;ExcessHet=3.0103;FS=0.000;MLEAC=2;MLEAF=1.00;MQ=60.00;QD=28.58;SOR=0.872	GT:AD:DP:GQ:PL	1/1:0,83:83:99:3642,249,0	4	2.90697	2.80846	0.812982	0.0661757	0.0380713	4.20006
d225005	Ib	Cow	FBgn0039054	-1	3R:23075169	0.693333	3R	23075169	C	T	GA	FALSE	75	2088.6	AC=1;AF=0.500;AN=2;BaseQRankSum=-1.896;DP=75;ExcessHet=3.0103;FS=0.947;MLEAC=1;MLEAF=0.500;MQ=60.00;MQRankSum=0.000;QD=27.85;ReadPosRankSum=1.565;SOR=0.540	GT:AD:DP:GQ:PL	0/1:23,52:75:99:2096,0,798	4	6.07048	6.14794	0.757327	0.0371922	0.0664222	4.20006
d225005	Ib	Cow	FBgn0039054	-1	3R:23075200	0.662651	3R	23075200	T	A	AT	FALSE	83	1594.6	AC=1;AF=0.500;AN=2;BaseQRankSum=1.115;DP=83;ExcessHet=3.0103;FS=1.920;MLEAC=1;MLEAF=0.500;MQ=60.00;MQRankSum=0.000;QD=19.21;ReadPosRankSum=-0.372;SOR=0.505	GT:AD:DP:GQ:PL	0/1:28,55:83:99:1602,0,638	4	6.07048	6.14794	0.757327	0.0371922	0.0664222	4.20006
d225005	Ib	Cow	FBgn0039054	-1	3R:23075298	0.820896	3R	23075298	C	T	GA	FALSE	67	1424.6	AC=1;AF=0.500;AN=2;BaseQRankSum=-3.306;DP=67;ExcessHet=3.0103;FS=2.880;MLEAC=1;MLEAF=0.500;MQ=60.00;MQRankSum=0.000;QD=21.26;ReadPosRankSum=-2.245;SOR=1.371	GT:AD:DP:GQ:PL	0/1:12,55:67:99:1432,0,223	4	6.07048	6.14794	0.757327	0.0371922	0.0664222	4.20006
d225005	Ib	cnc	FBgn0262975	-1	3R:23186349	1	3R	23186349	C	T	GA	FALSE	40	1650.03	AC=2;AF=1.00;AN=2;DP=40;ExcessHet=3.0103;FS=0.000;MLEAC=2;MLEAF=1.00;MQ=60.00;QD=30.76;SOR=1.151	GT:AD:DP:GQ:PL	1/1:0,40:40:99:1664,123,0	4	3.82387	4.59475	0.0116133	4.09835	3.88656	4.20006
d225005	Ib	cnc	FBgn0262975	-1	3R:23186482	0.418605	3R	23186482	T	G	AC	FALSE	129	1611.6	AC=1;AF=0.500;AN=2;BaseQRankSum=8.005;DP=129;ExcessHet=3.0103;FS=1.345;MLEAC=1;MLEAF=0.500;MQ=60.00;MQRankSum=0.000;QD=12.49;ReadPosRankSum=1.063;SOR=0.990	GT:AD:DP:GQ:PL	0/1:75,54:129:99:1619,0,2092	4	3.82387	4.59475	0.0116133	4.09835	3.88656	4.20006
d225005	Ib	ATPsynCF6	FBgn0016119	-1	3R:23355666	0.849462	3R	23355666	C	T	GA	FALSE	373	9645.6	AC=1;AF=0.500;AN=2;BaseQRankSum=-7.109;DP=373;ExcessHet=3.0103;FS=8.335;MLEAC=1;MLEAF=0.500;MQ=60.00;MQRankSum=0.000;QD=25.93;ReadPosRankSum=-0.034;SOR=0.394	GT:AD:DP:GQ:PL	0/1:56,316:372:99:9653,0,854	4	9.01907	8.99728	0.563116	8.34196	8.52202	4.20006
d225005	Ib	ATPsynCF6	FBgn0016119	-1	3R:23356022	1	3R	23356022	T	G	AC	FALSE	155	5897.03	AC=2;AF=1.00;AN=2;DP=155;ExcessHet=3.0103;FS=0.000;MLEAC=2;MLEAF=1.00;MQ=60.00;QD=30.27;SOR=6.132	GT:AD:DP:GQ:PL	1/1:0,155:155:99:5911,466,0	4	9.01907	8.99728	0.563116	8.34196	8.52202	4.20006
d225005	Ib	RpS3	FBgn0002622	1	3R:23359255	0.364948	3R	23359255	T	C	TC	FALSE	1942	18565.6	AC=1;AF=0.500;AN=2;BaseQRankSum=5.365;DP=1942;ExcessHet=3.0103;FS=0.000;MLEAC=1;MLEAF=0.500;MQ=60.00;MQRankSum=0.000;QD=9.57;ReadPosRankSum=-1.060;SOR=0.700	GT:AD:DP:GQ:PL	0/1:1232,708:1940:99:18573,0,36244	4	11.3972	11.4997	0.982615	10.5923	10.366	4.20006
d225005	Ib	RpS3	FBgn0002622	1	3R:23359988	0.485714	3R	23359988	G	T	GT	FALSE	140	1869.6	AC=1;AF=0.500;AN=2;BaseQRankSum=-5.771;DP=140;ExcessHet=3.0103;FS=0.000;MLEAC=1;MLEAF=0.500;MQ=60.00;MQRankSum=0.000;QD=13.35;ReadPosRankSum=1.355;SOR=0.705	GT:AD:DP:GQ:PL	0/1:72,68:140:99:1877,0,2221	4	11.3972	11.4997	0.982615	10.5923	10.366	4.20006
d225005	Ib	RpS3	FBgn0002622	1	3R:23360049	0.439252	3R	23360049	C	T	CT	FALSE	107	1296.6	AC=1;AF=0.500;AN=2;BaseQRankSum=-2.764;DP=107;ExcessHet=3.0103;FS=11.657;MLEAC=1;MLEAF=0.500;MQ=60.00;MQRankSum=0.000;QD=12.12;ReadPosRankSum=1.467;SOR=0.194	GT:AD:DP:GQ:PL	0/1:60,47:107:99:1304,0,2389	4	11.3972	11.4997	0.982615	10.5923	10.366	4.20006
d225005	Ib	RpS3	FBgn0002622	1	3R:23360107	0.422535	3R	23360107	C	A	CA	FALSE	71	800.6	AC=1;AF=0.500;AN=2;BaseQRankSum=-4.069;DP=71;ExcessHet=3.0103;FS=24.269;MLEAC=1;MLEAF=0.500;MQ=60.00;MQRankSum=0.000;QD=11.28;ReadPosRankSum=1.563;SOR=3.273	GT:AD:DP:GQ:PL	0/1:41,30:71:99:808,0,1596	4	11.3972	11.4997	0.982615	10.5923	10.366	4.20006
d225005	Ib	Rpt5	FBgn0028684	1	3R:23754154	0.590909	3R	23754154	G	A	GA	FALSE	88	1475.6	AC=1;AF=0.500;AN=2;BaseQRankSum=-3.839;DP=88;ExcessHet=3.0103;FS=43.733;MLEAC=1;MLEAF=0.500;MQ=60.00;MQRankSum=0.000;QD=16.77;ReadPosRankSum=-0.391;SOR=3.518	GT:AD:DP:GQ:PL	0/1:36,52:88:99:1483,0,1042	4	5.93216	6.10852	0.925004	5.71526	5.18509	4.20006
d225005	Ib	CG13601	FBgn0039126	-1	3R:23926674	1	3R	23926674	G	A	CT	FALSE	45	1570.03	AC=2;AF=1.00;AN=2;DP=45;ExcessHet=3.0103;FS=0.000;MLEAC=2;MLEAF=1.00;MQ=60.00;QD=34.89;SOR=0.737	GT:AD:DP:GQ:PL	1/1:0,45:45:99:1584,135,0	4	1.74374	2.14621	0.648932	1.74247	1.56615	4.20006
d225005	Ib	Gdh	FBgn0001098	-1	3R:23936168	0.367742	3R	23936168	C	G	GC	FALSE	155	1660.6	AC=1;AF=0.500;AN=2;BaseQRankSum=-3.111;DP=155;ExcessHet=3.0103;FS=2.212;MLEAC=1;MLEAF=0.500;MQ=60.00;MQRankSum=0.000;QD=10.71;ReadPosRankSum=-0.071;SOR=0.928	GT:AD:DP:GQ:PL	0/1:98,57:155:99:1668,0,3099	4	6.73636	5.26871	0.00814535	4.37474	4.57326	4.20006
d225005	Ib	Gdh	FBgn0001098	-1	3R:23942634	0.897959	3R	23942634	G	A	CT	FALSE	49	1350.64	AC=1;AF=0.500;AN=2;BaseQRankSum=0.955;DP=49;ExcessHet=3.0103;FS=0.000;MLEAC=1;MLEAF=0.500;MQ=60.00;MQRankSum=0.000;QD=27.56;ReadPosRankSum=0.616;SOR=0.859	GT:AD:DP:GQ:PL	0/1:5,44:49:10:1358,0,10	4	6.73636	5.26871	0.00814535	4.37474	4.57326	4.20006
d225005	Ib	CG31140	FBgn0051140	1	3R:23981933	0.614173	3R	23981933	C	T	CT	FALSE	127	2196.6	AC=1;AF=0.500;AN=2;BaseQRankSum=-6.471;DP=127;ExcessHet=3.0103;FS=8.871;MLEAC=1;MLEAF=0.500;MQ=60.00;MQRankSum=0.000;QD=17.30;ReadPosRankSum=0.971;SOR=2.078	GT:AD:DP:GQ:PL	0/1:49,78:127:99:2204,0,1390	4	5.33289	5.77175	0.887479	1.38007	1.01442	4.20006
d225005	Ib	CG5902	FBgn0039136	1	3R:23987955	1	3R	23987955	G	A	GA	FALSE	110	3174.03	AC=2;AF=1.00;AN=2;DP=110;ExcessHet=3.0103;FS=0.000;MLEAC=2;MLEAF=1.00;MQ=60.00;QD=28.85;SOR=0.767	GT:AD:DP:GQ:PL	1/1:0,110:110:99:3188,325,0	4	4.46095	6.00348	0.0326598	4.02602	3.81232	4.20006
d225005	Ib	Rab7	FBgn0015795	1	3R:23993999	0.446512	3R	23993999	G	A	GA	FALSE	216	2485.6	AC=1;AF=0.500;AN=2;BaseQRankSum=-7.111;DP=216;ExcessHet=3.0103;FS=6.602;MLEAC=1;MLEAF=0.500;MQ=60.00;MQRankSum=0.000;QD=11.56;ReadPosRankSum=0.163;SOR=0.733	GT:AD:DP:GQ:PL	0/1:119,96:215:99:2493,0,3539	4	5.39259	6.11489	0.505856	5.76257	5.43417	4.20006
d225005	Ib	Rab7	FBgn0015795	1	3R:23995450	0.5	3R	23995450	T	C	TC	FALSE	33	401.6	AC=1;AF=0.500;AN=2;BaseQRankSum=1.769;DP=33;ExcessHet=3.0103;FS=1.643;MLEAC=1;MLEAF=0.500;MQ=60.00;MQRankSum=0.000;QD=12.55;ReadPosRankSum=0.916;SOR=1.402	GT:AD:DP:GQ:PL	0/1:16,16:32:99:409,0,350	4	5.39259	6.11489	0.505856	5.76257	5.43417	4.20006
d225005	Ib	CG18428	FBgn0039149	1	3R:24109984	1	3R	24109984	G	T	GT	FALSE	86	2513.03	AC=2;AF=1.00;AN=2;DP=86;ExcessHet=3.0103;FS=0.000;MLEAC=2;MLEAF=1.00;MQ=60.00;QD=29.22;SOR=4.357	GT:AD:DP:GQ:PL	1/1:0,86:86:99:2527,257,0	4	4.48188	4.23664	0.944416	2.04254	1.85564	4.20006
d225005	Ib	Myo95E	FBgn0039157	-1	3R:24155079	1	3R	24155079	C	T	GA	FALSE	31	1043.03	AC=2;AF=1.00;AN=2;DP=31;ExcessHet=3.0103;FS=0.000;MLEAC=2;MLEAF=1.00;MQ=60.00;QD=33.65;SOR=0.756	GT:AD:DP:GQ:PL	1/1:0,31:31:93:1057,93,0	4	0.806739	0.875025	0.83355	0.199843	0.252291	4.20006
d225005	Ib	Pp1alpha-96A	FBgn0003134	1	3R:24518592	0.214286	3R	24518592	G	A	GA	FALSE	14	33.6	AC=1;AF=0.500;AN=2;BaseQRankSum=-2.157;DP=14;ExcessHet=3.0103;FS=7.549;MLEAC=1;MLEAF=0.500;MQ=60.00;MQRankSum=0.000;QD=2.40;ReadPosRankSum=0.079;SOR=0.850	GT:AD:DP:GQ:PL	0/1:11,3:14:41:41,0,344	4	5.38964	4.74157	0.365863	2.2853	1.98205	4.20006
d225005	Ib	Ald1	FBgn0000064	-1	3R:26254088	0.460674	3R	26254088	G	C	CG	FALSE	89	1599.6	AC=1;AF=0.500;AN=2;BaseQRankSum=3.056;DP=89;ExcessHet=3.0103;FS=3.366;MLEAC=1;MLEAF=0.500;MQ=60.00;MQRankSum=0.000;QD=17.97;ReadPosRankSum=1.363;SOR=0.161	GT:AD:DP:GQ:PL	0/1:48,41:89:99:1607,0,1943	4	11.4026	10.0568	0.0414265	10.8637	11.1339	4.20006
d225005	Ib	Ald1	FBgn0000064	-1	3R:26254107	0.406061	3R	26254107	T	G	AC	FALSE	165	2256.6	AC=1;AF=0.500;AN=2;BaseQRankSum=5.302;DP=165;ExcessHet=3.0103;FS=4.482;MLEAC=1;MLEAF=0.500;MQ=60.00;MQRankSum=0.000;QD=13.68;ReadPosRankSum=1.410;SOR=0.277	GT:AD:DP:GQ:PL	0/1:98,67:165:99:2264,0,3349	4	11.4026	10.0568	0.0414265	10.8637	11.1339	4.20006
d225005	Ib	Ald1	FBgn0000064	-1	3R:26254310	0.362729	3R	26254310	T	A	AT	FALSE	601	5844.6	AC=1;AF=0.500;AN=2;BaseQRankSum=4.501;DP=601;ExcessHet=3.0103;FS=1.265;MLEAC=1;MLEAF=0.500;MQ=60.00;MQRankSum=0.000;QD=9.72;ReadPosRankSum=0.601;SOR=0.824	GT:AD:DP:GQ:PL	0/1:383,218:601:99:5852,0,11376	4	11.4026	10.0568	0.0414265	10.8637	11.1339	4.20006
d225005	Ib	Ald1	FBgn0000064	-1	3R:26254347	0.400359	3R	26254347	G	C	CG	FALSE	557	6791.6	AC=1;AF=0.500;AN=2;BaseQRankSum=1.373;DP=557;ExcessHet=3.0103;FS=1.771;MLEAC=1;MLEAF=0.500;MQ=60.00;MQRankSum=0.000;QD=12.19;ReadPosRankSum=-1.079;SOR=0.816	GT:AD:DP:GQ:PL	0/1:334,223:557:99:6799,0,10784	4	11.4026	10.0568	0.0414265	10.8637	11.1339	4.20006
d225005	Ib	Ald1	FBgn0000064	-1	3R:26254449	0.411594	3R	26254449	G	T	CA	FALSE	690	7540.6	AC=1;AF=0.500;AN=2;BaseQRankSum=-11.520;DP=690;ExcessHet=3.0103;FS=2.488;MLEAC=1;MLEAF=0.500;MQ=60.00;MQRankSum=0.000;QD=10.93;ReadPosRankSum=-2.274;SOR=0.876	GT:AD:DP:GQ:PL	0/1:406,284:690:99:7548,0,12740	4	11.4026	10.0568	0.0414265	10.8637	11.1339	4.20006
d225005	Ib	Ald1	FBgn0000064	-1	3R:26254539	0.346856	3R	26254539	G	A	CT	FALSE	493	6219.6	AC=1;AF=0.500;AN=2;BaseQRankSum=-3.102;DP=493;ExcessHet=3.0103;FS=3.436;MLEAC=1;MLEAF=0.500;MQ=60.00;MQRankSum=0.000;QD=12.62;ReadPosRankSum=-0.628;SOR=0.585	GT:AD:DP:GQ:PL	0/1:322,171:493:99:6227,0,12466	4	11.4026	10.0568	0.0414265	10.8637	11.1339	4.20006
d225005	Ib	Ald1	FBgn0000064	-1	3R:26254561	0.388393	3R	26254561	T	A	AT	FALSE	448	5657.6	AC=1;AF=0.500;AN=2;BaseQRankSum=5.903;DP=448;ExcessHet=3.0103;FS=1.838;MLEAC=1;MLEAF=0.500;MQ=60.00;MQRankSum=0.000;QD=12.63;ReadPosRankSum=1.338;SOR=0.841	GT:AD:DP:GQ:PL	0/1:274,174:448:99:5665,0,10384	4	11.4026	10.0568	0.0414265	10.8637	11.1339	4.20006
d225005	Ib	Ald1	FBgn0000064	-1	3R:26255222	0.4	3R	26255222	T	A	AT	FALSE	587	5734.6	AC=1;AF=0.500;AN=2;BaseQRankSum=-8.956;DP=587;ExcessHet=3.0103;FS=23.439;MLEAC=1;MLEAF=0.500;MQ=60.00;MQRankSum=0.000;QD=9.80;ReadPosRankSum=-4.001;SOR=1.915	GT:AD:DP:GQ:PL	0/1:351,234:585:99:5742,0,10226	4	11.4026	10.0568	0.0414265	10.8637	11.1339	4.20006
d225005	Ib	Ald1	FBgn0000064	-1	3R:26255318	0.456835	3R	26255318	G	T	CA	FALSE	834	10221.6	AC=1;AF=0.500;AN=2;BaseQRankSum=-12.608;DP=834;ExcessHet=3.0103;FS=4.979;MLEAC=1;MLEAF=0.500;MQ=60.00;MQRankSum=0.000;QD=12.26;ReadPosRankSum=4.693;SOR=0.776	GT:AD:DP:GQ:PL	0/1:453,381:834:99:10229,0,13878	4	11.4026	10.0568	0.0414265	10.8637	11.1339	4.20006
d225005	Ib	Ald1	FBgn0000064	-1	3R:26257733	0.513089	3R	26257733	C	T	GA	FALSE	1530	21751.6	AC=1;AF=0.500;AN=2;BaseQRankSum=-13.705;DP=1530;ExcessHet=3.0103;FS=0.521;MLEAC=1;MLEAF=0.500;MQ=60.00;MQRankSum=0.000;QD=14.24;ReadPosRankSum=0.778;SOR=0.764	GT:AD:DP:GQ:PL	0/1:744,784:1528:99:21759,0,21691	4	11.4026	10.0568	0.0414265	10.8637	11.1339	4.20006
d225005	Ib	Yif1	FBgn0288631	1	3R:26719531	1	3R	26719531	C	T	CT	FALSE	89	2863.03	AC=2;AF=1.00;AN=2;DP=89;ExcessHet=3.0103;FS=0.000;MLEAC=2;MLEAF=1.00;MQ=60.00;QD=32.17;SOR=1.890	GT:AD:DP:GQ:PL	1/1:0,89:89:99:2877,266,0	4						4.20006
d225005	Ib	Yif1	FBgn0288631	1	3R:26719582	1	3R	26719582	G	A	GA	FALSE	79	3454.03	AC=2;AF=1.00;AN=2;DP=79;ExcessHet=3.0103;FS=0.000;MLEAC=2;MLEAF=1.00;MQ=60.00;QD=28.81;SOR=1.893	GT:AD:DP:GQ:PL	1/1:0,79:79:99:3468,241,0	4						4.20006
d225005	Ib	Yif1	FBgn0288631	1	3R:26719591	1	3R	26719591	G	A	GA	FALSE	79	3412.03	AC=2;AF=1.00;AN=2;DP=79;ExcessHet=3.0103;FS=0.000;MLEAC=2;MLEAF=1.00;MQ=60.00;QD=29.81;SOR=1.795	GT:AD:DP:GQ:PL	1/1:0,79:79:99:3426,238,0	4						4.20006
d225005	Ib	VhaAC45RP	FBgn0051030	-1	3R:30165428	0.237288	3R	30165428	C	T	GA	FALSE	355	1551.6	AC=1;AF=0.500;AN=2;BaseQRankSum=-3.203;DP=355;ExcessHet=3.0103;FS=3.603;MLEAC=1;MLEAF=0.500;MQ=60.00;MQRankSum=0.000;QD=4.38;ReadPosRankSum=-0.431;SOR=0.490	GT:AD:DP:GQ:PL	0/1:270,84:354:99:1559,0,8154	4	6.3392	6.42463	0.721484	0.410326	0.49666	4.20006
d225005	Ib	tmod	FBgn0082582	1	3R:30577483	1	3R	30577483	T	C	TC	FALSE	38	1675.03	AC=2;AF=1.00;AN=2;DP=38;ExcessHet=3.0103;FS=0.000;MLEAC=2;MLEAF=1.00;MQ=60.00;QD=25.28;SOR=5.031	GT:AD:DP:GQ:PL	1/1:0,38:38:99:1689,114,0	4	5.81165	6.22782	0.293856	5.59956	5.11275	4.20006
d225005	Ib	dj-1beta	FBgn0039802	1	3R:30807188	0.278481	3R	30807188	G	A	GA	FALSE	79	421.6	AC=1;AF=0.500;AN=2;BaseQRankSum=-0.075;DP=79;ExcessHet=3.0103;FS=3.554;MLEAC=1;MLEAF=0.500;MQ=60.00;MQRankSum=0.000;QD=5.34;ReadPosRankSum=-0.412;SOR=0.366	GT:AD:DP:GQ:PL	0/1:57,22:79:99:429,0,1689	4	6.22213	6.28987	0.941462	5.54297	5.84859	4.20006
d225005	Ib	dj-1beta	FBgn0039802	1	3R:30807480	0.282958	3R	30807480	C	T	CT	FALSE	311	1800.6	AC=1;AF=0.500;AN=2;BaseQRankSum=-6.428;DP=311;ExcessHet=3.0103;FS=1.514;MLEAC=1;MLEAF=0.500;MQ=60.00;MQRankSum=0.000;QD=5.79;ReadPosRankSum=-0.458;SOR=0.665	GT:AD:DP:GQ:PL	0/1:223,88:311:99:1808,0,6990	4	6.22213	6.28987	0.941462	5.54297	5.84859	4.20006
d225005	Ib	dj-1beta	FBgn0039802	1	3R:30807875	0.244444	3R	30807875	T	G	TG	FALSE	180	1012.6	AC=1;AF=0.500;AN=2;BaseQRankSum=5.849;DP=180;ExcessHet=3.0103;FS=0.000;MLEAC=1;MLEAF=0.500;MQ=60.00;MQRankSum=0.000;QD=5.63;ReadPosRankSum=-1.851;SOR=0.693	GT:AD:DP:GQ:PL	0/1:136,44:180:99:1020,0,3936	4	6.22213	6.28987	0.941462	5.54297	5.84859	4.20006
d225005	Ib	dj-1beta	FBgn0039802	1	3R:30807920	0.310345	3R	30807920	T	C	TC	FALSE	145	1158.6	AC=1;AF=0.500;AN=2;BaseQRankSum=6.372;DP=145;ExcessHet=3.0103;FS=4.073;MLEAC=1;MLEAF=0.500;MQ=60.00;MQRankSum=0.000;QD=7.99;ReadPosRankSum=0.733;SOR=1.367	GT:AD:DP:GQ:PL	0/1:100,45:145:99:1166,0,2729	4	6.22213	6.28987	0.941462	5.54297	5.84859	4.20006
d225005	Ib	cindr	FBgn0027598	1	3R:30808701	0.326087	3R	30808701	C	A	CA	FALSE	46	356.6	AC=1;AF=0.500;AN=2;BaseQRankSum=-2.365;DP=46;ExcessHet=3.0103;FS=0.000;MLEAC=1;MLEAF=0.500;MQ=60.00;MQRankSum=0.000;QD=7.75;ReadPosRankSum=-0.744;SOR=0.593	GT:AD:DP:GQ:PL	0/1:31,15:46:99:364,0,918	4	3.79459	4.09584	0.742166	2.21586	2.35913	4.20006
d225005	Ib	cindr	FBgn0027598	1	3R:30808716	0.317073	3R	30808716	A	T	AT	FALSE	41	314.6	AC=1;AF=0.500;AN=2;BaseQRankSum=1.754;DP=41;ExcessHet=3.0103;FS=1.345;MLEAC=1;MLEAF=0.500;MQ=60.00;MQRankSum=0.000;QD=7.67;ReadPosRankSum=-0.057;SOR=0.446	GT:AD:DP:GQ:PL	0/1:28,13:41:99:322,0,803	4	3.79459	4.09584	0.742166	2.21586	2.35913	4.20006
d225005	Ib	cindr	FBgn0027598	1	3R:30808815	0.319444	3R	30808815	C	G	CG	FALSE	72	541.6	AC=1;AF=0.500;AN=2;BaseQRankSum=-1.227;DP=72;ExcessHet=3.0103;FS=0.000;MLEAC=1;MLEAF=0.500;MQ=60.00;MQRankSum=0.000;QD=7.52;ReadPosRankSum=-1.831;SOR=0.735	GT:AD:DP:GQ:PL	0/1:49,23:72:99:549,0,1554	4	3.79459	4.09584	0.742166	2.21586	2.35913	4.20006
d225005	Ib	cindr	FBgn0027598	1	3R:30808849	0.351852	3R	30808849	C	A	CA	FALSE	54	468.6	AC=1;AF=0.500;AN=2;BaseQRankSum=-4.464;DP=54;ExcessHet=3.0103;FS=0.000;MLEAC=1;MLEAF=0.500;MQ=60.00;MQRankSum=0.000;QD=8.68;ReadPosRankSum=-0.273;SOR=0.709	GT:AD:DP:GQ:PL	0/1:35,19:54:99:476,0,1129	4	3.79459	4.09584	0.742166	2.21586	2.35913	4.20006
d225005	Ib	cindr	FBgn0027598	1	3R:30808926	0.357143	3R	30808926	G	T	GT	FALSE	42	328.6	AC=1;AF=0.500;AN=2;BaseQRankSum=-2.915;DP=42;ExcessHet=3.0103;FS=1.562;MLEAC=1;MLEAF=0.500;MQ=60.00;MQRankSum=0.000;QD=7.82;ReadPosRankSum=-1.423;SOR=0.331	GT:AD:DP:GQ:PL	0/1:27,15:42:99:336,0,744	4	3.79459	4.09584	0.742166	2.21586	2.35913	4.20006
d225005	Ib	cindr	FBgn0027598	1	3R:30809018	0.326531	3R	30809018	G	A	GA	FALSE	49	559.6	AC=1;AF=0.500;AN=2;BaseQRankSum=-4.010;DP=49;ExcessHet=3.0103;FS=10.186;MLEAC=1;MLEAF=0.500;MQ=60.00;MQRankSum=0.000;QD=11.42;ReadPosRankSum=0.357;SOR=0.044	GT:AD:DP:GQ:PL	0/1:33,16:49:99:567,0,1338	4	3.79459	4.09584	0.742166	2.21586	2.35913	4.20006
d225005	Ib	cindr	FBgn0027598	1	3R:30809019	0.326531	3R	30809019	C	G	CG	FALSE	49	559.6	AC=1;AF=0.500;AN=2;BaseQRankSum=1.620;DP=49;ExcessHet=3.0103;FS=10.186;MLEAC=1;MLEAF=0.500;MQ=60.00;MQRankSum=0.000;QD=11.42;ReadPosRankSum=0.573;SOR=0.044	GT:AD:DP:GQ:PL	0/1:33,16:49:99:567,0,1338	4	3.79459	4.09584	0.742166	2.21586	2.35913	4.20006
d225005	Ib	cindr	FBgn0027598	1	3R:30809037	0.392857	3R	30809037	G	A	GA	FALSE	28	403.6	AC=1;AF=0.500;AN=2;BaseQRankSum=-4.634;DP=28;ExcessHet=3.0103;FS=12.979;MLEAC=1;MLEAF=0.500;MQ=60.00;MQRankSum=0.000;QD=14.41;ReadPosRankSum=-0.316;SOR=0.016	GT:AD:DP:GQ:PL	0/1:17,11:28:99:411,0,681	4	3.79459	4.09584	0.742166	2.21586	2.35913	4.20006
d225005	Ib	ATPsynC	FBgn0039830	-1	3R:31216146	0.243243	3R	31216146	C	G	GC	FALSE	37	114.6	AC=1;AF=0.500;AN=2;BaseQRankSum=-0.949;DP=37;ExcessHet=3.0103;FS=0.000;MLEAC=1;MLEAF=0.500;MQ=60.00;MQRankSum=0.000;QD=3.10;ReadPosRankSum=-2.846;SOR=0.112	GT:AD:DP:GQ:PL	0/1:28,9:37:99:122,0,1037	4	11.1635	10.7949	0.844312	9.43094	10.1027	4.20006
d225005	Ib	CG9776	FBgn0027866	-1	3R:4327955	0.677419	3R	4327955	G	A	CT	FALSE	31	809.6	AC=1;AF=0.500;AN=2;BaseQRankSum=-3.469;DP=31;ExcessHet=3.0103;FS=7.638;MLEAC=1;MLEAF=0.500;MQ=60.00;MQRankSum=0.000;QD=26.12;ReadPosRankSum=-2.937;SOR=2.527	GT:AD:DP:GQ:PL	0/1:10,21:31:99:817,0,357	4	1.91917	1.47521	0.0215595	0.874673	0.872167	4.20006
d225005	Ib	RpL13A	FBgn0037351	1	3R:5625129	0.569328	3R	5625129	A	C	AC	FALSE	563	10026.6	AC=1;AF=0.500;AN=2;BaseQRankSum=2.330;DP=563;ExcessHet=3.0103;FS=45.806;MLEAC=1;MLEAF=0.500;MQ=60.00;MQRankSum=0.000;QD=21.06;ReadPosRankSum=10.927;SOR=0.891	GT:AD:DP:GQ:PL	0/1:205,271:476:99:10034,0,2118	4	11.8685	11.8339	0.899746	11.5663	11.4694	4.20006
d225005	Ib	RpL13A	FBgn0037351	1	3R:5625946	0.244094	3R	5625946	T	C	TC	FALSE	131	677.6	AC=1;AF=0.500;AN=2;BaseQRankSum=4.266;DP=131;ExcessHet=3.0103;FS=19.204;MLEAC=1;MLEAF=0.500;MQ=60.00;MQRankSum=0.000;QD=5.34;ReadPosRankSum=-2.813;SOR=3.967	GT:AD:DP:GQ:PL	0/1:96,31:127:99:685,0,3323	4	11.8685	11.8339	0.899746	11.5663	11.4694	4.20006
d225005	Ib	RpL13A	FBgn0037351	1	3R:5625947	0.338462	3R	5625947	T	C	TC	FALSE	71	1259.6	AC=1;AF=0.500;AN=2;BaseQRankSum=5.551;DP=71;ExcessHet=3.0103;FS=5.313;MLEAC=1;MLEAF=0.500;MQ=60.00;MQRankSum=0.000;QD=19.38;ReadPosRankSum=-4.907;SOR=1.688	GT:AD:DP:GQ:PL	0/1:43,22:65:99:1267,0,1083	4	11.8685	11.8339	0.899746	11.5663	11.4694	4.20006
d225005	Ib	CG10098	FBgn0037472	1	3R:7125013	0.189003	3R	7125013	G	A	GA	FALSE	293	958.6	AC=1;AF=0.500;AN=2;BaseQRankSum=-8.703;DP=293;ExcessHet=3.0103;FS=1.869;MLEAC=1;MLEAF=0.500;MQ=60.00;MQRankSum=0.000;QD=3.29;ReadPosRankSum=0.410;SOR=0.543	GT:AD:DP:GQ:PL	0/1:236,55:291:99:966,0,7823	4	7.56827	7.95228	0.660138	1.89634	2.58499	4.20006
d225005	Ib	Calr	FBgn0005585	-1	3R:9629470	0.167002	3R	9629470	A	T	TA	FALSE	497	1217.6	AC=1;AF=0.500;AN=2;BaseQRankSum=-8.552;DP=497;ExcessHet=3.0103;FS=61.695;MLEAC=1;MLEAF=0.500;MQ=60.00;MQRankSum=0.000;QD=2.45;ReadPosRankSum=-8.497;SOR=4.277	GT:AD:DP:GQ:PL	0/1:414,83:497:99:1225,0,17428	4	8.00271	7.91268	0.863881	5.21074	5.17307	4.20006
d225005	Ib	RpS29	FBgn0261599	1	3R:9778105	0.317073	3R	9778105	C	T	CT	FALSE	41	232.6	AC=1;AF=0.500;AN=2;BaseQRankSum=-1.767;DP=41;ExcessHet=3.0103;FS=7.970;MLEAC=1;MLEAF=0.500;MQ=60.00;MQRankSum=0.000;QD=5.67;ReadPosRankSum=0.970;SOR=2.584	GT:AD:DP:GQ:PL	0/1:28,13:41:99:240,0,759	4	13.008	12.7953	0.00458224	13.023	12.9522	4.20006
d225005	Ib	RpS29	FBgn0261599	1	3R:9779080	0.145695	3R	9779080	T	C	TC	FALSE	152	381.6	AC=1;AF=0.500;AN=2;BaseQRankSum=1.724;DP=152;ExcessHet=3.0103;FS=29.218;MLEAC=1;MLEAF=0.500;MQ=60.00;MQRankSum=0.000;QD=2.53;ReadPosRankSum=-5.774;SOR=4.565	GT:AD:DP:GQ:PL	0/1:129,22:151:99:389,0,5485	4	13.008	12.7953	0.00458224	13.023	12.9522	4.20006
d225005	Ib	RpS29	FBgn0261599	1	3R:9779082	0.119205	3R	9779082	T	A	TA	FALSE	151	287.6	AC=1;AF=0.500;AN=2;BaseQRankSum=-3.486;DP=151;ExcessHet=3.0103;FS=24.519;MLEAC=1;MLEAF=0.500;MQ=60.00;MQRankSum=0.000;QD=1.90;ReadPosRankSum=-5.202;SOR=4.380	GT:AD:DP:GQ:PL	0/1:133,18:151:99:295,0,5531	4	13.008	12.7953	0.00458224	13.023	12.9522	4.20006
d225005	Ib	RpS29	FBgn0261599	1	3R:9779083	0.110345	3R	9779083	T	A	TA	FALSE	145	150.6	AC=1;AF=0.500;AN=2;BaseQRankSum=-2.663;DP=145;ExcessHet=3.0103;FS=22.091;MLEAC=1;MLEAF=0.500;MQ=60.00;MQRankSum=0.000;QD=1.04;ReadPosRankSum=-6.038;SOR=4.249	GT:AD:DP:GQ:PL	0/1:129,16:145:99:158,0,5466	4	13.008	12.7953	0.00458224	13.023	12.9522	4.20006
d225005	Ib	RpS29	FBgn0261599	1	3R:9779084	0.111111	3R	9779084	T	A	TA	FALSE	144	153.6	AC=1;AF=0.500;AN=2;BaseQRankSum=0.499;DP=144;ExcessHet=3.0103;FS=24.749;MLEAC=1;MLEAF=0.500;MQ=60.00;MQRankSum=0.000;QD=1.07;ReadPosRankSum=-6.527;SOR=4.271	GT:AD:DP:GQ:PL	0/1:128,16:144:99:161,0,5424	4	13.008	12.7953	0.00458224	13.023	12.9522	4.20006
d225005	Ib	CaMKII	FBgn0264607	-1	4:1036249	0.214953	4	1036249	A	G	TC	FALSE	107	442.6	AC=1;AF=0.500;AN=2;BaseQRankSum=-0.491;DP=107;ExcessHet=3.0103;FS=54.372;MLEAC=1;MLEAF=0.500;MQ=60.00;MQRankSum=0.000;QD=4.14;ReadPosRankSum=-2.644;SOR=3.992	GT:AD:DP:GQ:PL	0/1:84,23:107:99:450,0,2511	4	5.2182	6.31018	0.00382197	4.24825	4.00233	4.20006
d225005	Ib	PMCA	FBgn0259214	-1	4:349103	0.22695	4	349103	G	A	CT	FALSE	141	460.6	AC=1;AF=0.500;AN=2;BaseQRankSum=-5.605;DP=141;ExcessHet=3.0103;FS=2.572;MLEAC=1;MLEAF=0.500;MQ=60.00;MQRankSum=0.000;QD=3.27;ReadPosRankSum=0.084;SOR=0.950	GT:AD:DP:GQ:PL	0/1:109,32:141:99:468,0,3445	4	6.4592	6.25698	0.913864	3.31965	2.89969	4.20006
d225005	Ib	Hsc70-3	FBgn0001218	-1	X:11802533	0.12605	X	11802533	C	T	GA	FALSE	239	305.6	AC=1;AF=0.500;AN=2;BaseQRankSum=-4.797;DP=239;ExcessHet=3.0103;FS=0.000;MLEAC=1;MLEAF=0.500;MQ=60.00;MQRankSum=0.000;QD=1.28;ReadPosRankSum=0.085;SOR=0.639	GT:AD:DP:GQ:PL	0/1:208,30:238:99:313,0,7106	4	6.55093	7.16649	0.0144615	4.97503	4.25853	4.20006
d225005	Ib	REG	FBgn0029133	1	X:13213496	1	X	13213496	C	T	CT	FALSE	19	565.03	AC=2;AF=1.00;AN=2;DP=19;ExcessHet=3.0103;FS=0.000;MLEAC=2;MLEAF=1.00;MQ=60.00;QD=29.74;SOR=0.793	GT:AD:DP:GQ:PL	1/1:0,19:19:57:579,57,0	4	5.58078	5.43353	0.784806	3.00443	3.1644	4.20006
d225005	Ib	sbm	FBgn0030574	-1	X:14585710	0.872549	X	14585710	T	A	AT	FALSE	102	2560.6	AC=1;AF=0.500;AN=2;BaseQRankSum=-2.134;DP=102;ExcessHet=3.0103;FS=1.136;MLEAC=1;MLEAF=0.500;MQ=60.00;MQRankSum=0.000;QD=25.10;ReadPosRankSum=0.312;SOR=0.507	GT:AD:DP:GQ:PL	0/1:13,89:102:99:2568,0,164	4	5.35192	4.91139	0.69258	2.81017	2.98625	4.20006
d225005	Ib	hiw	FBgn0030600	-1	X:15010886	0.75	X	15010886	A	G	TC	FALSE	56	1258.6	AC=1;AF=0.500;AN=2;BaseQRankSum=0.957;DP=56;ExcessHet=3.0103;FS=31.542;MLEAC=1;MLEAF=0.500;MQ=60.00;MQRankSum=0.000;QD=22.48;ReadPosRankSum=2.124;SOR=3.343	GT:AD:DP:GQ:PL	0/1:14,42:56:99:1266,0,319	4	1.94674	2.4482	0.178417	0.0207204	0.0219914	4.20006
d225005	Ib	CG43737	FBgn0263994	1	X:15175839	0.476965	X	15175839	C	T	CT	FALSE	369	7116.6	AC=1;AF=0.500;AN=2;BaseQRankSum=-5.780;DP=369;ExcessHet=3.0103;FS=2.485;MLEAC=1;MLEAF=0.500;MQ=60.00;MQRankSum=0.000;QD=19.29;ReadPosRankSum=-4.063;SOR=0.839	GT:AD:DP:GQ:PL	0/1:193,176:369:99:7124,0,8770	4	4.63614	1.17921	4.70339e-15	0.0250792	0.0176775	4.20006
d225005	Ib	HUWE1	FBgn0030674	1	X:15731262	1	X	15731262	T	C	TC	FALSE	88	2945.03	AC=2;AF=1.00;AN=2;DP=88;ExcessHet=3.0103;FS=0.000;MLEAC=2;MLEAF=1.00;MQ=60.00;QD=33.47;SOR=0.836	GT:AD:DP:GQ:PL	1/1:0,88:88:99:2959,261,0	4	2.34178	2.49123	0.920489	0.953593	0.788892	4.20006
d225005	Ib	CCT6	FBgn0027329	1	X:15748628	0.398422	X	15748628	G	C	GC	FALSE	507	5805.6	AC=1;AF=0.500;AN=2;BaseQRankSum=11.037;DP=507;ExcessHet=3.0103;FS=3.291;MLEAC=1;MLEAF=0.500;MQ=60.00;MQRankSum=0.000;QD=11.45;ReadPosRankSum=0.287;SOR=0.942	GT:AD:DP:GQ:PL	0/1:305,202:507:99:5813,0,8799	4	5.6948	6.01726	0.845324	2.83705	2.93949	4.20006
d225005	Ib	Gapdh2	FBgn0001092	1	X:15869496	0.43941	X	15869496	G	A	GA	FALSE	952	9874.6	AC=1;AF=0.500;AN=2;BaseQRankSum=-15.051;DP=952;ExcessHet=3.0103;FS=4.382;MLEAC=1;MLEAF=0.500;MQ=60.00;MQRankSum=0.000;QD=10.41;ReadPosRankSum=-1.319;SOR=1.003	GT:AD:DP:GQ:PL	0/1:532,417:949:99:9882,0,16501	4	11.2878	10.1547	0.10216	9.85262	10.5896	4.20006
d225005	Ib	MSBP	FBgn0030703	-1	X:15887770	0.774194	X	15887770	G	T	CA	FALSE	186	4527.6	AC=1;AF=0.500;AN=2;BaseQRankSum=-1.376;DP=186;ExcessHet=3.0103;FS=3.137;MLEAC=1;MLEAF=0.500;MQ=60.00;MQRankSum=0.000;QD=24.34;ReadPosRankSum=-0.840;SOR=1.174	GT:AD:DP:GQ:PL	0/1:42,144:186:99:4535,0,916	4	5.23773	4.65818	0.566046	4.38139	3.65296	4.20006
d225005	Ib	ND-20	FBgn0030718	-1	X:15986405	0.33121	X	15986405	G	A	CT	FALSE	314	2530.6	AC=1;AF=0.500;AN=2;BaseQRankSum=-7.520;DP=314;ExcessHet=3.0103;FS=2.664;MLEAC=1;MLEAF=0.500;MQ=60.00;MQRankSum=0.000;QD=8.06;ReadPosRankSum=1.346;SOR=0.533	GT:AD:DP:GQ:PL	0/1:210,104:314:99:2538,0,6538	4	6.55873	6.31628	0.939949	5.64644	5.42381	4.20006
d225005	Ib	RpS19a	FBgn0010412	1	X:16638920	0.33	X	16638920	T	C	TC	FALSE	104	213.04	AC=1;AF=0.500;AN=2;BaseQRankSum=0.821;DP=104;ExcessHet=3.0103;FS=12.525;MLEAC=1;MLEAF=0.500;MQ=60.00;MQRankSum=0.000;QD=2.13;ReadPosRankSum=-2.081;SOR=3.132	GT:AD:DP:GQ:PL	0/1:67,33:100:99:712,0,2706	4	12.0673	11.6508	0.0205362	11.5679	11.4404	4.20006
d225005	Ib	RpS19a	FBgn0010412	1	X:16638922	0.123288	X	16638922	C	A	CA	FALSE	101	61.6	AC=1;AF=0.500;AN=2;BaseQRankSum=-2.670;DP=101;ExcessHet=3.0103;FS=9.776;MLEAC=1;MLEAF=0.500;MQ=60.00;MQRankSum=0.000;QD=0.84;ReadPosRankSum=-2.833;SOR=2.712	GT:AD:DP:GQ:PL	0/1:64,9:73:69:69,0,2681	4	12.0673	11.6508	0.0205362	11.5679	11.4404	4.20006
d225005	Ib	RpS19a	FBgn0010412	1	X:16638923	0.130435	X	16638923	G	A	GA	FALSE	97	64.6	AC=1;AF=0.500;AN=2;BaseQRankSum=-2.925;DP=97;ExcessHet=3.0103;FS=7.187;MLEAC=1;MLEAF=0.500;MQ=60.00;MQRankSum=0.000;QD=0.94;ReadPosRankSum=-4.025;SOR=2.252	GT:AD:DP:GQ:PL	0/1:60,9:69:72:72,0,2642	4	12.0673	11.6508	0.0205362	11.5679	11.4404	4.20006
d225005	Ib	RpS5a	FBgn0002590	-1	X:17143589	0.307692	X	17143589	A	T	TA	FALSE	16	130.6	AC=1;AF=0.500;AN=2;BaseQRankSum=-0.277;DP=16;ExcessHet=3.0103;FS=0.000;MLEAC=1;MLEAF=0.500;MQ=60.00;MQRankSum=0.000;QD=10.05;ReadPosRankSum=-1.139;SOR=1.508	GT:AD:DP:GQ:PL	0/1:9,4:13:99:138,0,258	4	11.5025	11.454	0.56445	11.0228	10.8875	4.20006
d225005	Ib	beta-Spec	FBgn0250788	1	X:17666694	0.294118	X	17666694	C	T	CT	FALSE	17	75.6	AC=1;AF=0.500;AN=2;BaseQRankSum=-1.887;DP=17;ExcessHet=3.0103;FS=0.000;MLEAC=1;MLEAF=0.500;MQ=60.00;MQRankSum=0.000;QD=4.45;ReadPosRankSum=1.448;SOR=0.437	GT:AD:DP:GQ:PL	0/1:12,5:17:83:83,0,438	4	5.07595	5.36642	0.2675	1.74199	1.75548	4.20006
d225005	Ib	mnb	FBgn0259168	-1	X:17886551	0.4	X	17886551	G	C	CG	FALSE	45	490.6	AC=1;AF=0.500;AN=2;BaseQRankSum=0.895;DP=45;ExcessHet=3.0103;FS=0.000;MLEAC=1;MLEAF=0.500;MQ=60.00;MQRankSum=0.000;QD=10.90;ReadPosRankSum=-1.149;SOR=0.556	GT:AD:DP:GQ:PL	0/1:27,18:45:99:498,0,812	4	3.70919	3.58111	0.880478	2.62646	2.08048	4.20006
d225005	Ib	CG42376	FBgn0259722	1	X:255174	0.191223	X	255174	G	A	GA	FALSE	321	990.6	AC=1;AF=0.500;AN=2;BaseQRankSum=-1.340;DP=321;ExcessHet=3.0103;FS=1.097;MLEAC=1;MLEAF=0.500;MQ=60.00;MQRankSum=0.000;QD=3.11;ReadPosRankSum=-1.863;SOR=0.781	GT:AD:DP:GQ:PL	0/1:258,61:319:99:998,0,7570	4	4.97424	4.74827	0.632161	3.32849	3.19304	4.20006
d225005	Ib	RpL35	FBgn0029785	1	X:5673543	0.363636	X	5673543	G	A	GA	FALSE	44	206.6	AC=1;AF=0.500;AN=2;BaseQRankSum=-1.940;DP=44;ExcessHet=3.0103;FS=14.312;MLEAC=1;MLEAF=0.500;MQ=60.00;MQRankSum=0.000;QD=4.70;ReadPosRankSum=-0.623;SOR=3.669	GT:AD:DP:GQ:PL	0/1:28,16:44:99:214,0,914	4	12.0126	11.8795	0.14425	11.389	11.0611	4.20006
d225005	Ib	RpL36	FBgn0002579	-1	X:628349	0.131579	X	628349	A	G	TC	FALSE	40	36.6	AC=1;AF=0.500;AN=2;BaseQRankSum=3.271;DP=40;ExcessHet=3.0103;FS=2.493;MLEAC=1;MLEAF=0.500;MQ=60.00;MQRankSum=0.000;QD=0.96;ReadPosRankSum=-1.811;SOR=1.670	GT:AD:DP:GQ:PL	0/1:33,5:38:44:44,0,865	4	12.5408	12.409	0.0743139	11.7929	11.5989	4.20006
d225005	Ib	pod1	FBgn0029903	1	X:6813666	1	X	6813666	G	A	GA	FALSE	84	2780.03	AC=2;AF=1.00;AN=2;DP=84;ExcessHet=3.0103;FS=0.000;MLEAC=2;MLEAF=1.00;MQ=60.00;QD=33.10;SOR=2.861	GT:AD:DP:GQ:PL	1/1:0,84:84:99:2794,253,0	4	2.93974	3.61414	0.571121	0.849529	0.746895	4.20006
d225005	Ib	Sxl	FBgn0264270	-1	X:7075831	1	X	7075831	C	T	GA	FALSE	17	592.03	AC=2;AF=1.00;AN=2;DP=17;ExcessHet=3.0103;FS=0.000;MLEAC=2;MLEAF=1.00;MQ=60.00;QD=34.83;SOR=1.061	GT:AD:DP:GQ:PL	1/1:0,17:17:51:606,51,0	4	4.65086	4.22784	0.16069	3.03478	2.89005	4.20006
d225005	Ib	Nrg	FBgn0264975	1	X:8517710	1	X	8517710	G	A	GA	FALSE	39	1302.03	AC=2;AF=1.00;AN=2;DP=39;ExcessHet=3.0103;FS=0.000;MLEAC=2;MLEAF=1.00;MQ=60.00;QD=33.39;SOR=4.461	GT:AD:DP:GQ:PL	1/1:0,39:39:99:1316,116,0	4	5.59291	5.71762	0.88586	2.05802	2.32538	4.20006
d225006	Ib	CG33303	FBgn0053303	-1	2L:10374282	0.758621	2L	10374282	A	T	TA	FALSE	29	523.6	AC=1;AF=0.500;AN=2;BaseQRankSum=-0.352;DP=29;ExcessHet=3.0103;FS=0.000;MLEAC=1;MLEAF=0.500;MQ=60.00;MQRankSum=0.000;QD=18.06;ReadPosRankSum=-0.673;SOR=1.112	GT:AD:DP:GQ:PL	0/1:7,22:29:99:531,0,119	4	4.82255	3.93282	0.505552	2.43097	2.84372	0.333424
d225006	Ib	CG33303	FBgn0053303	-1	2L:10374508	0.794872	2L	10374508	A	G	TC	FALSE	39	992.6	AC=1;AF=0.500;AN=2;BaseQRankSum=1.968;DP=39;ExcessHet=3.0103;FS=0.000;MLEAC=1;MLEAF=0.500;MQ=60.00;MQRankSum=0.000;QD=25.45;ReadPosRankSum=-1.138;SOR=0.476	GT:AD:DP:GQ:PL	0/1:8,31:39:99:1000,0,173	4	4.82255	3.93282	0.505552	2.43097	2.84372	0.333424
d225006	Ib	CG33303	FBgn0053303	-1	2L:10374631	0.86	2L	10374631	G	A	CT	FALSE	50	1289.6	AC=1;AF=0.500;AN=2;BaseQRankSum=-3.203;DP=50;ExcessHet=3.0103;FS=6.591;MLEAC=1;MLEAF=0.500;MQ=60.00;MQRankSum=0.000;QD=25.79;ReadPosRankSum=0.183;SOR=0.120	GT:AD:DP:GQ:PL	0/1:7,43:50:99:1297,0,117	4	4.82255	3.93282	0.505552	2.43097	2.84372	0.333424
d225006	Ib	CG33303	FBgn0053303	-1	2L:10374889	0.886364	2L	10374889	C	G	GC	FALSE	44	1281.6	AC=1;AF=0.500;AN=2;BaseQRankSum=-0.350;DP=44;ExcessHet=3.0103;FS=0.000;MLEAC=1;MLEAF=0.500;MQ=60.00;MQRankSum=0.000;QD=29.13;ReadPosRankSum=-0.798;SOR=0.510	GT:AD:DP:GQ:PL	0/1:5,39:44:66:1289,0,66	4	4.82255	3.93282	0.505552	2.43097	2.84372	0.333424
d225006	Ib	CG33303	FBgn0053303	-1	2L:10374901	0.877193	2L	10374901	G	C	CG	FALSE	57	1599.6	AC=1;AF=0.500;AN=2;BaseQRankSum=-1.519;DP=57;ExcessHet=3.0103;FS=1.514;MLEAC=1;MLEAF=0.500;MQ=60.00;MQRankSum=0.000;QD=28.06;ReadPosRankSum=0.000;SOR=0.591	GT:AD:DP:GQ:PL	0/1:7,50:57:99:1607,0,112	4	4.82255	3.93282	0.505552	2.43097	2.84372	0.333424
d225006	Ib	CG33303	FBgn0053303	-1	2L:10375153	0.858824	2L	10375153	A	G	TC	FALSE	85	2113.04	AC=1;AF=0.500;AN=2;BaseQRankSum=4.055;DP=85;ExcessHet=3.0103;FS=0.000;MLEAC=1;MLEAF=0.500;MQ=60.00;MQRankSum=0.000;QD=24.86;SOR=0.840	GT:AD:DP:GQ:PL	0/1:12,73:85:91:2340,0,91	4	4.82255	3.93282	0.505552	2.43097	2.84372	0.333424
d225006	Ib	CG33303	FBgn0053303	-1	2L:10375320	0.897959	2L	10375320	G	A	CT	FALSE	49	1338.6	AC=1;AF=0.500;AN=2;BaseQRankSum=-2.017;DP=49;ExcessHet=3.0103;FS=0.000;MLEAC=1;MLEAF=0.500;MQ=60.00;MQRankSum=0.000;QD=27.32;ReadPosRankSum=0.498;SOR=0.512	GT:AD:DP:GQ:PL	0/1:5,44:49:28:1346,0,28	4	4.82255	3.93282	0.505552	2.43097	2.84372	0.333424
d225006	Ib	CG33303	FBgn0053303	-1	2L:10375492	0.738095	2L	10375492	T	G	AC	FALSE	42	960.6	AC=1;AF=0.500;AN=2;BaseQRankSum=3.385;DP=42;ExcessHet=3.0103;FS=0.000;MLEAC=1;MLEAF=0.500;MQ=60.00;MQRankSum=0.000;QD=22.87;ReadPosRankSum=-0.387;SOR=0.787	GT:AD:DP:GQ:PL	0/1:11,31:42:99:968,0,217	4	4.82255	3.93282	0.505552	2.43097	2.84372	0.333424
d225006	Ib	salr	FBgn0000287	1	2L:11359194	1	2L	11359194	G	A	GA	FALSE	11	348.02	AC=2;AF=1.00;AN=2;DP=11;ExcessHet=3.0103;FS=0.000;MLEAC=2;MLEAF=1.00;MQ=60.00;QD=31.64;SOR=3.442	GT:AD:DP:GQ:PL	1/1:0,11:11:33:362,33,0	4	3.36969	2.9991	0.771618	0.202178	0.0214256	0.333424
d225006	Ib	CG31705	FBgn0028490	-1	2L:11523537	0.358974	2L	11523537	A	G	TC	FALSE	78	998.6	AC=1;AF=0.500;AN=2;BaseQRankSum=1.626;DP=78;ExcessHet=3.0103;FS=0.000;MLEAC=1;MLEAF=0.500;MQ=60.00;MQRankSum=0.000;QD=12.80;ReadPosRankSum=-1.151;SOR=0.600	GT:AD:DP:GQ:PL	0/1:50,28:78:99:1006,0,1981	4	4.03693	4.29753	0.767202	4.24038	4.53465	0.333424
d225006	Ib	CG31705	FBgn0028490	-1	2L:11523540	0.350649	2L	11523540	C	T	GA	FALSE	77	1026.6	AC=1;AF=0.500;AN=2;BaseQRankSum=-3.725;DP=77;ExcessHet=3.0103;FS=0.000;MLEAC=1;MLEAF=0.500;MQ=60.00;MQRankSum=0.000;QD=13.33;ReadPosRankSum=-0.976;SOR=0.719	GT:AD:DP:GQ:PL	0/1:50,27:77:99:1034,0,2001	4	4.03693	4.29753	0.767202	4.24038	4.53465	0.333424
d225006	Ib	CG31705	FBgn0028490	-1	2L:11524089	0.725	2L	11524089	C	T	GA	FALSE	40	853.6	AC=1;AF=0.500;AN=2;BaseQRankSum=-3.930;DP=40;ExcessHet=3.0103;FS=0.000;MLEAC=1;MLEAF=0.500;MQ=60.00;MQRankSum=0.000;QD=21.34;ReadPosRankSum=-1.206;SOR=0.734	GT:AD:DP:GQ:PL	0/1:11,29:40:99:861,0,285	4	4.03693	4.29753	0.767202	4.24038	4.53465	0.333424
d225006	Ib	CG31705	FBgn0028490	-1	2L:11524209	0.777778	2L	11524209	A	G	TC	FALSE	54	1312.6	AC=1;AF=0.500;AN=2;BaseQRankSum=1.454;DP=54;ExcessHet=3.0103;FS=1.266;MLEAC=1;MLEAF=0.500;MQ=60.00;MQRankSum=0.000;QD=24.31;ReadPosRankSum=0.386;SOR=0.446	GT:AD:DP:GQ:PL	0/1:12,42:54:99:1320,0,263	4	4.03693	4.29753	0.767202	4.24038	4.53465	0.333424
d225006	Ib	CG31705	FBgn0028490	-1	2L:11524851	0.642857	2L	11524851	A	T	TA	FALSE	42	697.6	AC=1;AF=0.500;AN=2;BaseQRankSum=0.283;DP=42;ExcessHet=3.0103;FS=0.000;MLEAC=1;MLEAF=0.500;MQ=60.00;MQRankSum=0.000;QD=16.61;ReadPosRankSum=1.305;SOR=0.555	GT:AD:DP:GQ:PL	0/1:15,27:42:99:705,0,367	4	4.03693	4.29753	0.767202	4.24038	4.53465	0.333424
d225006	Ib	CG31705	FBgn0028490	-1	2L:11524947	0.566667	2L	11524947	G	A	CT	FALSE	30	484.6	AC=1;AF=0.500;AN=2;BaseQRankSum=-0.593;DP=30;ExcessHet=3.0103;FS=1.484;MLEAC=1;MLEAF=0.500;MQ=60.00;MQRankSum=0.000;QD=16.15;ReadPosRankSum=0.231;SOR=1.179	GT:AD:DP:GQ:PL	0/1:13,17:30:99:492,0,359	4	4.03693	4.29753	0.767202	4.24038	4.53465	0.333424
d225006	Ib	CG31705	FBgn0028490	-1	2L:11525043	0.4	2L	11525043	A	T	TA	FALSE	35	354.6	AC=1;AF=0.500;AN=2;BaseQRankSum=3.931;DP=35;ExcessHet=3.0103;FS=1.421;MLEAC=1;MLEAF=0.500;MQ=60.00;MQRankSum=0.000;QD=10.13;ReadPosRankSum=1.421;SOR=1.099	GT:AD:DP:GQ:PL	0/1:21,14:35:99:362,0,462	4	4.03693	4.29753	0.767202	4.24038	4.53465	0.333424
d225006	Ib	CG31705	FBgn0028490	-1	2L:11525268	0.5	2L	11525268	G	T	CA	FALSE	42	579.6	AC=1;AF=0.500;AN=2;BaseQRankSum=-2.181;DP=42;ExcessHet=3.0103;FS=2.963;MLEAC=1;MLEAF=0.500;MQ=60.00;MQRankSum=0.000;QD=13.80;ReadPosRankSum=-0.480;SOR=0.263	GT:AD:DP:GQ:PL	0/1:21,21:42:99:587,0,554	4	4.03693	4.29753	0.767202	4.24038	4.53465	0.333424
d225006	Ib	kek2	FBgn0015400	1	2L:11582074	1	2L	11582074	A	C	AC	FALSE	18	592.03	AC=2;AF=1.00;AN=2;DP=18;ExcessHet=3.0103;FS=0.000;MLEAC=2;MLEAF=1.00;MQ=60.00;QD=32.89;SOR=2.833	GT:AD:DP:GQ:PL	1/1:0,18:18:54:606,54,0	4	2.63563	2.29434	0.975751	0.059752	0.0131443	0.333424
d225006	Ib	kek2	FBgn0015400	1	2L:11582104	1	2L	11582104	G	A	GA	FALSE	11	364.02	AC=2;AF=1.00;AN=2;DP=11;ExcessHet=3.0103;FS=0.000;MLEAC=2;MLEAF=1.00;MQ=60.00;QD=33.09;SOR=1.802	GT:AD:DP:GQ:PL	1/1:0,11:11:33:378,33,0	4	2.63563	2.29434	0.975751	0.059752	0.0131443	0.333424
d225006	Ib	kek2	FBgn0015400	1	2L:11582201	1	2L	11582201	G	A	GA	FALSE	20	709.03	AC=2;AF=1.00;AN=2;DP=20;ExcessHet=3.0103;FS=0.000;MLEAC=2;MLEAF=1.00;MQ=60.00;QD=36.20;SOR=3.056	GT:AD:DP:GQ:PL	1/1:0,20:20:60:723,60,0	4	2.63563	2.29434	0.975751	0.059752	0.0131443	0.333424
d225006	Ib	kek2	FBgn0015400	1	2L:11582245	1	2L	11582245	A	C	AC	FALSE	19	738.03	AC=2;AF=1.00;AN=2;DP=19;ExcessHet=3.0103;FS=0.000;MLEAC=2;MLEAF=1.00;MQ=60.00;QD=30.51;SOR=0.793	GT:AD:DP:GQ:PL	1/1:0,19:19:57:752,57,0	4	2.63563	2.29434	0.975751	0.059752	0.0131443	0.333424
d225006	Ib	CycY	FBgn0032378	-1	2L:11812342	0.178571	2L	11812342	A	G	TC	FALSE	28	70.6	AC=1;AF=0.500;AN=2;BaseQRankSum=0.508;DP=28;ExcessHet=3.0103;FS=0.000;MLEAC=1;MLEAF=0.500;MQ=60.00;MQRankSum=0.000;QD=2.52;ReadPosRankSum=0.847;SOR=0.665	GT:AD:DP:GQ:PL	0/1:23,5:28:78:78,0,668	4	3.19262	3.065	0.519469	1.64804	1.40216	0.333424
d225006	Ib	CG6766	FBgn0032398	-1	2L:12039110	0.360656	2L	12039110	C	G	GC	FALSE	61	557.6	AC=1;AF=0.500;AN=2;BaseQRankSum=0.008;DP=61;ExcessHet=3.0103;FS=3.688;MLEAC=1;MLEAF=0.500;MQ=60.00;MQRankSum=0.000;QD=9.14;ReadPosRankSum=0.978;SOR=0.343	GT:AD:DP:GQ:PL	0/1:39,22:61:99:565,0,1171	4	4.1349	3.57008	0.504679	2.47451	2.25646	0.333424
d225006	Ib	RpL7-like	FBgn0032404	1	2L:12056396	0.662338	2L	12056396	T	A	TA	FALSE	77	1342.6	AC=1;AF=0.500;AN=2;BaseQRankSum=-1.623;DP=77;ExcessHet=3.0103;FS=8.153;MLEAC=1;MLEAF=0.500;MQ=60.00;MQRankSum=0.000;QD=17.44;ReadPosRankSum=-0.856;SOR=1.903	GT:AD:DP:GQ:PL	0/1:26,51:77:99:1350,0,569	4	5.14975	5.56099	0.4882	4.25872	4.13646	0.333424
d225006	Ib	RpL7-like	FBgn0032404	1	2L:12056632	0.718182	2L	12056632	A	T	AT	FALSE	110	2176.6	AC=1;AF=0.500;AN=2;BaseQRankSum=-1.032;DP=110;ExcessHet=3.0103;FS=8.656;MLEAC=1;MLEAF=0.500;MQ=60.00;MQRankSum=0.000;QD=19.79;ReadPosRankSum=-0.507;SOR=0.233	GT:AD:DP:GQ:PL	0/1:31,79:110:99:2184,0,680	4	5.14975	5.56099	0.4882	4.25872	4.13646	0.333424
d225006	Ib	Pex19	FBgn0032407	1	2L:12094055	0.559211	2L	12094055	G	A	GA	FALSE	152	2262.6	AC=1;AF=0.500;AN=2;BaseQRankSum=-5.336;DP=152;ExcessHet=3.0103;FS=8.471;MLEAC=1;MLEAF=0.500;MQ=60.00;MQRankSum=0.000;QD=14.89;ReadPosRankSum=0.462;SOR=1.013	GT:AD:DP:GQ:PL	0/1:67,85:152:99:2270,0,1780	4	5.52679	4.58011	0.198542	3.35329	3.35545	0.333424
d225006	Ib	Pex19	FBgn0032407	1	2L:12094069	0.56	2L	12094069	A	C	AC	FALSE	175	3843.6	AC=1;AF=0.500;AN=2;BaseQRankSum=7.072;DP=175;ExcessHet=3.0103;FS=16.379;MLEAC=1;MLEAF=0.500;MQ=60.00;MQRankSum=0.000;QD=21.96;ReadPosRankSum=0.894;SOR=0.950	GT:AD:DP:GQ:PL	0/1:77,98:175:99:3851,0,3015	4	5.52679	4.58011	0.198542	3.35329	3.35545	0.333424
d225006	Ib	Pex19	FBgn0032407	1	2L:12094077	0.548718	2L	12094077	C	G	CG	FALSE	195	4045.6	AC=1;AF=0.500;AN=2;BaseQRankSum=2.818;DP=195;ExcessHet=3.0103;FS=5.048;MLEAC=1;MLEAF=0.500;MQ=60.00;MQRankSum=0.000;QD=20.75;ReadPosRankSum=0.794;SOR=0.976	GT:AD:DP:GQ:PL	0/1:88,107:195:99:4053,0,3202	4	5.52679	4.58011	0.198542	3.35329	3.35545	0.333424
d225006	Ib	Pex19	FBgn0032407	1	2L:12094088	0.539604	2L	12094088	C	T	CT	FALSE	202	2996.6	AC=1;AF=0.500;AN=2;BaseQRankSum=-7.702;DP=202;ExcessHet=3.0103;FS=0.000;MLEAC=1;MLEAF=0.500;MQ=60.00;MQRankSum=0.000;QD=14.83;ReadPosRankSum=0.004;SOR=0.702	GT:AD:DP:GQ:PL	0/1:93,109:202:99:3004,0,2673	4	5.52679	4.58011	0.198542	3.35329	3.35545	0.333424
d225006	Ib	Pex19	FBgn0032407	1	2L:12094556	0.64977	2L	12094556	G	A	GA	FALSE	217	4155.6	AC=1;AF=0.500;AN=2;BaseQRankSum=-6.507;DP=217;ExcessHet=3.0103;FS=4.155;MLEAC=1;MLEAF=0.500;MQ=60.00;MQRankSum=0.000;QD=19.15;ReadPosRankSum=-1.304;SOR=0.983	GT:AD:DP:GQ:PL	0/1:76,141:217:99:4163,0,2014	4	5.52679	4.58011	0.198542	3.35329	3.35545	0.333424
d225006	Ib	Pex19	FBgn0032407	1	2L:12094626	0.647799	2L	12094626	T	C	TC	FALSE	160	3306.6	AC=1;AF=0.500;AN=2;BaseQRankSum=7.997;DP=160;ExcessHet=3.0103;FS=1.308;MLEAC=1;MLEAF=0.500;MQ=60.00;MQRankSum=0.000;QD=20.80;ReadPosRankSum=0.764;SOR=0.586	GT:AD:DP:GQ:PL	0/1:56,103:159:99:3314,0,1325	4	5.52679	4.58011	0.198542	3.35329	3.35545	0.333424
d225006	Ib	Ced-12	FBgn0032409	1	2L:12100412	0.230769	2L	12100412	G	A	GA	FALSE	13	60.6	AC=1;AF=0.500;AN=2;BaseQRankSum=-0.526;DP=13;ExcessHet=3.0103;FS=2.920;MLEAC=1;MLEAF=0.500;MQ=60.00;MQRankSum=0.000;QD=4.66;ReadPosRankSum=1.445;SOR=0.916	GT:AD:DP:GQ:PL	0/1:10,3:13:68:68,0,306	4	1.13941	1.15421	0.868783	0.8923	0.681104	0.333424
d225006	Ib	Ced-12	FBgn0032409	1	2L:12100451	0.230769	2L	12100451	C	T	CT	FALSE	14	45.6	AC=1;AF=0.500;AN=2;BaseQRankSum=-1.516;DP=14;ExcessHet=3.0103;FS=2.774;MLEAC=1;MLEAF=0.500;MQ=60.00;MQRankSum=0.000;QD=3.51;ReadPosRankSum=-1.619;SOR=1.609	GT:AD:DP:GQ:PL	0/1:10,3:13:53:53,0,319	4	1.13941	1.15421	0.868783	0.8923	0.681104	0.333424
d225006	Ib	Ced-12	FBgn0032409	1	2L:12100569	0.307692	2L	12100569	T	A	TA	FALSE	26	204.6	AC=1;AF=0.500;AN=2;BaseQRankSum=-0.217;DP=26;ExcessHet=3.0103;FS=1.657;MLEAC=1;MLEAF=0.500;MQ=60.00;MQRankSum=0.000;QD=7.87;ReadPosRankSum=0.000;SOR=0.368	GT:AD:DP:GQ:PL	0/1:18,8:26:99:212,0,576	4	1.13941	1.15421	0.868783	0.8923	0.681104	0.333424
d225006	Ib	Ced-12	FBgn0032409	1	2L:12100645	0.305556	2L	12100645	G	T	GT	FALSE	36	273.6	AC=1;AF=0.500;AN=2;BaseQRankSum=-3.968;DP=36;ExcessHet=3.0103;FS=1.438;MLEAC=1;MLEAF=0.500;MQ=60.00;MQRankSum=0.000;QD=7.60;ReadPosRankSum=1.559;SOR=1.165	GT:AD:DP:GQ:PL	0/1:25,11:36:99:281,0,841	4	1.13941	1.15421	0.868783	0.8923	0.681104	0.333424
d225006	Ib	ThrRS	FBgn0027081	1	2L:12105272	0.444444	2L	12105272	C	T	CT	FALSE	45	580.6	AC=1;AF=0.500;AN=2;BaseQRankSum=-1.298;DP=45;ExcessHet=3.0103;FS=4.288;MLEAC=1;MLEAF=0.500;MQ=60.00;MQRankSum=0.000;QD=12.90;ReadPosRankSum=-0.218;SOR=1.003	GT:AD:DP:GQ:PL	0/1:25,20:45:99:588,0,717	4	5.11791	5.14664	0.914631	2.22626	2.05694	0.333424
d225006	Ib	ThrRS	FBgn0027081	1	2L:12105826	0.38	2L	12105826	C	T	CT	FALSE	51	460.6	AC=1;AF=0.500;AN=2;BaseQRankSum=-2.795;DP=51;ExcessHet=3.0103;FS=1.117;MLEAC=1;MLEAF=0.500;MQ=60.00;MQRankSum=0.000;QD=9.21;ReadPosRankSum=0.766;SOR=0.946	GT:AD:DP:GQ:PL	0/1:31,19:50:99:468,0,927	4	5.11791	5.14664	0.914631	2.22626	2.05694	0.333424
d225006	Ib	ThrRS	FBgn0027081	1	2L:12106057	0.410256	2L	12106057	T	C	TC	FALSE	78	928.6	AC=1;AF=0.500;AN=2;BaseQRankSum=5.527;DP=78;ExcessHet=3.0103;FS=3.142;MLEAC=1;MLEAF=0.500;MQ=60.00;MQRankSum=0.000;QD=11.91;ReadPosRankSum=2.168;SOR=1.110	GT:AD:DP:GQ:PL	0/1:46,32:78:99:936,0,1237	4	5.11791	5.14664	0.914631	2.22626	2.05694	0.333424
d225006	Ib	ThrRS	FBgn0027081	1	2L:12106174	0.74359	2L	12106174	T	C	TC	FALSE	78	1782.6	AC=1;AF=0.500;AN=2;BaseQRankSum=4.204;DP=78;ExcessHet=3.0103;FS=3.655;MLEAC=1;MLEAF=0.500;MQ=60.00;MQRankSum=0.000;QD=22.85;ReadPosRankSum=0.327;SOR=1.222	GT:AD:DP:GQ:PL	0/1:20,58:78:99:1790,0,410	4	5.11791	5.14664	0.914631	2.22626	2.05694	0.333424
d225006	Ib	ThrRS	FBgn0027081	1	2L:12106306	0.779661	2L	12106306	T	C	TC	FALSE	118	2892.6	AC=1;AF=0.500;AN=2;BaseQRankSum=4.387;DP=118;ExcessHet=3.0103;FS=0.000;MLEAC=1;MLEAF=0.500;MQ=60.00;MQRankSum=0.000;QD=24.51;ReadPosRankSum=-1.355;SOR=0.784	GT:AD:DP:GQ:PL	0/1:26,92:118:99:2900,0,455	4	5.11791	5.14664	0.914631	2.22626	2.05694	0.333424
d225006	Ib	ThrRS	FBgn0027081	1	2L:12106330	0.717172	2L	12106330	C	T	CT	FALSE	99	2020.6	AC=1;AF=0.500;AN=2;BaseQRankSum=-5.612;DP=99;ExcessHet=3.0103;FS=1.825;MLEAC=1;MLEAF=0.500;MQ=60.00;MQRankSum=0.000;QD=20.41;ReadPosRankSum=1.146;SOR=0.481	GT:AD:DP:GQ:PL	0/1:28,71:99:99:2028,0,730	4	5.11791	5.14664	0.914631	2.22626	2.05694	0.333424
d225006	Ib	SC35	FBgn0265298	-1	2L:12432324	0.60221	2L	12432324	A	G	TC	FALSE	181	4325.6	AC=1;AF=0.500;AN=2;BaseQRankSum=5.638;DP=181;ExcessHet=3.0103;FS=7.868;MLEAC=1;MLEAF=0.500;MQ=60.00;MQRankSum=0.000;QD=23.90;ReadPosRankSum=0.707;SOR=1.263	GT:AD:DP:GQ:PL	0/1:72,109:181:99:4333,0,2673	4	4.9017	4.50666	0.773754	2.86801	3.138	0.333424
d225006	Ib	SC35	FBgn0265298	-1	2L:12432325	0.605714	2L	12432325	A	T	TA	FALSE	175	4325.6	AC=1;AF=0.500;AN=2;BaseQRankSum=-5.472;DP=175;ExcessHet=3.0103;FS=9.236;MLEAC=1;MLEAF=0.500;MQ=60.00;MQRankSum=0.000;QD=24.72;ReadPosRankSum=0.707;SOR=1.293	GT:AD:DP:GQ:PL	0/1:69,106:175:99:4333,0,2673	4	4.9017	4.50666	0.773754	2.86801	3.138	0.333424
d225006	Ib	eRF3	FBgn0020443	1	2L:12440848	1	2L	12440848	T	C	TC	FALSE	12	504.02	AC=2;AF=1.00;AN=2;DP=12;ExcessHet=3.0103;FS=0.000;MLEAC=2;MLEAF=1.00;MQ=60.00;QD=28.49;SOR=0.693	GT:AD:DP:GQ:PL	1/1:0,12:12:36:518,36,0	4	3.28022	3.17074	0.919731	1.65428	1.51306	0.333424
d225006	Ib	eRF3	FBgn0020443	1	2L:12440870	1	2L	12440870	C	A	CA	FALSE	11	511.02	AC=2;AF=1.00;AN=2;DP=11;ExcessHet=3.0103;FS=0.000;MLEAC=2;MLEAF=1.00;MQ=60.00;QD=29.41;SOR=1.270	GT:AD:DP:GQ:PL	1/1:0,11:11:36:525,36,0	4	3.28022	3.17074	0.919731	1.65428	1.51306	0.333424
d225006	Ib	eRF3	FBgn0020443	1	2L:12440875	1	2L	12440875	C	T	CT	FALSE	12	511.02	AC=2;AF=1.00;AN=2;DP=12;ExcessHet=3.0103;FS=0.000;MLEAC=2;MLEAF=1.00;MQ=60.00;QD=34.15;SOR=1.445	GT:AD:DP:GQ:PL	1/1:0,12:12:36:525,36,0	4	3.28022	3.17074	0.919731	1.65428	1.51306	0.333424
d225006	Ib	bun	FBgn0259176	-1	2L:12456418	0.627907	2L	12456418	C	T	GA	FALSE	43	626.6	AC=1;AF=0.500;AN=2;BaseQRankSum=-4.969;DP=43;ExcessHet=3.0103;FS=2.661;MLEAC=1;MLEAF=0.500;MQ=60.00;MQRankSum=0.000;QD=14.57;ReadPosRankSum=-0.906;SOR=0.382	GT:AD:DP:GQ:PL	0/1:16,27:43:99:634,0,515	4	6.94439	6.97053	0.809548	5.18377	5.42671	0.333424
d225006	Ib	kuz	FBgn0259984	1	2L:13637999	0.6	2L	13637999	G	C	GC	FALSE	35	638.6	AC=1;AF=0.500;AN=2;BaseQRankSum=-0.654;DP=35;ExcessHet=3.0103;FS=3.658;MLEAC=1;MLEAF=0.500;MQ=60.00;MQRankSum=0.000;QD=18.25;ReadPosRankSum=2.804;SOR=0.245	GT:AD:DP:GQ:PL	0/1:14,21:35:99:646,0,387	4	2.63811	3.81166	0.0321821	1.00466	0.883209	0.333424
d225006	Ib	EndoGI	FBgn0028515	1	2L:16259024	0.353448	2L	16259024	A	T	AT	FALSE	116	968.6	AC=1;AF=0.500;AN=2;BaseQRankSum=-5.736;DP=116;ExcessHet=3.0103;FS=46.262;MLEAC=1;MLEAF=0.500;MQ=60.00;MQRankSum=0.000;QD=8.35;ReadPosRankSum=-4.415;SOR=4.404	GT:AD:DP:GQ:PL	0/1:75,41:116:99:976,0,2144	4	3.83455	3.62902	0.689888	4.47696	4.36368	0.333424
d225006	Ib	Syx5	FBgn0011708	1	2L:16308307	0.972222	2L	16308307	A	C	AC	FALSE	36	1183.03	AC=2;AF=1.00;AN=2;BaseQRankSum=1.409;DP=36;ExcessHet=3.0103;FS=0.000;MLEAC=2;MLEAF=1.00;MQ=60.00;MQRankSum=0.000;QD=32.86;ReadPosRankSum=0.629;SOR=0.430	GT:AD:DP:GQ:PL	1/1:1,35:36:75:1197,75,0	4	2.70598	3.01385	0.697866	2.46091	2.19561	0.333424
d225006	Ib	VhaSFD	FBgn0027779	-1	2L:16723635	0.470588	2L	16723635	G	A	CT	FALSE	34	426.6	AC=1;AF=0.500;AN=2;BaseQRankSum=-1.314;DP=34;ExcessHet=3.0103;FS=10.991;MLEAC=1;MLEAF=0.500;MQ=60.00;MQRankSum=0.000;QD=12.55;ReadPosRankSum=0.017;SOR=2.584	GT:AD:DP:GQ:PL	0/1:18,16:34:99:434,0,539	4	5.66391	5.20374	0.436634	3.41702	3.56526	0.333424
d225006	Ib	VhaSFD	FBgn0027779	-1	2L:16724477	0.526316	2L	16724477	A	G	TC	FALSE	57	898.6	AC=1;AF=0.500;AN=2;BaseQRankSum=3.870;DP=57;ExcessHet=3.0103;FS=3.654;MLEAC=1;MLEAF=0.500;MQ=60.00;MQRankSum=0.000;QD=15.76;ReadPosRankSum=0.297;SOR=1.101	GT:AD:DP:GQ:PL	0/1:27,30:57:99:906,0,782	4	5.66391	5.20374	0.436634	3.41702	3.56526	0.333424
d225006	Ib	cpb	FBgn0011570	1	2L:1705037	0.552632	2L	1705037	C	T	CT	FALSE	76	1158.6	AC=1;AF=0.500;AN=2;BaseQRankSum=-3.044;DP=76;ExcessHet=3.0103;FS=4.971;MLEAC=1;MLEAF=0.500;MQ=60.00;MQRankSum=0.000;QD=15.24;ReadPosRankSum=-0.577;SOR=0.293	GT:AD:DP:GQ:PL	0/1:34,42:76:99:1166,0,956	4	3.85581	4.22635	0.953641	3.46312	3.30249	0.333424
d225006	Ib	cpb	FBgn0011570	1	2L:1705436	0.459016	2L	1705436	C	A	CA	FALSE	61	719.6	AC=1;AF=0.500;AN=2;BaseQRankSum=-1.614;DP=61;ExcessHet=3.0103;FS=6.892;MLEAC=1;MLEAF=0.500;MQ=60.00;MQRankSum=0.000;QD=11.80;ReadPosRankSum=0.714;SOR=0.241	GT:AD:DP:GQ:PL	0/1:33,28:61:99:727,0,888	4	3.85581	4.22635	0.953641	3.46312	3.30249	0.333424
d225006	Ib	cpb	FBgn0011570	1	2L:1705978	0.468354	2L	1705978	C	A	CA	FALSE	79	896.6	AC=1;AF=0.500;AN=2;BaseQRankSum=-4.713;DP=79;ExcessHet=3.0103;FS=0.000;MLEAC=1;MLEAF=0.500;MQ=60.00;MQRankSum=0.000;QD=11.35;ReadPosRankSum=0.482;SOR=0.608	GT:AD:DP:GQ:PL	0/1:42,37:79:99:904,0,1279	4	3.85581	4.22635	0.953641	3.46312	3.30249	0.333424
d225006	Ib	RpS26	FBgn0261597	-1	2L:18442538	0.349398	2L	18442538	C	A	GT	FALSE	332	2603.6	AC=1;AF=0.500;AN=2;BaseQRankSum=-11.692;DP=332;ExcessHet=3.0103;FS=1.438;MLEAC=1;MLEAF=0.500;MQ=60.00;MQRankSum=0.000;QD=7.84;ReadPosRankSum=-3.161;SOR=0.962	GT:AD:DP:GQ:PL	0/1:216,116:332:99:2611,0,7232	4	12.2899	12.334	0.846576	12.1406	11.9459	0.333424
d225006	Ib	ncm	FBgn0086707	-1	2L:18445794	0.814286	2L	18445794	C	T	GA	FALSE	70	1642.6	AC=1;AF=0.500;AN=2;BaseQRankSum=-3.655;DP=70;ExcessHet=3.0103;FS=3.420;MLEAC=1;MLEAF=0.500;MQ=60.00;MQRankSum=0.000;QD=23.47;ReadPosRankSum=0.311;SOR=1.576	GT:AD:DP:GQ:PL	0/1:13,57:70:99:1650,0,277	4	2.07645	2.29727	0.913409	1.21747	0.89689	0.333424
d225006	Ib	ncm	FBgn0086707	-1	2L:18445836	0.76	2L	18445836	A	G	TC	FALSE	50	1190.6	AC=1;AF=0.500;AN=2;BaseQRankSum=3.657;DP=50;ExcessHet=3.0103;FS=7.690;MLEAC=1;MLEAF=0.500;MQ=60.00;MQRankSum=0.000;QD=23.81;ReadPosRankSum=-0.160;SOR=0.128	GT:AD:DP:GQ:PL	0/1:12,38:50:99:1198,0,237	4	2.07645	2.29727	0.913409	1.21747	0.89689	0.333424
d225006	Ib	ref(2)P	FBgn0003231	1	2L:19545431	0.513514	2L	19545431	C	A	CA	FALSE	74	1112.6	AC=1;AF=0.500;AN=2;BaseQRankSum=-3.100;DP=74;ExcessHet=3.0103;FS=0.000;MLEAC=1;MLEAF=0.500;MQ=60.00;MQRankSum=0.000;QD=15.04;ReadPosRankSum=1.246;SOR=0.756	GT:AD:DP:GQ:PL	0/1:36,38:74:99:1120,0,1137	4	4.50617	5.57657	0.054498	3.77421	3.62158	0.333424
d225006	Ib	COX4	FBgn0032833	1	2L:19959779	0.452991	2L	19959779	T	C	TC	FALSE	1054	14593.6	AC=1;AF=0.500;AN=2;BaseQRankSum=21.191;DP=1054;ExcessHet=3.0103;FS=0.000;MLEAC=1;MLEAF=0.500;MQ=60.00;MQRankSum=0.000;QD=13.86;ReadPosRankSum=-0.024;SOR=0.698	GT:AD:DP:GQ:PL	0/1:576,477:1053:99:14601,0,15941	4	9.81625	9.53537	0.832239	8.74932	8.98623	0.333424
d225006	Ib	Arpc2	FBgn0032859	1	2L:20420784	0.494624	2L	20420784	C	T	CT	FALSE	93	895.6	AC=1;AF=0.500;AN=2;BaseQRankSum=-5.868;DP=93;ExcessHet=3.0103;FS=4.049;MLEAC=1;MLEAF=0.500;MQ=60.00;MQRankSum=0.000;QD=9.63;ReadPosRankSum=-3.426;SOR=0.379	GT:AD:DP:GQ:PL	0/1:47,46:93:99:903,0,1378	4	3.9046	4.07069	0.991144	2.77238	2.56212	0.333424
d225006	Ib	twit	FBgn0032895	1	2L:20856280	0.448905	2L	20856280	A	T	AT	FALSE	275	2862.6	AC=1;AF=0.500;AN=2;BaseQRankSum=-2.088;DP=275;ExcessHet=3.0103;FS=2.031;MLEAC=1;MLEAF=0.500;MQ=60.00;MQRankSum=0.000;QD=10.45;ReadPosRankSum=-0.372;SOR=0.847	GT:AD:DP:GQ:PL	0/1:151,123:274:99:2870,0,4089	4	8.61265	7.85783	0.400253	0.434844	0.167292	0.333424
d225006	Ib	twit	FBgn0032895	1	2L:20856551	0.394737	2L	20856551	C	T	CT	FALSE	304	2867.6	AC=1;AF=0.500;AN=2;BaseQRankSum=-9.640;DP=304;ExcessHet=3.0103;FS=5.411;MLEAC=1;MLEAF=0.500;MQ=60.00;MQRankSum=0.000;QD=9.43;ReadPosRankSum=-0.652;SOR=0.998	GT:AD:DP:GQ:PL	0/1:184,120:304:99:2875,0,5799	4	8.61265	7.85783	0.400253	0.434844	0.167292	0.333424
d225006	Ib	sky	FBgn0032901	-1	2L:20871728	0.424837	2L	20871728	T	A	AT	FALSE	153	1626.6	AC=1;AF=0.500;AN=2;BaseQRankSum=-1.102;DP=153;ExcessHet=3.0103;FS=2.936;MLEAC=1;MLEAF=0.500;MQ=60.00;MQRankSum=0.000;QD=10.63;ReadPosRankSum=-1.629;SOR=0.470	GT:AD:DP:GQ:PL	0/1:88,65:153:99:1634,0,2430	4	3.78581	3.16199	0.438386	3.11508	3.02574	0.333424
d225006	Ib	Snx21	FBgn0031457	-1	2L:2764378	0.366667	2L	2764378	G	A	CT	FALSE	30	397.6	AC=1;AF=0.500;AN=2;BaseQRankSum=2.398;DP=30;ExcessHet=3.0103;FS=28.070;MLEAC=1;MLEAF=0.500;MQ=60.00;MQRankSum=0.000;QD=13.25;ReadPosRankSum=-4.447;SOR=4.974	GT:AD:DP:GQ:PL	0/1:19,11:30:99:405,0,748	4	3.71689	5.92923	0.00165457	2.46603	2.37167	0.333424
d225006	Ib	gkt	FBgn0260817	1	2L:3160233	1	2L	3160233	C	G	CG	FALSE	12	375.02	AC=2;AF=1.00;AN=2;DP=12;ExcessHet=3.0103;FS=0.000;MLEAC=2;MLEAF=1.00;MQ=60.00;QD=31.25;SOR=1.445	GT:AD:DP:GQ:PL	1/1:0,12:12:36:389,36,0	4	1.75442	2.16285	0.634118	0.39653	0.732201	0.333424
d225006	Ib	CG9662	FBgn0031529	-1	2L:3376197	0.827586	2L	3376197	G	A	CT	FALSE	58	1437.6	AC=1;AF=0.500;AN=2;BaseQRankSum=-3.042;DP=58;ExcessHet=3.0103;FS=3.015;MLEAC=1;MLEAF=0.500;MQ=60.00;MQRankSum=0.000;QD=24.79;ReadPosRankSum=-0.577;SOR=0.340	GT:AD:DP:GQ:PL	0/1:10,48:58:99:1445,0,187	4	4.79971	4.26303	0.58721	2.25071	2.37554	0.333424
d225006	Ib	CG9662	FBgn0031529	-1	2L:3376230	0.875	2L	3376230	C	G	GC	FALSE	48	1593.6	AC=1;AF=0.500;AN=2;BaseQRankSum=-0.560;DP=48;ExcessHet=3.0103;FS=1.752;MLEAC=1;MLEAF=0.500;MQ=60.00;MQRankSum=0.000;QD=33.20;ReadPosRankSum=1.877;SOR=0.307	GT:AD:DP:GQ:PL	0/1:6,42:48:99:1601,0,115	4	4.79971	4.26303	0.58721	2.25071	2.37554	0.333424
d225006	Ib	CG9662	FBgn0031529	-1	2L:3376254	0.864407	2L	3376254	A	G	TC	FALSE	59	1910.6	AC=1;AF=0.500;AN=2;BaseQRankSum=3.355;DP=59;ExcessHet=3.0103;FS=3.499;MLEAC=1;MLEAF=0.500;MQ=60.00;MQRankSum=0.000;QD=32.38;ReadPosRankSum=-0.766;SOR=0.238	GT:AD:DP:GQ:PL	0/1:8,51:59:99:1918,0,150	4	4.79971	4.26303	0.58721	2.25071	2.37554	0.333424
d225006	Ib	Snx1	FBgn0031534	1	2L:3451631	0.34375	2L	3451631	T	A	TA	FALSE	32	433.6	AC=1;AF=0.500;AN=2;BaseQRankSum=0.430;DP=32;ExcessHet=3.0103;FS=0.000;MLEAC=1;MLEAF=0.500;MQ=60.00;MQRankSum=0.000;QD=13.55;ReadPosRankSum=0.906;SOR=0.591	GT:AD:DP:GQ:PL	0/1:21,11:32:99:441,0,846	4	1.59001	2.6723	0.203485	1.66581	1.77491	0.333424
d225006	Ib	Snx1	FBgn0031534	1	2L:3451632	0.363636	2L	3451632	T	G	TG	FALSE	33	433.6	AC=1;AF=0.500;AN=2;BaseQRankSum=1.920;DP=33;ExcessHet=3.0103;FS=1.363;MLEAC=1;MLEAF=0.500;MQ=60.00;MQRankSum=0.000;QD=13.14;ReadPosRankSum=0.683;SOR=0.465	GT:AD:DP:GQ:PL	0/1:21,12:33:99:441,0,846	4	1.59001	2.6723	0.203485	1.66581	1.77491	0.333424
d225006	Ib	Snx1	FBgn0031534	1	2L:3451743	0.458333	2L	3451743	C	A	CA	FALSE	24	317.6	AC=1;AF=0.500;AN=2;BaseQRankSum=-3.695;DP=24;ExcessHet=3.0103;FS=2.246;MLEAC=1;MLEAF=0.500;MQ=60.00;MQRankSum=0.000;QD=13.23;ReadPosRankSum=1.865;SOR=1.609	GT:AD:DP:GQ:PL	0/1:13,11:24:99:325,0,449	4	1.59001	2.6723	0.203485	1.66581	1.77491	0.333424
d225006	Ib	Snx1	FBgn0031534	1	2L:3451853	0.355556	2L	3451853	G	A	GA	FALSE	45	317.6	AC=1;AF=0.500;AN=2;BaseQRankSum=-2.422;DP=45;ExcessHet=3.0103;FS=1.271;MLEAC=1;MLEAF=0.500;MQ=60.00;MQRankSum=0.000;QD=7.06;ReadPosRankSum=-0.322;SOR=0.445	GT:AD:DP:GQ:PL	0/1:29,16:45:99:325,0,832	4	1.59001	2.6723	0.203485	1.66581	1.77491	0.333424
d225006	Ib	Snx1	FBgn0031534	1	2L:3451877	0.352941	2L	3451877	T	G	TG	FALSE	34	242.6	AC=1;AF=0.500;AN=2;BaseQRankSum=-0.580;DP=34;ExcessHet=3.0103;FS=0.000;MLEAC=1;MLEAF=0.500;MQ=60.00;MQRankSum=0.000;QD=7.14;ReadPosRankSum=0.348;SOR=0.527	GT:AD:DP:GQ:PL	0/1:22,12:34:99:250,0,668	4	1.59001	2.6723	0.203485	1.66581	1.77491	0.333424
d225006	Ib	Thor	FBgn0261560	1	2L:3479300	0.532819	2L	3479300	C	A	CA	FALSE	1037	15195.6	AC=1;AF=0.500;AN=2;BaseQRankSum=-16.496;DP=1037;ExcessHet=3.0103;FS=0.522;MLEAC=1;MLEAF=0.500;MQ=60.00;MQRankSum=0.000;QD=14.67;ReadPosRankSum=1.268;SOR=0.637	GT:AD:DP:GQ:PL	0/1:484,552:1036:99:15203,0,14249	4	4.02038	3.58018	0.652908	11.318	10.933	0.333424
d225006	Ib	CG17593	FBgn0031544	1	2L:3516924	0.34375	2L	3516924	G	A	GA	FALSE	64	533.6	AC=1;AF=0.500;AN=2;BaseQRankSum=-3.081;DP=64;ExcessHet=3.0103;FS=17.866;MLEAC=1;MLEAF=0.500;MQ=60.00;MQRankSum=0.000;QD=8.34;ReadPosRankSum=0.967;SOR=2.259	GT:AD:DP:GQ:PL	0/1:42,22:64:99:541,0,1327	4	3.01456	2.37419	0.440131	1.92392	1.63878	0.333424
d225006	Ib	Reph	FBgn0021800	1	2L:3810139	1	2L	3810139	T	C	TC	FALSE	17	641.03	AC=2;AF=1.00;AN=2;DP=17;ExcessHet=3.0103;FS=0.000;MLEAC=2;MLEAF=1.00;MQ=60.00;QD=29.69;SOR=1.739	GT:AD:DP:GQ:PL	1/1:0,17:17:51:655,51,0	4	4.11897	3.11712	0.00739119	1.28769	0.784477	0.333424
d225006	Ib	RpLP1	FBgn0002593	1	2L:419957	0.155556	2L	419957	C	T	CT	FALSE	48	68.6	AC=1;AF=0.500;AN=2;BaseQRankSum=-2.471;DP=48;ExcessHet=3.0103;FS=4.042;MLEAC=1;MLEAF=0.500;MQ=60.00;MQRankSum=0.000;QD=1.52;ReadPosRankSum=-2.737;SOR=0.203	GT:AD:DP:GQ:PL	0/1:38,7:45:76:76,0,1360	4	12.3717	12.4148	0.881502	12.3429	12.0825	0.333424
d225006	Ib	CG3702	FBgn0031590	-1	2L:4224992	0.357143	2L	4224992	C	T	GA	FALSE	14	116.6	AC=1;AF=0.500;AN=2;BaseQRankSum=-0.720;DP=14;ExcessHet=3.0103;FS=0.000;MLEAC=1;MLEAF=0.500;MQ=60.00;MQRankSum=0.000;QD=8.33;ReadPosRankSum=-1.685;SOR=0.804	GT:AD:DP:GQ:PL	0/1:9,5:14:99:124,0,276	4	2.65173	2.86415	0.942284	2.07609	2.03603	0.333424
d225006	Ib	RpL40	FBgn0003941	1	2L:4228231	0.51955	2L	4228231	G	A	GA	FALSE	1688	24118.6	AC=1;AF=0.500;AN=2;BaseQRankSum=-22.668;DP=1688;ExcessHet=3.0103;FS=0.517;MLEAC=1;MLEAF=0.500;MQ=60.00;MQRankSum=0.000;QD=14.29;ReadPosRankSum=-2.113;SOR=0.667	GT:AD:DP:GQ:PL	0/1:811,877:1688:99:24126,0,24286	4	12.1664	12.1374	0.69258	11.4574	11.4142	0.333424
d225006	Ib	mRpL28	FBgn0031660	1	2L:4974809	0.37	2L	4974809	C	T	CT	FALSE	100	882.6	AC=1;AF=0.500;AN=2;BaseQRankSum=-2.845;DP=100;ExcessHet=3.0103;FS=5.148;MLEAC=1;MLEAF=0.500;MQ=60.00;MQRankSum=0.000;QD=8.83;ReadPosRankSum=-0.572;SOR=0.659	GT:AD:DP:GQ:PL	0/1:63,37:100:99:890,0,1958	4	3.66831	3.29714	0.923105	3.73488	3.71203	0.333424
d225006	Ib	CG3792	FBgn0031662	1	2L:4978071	0.586207	2L	4978071	G	A	GA	FALSE	58	984.6	AC=1;AF=0.500;AN=2;BaseQRankSum=-4.970;DP=58;ExcessHet=3.0103;FS=1.019;MLEAC=1;MLEAF=0.500;MQ=60.00;MQRankSum=0.000;QD=16.98;ReadPosRankSum=1.036;SOR=0.514	GT:AD:DP:GQ:PL	0/1:24,34:58:99:992,0,745	4	3.23458	2.84318	0.597116	2.52776	2.67162	0.333424
d225006	Ib	Rtnl1	FBgn0053113	-1	2L:5008290	0.818182	2L	5008290	G	T	CA	FALSE	22	519.6	AC=1;AF=0.500;AN=2;BaseQRankSum=-3.296;DP=22;ExcessHet=3.0103;FS=0.000;MLEAC=1;MLEAF=0.500;MQ=60.00;MQRankSum=0.000;QD=23.62;ReadPosRankSum=0.433;SOR=0.446	GT:AD:DP:GQ:PL	0/1:4,18:22:84:527,0,84	4	8.65754	8.22041	0.738348	6.20784	5.95089	0.333424
d225006	Ib	Rtnl1	FBgn0053113	-1	2L:5009310	0.560976	2L	5009310	C	T	GA	FALSE	41	794.6	AC=1;AF=0.500;AN=2;BaseQRankSum=-0.997;DP=41;ExcessHet=3.0103;FS=1.216;MLEAC=1;MLEAF=0.500;MQ=60.00;MQRankSum=0.000;QD=19.38;ReadPosRankSum=0.224;SOR=0.611	GT:AD:DP:GQ:PL	0/1:18,23:41:99:802,0,710	4	8.65754	8.22041	0.738348	6.20784	5.95089	0.333424
d225006	Ib	SelT	FBgn0031670	1	2L:5011196	0.632653	2L	5011196	A	C	AC	FALSE	147	3046.6	AC=1;AF=0.500;AN=2;BaseQRankSum=5.010;DP=147;ExcessHet=3.0103;FS=5.154;MLEAC=1;MLEAF=0.500;MQ=60.00;MQRankSum=0.000;QD=20.73;ReadPosRankSum=0.431;SOR=1.119	GT:AD:DP:GQ:PL	0/1:54,93:147:99:3054,0,1395	4	6.33383	6.84417	0.699678	5.28965	5.24848	0.333424
d225006	Ib	CG31650	FBgn0031673	-1	2L:5040833	0.727273	2L	5040833	C	A	GT	FALSE	22	450.6	AC=1;AF=0.500;AN=2;BaseQRankSum=-2.200;DP=22;ExcessHet=3.0103;FS=0.000;MLEAC=1;MLEAF=0.500;MQ=60.00;MQRankSum=0.000;QD=20.48;ReadPosRankSum=0.037;SOR=0.693	GT:AD:DP:GQ:PL	0/1:6,16:22:99:458,0,132	4	4.95708	5.02313	0.952346	2.11362	1.73761	0.333424
d225006	Ib	CG14024	FBgn0031697	-1	2L:5312887	0.76	2L	5312887	G	T	CA	FALSE	25	580.6	AC=1;AF=0.500;AN=2;BaseQRankSum=-2.986;DP=25;ExcessHet=3.0103;FS=0.000;MLEAC=1;MLEAF=0.500;MQ=60.00;MQRankSum=0.000;QD=23.22;ReadPosRankSum=-0.160;SOR=0.793	GT:AD:DP:GQ:PL	0/1:6,19:25:99:588,0,160	4	4.1084	4.81184	0.222063	0.0890449	0.126785	0.333424
d225006	Ib	Nhe3	FBgn0028703	-1	2L:6677991	0.8	2L	6677991	A	G	TC	FALSE	15	341.6	AC=1;AF=0.500;AN=2;BaseQRankSum=1.400;DP=15;ExcessHet=3.0103;FS=4.301;MLEAC=1;MLEAF=0.500;MQ=60.00;MQRankSum=0.000;QD=22.77;ReadPosRankSum=-1.142;SOR=2.833	GT:AD:DP:GQ:PL	0/1:3,12:15:39:349,0,39	4	3.56007	3.997	0.544983	0.937678	1.02396	0.333424
d225006	Ib	Nhe3	FBgn0028703	-1	2L:6678070	1	2L	6678070	G	A	CT	FALSE	12	406.02	AC=2;AF=1.00;AN=2;DP=12;ExcessHet=3.0103;FS=0.000;MLEAC=2;MLEAF=1.00;MQ=60.00;QD=33.84;SOR=1.022	GT:AD:DP:GQ:PL	1/1:0,12:12:36:420,36,0	4	3.56007	3.997	0.544983	0.937678	1.02396	0.333424
d225006	Ib	nrv2	FBgn0015777	-1	2L:6790466	0.444444	2L	6790466	A	G	TC	FALSE	27	363.6	AC=1;AF=0.500;AN=2;BaseQRankSum=3.662;DP=27;ExcessHet=3.0103;FS=0.000;MLEAC=1;MLEAF=0.500;MQ=60.00;MQRankSum=0.000;QD=13.47;ReadPosRankSum=0.392;SOR=0.951	GT:AD:DP:GQ:PL	0/1:15,12:27:99:371,0,439	4	3.48474	2.11119	0.017969	1.38147	1.80436	0.333424
d225006	Ib	muc	FBgn0283658	1	2L:7429839	0.284916	2L	7429839	C	G	CG	FALSE	179	1476.6	AC=1;AF=0.500;AN=2;BaseQRankSum=3.866;DP=179;ExcessHet=3.0103;FS=68.820;MLEAC=1;MLEAF=0.500;MQ=60.00;MQRankSum=0.000;QD=8.25;ReadPosRankSum=-9.311;SOR=4.352	GT:AD:DP:GQ:PL	0/1:128,51:179:99:1484,0,4055	4	4.74482	3.37582	0.364846	4.13376	4.20774	0.333424
d225006	Ib	Rack1	FBgn0020618	-1	2L:7825630	0.234694	2L	7825630	A	G	TC	FALSE	99	474.6	AC=1;AF=0.500;AN=2;BaseQRankSum=4.541;DP=99;ExcessHet=3.0103;FS=0.000;MLEAC=1;MLEAF=0.500;MQ=60.00;MQRankSum=0.000;QD=4.84;ReadPosRankSum=-4.733;SOR=0.544	GT:AD:DP:GQ:PL	0/1:75,23:98:99:482,0,2569	4	11.0143	10.9919	0.822681	10.3093	10.1087	0.333424
d225006	Ib	Bsg	FBgn0261822	1	2L:8083489	0.120482	2L	8083489	G	A	GA	FALSE	89	90.6	AC=1;AF=0.500;AN=2;BaseQRankSum=1.199;DP=89;ExcessHet=3.0103;FS=13.046;MLEAC=1;MLEAF=0.500;MQ=60.00;MQRankSum=0.000;QD=1.09;ReadPosRankSum=-3.755;SOR=0.048	GT:AD:DP:GQ:PL	0/1:73,10:83:98:98,0,2155	4	6.77824	7.06161	0.435236	3.81069	3.56629	0.333424
d225006	Ib	RpS13	FBgn0010265	-1	2L:8363926	0.49073	2L	8363926	C	A	GT	FALSE	1728	23131.6	AC=1;AF=0.500;AN=2;BaseQRankSum=-24.522;DP=1728;ExcessHet=3.0103;FS=0.570;MLEAC=1;MLEAF=0.500;MQ=60.00;MQRankSum=0.000;QD=13.40;ReadPosRankSum=1.199;SOR=0.626	GT:AD:DP:GQ:PL	0/1:879,847:1726:99:23139,0,26918	4	12.5537	12.6411	0.256312	12.0036	11.9644	0.333424
d225006	Ib	CG13384	FBgn0032036	1	2L:8386605	0.227273	2L	8386605	C	T	CT	FALSE	22	72.6	AC=1;AF=0.500;AN=2;BaseQRankSum=-2.003;DP=22;ExcessHet=3.0103;FS=2.154;MLEAC=1;MLEAF=0.500;MQ=60.00;MQRankSum=0.000;QD=3.30;ReadPosRankSum=-0.275;SOR=0.750	GT:AD:DP:GQ:PL	0/1:17,5:22:80:80,0,534	4	2.93885	3.45893	0.519469	1.35427	1.30628	0.333424
d225006	Ib	CG13384	FBgn0032036	1	2L:8386629	0.130435	2L	8386629	A	T	AT	FALSE	23	52.6	AC=1;AF=0.500;AN=2;BaseQRankSum=2.285;DP=23;ExcessHet=3.0103;FS=0.000;MLEAC=1;MLEAF=0.500;MQ=60.00;MQRankSum=0.000;QD=2.29;ReadPosRankSum=0.137;SOR=0.275	GT:AD:DP:GQ:PL	0/1:20,3:23:60:60,0,822	4	2.93885	3.45893	0.519469	1.35427	1.30628	0.333424
d225006	Ib	Akap200	FBgn0027932	1	2L:8430755	0.552448	2L	8430755	C	T	CT	FALSE	143	2229.6	AC=1;AF=0.500;AN=2;BaseQRankSum=0.392;DP=143;ExcessHet=3.0103;FS=7.946;MLEAC=1;MLEAF=0.500;MQ=60.00;MQRankSum=0.000;QD=15.59;ReadPosRankSum=1.305;SOR=1.426	GT:AD:DP:GQ:PL	0/1:64,79:143:99:2237,0,1605	4	7.14929	7.38323	0.779992	2.49923	2.83286	0.333424
d225006	Ib	Gdi	FBgn0004868	-1	2L:9494388	0.45098	2L	9494388	G	A	CT	FALSE	102	1241.6	AC=1;AF=0.500;AN=2;BaseQRankSum=-2.536;DP=102;ExcessHet=3.0103;FS=4.951;MLEAC=1;MLEAF=0.500;MQ=60.00;MQRankSum=0.000;QD=12.17;ReadPosRankSum=-0.715;SOR=0.678	GT:AD:DP:GQ:PL	0/1:56,46:102:99:1249,0,1618	4	8.05437	8.41484	0.842776	4.8483	4.88893	0.333424
d225006	Ib	jp	FBgn0032129	-1	2L:9549109	0.71831	2L	9549109	C	A	GT	FALSE	71	2058.6	AC=1;AF=0.500;AN=2;BaseQRankSum=-5.409;DP=71;ExcessHet=3.0103;FS=11.424;MLEAC=1;MLEAF=0.500;MQ=60.00;MQRankSum=0.000;QD=28.99;ReadPosRankSum=-0.174;SOR=0.090	GT:AD:DP:GQ:PL	0/1:20,51:71:99:2066,0,681	4	1.38812	1.46835	0.906019	4.49803	4.20767	0.333424
d225006	Ib	sel	FBgn0263260	-1	2R:10051845	0.43662	2R	10051845	C	T	GA	FALSE	71	734.6	AC=1;AF=0.500;AN=2;BaseQRankSum=-5.339;DP=71;ExcessHet=3.0103;FS=7.988;MLEAC=1;MLEAF=0.500;MQ=60.00;MQRankSum=0.000;QD=10.35;ReadPosRankSum=-1.598;SOR=0.598	GT:AD:DP:GQ:PL	0/1:40,31:71:99:742,0,1207	4	1.83042	2.02485	0.715167	2.2778	2.06395	0.333424
d225006	Ib	RNaseZ	FBgn0028426	-1	2R:10307378	1	2R	10307378	G	A	CT	FALSE	21	964.03	AC=2;AF=1.00;AN=2;DP=21;ExcessHet=3.0103;FS=0.000;MLEAC=2;MLEAF=1.00;MQ=60.00;QD=32.12;SOR=6.184	GT:AD:DP:GQ:PL	1/1:0,21:21:66:978,66,0	4	0.912224	0.704883	0.672113	0.569709	0.392617	0.333424
d225006	Ib	Galphao	FBgn0001122	1	2R:10462557	1	2R	10462557	G	C	GC	FALSE	18	636.03	AC=2;AF=1.00;AN=2;DP=18;ExcessHet=3.0103;FS=0.000;MLEAC=2;MLEAF=1.00;MQ=60.00;QD=32.80;SOR=2.833	GT:AD:DP:GQ:PL	1/1:0,18:18:54:650,54,0	4	5.27539	5.64569	0.388493	0.648983	0.676221	0.333424
d225006	Ib	Galphao	FBgn0001122	1	2R:10463844	0.552941	2R	10463844	G	A	GA	FALSE	85	1352.6	AC=1;AF=0.500;AN=2;BaseQRankSum=-3.695;DP=85;ExcessHet=3.0103;FS=6.123;MLEAC=1;MLEAF=0.500;MQ=60.00;MQRankSum=0.000;QD=15.91;ReadPosRankSum=-1.462;SOR=0.285	GT:AD:DP:GQ:PL	0/1:38,47:85:99:1360,0,1077	4	5.27539	5.64569	0.388493	0.648983	0.676221	0.333424
d225006	Ib	Pef	FBgn0033529	1	2R:10481675	0.621359	2R	10481675	T	G	TG	FALSE	103	2392.6	AC=1;AF=0.500;AN=2;BaseQRankSum=2.741;DP=103;ExcessHet=3.0103;FS=21.450;MLEAC=1;MLEAF=0.500;MQ=60.00;MQRankSum=0.000;QD=23.23;ReadPosRankSum=-1.992;SOR=0.076	GT:AD:DP:GQ:PL	0/1:39,64:103:99:2400,0,936	4	6.16521	6.2731	0.743747	3.74954	3.7186	0.333424
d225006	Ib	Pef	FBgn0033529	1	2R:10481682	0.524752	2R	10481682	A	T	AT	FALSE	101	1304.6	AC=1;AF=0.500;AN=2;BaseQRankSum=-0.665;DP=101;ExcessHet=3.0103;FS=4.254;MLEAC=1;MLEAF=0.500;MQ=60.00;MQRankSum=0.000;QD=12.92;ReadPosRankSum=-0.590;SOR=0.352	GT:AD:DP:GQ:PL	0/1:48,53:101:99:1312,0,1787	4	6.16521	6.2731	0.743747	3.74954	3.7186	0.333424
d225006	Ib	wde	FBgn0027499	-1	2R:10805304	0.653846	2R	10805304	C	A	GT	FALSE	26	494.6	AC=1;AF=0.500;AN=2;BaseQRankSum=-3.708;DP=26;ExcessHet=3.0103;FS=15.486;MLEAC=1;MLEAF=0.500;MQ=60.00;MQRankSum=0.000;QD=19.02;ReadPosRankSum=-2.432;SOR=3.372	GT:AD:DP:GQ:PL	0/1:9,17:26:99:502,0,275	4	2.05105	2.37689	0.751554	0.762529	0.689263	0.333424
d225006	Ib	wde	FBgn0027499	-1	2R:10805625	0.882353	2R	10805625	C	T	GA	FALSE	34	827.6	AC=1;AF=0.500;AN=2;BaseQRankSum=-3.365;DP=34;ExcessHet=3.0103;FS=0.000;MLEAC=1;MLEAF=0.500;MQ=60.00;MQRankSum=0.000;QD=24.34;ReadPosRankSum=0.053;SOR=0.976	GT:AD:DP:GQ:PL	0/1:4,30:34:56:835,0,56	4	2.05105	2.37689	0.751554	0.762529	0.689263	0.333424
d225006	Ib	CG12935	FBgn0033547	1	2R:10810273	0.695652	2R	10810273	C	A	CA	FALSE	69	1215.6	AC=1;AF=0.500;AN=2;BaseQRankSum=-3.160;DP=69;ExcessHet=3.0103;FS=0.982;MLEAC=1;MLEAF=0.500;MQ=60.00;MQRankSum=0.000;QD=17.62;ReadPosRankSum=-0.095;SOR=0.859	GT:AD:DP:GQ:PL	0/1:21,48:69:99:1223,0,486	4	1.52238	1.28173	0.748525	1.03816	0.429025	0.333424
d225006	Ib	nclb	FBgn0263510	1	2R:10876325	0.83871	2R	10876325	C	T	CT	FALSE	31	781.6	AC=1;AF=0.500;AN=2;BaseQRankSum=-1.913;DP=31;ExcessHet=3.0103;FS=0.000;MLEAC=1;MLEAF=0.500;MQ=60.00;MQRankSum=0.000;QD=25.21;ReadPosRankSum=0.567;SOR=0.693	GT:AD:DP:GQ:PL	0/1:5,26:31:89:789,0,89	4	2.63709	1.58521	0.250542	0.492658	0.759112	0.333424
d225006	Ib	nclb	FBgn0263510	1	2R:10877045	0.808511	2R	10877045	G	C	GC	FALSE	47	1122.6	AC=1;AF=0.500;AN=2;BaseQRankSum=-0.041;DP=47;ExcessHet=3.0103;FS=5.429;MLEAC=1;MLEAF=0.500;MQ=60.00;MQRankSum=0.000;QD=23.89;ReadPosRankSum=-1.344;SOR=0.599	GT:AD:DP:GQ:PL	0/1:9,38:47:99:1130,0,123	4	2.63709	1.58521	0.250542	0.492658	0.759112	0.333424
d225006	Ib	PI31	FBgn0033669	-1	2R:11967614	0.777778	2R	11967614	G	A	CT	FALSE	72	1638.6	AC=1;AF=0.500;AN=2;BaseQRankSum=0.394;DP=72;ExcessHet=3.0103;FS=6.888;MLEAC=1;MLEAF=0.500;MQ=60.00;MQRankSum=0.000;QD=22.76;ReadPosRankSum=0.157;SOR=0.156	GT:AD:DP:GQ:PL	0/1:16,56:72:99:1646,0,315	4	4.23446	5.38382	0.314522	3.64262	3.07008	0.333424
d225006	Ib	PI31	FBgn0033669	-1	2R:11967911	0.681818	2R	11967911	C	T	GA	FALSE	88	1674.6	AC=1;AF=0.500;AN=2;BaseQRankSum=-4.902;DP=88;ExcessHet=3.0103;FS=0.000;MLEAC=1;MLEAF=0.500;MQ=60.00;MQRankSum=0.000;QD=19.03;ReadPosRankSum=-0.789;SOR=0.610	GT:AD:DP:GQ:PL	0/1:28,60:88:99:1682,0,751	4	4.23446	5.38382	0.314522	3.64262	3.07008	0.333424
d225006	Ib	Drep3	FBgn0028407	1	2R:12061699	0.52381	2R	12061699	T	C	TC	FALSE	21	280.6	AC=1;AF=0.500;AN=2;BaseQRankSum=-0.036;DP=21;ExcessHet=3.0103;FS=4.123;MLEAC=1;MLEAF=0.500;MQ=60.00;MQRankSum=0.000;QD=13.36;ReadPosRankSum=0.494;SOR=1.802	GT:AD:DP:GQ:PL	0/1:10,11:21:99:288,0,290	4	3.12174	3.72334	0.5785	0.173035	0.00806535	0.333424
d225006	Ib	CG8888	FBgn0033679	-1	2R:12064749	0.176471	2R	12064749	C	T	GA	FALSE	85	228.6	AC=1;AF=0.500;AN=2;BaseQRankSum=-3.678;DP=85;ExcessHet=3.0103;FS=0.000;MLEAC=1;MLEAF=0.500;MQ=60.00;MQRankSum=0.000;QD=2.69;ReadPosRankSum=-0.722;SOR=0.480	GT:AD:DP:GQ:PL	0/1:70,15:85:99:236,0,2185	4	2.80847	2.95601	0.917446	7.74478	7.48999	0.333424
d225006	Ib	jeb	FBgn0086677	-1	2R:12118474	0.75	2R	12118474	C	A	GT	FALSE	12	257.6	AC=1;AF=0.500;AN=2;BaseQRankSum=-2.838;DP=12;ExcessHet=3.0103;FS=0.000;MLEAC=1;MLEAF=0.500;MQ=60.00;MQRankSum=0.000;QD=21.47;ReadPosRankSum=-0.605;SOR=1.981	GT:AD:DP:GQ:PL	0/1:3,9:12:79:265,0,79	4	4.87341	5.32214	0.385496	0.119355	0.0661321	0.333424
d225006	Ib	jeb	FBgn0086677	-1	2R:12118534	0.617647	2R	12118534	T	A	AT	FALSE	68	1677.6	AC=1;AF=0.500;AN=2;BaseQRankSum=2.756;DP=68;ExcessHet=3.0103;FS=4.402;MLEAC=1;MLEAF=0.500;MQ=60.00;MQRankSum=0.000;QD=24.67;ReadPosRankSum=-0.467;SOR=1.823	GT:AD:DP:GQ:PL	0/1:26,42:68:99:1685,0,1008	4	4.87341	5.32214	0.385496	0.119355	0.0661321	0.333424
d225006	Ib	jeb	FBgn0086677	-1	2R:12118535	0.617647	2R	12118535	A	T	TA	FALSE	68	1677.6	AC=1;AF=0.500;AN=2;BaseQRankSum=4.865;DP=68;ExcessHet=3.0103;FS=4.402;MLEAC=1;MLEAF=0.500;MQ=60.00;MQRankSum=0.000;QD=24.67;ReadPosRankSum=-0.550;SOR=1.823	GT:AD:DP:GQ:PL	0/1:26,42:68:99:1685,0,1008	4	4.87341	5.32214	0.385496	0.119355	0.0661321	0.333424
d225006	Ib	jeb	FBgn0086677	-1	2R:12118732	0.5	2R	12118732	G	A	CT	FALSE	62	856.6	AC=1;AF=0.500;AN=2;BaseQRankSum=-4.216;DP=62;ExcessHet=3.0103;FS=3.505;MLEAC=1;MLEAF=0.500;MQ=60.00;MQRankSum=0.000;QD=13.82;ReadPosRankSum=-0.889;SOR=0.931	GT:AD:DP:GQ:PL	0/1:31,31:62:99:864,0,920	4	4.87341	5.32214	0.385496	0.119355	0.0661321	0.333424
d225006	Ib	Oda	FBgn0014184	-1	2R:12166767	0.107527	2R	12166767	C	T	GA	FALSE	657	375.6	AC=1;AF=0.500;AN=2;BaseQRankSum=-8.058;DP=657;ExcessHet=3.0103;FS=1.156;MLEAC=1;MLEAF=0.500;MQ=60.00;MQRankSum=0.000;QD=0.58;ReadPosRankSum=2.499;SOR=0.482	GT:AD:DP:GQ:PL	0/1:581,70:651:99:383,0,19018	4	9.15983	8.84911	0.10518	9.45199	9.25043	0.333424
d225006	Ib	Oda	FBgn0014184	-1	2R:12167169	0.478648	2R	12167169	C	T	GA	FALSE	563	7392.6	AC=1;AF=0.500;AN=2;BaseQRankSum=-12.256;DP=563;ExcessHet=3.0103;FS=1.311;MLEAC=1;MLEAF=0.500;MQ=60.00;MQRankSum=0.000;QD=13.15;ReadPosRankSum=-1.638;SOR=0.571	GT:AD:DP:GQ:PL	0/1:293,269:562:99:7400,0,8814	4	9.15983	8.84911	0.10518	9.45199	9.25043	0.333424
d225006	Ib	RpS11	FBgn0033699	-1	2R:12200182	0.514919	2R	12200182	A	G	TC	FALSE	1173	18490.6	AC=1;AF=0.500;AN=2;BaseQRankSum=20.799;DP=1173;ExcessHet=3.0103;FS=0.540;MLEAC=1;MLEAF=0.500;MQ=60.00;MQRankSum=0.000;QD=15.76;ReadPosRankSum=1.623;SOR=0.751	GT:AD:DP:GQ:PL	0/1:569,604:1173:99:18498,0,13864	4	11.6992	11.5734	0.0283431	11.6744	11.5512	0.333424
d225006	Ib	nemy	FBgn0261673	-1	2R:12660077	1	2R	12660077	G	A	CT	FALSE	12	354.02	AC=2;AF=1.00;AN=2;DP=12;ExcessHet=3.0103;FS=0.000;MLEAC=2;MLEAF=1.00;MQ=60.00;QD=29.50;SOR=0.693	GT:AD:DP:GQ:PL	1/1:0,12:12:36:368,36,0	4	2.14477	1.22614	0.010529	1.66041	1.71026	0.333424
d225006	Ib	nemy	FBgn0261673	-1	2R:12660178	0.818182	2R	12660178	C	T	GA	FALSE	11	293.6	AC=1;AF=0.500;AN=2;BaseQRankSum=-1.017;DP=11;ExcessHet=3.0103;FS=3.090;MLEAC=1;MLEAF=0.500;MQ=60.00;MQRankSum=0.000;QD=26.69;ReadPosRankSum=0.023;SOR=2.093	GT:AD:DP:GQ:PL	0/1:2,9:11:42:301,0,42	4	2.14477	1.22614	0.010529	1.66041	1.71026	0.333424
d225006	Ib	CG3955	FBgn0033793	-1	2R:13128051	0.741935	2R	13128051	G	A	CT	FALSE	31	646.6	AC=1;AF=0.500;AN=2;BaseQRankSum=-2.286;DP=31;ExcessHet=3.0103;FS=0.000;MLEAC=1;MLEAF=0.500;MQ=60.00;MQRankSum=0.000;QD=20.86;ReadPosRankSum=-0.543;SOR=0.487	GT:AD:DP:GQ:PL	0/1:8,23:31:99:654,0,187	4	4.54626	4.75042	0.982538	0.118374	0.14535	0.333424
d225006	Ib	CG3955	FBgn0033793	-1	2R:13128089	0.625	2R	13128089	A	C	TG	FALSE	56	1112.6	AC=1;AF=0.500;AN=2;BaseQRankSum=4.350;DP=56;ExcessHet=3.0103;FS=4.756;MLEAC=1;MLEAF=0.500;MQ=60.00;MQRankSum=0.000;QD=19.87;ReadPosRankSum=-0.111;SOR=1.508	GT:AD:DP:GQ:PL	0/1:21,35:56:99:1120,0,467	4	4.54626	4.75042	0.982538	0.118374	0.14535	0.333424
d225006	Ib	CG3955	FBgn0033793	-1	2R:13128191	0.585714	2R	13128191	C	A	GT	FALSE	70	1060.6	AC=1;AF=0.500;AN=2;BaseQRankSum=-3.400;DP=70;ExcessHet=3.0103;FS=6.478;MLEAC=1;MLEAF=0.500;MQ=60.00;MQRankSum=0.000;QD=15.15;ReadPosRankSum=2.426;SOR=0.896	GT:AD:DP:GQ:PL	0/1:29,41:70:99:1068,0,797	4	4.54626	4.75042	0.982538	0.118374	0.14535	0.333424
d225006	Ib	CG3955	FBgn0033793	-1	2R:13128207	0.603175	2R	13128207	G	C	CG	FALSE	63	1264.6	AC=1;AF=0.500;AN=2;BaseQRankSum=2.494;DP=63;ExcessHet=3.0103;FS=2.118;MLEAC=1;MLEAF=0.500;MQ=60.00;MQRankSum=0.000;QD=20.07;ReadPosRankSum=-0.893;SOR=0.857	GT:AD:DP:GQ:PL	0/1:25,38:63:99:1272,0,695	4	4.54626	4.75042	0.982538	0.118374	0.14535	0.333424
d225006	Ib	CG3955	FBgn0033793	-1	2R:13128738	0.458333	2R	13128738	G	A	CT	FALSE	72	1283.6	AC=1;AF=0.500;AN=2;BaseQRankSum=-3.063;DP=72;ExcessHet=3.0103;FS=2.076;MLEAC=1;MLEAF=0.500;MQ=60.00;MQRankSum=0.000;QD=17.83;ReadPosRankSum=1.059;SOR=1.082	GT:AD:DP:GQ:PL	0/1:39,33:72:99:1291,0,1483	4	4.54626	4.75042	0.982538	0.118374	0.14535	0.333424
d225006	Ib	CG3955	FBgn0033793	-1	2R:13128744	0.493151	2R	13128744	C	A	GT	FALSE	73	1353.6	AC=1;AF=0.500;AN=2;BaseQRankSum=-5.918;DP=73;ExcessHet=3.0103;FS=0.000;MLEAC=1;MLEAF=0.500;MQ=60.00;MQRankSum=0.000;QD=18.54;ReadPosRankSum=0.470;SOR=0.770	GT:AD:DP:GQ:PL	0/1:37,36:73:99:1361,0,1399	4	4.54626	4.75042	0.982538	0.118374	0.14535	0.333424
d225006	Ib	Mp20	FBgn0002789	1	2R:13247523	0.521127	2R	13247523	C	T	CT	FALSE	2502	31010.6	AC=1;AF=0.500;AN=2;BaseQRankSum=-24.387;DP=2502;ExcessHet=3.0103;FS=1.162;MLEAC=1;MLEAF=0.500;MQ=60.00;MQRankSum=0.000;QD=12.48;ReadPosRankSum=-0.691;SOR=0.603	GT:AD:DP:GQ:PL	0/1:1190,1295:2485:99:31018,0,34138	4	7.18425	6.72376	0.949291	12.518	12.5339	0.333424
d225006	Ib	bbc	FBgn0033844	-1	2R:13486963	0.352941	2R	13486963	G	C	CG	FALSE	17	159.6	AC=1;AF=0.500;AN=2;BaseQRankSum=0.627;DP=17;ExcessHet=3.0103;FS=2.218;MLEAC=1;MLEAF=0.500;MQ=60.00;MQRankSum=0.000;QD=9.39;ReadPosRankSum=-0.812;SOR=0.180	GT:AD:DP:GQ:PL	0/1:11,6:17:99:167,0,444	4	2.43079	2.35712	0.725008	1.06293	1.18129	0.333424
d225006	Ib	bbc	FBgn0033844	-1	2R:13487350	0.193548	2R	13487350	C	T	GA	FALSE	31	95.6	AC=1;AF=0.500;AN=2;BaseQRankSum=-2.717;DP=31;ExcessHet=3.0103;FS=4.943;MLEAC=1;MLEAF=0.500;MQ=60.00;MQRankSum=0.000;QD=3.08;ReadPosRankSum=-1.605;SOR=0.116	GT:AD:DP:GQ:PL	0/1:25,6:31:99:103,0,814	4	2.43079	2.35712	0.725008	1.06293	1.18129	0.333424
d225006	Ib	bbc	FBgn0033844	-1	2R:13494274	0.363636	2R	13494274	C	T	GA	FALSE	11	100.6	AC=1;AF=0.500;AN=2;BaseQRankSum=0.431;DP=11;ExcessHet=3.0103;FS=3.090;MLEAC=1;MLEAF=0.500;MQ=60.00;MQRankSum=0.000;QD=9.15;ReadPosRankSum=0.176;SOR=0.078	GT:AD:DP:GQ:PL	0/1:7,4:11:99:108,0,185	4	2.43079	2.35712	0.725008	1.06293	1.18129	0.333424
d225006	Ib	fl(2)d	FBgn0000662	-1	2R:13824501	0.736842	2R	13824501	G	T	CA	FALSE	19	355.6	AC=1;AF=0.500;AN=2;BaseQRankSum=-1.223;DP=19;ExcessHet=3.0103;FS=0.000;MLEAC=1;MLEAF=0.500;MQ=60.00;MQRankSum=0.000;QD=18.72;ReadPosRankSum=1.965;SOR=0.892	GT:AD:DP:GQ:PL	0/1:5,14:19:99:363,0,115	4	2.60305	2.3359	0.329402	1.82327	1.73325	0.333424
d225006	Ib	CG6329	FBgn0033872	1	2R:13829759	0.357143	2R	13829759	G	T	GT	FALSE	14	101.6	AC=1;AF=0.500;AN=2;BaseQRankSum=-3.481;DP=14;ExcessHet=3.0103;FS=0.000;MLEAC=1;MLEAF=0.500;MQ=60.00;MQRankSum=0.000;QD=7.26;ReadPosRankSum=-0.847;SOR=0.804	GT:AD:DP:GQ:PL	0/1:9,5:14:99:109,0,324	4	6.30782	5.19838	0.0246684	0.326178	0.229277	0.333424
d225006	Ib	CG6329	FBgn0033872	1	2R:13830968	0.263158	2R	13830968	A	C	AC	FALSE	19	127.6	AC=1;AF=0.500;AN=2;BaseQRankSum=2.467;DP=19;ExcessHet=3.0103;FS=5.651;MLEAC=1;MLEAF=0.500;MQ=60.00;MQRankSum=0.000;QD=6.72;ReadPosRankSum=0.280;SOR=0.090	GT:AD:DP:GQ:PL	0/1:14,5:19:99:135,0,440	4	6.30782	5.19838	0.0246684	0.326178	0.229277	0.333424
d225006	Ib	CG6329	FBgn0033872	1	2R:13832486	0.314815	2R	13832486	G	A	GA	FALSE	54	400.6	AC=1;AF=0.500;AN=2;BaseQRankSum=-4.778;DP=54;ExcessHet=3.0103;FS=6.405;MLEAC=1;MLEAF=0.500;MQ=60.00;MQRankSum=0.000;QD=7.42;ReadPosRankSum=0.149;SOR=1.737	GT:AD:DP:GQ:PL	0/1:37,17:54:99:408,0,1221	4	6.30782	5.19838	0.0246684	0.326178	0.229277	0.333424
d225006	Ib	eIF3m	FBgn0033902	-1	2R:14163780	0.494318	2R	14163780	C	G	GC	FALSE	176	2411.6	AC=1;AF=0.500;AN=2;BaseQRankSum=-1.522;DP=176;ExcessHet=3.0103;FS=0.554;MLEAC=1;MLEAF=0.500;MQ=60.00;MQRankSum=0.000;QD=13.70;ReadPosRankSum=-1.068;SOR=0.609	GT:AD:DP:GQ:PL	0/1:89,87:176:99:2419,0,2702	4	6.59068	6.83618	0.93599	5.76981	5.6464	0.333424
d225006	Ib	ReepB	FBgn0033906	1	2R:14172328	0.615917	2R	14172328	T	G	TG	FALSE	289	5445.6	AC=1;AF=0.500;AN=2;BaseQRankSum=9.780;DP=289;ExcessHet=3.0103;FS=0.439;MLEAC=1;MLEAF=0.500;MQ=60.00;MQRankSum=0.000;QD=18.84;ReadPosRankSum=1.955;SOR=0.743	GT:AD:DP:GQ:PL	0/1:111,178:289:99:5453,0,2682	4	8.82339	8.47452	0.973655	7.40431	7.35215	0.333424
d225006	Ib	ReepB	FBgn0033906	1	2R:14172453	0.607059	2R	14172453	A	C	AC	FALSE	428	8036.6	AC=1;AF=0.500;AN=2;BaseQRankSum=10.112;DP=428;ExcessHet=3.0103;FS=3.310;MLEAC=1;MLEAF=0.500;MQ=60.00;MQRankSum=0.000;QD=18.91;ReadPosRankSum=-1.447;SOR=0.488	GT:AD:DP:GQ:PL	0/1:167,258:425:99:8044,0,4225	4	8.82339	8.47452	0.973655	7.40431	7.35215	0.333424
d225006	Ib	cg	FBgn0000289	1	2R:14173877	0.310345	2R	14173877	A	C	AC	FALSE	29	239.6	AC=1;AF=0.500;AN=2;BaseQRankSum=3.839;DP=29;ExcessHet=3.0103;FS=3.744;MLEAC=1;MLEAF=0.500;MQ=60.00;MQRankSum=0.000;QD=8.26;ReadPosRankSum=-0.450;SOR=0.569	GT:AD:DP:GQ:PL	0/1:20,9:29:99:247,0,561	4	3.89465	2.86721	0.278372	1.66642	1.81859	0.333424
d225006	Ib	cg	FBgn0000289	1	2R:14174188	0.518519	2R	14174188	G	A	GA	FALSE	27	366.6	AC=1;AF=0.500;AN=2;BaseQRankSum=-2.272;DP=27;ExcessHet=3.0103;FS=1.690;MLEAC=1;MLEAF=0.500;MQ=60.00;MQRankSum=0.000;QD=13.58;ReadPosRankSum=-0.122;SOR=0.313	GT:AD:DP:GQ:PL	0/1:13,14:27:99:374,0,365	4	3.89465	2.86721	0.278372	1.66642	1.81859	0.333424
d225006	Ib	Opa1	FBgn0261276	-1	2R:14230770	0.56	2R	14230770	C	G	GC	FALSE	25	348.6	AC=1;AF=0.500;AN=2;BaseQRankSum=-3.746;DP=25;ExcessHet=3.0103;FS=3.909;MLEAC=1;MLEAF=0.500;MQ=60.00;MQRankSum=0.000;QD=13.94;ReadPosRankSum=2.115;SOR=0.223	GT:AD:DP:GQ:PL	0/1:11,14:25:99:356,0,356	4	2.40495	3.13511	0.394098	1.90917	1.64868	0.333424
d225006	Ib	Opa1	FBgn0261276	-1	2R:14230920	0.608696	2R	14230920	C	T	GA	FALSE	46	726.6	AC=1;AF=0.500;AN=2;BaseQRankSum=-1.705;DP=46;ExcessHet=3.0103;FS=6.360;MLEAC=1;MLEAF=0.500;MQ=60.00;MQRankSum=0.000;QD=15.80;ReadPosRankSum=1.465;SOR=1.296	GT:AD:DP:GQ:PL	0/1:18,28:46:99:734,0,439	4	2.40495	3.13511	0.394098	1.90917	1.64868	0.333424
d225006	Ib	Opa1	FBgn0261276	-1	2R:14234742	0.823529	2R	14234742	C	A	GT	FALSE	17	398.6	AC=1;AF=0.500;AN=2;BaseQRankSum=-2.696;DP=17;ExcessHet=3.0103;FS=0.000;MLEAC=1;MLEAF=0.500;MQ=60.00;MQRankSum=0.000;QD=23.45;ReadPosRankSum=1.028;SOR=1.148	GT:AD:DP:GQ:PL	0/1:3,14:17:67:406,0,67	4	2.40495	3.13511	0.394098	1.90917	1.64868	0.333424
d225006	Ib	CG8547	FBgn0033919	-1	2R:14261867	0.757576	2R	14261867	T	A	AT	FALSE	33	638.6	AC=1;AF=0.500;AN=2;BaseQRankSum=-0.504;DP=33;ExcessHet=3.0103;FS=13.248;MLEAC=1;MLEAF=0.500;MQ=60.00;MQRankSum=0.000;QD=19.35;ReadPosRankSum=-0.694;SOR=1.431	GT:AD:DP:GQ:PL	0/1:8,25:33:99:646,0,180	4	1.59954	1.67332	0.972817	5.30815	5.08423	0.333424
d225006	Ib	CG8547	FBgn0033919	-1	2R:14262097	0.72	2R	14262097	C	G	GC	FALSE	25	550.6	AC=1;AF=0.500;AN=2;BaseQRankSum=-2.345;DP=25;ExcessHet=3.0103;FS=2.036;MLEAC=1;MLEAF=0.500;MQ=60.00;MQRankSum=0.000;QD=22.02;ReadPosRankSum=0.091;SOR=0.248	GT:AD:DP:GQ:PL	0/1:7,18:25:99:558,0,195	4	1.59954	1.67332	0.972817	5.30815	5.08423	0.333424
d225006	Ib	Ih	FBgn0263397	1	2R:14277696	1	2R	14277696	G	A	GA	FALSE	17	570.03	AC=2;AF=1.00;AN=2;DP=17;ExcessHet=3.0103;FS=0.000;MLEAC=2;MLEAF=1.00;MQ=60.00;QD=33.53;SOR=1.739	GT:AD:DP:GQ:PL	1/1:0,17:17:51:584,51,0	4	4.3136	3.68182	0.0111521	1.23315	1.33225	0.333424
d225006	Ib	Ih	FBgn0263397	1	2R:14277734	1	2R	14277734	T	C	TC	FALSE	21	777.03	AC=2;AF=1.00;AN=2;DP=21;ExcessHet=3.0103;FS=0.000;MLEAC=2;MLEAF=1.00;MQ=60.00;QD=24.18;SOR=1.828	GT:AD:DP:GQ:PL	1/1:0,21:21:63:791,63,0	4	4.3136	3.68182	0.0111521	1.23315	1.33225	0.333424
d225006	Ib	Ih	FBgn0263397	1	2R:14278193	0.909091	2R	14278193	C	T	CT	FALSE	11	243.67	AC=1;AF=0.500;AN=2;BaseQRankSum=-1.492;DP=11;ExcessHet=3.0103;FS=4.393;MLEAC=1;MLEAF=0.500;MQ=60.00;MQRankSum=0.000;QD=22.15;ReadPosRankSum=-1.283;SOR=1.447	GT:AD:DP:GQ:PL	0/1:1,10:11:8:251,0,8	4	4.3136	3.68182	0.0111521	1.23315	1.33225	0.333424
d225006	Ib	Ih	FBgn0263397	1	2R:14278216	0.866667	2R	14278216	T	C	TC	FALSE	15	449.61	AC=1;AF=0.500;AN=2;BaseQRankSum=2.400;DP=15;ExcessHet=3.0103;FS=3.222;MLEAC=1;MLEAF=0.500;MQ=60.00;MQRankSum=0.000;QD=29.97;ReadPosRankSum=1.367;SOR=2.147	GT:AD:DP:GQ:PL	0/1:2,13:15:19:457,0,19	4	4.3136	3.68182	0.0111521	1.23315	1.33225	0.333424
d225006	Ib	Ih	FBgn0263397	1	2R:14278289	0.857143	2R	14278289	C	A	CA	FALSE	14	335.6	AC=1;AF=0.500;AN=2;BaseQRankSum=-2.357;DP=14;ExcessHet=3.0103;FS=0.000;MLEAC=1;MLEAF=0.500;MQ=60.00;MQRankSum=0.000;QD=23.97;ReadPosRankSum=1.113;SOR=0.914	GT:AD:DP:GQ:PL	0/1:2,12:14:38:343,0,38	4	4.3136	3.68182	0.0111521	1.23315	1.33225	0.333424
d225006	Ib	Flo1	FBgn0024754	-1	2R:15567324	0.824176	2R	15567324	C	T	GA	FALSE	91	2897.6	AC=1;AF=0.500;AN=2;BaseQRankSum=-2.325;DP=91;ExcessHet=3.0103;FS=0.000;MLEAC=1;MLEAF=0.500;MQ=60.00;MQRankSum=0.000;QD=31.84;ReadPosRankSum=-1.641;SOR=0.719	GT:AD:DP:GQ:PL	0/1:16,75:91:99:2905,0,413	4	5.86928	5.98113	0.893514	2.83351	2.97426	0.333424
d225006	Ib	Flo1	FBgn0024754	-1	2R:15569173	0.641026	2R	15569173	C	T	GA	FALSE	39	1000.6	AC=1;AF=0.500;AN=2;BaseQRankSum=-4.548;DP=39;ExcessHet=3.0103;FS=5.035;MLEAC=1;MLEAF=0.500;MQ=60.00;MQRankSum=0.000;QD=25.66;ReadPosRankSum=2.301;SOR=1.251	GT:AD:DP:GQ:PL	0/1:14,25:39:99:1008,0,570	4	5.86928	5.98113	0.893514	2.83351	2.97426	0.333424
d225006	Ib	Flo1	FBgn0024754	-1	2R:15569181	0.696429	2R	15569181	C	G	GC	FALSE	56	1578.6	AC=1;AF=0.500;AN=2;BaseQRankSum=0.906;DP=56;ExcessHet=3.0103;FS=1.093;MLEAC=1;MLEAF=0.500;MQ=60.00;MQRankSum=0.000;QD=28.19;ReadPosRankSum=-1.093;SOR=0.536	GT:AD:DP:GQ:PL	0/1:17,39:56:99:1586,0,710	4	5.86928	5.98113	0.893514	2.83351	2.97426	0.333424
d225006	Ib	Diap2	FBgn0015247	-1	2R:15932335	0.703704	2R	15932335	C	T	GA	FALSE	27	530.6	AC=1;AF=0.500;AN=2;BaseQRankSum=-4.334;DP=27;ExcessHet=3.0103;FS=1.705;MLEAC=1;MLEAF=0.500;MQ=60.00;MQRankSum=0.000;QD=19.65;ReadPosRankSum=-1.411;SOR=1.292	GT:AD:DP:GQ:PL	0/1:8,19:27:99:538,0,227	4	2.21743	2.14379	0.569937	1.94321	1.78065	0.333424
d225006	Ib	Diap2	FBgn0015247	-1	2R:15932794	1	2R	15932794	A	G	TC	FALSE	52	2326.03	AC=2;AF=1.00;AN=2;DP=52;ExcessHet=3.0103;FS=0.000;MLEAC=2;MLEAF=1.00;MQ=60.00;QD=32.15;SOR=1.036	GT:AD:DP:GQ:PL	1/1:0,52:52:99:2340,157,0	4	2.21743	2.14379	0.569937	1.94321	1.78065	0.333424
d225006	Ib	bug	FBgn0034050	1	2R:15935142	0.424242	2R	15935142	C	A	CA	FALSE	33	325.6	AC=1;AF=0.500;AN=2;BaseQRankSum=-0.460;DP=33;ExcessHet=3.0103;FS=1.431;MLEAC=1;MLEAF=0.500;MQ=60.00;MQRankSum=0.000;QD=9.87;ReadPosRankSum=-1.005;SOR=1.041	GT:AD:DP:GQ:PL	0/1:19,14:33:99:333,0,479	4	1.45112	2.51366	0.00831639	1.71608	1.56393	0.333424
d225006	Ib	bug	FBgn0034050	1	2R:15935315	0.385714	2R	15935315	C	A	CA	FALSE	70	1007.6	AC=1;AF=0.500;AN=2;BaseQRankSum=-3.595;DP=70;ExcessHet=3.0103;FS=10.551;MLEAC=1;MLEAF=0.500;MQ=60.00;MQRankSum=0.000;QD=14.39;ReadPosRankSum=-1.896;SOR=0.865	GT:AD:DP:GQ:PL	0/1:43,27:70:99:1015,0,1671	4	1.45112	2.51366	0.00831639	1.71608	1.56393	0.333424
d225006	Ib	bug	FBgn0034050	1	2R:15935324	0.4	2R	15935324	C	T	CT	FALSE	70	991.6	AC=1;AF=0.500;AN=2;BaseQRankSum=-4.733;DP=70;ExcessHet=3.0103;FS=15.642;MLEAC=1;MLEAF=0.500;MQ=60.00;MQRankSum=0.000;QD=14.17;ReadPosRankSum=-1.327;SOR=1.481	GT:AD:DP:GQ:PL	0/1:42,28:70:99:999,0,1698	4	1.45112	2.51366	0.00831639	1.71608	1.56393	0.333424
d225006	Ib	Mlf	FBgn0034051	-1	2R:15939086	0.24	2R	15939086	G	T	CA	FALSE	25	123.6	AC=1;AF=0.500;AN=2;BaseQRankSum=0.261;DP=25;ExcessHet=3.0103;FS=11.364;MLEAC=1;MLEAF=0.500;MQ=60.00;MQRankSum=0.000;QD=4.94;ReadPosRankSum=-1.983;SOR=2.238	GT:AD:DP:GQ:PL	0/1:19,6:25:99:131,0,580	4	4.90198	5.10387	0.4882	1.76384	1.83569	0.333424
d225006	Ib	CG8314	FBgn0034057	-1	2R:15989921	0.777778	2R	15989921	A	C	TG	FALSE	45	1134.6	AC=1;AF=0.500;AN=2;BaseQRankSum=3.040;DP=45;ExcessHet=3.0103;FS=3.108;MLEAC=1;MLEAF=0.500;MQ=60.00;MQRankSum=0.000;QD=25.21;ReadPosRankSum=1.121;SOR=1.308	GT:AD:DP:GQ:PL	0/1:10,35:45:99:1142,0,195	4	3.37659	3.91756	0.729489	2.94954	2.98204	0.333424
d225006	Ib	CG8320	FBgn0034059	1	2R:15993193	0.540541	2R	15993193	T	C	TC	FALSE	37	615.6	AC=1;AF=0.500;AN=2;BaseQRankSum=4.386;DP=37;ExcessHet=3.0103;FS=17.618;MLEAC=1;MLEAF=0.500;MQ=60.00;MQRankSum=0.000;QD=16.64;ReadPosRankSum=-0.674;SOR=0.035	GT:AD:DP:GQ:PL	0/1:17,20:37:99:623,0,425	4	3.3196	3.11592	0.958839	1.9464	2.06793	0.333424
d225006	Ib	ATPCL	FBgn0020236	-1	2R:15994473	0.707602	2R	15994473	G	T	CA	FALSE	171	3452.6	AC=1;AF=0.500;AN=2;BaseQRankSum=-7.682;DP=171;ExcessHet=3.0103;FS=2.257;MLEAC=1;MLEAF=0.500;MQ=60.00;MQRankSum=0.000;QD=20.19;ReadPosRankSum=-2.383;SOR=0.493	GT:AD:DP:GQ:PL	0/1:50,121:171:99:3460,0,1364	4	3.02082	2.76401	0.392183	2.11232	1.97778	0.333424
d225006	Ib	Ufc1	FBgn0034061	-1	2R:16007156	0.461538	2R	16007156	C	G	GC	FALSE	104	1411.6	AC=1;AF=0.500;AN=2;BaseQRankSum=3.633;DP=104;ExcessHet=3.0103;FS=3.473;MLEAC=1;MLEAF=0.500;MQ=60.00;MQRankSum=0.000;QD=13.57;ReadPosRankSum=-1.265;SOR=1.194	GT:AD:DP:GQ:PL	0/1:56,48:104:99:1419,0,1702	4	3.89671	4.76406	0.198863	4.33244	4.42744	0.333424
d225006	Ib	Prosbeta1	FBgn0010590	-1	2R:16014304	0.498575	2R	16014304	A	G	TC	FALSE	704	10881.6	AC=1;AF=0.500;AN=2;BaseQRankSum=18.808;DP=704;ExcessHet=3.0103;FS=4.960;MLEAC=1;MLEAF=0.500;MQ=60.00;MQRankSum=0.000;QD=15.50;ReadPosRankSum=-0.089;SOR=0.927	GT:AD:DP:GQ:PL	0/1:352,350:702:99:10889,0,9425	4	7.74825	8.59438	0.615658	8.00597	7.82072	0.333424
d225006	Ib	Ric	FBgn0265605	-1	2R:16107817	0.916667	2R	16107817	C	T	GA	FALSE	12	298.81	AC=1;AF=0.500;AN=2;BaseQRankSum=-1.505;DP=12;ExcessHet=3.0103;FS=0.000;MLEAC=1;MLEAF=0.500;MQ=60.00;MQRankSum=0.000;QD=24.90;ReadPosRankSum=0.000;SOR=0.477	GT:AD:DP:GQ:PL	0/1:1,11:12:3:306,0,3	4	4.76805	4.74994	0.98195	2.18522	1.83667	0.333424
d225006	Ib	Ric	FBgn0265605	-1	2R:16107883	0.769231	2R	16107883	T	G	AC	FALSE	13	305.6	AC=1;AF=0.500;AN=2;BaseQRankSum=1.915;DP=13;ExcessHet=3.0103;FS=0.000;MLEAC=1;MLEAF=0.500;MQ=60.00;MQRankSum=0.000;QD=23.51;ReadPosRankSum=0.000;SOR=1.022	GT:AD:DP:GQ:PL	0/1:3,10:13:44:313,0,44	4	4.76805	4.74994	0.98195	2.18522	1.83667	0.333424
d225006	Ib	Ric	FBgn0265605	-1	2R:16108538	0.642857	2R	16108538	T	A	AT	FALSE	14	158.6	AC=1;AF=0.500;AN=2;BaseQRankSum=-1.384;DP=14;ExcessHet=3.0103;FS=0.000;MLEAC=1;MLEAF=0.500;MQ=60.00;MQRankSum=0.000;QD=11.33;ReadPosRankSum=-0.447;SOR=0.593	GT:AD:DP:GQ:PL	0/1:5,9:14:99:166,0,113	4	4.76805	4.74994	0.98195	2.18522	1.83667	0.333424
d225006	Ib	Ric	FBgn0265605	-1	2R:16108576	0.727273	2R	16108576	A	G	TC	FALSE	11	241.6	AC=1;AF=0.500;AN=2;BaseQRankSum=1.317;DP=11;ExcessHet=3.0103;FS=2.632;MLEAC=1;MLEAF=0.500;MQ=60.00;MQRankSum=0.000;QD=21.96;ReadPosRankSum=-2.253;SOR=0.991	GT:AD:DP:GQ:PL	0/1:3,8:11:73:249,0,73	4	4.76805	4.74994	0.98195	2.18522	1.83667	0.333424
d225006	Ib	Ric	FBgn0265605	-1	2R:16108823	0.866667	2R	16108823	T	G	AC	FALSE	15	464.6	AC=1;AF=0.500;AN=2;BaseQRankSum=2.500;DP=15;ExcessHet=3.0103;FS=0.000;MLEAC=1;MLEAF=0.500;MQ=60.00;MQRankSum=0.000;QD=30.97;ReadPosRankSum=0.170;SOR=1.609	GT:AD:DP:GQ:PL	0/1:2,13:15:24:472,0,24	4	4.76805	4.74994	0.98195	2.18522	1.83667	0.333424
d225006	Ib	Got1	FBgn0001124	1	2R:16141839	0.461207	2R	16141839	A	T	AT	FALSE	232	2759.6	AC=1;AF=0.500;AN=2;BaseQRankSum=3.197;DP=232;ExcessHet=3.0103;FS=9.802;MLEAC=1;MLEAF=0.500;MQ=60.00;MQRankSum=0.000;QD=11.89;ReadPosRankSum=2.793;SOR=0.255	GT:AD:DP:GQ:PL	0/1:125,107:232:99:2767,0,3330	4	4.46672	4.50823	0.923616	5.08115	5.69811	0.333424
d225006	Ib	CG42837	FBgn0262026	1	2R:16198143	0.660714	2R	16198143	A	C	AC	FALSE	56	1208.6	AC=1;AF=0.500;AN=2;BaseQRankSum=5.570;DP=56;ExcessHet=3.0103;FS=1.279;MLEAC=1;MLEAF=0.500;MQ=60.00;MQRankSum=0.000;QD=21.58;ReadPosRankSum=0.942;SOR=1.022	GT:AD:DP:GQ:PL	0/1:19,37:56:99:1216,0,465	4	2.27932	2.35137	0.939676	3.27598	3.14269	0.333424
d225006	Ib	eEF1beta	FBgn0028737	1	2R:16869128	0.252874	2R	16869128	G	C	GC	FALSE	88	323.6	AC=1;AF=0.500;AN=2;BaseQRankSum=-0.328;DP=88;ExcessHet=3.0103;FS=0.000;MLEAC=1;MLEAF=0.500;MQ=60.00;MQRankSum=0.000;QD=3.72;ReadPosRankSum=-1.808;SOR=0.458	GT:AD:DP:GQ:PL	0/1:65,22:87:99:331,0,2063	4	9.7995	9.46589	0.958839	9.11504	9.06539	0.333424
d225006	Ib	eEF1beta	FBgn0028737	1	2R:16869133	0.395349	2R	16869133	T	A	TA	FALSE	43	420.6	AC=1;AF=0.500;AN=2;BaseQRankSum=3.802;DP=43;ExcessHet=3.0103;FS=0.000;MLEAC=1;MLEAF=0.500;MQ=60.00;MQRankSum=0.000;QD=9.78;ReadPosRankSum=-5.488;SOR=1.071	GT:AD:DP:GQ:PL	0/1:26,17:43:99:428,0,997	4	9.7995	9.46589	0.958839	9.11504	9.06539	0.333424
d225006	Ib	mbl	FBgn0265487	1	2R:17379282	0.176471	2R	17379282	A	C	AC	FALSE	35	39.6	AC=1;AF=0.500;AN=2;BaseQRankSum=-2.948;DP=35;ExcessHet=3.0103;FS=6.876;MLEAC=1;MLEAF=0.500;MQ=60.00;MQRankSum=0.000;QD=1.16;ReadPosRankSum=-2.205;SOR=0.064	GT:AD:DP:GQ:PL	0/1:28,6:34:47:47,0,799	4	7.78883	7.80422	0.853422	4.6302	4.32818	0.333424
d225006	Ib	mthl3	FBgn0028956	-1	2R:17448808	0.380952	2R	17448808	C	A	GT	FALSE	21	289.6	AC=1;AF=0.500;AN=2;BaseQRankSum=1.888;DP=21;ExcessHet=3.0103;FS=36.553;MLEAC=1;MLEAF=0.500;MQ=60.00;MQRankSum=0.000;QD=13.79;ReadPosRankSum=-3.806;SOR=4.395	GT:AD:DP:GQ:PL	0/1:13,8:21:99:297,0,522	4	0.814694	0.546976	0.535499	2.78478	2.80729	0.333424
d225006	Ib	Cth	FBgn0000566	1	2R:18629347	1	2R	18629347	G	T	GT	FALSE	15	737.03	AC=2;AF=1.00;AN=2;DP=15;ExcessHet=3.0103;FS=0.000;MLEAC=2;MLEAF=1.00;MQ=60.00;QD=34.56;SOR=3.126	GT:AD:DP:GQ:PL	1/1:0,15:15:51:751,51,0	4	3.68245	2.94686	0.326511	4.49188	4.5084	0.333424
d225006	Ib	Ntan1	FBgn0034371	-1	2R:18641543	0.217391	2R	18641543	C	T	GA	FALSE	46	225.6	AC=1;AF=0.500;AN=2;BaseQRankSum=-2.813;DP=46;ExcessHet=3.0103;FS=2.439;MLEAC=1;MLEAF=0.500;MQ=60.00;MQRankSum=0.000;QD=4.90;ReadPosRankSum=3.398;SOR=1.659	GT:AD:DP:GQ:PL	0/1:36,10:46:99:233,0,1246	4	1.74806	1.63075	0.811332	0.596864	1.10171	0.333424
d225006	Ib	Ntan1	FBgn0034371	-1	2R:18641716	0.567568	2R	18641716	C	T	GA	FALSE	37	542.6	AC=1;AF=0.500;AN=2;BaseQRankSum=-3.141;DP=37;ExcessHet=3.0103;FS=0.000;MLEAC=1;MLEAF=0.500;MQ=60.00;MQRankSum=0.000;QD=14.66;ReadPosRankSum=-1.849;SOR=0.733	GT:AD:DP:GQ:PL	0/1:16,21:37:99:550,0,460	4	1.74806	1.63075	0.811332	0.596864	1.10171	0.333424
d225006	Ib	Fkbp12	FBgn0013954	1	2R:19290961	0.289474	2R	19290961	T	A	TA	FALSE	45	226.6	AC=1;AF=0.500;AN=2;BaseQRankSum=-0.332;DP=45;ExcessHet=3.0103;FS=5.384;MLEAC=1;MLEAF=0.500;MQ=60.00;MQRankSum=0.000;QD=5.96;ReadPosRankSum=-1.755;SOR=0.038	GT:AD:DP:GQ:PL	0/1:27,11:38:99:234,0,1040	4	10.9805	10.3498	0.300057	7.54456	7.90627	0.333424
d225006	Ib	betaTub56D	FBgn0284243	-1	2R:19447599	0.203569	2R	19447599	C	T	GA	FALSE	1794	10660.6	AC=1;AF=0.500;AN=2;BaseQRankSum=-17.496;DP=1794;ExcessHet=3.0103;FS=75.157;MLEAC=1;MLEAF=0.500;MQ=60.00;MQRankSum=0.000;QD=5.95;ReadPosRankSum=-14.066;SOR=3.997	GT:AD:DP:GQ:PL	0/1:1428,365:1793:99:10668,0,61047	4	12.035	12.8548	5.33957e-11	7.87017	8.37422	0.333424
d225006	Ib	CG8929	FBgn0034504	1	2R:20330621	0.125	2R	20330621	C	T	CT	FALSE	128	31.6	AC=1;AF=0.500;AN=2;BaseQRankSum=-4.561;DP=128;ExcessHet=3.0103;FS=8.805;MLEAC=1;MLEAF=0.500;MQ=60.00;MQRankSum=0.000;QD=0.25;ReadPosRankSum=1.699;SOR=0.101	GT:AD:DP:GQ:PL	0/1:112,16:128:39:39,0,3519	4	4.60915	4.56406	0.346159	2.77115	2.34501	0.333424
d225006	Ib	CG9344	FBgn0034564	1	2R:20977348	0.487805	2R	20977348	C	T	CT	FALSE	164	2235.6	AC=1;AF=0.500;AN=2;BaseQRankSum=-7.715;DP=164;ExcessHet=3.0103;FS=0.000;MLEAC=1;MLEAF=0.500;MQ=60.00;MQRankSum=0.000;QD=13.63;ReadPosRankSum=1.557;SOR=0.666	GT:AD:DP:GQ:PL	0/1:84,80:164:99:2243,0,2579	4	5.06235	4.57082	0.595889	1.73156	2.29314	0.333424
d225006	Ib	CG9344	FBgn0034564	1	2R:20977417	0.521127	2R	20977417	C	T	CT	FALSE	142	1849.6	AC=1;AF=0.500;AN=2;BaseQRankSum=-3.928;DP=142;ExcessHet=3.0103;FS=5.153;MLEAC=1;MLEAF=0.500;MQ=60.00;MQRankSum=0.000;QD=13.03;ReadPosRankSum=-0.104;SOR=1.125	GT:AD:DP:GQ:PL	0/1:68,74:142:99:1857,0,2626	4	5.06235	4.57082	0.595889	1.73156	2.29314	0.333424
d225006	Ib	Sou	FBgn0034573	-1	2R:21016832	0.347826	2R	21016832	G	A	CT	FALSE	23	198.6	AC=1;AF=0.500;AN=2;BaseQRankSum=-3.981;DP=23;ExcessHet=3.0103;FS=0.000;MLEAC=1;MLEAF=0.500;MQ=60.00;MQRankSum=0.000;QD=8.63;ReadPosRankSum=-0.097;SOR=1.022	GT:AD:DP:GQ:PL	0/1:15,8:23:99:206,0,602	4	2.95745	3.85414	0.380807	3.50411	3.17497	0.333424
d225006	Ib	Sou	FBgn0034573	-1	2R:21016874	0.393939	2R	21016874	C	A	GT	FALSE	34	271.6	AC=1;AF=0.500;AN=2;BaseQRankSum=-4.381;DP=34;ExcessHet=3.0103;FS=3.176;MLEAC=1;MLEAF=0.500;MQ=60.00;MQRankSum=0.000;QD=8.23;ReadPosRankSum=-0.925;SOR=1.080	GT:AD:DP:GQ:PL	0/1:20,13:33:99:279,0,648	4	2.95745	3.85414	0.380807	3.50411	3.17497	0.333424
d225006	Ib	RIC-3	FBgn0050296	1	2R:21024819	0.619048	2R	21024819	T	A	TA	FALSE	21	511.6	AC=1;AF=0.500;AN=2;BaseQRankSum=-1.376;DP=21;ExcessHet=3.0103;FS=0.000;MLEAC=1;MLEAF=0.500;MQ=60.00;MQRankSum=0.000;QD=24.36;ReadPosRankSum=0.510;SOR=0.551	GT:AD:DP:GQ:PL	0/1:8,13:21:99:519,0,339	4	2.4539	2.55791	0.576762	3.57648	3.13137	0.333424
d225006	Ib	RIC-3	FBgn0050296	1	2R:21024821	0.571429	2R	21024821	C	A	CA	FALSE	21	543.6	AC=1;AF=0.500;AN=2;BaseQRankSum=-1.331;DP=21;ExcessHet=3.0103;FS=0.000;MLEAC=1;MLEAF=0.500;MQ=60.00;MQRankSum=0.000;QD=25.89;ReadPosRankSum=0.784;SOR=0.631	GT:AD:DP:GQ:PL	0/1:9,12:21:99:551,0,336	4	2.4539	2.55791	0.576762	3.57648	3.13137	0.333424
d225006	Ib	RIC-3	FBgn0050296	1	2R:21024825	0.55	2R	21024825	C	T	CT	FALSE	20	417.6	AC=1;AF=0.500;AN=2;BaseQRankSum=-0.723;DP=20;ExcessHet=3.0103;FS=2.473;MLEAC=1;MLEAF=0.500;MQ=60.00;MQRankSum=0.000;QD=20.88;ReadPosRankSum=0.419;SOR=1.659	GT:AD:DP:GQ:PL	0/1:9,11:20:99:425,0,345	4	2.4539	2.55791	0.576762	3.57648	3.13137	0.333424
d225006	Ib	mago	FBgn0002736	1	2R:21128651	0.540541	2R	21128651	T	C	TC	FALSE	74	1491.6	AC=1;AF=0.500;AN=2;BaseQRankSum=3.962;DP=74;ExcessHet=3.0103;FS=3.675;MLEAC=1;MLEAF=0.500;MQ=60.00;MQRankSum=0.000;QD=20.16;ReadPosRankSum=-1.325;SOR=0.341	GT:AD:DP:GQ:PL	0/1:34,40:74:99:1499,0,1254	4	3.46187	3.46022	0.901201	3.13284	3.19197	0.333424
d225006	Ib	mago	FBgn0002736	1	2R:21128682	0.5	2R	21128682	C	A	CA	FALSE	84	1580.6	AC=1;AF=0.500;AN=2;BaseQRankSum=-3.345;DP=84;ExcessHet=3.0103;FS=0.877;MLEAC=1;MLEAF=0.500;MQ=60.00;MQRankSum=0.000;QD=18.82;ReadPosRankSum=1.196;SOR=0.511	GT:AD:DP:GQ:PL	0/1:42,42:84:99:1588,0,1582	4	3.46187	3.46022	0.901201	3.13284	3.19197	0.333424
d225006	Ib	mago	FBgn0002736	1	2R:21128685	0.5	2R	21128685	G	A	GA	FALSE	78	1580.6	AC=1;AF=0.500;AN=2;BaseQRankSum=-2.731;DP=78;ExcessHet=3.0103;FS=0.000;MLEAC=1;MLEAF=0.500;MQ=60.00;MQRankSum=0.000;QD=20.26;ReadPosRankSum=1.322;SOR=0.595	GT:AD:DP:GQ:PL	0/1:39,39:78:99:1588,0,1593	4	3.46187	3.46022	0.901201	3.13284	3.19197	0.333424
d225006	Ib	mago	FBgn0002736	1	2R:21129039	0.516779	2R	21129039	G	A	GA	FALSE	149	1957.6	AC=1;AF=0.500;AN=2;BaseQRankSum=-7.778;DP=149;ExcessHet=3.0103;FS=2.892;MLEAC=1;MLEAF=0.500;MQ=60.00;MQRankSum=0.000;QD=13.14;ReadPosRankSum=-0.205;SOR=0.843	GT:AD:DP:GQ:PL	0/1:72,77:149:99:1965,0,2220	4	3.46187	3.46022	0.901201	3.13284	3.19197	0.333424
d225006	Ib	mago	FBgn0002736	1	2R:21129090	0.567568	2R	21129090	G	C	GC	FALSE	111	1981.6	AC=1;AF=0.500;AN=2;BaseQRankSum=3.208;DP=111;ExcessHet=3.0103;FS=1.536;MLEAC=1;MLEAF=0.500;MQ=60.00;MQRankSum=0.000;QD=17.85;ReadPosRankSum=-1.554;SOR=0.582	GT:AD:DP:GQ:PL	0/1:48,63:111:99:1989,0,1309	4	3.46187	3.46022	0.901201	3.13284	3.19197	0.333424
d225006	Ib	mago	FBgn0002736	1	2R:21129177	0.640777	2R	21129177	C	T	CT	FALSE	103	2630.6	AC=1;AF=0.500;AN=2;BaseQRankSum=-8.956;DP=103;ExcessHet=3.0103;FS=6.370;MLEAC=1;MLEAF=0.500;MQ=60.00;MQRankSum=0.000;QD=25.54;ReadPosRankSum=-0.625;SOR=0.243	GT:AD:DP:GQ:PL	0/1:37,66:103:99:2638,0,1437	4	3.46187	3.46022	0.901201	3.13284	3.19197	0.333424
d225006	Ib	mago	FBgn0002736	1	2R:21129183	0.633663	2R	21129183	C	T	CT	FALSE	101	2718.6	AC=1;AF=0.500;AN=2;BaseQRankSum=-8.196;DP=101;ExcessHet=3.0103;FS=8.061;MLEAC=1;MLEAF=0.500;MQ=60.00;MQRankSum=0.000;QD=26.92;ReadPosRankSum=0.149;SOR=0.226	GT:AD:DP:GQ:PL	0/1:37,64:101:99:2726,0,1430	4	3.46187	3.46022	0.901201	3.13284	3.19197	0.333424
d225006	Ib	mago	FBgn0002736	1	2R:21129186	0.637255	2R	21129186	G	A	GA	FALSE	102	2567.6	AC=1;AF=0.500;AN=2;BaseQRankSum=-7.758;DP=102;ExcessHet=3.0103;FS=8.078;MLEAC=1;MLEAF=0.500;MQ=60.00;MQRankSum=0.000;QD=25.17;ReadPosRankSum=0.454;SOR=0.207	GT:AD:DP:GQ:PL	0/1:37,65:102:99:2575,0,1415	4	3.46187	3.46022	0.901201	3.13284	3.19197	0.333424
d225006	Ib	mago	FBgn0002736	1	2R:21129211	0.670732	2R	21129211	T	C	TC	FALSE	82	1603.6	AC=1;AF=0.500;AN=2;BaseQRankSum=0.521;DP=82;ExcessHet=3.0103;FS=0.000;MLEAC=1;MLEAF=0.500;MQ=60.00;MQRankSum=0.000;QD=19.56;ReadPosRankSum=0.525;SOR=0.833	GT:AD:DP:GQ:PL	0/1:27,55:82:99:1611,0,637	4	3.46187	3.46022	0.901201	3.13284	3.19197	0.333424
d225006	Ib	mago	FBgn0002736	1	2R:21129284	0.614583	2R	21129284	A	T	AT	FALSE	96	2147.6	AC=1;AF=0.500;AN=2;BaseQRankSum=-1.150;DP=96;ExcessHet=3.0103;FS=1.098;MLEAC=1;MLEAF=0.500;MQ=60.00;MQRankSum=0.000;QD=22.37;ReadPosRankSum=-1.966;SOR=0.521	GT:AD:DP:GQ:PL	0/1:37,59:96:99:2155,0,1237	4	3.46187	3.46022	0.901201	3.13284	3.19197	0.333424
d225006	Ib	mago	FBgn0002736	1	2R:21129294	0.611111	2R	21129294	T	C	TC	FALSE	72	2002.6	AC=1;AF=0.500;AN=2;BaseQRankSum=2.728;DP=72;ExcessHet=3.0103;FS=0.000;MLEAC=1;MLEAF=0.500;MQ=60.00;MQRankSum=0.000;QD=27.81;ReadPosRankSum=-2.830;SOR=0.662	GT:AD:DP:GQ:PL	0/1:28,44:72:99:2010,0,1273	4	3.46187	3.46022	0.901201	3.13284	3.19197	0.333424
d225006	Ib	mago	FBgn0002736	1	2R:21129415	0.6	2R	21129415	G	A	GA	FALSE	15	370.6	AC=1;AF=0.500;AN=2;BaseQRankSum=-1.282;DP=15;ExcessHet=3.0103;FS=5.021;MLEAC=1;MLEAF=0.500;MQ=60.00;MQRankSum=0.000;QD=24.71;ReadPosRankSum=-1.097;SOR=1.230	GT:AD:DP:GQ:PL	0/1:6,9:15:99:378,0,222	4	3.46187	3.46022	0.901201	3.13284	3.19197	0.333424
d225006	Ib	mago	FBgn0002736	1	2R:21129422	0.5625	2R	21129422	A	C	AC	FALSE	16	328.6	AC=1;AF=0.500;AN=2;BaseQRankSum=0.466;DP=16;ExcessHet=3.0103;FS=5.021;MLEAC=1;MLEAF=0.500;MQ=60.00;MQRankSum=0.000;QD=20.54;ReadPosRankSum=0.569;SOR=1.198	GT:AD:DP:GQ:PL	0/1:7,9:16:99:336,0,254	4	3.46187	3.46022	0.901201	3.13284	3.19197	0.333424
d225006	Ib	mago	FBgn0002736	1	2R:21129440	0.647059	2R	21129440	G	C	GC	FALSE	17	436.6	AC=1;AF=0.500;AN=2;BaseQRankSum=-1.175;DP=17;ExcessHet=3.0103;FS=1.913;MLEAC=1;MLEAF=0.500;MQ=60.00;MQRankSum=0.000;QD=25.68;ReadPosRankSum=1.208;SOR=1.270	GT:AD:DP:GQ:PL	0/1:6,11:17:99:444,0,219	4	3.46187	3.46022	0.901201	3.13284	3.19197	0.333424
d225006	Ib	mago	FBgn0002736	1	2R:21129442	0.647059	2R	21129442	A	C	AC	FALSE	17	436.6	AC=1;AF=0.500;AN=2;BaseQRankSum=1.129;DP=17;ExcessHet=3.0103;FS=1.913;MLEAC=1;MLEAF=0.500;MQ=60.00;MQRankSum=0.000;QD=25.68;ReadPosRankSum=0.857;SOR=1.270	GT:AD:DP:GQ:PL	0/1:6,11:17:99:444,0,219	4	3.46187	3.46022	0.901201	3.13284	3.19197	0.333424
d225006	Ib	mago	FBgn0002736	1	2R:21129462	0.625	2R	21129462	T	A	TA	FALSE	16	377.6	AC=1;AF=0.500;AN=2;BaseQRankSum=0.357;DP=16;ExcessHet=3.0103;FS=0.000;MLEAC=1;MLEAF=0.500;MQ=60.00;MQRankSum=0.000;QD=23.60;ReadPosRankSum=-0.272;SOR=0.693	GT:AD:DP:GQ:PL	0/1:6,10:16:99:385,0,222	4	3.46187	3.46022	0.901201	3.13284	3.19197	0.333424
d225006	Ib	mago	FBgn0002736	1	2R:21129465	0.6	2R	21129465	C	T	CT	FALSE	15	351.6	AC=1;AF=0.500;AN=2;BaseQRankSum=-1.585;DP=15;ExcessHet=3.0103;FS=0.000;MLEAC=1;MLEAF=0.500;MQ=60.00;MQRankSum=0.000;QD=23.44;ReadPosRankSum=0.119;SOR=0.892	GT:AD:DP:GQ:PL	0/1:6,9:15:99:359,0,225	4	3.46187	3.46022	0.901201	3.13284	3.19197	0.333424
d225006	Ib	Xbp1	FBgn0021872	1	2R:21144020	0.327586	2R	21144020	G	A	GA	FALSE	116	857.6	AC=1;AF=0.500;AN=2;BaseQRankSum=-6.417;DP=116;ExcessHet=3.0103;FS=9.241;MLEAC=1;MLEAF=0.500;MQ=60.00;MQRankSum=0.000;QD=7.39;ReadPosRankSum=0.417;SOR=1.280	GT:AD:DP:GQ:PL	0/1:78,38:116:99:865,0,2498	4	6.37675	5.94381	0.755289	5.67561	5.11164	0.333424
d225006	Ib	CG44245	FBgn0265180	1	2R:21211826	0.447531	2R	21211826	G	A	GA	FALSE	648	7811.6	AC=1;AF=0.500;AN=2;BaseQRankSum=-15.412;DP=648;ExcessHet=3.0103;FS=1.736;MLEAC=1;MLEAF=0.500;MQ=60.00;MQRankSum=0.000;QD=12.05;ReadPosRankSum=-1.322;SOR=0.739	GT:AD:DP:GQ:PL	0/1:358,290:648:99:7819,0,11346	4	4.99076	3.81368	0.0254466	6.55123	7.5599	0.333424
d225006	Ib	CG44245	FBgn0265180	1	2R:21211985	0.464809	2R	21211985	T	G	TG	FALSE	682	9470.6	AC=1;AF=0.500;AN=2;BaseQRankSum=13.797;DP=682;ExcessHet=3.0103;FS=1.151;MLEAC=1;MLEAF=0.500;MQ=60.00;MQRankSum=0.000;QD=13.89;ReadPosRankSum=-1.084;SOR=0.833	GT:AD:DP:GQ:PL	0/1:365,317:682:99:9478,0,12914	4	4.99076	3.81368	0.0254466	6.55123	7.5599	0.333424
d225006	Ib	CG44245	FBgn0265180	1	2R:21212006	0.462908	2R	21212006	C	G	CG	FALSE	674	13461.6	AC=1;AF=0.500;AN=2;BaseQRankSum=-2.675;DP=674;ExcessHet=3.0103;FS=1.779;MLEAC=1;MLEAF=0.500;MQ=60.00;MQRankSum=0.000;QD=19.97;ReadPosRankSum=-1.690;SOR=0.839	GT:AD:DP:GQ:PL	0/1:362,312:674:99:13469,0,15820	4	4.99076	3.81368	0.0254466	6.55123	7.5599	0.333424
d225006	Ib	CG44245	FBgn0265180	1	2R:21212018	0.441008	2R	21212018	G	A	GA	FALSE	874	14842.6	AC=1;AF=0.500;AN=2;BaseQRankSum=-9.644;DP=874;ExcessHet=3.0103;FS=4.078;MLEAC=1;MLEAF=0.500;MQ=60.00;MQRankSum=0.000;QD=17.00;ReadPosRankSum=1.469;SOR=0.960	GT:AD:DP:GQ:PL	0/1:488,385:873:99:14850,0,15069	4	4.99076	3.81368	0.0254466	6.55123	7.5599	0.333424
d225006	Ib	CG44245	FBgn0265180	1	2R:21212024	0.418577	2R	21212024	C	T	CT	FALSE	829	13532.6	AC=1;AF=0.500;AN=2;BaseQRankSum=-9.234;DP=829;ExcessHet=3.0103;FS=0.528;MLEAC=1;MLEAF=0.500;MQ=60.00;MQRankSum=0.000;QD=16.32;ReadPosRankSum=4.062;SOR=0.683	GT:AD:DP:GQ:PL	0/1:482,347:829:99:13540,0,20201	4	4.99076	3.81368	0.0254466	6.55123	7.5599	0.333424
d225006	Ib	CG44245	FBgn0265180	1	2R:21212195	0.462121	2R	21212195	T	C	TC	FALSE	661	11048.6	AC=1;AF=0.500;AN=2;BaseQRankSum=12.932;DP=661;ExcessHet=3.0103;FS=2.452;MLEAC=1;MLEAF=0.500;MQ=60.00;MQRankSum=0.000;QD=16.74;ReadPosRankSum=1.603;SOR=0.624	GT:AD:DP:GQ:PL	0/1:355,305:660:99:11056,0,13261	4	4.99076	3.81368	0.0254466	6.55123	7.5599	0.333424
d225006	Ib	CG44245	FBgn0265180	1	2R:21212213	0.397472	2R	21212213	T	G	TG	FALSE	712	11128.6	AC=1;AF=0.500;AN=2;BaseQRankSum=13.358;DP=712;ExcessHet=3.0103;FS=1.158;MLEAC=1;MLEAF=0.500;MQ=60.00;MQRankSum=0.000;QD=15.63;ReadPosRankSum=1.952;SOR=0.808	GT:AD:DP:GQ:PL	0/1:429,283:712:99:11136,0,17536	4	4.99076	3.81368	0.0254466	6.55123	7.5599	0.333424
d225006	Ib	CG44245	FBgn0265180	1	2R:21212222	0.409987	2R	21212222	T	C	TC	FALSE	762	11382.6	AC=1;AF=0.500;AN=2;BaseQRankSum=2.512;DP=762;ExcessHet=3.0103;FS=0.000;MLEAC=1;MLEAF=0.500;MQ=60.00;MQRankSum=0.000;QD=14.96;ReadPosRankSum=-2.448;SOR=0.736	GT:AD:DP:GQ:PL	0/1:449,312:761:99:11390,0,17535	4	4.99076	3.81368	0.0254466	6.55123	7.5599	0.333424
d225006	Ib	CG44245	FBgn0265180	1	2R:21212387	0.521368	2R	21212387	T	C	TC	FALSE	938	14973.6	AC=1;AF=0.500;AN=2;BaseQRankSum=17.164;DP=938;ExcessHet=3.0103;FS=0.000;MLEAC=1;MLEAF=0.500;MQ=60.00;MQRankSum=0.000;QD=16.00;ReadPosRankSum=-0.540;SOR=0.683	GT:AD:DP:GQ:PL	0/1:448,488:936:99:14981,0,12065	4	4.99076	3.81368	0.0254466	6.55123	7.5599	0.333424
d225006	Ib	CG44245	FBgn0265180	1	2R:21212711	0.429897	2R	21212711	A	T	AT	FALSE	970	15201.6	AC=1;AF=0.500;AN=2;BaseQRankSum=4.951;DP=970;ExcessHet=3.0103;FS=0.000;MLEAC=1;MLEAF=0.500;MQ=60.00;MQRankSum=0.000;QD=15.67;ReadPosRankSum=-2.577;SOR=0.732	GT:AD:DP:GQ:PL	0/1:553,417:970:99:15209,0,21633	4	4.99076	3.81368	0.0254466	6.55123	7.5599	0.333424
d225006	Ib	CG44245	FBgn0265180	1	2R:21212724	0.456989	2R	21212724	A	C	AC	FALSE	930	15757.6	AC=1;AF=0.500;AN=2;BaseQRankSum=9.982;DP=930;ExcessHet=3.0103;FS=1.100;MLEAC=1;MLEAF=0.500;MQ=60.00;MQRankSum=0.000;QD=16.94;ReadPosRankSum=-2.988;SOR=0.802	GT:AD:DP:GQ:PL	0/1:505,425:930:99:15765,0,20065	4	4.99076	3.81368	0.0254466	6.55123	7.5599	0.333424
d225006	Ib	dom	FBgn0020306	1	2R:21341690	0.212766	2R	21341690	C	A	CA	FALSE	47	300.6	AC=1;AF=0.500;AN=2;BaseQRankSum=-2.240;DP=47;ExcessHet=3.0103;FS=0.000;MLEAC=1;MLEAF=0.500;MQ=60.00;MQRankSum=0.000;QD=6.40;ReadPosRankSum=1.412;SOR=0.787	GT:AD:DP:GQ:PL	0/1:37,10:47:99:308,0,1523	4	1.98099	1.43254	0.0824804	0.634974	0.642197	0.333424
d225006	Ib	Ip6k	FBgn0034644	1	2R:21646418	0.545455	2R	21646418	G	A	GA	FALSE	11	164.6	AC=1;AF=0.500;AN=2;BaseQRankSum=-3.067;DP=11;ExcessHet=3.0103;FS=0.000;MLEAC=1;MLEAF=0.500;MQ=60.00;MQRankSum=0.000;QD=14.96;ReadPosRankSum=-0.092;SOR=0.446	GT:AD:DP:GQ:PL	0/1:5,6:11:99:172,0,160	4	2.67798	3.39051	0.270895	1.39074	1.26249	0.333424
d225006	Ib	Tbp	FBgn0003687	-1	2R:21686193	0.833333	2R	21686193	C	T	GA	FALSE	36	828.6	AC=1;AF=0.500;AN=2;BaseQRankSum=-2.673;DP=36;ExcessHet=3.0103;FS=5.093;MLEAC=1;MLEAF=0.500;MQ=60.00;MQRankSum=0.000;QD=23.02;ReadPosRankSum=0.766;SOR=3.258	GT:AD:DP:GQ:PL	0/1:6,30:36:97:836,0,97	4	0.838027	1.20172	0.427219	0.526485	0.617839	0.333424
d225006	Ib	bonsai	FBgn0026261	1	2R:22638349	0.692308	2R	22638349	C	T	CT	FALSE	13	358.6	AC=1;AF=0.500;AN=2;BaseQRankSum=1.431;DP=13;ExcessHet=3.0103;FS=6.929;MLEAC=1;MLEAF=0.500;MQ=60.00;MQRankSum=0.000;QD=27.58;SOR=3.056	GT:AD:DP:GQ:PL	0/1:4,9:13:99:366,0,130	4	2.83839	2.59942	0.957558	1.58577	1.84416	0.333424
d225006	Ib	CG3500	FBgn0034849	-1	2R:23356414	0.515152	2R	23356414	A	G	TC	FALSE	33	553.6	AC=1;AF=0.500;AN=2;BaseQRankSum=4.553;DP=33;ExcessHet=3.0103;FS=17.777;MLEAC=1;MLEAF=0.500;MQ=60.00;MQRankSum=0.000;QD=16.78;ReadPosRankSum=-2.157;SOR=0.019	GT:AD:DP:GQ:PL	0/1:16,17:33:99:561,0,396	4	3.28036	3.53409	0.812059	4.001	3.98018	0.333424
d225006	Ib	CG3500	FBgn0034849	-1	2R:23356936	0.391304	2R	23356936	G	A	CT	FALSE	46	300.6	AC=1;AF=0.500;AN=2;BaseQRankSum=-4.530;DP=46;ExcessHet=3.0103;FS=1.206;MLEAC=1;MLEAF=0.500;MQ=60.00;MQRankSum=0.000;QD=6.53;ReadPosRankSum=-1.319;SOR=0.406	GT:AD:DP:GQ:PL	0/1:28,18:46:99:308,0,939	4	3.28036	3.53409	0.812059	4.001	3.98018	0.333424
d225006	Ib	CG3500	FBgn0034849	-1	2R:23356967	0.425	2R	23356967	G	A	CT	FALSE	40	451.6	AC=1;AF=0.500;AN=2;BaseQRankSum=-2.074;DP=40;ExcessHet=3.0103;FS=1.252;MLEAC=1;MLEAF=0.500;MQ=60.00;MQRankSum=0.000;QD=11.29;ReadPosRankSum=0.467;SOR=0.616	GT:AD:DP:GQ:PL	0/1:23,17:40:99:459,0,693	4	3.28036	3.53409	0.812059	4.001	3.98018	0.333424
d225006	Ib	CG3500	FBgn0034849	-1	2R:23356979	0.394737	2R	23356979	G	A	CT	FALSE	38	398.6	AC=1;AF=0.500;AN=2;BaseQRankSum=-4.835;DP=38;ExcessHet=3.0103;FS=0.000;MLEAC=1;MLEAF=0.500;MQ=60.00;MQRankSum=0.000;QD=10.49;ReadPosRankSum=0.988;SOR=0.577	GT:AD:DP:GQ:PL	0/1:23,15:38:99:406,0,745	4	3.28036	3.53409	0.812059	4.001	3.98018	0.333424
d225006	Ib	CG3500	FBgn0034849	-1	2R:23357063	0.403509	2R	23357063	G	T	CA	FALSE	57	658.6	AC=1;AF=0.500;AN=2;BaseQRankSum=-5.525;DP=57;ExcessHet=3.0103;FS=0.000;MLEAC=1;MLEAF=0.500;MQ=60.00;MQRankSum=0.000;QD=11.55;ReadPosRankSum=-0.769;SOR=0.582	GT:AD:DP:GQ:PL	0/1:34,23:57:99:666,0,1160	4	3.28036	3.53409	0.812059	4.001	3.98018	0.333424
d225006	Ib	Mtmr6	FBgn0028497	-1	2R:23390218	0.214286	2R	23390218	C	T	GA	FALSE	14	33.6	AC=1;AF=0.500;AN=2;BaseQRankSum=-2.277;DP=14;ExcessHet=3.0103;FS=12.601;MLEAC=1;MLEAF=0.500;MQ=60.00;MQRankSum=0.000;QD=2.40;ReadPosRankSum=-0.313;SOR=2.785	GT:AD:DP:GQ:PL	0/1:11,3:14:41:41,0,386	4	3.54327	3.12972	0.708751	0.578475	0.549823	0.333424
d225006	Ib	CG4612	FBgn0035016	-1	2R:24524064	0.416667	2R	24524064	C	T	GA	FALSE	24	248.6	AC=1;AF=0.500;AN=2;BaseQRankSum=0.363;DP=24;ExcessHet=3.0103;FS=6.701;MLEAC=1;MLEAF=0.500;MQ=60.00;MQRankSum=0.000;QD=10.36;ReadPosRankSum=-0.619;SOR=1.472	GT:AD:DP:GQ:PL	0/1:14,10:24:99:256,0,357	4	5.78401	5.60528	0.826696	1.76623	1.27661	0.333424
d225006	Ib	Cndp2	FBgn0287767	1	2R:5699203	0.721311	2R	5699203	A	T	AT	FALSE	61	1249.6	AC=1;AF=0.500;AN=2;BaseQRankSum=-3.149;DP=61;ExcessHet=3.0103;FS=0.000;MLEAC=1;MLEAF=0.500;MQ=60.00;MQRankSum=0.000;QD=20.49;ReadPosRankSum=0.242;SOR=0.688	GT:AD:DP:GQ:PL	0/1:17,44:61:99:1257,0,412	4						0.333424
d225006	Ib	CG14591	FBgn0033054	-1	2R:6036627	1	2R	6036627	C	T	GA	FALSE	12	338.02	AC=2;AF=1.00;AN=2;DP=12;ExcessHet=3.0103;FS=0.000;MLEAC=2;MLEAF=1.00;MQ=60.00;QD=28.17;SOR=2.670	GT:AD:DP:GQ:PL	1/1:0,12:12:36:352,36,0	4	4.47495	4.49171	0.904654	0.132465	0.0680559	0.333424
d225006	Ib	EcR	FBgn0000546	-1	2R:6092515	0.136364	2R	6092515	T	A	AT	FALSE	22	100.6	AC=1;AF=0.500;AN=2;BaseQRankSum=1.535;DP=22;ExcessHet=3.0103;FS=12.632;MLEAC=1;MLEAF=0.500;MQ=60.00;MQRankSum=0.000;QD=4.57;ReadPosRankSum=-2.644;SOR=2.788	GT:AD:DP:GQ:PL	0/1:19,3:22:99:108,0,3465	4	4.61238	4.32981	0.548578	2.46896	2.59811	0.333424
d225006	Ib	Cul1	FBgn0015509	1	2R:7920422	0.388889	2R	7920422	C	G	CG	FALSE	18	198.6	AC=1;AF=0.500;AN=2;BaseQRankSum=1.726;DP=18;ExcessHet=3.0103;FS=4.786;MLEAC=1;MLEAF=0.500;MQ=60.00;MQRankSum=0.000;QD=11.03;ReadPosRankSum=0.682;SOR=0.565	GT:AD:DP:GQ:PL	0/1:11,7:18:99:206,0,297	4	2.08014	2.74507	0.935588	1.24132	1.19352	0.333424
d225006	Ib	CSN4	FBgn0027054	1	2R:7973069	0.852941	2R	7973069	T	C	TC	FALSE	68	1940.6	AC=1;AF=0.500;AN=2;BaseQRankSum=3.984;DP=68;ExcessHet=3.0103;FS=0.000;MLEAC=1;MLEAF=0.500;MQ=60.00;MQRankSum=0.000;QD=28.54;ReadPosRankSum=-0.547;SOR=0.693	GT:AD:DP:GQ:PL	0/1:10,58:68:82:1948,0,82	4	2.71701	2.92813	0.927838	3.57475	3.3122	0.333424
d225006	Ib	udd	FBgn0033261	1	2R:8106926	0.8	2R	8106926	T	A	TA	FALSE	30	903.6	AC=1;AF=0.500;AN=2;BaseQRankSum=-2.424;DP=30;ExcessHet=3.0103;FS=8.522;MLEAC=1;MLEAF=0.500;MQ=60.00;MQRankSum=0.000;QD=30.12;ReadPosRankSum=0.105;SOR=0.051	GT:AD:DP:GQ:PL	0/1:6,24:30:99:911,0,177	4	3.42434	3.53721	0.752761	2.50723	2.72525	0.333424
d225006	Ib	udd	FBgn0033261	1	2R:8106932	0.818182	2R	8106932	C	A	CA	FALSE	22	760.6	AC=1;AF=0.500;AN=2;BaseQRankSum=-2.388;DP=22;ExcessHet=3.0103;FS=5.798;MLEAC=1;MLEAF=0.500;MQ=60.00;MQRankSum=0.000;QD=34.57;ReadPosRankSum=-0.640;SOR=0.086	GT:AD:DP:GQ:PL	0/1:4,18:22:99:768,0,111	4	3.42434	3.53721	0.752761	2.50723	2.72525	0.333424
d225006	Ib	Lpin	FBgn0263593	-1	2R:8137640	0.645833	2R	8137640	C	T	GA	FALSE	48	883.6	AC=1;AF=0.500;AN=2;BaseQRankSum=-1.754;DP=48;ExcessHet=3.0103;FS=2.805;MLEAC=1;MLEAF=0.500;MQ=60.00;MQRankSum=0.000;QD=18.41;ReadPosRankSum=2.173;SOR=1.334	GT:AD:DP:GQ:PL	0/1:17,31:48:99:891,0,415	4	4.39667	5.07773	0.241101	2.14187	1.82211	0.333424
d225006	Ib	pnut	FBgn0013726	1	2R:8238250	0.833333	2R	8238250	C	T	CT	FALSE	12	268.6	AC=1;AF=0.500;AN=2;BaseQRankSum=-2.124;DP=12;ExcessHet=3.0103;FS=10.414;MLEAC=1;MLEAF=0.500;MQ=60.00;MQRankSum=0.000;QD=22.38;ReadPosRankSum=-1.205;SOR=2.209	GT:AD:DP:GQ:PL	0/1:2,10:12:40:276,0,40	4	4.19271	4.26349	0.83449	1.16797	1.53389	0.333424
d225006	Ib	pnut	FBgn0013726	1	2R:8239511	0.673913	2R	8239511	C	T	CT	FALSE	46	793.6	AC=1;AF=0.500;AN=2;BaseQRankSum=-3.279;DP=46;ExcessHet=3.0103;FS=2.843;MLEAC=1;MLEAF=0.500;MQ=60.00;MQRankSum=0.000;QD=17.25;ReadPosRankSum=-0.869;SOR=0.344	GT:AD:DP:GQ:PL	0/1:15,31:46:99:801,0,397	4	4.19271	4.26349	0.83449	1.16797	1.53389	0.333424
d225006	Ib	Lcp4	FBgn0002535	1	2R:8437650	0.844828	2R	8437650	C	G	CG	FALSE	59	1694.6	AC=1;AF=0.500;AN=2;BaseQRankSum=4.002;DP=59;ExcessHet=3.0103;FS=4.269;MLEAC=1;MLEAF=0.500;MQ=60.00;MQRankSum=0.000;QD=29.22;ReadPosRankSum=-3.381;SOR=1.870	GT:AD:DP:GQ:PL	0/1:9,49:58:99:1702,0,114	4	7.22388	6.26609	0.690822	12.4228	14.115	0.333424
d225006	Ib	VhaAC45	FBgn0262515	1	2R:9209488	0.183908	2R	9209488	C	T	CT	FALSE	87	314.6	AC=1;AF=0.500;AN=2;BaseQRankSum=2.920;DP=87;ExcessHet=3.0103;FS=44.578;MLEAC=1;MLEAF=0.500;MQ=60.00;MQRankSum=0.000;QD=3.62;ReadPosRankSum=-5.253;SOR=5.669	GT:AD:DP:GQ:PL	0/1:71,16:87:99:322,0,2761	4	6.74784	6.52566	0.860581	4.12796	4.48422	0.333424
d225006	Ib	clos	FBgn0261016	-1	2R:9587990	0.52381	2R	9587990	A	C	TG	FALSE	26	293.6	AC=1;AF=0.500;AN=2;BaseQRankSum=2.228;DP=26;ExcessHet=3.0103;FS=0.000;MLEAC=1;MLEAF=0.500;MQ=60.00;MQRankSum=0.000;QD=13.98;ReadPosRankSum=-1.630;SOR=0.223	GT:AD:DP:GQ:PL	0/1:10,11:21:99:301,0,277	4	0.0749458	0.125458	0.829861	0.0728188	0.0575285	0.333424
d225006	Ib	clos	FBgn0261016	-1	2R:9587993	0.4	2R	9587993	C	A	GT	FALSE	18	113.6	AC=1;AF=0.500;AN=2;BaseQRankSum=-1.775;DP=18;ExcessHet=3.0103;FS=3.979;MLEAC=1;MLEAF=0.500;MQ=60.00;MQRankSum=0.000;QD=7.57;ReadPosRankSum=-0.239;SOR=0.086	GT:AD:DP:GQ:PL	0/1:9,6:15:99:121,0,262	4	0.0749458	0.125458	0.829861	0.0728188	0.0575285	0.333424
d225006	Ib	sqa	FBgn0259678	-1	2R:9719090	0.211538	2R	9719090	C	T	GA	FALSE	52	166.6	AC=1;AF=0.500;AN=2;BaseQRankSum=-1.675;DP=52;ExcessHet=3.0103;FS=2.985;MLEAC=1;MLEAF=0.500;MQ=60.00;MQRankSum=0.000;QD=3.20;ReadPosRankSum=1.977;SOR=1.244	GT:AD:DP:GQ:PL	0/1:41,11:52:99:174,0,1200	4	0.884858	1.20865	0.955242	3.63639	3.51006	0.333424
d225006	Ib	Apt1	FBgn0042138	1	3L:11628404	0.162162	3L	11628404	C	A	CA	FALSE	74	288.6	AC=1;AF=0.500;AN=2;BaseQRankSum=-3.748;DP=74;ExcessHet=3.0103;FS=47.913;MLEAC=1;MLEAF=0.500;MQ=60.00;MQRankSum=0.000;QD=3.90;ReadPosRankSum=-3.329;SOR=5.132	GT:AD:DP:GQ:PL	0/1:62,12:74:99:296,0,2508	4	7.03967	7.08104	0.899746	3.39757	3.11187	0.333424
d225006	Ib	Apt1	FBgn0042138	1	3L:11629925	0.2	3L	11629925	G	T	GT	FALSE	35	103.6	AC=1;AF=0.500;AN=2;BaseQRankSum=-3.784;DP=35;ExcessHet=3.0103;FS=0.000;MLEAC=1;MLEAF=0.500;MQ=60.00;MQRankSum=0.000;QD=2.96;ReadPosRankSum=-0.482;SOR=0.283	GT:AD:DP:GQ:PL	0/1:28,7:35:99:111,0,944	4	7.03967	7.08104	0.899746	3.39757	3.11187	0.333424
d225006	Ib	RpS4	FBgn0011284	1	3L:13043906	0.733333	3L	13043906	A	C	AC	FALSE	16	248.87	AC=1;AF=0.500;AN=2;BaseQRankSum=2.189;DP=16;ExcessHet=3.0103;FS=0.000;MLEAC=1;MLEAF=0.500;MQ=60.00;MQRankSum=0.000;QD=16.59;ReadPosRankSum=0.524;SOR=0.495	GT:AD:DP:GQ:PL	0/1:4,11:15:52:256,0,52	4	11.7053	11.6919	0.574608	10.8292	10.6055	0.333424
d225006	Ib	RpS4	FBgn0011284	1	3L:13043908	0.714286	3L	13043908	C	A	CA	FALSE	14	325.6	AC=1;AF=0.500;AN=2;BaseQRankSum=1.637;DP=14;ExcessHet=3.0103;FS=0.000;MLEAC=1;MLEAF=0.500;MQ=60.00;MQRankSum=0.000;QD=23.26;ReadPosRankSum=1.911;SOR=1.765	GT:AD:DP:GQ:PL	0/1:4,10:14:46:333,0,46	4	11.7053	11.6919	0.574608	10.8292	10.6055	0.333424
d225006	Ib	RpS4	FBgn0011284	1	3L:13043910	0.75	3L	13043910	C	A	CA	FALSE	12	249.6	AC=1;AF=0.500;AN=2;BaseQRankSum=-1.691;DP=12;ExcessHet=3.0103;FS=0.000;MLEAC=1;MLEAF=0.500;MQ=60.00;MQRankSum=0.000;QD=20.80;ReadPosRankSum=1.489;SOR=1.981	GT:AD:DP:GQ:PL	0/1:3,9:12:52:257,0,52	4	11.7053	11.6919	0.574608	10.8292	10.6055	0.333424
d225006	Ib	mRpS5	FBgn0287187	1	3L:24542458	0.254902	3L	24542458	G	A	GA	FALSE	51	322.6	AC=1;AF=0.500;AN=2;BaseQRankSum=-1.510;DP=51;ExcessHet=3.0103;FS=1.289;MLEAC=1;MLEAF=0.500;MQ=60.00;MQRankSum=0.000;QD=6.33;ReadPosRankSum=0.380;SOR=0.385	GT:AD:DP:GQ:PL	0/1:38,13:51:99:330,0,1087	4						0.333424
d225006	Ib	CG32264	FBgn0052264	-1	3L:3717404	0.215686	3L	3717404	G	T	CA	FALSE	51	333.6	AC=1;AF=0.500;AN=2;BaseQRankSum=-2.203;DP=51;ExcessHet=3.0103;FS=26.903;MLEAC=1;MLEAF=0.500;MQ=60.00;MQRankSum=0.000;QD=6.54;ReadPosRankSum=1.523;SOR=3.422	GT:AD:DP:GQ:PL	0/1:40,11:51:99:341,0,1659	4	3.4169	3.8072	0.084539	3.09462	2.70509	0.333424
d225006	Ib	CG32264	FBgn0052264	-1	3L:3717406	0.232558	3L	3717406	A	C	TG	FALSE	43	333.6	AC=1;AF=0.500;AN=2;BaseQRankSum=-0.342;DP=43;ExcessHet=3.0103;FS=25.674;MLEAC=1;MLEAF=0.500;MQ=60.00;MQRankSum=0.000;QD=7.76;ReadPosRankSum=1.291;SOR=3.230	GT:AD:DP:GQ:PL	0/1:33,10:43:99:341,0,1659	4	3.4169	3.8072	0.084539	3.09462	2.70509	0.333424
d225006	Ib	shep	FBgn0052423	-1	3L:5161349	0.19403	3L	5161349	C	T	GA	FALSE	67	224.6	AC=1;AF=0.500;AN=2;BaseQRankSum=-0.064;DP=67;ExcessHet=3.0103;FS=18.703;MLEAC=1;MLEAF=0.500;MQ=60.00;MQRankSum=0.000;QD=3.35;ReadPosRankSum=-0.987;SOR=4.119	GT:AD:DP:GQ:PL	0/1:54,13:67:99:232,0,1672	4	6.99393	8.01435	8.40398e-09	4.12452	3.59474	0.333424
d225006	Ib	Sh3beta	FBgn0035772	-1	3L:7367639	0.147059	3L	7367639	C	T	GA	FALSE	68	134.6	AC=1;AF=0.500;AN=2;BaseQRankSum=-1.047;DP=68;ExcessHet=3.0103;FS=1.277;MLEAC=1;MLEAF=0.500;MQ=60.00;MQRankSum=0.000;QD=1.98;ReadPosRankSum=-0.254;SOR=0.917	GT:AD:DP:GQ:PL	0/1:58,10:68:99:142,0,1819	4	6.45063	7.27585	0.0684253	4.32621	3.74864	0.333424
d225006	Ib	rhea	FBgn0260442	1	3L:8562736	0.1875	3L	8562736	G	A	GA	FALSE	16	79.6	AC=1;AF=0.500;AN=2;BaseQRankSum=-1.264;DP=16;ExcessHet=3.0103;FS=6.690;MLEAC=1;MLEAF=0.500;MQ=60.00;MQRankSum=0.000;QD=4.98;ReadPosRankSum=-2.091;SOR=0.868	GT:AD:DP:GQ:PL	0/1:13,3:16:87:87,0,537	4	6.24241	6.09779	0.880478	2.31054	2.09284	0.333424
d225006	Ib	RpS25	FBgn0086472	-1	3R:11215417	0.111111	3R	11215417	C	G	GC	FALSE	105	43.6	AC=1;AF=0.500;AN=2;BaseQRankSum=-1.066;DP=105;ExcessHet=3.0103;FS=0.000;MLEAC=1;MLEAF=0.500;MQ=60.00;MQRankSum=0.000;QD=0.44;ReadPosRankSum=-1.226;SOR=0.158	GT:AD:DP:GQ:PL	0/1:88,11:99:51:51,0,3050	4	13.0129	12.8785	0.0374491	13.0233	12.9358	0.333424
d225006	Ib	Fas1	FBgn0285925	1	3R:16631728	0.261905	3R	16631728	G	A	GA	FALSE	42	334.6	AC=1;AF=0.500;AN=2;BaseQRankSum=-2.643;DP=42;ExcessHet=3.0103;FS=19.130;MLEAC=1;MLEAF=0.500;MQ=60.00;MQRankSum=0.000;QD=7.97;ReadPosRankSum=-4.280;SOR=3.432	GT:AD:DP:GQ:PL	0/1:31,11:42:99:342,0,1269	4	6.18665	6.29914	0.632161	0.987396	1.30282	0.333424
d225006	Ib	CCT3	FBgn0015019	1	3R:16648753	0.142857	3R	16648753	C	G	CG	FALSE	56	74.6	AC=1;AF=0.500;AN=2;BaseQRankSum=0.533;DP=56;ExcessHet=3.0103;FS=21.011;MLEAC=1;MLEAF=0.500;MQ=60.00;MQRankSum=0.000;QD=1.33;ReadPosRankSum=1.433;SOR=4.407	GT:AD:DP:GQ:PL	0/1:48,8:56:82:82,0,1024	4	5.71212	6.18949	0.280711	2.89667	2.79005	0.333424
d225006	Ib	Xrp1	FBgn0261113	1	3R:18918473	0.416667	3R	18918473	T	G	TG	FALSE	24	262.6	AC=1;AF=0.500;AN=2;BaseQRankSum=1.095;DP=24;ExcessHet=3.0103;FS=10.209;MLEAC=1;MLEAF=0.500;MQ=60.00;MQRankSum=0.000;QD=10.94;ReadPosRankSum=-0.264;SOR=1.437	GT:AD:DP:GQ:PL	0/1:14,10:24:99:270,0,402	4	6.93525	6.63308	0.99582	5.49922	5.49918	0.333424
d225006	Ib	Xrp1	FBgn0261113	1	3R:18920813	0.7	3R	18920813	C	T	CT	FALSE	30	664.6	AC=1;AF=0.500;AN=2;BaseQRankSum=0.093;DP=30;ExcessHet=3.0103;FS=3.568;MLEAC=1;MLEAF=0.500;MQ=60.00;MQRankSum=0.000;QD=22.15;ReadPosRankSum=0.640;SOR=0.416	GT:AD:DP:GQ:PL	0/1:9,21:30:99:672,0,233	4	6.93525	6.63308	0.99582	5.49922	5.49918	0.333424
d225006	Ib	CG42613	FBgn0261262	1	3R:18931199	0.310345	3R	18931199	A	C	AC	FALSE	29	255.6	AC=1;AF=0.500;AN=2;BaseQRankSum=3.341;DP=29;ExcessHet=3.0103;FS=17.842;MLEAC=1;MLEAF=0.500;MQ=60.00;MQRankSum=0.000;QD=8.81;ReadPosRankSum=0.335;SOR=0.382	GT:AD:DP:GQ:PL	0/1:20,9:29:99:263,0,565	4	3.85208	4.55131	0.161142	0.0438153	0.0533868	0.333424
d225006	Ib	Nsun5	FBgn0259704	-1	3R:19162194	0.612903	3R	19162194	C	T	GA	FALSE	31	454.6	AC=1;AF=0.500;AN=2;BaseQRankSum=-2.122;DP=31;ExcessHet=3.0103;FS=0.000;MLEAC=1;MLEAF=0.500;MQ=60.00;MQRankSum=0.000;QD=14.66;ReadPosRankSum=-0.540;SOR=0.693	GT:AD:DP:GQ:PL	0/1:12,19:31:99:462,0,307	4	1.44057	0.932231	0.274227	1.03784	1.2067	0.333424
d225006	Ib	vib	FBgn0267975	-1	3R:19217980	0.465116	3R	19217980	A	G	TC	FALSE	43	622.6	AC=1;AF=0.500;AN=2;BaseQRankSum=2.949;DP=43;ExcessHet=3.0103;FS=21.076;MLEAC=1;MLEAF=0.500;MQ=60.00;MQRankSum=0.000;QD=14.48;ReadPosRankSum=-1.406;SOR=0.390	GT:AD:DP:GQ:PL	0/1:23,20:43:99:630,0,638	4	5.02601	5.14846	0.946513	3.41525	3.2449	0.333424
d225006	Ib	RpS30	FBgn0038834	1	3R:20851427	0.485294	3R	20851427	T	C	TC	FALSE	71	395.6	AC=1;AF=0.500;AN=2;BaseQRankSum=2.831;DP=71;ExcessHet=3.0103;FS=9.410;MLEAC=1;MLEAF=0.500;MQ=60.00;MQRankSum=0.000;QD=5.82;ReadPosRankSum=0.268;SOR=3.375	GT:AD:DP:GQ:PL	0/1:35,33:68:99:403,0,926	4	12.1917	12.0864	0.343283	11.6581	11.5136	0.333424
d225006	Ib	CG42390	FBgn0259736	1	3R:22132975	0.421053	3R	22132975	C	T	CT	FALSE	19	181.6	AC=1;AF=0.500;AN=2;BaseQRankSum=-1.631;DP=19;ExcessHet=3.0103;FS=1.984;MLEAC=1;MLEAF=0.500;MQ=60.00;MQRankSum=0.000;QD=9.56;ReadPosRankSum=-2.038;SOR=1.609	GT:AD:DP:GQ:PL	0/1:11,8:19:99:189,0,341	4	0.561251	0.650738	0.563698	2.86774	2.63284	0.333424
d225006	Ib	Cow	FBgn0039054	-1	3R:23075169	0.925926	3R	23075169	C	T	GA	FALSE	27	1016.66	AC=1;AF=0.500;AN=2;BaseQRankSum=-1.694;DP=27;ExcessHet=3.0103;FS=3.174;MLEAC=1;MLEAF=0.500;MQ=60.00;MQRankSum=0.000;QD=34.37;ReadPosRankSum=-0.093;SOR=0.240	GT:AD:DP:GQ:PL	0/1:2,25:27:9:1024,0,9	4	6.07048	6.14794	0.757327	0.0371922	0.0664222	0.333424
d225006	Ib	Cow	FBgn0039054	-1	3R:23075200	0.966667	3R	23075200	T	A	AT	FALSE	30	753.03	AC=2;AF=1.00;AN=2;BaseQRankSum=-0.971;DP=30;ExcessHet=3.0103;FS=3.632;MLEAC=2;MLEAF=1.00;MQ=60.00;MQRankSum=0.000;QD=25.10;ReadPosRankSum=0.812;SOR=0.773	GT:AD:DP:GQ:PL	1/1:1,29:30:52:767,52,0	4	6.07048	6.14794	0.757327	0.0371922	0.0664222	0.333424
d225006	Ib	Cow	FBgn0039054	-1	3R:23075298	0.9375	3R	23075298	C	T	GA	FALSE	16	394.2	AC=2;AF=1.00;AN=2;BaseQRankSum=-1.544;DP=16;ExcessHet=3.0103;FS=0.000;MLEAC=1;MLEAF=0.500;MQ=60.00;MQRankSum=0.000;QD=24.64;ReadPosRankSum=-0.217;SOR=0.275	GT:AD:DP:GQ:PL	1/1:1,15:16:8:407,8,0	4	6.07048	6.14794	0.757327	0.0371922	0.0664222	0.333424
d225006	Ib	CenB1A	FBgn0039056	1	3R:23123735	0.727273	3R	23123735	G	A	GA	FALSE	67	1746.6	AC=1;AF=0.500;AN=2;BaseQRankSum=-4.316;DP=67;ExcessHet=3.0103;FS=19.074;MLEAC=1;MLEAF=0.500;MQ=60.00;MQRankSum=0.000;QD=26.46;ReadPosRankSum=-0.043;SOR=1.570	GT:AD:DP:GQ:PL	0/1:18,48:66:99:1754,0,562	4	1.26468	1.57519	0.830604	0.899077	0.886322	0.333424
d225006	Ib	CenB1A	FBgn0039056	1	3R:23123759	0.701754	3R	23123759	T	C	TC	FALSE	58	1586.6	AC=1;AF=0.500;AN=2;BaseQRankSum=4.287;DP=58;ExcessHet=3.0103;FS=6.197;MLEAC=1;MLEAF=0.500;MQ=60.00;MQRankSum=0.000;QD=27.84;ReadPosRankSum=0.332;SOR=1.616	GT:AD:DP:GQ:PL	0/1:17,40:57:99:1594,0,554	4	1.26468	1.57519	0.830604	0.899077	0.886322	0.333424
d225006	Ib	CenB1A	FBgn0039056	1	3R:23124170	0.69697	3R	23124170	G	A	GA	FALSE	33	683.6	AC=1;AF=0.500;AN=2;BaseQRankSum=-2.249;DP=33;ExcessHet=3.0103;FS=2.833;MLEAC=1;MLEAF=0.500;MQ=60.00;MQRankSum=0.000;QD=20.72;ReadPosRankSum=1.777;SOR=1.839	GT:AD:DP:GQ:PL	0/1:10,23:33:99:691,0,250	4	1.26468	1.57519	0.830604	0.899077	0.886322	0.333424
d225006	Ib	cnc	FBgn0262975	-1	3R:23186349	1	3R	23186349	C	T	GA	FALSE	12	379.02	AC=2;AF=1.00;AN=2;DP=12;ExcessHet=3.0103;FS=0.000;MLEAC=2;MLEAF=1.00;MQ=60.00;QD=31.59;SOR=1.981	GT:AD:DP:GQ:PL	1/1:0,12:12:36:393,36,0	4	3.82387	4.59475	0.0116133	4.09835	3.88656	0.333424
d225006	Ib	cnc	FBgn0262975	-1	3R:23186863	1	3R	23186863	T	G	AC	FALSE	21	742.03	AC=2;AF=1.00;AN=2;DP=21;ExcessHet=3.0103;FS=0.000;MLEAC=2;MLEAF=1.00;MQ=60.00;QD=29.43;SOR=0.990	GT:AD:DP:GQ:PL	1/1:0,21:21:63:756,63,0	4	3.82387	4.59475	0.0116133	4.09835	3.88656	0.333424
d225006	Ib	cnc	FBgn0262975	-1	3R:23186929	1	3R	23186929	T	A	AT	FALSE	11	449.02	AC=2;AF=1.00;AN=2;DP=11;ExcessHet=3.0103;FS=0.000;MLEAC=2;MLEAF=1.00;MQ=60.00;QD=32.76;SOR=1.270	GT:AD:DP:GQ:PL	1/1:0,11:11:33:463,33,0	4	3.82387	4.59475	0.0116133	4.09835	3.88656	0.333424
d225006	Ib	cnc	FBgn0262975	-1	3R:23187339	0.75	3R	23187339	G	A	CT	FALSE	24	487.6	AC=1;AF=0.500;AN=2;BaseQRankSum=-2.083;DP=24;ExcessHet=3.0103;FS=1.770;MLEAC=1;MLEAF=0.500;MQ=60.00;MQRankSum=0.000;QD=20.32;ReadPosRankSum=-0.406;SOR=1.179	GT:AD:DP:GQ:PL	0/1:6,18:24:99:495,0,130	4	3.82387	4.59475	0.0116133	4.09835	3.88656	0.333424
d225006	Ib	ATPsynCF6	FBgn0016119	-1	3R:23355288	0.105882	3R	23355288	C	T	GA	FALSE	170	72.6	AC=1;AF=0.500;AN=2;BaseQRankSum=-5.092;DP=170;ExcessHet=3.0103;FS=0.000;MLEAC=1;MLEAF=0.500;MQ=60.00;MQRankSum=0.000;QD=0.43;ReadPosRankSum=2.827;SOR=0.272	GT:AD:DP:GQ:PL	0/1:152,18:170:80:80,0,5340	4	9.01907	8.99728	0.563116	8.34196	8.52202	0.333424
d225006	Ib	ATPsynCF6	FBgn0016119	-1	3R:23355404	0.603261	3R	23355404	C	T	GA	FALSE	737	14601.6	AC=1;AF=0.500;AN=2;BaseQRankSum=-10.536;DP=737;ExcessHet=3.0103;FS=0.000;MLEAC=1;MLEAF=0.500;MQ=60.00;MQRankSum=0.000;QD=19.84;ReadPosRankSum=-0.941;SOR=0.639	GT:AD:DP:GQ:PL	0/1:292,444:736:99:14609,0,10266	4	9.01907	8.99728	0.563116	8.34196	8.52202	0.333424
d225006	Ib	ATPsynCF6	FBgn0016119	-1	3R:23355666	0.611511	3R	23355666	C	T	GA	FALSE	836	14836.6	AC=1;AF=0.500;AN=2;BaseQRankSum=-14.681;DP=836;ExcessHet=3.0103;FS=0.000;MLEAC=1;MLEAF=0.500;MQ=60.00;MQRankSum=0.000;QD=17.79;ReadPosRankSum=1.105;SOR=0.685	GT:AD:DP:GQ:PL	0/1:324,510:834:99:14844,0,8881	4	9.01907	8.99728	0.563116	8.34196	8.52202	0.333424
d225006	Ib	ATPsynCF6	FBgn0016119	-1	3R:23356022	0.418605	3R	23356022	T	G	AC	FALSE	43	384.6	AC=1;AF=0.500;AN=2;BaseQRankSum=-0.472;DP=43;ExcessHet=3.0103;FS=10.837;MLEAC=1;MLEAF=0.500;MQ=60.00;MQRankSum=0.000;QD=8.94;ReadPosRankSum=1.722;SOR=0.074	GT:AD:DP:GQ:PL	0/1:25,18:43:99:392,0,667	4	9.01907	8.99728	0.563116	8.34196	8.52202	0.333424
d225006	Ib	Sec13	FBgn0024509	1	3R:23357632	0.448276	3R	23357632	T	G	TG	FALSE	58	814.6	AC=1;AF=0.500;AN=2;BaseQRankSum=5.619;DP=58;ExcessHet=3.0103;FS=1.139;MLEAC=1;MLEAF=0.500;MQ=60.00;MQRankSum=0.000;QD=14.04;ReadPosRankSum=1.017;SOR=0.456	GT:AD:DP:GQ:PL	0/1:32,26:58:99:822,0,968	4	3.99691	3.71929	0.929505	3.0338	3.04866	0.333424
d225006	Ib	Sec13	FBgn0024509	1	3R:23357786	0.343434	3R	23357786	T	C	TC	FALSE	99	1014.6	AC=1;AF=0.500;AN=2;BaseQRankSum=6.595;DP=99;ExcessHet=3.0103;FS=1.705;MLEAC=1;MLEAF=0.500;MQ=60.00;MQRankSum=0.000;QD=10.25;ReadPosRankSum=-0.344;SOR=0.735	GT:AD:DP:GQ:PL	0/1:65,34:99:99:1022,0,1818	4	3.99691	3.71929	0.929505	3.0338	3.04866	0.333424
d225006	Ib	Sec13	FBgn0024509	1	3R:23358058	0.35	3R	23358058	G	A	GA	FALSE	80	597.6	AC=1;AF=0.500;AN=2;BaseQRankSum=-6.165;DP=80;ExcessHet=3.0103;FS=4.630;MLEAC=1;MLEAF=0.500;MQ=60.00;MQRankSum=0.000;QD=7.47;ReadPosRankSum=-2.084;SOR=1.270	GT:AD:DP:GQ:PL	0/1:52,28:80:99:605,0,1698	4	3.99691	3.71929	0.929505	3.0338	3.04866	0.333424
d225006	Ib	Sec13	FBgn0024509	1	3R:23358145	0.273684	3R	23358145	T	C	TC	FALSE	95	682.6	AC=1;AF=0.500;AN=2;BaseQRankSum=6.381;DP=95;ExcessHet=3.0103;FS=6.489;MLEAC=1;MLEAF=0.500;MQ=60.00;MQRankSum=0.000;QD=7.19;ReadPosRankSum=-1.868;SOR=1.647	GT:AD:DP:GQ:PL	0/1:69,26:95:99:690,0,1930	4	3.99691	3.71929	0.929505	3.0338	3.04866	0.333424
d225006	Ib	Sec13	FBgn0024509	1	3R:23358229	0.210526	3R	23358229	C	T	CT	FALSE	38	155.6	AC=1;AF=0.500;AN=2;BaseQRankSum=-2.138;DP=38;ExcessHet=3.0103;FS=2.518;MLEAC=1;MLEAF=0.500;MQ=60.00;MQRankSum=0.000;QD=4.09;ReadPosRankSum=-0.036;SOR=1.329	GT:AD:DP:GQ:PL	0/1:30,8:38:99:163,0,936	4	3.99691	3.71929	0.929505	3.0338	3.04866	0.333424
d225006	Ib	RpS3	FBgn0002622	1	3R:23358819	0.363636	3R	23358819	C	T	CT	FALSE	33	236.6	AC=1;AF=0.500;AN=2;BaseQRankSum=-2.161;DP=33;ExcessHet=3.0103;FS=7.994;MLEAC=1;MLEAF=0.500;MQ=60.00;MQRankSum=0.000;QD=7.17;ReadPosRankSum=-0.562;SOR=0.070	GT:AD:DP:GQ:PL	0/1:21,12:33:99:244,0,654	4	11.3972	11.4997	0.982615	10.5923	10.366	0.333424
d225006	Ib	RpS3	FBgn0002622	1	3R:23359255	0.493656	3R	23359255	T	C	TC	FALSE	1659	23578.6	AC=1;AF=0.500;AN=2;BaseQRankSum=6.945;DP=1659;ExcessHet=3.0103;FS=1.107;MLEAC=1;MLEAF=0.500;MQ=60.00;MQRankSum=0.000;QD=14.25;ReadPosRankSum=-0.069;SOR=0.618	GT:AD:DP:GQ:PL	0/1:838,817:1655:99:23586,0,23039	4	11.3972	11.4997	0.982615	10.5923	10.366	0.333424
d225006	Ib	RpS3	FBgn0002622	1	3R:23360107	0.692308	3R	23360107	C	A	CA	FALSE	13	241.6	AC=1;AF=0.500;AN=2;BaseQRankSum=-3.195;DP=13;ExcessHet=3.0103;FS=5.119;MLEAC=1;MLEAF=0.500;MQ=60.00;MQRankSum=0.000;QD=18.58;ReadPosRankSum=0.079;SOR=3.258	GT:AD:DP:GQ:PL	0/1:4,9:13:99:249,0,136	4	11.3972	11.4997	0.982615	10.5923	10.366	0.333424
d225006	Ib	Rpn9	FBgn0028691	-1	3R:23732279	0.581699	3R	23732279	G	A	CT	FALSE	153	2250.6	AC=1;AF=0.500;AN=2;BaseQRankSum=-8.304;DP=153;ExcessHet=3.0103;FS=5.242;MLEAC=1;MLEAF=0.500;MQ=60.00;MQRankSum=0.000;QD=14.71;ReadPosRankSum=0.094;SOR=1.128	GT:AD:DP:GQ:PL	0/1:64,89:153:99:2258,0,1924	4	5.9203	5.87523	0.666956	6.44082	5.85144	0.333424
d225006	Ib	Rpn9	FBgn0028691	-1	3R:23732531	0.525253	3R	23732531	A	T	TA	FALSE	198	2904.6	AC=1;AF=0.500;AN=2;BaseQRankSum=3.560;DP=198;ExcessHet=3.0103;FS=1.104;MLEAC=1;MLEAF=0.500;MQ=60.00;MQRankSum=0.000;QD=14.67;ReadPosRankSum=-1.845;SOR=0.598	GT:AD:DP:GQ:PL	0/1:94,104:198:99:2912,0,2377	4	5.9203	5.87523	0.666956	6.44082	5.85144	0.333424
d225006	Ib	RanBP3	FBgn0039110	-1	3R:23751226	0.6	3R	23751226	C	T	GA	FALSE	20	312.6	AC=1;AF=0.500;AN=2;BaseQRankSum=-0.792;DP=20;ExcessHet=3.0103;FS=2.086;MLEAC=1;MLEAF=0.500;MQ=60.00;MQRankSum=0.000;QD=15.63;ReadPosRankSum=-0.740;SOR=0.330	GT:AD:DP:GQ:PL	0/1:8,12:20:99:320,0,189	4	2.71082	2.78388	0.735096	1.5493	1.5026	0.333424
d225006	Ib	RanBP3	FBgn0039110	-1	3R:23751272	0.714286	3R	23751272	G	A	CT	FALSE	21	430.6	AC=1;AF=0.500;AN=2;BaseQRankSum=-2.199;DP=21;ExcessHet=3.0103;FS=12.155;MLEAC=1;MLEAF=0.500;MQ=60.00;MQRankSum=0.000;QD=20.50;ReadPosRankSum=0.471;SOR=0.026	GT:AD:DP:GQ:PL	0/1:6,15:21:99:438,0,152	4	2.71082	2.78388	0.735096	1.5493	1.5026	0.333424
d225006	Ib	RanBP3	FBgn0039110	-1	3R:23751935	0.473684	3R	23751935	C	A	GT	FALSE	19	242.6	AC=1;AF=0.500;AN=2;BaseQRankSum=-3.764;DP=19;ExcessHet=3.0103;FS=0.000;MLEAC=1;MLEAF=0.500;MQ=60.00;MQRankSum=0.000;QD=12.77;ReadPosRankSum=-0.736;SOR=0.941	GT:AD:DP:GQ:PL	0/1:10,9:19:99:250,0,333	4	2.71082	2.78388	0.735096	1.5493	1.5026	0.333424
d225006	Ib	RanBP3	FBgn0039110	-1	3R:23752091	0.347826	3R	23752091	G	A	CT	FALSE	23	164.6	AC=1;AF=0.500;AN=2;BaseQRankSum=-3.176;DP=23;ExcessHet=3.0103;FS=4.304;MLEAC=1;MLEAF=0.500;MQ=60.00;MQRankSum=0.000;QD=7.16;ReadPosRankSum=-1.652;SOR=0.160	GT:AD:DP:GQ:PL	0/1:15,8:23:99:172,0,466	4	2.71082	2.78388	0.735096	1.5493	1.5026	0.333424
d225006	Ib	Rpt5	FBgn0028684	1	3R:23754154	0.476471	3R	23754154	G	A	GA	FALSE	170	2354.6	AC=1;AF=0.500;AN=2;BaseQRankSum=-7.133;DP=170;ExcessHet=3.0103;FS=0.000;MLEAC=1;MLEAF=0.500;MQ=60.00;MQRankSum=0.000;QD=13.85;ReadPosRankSum=1.512;SOR=0.695	GT:AD:DP:GQ:PL	0/1:89,81:170:99:2362,0,2797	4	5.93216	6.10852	0.925004	5.71526	5.18509	0.333424
d225006	Ib	Hrd3	FBgn0028475	-1	3R:23754868	0.571429	3R	23754868	C	T	GA	FALSE	28	404.6	AC=1;AF=0.500;AN=2;BaseQRankSum=-1.559;DP=28;ExcessHet=3.0103;FS=1.441;MLEAC=1;MLEAF=0.500;MQ=60.00;MQRankSum=0.000;QD=14.45;ReadPosRankSum=0.116;SOR=0.446	GT:AD:DP:GQ:PL	0/1:12,16:28:99:412,0,309	4	1.05802	1.33124	0.658847	1.3177	1.31199	0.333424
d225006	Ib	Hrd3	FBgn0028475	-1	3R:23754957	0.413793	3R	23754957	G	T	CA	FALSE	29	279.6	AC=1;AF=0.500;AN=2;BaseQRankSum=-2.354;DP=29;ExcessHet=3.0103;FS=0.000;MLEAC=1;MLEAF=0.500;MQ=60.00;MQRankSum=0.000;QD=9.64;ReadPosRankSum=0.333;SOR=0.743	GT:AD:DP:GQ:PL	0/1:17,12:29:99:287,0,510	4	1.05802	1.33124	0.658847	1.3177	1.31199	0.333424
d225006	Ib	Pli	FBgn0025574	-1	3R:23860668	0.888889	3R	23860668	A	T	TA	FALSE	18	455.61	AC=1;AF=0.500;AN=2;BaseQRankSum=-0.075;DP=18;ExcessHet=3.0103;FS=0.000;MLEAC=1;MLEAF=0.500;MQ=60.00;MQRankSum=0.000;QD=25.31;ReadPosRankSum=1.057;SOR=1.609	GT:AD:DP:GQ:PL	0/1:2,16:18:15:463,0,15	4	2.52098	3.01329	0.738494	2.01983	2.035	0.333424
d225006	Ib	Gdh	FBgn0001098	-1	3R:23936168	0.571429	3R	23936168	C	G	GC	FALSE	183	3328.6	AC=1;AF=0.500;AN=2;BaseQRankSum=-6.321;DP=183;ExcessHet=3.0103;FS=0.000;MLEAC=1;MLEAF=0.500;MQ=60.00;MQRankSum=0.000;QD=18.29;ReadPosRankSum=0.523;SOR=0.715	GT:AD:DP:GQ:PL	0/1:78,104:182:99:3336,0,2448	4	6.73636	5.26871	0.00814535	4.37474	4.57326	0.333424
d225006	Ib	Gdh	FBgn0001098	-1	3R:23942634	0.722222	3R	23942634	G	A	CT	FALSE	72	1534.6	AC=1;AF=0.500;AN=2;BaseQRankSum=-1.218;DP=72;ExcessHet=3.0103;FS=1.070;MLEAC=1;MLEAF=0.500;MQ=60.00;MQRankSum=0.000;QD=21.31;ReadPosRankSum=-0.587;SOR=0.935	GT:AD:DP:GQ:PL	0/1:20,52:72:99:1542,0,483	4	6.73636	5.26871	0.00814535	4.37474	4.57326	0.333424
d225006	Ib	CG5902	FBgn0039136	1	3R:23987955	0.348485	3R	23987955	G	A	GA	FALSE	66	479.6	AC=1;AF=0.500;AN=2;BaseQRankSum=-4.500;DP=66;ExcessHet=3.0103;FS=1.029;MLEAC=1;MLEAF=0.500;MQ=60.00;MQRankSum=0.000;QD=7.27;ReadPosRankSum=-1.818;SOR=0.865	GT:AD:DP:GQ:PL	0/1:43,23:66:99:487,0,1365	4	4.46095	6.00348	0.0326598	4.02602	3.81232	0.333424
d225006	Ib	Rab7	FBgn0015795	1	3R:23993999	0.626263	3R	23993999	G	A	GA	FALSE	99	1775.6	AC=1;AF=0.500;AN=2;BaseQRankSum=-3.920;DP=99;ExcessHet=3.0103;FS=1.679;MLEAC=1;MLEAF=0.500;MQ=60.00;MQRankSum=0.000;QD=17.94;ReadPosRankSum=-0.740;SOR=0.913	GT:AD:DP:GQ:PL	0/1:37,62:99:99:1783,0,974	4	5.39259	6.11489	0.505856	5.76257	5.43417	0.333424
d225006	Ib	Rab7	FBgn0015795	1	3R:23995450	0.65	3R	23995450	T	C	TC	FALSE	20	361.6	AC=1;AF=0.500;AN=2;BaseQRankSum=1.543;DP=20;ExcessHet=3.0103;FS=1.922;MLEAC=1;MLEAF=0.500;MQ=60.00;MQRankSum=0.000;QD=18.08;ReadPosRankSum=-0.556;SOR=0.283	GT:AD:DP:GQ:PL	0/1:7,13:20:99:369,0,136	4	5.39259	6.11489	0.505856	5.76257	5.43417	0.333424
d225006	Ib	eIF4EHP	FBgn0053100	-1	3R:24107134	1	3R	24107134	G	C	CG	FALSE	11	374.02	AC=2;AF=1.00;AN=2;DP=11;ExcessHet=3.0103;FS=0.000;MLEAC=2;MLEAF=1.00;MQ=60.00;QD=34.00;SOR=0.859	GT:AD:DP:GQ:PL	1/1:0,11:11:33:388,33,0	4	4.76318	5.05264	0.385496	1.71244	1.40936	0.333424
d225006	Ib	CG18428	FBgn0039149	1	3R:24109984	0.904762	3R	24109984	G	T	GT	FALSE	21	476	AC=2;AF=1.00;AN=2;BaseQRankSum=1.697;DP=21;ExcessHet=3.0103;FS=0.000;MLEAC=2;MLEAF=1.00;MQ=60.00;MQRankSum=0.000;QD=22.67;ReadPosRankSum=-0.423;SOR=1.609	GT:AD:DP:GQ:PL	1/1:2,19:21:13:490,13,0	4	4.48188	4.23664	0.944416	2.04254	1.85564	0.333424
d225006	Ib	Sec10	FBgn0266673	1	3R:24137167	0.566667	3R	24137167	C	T	CT	FALSE	30	462.6	AC=1;AF=0.500;AN=2;BaseQRankSum=-0.262;DP=30;ExcessHet=3.0103;FS=24.074;MLEAC=1;MLEAF=0.500;MQ=60.00;MQRankSum=0.000;QD=15.42;ReadPosRankSum=0.190;SOR=1.560	GT:AD:DP:GQ:PL	0/1:13,17:30:99:470,0,322	4	1.26464	1.79158	0.698029	0.62732	0.751224	0.333424
d225006	Ib	Npl4	FBgn0039348	-1	3R:25611368	0.607843	3R	25611368	G	A	CT	FALSE	51	861.6	AC=1;AF=0.500;AN=2;BaseQRankSum=-3.297;DP=51;ExcessHet=3.0103;FS=14.716;MLEAC=1;MLEAF=0.500;MQ=60.00;MQRankSum=0.000;QD=16.89;ReadPosRankSum=-0.639;SOR=0.022	GT:AD:DP:GQ:PL	0/1:20,31:51:99:869,0,588	4	3.48227	4.23072	0.219394	3.06536	2.90157	0.333424
d225006	Ib	Npl4	FBgn0039348	-1	3R:25623086	0.181818	3R	25623086	G	A	CT	FALSE	33	163.6	AC=1;AF=0.500;AN=2;BaseQRankSum=-3.230;DP=33;ExcessHet=3.0103;FS=1.830;MLEAC=1;MLEAF=0.500;MQ=60.00;MQRankSum=0.000;QD=4.96;ReadPosRankSum=1.390;SOR=1.294	GT:AD:DP:GQ:PL	0/1:27,6:33:99:171,0,1109	4	3.48227	4.23072	0.219394	3.06536	2.90157	0.333424
d225006	Ib	Npl4	FBgn0039348	-1	3R:25623089	0.1875	3R	25623089	C	G	GC	FALSE	32	163.6	AC=1;AF=0.500;AN=2;BaseQRankSum=-2.717;DP=32;ExcessHet=3.0103;FS=1.814;MLEAC=1;MLEAF=0.500;MQ=60.00;MQRankSum=0.000;QD=5.11;ReadPosRankSum=1.100;SOR=1.329	GT:AD:DP:GQ:PL	0/1:26,6:32:99:171,0,1109	4	3.48227	4.23072	0.219394	3.06536	2.90157	0.333424
d225006	Ib	CLS	FBgn0039360	-1	3R:25685393	0.440678	3R	25685393	T	A	AT	FALSE	59	630.6	AC=1;AF=0.500;AN=2;BaseQRankSum=-1.593;DP=59;ExcessHet=3.0103;FS=1.441;MLEAC=1;MLEAF=0.500;MQ=60.00;MQRankSum=0.000;QD=10.69;ReadPosRankSum=-1.164;SOR=1.179	GT:AD:DP:GQ:PL	0/1:33,26:59:99:638,0,933	4	2.76752	1.88796	0.563116	2.32657	2.18605	0.333424
d225006	Ib	CLS	FBgn0039360	-1	3R:25686689	0.639344	3R	25686689	T	A	AT	FALSE	62	932.6	AC=1;AF=0.500;AN=2;BaseQRankSum=1.970;DP=62;ExcessHet=3.0103;FS=2.258;MLEAC=1;MLEAF=0.500;MQ=60.00;MQRankSum=0.000;QD=15.29;ReadPosRankSum=-0.543;SOR=1.096	GT:AD:DP:GQ:PL	0/1:22,39:61:99:940,0,455	4	2.76752	1.88796	0.563116	2.32657	2.18605	0.333424
d225006	Ib	Ald1	FBgn0000064	-1	3R:26254088	0.675	3R	26254088	G	C	CG	FALSE	40	1122.6	AC=1;AF=0.500;AN=2;BaseQRankSum=2.370;DP=40;ExcessHet=3.0103;FS=0.000;MLEAC=1;MLEAF=0.500;MQ=60.00;MQRankSum=0.000;QD=28.07;ReadPosRankSum=2.335;SOR=1.609	GT:AD:DP:GQ:PL	0/1:13,27:40:99:1130,0,719	4	11.4026	10.0568	0.0414265	10.8637	11.1339	0.333424
d225006	Ib	Ald1	FBgn0000064	-1	3R:26254107	0.597015	3R	26254107	T	G	AC	FALSE	67	1484.6	AC=1;AF=0.500;AN=2;BaseQRankSum=6.445;DP=67;ExcessHet=3.0103;FS=5.305;MLEAC=1;MLEAF=0.500;MQ=60.00;MQRankSum=0.000;QD=22.16;ReadPosRankSum=2.519;SOR=2.419	GT:AD:DP:GQ:PL	0/1:27,40:67:99:1492,0,1082	4	11.4026	10.0568	0.0414265	10.8637	11.1339	0.333424
d225006	Ib	Ald1	FBgn0000064	-1	3R:26254310	0.487013	3R	26254310	T	A	AT	FALSE	308	4201.6	AC=1;AF=0.500;AN=2;BaseQRankSum=5.120;DP=308;ExcessHet=3.0103;FS=4.554;MLEAC=1;MLEAF=0.500;MQ=60.00;MQRankSum=0.000;QD=13.64;ReadPosRankSum=2.247;SOR=0.454	GT:AD:DP:GQ:PL	0/1:158,150:308:99:4209,0,4453	4	11.4026	10.0568	0.0414265	10.8637	11.1339	0.333424
d225006	Ib	Ald1	FBgn0000064	-1	3R:26254347	0.538462	3R	26254347	G	C	CG	FALSE	273	4709.6	AC=1;AF=0.500;AN=2;BaseQRankSum=-0.644;DP=273;ExcessHet=3.0103;FS=0.924;MLEAC=1;MLEAF=0.500;MQ=60.00;MQRankSum=0.000;QD=17.25;ReadPosRankSum=-2.788;SOR=0.628	GT:AD:DP:GQ:PL	0/1:126,147:273:99:4717,0,3877	4	11.4026	10.0568	0.0414265	10.8637	11.1339	0.333424
d225006	Ib	Ald1	FBgn0000064	-1	3R:26254449	0.428571	3R	26254449	G	T	CA	FALSE	315	3700.6	AC=1;AF=0.500;AN=2;BaseQRankSum=-10.256;DP=315;ExcessHet=3.0103;FS=2.467;MLEAC=1;MLEAF=0.500;MQ=60.00;MQRankSum=0.000;QD=11.75;ReadPosRankSum=-0.318;SOR=0.567	GT:AD:DP:GQ:PL	0/1:180,135:315:99:3708,0,5694	4	11.4026	10.0568	0.0414265	10.8637	11.1339	0.333424
d225006	Ib	Ald1	FBgn0000064	-1	3R:26254539	0.435986	3R	26254539	G	A	CT	FALSE	289	4418.6	AC=1;AF=0.500;AN=2;BaseQRankSum=-4.429;DP=289;ExcessHet=3.0103;FS=3.899;MLEAC=1;MLEAF=0.500;MQ=60.00;MQRankSum=0.000;QD=15.29;ReadPosRankSum=0.391;SOR=0.513	GT:AD:DP:GQ:PL	0/1:163,126:289:99:4426,0,6244	4	11.4026	10.0568	0.0414265	10.8637	11.1339	0.333424
d225006	Ib	Ald1	FBgn0000064	-1	3R:26254561	0.387597	3R	26254561	T	A	AT	FALSE	258	3366.6	AC=1;AF=0.500;AN=2;BaseQRankSum=2.998;DP=258;ExcessHet=3.0103;FS=4.451;MLEAC=1;MLEAF=0.500;MQ=60.00;MQRankSum=0.000;QD=13.05;ReadPosRankSum=2.549;SOR=0.966	GT:AD:DP:GQ:PL	0/1:158,100:258:99:3374,0,5822	4	11.4026	10.0568	0.0414265	10.8637	11.1339	0.333424
d225006	Ib	Ald1	FBgn0000064	-1	3R:26255222	0.479434	3R	26255222	T	A	AT	FALSE	1491	17747.6	AC=1;AF=0.500;AN=2;BaseQRankSum=-12.222;DP=1491;ExcessHet=3.0103;FS=3.181;MLEAC=1;MLEAF=0.500;MQ=60.00;MQRankSum=0.000;QD=11.97;ReadPosRankSum=-2.716;SOR=0.832	GT:AD:DP:GQ:PL	0/1:772,711:1483:99:17755,0,21959	4	11.4026	10.0568	0.0414265	10.8637	11.1339	0.333424
d225006	Ib	Ald1	FBgn0000064	-1	3R:26255318	0.495695	3R	26255318	G	T	CA	FALSE	1629	22329.6	AC=1;AF=0.500;AN=2;BaseQRankSum=-20.950;DP=1629;ExcessHet=3.0103;FS=0.000;MLEAC=1;MLEAF=0.500;MQ=60.00;MQRankSum=0.000;QD=13.73;ReadPosRankSum=2.519;SOR=0.682	GT:AD:DP:GQ:PL	0/1:820,806:1626:99:22337,0,25718	4	11.4026	10.0568	0.0414265	10.8637	11.1339	0.333424
d225006	Ib	Ald1	FBgn0000064	-1	3R:26257733	0.53969	3R	26257733	C	T	GA	FALSE	2132	32607.6	AC=1;AF=0.500;AN=2;BaseQRankSum=-25.616;DP=2132;ExcessHet=3.0103;FS=0.522;MLEAC=1;MLEAF=0.500;MQ=60.00;MQRankSum=0.000;QD=15.32;ReadPosRankSum=1.360;SOR=0.741	GT:AD:DP:GQ:PL	0/1:980,1149:2129:99:32615,0,28996	4	11.4026	10.0568	0.0414265	10.8637	11.1339	0.333424
d225006	Ib	CG5447	FBgn0039427	1	3R:26454421	1	3R	26454421	G	A	GA	FALSE	19	599.03	AC=2;AF=1.00;AN=2;DP=19;ExcessHet=3.0103;FS=0.000;MLEAC=2;MLEAF=1.00;MQ=60.00;QD=31.53;SOR=2.419	GT:AD:DP:GQ:PL	1/1:0,19:19:57:613,57,0	4	2.49219	2.42453	0.817489	1.96622	1.7068	0.333424
d225006	Ib	Yif1	FBgn0288631	1	3R:26719531	1	3R	26719531	C	T	CT	FALSE	32	1090.03	AC=2;AF=1.00;AN=2;DP=32;ExcessHet=3.0103;FS=0.000;MLEAC=2;MLEAF=1.00;MQ=60.00;QD=34.06;SOR=2.448	GT:AD:DP:GQ:PL	1/1:0,32:32:96:1104,96,0	4						0.333424
d225006	Ib	Yif1	FBgn0288631	1	3R:26719582	1	3R	26719582	G	A	GA	FALSE	30	1316.03	AC=2;AF=1.00;AN=2;DP=30;ExcessHet=3.0103;FS=0.000;MLEAC=2;MLEAF=1.00;MQ=60.00;QD=31.40;SOR=1.329	GT:AD:DP:GQ:PL	1/1:0,30:30:90:1330,90,0	4						0.333424
d225006	Ib	Yif1	FBgn0288631	1	3R:26719591	1	3R	26719591	G	A	GA	FALSE	32	1372.03	AC=2;AF=1.00;AN=2;DP=32;ExcessHet=3.0103;FS=0.000;MLEAC=2;MLEAF=1.00;MQ=60.00;QD=26.59;SOR=1.112	GT:AD:DP:GQ:PL	1/1:0,32:32:96:1386,96,0	4						0.333424
d225006	Ib	CG42813	FBgn0261995	-1	3R:27228330	0.673913	3R	27228330	A	C	TG	FALSE	138	2967.6	AC=1;AF=0.500;AN=2;BaseQRankSum=5.807;DP=138;ExcessHet=3.0103;FS=0.792;MLEAC=1;MLEAF=0.500;MQ=60.00;MQRankSum=0.000;QD=21.50;ReadPosRankSum=-1.586;SOR=0.889	GT:AD:DP:GQ:PL	0/1:45,93:138:99:2975,0,1127	4	6.46904	6.38001	0.99582	3.52472	3.93393	0.333424
d225006	Ib	Hmu	FBgn0015737	1	3R:27290032	0.818182	3R	27290032	T	C	TC	FALSE	11	312.6	AC=1;AF=0.500;AN=2;BaseQRankSum=0.349;DP=11;ExcessHet=3.0103;FS=0.000;MLEAC=1;MLEAF=0.500;MQ=60.00;MQRankSum=0.000;QD=28.42;ReadPosRankSum=0.207;SOR=1.179	GT:AD:DP:GQ:PL	0/1:2,9:11:36:320,0,36	4	5.87173	5.77395	0.390105	2.59234	2.73469	0.333424
d225006	Ib	Hmu	FBgn0015737	1	3R:27290212	0.682927	3R	27290212	T	C	TC	FALSE	41	941.6	AC=1;AF=0.500;AN=2;BaseQRankSum=4.608;DP=41;ExcessHet=3.0103;FS=4.921;MLEAC=1;MLEAF=0.500;MQ=60.00;MQRankSum=0.000;QD=22.97;ReadPosRankSum=-2.134;SOR=1.322	GT:AD:DP:GQ:PL	0/1:13,28:41:99:949,0,284	4	5.87173	5.77395	0.390105	2.59234	2.73469	0.333424
d225006	Ib	Hmu	FBgn0015737	1	3R:27290540	0.688525	3R	27290540	G	A	GA	FALSE	61	1263.6	AC=1;AF=0.500;AN=2;BaseQRankSum=-3.133;DP=61;ExcessHet=3.0103;FS=3.814;MLEAC=1;MLEAF=0.500;MQ=60.00;MQRankSum=0.000;QD=20.71;ReadPosRankSum=-0.929;SOR=0.694	GT:AD:DP:GQ:PL	0/1:19,42:61:99:1271,0,525	4	5.87173	5.77395	0.390105	2.59234	2.73469	0.333424
d225006	Ib	Hmu	FBgn0015737	1	3R:27291040	0.945946	3R	27291040	G	T	GT	FALSE	37	1443	AC=2;AF=1.00;AN=2;BaseQRankSum=-2.123;DP=37;ExcessHet=3.0103;FS=6.388;MLEAC=2;MLEAF=1.00;MQ=60.00;MQRankSum=0.000;QD=32.80;ReadPosRankSum=-0.808;SOR=0.402	GT:AD:DP:GQ:PL	1/1:2,35:37:24:1457,24,0	4	5.87173	5.77395	0.390105	2.59234	2.73469	0.333424
d225006	Ib	Hmu	FBgn0015737	1	3R:27291055	0.941176	3R	27291055	T	G	TG	FALSE	34	1287.1	AC=2;AF=1.00;AN=2;BaseQRankSum=2.295;DP=34;ExcessHet=3.0103;FS=3.128;MLEAC=2;MLEAF=1.00;MQ=60.00;MQRankSum=0.000;QD=30.15;ReadPosRankSum=1.360;SOR=0.105	GT:AD:DP:GQ:PL	1/1:2,32:34:12:1301,12,0	4	5.87173	5.77395	0.390105	2.59234	2.73469	0.333424
d225006	Ib	Hmu	FBgn0015737	1	3R:27291295	0.675	3R	27291295	C	A	CA	FALSE	40	746.6	AC=1;AF=0.500;AN=2;BaseQRankSum=0.176;DP=40;ExcessHet=3.0103;FS=0.000;MLEAC=1;MLEAF=0.500;MQ=60.00;MQRankSum=0.000;QD=18.67;ReadPosRankSum=0.507;SOR=0.503	GT:AD:DP:GQ:PL	0/1:13,27:40:99:754,0,282	4	5.87173	5.77395	0.390105	2.59234	2.73469	0.333424
d225006	Ib	Gp93	FBgn0039562	1	3R:27949217	0.422222	3R	27949217	C	T	CT	FALSE	45	465.6	AC=1;AF=0.500;AN=2;BaseQRankSum=-3.567;DP=45;ExcessHet=3.0103;FS=0.000;MLEAC=1;MLEAF=0.500;MQ=60.00;MQRankSum=0.000;QD=10.35;ReadPosRankSum=-1.474;SOR=0.760	GT:AD:DP:GQ:PL	0/1:26,19:45:99:473,0,824	4	5.46458	5.53278	0.962357	2.74479	2.53149	0.333424
d225006	Ib	Gp93	FBgn0039562	1	3R:27949353	0.545455	3R	27949353	T	C	TC	FALSE	22	498.6	AC=1;AF=0.500;AN=2;BaseQRankSum=2.801;DP=22;ExcessHet=3.0103;FS=0.000;MLEAC=1;MLEAF=0.500;MQ=60.00;MQRankSum=0.000;QD=22.66;SOR=0.693	GT:AD:DP:GQ:PL	0/1:10,12:22:99:506,0,381	4	5.46458	5.53278	0.962357	2.74479	2.53149	0.333424
d225006	Ib	Gp93	FBgn0039562	1	3R:27949392	0.5	3R	27949392	T	C	TC	FALSE	14	216.6	AC=1;AF=0.500;AN=2;BaseQRankSum=2.259;DP=14;ExcessHet=3.0103;FS=5.756;MLEAC=1;MLEAF=0.500;MQ=60.00;MQRankSum=0.000;QD=15.47;ReadPosRankSum=-0.952;SOR=2.556	GT:AD:DP:GQ:PL	0/1:7,7:14:99:224,0,207	4	5.46458	5.53278	0.962357	2.74479	2.53149	0.333424
d225006	Ib	Gp93	FBgn0039562	1	3R:27949680	0.73913	3R	27949680	G	A	GA	FALSE	23	497.6	AC=1;AF=0.500;AN=2;BaseQRankSum=-0.693;DP=23;ExcessHet=3.0103;FS=0.000;MLEAC=1;MLEAF=0.500;MQ=60.00;MQRankSum=0.000;QD=21.63;ReadPosRankSum=1.798;SOR=0.722	GT:AD:DP:GQ:PL	0/1:6,17:23:99:505,0,127	4	5.46458	5.53278	0.962357	2.74479	2.53149	0.333424
d225006	Ib	Gp93	FBgn0039562	1	3R:27951702	0.106383	3R	27951702	C	T	CT	FALSE	47	67.6	AC=1;AF=0.500;AN=2;BaseQRankSum=-0.691;DP=47;ExcessHet=3.0103;FS=1.882;MLEAC=1;MLEAF=0.500;MQ=60.00;MQRankSum=0.000;QD=1.44;ReadPosRankSum=-0.173;SOR=1.112	GT:AD:DP:GQ:PL	0/1:42,5:47:75:75,0,2582	4	5.46458	5.53278	0.962357	2.74479	2.53149	0.333424
d225006	Ib	trv	FBgn0085391	1	3R:28088444	0.722222	3R	28088444	G	C	GC	FALSE	18	439.6	AC=1;AF=0.500;AN=2;BaseQRankSum=3.430;DP=18;ExcessHet=3.0103;FS=6.039;MLEAC=1;MLEAF=0.500;MQ=60.00;MQRankSum=0.000;QD=24.42;ReadPosRankSum=0.899;SOR=0.061	GT:AD:DP:GQ:PL	0/1:5,13:18:99:447,0,132	4	5.56168	6.7849	9.72718e-07	0.167526	0.124862	0.333424
d225006	Ib	Pkc98E	FBgn0003093	1	3R:29046104	0.731707	3R	29046104	C	G	CG	FALSE	41	923.6	AC=1;AF=0.500;AN=2;BaseQRankSum=1.980;DP=41;ExcessHet=3.0103;FS=3.461;MLEAC=1;MLEAF=0.500;MQ=60.00;MQRankSum=0.000;QD=22.53;ReadPosRankSum=0.050;SOR=0.223	GT:AD:DP:GQ:PL	0/1:11,30:41:99:931,0,257	4	4.42269	4.69937	0.833844	1.73884	1.5978	0.333424
d225006	Ib	Pkc98E	FBgn0003093	1	3R:29046301	0.921053	3R	29046301	T	C	TC	FALSE	38	1508.6	AC=1;AF=0.500;AN=2;BaseQRankSum=2.599;DP=38;ExcessHet=3.0103;FS=2.258;MLEAC=1;MLEAF=0.500;MQ=60.00;MQRankSum=0.000;QD=26.30;ReadPosRankSum=0.897;SOR=0.604	GT:AD:DP:GQ:PL	0/1:3,35:38:65:1516,0,65	4	4.42269	4.69937	0.833844	1.73884	1.5978	0.333424
d225006	Ib	Pkc98E	FBgn0003093	1	3R:29046438	0.875	3R	29046438	A	C	AC	FALSE	48	1296.61	AC=1;AF=0.500;AN=2;BaseQRankSum=2.794;DP=48;ExcessHet=3.0103;FS=11.514;MLEAC=1;MLEAF=0.500;MQ=60.00;MQRankSum=0.000;QD=27.01;ReadPosRankSum=0.750;SOR=3.365	GT:AD:DP:GQ:PL	0/1:6,42:48:15:1304,0,15	4	4.42269	4.69937	0.833844	1.73884	1.5978	0.333424
d225006	Ib	Pkc98E	FBgn0003093	1	3R:29046521	0.65	3R	29046521	G	A	GA	FALSE	20	385.6	AC=1;AF=0.500;AN=2;BaseQRankSum=0.087;DP=20;ExcessHet=3.0103;FS=1.862;MLEAC=1;MLEAF=0.500;MQ=60.00;MQRankSum=0.000;QD=19.28;ReadPosRankSum=-0.241;SOR=1.270	GT:AD:DP:GQ:PL	0/1:7,13:20:99:393,0,166	4	4.42269	4.69937	0.833844	1.73884	1.5978	0.333424
d225006	Ib	Vha100-1	FBgn0028671	1	3R:29136568	0.631579	3R	29136568	A	T	AT	FALSE	38	649.6	AC=1;AF=0.500;AN=2;BaseQRankSum=-1.451;DP=38;ExcessHet=3.0103;FS=0.000;MLEAC=1;MLEAF=0.500;MQ=60.00;MQRankSum=0.000;QD=17.09;ReadPosRankSum=0.212;SOR=0.693	GT:AD:DP:GQ:PL	0/1:14,24:38:99:657,0,361	4	5.18346	5.07595	0.904536	2.65104	2.40442	0.333424
d225006	Ib	Vha100-1	FBgn0028671	1	3R:29136580	0.625	3R	29136580	T	C	TC	FALSE	40	764.6	AC=1;AF=0.500;AN=2;BaseQRankSum=2.602;DP=40;ExcessHet=3.0103;FS=0.000;MLEAC=1;MLEAF=0.500;MQ=60.00;MQRankSum=0.000;QD=19.12;ReadPosRankSum=0.070;SOR=0.668	GT:AD:DP:GQ:PL	0/1:15,25:40:99:772,0,388	4	5.18346	5.07595	0.904536	2.65104	2.40442	0.333424
d225006	Ib	Pglym78	FBgn0014869	1	3R:29148367	0.515625	3R	29148367	A	T	AT	FALSE	128	1710.6	AC=1;AF=0.500;AN=2;BaseQRankSum=-2.006;DP=128;ExcessHet=3.0103;FS=17.450;MLEAC=1;MLEAF=0.500;MQ=60.00;MQRankSum=0.000;QD=13.36;ReadPosRankSum=-0.442;SOR=2.392	GT:AD:DP:GQ:PL	0/1:62,66:128:99:1718,0,1567	4	10.0726	8.55606	0.377268	9.34799	10.0215	0.333424
d225006	Ib	Pglym78	FBgn0014869	1	3R:29149049	0.51168	3R	29149049	T	G	TG	FALSE	901	14253.6	AC=1;AF=0.500;AN=2;BaseQRankSum=19.955;DP=901;ExcessHet=3.0103;FS=5.861;MLEAC=1;MLEAF=0.500;MQ=60.00;MQRankSum=0.000;QD=15.85;ReadPosRankSum=-0.703;SOR=0.651	GT:AD:DP:GQ:PL	0/1:439,460:899:99:14261,0,12156	4	10.0726	8.55606	0.377268	9.34799	10.0215	0.333424
d225006	Ib	Pglym78	FBgn0014869	1	3R:29149130	0.445126	3R	29149130	T	C	TC	FALSE	1671	21936.6	AC=1;AF=0.500;AN=2;BaseQRankSum=27.818;DP=1671;ExcessHet=3.0103;FS=1.114;MLEAC=1;MLEAF=0.500;MQ=60.00;MQRankSum=0.000;QD=13.45;ReadPosRankSum=3.422;SOR=0.781	GT:AD:DP:GQ:PL	0/1:905,726:1631:99:21944,0,23170	4	10.0726	8.55606	0.377268	9.34799	10.0215	0.333424
d225006	Ib	Pglym78	FBgn0014869	1	3R:29149232	0.505896	3R	29149232	C	G	CG	FALSE	1698	24913.6	AC=1;AF=0.500;AN=2;BaseQRankSum=-26.080;DP=1698;ExcessHet=3.0103;FS=1.090;MLEAC=1;MLEAF=0.500;MQ=60.00;MQRankSum=0.000;QD=14.69;ReadPosRankSum=-0.714;SOR=0.759	GT:AD:DP:GQ:PL	0/1:838,858:1696:99:24921,0,26449	4	10.0726	8.55606	0.377268	9.34799	10.0215	0.333424
d225006	Ib	jus	FBgn0039647	-1	3R:29173141	0.333333	3R	29173141	A	T	TA	FALSE	21	224.6	AC=1;AF=0.500;AN=2;BaseQRankSum=-1.962;DP=21;ExcessHet=3.0103;FS=0.000;MLEAC=1;MLEAF=0.500;MQ=60.00;MQRankSum=0.000;QD=10.70;ReadPosRankSum=0.712;SOR=0.941	GT:AD:DP:GQ:PL	0/1:14,7:21:99:232,0,554	4	5.26612	7.39983	8.31329e-16	0.167237	0.158941	0.333424
d225006	Ib	jus	FBgn0039647	-1	3R:29173166	0.28	3R	29173166	A	G	TC	FALSE	25	225.6	AC=1;AF=0.500;AN=2;BaseQRankSum=3.470;DP=25;ExcessHet=3.0103;FS=1.828;MLEAC=1;MLEAF=0.500;MQ=60.00;MQRankSum=0.000;QD=9.02;ReadPosRankSum=0.426;SOR=0.697	GT:AD:DP:GQ:PL	0/1:18,7:25:99:233,0,648	4	5.26612	7.39983	8.31329e-16	0.167237	0.158941	0.333424
d225006	Ib	eEF1gamma	FBgn0029176	1	3R:29221960	0.485714	3R	29221960	C	T	CT	FALSE	490	6461.6	AC=1;AF=0.500;AN=2;BaseQRankSum=-10.555;DP=490;ExcessHet=3.0103;FS=1.212;MLEAC=1;MLEAF=0.500;MQ=60.00;MQRankSum=0.000;QD=13.19;ReadPosRankSum=1.435;SOR=0.793	GT:AD:DP:GQ:PL	0/1:252,238:490:99:6469,0,7666	4	9.3769	9.22772	0.857501	8.24884	8.24024	0.333424
d225006	Ib	Cisd2	FBgn0062442	-1	3R:29222758	0.590909	3R	29222758	A	G	TC	FALSE	44	792.6	AC=1;AF=0.500;AN=2;BaseQRankSum=4.475;DP=44;ExcessHet=3.0103;FS=4.461;MLEAC=1;MLEAF=0.500;MQ=60.00;MQRankSum=0.000;QD=18.01;ReadPosRankSum=1.005;SOR=0.799	GT:AD:DP:GQ:PL	0/1:18,26:44:99:800,0,336	4	6.57453	6.88852	0.938692	5.87993	5.77744	0.333424
d225006	Ib	Cnx99A	FBgn0015622	-1	3R:29315733	0.833333	3R	29315733	G	A	CT	FALSE	24	480.6	AC=1;AF=0.500;AN=2;BaseQRankSum=-2.043;DP=24;ExcessHet=3.0103;FS=0.000;MLEAC=1;MLEAF=0.500;MQ=60.00;MQRankSum=0.000;QD=20.03;ReadPosRankSum=0.661;SOR=0.892	GT:AD:DP:GQ:PL	0/1:4,20:24:80:488,0,80	4	5.37514	5.28525	0.729489	2.58793	2.27049	0.333424
d225006	Ib	Ptp99A	FBgn0004369	1	3R:29483336	0.666667	3R	29483336	C	T	CT	FALSE	12	222.6	AC=1;AF=0.500;AN=2;BaseQRankSum=-3.087;DP=12;ExcessHet=3.0103;FS=0.000;MLEAC=1;MLEAF=0.500;MQ=60.00;MQRankSum=0.000;QD=18.55;ReadPosRankSum=-0.670;SOR=0.859	GT:AD:DP:GQ:PL	0/1:4,8:12:99:230,0,122	4	4.34922	4.16541	0.576197	1.29803	1.03192	0.333424
d225006	Ib	CG1907	FBgn0039674	1	3R:29619730	0.337838	3R	29619730	C	T	CT	FALSE	74	625.6	AC=1;AF=0.500;AN=2;BaseQRankSum=-3.065;DP=74;ExcessHet=3.0103;FS=8.436;MLEAC=1;MLEAF=0.500;MQ=60.00;MQRankSum=0.000;QD=8.45;ReadPosRankSum=0.090;SOR=1.594	GT:AD:DP:GQ:PL	0/1:49,25:74:99:633,0,1549	4	2.96927	1.9565	0.114002	3.63121	3.23907	0.333424
d225006	Ib	CG1907	FBgn0039674	1	3R:29619778	0.375	3R	29619778	C	T	CT	FALSE	40	370.6	AC=1;AF=0.500;AN=2;BaseQRankSum=-2.711;DP=40;ExcessHet=3.0103;FS=0.000;MLEAC=1;MLEAF=0.500;MQ=60.00;MQRankSum=0.000;QD=9.27;ReadPosRankSum=0.352;SOR=0.755	GT:AD:DP:GQ:PL	0/1:25,15:40:99:378,0,784	4	2.96927	1.9565	0.114002	3.63121	3.23907	0.333424
d225006	Ib	CG1907	FBgn0039674	1	3R:29620300	0.204819	3R	29620300	C	T	CT	FALSE	84	322.6	AC=1;AF=0.500;AN=2;BaseQRankSum=-4.107;DP=84;ExcessHet=3.0103;FS=0.000;MLEAC=1;MLEAF=0.500;MQ=60.00;MQRankSum=0.000;QD=3.89;ReadPosRankSum=0.475;SOR=0.599	GT:AD:DP:GQ:PL	0/1:66,17:83:99:330,0,2149	4	2.96927	1.9565	0.114002	3.63121	3.23907	0.333424
d225006	Ib	CG1907	FBgn0039674	1	3R:29620486	0.336538	3R	29620486	T	C	TC	FALSE	104	915.6	AC=1;AF=0.500;AN=2;BaseQRankSum=4.088;DP=104;ExcessHet=3.0103;FS=6.735;MLEAC=1;MLEAF=0.500;MQ=60.00;MQRankSum=0.000;QD=8.80;ReadPosRankSum=0.314;SOR=1.265	GT:AD:DP:GQ:PL	0/1:69,35:104:99:923,0,1977	4	2.96927	1.9565	0.114002	3.63121	3.23907	0.333424
d225006	Ib	CG1907	FBgn0039674	1	3R:29620589	0.460317	3R	29620589	G	C	GC	FALSE	63	1072.6	AC=1;AF=0.500;AN=2;BaseQRankSum=-0.893;DP=63;ExcessHet=3.0103;FS=3.784;MLEAC=1;MLEAF=0.500;MQ=60.00;MQRankSum=0.000;QD=17.03;ReadPosRankSum=-0.352;SOR=0.315	GT:AD:DP:GQ:PL	0/1:34,29:63:99:1080,0,1338	4	2.96927	1.9565	0.114002	3.63121	3.23907	0.333424
d225006	Ib	CG18731	FBgn0042213	1	3R:29725253	1	3R	29725253	C	G	CG	FALSE	72	3198.03	AC=2;AF=1.00;AN=2;DP=72;ExcessHet=3.0103;FS=0.000;MLEAC=2;MLEAF=1.00;MQ=60.00;QD=30.03;SOR=1.885	GT:AD:DP:GQ:PL	1/1:0,72:72:99:3212,225,0	4	2.10343	1.68728	0.940366	1.91536	1.85703	0.333424
d225006	Ib	CG7601	FBgn0027583	-1	3R:29735639	1	3R	29735639	C	T	GA	FALSE	21	614.03	AC=2;AF=1.00;AN=2;DP=21;ExcessHet=3.0103;FS=0.000;MLEAC=2;MLEAF=1.00;MQ=60.00;QD=29.24;SOR=0.784	GT:AD:DP:GQ:PL	1/1:0,21:21:62:628,62,0	4	1.92099	1.10718	0.137517	0.820758	1.07005	0.333424
d225006	Ib	kay	FBgn0001297	1	3R:29782674	1	3R	29782674	T	G	TG	FALSE	12	501.02	AC=2;AF=1.00;AN=2;DP=12;ExcessHet=3.0103;FS=0.000;MLEAC=2;MLEAF=1.00;MQ=60.00;QD=25.32;SOR=1.022	GT:AD:DP:GQ:PL	1/1:0,12:12:39:515,39,0	4	5.08707	5.90756	0.125239	4.66592	4.33526	0.333424
d225006	Ib	kay	FBgn0001297	1	3R:29792061	0.9	3R	29792061	C	T	CT	FALSE	20	460.61	AC=1;AF=0.500;AN=2;BaseQRankSum=-1.679;DP=20;ExcessHet=3.0103;FS=0.000;MLEAC=1;MLEAF=0.500;MQ=60.00;MQRankSum=0.000;QD=23.03;ReadPosRankSum=1.204;SOR=0.914	GT:AD:DP:GQ:PL	0/1:2,18:20:15:468,0,15	4	5.08707	5.90756	0.125239	4.66592	4.33526	0.333424
d225006	Ib	kay	FBgn0001297	1	3R:29792130	0.866667	3R	29792130	G	C	GC	FALSE	15	423.6	AC=1;AF=0.500;AN=2;BaseQRankSum=-2.014;DP=15;ExcessHet=3.0103;FS=8.451;MLEAC=1;MLEAF=0.500;MQ=60.00;MQRankSum=0.000;QD=28.24;ReadPosRankSum=1.275;SOR=1.414	GT:AD:DP:GQ:PL	0/1:2,13:15:35:431,0,35	4	5.08707	5.90756	0.125239	4.66592	4.33526	0.333424
d225006	Ib	Etfb	FBgn0039697	-1	3R:29801813	0.473214	3R	29801813	G	A	CT	FALSE	112	1461.6	AC=1;AF=0.500;AN=2;BaseQRankSum=-2.039;DP=112;ExcessHet=3.0103;FS=2.203;MLEAC=1;MLEAF=0.500;MQ=60.00;MQRankSum=0.000;QD=13.05;ReadPosRankSum=1.270;SOR=0.297	GT:AD:DP:GQ:PL	0/1:59,53:112:99:1469,0,1760	4	3.23977	2.84256	0.833576	4.60934	4.72143	0.333424
d225006	Ib	Etfb	FBgn0039697	-1	3R:29801841	0.398058	3R	29801841	G	A	CT	FALSE	103	865.6	AC=1;AF=0.500;AN=2;BaseQRankSum=-6.623;DP=103;ExcessHet=3.0103;FS=7.491;MLEAC=1;MLEAF=0.500;MQ=60.00;MQRankSum=0.000;QD=8.40;ReadPosRankSum=0.337;SOR=1.710	GT:AD:DP:GQ:PL	0/1:62,41:103:99:873,0,1898	4	3.23977	2.84256	0.833576	4.60934	4.72143	0.333424
d225006	Ib	Etfb	FBgn0039697	-1	3R:29802009	0.489583	3R	29802009	G	T	CA	FALSE	96	1325.6	AC=1;AF=0.500;AN=2;BaseQRankSum=-5.521;DP=96;ExcessHet=3.0103;FS=3.845;MLEAC=1;MLEAF=0.500;MQ=60.00;MQRankSum=0.000;QD=13.81;ReadPosRankSum=-2.168;SOR=1.099	GT:AD:DP:GQ:PL	0/1:49,47:96:99:1333,0,1582	4	3.23977	2.84256	0.833576	4.60934	4.72143	0.333424
d225006	Ib	Etfb	FBgn0039697	-1	3R:29802024	0.463158	3R	29802024	A	T	TA	FALSE	95	1267.6	AC=1;AF=0.500;AN=2;BaseQRankSum=1.236;DP=95;ExcessHet=3.0103;FS=2.710;MLEAC=1;MLEAF=0.500;MQ=60.00;MQRankSum=0.000;QD=13.34;ReadPosRankSum=-1.078;SOR=1.055	GT:AD:DP:GQ:PL	0/1:51,44:95:99:1275,0,1365	4	3.23977	2.84256	0.833576	4.60934	4.72143	0.333424
d225006	Ib	Etfb	FBgn0039697	-1	3R:29802282	0.583333	3R	29802282	C	T	GA	FALSE	96	1469.6	AC=1;AF=0.500;AN=2;BaseQRankSum=-4.353;DP=96;ExcessHet=3.0103;FS=1.732;MLEAC=1;MLEAF=0.500;MQ=60.00;MQRankSum=0.000;QD=15.31;ReadPosRankSum=0.037;SOR=0.482	GT:AD:DP:GQ:PL	0/1:40,56:96:99:1477,0,1225	4	3.23977	2.84256	0.833576	4.60934	4.72143	0.333424
d225006	Ib	Etfb	FBgn0039697	-1	3R:29802367	0.513514	3R	29802367	G	A	CT	FALSE	111	1257.6	AC=1;AF=0.500;AN=2;BaseQRankSum=-4.934;DP=111;ExcessHet=3.0103;FS=2.450;MLEAC=1;MLEAF=0.500;MQ=60.00;MQRankSum=0.000;QD=11.33;ReadPosRankSum=-0.578;SOR=0.471	GT:AD:DP:GQ:PL	0/1:54,57:111:99:1265,0,1488	4	3.23977	2.84256	0.833576	4.60934	4.72143	0.333424
d225006	Ib	RpS8	FBgn0039713	1	3R:29862959	0.458564	3R	29862959	T	C	TC	FALSE	2176	28924.6	AC=1;AF=0.500;AN=2;BaseQRankSum=20.713;DP=2176;ExcessHet=3.0103;FS=1.756;MLEAC=1;MLEAF=0.500;MQ=60.00;MQRankSum=0.000;QD=13.32;ReadPosRankSum=-0.135;SOR=0.845	GT:AD:DP:GQ:PL	0/1:1176,996:2172:99:28932,0,34074	4	12.4079	12.3182	0.473228	11.7965	11.7074	0.333424
d225006	Ib	RpS8	FBgn0039713	1	3R:29863737	0.423077	3R	29863737	G	A	GA	FALSE	26	282.6	AC=1;AF=0.500;AN=2;BaseQRankSum=-2.736;DP=26;ExcessHet=3.0103;FS=9.631;MLEAC=1;MLEAF=0.500;MQ=60.00;MQRankSum=0.000;QD=10.87;ReadPosRankSum=0.599;SOR=1.006	GT:AD:DP:GQ:PL	0/1:15,11:26:99:290,0,479	4	12.4079	12.3182	0.473228	11.7965	11.7074	0.333424
d225006	Ib	CG42557	FBgn0260759	1	3R:29933689	0.272727	3R	29933689	A	T	AT	FALSE	55	270.6	AC=1;AF=0.500;AN=2;BaseQRankSum=-2.302;DP=55;ExcessHet=3.0103;FS=0.000;MLEAC=1;MLEAF=0.500;MQ=60.00;MQRankSum=0.000;QD=4.92;ReadPosRankSum=-0.381;SOR=0.623	GT:AD:DP:GQ:PL	0/1:40,15:55:99:278,0,1139	4	2.79499	2.86296	0.838214	1.60231	1.78326	0.333424
d225006	Ib	Nlp	FBgn0016685	1	3R:30005004	0.452381	3R	30005004	G	C	GC	FALSE	42	498.6	AC=1;AF=0.500;AN=2;BaseQRankSum=1.790;DP=42;ExcessHet=3.0103;FS=9.674;MLEAC=1;MLEAF=0.500;MQ=60.00;MQRankSum=0.000;QD=11.87;ReadPosRankSum=0.967;SOR=2.275	GT:AD:DP:GQ:PL	0/1:23,19:42:99:506,0,621	4	8.16761	8.89378	0.1925	4.62499	5.00213	0.333424
d225006	Ib	CG7920	FBgn0039737	-1	3R:30012000	0.506944	3R	30012000	G	C	CG	FALSE	145	2283.6	AC=1;AF=0.500;AN=2;BaseQRankSum=5.187;DP=145;ExcessHet=3.0103;FS=0.000;MLEAC=1;MLEAF=0.500;MQ=60.00;MQRankSum=0.000;QD=15.86;ReadPosRankSum=0.974;SOR=0.658	GT:AD:DP:GQ:PL	0/1:71,73:144:99:2291,0,2105	4	3.89755	2.69069	0.0685211	3.59216	3.86313	0.333424
d225006	Ib	CG7920	FBgn0039737	-1	3R:30015121	0.404762	3R	30015121	A	G	TC	FALSE	42	501.6	AC=1;AF=0.500;AN=2;BaseQRankSum=3.655;DP=42;ExcessHet=3.0103;FS=0.000;MLEAC=1;MLEAF=0.500;MQ=60.00;MQRankSum=0.000;QD=11.94;ReadPosRankSum=-1.145;SOR=0.368	GT:AD:DP:GQ:PL	0/1:25,17:42:99:509,0,661	4	3.89755	2.69069	0.0685211	3.59216	3.86313	0.333424
d225006	Ib	janA	FBgn0001280	-1	3R:30038750	0.457143	3R	30038750	C	T	GA	FALSE	175	1874.6	AC=1;AF=0.500;AN=2;BaseQRankSum=-8.093;DP=175;ExcessHet=3.0103;FS=4.121;MLEAC=1;MLEAF=0.500;MQ=60.00;MQRankSum=0.000;QD=10.71;ReadPosRankSum=-0.576;SOR=0.385	GT:AD:DP:GQ:PL	0/1:95,80:175:99:1882,0,2947	4	4.74124	4.2695	0.873393	4.44041	4.42055	0.333424
d225006	Ib	janA	FBgn0001280	-1	3R:30038801	0.510791	3R	30038801	A	G	TC	FALSE	139	2091.6	AC=1;AF=0.500;AN=2;BaseQRankSum=6.690;DP=139;ExcessHet=3.0103;FS=3.128;MLEAC=1;MLEAF=0.500;MQ=60.00;MQRankSum=0.000;QD=15.05;ReadPosRankSum=0.544;SOR=0.449	GT:AD:DP:GQ:PL	0/1:68,71:139:99:2099,0,1784	4	4.74124	4.2695	0.873393	4.44041	4.42055	0.333424
d225006	Ib	janA	FBgn0001280	-1	3R:30039095	0.456221	3R	30039095	C	G	GC	FALSE	217	3016.6	AC=1;AF=0.500;AN=2;BaseQRankSum=-4.591;DP=217;ExcessHet=3.0103;FS=1.116;MLEAC=1;MLEAF=0.500;MQ=60.00;MQRankSum=0.000;QD=13.90;ReadPosRankSum=0.063;SOR=0.601	GT:AD:DP:GQ:PL	0/1:118,99:217:99:3024,0,4004	4	4.74124	4.2695	0.873393	4.44041	4.42055	0.333424
d225006	Ib	janA	FBgn0001280	-1	3R:30039263	0.51073	3R	30039263	C	T	GA	FALSE	233	2922.6	AC=1;AF=0.500;AN=2;BaseQRankSum=-8.731;DP=233;ExcessHet=3.0103;FS=0.493;MLEAC=1;MLEAF=0.500;MQ=60.00;MQRankSum=0.000;QD=12.54;ReadPosRankSum=-0.335;SOR=0.745	GT:AD:DP:GQ:PL	0/1:114,119:233:99:2930,0,3365	4	4.74124	4.2695	0.873393	4.44041	4.42055	0.333424
d225006	Ib	janA	FBgn0001280	-1	3R:30039305	0.479495	3R	30039305	A	T	TA	FALSE	317	4091.6	AC=1;AF=0.500;AN=2;BaseQRankSum=-4.912;DP=317;ExcessHet=3.0103;FS=3.928;MLEAC=1;MLEAF=0.500;MQ=60.00;MQRankSum=0.000;QD=12.91;ReadPosRankSum=-0.525;SOR=0.508	GT:AD:DP:GQ:PL	0/1:165,152:317:99:4099,0,4505	4	4.74124	4.2695	0.873393	4.44041	4.42055	0.333424
d225006	Ib	Jasper	FBgn0039743	1	3R:30054251	0.28	3R	30054251	T	C	TC	FALSE	25	189.6	AC=1;AF=0.500;AN=2;BaseQRankSum=3.142;DP=25;ExcessHet=3.0103;FS=1.721;MLEAC=1;MLEAF=0.500;MQ=60.00;MQRankSum=0.000;QD=7.58;ReadPosRankSum=-0.273;SOR=0.374	GT:AD:DP:GQ:PL	0/1:18,7:25:99:197,0,553	4	1.41161	1.99815	0.60518	0.80405	0.89116	0.333424
d225006	Ib	Tpi	FBgn0086355	-1	3R:30133353	0.502657	3R	30133353	C	T	GA	FALSE	1883	25366.6	AC=1;AF=0.500;AN=2;BaseQRankSum=-30.037;DP=1883;ExcessHet=3.0103;FS=0.000;MLEAC=1;MLEAF=0.500;MQ=60.00;MQRankSum=0.000;QD=13.48;ReadPosRankSum=1.954;SOR=0.646	GT:AD:DP:GQ:PL	0/1:936,946:1882:99:25374,0,29827	4	9.70628	7.95355	0.0376291	9.03923	9.78331	0.333424
d225006	Ib	Tpi	FBgn0086355	-1	3R:30133374	0.501292	3R	30133374	G	T	CA	FALSE	1936	37451.6	AC=1;AF=0.500;AN=2;BaseQRankSum=-28.978;DP=1936;ExcessHet=3.0103;FS=0.000;MLEAC=1;MLEAF=0.500;MQ=60.00;MQRankSum=0.000;QD=19.35;ReadPosRankSum=2.044;SOR=0.724	GT:AD:DP:GQ:PL	0/1:965,970:1935:99:37459,0,34257	4	9.70628	7.95355	0.0376291	9.03923	9.78331	0.333424
d225006	Ib	Tpi	FBgn0086355	-1	3R:30133383	0.510204	3R	30133383	G	A	CT	FALSE	1961	28099.6	AC=1;AF=0.500;AN=2;BaseQRankSum=-26.364;DP=1961;ExcessHet=3.0103;FS=0.521;MLEAC=1;MLEAF=0.500;MQ=60.00;MQRankSum=0.000;QD=14.34;ReadPosRankSum=-0.665;SOR=0.787	GT:AD:DP:GQ:PL	0/1:960,1000:1960:99:28107,0,36812	4	9.70628	7.95355	0.0376291	9.03923	9.78331	0.333424
d225006	Ib	Tpi	FBgn0086355	-1	3R:30133813	0.531603	3R	30133813	G	C	CG	FALSE	1777	29341.6	AC=1;AF=0.500;AN=2;BaseQRankSum=20.851;DP=1777;ExcessHet=3.0103;FS=0.519;MLEAC=1;MLEAF=0.500;MQ=60.00;MQRankSum=0.000;QD=16.56;ReadPosRankSum=3.574;SOR=0.649	GT:AD:DP:GQ:PL	0/1:830,942:1772:99:29349,0,23766	4	9.70628	7.95355	0.0376291	9.03923	9.78331	0.333424
d225006	Ib	VhaAC45RP	FBgn0051030	-1	3R:30165771	0.919355	3R	30165771	A	G	TC	FALSE	62	2022.02	AC=2;AF=1.00;AN=2;BaseQRankSum=2.880;DP=62;ExcessHet=3.0103;FS=0.000;MLEAC=2;MLEAF=1.00;MQ=60.00;MQRankSum=0.000;QD=32.61;ReadPosRankSum=-0.155;SOR=0.787	GT:AD:DP:GQ:PL	1/1:5,57:62:35:2036,35,0	4	6.3392	6.42463	0.721484	0.410326	0.49666	0.333424
d225006	Ib	VhaAC45RP	FBgn0051030	-1	3R:30165819	0.95082	3R	30165819	C	G	GC	FALSE	61	2086.03	AC=2;AF=1.00;AN=2;BaseQRankSum=0.223;DP=61;ExcessHet=3.0103;FS=0.000;MLEAC=2;MLEAF=1.00;MQ=60.00;MQRankSum=0.000;QD=34.20;ReadPosRankSum=0.101;SOR=0.411	GT:AD:DP:GQ:PL	1/1:3,58:61:77:2100,77,0	4	6.3392	6.42463	0.721484	0.410326	0.49666	0.333424
d225006	Ib	VhaAC45RP	FBgn0051030	-1	3R:30165876	0.940299	3R	30165876	G	A	CT	FALSE	67	1965.03	AC=2;AF=1.00;AN=2;BaseQRankSum=-1.099;DP=67;ExcessHet=3.0103;FS=4.663;MLEAC=2;MLEAF=1.00;MQ=60.00;MQRankSum=0.000;QD=29.33;ReadPosRankSum=0.093;SOR=0.477	GT:AD:DP:GQ:PL	1/1:4,63:67:77:1979,77,0	4	6.3392	6.42463	0.721484	0.410326	0.49666	0.333424
d225006	Ib	VhaAC45RP	FBgn0051030	-1	3R:30166113	0.918367	3R	30166113	G	A	CT	FALSE	49	1407.66	AC=1;AF=0.500;AN=2;BaseQRankSum=-3.156;DP=49;ExcessHet=3.0103;FS=4.576;MLEAC=1;MLEAF=0.500;MQ=60.00;MQRankSum=0.000;QD=28.73;ReadPosRankSum=-0.696;SOR=0.433	GT:AD:DP:GQ:PL	0/1:4,45:49:9:1415,0,9	4	6.3392	6.42463	0.721484	0.410326	0.49666	0.333424
d225006	Ib	VhaAC45RP	FBgn0051030	-1	3R:30166242	0.88	3R	30166242	G	C	CG	FALSE	75	2196.6	AC=1;AF=0.500;AN=2;BaseQRankSum=-0.241;DP=75;ExcessHet=3.0103;FS=1.525;MLEAC=1;MLEAF=0.500;MQ=60.00;MQRankSum=0.000;QD=29.29;ReadPosRankSum=1.718;SOR=1.154	GT:AD:DP:GQ:PL	0/1:9,66:75:99:2204,0,99	4	6.3392	6.42463	0.721484	0.410326	0.49666	0.333424
d225006	Ib	Mlc2	FBgn0002773	-1	3R:30173047	0.490327	3R	30173047	G	A	CT	FALSE	3003	39435.6	AC=1;AF=0.500;AN=2;BaseQRankSum=-36.741;DP=3003;ExcessHet=3.0103;FS=0.541;MLEAC=1;MLEAF=0.500;MQ=60.00;MQRankSum=0.000;QD=13.15;ReadPosRankSum=-1.925;SOR=0.632	GT:AD:DP:GQ:PL	0/1:1528,1470:2998:99:39443,0,47205	4	8.19253	7.69483	0.920489	11.9513	12.5757	0.333424
d225006	Ib	CG1983	FBgn0039751	-1	3R:30176503	0.325581	3R	30176503	C	T	GA	FALSE	43	398.6	AC=1;AF=0.500;AN=2;BaseQRankSum=-3.684;DP=43;ExcessHet=3.0103;FS=7.294;MLEAC=1;MLEAF=0.500;MQ=60.00;MQRankSum=0.000;QD=9.27;ReadPosRankSum=-0.533;SOR=1.961	GT:AD:DP:GQ:PL	0/1:29,14:43:99:406,0,1117	4	2.38572	2.69018	0.980606	1.77594	1.87856	0.333424
d225006	Ib	CG1983	FBgn0039751	-1	3R:30176521	0.384615	3R	30176521	A	G	TC	FALSE	39	547.6	AC=1;AF=0.500;AN=2;BaseQRankSum=4.840;DP=39;ExcessHet=3.0103;FS=5.808;MLEAC=1;MLEAF=0.500;MQ=60.00;MQRankSum=0.000;QD=14.04;ReadPosRankSum=-1.638;SOR=1.961	GT:AD:DP:GQ:PL	0/1:24,15:39:99:555,0,1005	4	2.38572	2.69018	0.980606	1.77594	1.87856	0.333424
d225006	Ib	CG1983	FBgn0039751	-1	3R:30177261	0.461538	3R	30177261	C	T	GA	FALSE	26	349.6	AC=1;AF=0.500;AN=2;BaseQRankSum=-1.245;DP=26;ExcessHet=3.0103;FS=1.657;MLEAC=1;MLEAF=0.500;MQ=60.00;MQRankSum=0.000;QD=13.45;ReadPosRankSum=0.259;SOR=1.179	GT:AD:DP:GQ:PL	0/1:14,12:26:99:357,0,378	4	2.38572	2.69018	0.980606	1.77594	1.87856	0.333424
d225006	Ib	CG1983	FBgn0039751	-1	3R:30177369	0.470588	3R	30177369	C	A	GT	FALSE	34	427.6	AC=1;AF=0.500;AN=2;BaseQRankSum=-3.932;DP=34;ExcessHet=3.0103;FS=14.575;MLEAC=1;MLEAF=0.500;MQ=60.00;MQRankSum=0.000;QD=12.58;ReadPosRankSum=0.711;SOR=0.948	GT:AD:DP:GQ:PL	0/1:18,16:34:99:435,0,542	4	2.38572	2.69018	0.980606	1.77594	1.87856	0.333424
d225006	Ib	CG1983	FBgn0039751	-1	3R:30177528	0.642857	3R	30177528	C	A	GT	FALSE	28	492.6	AC=1;AF=0.500;AN=2;BaseQRankSum=-2.918;DP=28;ExcessHet=3.0103;FS=12.085;MLEAC=1;MLEAF=0.500;MQ=60.00;MQRankSum=0.000;QD=17.59;ReadPosRankSum=-0.266;SOR=0.028	GT:AD:DP:GQ:PL	0/1:10,18:28:99:500,0,265	4	2.38572	2.69018	0.980606	1.77594	1.87856	0.333424
d225006	Ib	CG9743	FBgn0039756	-1	3R:30196715	0.8125	3R	30196715	G	A	CT	FALSE	17	389.6	AC=1;AF=0.500;AN=2;BaseQRankSum=-2.464;DP=17;ExcessHet=3.0103;FS=6.021;MLEAC=1;MLEAF=0.500;MQ=60.00;MQRankSum=0.000;QD=24.35;ReadPosRankSum=2.195;SOR=0.078	GT:AD:DP:GQ:PL	0/1:3,13:16:81:397,0,81	4	2.09625	3.69448	0.234003	1.02718	1.08195	0.333424
d225006	Ib	CG9743	FBgn0039756	-1	3R:30196912	0.454545	3R	30196912	G	C	CG	FALSE	22	316.6	AC=1;AF=0.500;AN=2;BaseQRankSum=1.404;DP=22;ExcessHet=3.0103;FS=7.908;MLEAC=1;MLEAF=0.500;MQ=60.00;MQRankSum=0.000;QD=14.39;ReadPosRankSum=0.859;SOR=2.712	GT:AD:DP:GQ:PL	0/1:12,10:22:99:324,0,316	4	2.09625	3.69448	0.234003	1.02718	1.08195	0.333424
d225006	Ib	CG9743	FBgn0039756	-1	3R:30197276	0.470588	3R	30197276	G	A	CT	FALSE	34	480.6	AC=1;AF=0.500;AN=2;BaseQRankSum=-3.515;DP=34;ExcessHet=3.0103;FS=3.041;MLEAC=1;MLEAF=0.500;MQ=60.00;MQRankSum=0.000;QD=14.14;ReadPosRankSum=0.088;SOR=1.302	GT:AD:DP:GQ:PL	0/1:18,16:34:99:488,0,551	4	2.09625	3.69448	0.234003	1.02718	1.08195	0.333424
d225006	Ib	CG9743	FBgn0039756	-1	3R:30197375	0.647059	3R	30197375	C	T	GA	FALSE	17	316.6	AC=1;AF=0.500;AN=2;BaseQRankSum=-3.345;DP=17;ExcessHet=3.0103;FS=2.077;MLEAC=1;MLEAF=0.500;MQ=60.00;MQRankSum=0.000;QD=18.62;ReadPosRankSum=-0.303;SOR=0.543	GT:AD:DP:GQ:PL	0/1:6,11:17:99:324,0,180	4	2.09625	3.69448	0.234003	1.02718	1.08195	0.333424
d225006	Ib	CG9743	FBgn0039756	-1	3R:30198525	0.535714	3R	30198525	G	A	CT	FALSE	28	400.6	AC=1;AF=0.500;AN=2;BaseQRankSum=-4.318;DP=28;ExcessHet=3.0103;FS=0.000;MLEAC=1;MLEAF=0.500;MQ=60.00;MQRankSum=0.000;QD=14.31;ReadPosRankSum=2.494;SOR=0.914	GT:AD:DP:GQ:PL	0/1:13,15:28:99:408,0,417	4	2.09625	3.69448	0.234003	1.02718	1.08195	0.333424
d225006	Ib	CG9743	FBgn0039756	-1	3R:30198790	0.566667	3R	30198790	A	C	TG	FALSE	30	517.6	AC=1;AF=0.500;AN=2;BaseQRankSum=2.678;DP=30;ExcessHet=3.0103;FS=0.000;MLEAC=1;MLEAF=0.500;MQ=60.00;MQRankSum=0.000;QD=17.25;ReadPosRankSum=-0.776;SOR=0.551	GT:AD:DP:GQ:PL	0/1:13,17:30:99:525,0,376	4	2.09625	3.69448	0.234003	1.02718	1.08195	0.333424
d225006	Ib	heca	FBgn0010113	1	3R:30366210	1	3R	30366210	A	T	AT	FALSE	21	697.03	AC=2;AF=1.00;AN=2;DP=21;ExcessHet=3.0103;FS=0.000;MLEAC=2;MLEAF=1.00;MQ=60.00;QD=33.19;SOR=1.828	GT:AD:DP:GQ:PL	1/1:0,21:21:63:711,63,0	4	3.65717	4.55384	0.0179205	1.24003	1.45922	0.333424
d225006	Ib	Fer2LCH	FBgn0015221	1	3R:30390223	0.518182	3R	30390223	G	A	GA	FALSE	550	7824.6	AC=1;AF=0.500;AN=2;BaseQRankSum=-15.200;DP=550;ExcessHet=3.0103;FS=2.461;MLEAC=1;MLEAF=0.500;MQ=60.00;MQRankSum=0.000;QD=14.23;ReadPosRankSum=-2.491;SOR=0.536	GT:AD:DP:GQ:PL	0/1:265,285:550:99:7832,0,8064	4	9.06256	8.93053	0.802967	7.99417	7.64306	0.333424
d225006	Ib	tmod	FBgn0082582	1	3R:30577483	0.344262	3R	30577483	T	C	TC	FALSE	61	742.6	AC=1;AF=0.500;AN=2;BaseQRankSum=4.007;DP=61;ExcessHet=3.0103;FS=27.234;MLEAC=1;MLEAF=0.500;MQ=60.00;MQRankSum=0.000;QD=12.17;ReadPosRankSum=0.328;SOR=3.816	GT:AD:DP:GQ:PL	0/1:40,21:61:99:750,0,1616	4	5.81165	6.22782	0.293856	5.59956	5.11275	0.333424
d225006	Ib	zfh1	FBgn0004606	1	3R:30773703	0.545455	3R	30773703	T	C	TC	FALSE	11	136.6	AC=1;AF=0.500;AN=2;BaseQRankSum=-0.194;DP=11;ExcessHet=3.0103;FS=0.000;MLEAC=1;MLEAF=0.500;MQ=60.00;MQRankSum=0.000;QD=12.42;ReadPosRankSum=0.702;SOR=0.941	GT:AD:DP:GQ:PL	0/1:5,6:11:99:144,0,108	4	2.8207	5.07174	8.83719e-10	1.00111	0.940925	0.333424
d225006	Ib	zfh1	FBgn0004606	1	3R:30786104	0.785714	3R	30786104	C	A	CA	FALSE	28	637.6	AC=1;AF=0.500;AN=2;BaseQRankSum=0.088;DP=28;ExcessHet=3.0103;FS=7.067;MLEAC=1;MLEAF=0.500;MQ=60.00;MQRankSum=0.000;QD=22.77;ReadPosRankSum=-0.197;SOR=0.105	GT:AD:DP:GQ:PL	0/1:6,22:28:81:645,0,81	4	2.8207	5.07174	8.83719e-10	1.00111	0.940925	0.333424
d225006	Ib	zfh1	FBgn0004606	1	3R:30786452	0.555556	3R	30786452	G	A	GA	FALSE	27	390.6	AC=1;AF=0.500;AN=2;BaseQRankSum=-1.954;DP=27;ExcessHet=3.0103;FS=1.510;MLEAC=1;MLEAF=0.500;MQ=60.00;MQRankSum=0.000;QD=14.47;ReadPosRankSum=2.027;SOR=1.061	GT:AD:DP:GQ:PL	0/1:12,15:27:99:398,0,342	4	2.8207	5.07174	8.83719e-10	1.00111	0.940925	0.333424
d225006	Ib	zfh1	FBgn0004606	1	3R:30786787	0.625	3R	30786787	G	A	GA	FALSE	24	397.6	AC=1;AF=0.500;AN=2;BaseQRankSum=-3.184;DP=24;ExcessHet=3.0103;FS=0.000;MLEAC=1;MLEAF=0.500;MQ=60.00;MQRankSum=0.000;QD=16.57;ReadPosRankSum=-0.269;SOR=0.593	GT:AD:DP:GQ:PL	0/1:9,15:24:99:405,0,327	4	2.8207	5.07174	8.83719e-10	1.00111	0.940925	0.333424
d225006	Ib	zfh1	FBgn0004606	1	3R:30787306	0.944444	3R	30787306	G	A	GA	FALSE	18	491.91	AC=2;AF=1.00;AN=2;BaseQRankSum=-1.624;DP=18;ExcessHet=3.0103;FS=4.102;MLEAC=2;MLEAF=1.00;MQ=60.00;MQRankSum=0.000;QD=27.33;ReadPosRankSum=-0.393;SOR=1.160	GT:AD:DP:GQ:PL	1/1:1,17:18:16:506,16,0	4	2.8207	5.07174	8.83719e-10	1.00111	0.940925	0.333424
d225006	Ib	zfh1	FBgn0004606	1	3R:30787451	0.72	3R	30787451	T	A	TA	FALSE	25	407.6	AC=1;AF=0.500;AN=2;BaseQRankSum=0.337;DP=25;ExcessHet=3.0103;FS=0.000;MLEAC=1;MLEAF=0.500;MQ=60.00;MQRankSum=0.000;QD=16.30;ReadPosRankSum=0.982;SOR=0.551	GT:AD:DP:GQ:PL	0/1:7,18:25:99:415,0,128	4	2.8207	5.07174	8.83719e-10	1.00111	0.940925	0.333424
d225006	Ib	zfh1	FBgn0004606	1	3R:30789005	0.166667	3R	30789005	T	C	TC	FALSE	42	142.6	AC=1;AF=0.500;AN=2;BaseQRankSum=1.199;DP=42;ExcessHet=3.0103;FS=1.606;MLEAC=1;MLEAF=0.500;MQ=60.00;MQRankSum=0.000;QD=3.40;ReadPosRankSum=0.915;SOR=0.826	GT:AD:DP:GQ:PL	0/1:35,7:42:99:150,0,1500	4	2.8207	5.07174	8.83719e-10	1.00111	0.940925	0.333424
d225006	Ib	dj-1beta	FBgn0039802	1	3R:30807188	0.326923	3R	30807188	G	A	GA	FALSE	266	1955.6	AC=1;AF=0.500;AN=2;BaseQRankSum=-1.647;DP=266;ExcessHet=3.0103;FS=4.122;MLEAC=1;MLEAF=0.500;MQ=60.00;MQRankSum=0.000;QD=7.52;ReadPosRankSum=2.092;SOR=0.990	GT:AD:DP:GQ:PL	0/1:175,85:260:99:1963,0,4817	4	6.22213	6.28987	0.941462	5.54297	5.84859	0.333424
d225006	Ib	dj-1beta	FBgn0039802	1	3R:30807480	0.384354	3R	30807480	C	T	CT	FALSE	649	5390.6	AC=1;AF=0.500;AN=2;BaseQRankSum=-11.421;DP=649;ExcessHet=3.0103;FS=1.779;MLEAC=1;MLEAF=0.500;MQ=60.00;MQRankSum=0.000;QD=9.17;ReadPosRankSum=1.279;SOR=0.560	GT:AD:DP:GQ:PL	0/1:362,226:588:99:5398,0,11121	4	6.22213	6.28987	0.941462	5.54297	5.84859	0.333424
d225006	Ib	dj-1beta	FBgn0039802	1	3R:30807875	0.332326	3R	30807875	T	G	TG	FALSE	331	3169.6	AC=1;AF=0.500;AN=2;BaseQRankSum=11.730;DP=331;ExcessHet=3.0103;FS=33.014;MLEAC=1;MLEAF=0.500;MQ=60.00;MQRankSum=0.000;QD=9.58;ReadPosRankSum=-0.150;SOR=0.103	GT:AD:DP:GQ:PL	0/1:221,110:331:99:3177,0,6417	4	6.22213	6.28987	0.941462	5.54297	5.84859	0.333424
d225006	Ib	dj-1beta	FBgn0039802	1	3R:30807920	0.430147	3R	30807920	T	C	TC	FALSE	272	3368.6	AC=1;AF=0.500;AN=2;BaseQRankSum=9.645;DP=272;ExcessHet=3.0103;FS=36.511;MLEAC=1;MLEAF=0.500;MQ=60.00;MQRankSum=0.000;QD=12.38;ReadPosRankSum=-1.672;SOR=0.100	GT:AD:DP:GQ:PL	0/1:155,117:272:99:3376,0,4097	4	6.22213	6.28987	0.941462	5.54297	5.84859	0.333424
d225006	Ib	dj-1beta	FBgn0039802	1	3R:30807964	0.742188	3R	30807964	A	C	AC	FALSE	128	2957.6	AC=1;AF=0.500;AN=2;BaseQRankSum=4.538;DP=128;ExcessHet=3.0103;FS=13.891;MLEAC=1;MLEAF=0.500;MQ=60.00;MQRankSum=0.000;QD=23.11;ReadPosRankSum=3.033;SOR=0.068	GT:AD:DP:GQ:PL	0/1:33,95:128:99:2965,0,721	4	6.22213	6.28987	0.941462	5.54297	5.84859	0.333424
d225006	Ib	cindr	FBgn0027598	1	3R:30808701	0.648148	3R	30808701	C	A	CA	FALSE	54	925.6	AC=1;AF=0.500;AN=2;BaseQRankSum=-0.259;DP=54;ExcessHet=3.0103;FS=4.461;MLEAC=1;MLEAF=0.500;MQ=60.00;MQRankSum=0.000;QD=17.14;ReadPosRankSum=0.555;SOR=0.234	GT:AD:DP:GQ:PL	0/1:19,35:54:99:933,0,377	4	3.79459	4.09584	0.742166	2.21586	2.35913	0.333424
d225006	Ib	cindr	FBgn0027598	1	3R:30808716	0.673913	3R	30808716	A	T	AT	FALSE	46	881.6	AC=1;AF=0.500;AN=2;BaseQRankSum=1.746;DP=46;ExcessHet=3.0103;FS=6.777;MLEAC=1;MLEAF=0.500;MQ=60.00;MQRankSum=0.000;QD=19.17;ReadPosRankSum=0.355;SOR=0.179	GT:AD:DP:GQ:PL	0/1:15,31:46:99:889,0,353	4	3.79459	4.09584	0.742166	2.21586	2.35913	0.333424
d225006	Ib	cindr	FBgn0027598	1	3R:30808815	0.568966	3R	30808815	C	G	CG	FALSE	58	872.6	AC=1;AF=0.500;AN=2;BaseQRankSum=-3.421;DP=58;ExcessHet=3.0103;FS=0.000;MLEAC=1;MLEAF=0.500;MQ=60.00;MQRankSum=0.000;QD=15.04;ReadPosRankSum=-0.883;SOR=0.610	GT:AD:DP:GQ:PL	0/1:25,33:58:99:880,0,734	4	3.79459	4.09584	0.742166	2.21586	2.35913	0.333424
d225006	Ib	cindr	FBgn0027598	1	3R:30808849	0.541667	3R	30808849	C	A	CA	FALSE	48	662.6	AC=1;AF=0.500;AN=2;BaseQRankSum=-5.131;DP=48;ExcessHet=3.0103;FS=0.000;MLEAC=1;MLEAF=0.500;MQ=60.00;MQRankSum=0.000;QD=13.80;ReadPosRankSum=-0.166;SOR=0.797	GT:AD:DP:GQ:PL	0/1:22,26:48:99:670,0,671	4	3.79459	4.09584	0.742166	2.21586	2.35913	0.333424
d225006	Ib	cindr	FBgn0027598	1	3R:30808926	0.52381	3R	30808926	G	T	GT	FALSE	21	344.6	AC=1;AF=0.500;AN=2;BaseQRankSum=0.392;DP=21;ExcessHet=3.0103;FS=0.000;MLEAC=1;MLEAF=0.500;MQ=60.00;MQRankSum=0.000;QD=16.41;ReadPosRankSum=-0.533;SOR=0.818	GT:AD:DP:GQ:PL	0/1:10,11:21:99:352,0,224	4	3.79459	4.09584	0.742166	2.21586	2.35913	0.333424
d225006	Ib	cindr	FBgn0027598	1	3R:30809018	0.606061	3R	30809018	G	A	GA	FALSE	33	788.6	AC=1;AF=0.500;AN=2;BaseQRankSum=-4.757;DP=33;ExcessHet=3.0103;FS=0.000;MLEAC=1;MLEAF=0.500;MQ=60.00;MQRankSum=0.000;QD=23.90;ReadPosRankSum=-1.486;SOR=1.179	GT:AD:DP:GQ:PL	0/1:13,20:33:99:796,0,479	4	3.79459	4.09584	0.742166	2.21586	2.35913	0.333424
d225006	Ib	cindr	FBgn0027598	1	3R:30809019	0.606061	3R	30809019	C	G	CG	FALSE	33	788.6	AC=1;AF=0.500;AN=2;BaseQRankSum=3.438;DP=33;ExcessHet=3.0103;FS=0.000;MLEAC=1;MLEAF=0.500;MQ=60.00;MQRankSum=0.000;QD=23.90;ReadPosRankSum=-1.486;SOR=1.179	GT:AD:DP:GQ:PL	0/1:13,20:33:99:796,0,479	4	3.79459	4.09584	0.742166	2.21586	2.35913	0.333424
d225006	Ib	cindr	FBgn0027598	1	3R:30809037	0.555556	3R	30809037	G	A	GA	FALSE	18	388.6	AC=1;AF=0.500;AN=2;BaseQRankSum=-2.210;DP=18;ExcessHet=3.0103;FS=0.000;MLEAC=1;MLEAF=0.500;MQ=60.00;MQRankSum=0.000;QD=21.59;ReadPosRankSum=1.424;SOR=0.914	GT:AD:DP:GQ:PL	0/1:8,10:18:99:396,0,306	4	3.79459	4.09584	0.742166	2.21586	2.35913	0.333424
d225006	Ib	5-HT7	FBgn0004573	-1	3R:30968622	1	3R	30968622	A	G	TC	FALSE	14	516.03	AC=2;AF=1.00;AN=2;DP=14;ExcessHet=3.0103;FS=0.000;MLEAC=2;MLEAF=1.00;MQ=60.00;QD=30.17;SOR=1.765	GT:AD:DP:GQ:PL	1/1:0,14:14:42:530,42,0	4	2.11725	0.538474	5.53295e-05	0.0501364	0.0352084	0.333424
d225006	Ib	Chchd3	FBgn0010808	-1	3R:31052670	0.544304	3R	31052670	A	G	TC	FALSE	79	1205.6	AC=1;AF=0.500;AN=2;BaseQRankSum=3.899;DP=79;ExcessHet=3.0103;FS=0.000;MLEAC=1;MLEAF=0.500;MQ=60.00;MQRankSum=0.000;QD=15.26;ReadPosRankSum=-1.288;SOR=0.473	GT:AD:DP:GQ:PL	0/1:36,43:79:99:1213,0,916	4	5.13013	5.1048	0.874422	5.18415	5.24493	0.333424
d225006	Ib	Chchd3	FBgn0010808	-1	3R:31052703	0.431373	3R	31052703	A	C	TG	FALSE	102	1235.6	AC=1;AF=0.500;AN=2;BaseQRankSum=4.259;DP=102;ExcessHet=3.0103;FS=1.202;MLEAC=1;MLEAF=0.500;MQ=60.00;MQRankSum=0.000;QD=12.11;ReadPosRankSum=-0.448;SOR=0.433	GT:AD:DP:GQ:PL	0/1:58,44:102:99:1243,0,1676	4	5.13013	5.1048	0.874422	5.18415	5.24493	0.333424
d225006	Ib	Chchd3	FBgn0010808	-1	3R:31052800	0.441667	3R	31052800	A	G	TC	FALSE	120	1617.6	AC=1;AF=0.500;AN=2;BaseQRankSum=7.528;DP=120;ExcessHet=3.0103;FS=3.644;MLEAC=1;MLEAF=0.500;MQ=60.00;MQRankSum=0.000;QD=13.48;ReadPosRankSum=-1.506;SOR=0.412	GT:AD:DP:GQ:PL	0/1:67,53:120:99:1625,0,1652	4	5.13013	5.1048	0.874422	5.18415	5.24493	0.333424
d225006	Ib	Chchd3	FBgn0010808	-1	3R:31052844	0.521429	3R	31052844	A	T	TA	FALSE	140	1806.6	AC=1;AF=0.500;AN=2;BaseQRankSum=-6.372;DP=140;ExcessHet=3.0103;FS=4.053;MLEAC=1;MLEAF=0.500;MQ=60.00;MQRankSum=0.000;QD=12.90;ReadPosRankSum=-2.872;SOR=1.058	GT:AD:DP:GQ:PL	0/1:67,73:140:99:1814,0,1767	4	5.13013	5.1048	0.874422	5.18415	5.24493	0.333424
d225006	Ib	Chchd3	FBgn0010808	-1	3R:31052880	0.442424	3R	31052880	A	C	TG	FALSE	165	2050.6	AC=1;AF=0.500;AN=2;BaseQRankSum=5.702;DP=165;ExcessHet=3.0103;FS=2.832;MLEAC=1;MLEAF=0.500;MQ=60.00;MQRankSum=0.000;QD=12.43;ReadPosRankSum=3.223;SOR=0.951	GT:AD:DP:GQ:PL	0/1:92,73:165:99:2058,0,2483	4	5.13013	5.1048	0.874422	5.18415	5.24493	0.333424
d225006	Ib	mRpL32	FBgn0039835	1	3R:31253142	1	3R	31253142	T	A	TA	FALSE	13	434.02	AC=2;AF=1.00;AN=2;DP=13;ExcessHet=3.0103;FS=0.000;MLEAC=2;MLEAF=1.00;MQ=60.00;QD=33.39;SOR=2.147	GT:AD:DP:GQ:PL	1/1:0,13:13:39:448,39,0	4	2.49773	3.27599	0.876728	1.35927	1.34085	0.333424
d225006	Ib	CycG	FBgn0039858	-1	3R:31600574	0.396104	3R	31600574	G	A	CT	FALSE	154	1444.6	AC=1;AF=0.500;AN=2;BaseQRankSum=-8.982;DP=154;ExcessHet=3.0103;FS=0.000;MLEAC=1;MLEAF=0.500;MQ=60.00;MQRankSum=0.000;QD=9.38;ReadPosRankSum=0.397;SOR=0.663	GT:AD:DP:GQ:PL	0/1:93,61:154:99:1452,0,3048	4	6.749	7.09638	0.463947	5.43584	5.80647	0.333424
d225006	Ib	CycG	FBgn0039858	-1	3R:31609571	0.409091	3R	31609571	C	A	GT	FALSE	22	220.6	AC=1;AF=0.500;AN=2;BaseQRankSum=-2.125;DP=22;ExcessHet=3.0103;FS=0.000;MLEAC=1;MLEAF=0.500;MQ=60.00;MQRankSum=0.000;QD=10.03;ReadPosRankSum=-0.975;SOR=0.791	GT:AD:DP:GQ:PL	0/1:13,9:22:99:228,0,412	4	6.749	7.09638	0.463947	5.43584	5.80647	0.333424
d225006	Ib	eEF1alpha2	FBgn0000557	1	3R:31742823	0.455446	3R	31742823	C	T	CT	FALSE	101	1283.6	AC=1;AF=0.500;AN=2;BaseQRankSum=-6.126;DP=101;ExcessHet=3.0103;FS=1.740;MLEAC=1;MLEAF=0.500;MQ=60.00;MQRankSum=0.000;QD=12.71;ReadPosRankSum=1.683;SOR=0.906	GT:AD:DP:GQ:PL	0/1:55,46:101:99:1291,0,1752	4	8.41437	8.53635	0.934398	0.57658	0.553481	0.333424
d225006	Ib	mod	FBgn0002780	1	3R:32054073	0.205882	3R	32054073	C	T	CT	FALSE	35	88.6	AC=1;AF=0.500;AN=2;BaseQRankSum=-2.538;DP=35;ExcessHet=3.0103;FS=3.873;MLEAC=1;MLEAF=0.500;MQ=60.00;MQRankSum=0.000;QD=2.61;ReadPosRankSum=0.497;SOR=0.661	GT:AD:DP:GQ:PL	0/1:27,7:34:96:96,0,837	4	4.72092	4.44915	0.873376	1.89138	2.05349	0.333424
d225006	Ib	cpx	FBgn0041605	1	3R:4297487	1	3R	4297487	G	A	GA	FALSE	12	402.02	AC=2;AF=1.00;AN=2;DP=12;ExcessHet=3.0103;FS=0.000;MLEAC=2;MLEAF=1.00;MQ=60.00;QD=33.50;SOR=1.981	GT:AD:DP:GQ:PL	1/1:0,12:12:36:416,36,0	4	7.90852	7.29727	0.637321	0.177459	0.228242	0.333424
d225006	Ib	CG9776	FBgn0027866	-1	3R:4327955	0.192308	3R	4327955	G	A	CT	FALSE	26	139.6	AC=1;AF=0.500;AN=2;BaseQRankSum=-2.270;DP=26;ExcessHet=3.0103;FS=12.784;MLEAC=1;MLEAF=0.500;MQ=60.00;MQRankSum=0.000;QD=5.37;ReadPosRankSum=-1.706;SOR=3.607	GT:AD:DP:GQ:PL	0/1:21,5:26:99:147,0,4134	4	1.91917	1.47521	0.0215595	0.874673	0.872167	0.333424
d225006	Ib	CG10098	FBgn0037472	1	3R:7124741	0.114583	3R	7124741	G	A	GA	FALSE	96	37.6	AC=1;AF=0.500;AN=2;BaseQRankSum=-3.255;DP=96;ExcessHet=3.0103;FS=2.840;MLEAC=1;MLEAF=0.500;MQ=60.00;MQRankSum=0.000;QD=0.39;ReadPosRankSum=-1.739;SOR=0.348	GT:AD:DP:GQ:PL	0/1:85,11:96:45:45,0,2538	4	7.56827	7.95228	0.660138	1.89634	2.58499	0.333424
d225006	Ib	cac	FBgn0263111	-1	X:11933981	0.724138	X	11933981	G	C	CG	FALSE	29	847.6	AC=1;AF=0.500;AN=2;BaseQRankSum=-2.308;DP=29;ExcessHet=3.0103;FS=37.699;MLEAC=1;MLEAF=0.500;MQ=60.00;MQRankSum=0.000;QD=29.23;ReadPosRankSum=-0.345;SOR=3.796	GT:AD:DP:GQ:PL	0/1:8,21:29:99:855,0,315	4	4.16093	4.30898	0.905929	0.0597302	0.0545455	0.333424
d225006	Ib	cac	FBgn0263111	-1	X:11933987	0.677419	X	11933987	A	T	TA	FALSE	31	844.6	AC=1;AF=0.500;AN=2;BaseQRankSum=1.738;DP=31;ExcessHet=3.0103;FS=28.869;MLEAC=1;MLEAF=0.500;MQ=60.00;MQRankSum=0.000;QD=27.25;ReadPosRankSum=-0.809;SOR=3.800	GT:AD:DP:GQ:PL	0/1:10,21:31:99:852,0,357	4	4.16093	4.30898	0.905929	0.0597302	0.0545455	0.333424
d225006	Ib	cac	FBgn0263111	-1	X:11933988	0.666667	X	11933988	G	A	CT	FALSE	30	844.6	AC=1;AF=0.500;AN=2;BaseQRankSum=1.400;DP=30;ExcessHet=3.0103;FS=27.806;MLEAC=1;MLEAF=0.500;MQ=60.00;MQRankSum=0.000;QD=28.15;ReadPosRankSum=-0.999;SOR=3.698	GT:AD:DP:GQ:PL	0/1:10,20:30:99:852,0,357	4	4.16093	4.30898	0.905929	0.0597302	0.0545455	0.333424
d225006	Ib	cac	FBgn0263111	-1	X:11933995	0.565217	X	11933995	A	G	TC	FALSE	23	508.6	AC=1;AF=0.500;AN=2;BaseQRankSum=1.793;DP=23;ExcessHet=3.0103;FS=18.842;MLEAC=1;MLEAF=0.500;MQ=60.00;MQRankSum=0.000;QD=22.11;ReadPosRankSum=-2.881;SOR=2.788	GT:AD:DP:GQ:PL	0/1:10,13:23:99:516,0,381	4	4.16093	4.30898	0.905929	0.0597302	0.0545455	0.333424
d225006	Ib	cac	FBgn0263111	-1	X:11933998	0.473684	X	11933998	T	G	AC	FALSE	19	508.6	AC=1;AF=0.500;AN=2;BaseQRankSum=1.322;DP=19;ExcessHet=3.0103;FS=17.041;MLEAC=1;MLEAF=0.500;MQ=60.00;MQRankSum=0.000;QD=26.77;ReadPosRankSum=-2.966;SOR=3.020	GT:AD:DP:GQ:PL	0/1:10,9:19:99:516,0,381	4	4.16093	4.30898	0.905929	0.0597302	0.0545455	0.333424
d225006	Ib	cac	FBgn0263111	-1	X:11933999	0.470588	X	11933999	T	A	AT	FALSE	17	382.6	AC=1;AF=0.500;AN=2;BaseQRankSum=0.554;DP=17;ExcessHet=3.0103;FS=20.434;MLEAC=1;MLEAF=0.500;MQ=60.00;MQRankSum=0.000;QD=22.51;ReadPosRankSum=-4.101;SOR=4.398	GT:AD:DP:GQ:PL	0/1:9,8:17:99:390,0,390	4	4.16093	4.30898	0.905929	0.0597302	0.0545455	0.333424
d225006	Ib	Pdcd4	FBgn0030520	-1	X:13746668	0.366667	X	13746668	G	T	CA	FALSE	30	183.6	AC=1;AF=0.500;AN=2;BaseQRankSum=-2.321;DP=30;ExcessHet=3.0103;FS=32.186;MLEAC=1;MLEAF=0.500;MQ=60.00;MQRankSum=0.000;QD=6.12;ReadPosRankSum=-2.902;SOR=4.972	GT:AD:DP:GQ:PL	0/1:19,11:30:99:191,0,564	4	6.3931	6.81497	0.260571	3.82807	4.08621	0.333424
d225006	Ib	RpS19a	FBgn0010412	1	X:16638920	0.58209	X	16638920	T	A	TA	FALSE	74	535.64	AC=1;AF=0.500;AN=2;BaseQRankSum=0.612;DP=74;ExcessHet=3.0103;FS=8.224;MLEAC=1;MLEAF=0.500;MQ=60.00;MQRankSum=0.000;QD=7.99;ReadPosRankSum=0.370;SOR=2.833	GT:AD:DP:GQ:PL	0/1:28,39:67:99:543,0,903	4	12.0673	11.6508	0.0205362	11.5679	11.4404	0.333424
d225006	Ib	RpS19a	FBgn0010412	1	X:16638922	0.482143	X	16638922	C	A	CA	FALSE	72	333.04	AC=1;AF=0.500;AN=2;BaseQRankSum=-3.459;DP=72;ExcessHet=3.0103;FS=9.074;MLEAC=1;MLEAF=0.500;MQ=60.00;MQRankSum=0.000;QD=5.95;ReadPosRankSum=-0.770;SOR=3.045	GT:AD:DP:GQ:PL	0/1:29,27:56:99:685,0,704	4	12.0673	11.6508	0.0205362	11.5679	11.4404	0.333424
d225006	Ib	RpS19a	FBgn0010412	1	X:16638923	0.518519	X	16638923	G	A	GA	FALSE	71	572.04	AC=1;AF=0.500;AN=2;BaseQRankSum=-3.983;DP=71;ExcessHet=3.0103;FS=6.076;MLEAC=1;MLEAF=0.500;MQ=60.00;MQRankSum=0.000;QD=10.59;ReadPosRankSum=-0.558;SOR=2.572	GT:AD:DP:GQ:PL	0/1:26,28:54:99:652,0,846	4	12.0673	11.6508	0.0205362	11.5679	11.4404	0.333424
d225006	Ib	RpS5a	FBgn0002590	-1	X:17143589	0.241379	X	17143589	A	G	TC	FALSE	31	161.6	AC=1;AF=0.500;AN=2;BaseQRankSum=2.366;DP=31;ExcessHet=3.0103;FS=0.000;MLEAC=1;MLEAF=0.500;MQ=60.00;MQRankSum=0.000;QD=5.57;ReadPosRankSum=-1.084;SOR=0.223	GT:AD:DP:GQ:PL	0/1:22,7:29:99:169,0,649	4	11.5025	11.454	0.56445	11.0228	10.8875	0.333424
d225006	Ib	Frq1	FBgn0030897	1	X:18161233	0.106061	X	18161233	G	A	GA	FALSE	66	108.6	AC=1;AF=0.500;AN=2;BaseQRankSum=-0.214;DP=66;ExcessHet=3.0103;FS=1.520;MLEAC=1;MLEAF=0.500;MQ=60.00;MQRankSum=0.000;QD=1.65;ReadPosRankSum=-0.369;SOR=0.869	GT:AD:DP:GQ:PL	0/1:59,7:66:99:116,0,3328	4	6.87486	6.93852	0.801616	0.138615	0.135627	0.333424
d225006	Ib	VhaAC39-1	FBgn0285910	1	X:3881918	0.288889	X	3881918	A	T	AT	FALSE	90	807.6	AC=1;AF=0.500;AN=2;BaseQRankSum=5.495;DP=90;ExcessHet=3.0103;FS=43.151;MLEAC=1;MLEAF=0.500;MQ=60.00;MQRankSum=0.000;QD=8.97;ReadPosRankSum=-6.083;SOR=5.733	GT:AD:DP:GQ:PL	0/1:64,26:90:99:815,0,1765	4	5.68815	5.2685	0.957171	4.01061	4.17303	0.333424
d225006	Ib	Vap33	FBgn0029687	1	X:3954063	0.119403	X	3954063	G	A	GA	FALSE	67	81.6	AC=1;AF=0.500;AN=2;BaseQRankSum=-3.322;DP=67;ExcessHet=3.0103;FS=0.000;MLEAC=1;MLEAF=0.500;MQ=60.00;MQRankSum=0.000;QD=1.22;ReadPosRankSum=2.188;SOR=0.917	GT:AD:DP:GQ:PL	0/1:59,8:67:89:89,0,2225	4	6.63427	6.82411	0.460294	4.36447	3.97039	0.333424
d225007	Ib	IA-2	FBgn0031294	-1	2L:1012323	0.378995	2L	1012323	C	G	GC	FALSE	237	1488.6	AC=1;AF=0.500;AN=2;BaseQRankSum=-6.952;DP=237;ExcessHet=3.0103;FS=302.116;MLEAC=1;MLEAF=0.500;MQ=60.00;MQRankSum=0.000;QD=6.80;ReadPosRankSum=-5.026;SOR=8.862	GT:AD:DP:GQ:PL	0/1:136,83:219:99:1496,0,3603	4	6.54402	7.83614	2.09102e-08	0.302821	0.331543	3.98732
d225007	Ib	RpL7	FBgn0005593	1	2L:10202164	0.104762	2L	10202164	C	T	CT	FALSE	112	141.6	AC=1;AF=0.500;AN=2;BaseQRankSum=-0.705;DP=112;ExcessHet=3.0103;FS=0.000;MLEAC=1;MLEAF=0.500;MQ=60.00;MQRankSum=0.000;QD=1.35;ReadPosRankSum=-0.282;SOR=0.368	GT:AD:DP:GQ:PL	0/1:94,11:105:99:149,0,3515	4	11.7293	11.7697	0.664372	11.1406	10.9857	3.98732
d225007	Ib	CG31717	FBgn0051717	1	2L:10251648	0.328042	2L	10251648	G	A	GA	FALSE	189	1529.6	AC=1;AF=0.500;AN=2;BaseQRankSum=-8.932;DP=189;ExcessHet=3.0103;FS=7.405;MLEAC=1;MLEAF=0.500;MQ=60.00;MQRankSum=0.000;QD=8.09;ReadPosRankSum=0.863;SOR=0.147	GT:AD:DP:GQ:PL	0/1:127,62:189:99:1537,0,4402	4	6.16276	6.94588	0.0485892	6.29343	5.52658	3.98732
d225007	Ib	salr	FBgn0000287	1	2L:11359194	0.530612	2L	11359194	G	A	GA	FALSE	49	685.6	AC=1;AF=0.500;AN=2;BaseQRankSum=-2.751;DP=49;ExcessHet=3.0103;FS=2.739;MLEAC=1;MLEAF=0.500;MQ=60.00;MQRankSum=0.000;QD=13.99;ReadPosRankSum=0.262;SOR=0.368	GT:AD:DP:GQ:PL	0/1:23,26:49:99:693,0,639	4	3.36969	2.9991	0.771618	0.202178	0.0214256	3.98732
d225007	Ib	ThrRS	FBgn0027081	1	2L:12105272	0.733333	2L	12105272	C	T	CT	FALSE	60	1358.6	AC=1;AF=0.500;AN=2;BaseQRankSum=-0.496;DP=60;ExcessHet=3.0103;FS=41.147;MLEAC=1;MLEAF=0.500;MQ=60.00;MQRankSum=0.000;QD=22.64;ReadPosRankSum=0.798;SOR=1.074	GT:AD:DP:GQ:PL	0/1:16,44:60:99:1366,0,394	4	5.11791	5.14664	0.914631	2.22626	2.05694	3.98732
d225007	Ib	ThrRS	FBgn0027081	1	2L:12106057	1	2L	12106057	T	C	TC	FALSE	61	2150.03	AC=2;AF=1.00;AN=2;DP=61;ExcessHet=3.0103;FS=0.000;MLEAC=2;MLEAF=1.00;MQ=60.00;QD=33.15;SOR=1.022	GT:AD:DP:GQ:PL	1/1:0,61:61:99:2164,183,0	4	5.11791	5.14664	0.914631	2.22626	2.05694	3.98732
d225007	Ib	ThrRS	FBgn0027081	1	2L:12106174	1	2L	12106174	T	C	TC	FALSE	44	1584.03	AC=2;AF=1.00;AN=2;DP=44;ExcessHet=3.0103;FS=0.000;MLEAC=2;MLEAF=1.00;MQ=60.00;QD=35.05;SOR=0.883	GT:AD:DP:GQ:PL	1/1:0,44:44:99:1598,132,0	4	5.11791	5.14664	0.914631	2.22626	2.05694	3.98732
d225007	Ib	ThrRS	FBgn0027081	1	2L:12106306	1	2L	12106306	T	C	TC	FALSE	42	1451.03	AC=2;AF=1.00;AN=2;DP=42;ExcessHet=3.0103;FS=0.000;MLEAC=2;MLEAF=1.00;MQ=60.00;QD=34.55;SOR=0.693	GT:AD:DP:GQ:PL	1/1:0,42:42:99:1465,126,0	4	5.11791	5.14664	0.914631	2.22626	2.05694	3.98732
d225007	Ib	ThrRS	FBgn0027081	1	2L:12106330	1	2L	12106330	C	T	CT	FALSE	39	1193.03	AC=2;AF=1.00;AN=2;DP=39;ExcessHet=3.0103;FS=0.000;MLEAC=2;MLEAF=1.00;MQ=60.00;QD=30.59;SOR=0.968	GT:AD:DP:GQ:PL	1/1:0,39:39:99:1207,116,0	4	5.11791	5.14664	0.914631	2.22626	2.05694	3.98732
d225007	Ib	bun	FBgn0259176	-1	2L:12456418	1	2L	12456418	C	T	GA	FALSE	70	2005.03	AC=2;AF=1.00;AN=2;DP=70;ExcessHet=3.0103;FS=0.000;MLEAC=2;MLEAF=1.00;MQ=60.00;QD=28.64;SOR=0.874	GT:AD:DP:GQ:PL	1/1:0,70:70:99:2019,206,0	4	6.94439	6.97053	0.809548	5.18377	5.42671	3.98732
d225007	Ib	Syx5	FBgn0011708	1	2L:16308307	1	2L	16308307	A	C	AC	FALSE	60	2002.03	AC=2;AF=1.00;AN=2;DP=60;ExcessHet=3.0103;FS=0.000;MLEAC=2;MLEAF=1.00;MQ=60.00;QD=33.37;SOR=0.760	GT:AD:DP:GQ:PL	1/1:0,60:60:99:2016,177,0	4	2.70598	3.01385	0.697866	2.46091	2.19561	3.98732
d225007	Ib	VhaSFD	FBgn0027779	-1	2L:16723635	1	2L	16723635	G	A	CT	FALSE	39	1309.03	AC=2;AF=1.00;AN=2;DP=39;ExcessHet=3.0103;FS=0.000;MLEAC=2;MLEAF=1.00;MQ=60.00;QD=33.56;SOR=2.891	GT:AD:DP:GQ:PL	1/1:0,39:39:99:1323,117,0	4	5.66391	5.20374	0.436634	3.41702	3.56526	3.98732
d225007	Ib	VhaSFD	FBgn0027779	-1	2L:16724477	1	2L	16724477	A	G	TC	FALSE	83	2933.03	AC=2;AF=1.00;AN=2;DP=83;ExcessHet=3.0103;FS=0.000;MLEAC=2;MLEAF=1.00;MQ=60.00;QD=30.37;SOR=1.638	GT:AD:DP:GQ:PL	1/1:0,83:83:99:2947,248,0	4	5.66391	5.20374	0.436634	3.41702	3.56526	3.98732
d225007	Ib	chinmo	FBgn0086758	1	2L:1700658	0.5	2L	1700658	G	A	GA	FALSE	231	3121.6	AC=1;AF=0.500;AN=2;BaseQRankSum=-7.756;DP=231;ExcessHet=3.0103;FS=3.540;MLEAC=1;MLEAF=0.500;MQ=60.00;MQRankSum=0.000;QD=13.57;ReadPosRankSum=0.544;SOR=0.455	GT:AD:DP:GQ:PL	0/1:115,115:230:99:3129,0,4305	4	4.89124	3.28942	2.254e-05	2.01378	1.91915	3.98732
d225007	Ib	chinmo	FBgn0086758	1	2L:1702126	1	2L	1702126	T	C	TC	FALSE	56	2204.03	AC=2;AF=1.00;AN=2;DP=56;ExcessHet=3.0103;FS=0.000;MLEAC=2;MLEAF=1.00;MQ=60.00;QD=26.00;SOR=1.781	GT:AD:DP:GQ:PL	1/1:0,56:56:99:2218,168,0	4	4.89124	3.28942	2.254e-05	2.01378	1.91915	3.98732
d225007	Ib	chinmo	FBgn0086758	1	2L:1702167	1	2L	1702167	A	C	AC	FALSE	51	1772.03	AC=2;AF=1.00;AN=2;DP=51;ExcessHet=3.0103;FS=0.000;MLEAC=2;MLEAF=1.00;MQ=60.00;QD=34.75;SOR=2.746	GT:AD:DP:GQ:PL	1/1:0,51:51:99:1786,153,0	4	4.89124	3.28942	2.254e-05	2.01378	1.91915	3.98732
d225007	Ib	CG42750	FBgn0261804	-1	2L:18275581	1	2L	18275581	C	T	GA	FALSE	92	2824.03	AC=2;AF=1.00;AN=2;DP=92;ExcessHet=3.0103;FS=0.000;MLEAC=2;MLEAF=1.00;MQ=60.00;QD=30.70;SOR=0.782	GT:AD:DP:GQ:PL	1/1:0,92:92:99:2838,275,0	4	2.0103	0.971178	0.413677	0.0131953	0.0278896	3.98732
d225007	Ib	CG42750	FBgn0261804	-1	2L:18275609	1	2L	18275609	C	A	GT	FALSE	97	2882.03	AC=2;AF=1.00;AN=2;DP=97;ExcessHet=3.0103;FS=0.000;MLEAC=2;MLEAF=1.00;MQ=60.00;QD=29.71;SOR=0.892	GT:AD:DP:GQ:PL	1/1:0,97:97:99:2896,287,0	4	2.0103	0.971178	0.413677	0.0131953	0.0278896	3.98732
d225007	Ib	RpS26	FBgn0261597	-1	2L:18442538	0.421053	2L	18442538	C	A	GT	FALSE	228	2279.6	AC=1;AF=0.500;AN=2;BaseQRankSum=-9.658;DP=228;ExcessHet=3.0103;FS=6.138;MLEAC=1;MLEAF=0.500;MQ=60.00;MQRankSum=0.000;QD=10.00;ReadPosRankSum=-2.225;SOR=2.079	GT:AD:DP:GQ:PL	0/1:132,96:228:99:2287,0,4168	4	12.2899	12.334	0.846576	12.1406	11.9459	3.98732
d225007	Ib	ncm	FBgn0086707	-1	2L:18445794	1	2L	18445794	C	T	GA	FALSE	14	429.03	AC=2;AF=1.00;AN=2;DP=14;ExcessHet=3.0103;FS=0.000;MLEAC=2;MLEAF=1.00;MQ=60.00;QD=30.64;SOR=1.329	GT:AD:DP:GQ:PL	1/1:0,14:14:42:443,42,0	4	2.07645	2.29727	0.913409	1.21747	0.89689	3.98732
d225007	Ib	ncm	FBgn0086707	-1	2L:18445836	1	2L	18445836	A	G	TC	FALSE	15	527.03	AC=2;AF=1.00;AN=2;DP=15;ExcessHet=3.0103;FS=0.000;MLEAC=2;MLEAF=1.00;MQ=60.00;QD=26.14;SOR=1.112	GT:AD:DP:GQ:PL	1/1:0,15:15:45:541,45,0	4	2.07645	2.29727	0.913409	1.21747	0.89689	3.98732
d225007	Ib	COX4	FBgn0032833	1	2L:19959779	0.319224	2L	19959779	T	C	TC	FALSE	570	4937.6	AC=1;AF=0.500;AN=2;BaseQRankSum=14.466;DP=570;ExcessHet=3.0103;FS=2.945;MLEAC=1;MLEAF=0.500;MQ=60.00;MQRankSum=0.000;QD=8.71;ReadPosRankSum=-0.228;SOR=0.478	GT:AD:DP:GQ:PL	0/1:386,181:567:99:4945,0,10815	4	9.81625	9.53537	0.832239	8.74932	8.98623	3.98732
d225007	Ib	Arpc2	FBgn0032859	1	2L:20420784	1	2L	20420784	C	T	CT	FALSE	87	2347.03	AC=2;AF=1.00;AN=2;DP=87;ExcessHet=3.0103;FS=0.000;MLEAC=2;MLEAF=1.00;MQ=60.00;QD=27.61;SOR=0.867	GT:AD:DP:GQ:PL	1/1:0,85:85:99:2361,250,0	4	3.9046	4.07069	0.991144	2.77238	2.56212	3.98732
d225007	Ib	twit	FBgn0032895	1	2L:20856280	0.354244	2L	20856280	A	T	AT	FALSE	542	4583.6	AC=1;AF=0.500;AN=2;BaseQRankSum=-1.612;DP=542;ExcessHet=3.0103;FS=1.830;MLEAC=1;MLEAF=0.500;MQ=60.00;MQRankSum=0.000;QD=8.46;ReadPosRankSum=1.136;SOR=0.570	GT:AD:DP:GQ:PL	0/1:350,192:542:99:4591,0,10123	4	8.61265	7.85783	0.400253	0.434844	0.167292	3.98732
d225007	Ib	twit	FBgn0032895	1	2L:20856551	0.244444	2L	20856551	C	T	CT	FALSE	675	3175.6	AC=1;AF=0.500;AN=2;BaseQRankSum=-13.359;DP=675;ExcessHet=3.0103;FS=2.917;MLEAC=1;MLEAF=0.500;MQ=60.00;MQRankSum=0.000;QD=4.70;ReadPosRankSum=-1.475;SOR=0.973	GT:AD:DP:GQ:PL	0/1:510,165:675:99:3183,0,16816	4	8.61265	7.85783	0.400253	0.434844	0.167292	3.98732
d225007	Ib	nrv3	FBgn0032946	1	2L:21392675	0.202703	2L	21392675	G	A	GA	FALSE	74	444.6	AC=1;AF=0.500;AN=2;BaseQRankSum=-4.644;DP=74;ExcessHet=3.0103;FS=49.885;MLEAC=1;MLEAF=0.500;MQ=60.00;MQRankSum=0.000;QD=6.01;ReadPosRankSum=-1.871;SOR=5.547	GT:AD:DP:GQ:PL	0/1:59,15:74:99:452,0,2432	4	9.98583	9.36114	0.242839	0.270495	0.683618	3.98732
d225007	Ib	CG9662	FBgn0031529	-1	2L:3376197	1	2L	3376197	G	A	CT	FALSE	135	4505.03	AC=2;AF=1.00;AN=2;DP=135;ExcessHet=3.0103;FS=0.000;MLEAC=2;MLEAF=1.00;MQ=60.00;QD=33.37;SOR=1.213	GT:AD:DP:GQ:PL	1/1:0,135:135:99:4519,404,0	4	4.79971	4.26303	0.58721	2.25071	2.37554	3.98732
d225007	Ib	CG9662	FBgn0031529	-1	2L:3376230	1	2L	3376230	C	G	GC	FALSE	124	5110.03	AC=2;AF=1.00;AN=2;DP=124;ExcessHet=3.0103;FS=0.000;MLEAC=2;MLEAF=1.00;MQ=60.00;QD=35.64;SOR=0.793	GT:AD:DP:GQ:PL	1/1:0,124:124:99:5124,376,0	4	4.79971	4.26303	0.58721	2.25071	2.37554	3.98732
d225007	Ib	CG9662	FBgn0031529	-1	2L:3376254	1	2L	3376254	A	G	TC	FALSE	143	6210.03	AC=2;AF=1.00;AN=2;DP=143;ExcessHet=3.0103;FS=0.000;MLEAC=2;MLEAF=1.00;MQ=60.00;QD=32.03;SOR=1.027	GT:AD:DP:GQ:PL	1/1:0,143:143:99:6224,457,0	4	4.79971	4.26303	0.58721	2.25071	2.37554	3.98732
d225007	Ib	RpL40	FBgn0003941	1	2L:4228231	0.478206	2L	4228231	G	A	GA	FALSE	1587	21497.6	AC=1;AF=0.500;AN=2;BaseQRankSum=-21.870;DP=1587;ExcessHet=3.0103;FS=0.518;MLEAC=1;MLEAF=0.500;MQ=60.00;MQRankSum=0.000;QD=13.58;ReadPosRankSum=-2.825;SOR=0.680	GT:AD:DP:GQ:PL	0/1:826,757:1583:99:21505,0,25179	4	12.1664	12.1374	0.69258	11.4574	11.4142	3.98732
d225007	Ib	fipi	FBgn0031627	-1	2L:4738435	0.384615	2L	4738435	G	A	CT	FALSE	39	348.6	AC=1;AF=0.500;AN=2;BaseQRankSum=-1.912;DP=39;ExcessHet=3.0103;FS=1.264;MLEAC=1;MLEAF=0.500;MQ=60.00;MQRankSum=0.000;QD=8.94;ReadPosRankSum=-0.931;SOR=0.693	GT:AD:DP:GQ:PL	0/1:24,15:39:99:356,0,881	4	5.70931	5.32823	0.250204	0.307762	0.421432	3.98732
d225007	Ib	CG31650	FBgn0031673	-1	2L:5040833	0.40404	2L	5040833	C	A	GT	FALSE	99	1096.6	AC=1;AF=0.500;AN=2;BaseQRankSum=-3.499;DP=99;ExcessHet=3.0103;FS=45.039;MLEAC=1;MLEAF=0.500;MQ=60.00;MQRankSum=0.000;QD=11.08;ReadPosRankSum=2.805;SOR=2.353	GT:AD:DP:GQ:PL	0/1:59,40:99:99:1104,0,1697	4	4.95708	5.02313	0.952346	2.11362	1.73761	3.98732
d225007	Ib	CG14024	FBgn0031697	-1	2L:5312887	1	2L	5312887	G	T	CA	FALSE	18	635.03	AC=2;AF=1.00;AN=2;DP=18;ExcessHet=3.0103;FS=0.000;MLEAC=2;MLEAF=1.00;MQ=60.00;QD=34.60;SOR=1.493	GT:AD:DP:GQ:PL	1/1:0,18:18:54:649,54,0	4	4.1084	4.81184	0.222063	0.0890449	0.126785	3.98732
d225007	Ib	nrv2	FBgn0015777	-1	2L:6790466	0.546667	2L	6790466	A	G	TC	FALSE	75	1643.6	AC=1;AF=0.500;AN=2;BaseQRankSum=3.744;DP=75;ExcessHet=3.0103;FS=5.425;MLEAC=1;MLEAF=0.500;MQ=60.00;MQRankSum=0.000;QD=21.91;ReadPosRankSum=0.139;SOR=1.519	GT:AD:DP:GQ:PL	0/1:34,41:75:99:1651,0,1301	4	3.48474	2.11119	0.017969	1.38147	1.80436	3.98732
d225007	Ib	CG7781	FBgn0032021	-1	2L:8321558	0.331019	2L	8321558	C	T	GA	FALSE	434	3546.6	AC=1;AF=0.500;AN=2;BaseQRankSum=-11.091;DP=434;ExcessHet=3.0103;FS=8.836;MLEAC=1;MLEAF=0.500;MQ=60.00;MQRankSum=0.000;QD=8.21;ReadPosRankSum=0.670;SOR=0.677	GT:AD:DP:GQ:PL	0/1:289,143:432:99:3554,0,9076	4	6.7932	6.02993	0.385496	0.754282	0.71839	3.98732
d225007	Ib	RpS13	FBgn0010265	-1	2L:8363926	0.46393	2L	8363926	C	A	GT	FALSE	1710	21768.6	AC=1;AF=0.500;AN=2;BaseQRankSum=-23.467;DP=1710;ExcessHet=3.0103;FS=1.184;MLEAC=1;MLEAF=0.500;MQ=60.00;MQRankSum=0.000;QD=12.77;ReadPosRankSum=2.857;SOR=0.597	GT:AD:DP:GQ:PL	0/1:914,791:1705:99:21776,0,27813	4	12.5537	12.6411	0.256312	12.0036	11.9644	3.98732
d225007	Ib	Akap200	FBgn0027932	1	2L:8430755	0.230769	2L	8430755	C	T	CT	FALSE	208	1033.6	AC=1;AF=0.500;AN=2;BaseQRankSum=1.726;DP=208;ExcessHet=3.0103;FS=17.016;MLEAC=1;MLEAF=0.500;MQ=60.00;MQRankSum=0.000;QD=4.97;ReadPosRankSum=1.306;SOR=0.161	GT:AD:DP:GQ:PL	0/1:160,48:208:99:1041,0,4633	4	7.14929	7.38323	0.779992	2.49923	2.83286	3.98732
d225007	Ib	Gdi	FBgn0004868	-1	2L:9494388	0.629423	2L	9494388	G	A	CT	FALSE	537	9989.6	AC=1;AF=0.500;AN=2;BaseQRankSum=-7.723;DP=537;ExcessHet=3.0103;FS=2.522;MLEAC=1;MLEAF=0.500;MQ=60.00;MQRankSum=0.000;QD=18.60;ReadPosRankSum=0.467;SOR=0.541	GT:AD:DP:GQ:PL	0/1:199,338:537:99:9997,0,5377	4	8.05437	8.41484	0.842776	4.8483	4.88893	3.98732
d225007	Ib	Trx2	FBgn0040070	1	2L:9615775	0.210461	2L	9615775	G	T	GT	FALSE	809	2724.6	AC=1;AF=0.500;AN=2;BaseQRankSum=-8.878;DP=809;ExcessHet=3.0103;FS=0.000;MLEAC=1;MLEAF=0.500;MQ=60.00;MQRankSum=0.000;QD=3.39;ReadPosRankSum=0.972;SOR=0.657	GT:AD:DP:GQ:PL	0/1:634,169:803:99:2732,0,17691	4	9.69634	9.67944	0.851976	5.15857	5.52398	3.98732
d225007	Ib	Nckx30C	FBgn0028704	-1	2L:9716129	0.217391	2L	9716129	T	A	AT	FALSE	23	79.6	AC=1;AF=0.500;AN=2;BaseQRankSum=-3.403;DP=23;ExcessHet=3.0103;FS=2.682;MLEAC=1;MLEAF=0.500;MQ=60.00;MQRankSum=0.000;QD=3.46;ReadPosRankSum=-1.858;SOR=1.609	GT:AD:DP:GQ:PL	0/1:18,5:23:87:87,0,655	4	4.99389	4.09503	0.0412382	0.0832012	0.108464	3.98732
d225007	Ib	RNaseZ	FBgn0028426	-1	2R:10307378	1	2R	10307378	G	A	CT	FALSE	63	2849.03	AC=2;AF=1.00;AN=2;DP=63;ExcessHet=3.0103;FS=0.000;MLEAC=2;MLEAF=1.00;MQ=60.00;QD=23.41;SOR=6.901	GT:AD:DP:GQ:PL	1/1:0,63:63:99:2863,193,0	4	0.912224	0.704883	0.672113	0.569709	0.392617	3.98732
d225007	Ib	Galphao	FBgn0001122	1	2R:10462557	0.51087	2R	10462557	G	C	GC	FALSE	92	1391.6	AC=1;AF=0.500;AN=2;BaseQRankSum=3.132;DP=92;ExcessHet=3.0103;FS=54.474;MLEAC=1;MLEAF=0.500;MQ=60.00;MQRankSum=0.000;QD=15.13;ReadPosRankSum=-2.438;SOR=1.465	GT:AD:DP:GQ:PL	0/1:45,47:92:99:1399,0,1178	4	5.27539	5.64569	0.388493	0.648983	0.676221	3.98732
d225007	Ib	Pef	FBgn0033529	1	2R:10481675	0.374194	2R	10481675	T	G	TG	FALSE	155	2040.6	AC=1;AF=0.500;AN=2;BaseQRankSum=4.374;DP=155;ExcessHet=3.0103;FS=0.616;MLEAC=1;MLEAF=0.500;MQ=60.00;MQRankSum=0.000;QD=13.17;ReadPosRankSum=0.754;SOR=0.783	GT:AD:DP:GQ:PL	0/1:97,58:155:99:2048,0,3734	4	6.16521	6.2731	0.743747	3.74954	3.7186	3.98732
d225007	Ib	Pef	FBgn0033529	1	2R:10481682	0.381944	2R	10481682	A	T	AT	FALSE	144	2039.6	AC=1;AF=0.500;AN=2;BaseQRankSum=1.024;DP=144;ExcessHet=3.0103;FS=4.117;MLEAC=1;MLEAF=0.500;MQ=60.00;MQRankSum=0.000;QD=14.16;ReadPosRankSum=1.049;SOR=0.408	GT:AD:DP:GQ:PL	0/1:89,55:144:99:2047,0,3488	4	6.16521	6.2731	0.743747	3.74954	3.7186	3.98732
d225007	Ib	RpS15Ab	FBgn0033555	1	2R:10822076	0.277778	2R	10822076	G	A	GA	FALSE	54	303.6	AC=1;AF=0.500;AN=2;BaseQRankSum=-3.739;DP=54;ExcessHet=3.0103;FS=4.362;MLEAC=1;MLEAF=0.500;MQ=60.00;MQRankSum=0.000;QD=5.62;ReadPosRankSum=-0.765;SOR=0.976	GT:AD:DP:GQ:PL	0/1:39,15:54:99:311,0,1182	4	3.76529	3.1313	0.134754	5.69163	5.75158	3.98732
d225007	Ib	RpS15Ab	FBgn0033555	1	2R:10822209	0.264151	2R	10822209	C	A	CA	FALSE	53	388.6	AC=1;AF=0.500;AN=2;BaseQRankSum=-3.609;DP=53;ExcessHet=3.0103;FS=68.761;MLEAC=1;MLEAF=0.500;MQ=60.00;MQRankSum=0.000;QD=7.33;ReadPosRankSum=-1.350;SOR=5.416	GT:AD:DP:GQ:PL	0/1:39,14:53:99:396,0,1602	4	3.76529	3.1313	0.134754	5.69163	5.75158	3.98732
d225007	Ib	S2P	FBgn0033656	-1	2R:11843471	0.144928	2R	11843471	C	T	GA	FALSE	69	234.6	AC=1;AF=0.500;AN=2;BaseQRankSum=0.451;DP=69;ExcessHet=3.0103;FS=12.385;MLEAC=1;MLEAF=0.500;MQ=60.00;MQRankSum=0.000;QD=3.40;ReadPosRankSum=-3.443;SOR=3.100	GT:AD:DP:GQ:PL	0/1:59,10:69:99:242,0,2432	4	3.72282	3.20532	0.413677	1.64153	1.57763	3.98732
d225007	Ib	S2P	FBgn0033656	-1	2R:11843475	0.142857	2R	11843475	A	T	TA	FALSE	70	225.6	AC=1;AF=0.500;AN=2;BaseQRankSum=-3.308;DP=70;ExcessHet=3.0103;FS=12.638;MLEAC=1;MLEAF=0.500;MQ=60.00;MQRankSum=0.000;QD=3.22;ReadPosRankSum=-2.050;SOR=3.204	GT:AD:DP:GQ:PL	0/1:60,10:70:99:233,0,2532	4	3.72282	3.20532	0.413677	1.64153	1.57763	3.98732
d225007	Ib	Oda	FBgn0014184	-1	2R:12166767	0.189591	2R	12166767	C	T	GA	FALSE	269	826.6	AC=1;AF=0.500;AN=2;BaseQRankSum=-8.404;DP=269;ExcessHet=3.0103;FS=5.421;MLEAC=1;MLEAF=0.500;MQ=60.00;MQRankSum=0.000;QD=3.07;ReadPosRankSum=1.526;SOR=0.310	GT:AD:DP:GQ:PL	0/1:218,51:269:99:834,0,7145	4	9.15983	8.84911	0.10518	9.45199	9.25043	3.98732
d225007	Ib	Oda	FBgn0014184	-1	2R:12167169	0.658703	2R	12167169	C	T	GA	FALSE	294	5816.6	AC=1;AF=0.500;AN=2;BaseQRankSum=-8.241;DP=294;ExcessHet=3.0103;FS=2.526;MLEAC=1;MLEAF=0.500;MQ=60.00;MQRankSum=0.000;QD=19.85;ReadPosRankSum=-0.762;SOR=0.901	GT:AD:DP:GQ:PL	0/1:100,193:293:99:5824,0,2580	4	9.15983	8.84911	0.10518	9.45199	9.25043	3.98732
d225007	Ib	RpS11	FBgn0033699	-1	2R:12200182	0.495	2R	12200182	A	G	TC	FALSE	1200	18323.6	AC=1;AF=0.500;AN=2;BaseQRankSum=21.002;DP=1200;ExcessHet=3.0103;FS=1.769;MLEAC=1;MLEAF=0.500;MQ=60.00;MQRankSum=0.000;QD=15.27;ReadPosRankSum=0.210;SOR=0.565	GT:AD:DP:GQ:PL	0/1:606,594:1200:99:18331,0,15737	4	11.6992	11.5734	0.0283431	11.6744	11.5512	3.98732
d225007	Ib	Galphaq	FBgn0004435	1	2R:12613775	1	2R	12613775	A	T	AT	FALSE	168	5537.03	AC=2;AF=1.00;AN=2;DP=168;ExcessHet=3.0103;FS=0.000;MLEAC=2;MLEAF=1.00;MQ=60.00;QD=32.96;SOR=1.770	GT:AD:DP:GQ:PL	1/1:0,168:168:99:5551,502,0	4	4.30852	4.11752	0.995742	1.74037	1.60284	3.98732
d225007	Ib	Galphaq	FBgn0004435	1	2R:12613986	1	2R	12613986	C	T	CT	FALSE	56	2413.03	AC=2;AF=1.00;AN=2;DP=56;ExcessHet=3.0103;FS=0.000;MLEAC=2;MLEAF=1.00;MQ=60.00;QD=30.88;SOR=1.781	GT:AD:DP:GQ:PL	1/1:0,56:56:99:2427,169,0	4	4.30852	4.11752	0.995742	1.74037	1.60284	3.98732
d225007	Ib	nemy	FBgn0261673	-1	2R:12660077	0.464789	2R	12660077	G	A	CT	FALSE	71	884.6	AC=1;AF=0.500;AN=2;BaseQRankSum=-3.320;DP=71;ExcessHet=3.0103;FS=0.000;MLEAC=1;MLEAF=0.500;MQ=60.00;MQRankSum=0.000;QD=12.46;ReadPosRankSum=-1.191;SOR=0.784	GT:AD:DP:GQ:PL	0/1:38,33:71:99:892,0,1163	4	2.14477	1.22614	0.010529	1.66041	1.71026	3.98732
d225007	Ib	nemy	FBgn0261673	-1	2R:12660178	0.454545	2R	12660178	C	T	GA	FALSE	66	803.6	AC=1;AF=0.500;AN=2;BaseQRankSum=-5.024;DP=66;ExcessHet=3.0103;FS=8.392;MLEAC=1;MLEAF=0.500;MQ=60.00;MQRankSum=0.000;QD=12.18;ReadPosRankSum=0.097;SOR=1.233	GT:AD:DP:GQ:PL	0/1:36,30:66:99:811,0,1150	4	2.14477	1.22614	0.010529	1.66041	1.71026	3.98732
d225007	Ib	CG3955	FBgn0033793	-1	2R:13128051	0.412587	2R	13128051	G	A	CT	FALSE	143	1448.6	AC=1;AF=0.500;AN=2;BaseQRankSum=-5.642;DP=143;ExcessHet=3.0103;FS=1.844;MLEAC=1;MLEAF=0.500;MQ=60.00;MQRankSum=0.000;QD=10.13;ReadPosRankSum=-1.662;SOR=0.489	GT:AD:DP:GQ:PL	0/1:84,59:143:99:1456,0,2510	4	4.54626	4.75042	0.982538	0.118374	0.14535	3.98732
d225007	Ib	CG3955	FBgn0033793	-1	2R:13128089	0.410042	2R	13128089	A	C	TG	FALSE	239	2696.6	AC=1;AF=0.500;AN=2;BaseQRankSum=5.645;DP=239;ExcessHet=3.0103;FS=6.479;MLEAC=1;MLEAF=0.500;MQ=60.00;MQRankSum=0.000;QD=11.28;ReadPosRankSum=0.583;SOR=0.373	GT:AD:DP:GQ:PL	0/1:141,98:239:99:2704,0,3834	4	4.54626	4.75042	0.982538	0.118374	0.14535	3.98732
d225007	Ib	CG3955	FBgn0033793	-1	2R:13128191	0.330855	2R	13128191	C	A	GT	FALSE	270	1815.6	AC=1;AF=0.500;AN=2;BaseQRankSum=-8.240;DP=270;ExcessHet=3.0103;FS=21.843;MLEAC=1;MLEAF=0.500;MQ=60.00;MQRankSum=0.000;QD=6.75;ReadPosRankSum=1.532;SOR=1.064	GT:AD:DP:GQ:PL	0/1:180,89:269:99:1823,0,5679	4	4.54626	4.75042	0.982538	0.118374	0.14535	3.98732
d225007	Ib	CG3955	FBgn0033793	-1	2R:13128207	0.350877	2R	13128207	G	C	CG	FALSE	228	2037.6	AC=1;AF=0.500;AN=2;BaseQRankSum=1.529;DP=228;ExcessHet=3.0103;FS=43.053;MLEAC=1;MLEAF=0.500;MQ=60.00;MQRankSum=0.000;QD=8.94;ReadPosRankSum=-0.068;SOR=1.302	GT:AD:DP:GQ:PL	0/1:148,80:228:99:2045,0,4416	4	4.54626	4.75042	0.982538	0.118374	0.14535	3.98732
d225007	Ib	CG4646	FBgn0033810	-1	2R:13219521	1	2R	13219521	A	G	TC	FALSE	18	680.03	AC=2;AF=1.00;AN=2;DP=18;ExcessHet=3.0103;FS=0.000;MLEAC=2;MLEAF=1.00;MQ=60.00;QD=27.83;SOR=5.892	GT:AD:DP:GQ:PL	1/1:0,18:18:54:694,54,0	4	2.56664	3.04089	0.50234	3.24437	2.76824	3.98732
d225007	Ib	CG4646	FBgn0033810	-1	2R:13219731	1	2R	13219731	T	A	AT	FALSE	95	2837.03	AC=2;AF=1.00;AN=2;DP=95;ExcessHet=3.0103;FS=0.000;MLEAC=2;MLEAF=1.00;MQ=60.00;QD=30.18;SOR=2.985	GT:AD:DP:GQ:PL	1/1:0,94:94:99:2851,276,0	4	2.56664	3.04089	0.50234	3.24437	2.76824	3.98732
d225007	Ib	CG4646	FBgn0033810	-1	2R:13220050	1	2R	13220050	G	A	CT	FALSE	96	3323.03	AC=2;AF=1.00;AN=2;DP=96;ExcessHet=3.0103;FS=0.000;MLEAC=2;MLEAF=1.00;MQ=60.00;QD=34.61;SOR=1.022	GT:AD:DP:GQ:PL	1/1:0,96:96:99:3337,288,0	4	2.56664	3.04089	0.50234	3.24437	2.76824	3.98732
d225007	Ib	Mp20	FBgn0002789	1	2R:13247523	1	2R	13247523	C	T	CT	FALSE	110	3215.03	AC=2;AF=1.00;AN=2;DP=110;ExcessHet=3.0103;FS=0.000;MLEAC=2;MLEAF=1.00;MQ=60.00;QD=29.23;SOR=1.835	GT:AD:DP:GQ:PL	1/1:0,110:110:99:3229,324,0	4	7.18425	6.72376	0.949291	12.518	12.5339	3.98732
d225007	Ib	Roe1	FBgn0014877	1	2R:13555257	1	2R	13555257	T	C	TC	FALSE	61	2155.03	AC=2;AF=1.00;AN=2;DP=61;ExcessHet=3.0103;FS=0.000;MLEAC=2;MLEAF=1.00;MQ=60.00;QD=28.18;SOR=2.584	GT:AD:DP:GQ:PL	1/1:0,61:61:99:2169,184,0	4	3.29931	2.86987	0.707151	1.50769	1.83494	3.98732
d225007	Ib	fl(2)d	FBgn0000662	-1	2R:13819885	0.242424	2R	13819885	C	A	GT	FALSE	165	708.6	AC=1;AF=0.500;AN=2;BaseQRankSum=-7.848;DP=165;ExcessHet=3.0103;FS=0.000;MLEAC=1;MLEAF=0.500;MQ=60.00;MQRankSum=0.000;QD=4.29;ReadPosRankSum=-1.347;SOR=0.647	GT:AD:DP:GQ:PL	0/1:125,40:165:99:716,0,4042	4	2.60305	2.3359	0.329402	1.82327	1.73325	3.98732
d225007	Ib	fl(2)d	FBgn0000662	-1	2R:13820094	0.169492	2R	13820094	A	T	TA	FALSE	119	347.6	AC=1;AF=0.500;AN=2;BaseQRankSum=4.362;DP=119;ExcessHet=3.0103;FS=2.321;MLEAC=1;MLEAF=0.500;MQ=60.00;MQRankSum=0.000;QD=2.95;ReadPosRankSum=1.218;SOR=1.011	GT:AD:DP:GQ:PL	0/1:98,20:118:99:355,0,2832	4	2.60305	2.3359	0.329402	1.82327	1.73325	3.98732
d225007	Ib	fl(2)d	FBgn0000662	-1	2R:13820617	1	2R	13820617	C	T	GA	FALSE	19	545.03	AC=2;AF=1.00;AN=2;DP=19;ExcessHet=3.0103;FS=0.000;MLEAC=2;MLEAF=1.00;MQ=60.00;QD=28.69;SOR=0.793	GT:AD:DP:GQ:PL	1/1:0,19:19:56:559,56,0	4	2.60305	2.3359	0.329402	1.82327	1.73325	3.98732
d225007	Ib	fl(2)d	FBgn0000662	-1	2R:13824501	1	2R	13824501	G	T	CA	FALSE	50	1474.03	AC=2;AF=1.00;AN=2;DP=50;ExcessHet=3.0103;FS=0.000;MLEAC=2;MLEAF=1.00;MQ=60.00;QD=29.48;SOR=3.745	GT:AD:DP:GQ:PL	1/1:0,50:50:99:1488,148,0	4	2.60305	2.3359	0.329402	1.82327	1.73325	3.98732
d225007	Ib	CG6329	FBgn0033872	1	2R:13829759	1	2R	13829759	G	T	GT	FALSE	142	4914.03	AC=2;AF=1.00;AN=2;DP=142;ExcessHet=3.0103;FS=0.000;MLEAC=2;MLEAF=1.00;MQ=60.00;QD=34.61;SOR=1.329	GT:AD:DP:GQ:PL	1/1:0,142:142:99:4928,427,0	4	6.30782	5.19838	0.0246684	0.326178	0.229277	3.98732
d225007	Ib	CG6329	FBgn0033872	1	2R:13830968	0.536	2R	13830968	A	C	AC	FALSE	125	2138.6	AC=1;AF=0.500;AN=2;BaseQRankSum=6.941;DP=125;ExcessHet=3.0103;FS=3.391;MLEAC=1;MLEAF=0.500;MQ=60.00;MQRankSum=0.000;QD=17.11;ReadPosRankSum=1.417;SOR=0.429	GT:AD:DP:GQ:PL	0/1:58,67:125:99:2146,0,1608	4	6.30782	5.19838	0.0246684	0.326178	0.229277	3.98732
d225007	Ib	CG6329	FBgn0033872	1	2R:13831452	0.556701	2R	13831452	T	C	TC	FALSE	97	1562.6	AC=1;AF=0.500;AN=2;BaseQRankSum=4.432;DP=97;ExcessHet=3.0103;FS=0.761;MLEAC=1;MLEAF=0.500;MQ=60.00;MQRankSum=0.000;QD=16.11;ReadPosRankSum=0.501;SOR=0.727	GT:AD:DP:GQ:PL	0/1:43,54:97:99:1570,0,1155	4	6.30782	5.19838	0.0246684	0.326178	0.229277	3.98732
d225007	Ib	CG6329	FBgn0033872	1	2R:13831486	0.555556	2R	13831486	C	A	CA	FALSE	90	1485.6	AC=1;AF=0.500;AN=2;BaseQRankSum=-3.781;DP=90;ExcessHet=3.0103;FS=2.820;MLEAC=1;MLEAF=0.500;MQ=60.00;MQRankSum=0.000;QD=16.51;ReadPosRankSum=0.102;SOR=0.454	GT:AD:DP:GQ:PL	0/1:40,50:90:99:1493,0,1106	4	6.30782	5.19838	0.0246684	0.326178	0.229277	3.98732
d225007	Ib	CG6329	FBgn0033872	1	2R:13831556	0.684211	2R	13831556	C	G	CG	FALSE	76	2108.6	AC=1;AF=0.500;AN=2;BaseQRankSum=5.288;DP=76;ExcessHet=3.0103;FS=2.153;MLEAC=1;MLEAF=0.500;MQ=60.00;MQRankSum=0.000;QD=27.74;ReadPosRankSum=-0.466;SOR=0.452	GT:AD:DP:GQ:PL	0/1:24,52:76:99:2116,0,772	4	6.30782	5.19838	0.0246684	0.326178	0.229277	3.98732
d225007	Ib	CG6329	FBgn0033872	1	2R:13831585	0.586957	2R	13831585	T	C	TC	FALSE	92	1842.6	AC=1;AF=0.500;AN=2;BaseQRankSum=6.413;DP=92;ExcessHet=3.0103;FS=0.796;MLEAC=1;MLEAF=0.500;MQ=60.00;MQRankSum=0.000;QD=20.03;ReadPosRankSum=0.644;SOR=0.679	GT:AD:DP:GQ:PL	0/1:38,54:92:99:1850,0,964	4	6.30782	5.19838	0.0246684	0.326178	0.229277	3.98732
d225007	Ib	CG6329	FBgn0033872	1	2R:13831651	0.584906	2R	13831651	T	G	TG	FALSE	106	1881.6	AC=1;AF=0.500;AN=2;BaseQRankSum=4.866;DP=106;ExcessHet=3.0103;FS=0.000;MLEAC=1;MLEAF=0.500;MQ=60.00;MQRankSum=0.000;QD=17.75;ReadPosRankSum=0.891;SOR=0.732	GT:AD:DP:GQ:PL	0/1:44,62:106:99:1889,0,1220	4	6.30782	5.19838	0.0246684	0.326178	0.229277	3.98732
d225007	Ib	CG6329	FBgn0033872	1	2R:13832058	0.833333	2R	13832058	A	T	AT	FALSE	270	9284.6	AC=1;AF=0.500;AN=2;BaseQRankSum=-7.098;DP=270;ExcessHet=3.0103;FS=10.462;MLEAC=1;MLEAF=0.500;MQ=60.00;MQRankSum=0.000;QD=34.39;ReadPosRankSum=-1.832;SOR=0.266	GT:AD:DP:GQ:PL	0/1:45,225:270:99:9292,0,1206	4	6.30782	5.19838	0.0246684	0.326178	0.229277	3.98732
d225007	Ib	CG6329	FBgn0033872	1	2R:13832088	0.830769	2R	13832088	C	T	CT	FALSE	195	5040.6	AC=1;AF=0.500;AN=2;BaseQRankSum=-7.659;DP=195;ExcessHet=3.0103;FS=4.711;MLEAC=1;MLEAF=0.500;MQ=60.00;MQRankSum=0.000;QD=25.85;ReadPosRankSum=-0.357;SOR=0.369	GT:AD:DP:GQ:PL	0/1:33,162:195:99:5048,0,640	4	6.30782	5.19838	0.0246684	0.326178	0.229277	3.98732
d225007	Ib	CG6329	FBgn0033872	1	2R:13832486	0.447273	2R	13832486	G	A	GA	FALSE	275	3180.6	AC=1;AF=0.500;AN=2;BaseQRankSum=-8.862;DP=275;ExcessHet=3.0103;FS=10.598;MLEAC=1;MLEAF=0.500;MQ=60.00;MQRankSum=0.000;QD=11.57;ReadPosRankSum=2.440;SOR=1.211	GT:AD:DP:GQ:PL	0/1:152,123:275:99:3188,0,4648	4	6.30782	5.19838	0.0246684	0.326178	0.229277	3.98732
d225007	Ib	ReepB	FBgn0033906	1	2R:14172328	0.60815	2R	14172328	T	G	TG	FALSE	319	6116.6	AC=1;AF=0.500;AN=2;BaseQRankSum=11.022;DP=319;ExcessHet=3.0103;FS=4.461;MLEAC=1;MLEAF=0.500;MQ=60.00;MQRankSum=0.000;QD=19.17;ReadPosRankSum=-1.015;SOR=0.491	GT:AD:DP:GQ:PL	0/1:125,194:319:99:6124,0,3183	4	8.82339	8.47452	0.973655	7.40431	7.35215	3.98732
d225007	Ib	ReepB	FBgn0033906	1	2R:14172453	0.602222	2R	14172453	A	C	AC	FALSE	452	8702.6	AC=1;AF=0.500;AN=2;BaseQRankSum=12.343;DP=452;ExcessHet=3.0103;FS=3.294;MLEAC=1;MLEAF=0.500;MQ=60.00;MQRankSum=0.000;QD=19.34;ReadPosRankSum=-0.300;SOR=0.491	GT:AD:DP:GQ:PL	0/1:179,271:450:99:8710,0,4729	4	8.82339	8.47452	0.973655	7.40431	7.35215	3.98732
d225007	Ib	mRpS16	FBgn0033907	-1	2R:14173073	0.84	2R	14173073	A	G	TC	FALSE	50	1689.6	AC=1;AF=0.500;AN=2;BaseQRankSum=2.629;DP=50;ExcessHet=3.0103;FS=9.806;MLEAC=1;MLEAF=0.500;MQ=60.00;MQRankSum=0.000;QD=33.79;ReadPosRankSum=0.279;SOR=2.935	GT:AD:DP:GQ:PL	0/1:8,42:50:99:1697,0,200	4	2.9769	2.95758	0.828541	2.15934	1.92185	3.98732
d225007	Ib	mRpS16	FBgn0033907	-1	2R:14173148	1	2R	14173148	G	A	CT	FALSE	47	1379.01	AC=2;AF=1.00;AN=2;DP=47;ExcessHet=3.0103;FS=0.000;MLEAC=1;MLEAF=0.500;MQ=60.00;QD=32.07;SOR=1.954	GT:AD:DP:GQ:PL	1/1:0,43:43:99:1404,129,0	4	2.9769	2.95758	0.828541	2.15934	1.92185	3.98732
d225007	Ib	mRpS16	FBgn0033907	-1	2R:14173501	1	2R	14173501	A	G	TC	FALSE	47	1618.03	AC=2;AF=1.00;AN=2;DP=47;ExcessHet=3.0103;FS=0.000;MLEAC=2;MLEAF=1.00;MQ=60.00;QD=34.43;SOR=1.981	GT:AD:DP:GQ:PL	1/1:0,47:47:99:1632,140,0	4	2.9769	2.95758	0.828541	2.15934	1.92185	3.98732
d225007	Ib	Ih	FBgn0263397	1	2R:14276241	0.700565	2R	14276241	G	C	GC	FALSE	177	5008.6	AC=1;AF=0.500;AN=2;BaseQRankSum=-4.406;DP=177;ExcessHet=3.0103;FS=8.742;MLEAC=1;MLEAF=0.500;MQ=60.00;MQRankSum=0.000;QD=28.30;ReadPosRankSum=-1.376;SOR=0.298	GT:AD:DP:GQ:PL	0/1:53,124:177:99:5016,0,1852	4	4.3136	3.68182	0.0111521	1.23315	1.33225	3.98732
d225007	Ib	Ih	FBgn0263397	1	2R:14276242	0.698864	2R	14276242	A	T	AT	FALSE	176	5008.6	AC=1;AF=0.500;AN=2;BaseQRankSum=0.496;DP=176;ExcessHet=3.0103;FS=8.762;MLEAC=1;MLEAF=0.500;MQ=60.00;MQRankSum=0.000;QD=28.46;ReadPosRankSum=-1.239;SOR=0.290	GT:AD:DP:GQ:PL	0/1:53,123:176:99:5016,0,1852	4	4.3136	3.68182	0.0111521	1.23315	1.33225	3.98732
d225007	Ib	Ih	FBgn0263397	1	2R:14276342	0.554745	2R	14276342	C	T	CT	FALSE	139	1853.6	AC=1;AF=0.500;AN=2;BaseQRankSum=-7.723;DP=139;ExcessHet=3.0103;FS=157.068;MLEAC=1;MLEAF=0.500;MQ=60.00;MQRankSum=0.000;QD=13.53;ReadPosRankSum=1.575;SOR=2.872	GT:AD:DP:GQ:PL	0/1:61,76:137:99:1861,0,1914	4	4.3136	3.68182	0.0111521	1.23315	1.33225	3.98732
d225007	Ib	Diap2	FBgn0015247	-1	2R:15932335	0.934579	2R	15932335	C	T	GA	FALSE	107	2967.03	AC=2;AF=1.00;AN=2;BaseQRankSum=-3.175;DP=107;ExcessHet=3.0103;FS=6.150;MLEAC=2;MLEAF=1.00;MQ=60.00;MQRankSum=0.000;QD=27.73;ReadPosRankSum=-0.183;SOR=1.460	GT:AD:DP:GQ:PL	1/1:7,100:107:66:2981,66,0	4	2.21743	2.14379	0.569937	1.94321	1.78065	3.98732
d225007	Ib	Diap2	FBgn0015247	-1	2R:15932794	1	2R	15932794	A	G	TC	FALSE	45	2011.03	AC=2;AF=1.00;AN=2;DP=45;ExcessHet=3.0103;FS=0.000;MLEAC=2;MLEAF=1.00;MQ=60.00;QD=28.82;SOR=2.252	GT:AD:DP:GQ:PL	1/1:0,45:45:99:2025,135,0	4	2.21743	2.14379	0.569937	1.94321	1.78065	3.98732
d225007	Ib	CG8320	FBgn0034059	1	2R:15993193	1	2R	15993193	T	C	TC	FALSE	113	5199.03	AC=2;AF=1.00;AN=2;DP=113;ExcessHet=3.0103;FS=0.000;MLEAC=2;MLEAF=1.00;MQ=60.00;QD=27.46;SOR=0.903	GT:AD:DP:GQ:PL	1/1:0,113:113:99:5213,353,0	4	3.3196	3.11592	0.958839	1.9464	2.06793	3.98732
d225007	Ib	Ufc1	FBgn0034061	-1	2R:16007156	1	2R	16007156	C	G	GC	FALSE	69	2503.03	AC=2;AF=1.00;AN=2;DP=69;ExcessHet=3.0103;FS=0.000;MLEAC=2;MLEAF=1.00;MQ=60.00;QD=25.38;SOR=3.426	GT:AD:DP:GQ:PL	1/1:0,69:69:99:2517,208,0	4	3.89671	4.76406	0.198863	4.33244	4.42744	3.98732
d225007	Ib	Rho1	FBgn0014020	1	2R:16102790	0.606557	2R	16102790	G	A	GA	FALSE	122	2053.6	AC=1;AF=0.500;AN=2;BaseQRankSum=0.239;DP=122;ExcessHet=3.0103;FS=5.131;MLEAC=1;MLEAF=0.500;MQ=60.00;MQRankSum=0.000;QD=16.83;ReadPosRankSum=-3.211;SOR=0.268	GT:AD:DP:GQ:PL	0/1:48,74:122:99:2061,0,1133	4	6.72837	7.15367	0.666915	6.19756	5.79971	3.98732
d225007	Ib	Got1	FBgn0001124	1	2R:16141839	1	2R	16141839	A	T	AT	FALSE	136	4400.03	AC=2;AF=1.00;AN=2;DP=136;ExcessHet=3.0103;FS=0.000;MLEAC=2;MLEAF=1.00;MQ=60.00;QD=32.35;SOR=2.636	GT:AD:DP:GQ:PL	1/1:0,136:136:99:4414,407,0	4	4.46672	4.50823	0.923616	5.08115	5.69811	3.98732
d225007	Ib	Lis-1	FBgn0015754	1	2R:16183950	0.290323	2R	16183950	A	T	AT	FALSE	93	549.6	AC=1;AF=0.500;AN=2;BaseQRankSum=-6.519;DP=93;ExcessHet=3.0103;FS=4.576;MLEAC=1;MLEAF=0.500;MQ=60.00;MQRankSum=0.000;QD=5.91;ReadPosRankSum=-5.897;SOR=1.317	GT:AD:DP:GQ:PL	0/1:66,27:93:99:557,0,2040	4	5.71834	6.47378	0.450267	2.80773	2.38484	3.98732
d225007	Ib	Lis-1	FBgn0015754	1	2R:16184021	0.641221	2R	16184021	G	A	GA	FALSE	131	2392.6	AC=1;AF=0.500;AN=2;BaseQRankSum=-5.102;DP=131;ExcessHet=3.0103;FS=23.277;MLEAC=1;MLEAF=0.500;MQ=60.00;MQRankSum=0.000;QD=18.26;ReadPosRankSum=0.815;SOR=2.349	GT:AD:DP:GQ:PL	0/1:47,84:131:99:2400,0,1280	4	5.71834	6.47378	0.450267	2.80773	2.38484	3.98732
d225007	Ib	Lis-1	FBgn0015754	1	2R:16184668	0.808219	2R	16184668	A	T	AT	FALSE	219	5220.6	AC=1;AF=0.500;AN=2;BaseQRankSum=0.733;DP=219;ExcessHet=3.0103;FS=60.968;MLEAC=1;MLEAF=0.500;MQ=60.00;MQRankSum=0.000;QD=23.84;ReadPosRankSum=3.087;SOR=1.763	GT:AD:DP:GQ:PL	0/1:42,177:219:99:5228,0,1148	4	5.71834	6.47378	0.450267	2.80773	2.38484	3.98732
d225007	Ib	mbl	FBgn0265487	1	2R:17265743	0.316547	2R	17265743	G	A	GA	FALSE	557	4252.6	AC=1;AF=0.500;AN=2;BaseQRankSum=-1.176;DP=557;ExcessHet=3.0103;FS=3.583;MLEAC=1;MLEAF=0.500;MQ=60.00;MQRankSum=0.000;QD=7.65;ReadPosRankSum=-1.606;SOR=0.960	GT:AD:DP:GQ:PL	0/1:380,176:556:99:4260,0,10949	4	7.78883	7.80422	0.853422	4.6302	4.32818	3.98732
d225007	Ib	pAbp	FBgn0265297	1	2R:18145394	0.1198	2R	18145394	C	T	CT	FALSE	601	668.6	AC=1;AF=0.500;AN=2;BaseQRankSum=-6.809;DP=601;ExcessHet=3.0103;FS=0.000;MLEAC=1;MLEAF=0.500;MQ=60.00;MQRankSum=0.000;QD=1.11;ReadPosRankSum=-0.984;SOR=0.592	GT:AD:DP:GQ:PL	0/1:529,72:601:99:676,0,17819	4	8.63626	8.36071	0.0632563	6.39335	6.25444	3.98732
d225007	Ib	CG30116	FBgn0028496	-1	2R:18457217	1	2R	18457217	G	A	CT	FALSE	105	3316.03	AC=2;AF=1.00;AN=2;DP=105;ExcessHet=3.0103;FS=0.000;MLEAC=2;MLEAF=1.00;MQ=60.00;QD=31.88;SOR=1.201	GT:AD:DP:GQ:PL	1/1:0,104:104:99:3330,312,0	4	2.05783	0.888285	0.000330328	0.132941	0.0831169	3.98732
d225007	Ib	Gint3	FBgn0034372	-1	2R:18658481	1	2R	18658481	C	T	GA	FALSE	18	542.03	AC=2;AF=1.00;AN=2;DP=18;ExcessHet=3.0103;FS=0.000;MLEAC=2;MLEAF=1.00;MQ=60.00;QD=30.11;SOR=2.303	GT:AD:DP:GQ:PL	1/1:0,18:18:54:556,54,0	4	2.91087	4.05022	0.0524434	1.78248	1.50677	3.98732
d225007	Ib	Gint3	FBgn0034372	-1	2R:18659841	1	2R	18659841	A	G	TC	FALSE	56	1952.03	AC=2;AF=1.00;AN=2;DP=56;ExcessHet=3.0103;FS=0.000;MLEAC=2;MLEAF=1.00;MQ=60.00;QD=34.86;SOR=0.765	GT:AD:DP:GQ:PL	1/1:0,56:56:99:1966,168,0	4	2.91087	4.05022	0.0524434	1.78248	1.50677	3.98732
d225007	Ib	Fkbp12	FBgn0013954	1	2R:19290961	0.387097	2R	19290961	T	A	TA	FALSE	43	385.6	AC=1;AF=0.500;AN=2;BaseQRankSum=0.516;DP=43;ExcessHet=3.0103;FS=0.000;MLEAC=1;MLEAF=0.500;MQ=60.00;MQRankSum=0.000;QD=12.44;ReadPosRankSum=-2.125;SOR=0.352	GT:AD:DP:GQ:PL	0/1:19,12:31:99:393,0,817	4	10.9805	10.3498	0.300057	7.54456	7.90627	3.98732
d225007	Ib	CG9344	FBgn0034564	1	2R:20977348	1	2R	20977348	C	T	CT	FALSE	135	4561.03	AC=2;AF=1.00;AN=2;DP=135;ExcessHet=3.0103;FS=0.000;MLEAC=2;MLEAF=1.00;MQ=60.00;QD=33.79;SOR=0.801	GT:AD:DP:GQ:PL	1/1:0,135:135:99:4575,403,0	4	5.06235	4.57082	0.595889	1.73156	2.29314	3.98732
d225007	Ib	CG9344	FBgn0034564	1	2R:20977417	1	2R	20977417	C	T	CT	FALSE	119	3964.03	AC=2;AF=1.00;AN=2;DP=119;ExcessHet=3.0103;FS=0.000;MLEAC=2;MLEAF=1.00;MQ=60.00;QD=33.31;SOR=2.322	GT:AD:DP:GQ:PL	1/1:0,119:119:99:3978,357,0	4	5.06235	4.57082	0.595889	1.73156	2.29314	3.98732
d225007	Ib	Xbp1	FBgn0021872	1	2R:21144020	1	2R	21144020	G	A	GA	FALSE	18	572.03	AC=2;AF=1.00;AN=2;DP=18;ExcessHet=3.0103;FS=0.000;MLEAC=2;MLEAF=1.00;MQ=60.00;QD=31.78;SOR=2.303	GT:AD:DP:GQ:PL	1/1:0,18:18:54:586,54,0	4	6.37675	5.94381	0.755289	5.67561	5.11164	3.98732
d225007	Ib	CG44245	FBgn0265180	1	2R:21212711	1	2R	21212711	A	T	AT	FALSE	57	1832.03	AC=2;AF=1.00;AN=2;DP=57;ExcessHet=3.0103;FS=0.000;MLEAC=2;MLEAF=1.00;MQ=60.00;QD=32.14;SOR=3.461	GT:AD:DP:GQ:PL	1/1:0,57:57:99:1846,169,0	4	4.99076	3.81368	0.0254466	6.55123	7.5599	3.98732
d225007	Ib	CG44245	FBgn0265180	1	2R:21212724	0.984615	2R	21212724	A	C	AC	FALSE	65	2021.03	AC=2;AF=1.00;AN=2;BaseQRankSum=1.111;DP=65;ExcessHet=3.0103;FS=0.000;MLEAC=2;MLEAF=1.00;MQ=60.00;MQRankSum=0.000;QD=31.09;ReadPosRankSum=-0.801;SOR=1.358	GT:AD:DP:GQ:PL	1/1:1,64:65:99:2035,180,0	4	4.99076	3.81368	0.0254466	6.55123	7.5599	3.98732
d225007	Ib	ND-B12	FBgn0034645	1	2R:21658249	0.605	2R	21658249	C	A	CA	FALSE	278	1156.04	AC=1;AF=0.500;AN=2;BaseQRankSum=-7.804;DP=278;ExcessHet=3.0103;FS=12.589;MLEAC=1;MLEAF=0.500;MQ=60.00;MQRankSum=0.000;QD=5.78;ReadPosRankSum=-1.815;SOR=1.457	GT:AD:DP:GQ:PL	0/1:79,121:200:99:3220,0,2265	4	8.33677	7.96737	0.655756	7.85461	8.04147	3.98732
d225007	Ib	RpS24	FBgn0261596	-1	2R:22641033	0.167593	2R	22641033	C	T	GA	FALSE	1260	3128.6	AC=1;AF=0.500;AN=2;BaseQRankSum=-5.320;DP=1260;ExcessHet=3.0103;FS=2.587;MLEAC=1;MLEAF=0.500;MQ=60.00;MQRankSum=0.000;QD=2.48;ReadPosRankSum=2.417;SOR=0.991	GT:AD:DP:GQ:PL	0/1:1048,211:1259:99:3136,0,32710	4	11.6783	11.4462	0.0937966	11.0017	10.8821	3.98732
d225007	Ib	Golgin245	FBgn0034854	-1	2R:23371927	1	2R	23371927	G	C	CG	FALSE	122	4444.05	AC=2;AF=1.00;AN=2;DP=122;ExcessHet=3.0103;FS=0.000;MLEAC=2;MLEAF=1.00;MQ=60.00;QD=29.88;SOR=1.371	GT:AD:DP:GQ:PL	1/1:0,122:122:99:5511,382,0	4	1.20126	1.46254	0.428902	1.39523	1.1053	3.98732
d225007	Ib	CG4612	FBgn0035016	-1	2R:24524064	0.705882	2R	24524064	C	T	GA	FALSE	85	1507.6	AC=1;AF=0.500;AN=2;BaseQRankSum=-3.731;DP=85;ExcessHet=3.0103;FS=0.904;MLEAC=1;MLEAF=0.500;MQ=60.00;MQRankSum=0.000;QD=17.74;ReadPosRankSum=1.184;SOR=0.769	GT:AD:DP:GQ:PL	0/1:25,60:85:99:1515,0,594	4	5.78401	5.60528	0.826696	1.76623	1.27661	3.98732
d225007	Ib	RNASEK	FBgn0262116	-1	2R:4187491	0.238095	2R	4187491	A	C	TG	FALSE	42	166.6	AC=1;AF=0.500;AN=2;BaseQRankSum=3.131;DP=42;ExcessHet=3.0103;FS=0.000;MLEAC=1;MLEAF=0.500;MQ=60.00;MQRankSum=0.000;QD=3.97;ReadPosRankSum=-1.435;SOR=0.387	GT:AD:DP:GQ:PL	0/1:32,10:42:99:174,0,1115	4	9.71502	9.16476	0.450255	7.55678	7.90755	3.98732
d225007	Ib	CG14591	FBgn0033054	-1	2R:6036627	0.957895	2R	6036627	C	T	GA	FALSE	95	2929.03	AC=2;AF=1.00;AN=2;BaseQRankSum=-1.794;DP=95;ExcessHet=3.0103;FS=0.000;MLEAC=2;MLEAF=1.00;MQ=60.00;MQRankSum=0.000;QD=30.83;ReadPosRankSum=-0.364;SOR=3.611	GT:AD:DP:GQ:PL	1/1:4,91:95:99:2943,161,0	4	4.47495	4.49171	0.904654	0.132465	0.0680559	3.98732
d225007	Ib	EcR	FBgn0000546	-1	2R:6092515	1	2R	6092515	T	A	AT	FALSE	28	1381.03	AC=2;AF=1.00;AN=2;DP=28;ExcessHet=3.0103;FS=0.000;MLEAC=2;MLEAF=1.00;MQ=60.00;QD=25.39;SOR=6.736	GT:AD:DP:GQ:PL	1/1:0,28:28:93:1395,93,0	4	4.61238	4.32981	0.548578	2.46896	2.59811	3.98732
d225007	Ib	kermit	FBgn0010504	-1	2R:8156297	0.43617	2R	8156297	C	T	GA	FALSE	94	1145.6	AC=1;AF=0.500;AN=2;BaseQRankSum=-2.036;DP=94;ExcessHet=3.0103;FS=10.103;MLEAC=1;MLEAF=0.500;MQ=60.00;MQRankSum=0.000;QD=12.19;ReadPosRankSum=0.157;SOR=1.607	GT:AD:DP:GQ:PL	0/1:53,41:94:99:1153,0,1560	4	0.870174	0.7957	0.872313	0.705398	0.872813	3.98732
d225007	Ib	kermit	FBgn0010504	-1	2R:8156467	0.340909	2R	8156467	G	A	CT	FALSE	88	704.6	AC=1;AF=0.500;AN=2;BaseQRankSum=-4.659;DP=88;ExcessHet=3.0103;FS=0.000;MLEAC=1;MLEAF=0.500;MQ=60.00;MQRankSum=0.000;QD=8.01;ReadPosRankSum=-0.790;SOR=0.602	GT:AD:DP:GQ:PL	0/1:58,30:88:99:712,0,1804	4	0.870174	0.7957	0.872313	0.705398	0.872813	3.98732
d225007	Ib	Lcp4	FBgn0002535	1	2R:8437650	1	2R	8437650	C	G	CG	FALSE	46	1711.03	AC=2;AF=1.00;AN=2;DP=46;ExcessHet=3.0103;FS=0.000;MLEAC=2;MLEAF=1.00;MQ=60.00;QD=30.57;SOR=3.258	GT:AD:DP:GQ:PL	1/1:0,46:46:99:1725,138,0	4	7.22388	6.26609	0.690822	12.4228	14.115	3.98732
d225007	Ib	brp	FBgn0259246	1	2R:9516731	0.958904	2R	9516731	G	A	GA	FALSE	86	1866.03	AC=2;AF=1.00;AN=2;BaseQRankSum=2.430;DP=86;ExcessHet=3.0103;FS=0.000;MLEAC=2;MLEAF=1.00;MQ=60.00;MQRankSum=0.000;QD=25.56;ReadPosRankSum=1.610;SOR=1.193	GT:AD:DP:GQ:PL	1/1:3,70:73:99:1880,111,0	4	4.91533	5.34215	0.729047	0.115732	0.0447217	3.98732
d225007	Ib	Apt1	FBgn0042138	1	3L:11629925	0.483333	3L	11629925	G	T	GT	FALSE	60	818.6	AC=1;AF=0.500;AN=2;BaseQRankSum=-1.035;DP=60;ExcessHet=3.0103;FS=1.727;MLEAC=1;MLEAF=0.500;MQ=60.00;MQRankSum=0.000;QD=13.64;ReadPosRankSum=-1.033;SOR=1.329	GT:AD:DP:GQ:PL	0/1:31,29:60:99:826,0,800	4	7.03967	7.08104	0.899746	3.39757	3.11187	3.98732
d225007	Ib	RpS4	FBgn0011284	1	3L:13043908	0.761905	3L	13043908	C	A	CA	FALSE	21	499.6	AC=1;AF=0.500;AN=2;BaseQRankSum=-1.984;DP=21;ExcessHet=3.0103;FS=0.000;MLEAC=1;MLEAF=0.500;MQ=60.00;MQRankSum=0.000;QD=23.79;ReadPosRankSum=2.963;SOR=1.022	GT:AD:DP:GQ:PL	0/1:5,16:21:99:507,0,165	4	11.7053	11.6919	0.574608	10.8292	10.6055	3.98732
d225007	Ib	RpS4	FBgn0011284	1	3L:13043910	0.928571	3L	13043910	C	A	CA	FALSE	14	504.6	AC=1;AF=0.500;AN=2;BaseQRankSum=-1.252;DP=14;ExcessHet=3.0103;FS=0.000;MLEAC=1;MLEAF=0.500;MQ=60.00;MQRankSum=0.000;QD=28.02;ReadPosRankSum=2.089;SOR=2.448	GT:AD:DP:GQ:PL	0/1:1,13:14:99:512,0,130	4	11.7053	11.6919	0.574608	10.8292	10.6055	3.98732
d225007	Ib	Rab8	FBgn0262518	-1	3L:19867853	1	3L	19867853	C	A	GT	FALSE	16	706.03	AC=2;AF=1.00;AN=2;DP=16;ExcessHet=3.0103;FS=0.000;MLEAC=2;MLEAF=1.00;MQ=60.00;QD=32.86;SOR=5.670	GT:AD:DP:GQ:PL	1/1:0,16:16:48:720,48,0	4	3.56357	3.87682	0.556302	2.85355	2.5417	3.98732
d225007	Ib	miple1	FBgn0027111	1	3L:268336	0.208602	3L	268336	G	A	GA	FALSE	466	1656.6	AC=1;AF=0.500;AN=2;BaseQRankSum=-7.137;DP=466;ExcessHet=3.0103;FS=30.691;MLEAC=1;MLEAF=0.500;MQ=60.00;MQRankSum=0.000;QD=3.56;ReadPosRankSum=-5.851;SOR=2.736	GT:AD:DP:GQ:PL	0/1:368,97:465:99:1664,0,11473	4	7.4131	6.72737	0.192646	0.350849	0.501846	3.98732
d225007	Ib	CG40228	FBgn0063670	-1	3L:27083848	0.359223	3L	27083848	G	A	CT	FALSE	309	2250.6	AC=1;AF=0.500;AN=2;BaseQRankSum=-7.901;DP=309;ExcessHet=3.0103;FS=7.901;MLEAC=1;MLEAF=0.500;MQ=60.00;MQRankSum=0.000;QD=7.28;ReadPosRankSum=4.659;SOR=0.348	GT:AD:DP:GQ:PL	0/1:198,111:309:99:2258,0,5889	4	7.30566	6.57352	0.516115	4.23839	4.11104	3.98732
d225007	Ib	eIF1	FBgn0035423	1	3L:3224500	0.150396	3L	3224500	C	T	CT	FALSE	379	834.6	AC=1;AF=0.500;AN=2;BaseQRankSum=-6.504;DP=379;ExcessHet=3.0103;FS=4.363;MLEAC=1;MLEAF=0.500;MQ=60.00;MQRankSum=0.000;QD=2.20;ReadPosRankSum=1.692;SOR=0.995	GT:AD:DP:GQ:PL	0/1:322,57:379:99:842,0,10399	4	9.0067	8.95376	0.566046	7.58748	7.48339	3.98732
d225007	Ib	CG32264	FBgn0052264	-1	3L:3717404	1	3L	3717404	G	T	CA	FALSE	26	1180.03	AC=2;AF=1.00;AN=2;DP=26;ExcessHet=3.0103;FS=0.000;MLEAC=2;MLEAF=1.00;MQ=60.00;QD=26.71;SOR=3.611	GT:AD:DP:GQ:PL	1/1:0,26:26:81:1194,81,0	4	3.4169	3.8072	0.084539	3.09462	2.70509	3.98732
d225007	Ib	CG32264	FBgn0052264	-1	3L:3717406	1	3L	3717406	A	C	TG	FALSE	26	1156.03	AC=2;AF=1.00;AN=2;DP=26;ExcessHet=3.0103;FS=0.000;MLEAC=2;MLEAF=1.00;MQ=60.00;QD=30.99;SOR=3.611	GT:AD:DP:GQ:PL	1/1:0,26:26:78:1170,78,0	4	3.4169	3.8072	0.084539	3.09462	2.70509	3.98732
d225007	Ib	nAChRbeta1	FBgn0000038	1	3L:4429644	0.285156	3L	4429644	G	A	GA	FALSE	256	1742.6	AC=1;AF=0.500;AN=2;BaseQRankSum=-2.449;DP=256;ExcessHet=3.0103;FS=0.000;MLEAC=1;MLEAF=0.500;MQ=60.00;MQRankSum=0.000;QD=6.81;ReadPosRankSum=1.183;SOR=0.717	GT:AD:DP:GQ:PL	0/1:183,73:256:99:1750,0,5645	4	6.35534	5.5438	0.188032	0.118617	0.0901246	3.98732
d225007	Ib	nAChRbeta1	FBgn0000038	1	3L:4435434	0.312668	3L	4435434	G	A	GA	FALSE	371	2718.6	AC=1;AF=0.500;AN=2;BaseQRankSum=-1.816;DP=371;ExcessHet=3.0103;FS=13.370;MLEAC=1;MLEAF=0.500;MQ=60.00;MQRankSum=0.000;QD=7.33;ReadPosRankSum=-0.211;SOR=1.413	GT:AD:DP:GQ:PL	0/1:255,116:371:99:2726,0,7706	4	6.35534	5.5438	0.188032	0.118617	0.0901246	3.98732
d225007	Ib	Hsp23	FBgn0001224	1	3L:9381885	1	3L	9381885	C	G	CG	FALSE	15	500.03	AC=2;AF=1.00;AN=2;DP=15;ExcessHet=3.0103;FS=0.000;MLEAC=2;MLEAF=1.00;MQ=60.00;QD=25.50;SOR=0.976	GT:AD:DP:GQ:PL	1/1:0,14:14:43:514,43,0	4	11.3927	13.4989	1.5571e-13	6.47518	5.86934	3.98732
d225007	Ib	RpL3	FBgn0020910	1	3R:11224946	0.262295	3R	11224946	C	G	CG	FALSE	65	409.6	AC=1;AF=0.500;AN=2;BaseQRankSum=-3.472;DP=65;ExcessHet=3.0103;FS=29.328;MLEAC=1;MLEAF=0.500;MQ=60.00;MQRankSum=0.000;QD=6.71;ReadPosRankSum=-4.350;SOR=5.073	GT:AD:DP:GQ:PL	0/1:45,16:61:99:417,0,1923	4	10.7673	10.5153	0.0302111	9.54502	9.33152	3.98732
d225007	Ib	RpL3	FBgn0020910	1	3R:11224947	0.275862	3R	11224947	T	A	TA	FALSE	62	409.6	AC=1;AF=0.500;AN=2;BaseQRankSum=-4.040;DP=62;ExcessHet=3.0103;FS=32.785;MLEAC=1;MLEAF=0.500;MQ=60.00;MQRankSum=0.000;QD=7.06;ReadPosRankSum=-5.592;SOR=5.307	GT:AD:DP:GQ:PL	0/1:42,16:58:99:417,0,1923	4	10.7673	10.5153	0.0302111	9.54502	9.33152	3.98732
d225007	Ib	RpL3	FBgn0020910	1	3R:11224948	0.275862	3R	11224948	C	A	CA	FALSE	58	415.6	AC=1;AF=0.500;AN=2;BaseQRankSum=5.570;DP=58;ExcessHet=3.0103;FS=32.785;MLEAC=1;MLEAF=0.500;MQ=60.00;MQRankSum=0.000;QD=7.17;ReadPosRankSum=-5.878;SOR=5.307	GT:AD:DP:GQ:PL	0/1:42,16:58:99:423,0,1839	4	10.7673	10.5153	0.0302111	9.54502	9.33152	3.98732
d225007	Ib	EndoA	FBgn0038659	1	3R:18910260	0.307692	3R	18910260	T	C	TC	FALSE	104	1105.6	AC=1;AF=0.500;AN=2;BaseQRankSum=5.776;DP=104;ExcessHet=3.0103;FS=5.704;MLEAC=1;MLEAF=0.500;MQ=60.00;MQRankSum=0.000;QD=10.63;ReadPosRankSum=0.486;SOR=1.776	GT:AD:DP:GQ:PL	0/1:72,32:104:99:1113,0,2502	4	4.7728	5.29408	0.154643	0.85352	0.843628	3.98732
d225007	Ib	CG6040	FBgn0038679	1	3R:19096973	0.384	3R	19096973	G	T	GT	FALSE	125	985.6	AC=1;AF=0.500;AN=2;BaseQRankSum=-2.196;DP=125;ExcessHet=3.0103;FS=4.281;MLEAC=1;MLEAF=0.500;MQ=60.00;MQRankSum=0.000;QD=7.88;ReadPosRankSum=-3.054;SOR=1.219	GT:AD:DP:GQ:PL	0/1:77,48:125:99:993,0,1925	4	0.425801	0.142933	0.0185786	0.4582	0.75659	3.98732
d225007	Ib	CG5555	FBgn0038686	-1	3R:19179722	0.977273	3R	19179722	G	C	CG	FALSE	88	2970.03	AC=2;AF=1.00;AN=2;BaseQRankSum=2.270;DP=88;ExcessHet=3.0103;FS=2.949;MLEAC=2;MLEAF=1.00;MQ=60.00;MQRankSum=0.000;QD=33.75;SOR=0.176	GT:AD:DP:GQ:PL	1/1:2,86:88:99:2984,243,0	4	2.0786	3.00952	0.0586972	1.96886	1.59726	3.98732
d225007	Ib	CG5555	FBgn0038686	-1	3R:19179797	1	3R	19179797	G	T	CA	FALSE	62	2019.03	AC=2;AF=1.00;AN=2;DP=62;ExcessHet=3.0103;FS=0.000;MLEAC=2;MLEAF=1.00;MQ=60.00;QD=32.56;SOR=1.143	GT:AD:DP:GQ:PL	1/1:0,62:62:99:2033,185,0	4	2.0786	3.00952	0.0586972	1.96886	1.59726	3.98732
d225007	Ib	Atpalpha	FBgn0002921	1	3R:20974888	0.128329	3R	20974888	G	A	GA	FALSE	414	512.6	AC=1;AF=0.500;AN=2;BaseQRankSum=-3.492;DP=414;ExcessHet=3.0103;FS=3.377;MLEAC=1;MLEAF=0.500;MQ=60.00;MQRankSum=0.000;QD=1.24;ReadPosRankSum=-0.772;SOR=0.962	GT:AD:DP:GQ:PL	0/1:360,53:413:99:520,0,11010	4	9.18942	9.08294	0.418439	4.40032	4.50151	3.98732
d225007	Ib	Cow	FBgn0039054	-1	3R:23075169	0.8125	3R	23075169	C	T	GA	FALSE	64	2119.6	AC=1;AF=0.500;AN=2;BaseQRankSum=-4.063;DP=64;ExcessHet=3.0103;FS=0.000;MLEAC=1;MLEAF=0.500;MQ=60.00;MQRankSum=0.000;QD=33.12;ReadPosRankSum=-0.992;SOR=0.853	GT:AD:DP:GQ:PL	0/1:12,52:64:99:2127,0,347	4	6.07048	6.14794	0.757327	0.0371922	0.0664222	3.98732
d225007	Ib	Cow	FBgn0039054	-1	3R:23075200	0.825	3R	23075200	T	A	AT	FALSE	40	958.6	AC=1;AF=0.500;AN=2;BaseQRankSum=-0.458;DP=40;ExcessHet=3.0103;FS=10.387;MLEAC=1;MLEAF=0.500;MQ=60.00;MQRankSum=0.000;QD=23.97;ReadPosRankSum=0.143;SOR=0.620	GT:AD:DP:GQ:PL	0/1:7,33:40:99:966,0,101	4	6.07048	6.14794	0.757327	0.0371922	0.0664222	3.98732
d225007	Ib	Cow	FBgn0039054	-1	3R:23075298	0.807018	3R	23075298	C	T	GA	FALSE	58	1202.6	AC=1;AF=0.500;AN=2;BaseQRankSum=-4.035;DP=58;ExcessHet=3.0103;FS=4.798;MLEAC=1;MLEAF=0.500;MQ=60.00;MQRankSum=0.000;QD=21.10;ReadPosRankSum=0.071;SOR=0.581	GT:AD:DP:GQ:PL	0/1:11,46:57:99:1210,0,225	4	6.07048	6.14794	0.757327	0.0371922	0.0664222	3.98732
d225007	Ib	Cow	FBgn0039054	-1	3R:23112474	0.985915	3R	23112474	G	A	CT	FALSE	71	2269.03	AC=2;AF=1.00;AN=2;BaseQRankSum=-1.396;DP=71;ExcessHet=3.0103;FS=0.000;MLEAC=2;MLEAF=1.00;MQ=60.00;MQRankSum=0.000;QD=31.96;ReadPosRankSum=0.000;SOR=0.246	GT:AD:DP:GQ:PL	1/1:1,70:71:99:2283,174,0	4	6.07048	6.14794	0.757327	0.0371922	0.0664222	3.98732
d225007	Ib	cnc	FBgn0262975	-1	3R:23186349	1	3R	23186349	C	T	GA	FALSE	91	3079.03	AC=2;AF=1.00;AN=2;DP=91;ExcessHet=3.0103;FS=0.000;MLEAC=2;MLEAF=1.00;MQ=60.00;QD=33.84;SOR=2.783	GT:AD:DP:GQ:PL	1/1:0,91:91:99:3093,266,0	4	3.82387	4.59475	0.0116133	4.09835	3.88656	3.98732
d225007	Ib	cnc	FBgn0262975	-1	3R:23186482	0.794872	3R	23186482	T	G	AC	FALSE	195	5191.6	AC=1;AF=0.500;AN=2;BaseQRankSum=8.667;DP=195;ExcessHet=3.0103;FS=41.354;MLEAC=1;MLEAF=0.500;MQ=60.00;MQRankSum=0.000;QD=26.62;ReadPosRankSum=1.850;SOR=0.031	GT:AD:DP:GQ:PL	0/1:40,155:195:99:5199,0,734	4	3.82387	4.59475	0.0116133	4.09835	3.88656	3.98732
d225007	Ib	CG4467	FBgn0039064	-1	3R:23230281	1	3R	23230281	G	A	CT	FALSE	99	3352.03	AC=2;AF=1.00;AN=2;DP=99;ExcessHet=3.0103;FS=0.000;MLEAC=2;MLEAF=1.00;MQ=60.00;QD=33.86;SOR=2.424	GT:AD:DP:GQ:PL	1/1:0,99:99:99:3366,296,0	4	1.40633	2.11059	0.464463	0.12812	0.0331775	3.98732
d225007	Ib	CG4467	FBgn0039064	-1	3R:23230321	1	3R	23230321	A	T	TA	FALSE	113	3822.03	AC=2;AF=1.00;AN=2;DP=113;ExcessHet=3.0103;FS=0.000;MLEAC=2;MLEAF=1.00;MQ=60.00;QD=33.82;SOR=2.453	GT:AD:DP:GQ:PL	1/1:0,113:113:99:3836,340,0	4	1.40633	2.11059	0.464463	0.12812	0.0331775	3.98732
d225007	Ib	CG4467	FBgn0039064	-1	3R:23230333	1	3R	23230333	T	G	AC	FALSE	93	3218.03	AC=2;AF=1.00;AN=2;DP=93;ExcessHet=3.0103;FS=0.000;MLEAC=2;MLEAF=1.00;MQ=60.00;QD=34.60;SOR=1.994	GT:AD:DP:GQ:PL	1/1:0,93:93:99:3232,279,0	4	1.40633	2.11059	0.464463	0.12812	0.0331775	3.98732
d225007	Ib	ATPsynCF6	FBgn0016119	-1	3R:23355404	0.415205	3R	23355404	C	T	GA	FALSE	342	4019.6	AC=1;AF=0.500;AN=2;BaseQRankSum=-4.121;DP=342;ExcessHet=3.0103;FS=3.890;MLEAC=1;MLEAF=0.500;MQ=60.00;MQRankSum=0.000;QD=11.75;ReadPosRankSum=0.477;SOR=0.480	GT:AD:DP:GQ:PL	0/1:200,142:342:99:4027,0,7285	4	9.01907	8.99728	0.563116	8.34196	8.52202	3.98732
d225007	Ib	ATPsynCF6	FBgn0016119	-1	3R:23355666	0.466125	3R	23355666	C	T	GA	FALSE	369	4716.6	AC=1;AF=0.500;AN=2;BaseQRankSum=-8.184;DP=369;ExcessHet=3.0103;FS=2.749;MLEAC=1;MLEAF=0.500;MQ=60.00;MQRankSum=0.000;QD=12.78;ReadPosRankSum=0.163;SOR=0.553	GT:AD:DP:GQ:PL	0/1:197,172:369:99:4724,0,5697	4	9.01907	8.99728	0.563116	8.34196	8.52202	3.98732
d225007	Ib	Sec13	FBgn0024509	1	3R:23357632	1	3R	23357632	T	G	TG	FALSE	55	2019.03	AC=2;AF=1.00;AN=2;DP=55;ExcessHet=3.0103;FS=0.000;MLEAC=2;MLEAF=1.00;MQ=60.00;QD=32.94;SOR=1.877	GT:AD:DP:GQ:PL	1/1:0,55:55:99:2033,165,0	4	3.99691	3.71929	0.929505	3.0338	3.04866	3.98732
d225007	Ib	Sec13	FBgn0024509	1	3R:23357786	1	3R	23357786	T	C	TC	FALSE	64	2277.03	AC=2;AF=1.00;AN=2;DP=64;ExcessHet=3.0103;FS=0.000;MLEAC=2;MLEAF=1.00;MQ=60.00;QD=27.17;SOR=0.756	GT:AD:DP:GQ:PL	1/1:0,64:64:99:2291,192,0	4	3.99691	3.71929	0.929505	3.0338	3.04866	3.98732
d225007	Ib	Sec13	FBgn0024509	1	3R:23358058	1	3R	23358058	G	A	GA	FALSE	30	953.03	AC=2;AF=1.00;AN=2;DP=30;ExcessHet=3.0103;FS=0.000;MLEAC=2;MLEAF=1.00;MQ=60.00;QD=31.77;SOR=1.143	GT:AD:DP:GQ:PL	1/1:0,30:30:90:967,90,0	4	3.99691	3.71929	0.929505	3.0338	3.04866	3.98732
d225007	Ib	Sec13	FBgn0024509	1	3R:23358145	1	3R	23358145	T	C	TC	FALSE	42	1551.03	AC=2;AF=1.00;AN=2;DP=42;ExcessHet=3.0103;FS=0.000;MLEAC=2;MLEAF=1.00;MQ=60.00;QD=32.21;SOR=4.615	GT:AD:DP:GQ:PL	1/1:0,42:42:99:1565,126,0	4	3.99691	3.71929	0.929505	3.0338	3.04866	3.98732
d225007	Ib	Sec13	FBgn0024509	1	3R:23358229	1	3R	23358229	C	T	CT	FALSE	13	404.02	AC=2;AF=1.00;AN=2;DP=13;ExcessHet=3.0103;FS=0.000;MLEAC=2;MLEAF=1.00;MQ=60.00;QD=31.08;SOR=3.767	GT:AD:DP:GQ:PL	1/1:0,13:13:39:418,39,0	4	3.99691	3.71929	0.929505	3.0338	3.04866	3.98732
d225007	Ib	RpS3	FBgn0002622	1	3R:23359255	0.361702	3R	23359255	T	C	TC	FALSE	1318	12737.6	AC=1;AF=0.500;AN=2;BaseQRankSum=4.520;DP=1318;ExcessHet=3.0103;FS=0.000;MLEAC=1;MLEAF=0.500;MQ=60.00;MQRankSum=0.000;QD=9.68;ReadPosRankSum=1.439;SOR=0.721	GT:AD:DP:GQ:PL	0/1:840,476:1316:99:12745,0,25512	4	11.3972	11.4997	0.982615	10.5923	10.366	3.98732
d225007	Ib	RpS3	FBgn0002622	1	3R:23360107	0.402778	3R	23360107	C	A	CA	FALSE	72	674.6	AC=1;AF=0.500;AN=2;BaseQRankSum=-4.803;DP=72;ExcessHet=3.0103;FS=2.163;MLEAC=1;MLEAF=0.500;MQ=60.00;MQRankSum=0.000;QD=9.37;ReadPosRankSum=-0.776;SOR=0.435	GT:AD:DP:GQ:PL	0/1:43,29:72:99:682,0,1695	4	11.3972	11.4997	0.982615	10.5923	10.366	3.98732
d225007	Ib	Rpn9	FBgn0028691	-1	3R:23732279	0.278261	3R	23732279	G	A	CT	FALSE	115	640.6	AC=1;AF=0.500;AN=2;BaseQRankSum=-6.158;DP=115;ExcessHet=3.0103;FS=5.477;MLEAC=1;MLEAF=0.500;MQ=60.00;MQRankSum=0.000;QD=5.57;ReadPosRankSum=-1.766;SOR=0.327	GT:AD:DP:GQ:PL	0/1:83,32:115:99:648,0,2694	4	5.9203	5.87523	0.666956	6.44082	5.85144	3.98732
d225007	Ib	Rpn9	FBgn0028691	-1	3R:23732531	0.337662	3R	23732531	A	T	TA	FALSE	154	1347.6	AC=1;AF=0.500;AN=2;BaseQRankSum=2.230;DP=154;ExcessHet=3.0103;FS=3.075;MLEAC=1;MLEAF=0.500;MQ=60.00;MQRankSum=0.000;QD=8.75;ReadPosRankSum=-3.853;SOR=0.985	GT:AD:DP:GQ:PL	0/1:102,52:154:99:1355,0,2951	4	5.9203	5.87523	0.666956	6.44082	5.85144	3.98732
d225007	Ib	Rpt5	FBgn0028684	1	3R:23754154	1	3R	23754154	G	A	GA	FALSE	51	1739.03	AC=2;AF=1.00;AN=2;DP=51;ExcessHet=3.0103;FS=0.000;MLEAC=2;MLEAF=1.00;MQ=60.00;QD=34.10;SOR=0.813	GT:AD:DP:GQ:PL	1/1:0,51:51:99:1753,153,0	4	5.93216	6.10852	0.925004	5.71526	5.18509	3.98732
d225007	Ib	Pli	FBgn0025574	-1	3R:23889738	1	3R	23889738	A	G	TC	FALSE	87	2970.03	AC=2;AF=1.00;AN=2;DP=87;ExcessHet=3.0103;FS=0.000;MLEAC=2;MLEAF=1.00;MQ=60.00;QD=34.14;SOR=0.716	GT:AD:DP:GQ:PL	1/1:0,87:87:99:2984,260,0	4	2.52098	3.01329	0.738494	2.01983	2.035	3.98732
d225007	Ib	Gdh	FBgn0001098	-1	3R:23936168	0.378486	3R	23936168	C	G	GC	FALSE	252	2767.6	AC=1;AF=0.500;AN=2;BaseQRankSum=-0.353;DP=252;ExcessHet=3.0103;FS=11.662;MLEAC=1;MLEAF=0.500;MQ=60.00;MQRankSum=0.000;QD=11.03;ReadPosRankSum=0.123;SOR=1.373	GT:AD:DP:GQ:PL	0/1:156,95:251:99:2775,0,4680	4	6.73636	5.26871	0.00814535	4.37474	4.57326	3.98732
d225007	Ib	Gdh	FBgn0001098	-1	3R:23942634	0.696774	3R	23942634	G	A	CT	FALSE	155	3134.6	AC=1;AF=0.500;AN=2;BaseQRankSum=-1.087;DP=155;ExcessHet=3.0103;FS=2.267;MLEAC=1;MLEAF=0.500;MQ=60.00;MQRankSum=0.000;QD=20.22;ReadPosRankSum=0.237;SOR=0.522	GT:AD:DP:GQ:PL	0/1:47,108:155:99:3142,0,1198	4	6.73636	5.26871	0.00814535	4.37474	4.57326	3.98732
d225007	Ib	Rab7	FBgn0015795	1	3R:23993999	1	3R	23993999	G	A	GA	FALSE	88	2793.03	AC=2;AF=1.00;AN=2;DP=88;ExcessHet=3.0103;FS=0.000;MLEAC=2;MLEAF=1.00;MQ=60.00;QD=31.74;SOR=1.055	GT:AD:DP:GQ:PL	1/1:0,88:88:99:2807,264,0	4	5.39259	6.11489	0.505856	5.76257	5.43417	3.98732
d225007	Ib	Rab7	FBgn0015795	1	3R:23995450	1	3R	23995450	T	C	TC	FALSE	23	849.03	AC=2;AF=1.00;AN=2;DP=23;ExcessHet=3.0103;FS=0.000;MLEAC=2;MLEAF=1.00;MQ=60.00;QD=26.50;SOR=1.426	GT:AD:DP:GQ:PL	1/1:0,23:23:69:863,69,0	4	5.39259	6.11489	0.505856	5.76257	5.43417	3.98732
d225007	Ib	CG5746	FBgn0039186	-1	3R:24345948	1	3R	24345948	T	A	AT	FALSE	14	478.03	AC=2;AF=1.00;AN=2;DP=14;ExcessHet=3.0103;FS=0.000;MLEAC=2;MLEAF=1.00;MQ=60.00;QD=34.14;SOR=2.303	GT:AD:DP:GQ:PL	1/1:0,14:14:42:492,42,0	4	2.608	1.81747	0.0595902	0.821292	0.928672	3.98732
d225007	Ib	CG5746	FBgn0039186	-1	3R:24346347	1	3R	24346347	A	G	TC	FALSE	23	862.03	AC=2;AF=1.00;AN=2;DP=23;ExcessHet=3.0103;FS=0.000;MLEAC=2;MLEAF=1.00;MQ=60.00;QD=30.26;SOR=0.963	GT:AD:DP:GQ:PL	1/1:0,23:23:69:876,69,0	4	2.608	1.81747	0.0595902	0.821292	0.928672	3.98732
d225007	Ib	RpS27	FBgn0039300	-1	3R:25246184	0.168085	3R	25246184	C	T	GA	FALSE	472	1223.6	AC=1;AF=0.500;AN=2;BaseQRankSum=-7.344;DP=472;ExcessHet=3.0103;FS=1.732;MLEAC=1;MLEAF=0.500;MQ=60.00;MQRankSum=0.000;QD=2.60;ReadPosRankSum=2.259;SOR=0.524	GT:AD:DP:GQ:PL	0/1:391,79:470:99:1231,0,12296	4	11.2361	11.156	0.432717	10.4942	10.3856	3.98732
d225007	Ib	CLS	FBgn0039360	-1	3R:25685393	1	3R	25685393	T	A	AT	FALSE	76	2518.03	AC=2;AF=1.00;AN=2;DP=76;ExcessHet=3.0103;FS=0.000;MLEAC=2;MLEAF=1.00;MQ=60.00;QD=33.13;SOR=3.258	GT:AD:DP:GQ:PL	1/1:0,76:76:99:2532,228,0	4	2.76752	1.88796	0.563116	2.32657	2.18605	3.98732
d225007	Ib	CLS	FBgn0039360	-1	3R:25686689	1	3R	25686689	T	A	AT	FALSE	97	3100.03	AC=2;AF=1.00;AN=2;DP=97;ExcessHet=3.0103;FS=0.000;MLEAC=2;MLEAF=1.00;MQ=60.00;QD=31.96;SOR=0.756	GT:AD:DP:GQ:PL	1/1:0,97:97:99:3114,287,0	4	2.76752	1.88796	0.563116	2.32657	2.18605	3.98732
d225007	Ib	Ald1	FBgn0000064	-1	3R:26254310	0.557126	3R	26254310	T	A	AT	FALSE	849	14070.6	AC=1;AF=0.500;AN=2;BaseQRankSum=0.710;DP=849;ExcessHet=3.0103;FS=2.032;MLEAC=1;MLEAF=0.500;MQ=60.00;MQRankSum=0.000;QD=16.57;ReadPosRankSum=2.656;SOR=0.527	GT:AD:DP:GQ:PL	0/1:376,473:849:99:14078,0,11202	4	11.4026	10.0568	0.0414265	10.8637	11.1339	3.98732
d225007	Ib	Ald1	FBgn0000064	-1	3R:26254347	0.566826	3R	26254347	G	C	CG	FALSE	838	14919.6	AC=1;AF=0.500;AN=2;BaseQRankSum=-3.744;DP=838;ExcessHet=3.0103;FS=3.336;MLEAC=1;MLEAF=0.500;MQ=60.00;MQRankSum=0.000;QD=17.80;ReadPosRankSum=-2.509;SOR=0.487	GT:AD:DP:GQ:PL	0/1:363,475:838:99:14927,0,11115	4	11.4026	10.0568	0.0414265	10.8637	11.1339	3.98732
d225007	Ib	Ald1	FBgn0000064	-1	3R:26254449	0.557906	3R	26254449	G	T	CA	FALSE	900	15466.6	AC=1;AF=0.500;AN=2;BaseQRankSum=-14.663;DP=900;ExcessHet=3.0103;FS=1.134;MLEAC=1;MLEAF=0.500;MQ=60.00;MQRankSum=0.000;QD=17.22;ReadPosRankSum=1.327;SOR=0.584	GT:AD:DP:GQ:PL	0/1:397,501:898:99:15474,0,11899	4	11.4026	10.0568	0.0414265	10.8637	11.1339	3.98732
d225007	Ib	Ald1	FBgn0000064	-1	3R:26254539	0.496158	3R	26254539	G	A	CT	FALSE	911	16927.6	AC=1;AF=0.500;AN=2;BaseQRankSum=-10.730;DP=911;ExcessHet=3.0103;FS=2.443;MLEAC=1;MLEAF=0.500;MQ=60.00;MQRankSum=0.000;QD=18.58;ReadPosRankSum=0.248;SOR=0.797	GT:AD:DP:GQ:PL	0/1:459,452:911:99:16935,0,15821	4	11.4026	10.0568	0.0414265	10.8637	11.1339	3.98732
d225007	Ib	Ald1	FBgn0000064	-1	3R:26254561	0.502781	3R	26254561	T	A	AT	FALSE	900	15136.6	AC=1;AF=0.500;AN=2;BaseQRankSum=3.606;DP=900;ExcessHet=3.0103;FS=3.346;MLEAC=1;MLEAF=0.500;MQ=60.00;MQRankSum=0.000;QD=16.84;ReadPosRankSum=3.057;SOR=0.945	GT:AD:DP:GQ:PL	0/1:447,452:899:99:15144,0,16277	4	11.4026	10.0568	0.0414265	10.8637	11.1339	3.98732
d225007	Ib	Ald1	FBgn0000064	-1	3R:26255222	0.72886	3R	26255222	T	A	AT	FALSE	1089	21919.6	AC=1;AF=0.500;AN=2;BaseQRankSum=-6.818;DP=1089;ExcessHet=3.0103;FS=14.398;MLEAC=1;MLEAF=0.500;MQ=60.00;MQRankSum=0.000;QD=20.15;ReadPosRankSum=0.229;SOR=0.531	GT:AD:DP:GQ:PL	0/1:295,793:1088:99:21927,0,6662	4	11.4026	10.0568	0.0414265	10.8637	11.1339	3.98732
d225007	Ib	Ald1	FBgn0000064	-1	3R:26255318	0.576346	3R	26255318	G	T	CA	FALSE	1133	18535.6	AC=1;AF=0.500;AN=2;BaseQRankSum=-13.035;DP=1133;ExcessHet=3.0103;FS=9.490;MLEAC=1;MLEAF=0.500;MQ=60.00;MQRankSum=0.000;QD=16.36;ReadPosRankSum=1.788;SOR=1.089	GT:AD:DP:GQ:PL	0/1:480,653:1133:99:18543,0,14105	4	11.4026	10.0568	0.0414265	10.8637	11.1339	3.98732
d225007	Ib	Ald1	FBgn0000064	-1	3R:26257733	0.487819	3R	26257733	C	T	GA	FALSE	1729	24256.6	AC=1;AF=0.500;AN=2;BaseQRankSum=-24.199;DP=1729;ExcessHet=3.0103;FS=0.000;MLEAC=1;MLEAF=0.500;MQ=60.00;MQRankSum=0.000;QD=14.07;ReadPosRankSum=0.658;SOR=0.667	GT:AD:DP:GQ:PL	0/1:883,841:1724:99:24264,0,27675	4	11.4026	10.0568	0.0414265	10.8637	11.1339	3.98732
d225007	Ib	CG5447	FBgn0039427	1	3R:26453808	1	3R	26453808	T	C	TC	FALSE	61	2180.03	AC=2;AF=1.00;AN=2;DP=61;ExcessHet=3.0103;FS=0.000;MLEAC=2;MLEAF=1.00;MQ=60.00;QD=29.30;SOR=2.119	GT:AD:DP:GQ:PL	1/1:0,61:61:99:2194,182,0	4	2.49219	2.42453	0.817489	1.96622	1.7068	3.98732
d225007	Ib	CG5447	FBgn0039427	1	3R:26454421	1	3R	26454421	G	A	GA	FALSE	47	1565.03	AC=2;AF=1.00;AN=2;DP=47;ExcessHet=3.0103;FS=0.000;MLEAC=2;MLEAF=1.00;MQ=60.00;QD=33.30;SOR=2.160	GT:AD:DP:GQ:PL	1/1:0,47:47:99:1579,141,0	4	2.49219	2.42453	0.817489	1.96622	1.7068	3.98732
d225007	Ib	amon	FBgn0023179	-1	3R:26703754	1	3R	26703754	C	T	GA	FALSE	68	3084.03	AC=2;AF=1.00;AN=2;DP=68;ExcessHet=3.0103;FS=0.000;MLEAC=2;MLEAF=1.00;MQ=60.00;QD=30.75;SOR=2.235	GT:AD:DP:GQ:PL	1/1:0,68:68:99:3098,208,0	4	3.7941	5.3843	0.0246449	0.0396884	0.13839	3.98732
d225007	Ib	amon	FBgn0023179	-1	3R:26703756	1	3R	26703756	T	G	AC	FALSE	68	3084.03	AC=2;AF=1.00;AN=2;DP=68;ExcessHet=3.0103;FS=0.000;MLEAC=2;MLEAF=1.00;MQ=60.00;QD=27.05;SOR=2.235	GT:AD:DP:GQ:PL	1/1:0,68:68:99:3098,208,0	4	3.7941	5.3843	0.0246449	0.0396884	0.13839	3.98732
d225007	Ib	Hmu	FBgn0015737	1	3R:27291040	0.106383	3R	27291040	G	T	GT	FALSE	47	41.6	AC=1;AF=0.500;AN=2;BaseQRankSum=-3.260;DP=47;ExcessHet=3.0103;FS=8.465;MLEAC=1;MLEAF=0.500;MQ=60.00;MQRankSum=0.000;QD=0.89;ReadPosRankSum=0.834;SOR=1.884	GT:AD:DP:GQ:PL	0/1:42,5:47:49:49,0,1641	4	5.87173	5.77395	0.390105	2.59234	2.73469	3.98732
d225007	Ib	Gp93	FBgn0039562	1	3R:27951702	1	3R	27951702	C	T	CT	FALSE	125	5501.03	AC=2;AF=1.00;AN=2;DP=125;ExcessHet=3.0103;FS=0.000;MLEAC=2;MLEAF=1.00;MQ=60.00;QD=32.79;SOR=4.720	GT:AD:DP:GQ:PL	1/1:0,125:125:99:5515,376,0	4	5.46458	5.53278	0.962357	2.74479	2.53149	3.98732
d225007	Ib	Pkc98E	FBgn0003093	1	3R:29046438	1	3R	29046438	A	C	AC	FALSE	86	2900.03	AC=2;AF=1.00;AN=2;DP=86;ExcessHet=3.0103;FS=0.000;MLEAC=2;MLEAF=1.00;MQ=60.00;QD=33.72;SOR=2.780	GT:AD:DP:GQ:PL	1/1:0,86:86:99:2914,256,0	4	4.42269	4.69937	0.833844	1.73884	1.5978	3.98732
d225007	Ib	Pkc98E	FBgn0003093	1	3R:29046521	1	3R	29046521	G	A	GA	FALSE	134	4448.03	AC=2;AF=1.00;AN=2;DP=134;ExcessHet=3.0103;FS=0.000;MLEAC=2;MLEAF=1.00;MQ=60.00;QD=33.19;SOR=2.602	GT:AD:DP:GQ:PL	1/1:0,134:134:99:4462,402,0	4	4.42269	4.69937	0.833844	1.73884	1.5978	3.98732
d225007	Ib	Pkc98E	FBgn0003093	1	3R:29046587	1	3R	29046587	G	A	GA	FALSE	72	2488.03	AC=2;AF=1.00;AN=2;DP=72;ExcessHet=3.0103;FS=0.000;MLEAC=2;MLEAF=1.00;MQ=60.00;QD=34.56;SOR=2.964	GT:AD:DP:GQ:PL	1/1:0,72:72:99:2502,216,0	4	4.42269	4.69937	0.833844	1.73884	1.5978	3.98732
d225007	Ib	Pkc98E	FBgn0003093	1	3R:29046663	1	3R	29046663	G	A	GA	FALSE	107	3759.03	AC=2;AF=1.00;AN=2;DP=107;ExcessHet=3.0103;FS=0.000;MLEAC=2;MLEAF=1.00;MQ=60.00;QD=30.41;SOR=2.707	GT:AD:DP:GQ:PL	1/1:0,107:107:99:3773,320,0	4	4.42269	4.69937	0.833844	1.73884	1.5978	3.98732
d225007	Ib	Pglym78	FBgn0014869	1	3R:29149049	0.623779	3R	29149049	T	G	TG	FALSE	614	12573.6	AC=1;AF=0.500;AN=2;BaseQRankSum=14.637;DP=614;ExcessHet=3.0103;FS=4.192;MLEAC=1;MLEAF=0.500;MQ=60.00;MQRankSum=0.000;QD=20.48;ReadPosRankSum=0.008;SOR=0.766	GT:AD:DP:GQ:PL	0/1:231,383:614:99:12581,0,6065	4	10.0726	8.55606	0.377268	9.34799	10.0215	3.98732
d225007	Ib	Pglym78	FBgn0014869	1	3R:29149130	0.586334	3R	29149130	T	C	TC	FALSE	1087	20577.6	AC=1;AF=0.500;AN=2;BaseQRankSum=23.681;DP=1087;ExcessHet=3.0103;FS=0.543;MLEAC=1;MLEAF=0.500;MQ=60.00;MQRankSum=0.000;QD=19.00;ReadPosRankSum=2.177;SOR=0.771	GT:AD:DP:GQ:PL	0/1:448,635:1083:99:20585,0,10585	4	10.0726	8.55606	0.377268	9.34799	10.0215	3.98732
d225007	Ib	Pglym78	FBgn0014869	1	3R:29149232	0.605505	3R	29149232	C	G	CG	FALSE	1091	19456.6	AC=1;AF=0.500;AN=2;BaseQRankSum=-17.981;DP=1091;ExcessHet=3.0103;FS=2.510;MLEAC=1;MLEAF=0.500;MQ=60.00;MQRankSum=0.000;QD=17.85;ReadPosRankSum=-3.456;SOR=0.708	GT:AD:DP:GQ:PL	0/1:430,660:1090:99:19464,0,12792	4	10.0726	8.55606	0.377268	9.34799	10.0215	3.98732
d225007	Ib	eEF1gamma	FBgn0029176	1	3R:29221960	0.599099	3R	29221960	C	T	CT	FALSE	222	3797.6	AC=1;AF=0.500;AN=2;BaseQRankSum=-5.242;DP=222;ExcessHet=3.0103;FS=3.497;MLEAC=1;MLEAF=0.500;MQ=60.00;MQRankSum=0.000;QD=17.11;ReadPosRankSum=-1.303;SOR=0.960	GT:AD:DP:GQ:PL	0/1:89,133:222:99:3805,0,2640	4	9.3769	9.22772	0.857501	8.24884	8.24024	3.98732
d225007	Ib	Cisd2	FBgn0062442	-1	3R:29222758	0.473684	3R	29222758	A	G	TC	FALSE	114	1577.6	AC=1;AF=0.500;AN=2;BaseQRankSum=6.907;DP=114;ExcessHet=3.0103;FS=5.739;MLEAC=1;MLEAF=0.500;MQ=60.00;MQRankSum=0.000;QD=13.84;ReadPosRankSum=-0.169;SOR=0.936	GT:AD:DP:GQ:PL	0/1:60,54:114:99:1585,0,1236	4	6.57453	6.88852	0.938692	5.87993	5.77744	3.98732
d225007	Ib	Cnx99A	FBgn0015622	-1	3R:29315733	0.719457	3R	29315733	G	A	CT	FALSE	221	5363.6	AC=1;AF=0.500;AN=2;BaseQRankSum=-7.576;DP=221;ExcessHet=3.0103;FS=2.840;MLEAC=1;MLEAF=0.500;MQ=60.00;MQRankSum=0.000;QD=24.27;ReadPosRankSum=0.954;SOR=0.972	GT:AD:DP:GQ:PL	0/1:62,159:221:99:5371,0,1527	4	5.37514	5.28525	0.729489	2.58793	2.27049	3.98732
d225007	Ib	Cnx99A	FBgn0015622	-1	3R:29316807	1	3R	29316807	G	A	CT	FALSE	15	751.03	AC=2;AF=1.00;AN=2;DP=15;ExcessHet=3.0103;FS=0.000;MLEAC=2;MLEAF=1.00;MQ=60.00;QD=28.56;SOR=0.818	GT:AD:DP:GQ:PL	1/1:0,15:15:51:765,51,0	4	5.37514	5.28525	0.729489	2.58793	2.27049	3.98732
d225007	Ib	Cnx99A	FBgn0015622	-1	3R:29316822	1	3R	29316822	A	G	TC	FALSE	22	1066.03	AC=2;AF=1.00;AN=2;DP=22;ExcessHet=3.0103;FS=0.000;MLEAC=2;MLEAF=1.00;MQ=60.00;QD=31.03;SOR=1.931	GT:AD:DP:GQ:PL	1/1:0,22:22:72:1080,72,0	4	5.37514	5.28525	0.729489	2.58793	2.27049	3.98732
d225007	Ib	CG1907	FBgn0039674	1	3R:29619730	1	3R	29619730	C	T	CT	FALSE	110	5036.03	AC=2;AF=1.00;AN=2;DP=110;ExcessHet=3.0103;FS=0.000;MLEAC=2;MLEAF=1.00;MQ=60.00;QD=24.50;SOR=0.730	GT:AD:DP:GQ:PL	1/1:0,110:110:99:5050,343,0	4	2.96927	1.9565	0.114002	3.63121	3.23907	3.98732
d225007	Ib	CG1907	FBgn0039674	1	3R:29619778	1	3R	29619778	C	T	CT	FALSE	69	3205.03	AC=2;AF=1.00;AN=2;DP=69;ExcessHet=3.0103;FS=0.000;MLEAC=2;MLEAF=1.00;MQ=60.00;QD=24.15;SOR=1.385	GT:AD:DP:GQ:PL	1/1:0,69:69:99:3219,225,0	4	2.96927	1.9565	0.114002	3.63121	3.23907	3.98732
d225007	Ib	CG1907	FBgn0039674	1	3R:29620300	1	3R	29620300	C	T	CT	FALSE	63	2183.03	AC=2;AF=1.00;AN=2;DP=63;ExcessHet=3.0103;FS=0.000;MLEAC=2;MLEAF=1.00;MQ=60.00;QD=34.65;SOR=0.933	GT:AD:DP:GQ:PL	1/1:0,63:63:99:2197,188,0	4	2.96927	1.9565	0.114002	3.63121	3.23907	3.98732
d225007	Ib	CG1907	FBgn0039674	1	3R:29620486	1	3R	29620486	T	C	TC	FALSE	44	1546.03	AC=2;AF=1.00;AN=2;DP=44;ExcessHet=3.0103;FS=0.000;MLEAC=2;MLEAF=1.00;MQ=60.00;QD=27.46;SOR=0.784	GT:AD:DP:GQ:PL	1/1:0,44:44:99:1560,131,0	4	2.96927	1.9565	0.114002	3.63121	3.23907	3.98732
d225007	Ib	CG1907	FBgn0039674	1	3R:29620589	1	3R	29620589	G	C	GC	FALSE	33	1508.03	AC=2;AF=1.00;AN=2;DP=33;ExcessHet=3.0103;FS=0.000;MLEAC=2;MLEAF=1.00;MQ=60.00;QD=31.70;SOR=1.542	GT:AD:DP:GQ:PL	1/1:0,33:33:99:1522,102,0	4	2.96927	1.9565	0.114002	3.63121	3.23907	3.98732
d225007	Ib	Gycalpha99B	FBgn0013972	1	3R:29685123	1	3R	29685123	T	G	TG	FALSE	125	4458.03	AC=2;AF=1.00;AN=2;DP=125;ExcessHet=3.0103;FS=0.000;MLEAC=2;MLEAF=1.00;MQ=60.00;QD=34.33;SOR=2.284	GT:AD:DP:GQ:PL	1/1:0,125:125:99:4472,375,0	4	2.94659	2.53939	0.949914	0	0.0670297	3.98732
d225007	Ib	Gycalpha99B	FBgn0013972	1	3R:29685168	1	3R	29685168	T	C	TC	FALSE	118	4244.03	AC=2;AF=1.00;AN=2;DP=118;ExcessHet=3.0103;FS=0.000;MLEAC=2;MLEAF=1.00;MQ=60.00;QD=29.02;SOR=0.874	GT:AD:DP:GQ:PL	1/1:0,118:118:99:4258,354,0	4	2.94659	2.53939	0.949914	0	0.0670297	3.98732
d225007	Ib	Gycalpha99B	FBgn0013972	1	3R:29685225	1	3R	29685225	G	A	GA	FALSE	143	6494.03	AC=2;AF=1.00;AN=2;DP=143;ExcessHet=3.0103;FS=0.000;MLEAC=2;MLEAF=1.00;MQ=60.00;QD=24.12;SOR=0.956	GT:AD:DP:GQ:PL	1/1:0,143:143:99:6508,436,0	4	2.94659	2.53939	0.949914	0	0.0670297	3.98732
d225007	Ib	CG18731	FBgn0042213	1	3R:29725253	1	3R	29725253	C	G	CG	FALSE	334	12877	AC=2;AF=1.00;AN=2;DP=334;ExcessHet=3.0103;FS=0.000;MLEAC=2;MLEAF=1.00;MQ=60.00;QD=33.89;SOR=1.588	GT:AD:DP:GQ:PL	1/1:0,334:334:99:12891,1001,0	4	2.10343	1.68728	0.940366	1.91536	1.85703	3.98732
d225007	Ib	CG7601	FBgn0027583	-1	3R:29735639	1	3R	29735639	C	T	GA	FALSE	97	2874.03	AC=2;AF=1.00;AN=2;DP=97;ExcessHet=3.0103;FS=0.000;MLEAC=2;MLEAF=1.00;MQ=60.00;QD=29.63;SOR=1.469	GT:AD:DP:GQ:PL	1/1:0,97:97:99:2888,283,0	4	1.92099	1.10718	0.137517	0.820758	1.07005	3.98732
d225007	Ib	CG7601	FBgn0027583	-1	3R:29736508	1	3R	29736508	G	A	CT	FALSE	96	3086.03	AC=2;AF=1.00;AN=2;DP=96;ExcessHet=3.0103;FS=0.000;MLEAC=2;MLEAF=1.00;MQ=60.00;QD=32.15;SOR=1.251	GT:AD:DP:GQ:PL	1/1:0,96:96:99:3100,287,0	4	1.92099	1.10718	0.137517	0.820758	1.07005	3.98732
d225007	Ib	RpS8	FBgn0039713	1	3R:29862959	0.65778	3R	29862959	T	C	TC	FALSE	1841	38351.6	AC=1;AF=0.500;AN=2;BaseQRankSum=18.720;DP=1841;ExcessHet=3.0103;FS=0.558;MLEAC=1;MLEAF=0.500;MQ=60.00;MQRankSum=0.000;QD=20.87;ReadPosRankSum=0.487;SOR=0.604	GT:AD:DP:GQ:PL	0/1:629,1209:1838:99:38359,0,15943	4	12.4079	12.3182	0.473228	11.7965	11.7074	3.98732
d225007	Ib	janA	FBgn0001280	-1	3R:30038750	1	3R	30038750	C	T	GA	FALSE	75	2290.03	AC=2;AF=1.00;AN=2;DP=75;ExcessHet=3.0103;FS=0.000;MLEAC=2;MLEAF=1.00;MQ=60.00;QD=30.53;SOR=3.826	GT:AD:DP:GQ:PL	1/1:0,75:75:99:2304,225,0	4	4.74124	4.2695	0.873393	4.44041	4.42055	3.98732
d225007	Ib	janA	FBgn0001280	-1	3R:30038801	1	3R	30038801	A	G	TC	FALSE	68	2484.03	AC=2;AF=1.00;AN=2;DP=68;ExcessHet=3.0103;FS=0.000;MLEAC=2;MLEAF=1.00;MQ=60.00;QD=34.67;SOR=0.949	GT:AD:DP:GQ:PL	1/1:0,68:68:99:2498,204,0	4	4.74124	4.2695	0.873393	4.44041	4.42055	3.98732
d225007	Ib	janA	FBgn0001280	-1	3R:30039095	1	3R	30039095	C	G	GC	FALSE	106	3969.03	AC=2;AF=1.00;AN=2;DP=106;ExcessHet=3.0103;FS=0.000;MLEAC=2;MLEAF=1.00;MQ=60.00;QD=25.57;SOR=1.480	GT:AD:DP:GQ:PL	1/1:0,106:106:99:3983,319,0	4	4.74124	4.2695	0.873393	4.44041	4.42055	3.98732
d225007	Ib	janA	FBgn0001280	-1	3R:30039263	1	3R	30039263	C	T	GA	FALSE	116	3622.89	AC=2;AF=1.00;AN=2;DP=116;ExcessHet=3.0103;FS=0.000;MLEAC=2;MLEAF=1.00;MQ=60.00;QD=31.23;SOR=1.061	GT:AD:DP:GQ:PL	1/1:0,116:116:99:3637,346,0	4	4.74124	4.2695	0.873393	4.44041	4.42055	3.98732
d225007	Ib	janA	FBgn0001280	-1	3R:30039305	0.993007	3R	30039305	A	T	TA	FALSE	143	6320.03	AC=2;AF=1.00;AN=2;BaseQRankSum=-1.265;DP=143;ExcessHet=3.0103;FS=0.000;MLEAC=2;MLEAF=1.00;MQ=60.00;MQRankSum=0.000;QD=31.31;ReadPosRankSum=-0.462;SOR=1.080	GT:AD:DP:GQ:PL	1/1:1,142:143:99:6334,435,0	4	4.74124	4.2695	0.873393	4.44041	4.42055	3.98732
d225007	Ib	Tpi	FBgn0086355	-1	3R:30133353	0.447892	3R	30133353	C	T	GA	FALSE	1257	19970.6	AC=1;AF=0.500;AN=2;BaseQRankSum=-24.032;DP=1257;ExcessHet=3.0103;FS=1.117;MLEAC=1;MLEAF=0.500;MQ=60.00;MQRankSum=0.000;QD=15.89;ReadPosRankSum=-1.398;SOR=0.601	GT:AD:DP:GQ:PL	0/1:694,563:1257:99:19978,0,27481	4	9.70628	7.95355	0.0376291	9.03923	9.78331	3.98732
d225007	Ib	Tpi	FBgn0086355	-1	3R:30133374	0.432814	3R	30133374	G	T	CA	FALSE	1347	23310.6	AC=1;AF=0.500;AN=2;BaseQRankSum=-24.330;DP=1347;ExcessHet=3.0103;FS=1.750;MLEAC=1;MLEAF=0.500;MQ=60.00;MQRankSum=0.000;QD=17.31;ReadPosRankSum=4.179;SOR=0.740	GT:AD:DP:GQ:PL	0/1:764,583:1347:99:23318,0,31766	4	9.70628	7.95355	0.0376291	9.03923	9.78331	3.98732
d225007	Ib	Tpi	FBgn0086355	-1	3R:30133383	0.460988	3R	30133383	G	A	CT	FALSE	1397	23742.6	AC=1;AF=0.500;AN=2;BaseQRankSum=-21.114;DP=1397;ExcessHet=3.0103;FS=2.426;MLEAC=1;MLEAF=0.500;MQ=60.00;MQRankSum=0.000;QD=17.00;ReadPosRankSum=-0.417;SOR=0.549	GT:AD:DP:GQ:PL	0/1:753,644:1397:99:23750,0,30539	4	9.70628	7.95355	0.0376291	9.03923	9.78331	3.98732
d225007	Ib	Tpi	FBgn0086355	-1	3R:30133813	0.491468	3R	30133813	G	C	CG	FALSE	1173	18035.6	AC=1;AF=0.500;AN=2;BaseQRankSum=18.509;DP=1173;ExcessHet=3.0103;FS=2.446;MLEAC=1;MLEAF=0.500;MQ=60.00;MQRankSum=0.000;QD=15.39;ReadPosRankSum=2.093;SOR=0.542	GT:AD:DP:GQ:PL	0/1:596,576:1172:99:18043,0,17290	4	9.70628	7.95355	0.0376291	9.03923	9.78331	3.98732
d225007	Ib	VhaAC45RP	FBgn0051030	-1	3R:30165771	0.885542	3R	30165771	A	G	TC	FALSE	169	4658.6	AC=1;AF=0.500;AN=2;BaseQRankSum=4.026;DP=169;ExcessHet=3.0103;FS=3.252;MLEAC=1;MLEAF=0.500;MQ=60.00;MQRankSum=0.000;QD=28.06;ReadPosRankSum=-0.274;SOR=0.534	GT:AD:DP:GQ:PL	0/1:19,147:166:99:4666,0,132	4	6.3392	6.42463	0.721484	0.410326	0.49666	3.98732
d225007	Ib	VhaAC45RP	FBgn0051030	-1	3R:30165819	0.899371	3R	30165819	C	G	GC	FALSE	159	4869.6	AC=1;AF=0.500;AN=2;BaseQRankSum=3.763;DP=159;ExcessHet=3.0103;FS=3.768;MLEAC=1;MLEAF=0.500;MQ=60.00;MQRankSum=0.000;QD=30.63;ReadPosRankSum=0.781;SOR=1.302	GT:AD:DP:GQ:PL	0/1:16,143:159:69:4877,0,69	4	6.3392	6.42463	0.721484	0.410326	0.49666	3.98732
d225007	Ib	VhaAC45RP	FBgn0051030	-1	3R:30165876	0.89011	3R	30165876	G	A	CT	FALSE	182	5089.6	AC=1;AF=0.500;AN=2;BaseQRankSum=-5.912;DP=182;ExcessHet=3.0103;FS=1.957;MLEAC=1;MLEAF=0.500;MQ=60.00;MQRankSum=0.000;QD=27.96;ReadPosRankSum=0.270;SOR=0.647	GT:AD:DP:GQ:PL	0/1:20,162:182:99:5097,0,222	4	6.3392	6.42463	0.721484	0.410326	0.49666	3.98732
d225007	Ib	VhaAC45RP	FBgn0051030	-1	3R:30166113	0.872222	3R	30166113	G	A	CT	FALSE	180	4781.6	AC=1;AF=0.500;AN=2;BaseQRankSum=-6.801;DP=180;ExcessHet=3.0103;FS=4.256;MLEAC=1;MLEAF=0.500;MQ=60.00;MQRankSum=0.000;QD=26.56;ReadPosRankSum=0.922;SOR=0.385	GT:AD:DP:GQ:PL	0/1:23,157:180:99:4789,0,332	4	6.3392	6.42463	0.721484	0.410326	0.49666	3.98732
d225007	Ib	VhaAC45RP	FBgn0051030	-1	3R:30166160	0.862434	3R	30166160	T	A	AT	FALSE	189	6548.6	AC=1;AF=0.500;AN=2;BaseQRankSum=4.874;DP=189;ExcessHet=3.0103;FS=19.924;MLEAC=1;MLEAF=0.500;MQ=60.00;MQRankSum=0.000;QD=34.65;ReadPosRankSum=-0.045;SOR=0.815	GT:AD:DP:GQ:PL	0/1:26,163:189:99:6556,0,530	4	6.3392	6.42463	0.721484	0.410326	0.49666	3.98732
d225007	Ib	VhaAC45RP	FBgn0051030	-1	3R:30166242	0.833333	3R	30166242	G	C	CG	FALSE	151	4039.6	AC=1;AF=0.500;AN=2;BaseQRankSum=2.924;DP=151;ExcessHet=3.0103;FS=0.000;MLEAC=1;MLEAF=0.500;MQ=60.00;MQRankSum=0.000;QD=26.93;ReadPosRankSum=0.343;SOR=0.651	GT:AD:DP:GQ:PL	0/1:25,125:150:99:4047,0,476	4	6.3392	6.42463	0.721484	0.410326	0.49666	3.98732
d225007	Ib	Mlc2	FBgn0002773	-1	3R:30173047	0.575305	3R	30173047	G	A	CT	FALSE	738	11215.6	AC=1;AF=0.500;AN=2;BaseQRankSum=-12.422;DP=738;ExcessHet=3.0103;FS=0.568;MLEAC=1;MLEAF=0.500;MQ=60.00;MQRankSum=0.000;QD=15.22;ReadPosRankSum=0.022;SOR=0.760	GT:AD:DP:GQ:PL	0/1:313,424:737:99:11223,0,8624	4	8.19253	7.69483	0.920489	11.9513	12.5757	3.98732
d225007	Ib	Fer2LCH	FBgn0015221	1	3R:30389925	0.110016	3R	30389925	G	A	GA	FALSE	610	443.6	AC=1;AF=0.500;AN=2;BaseQRankSum=-1.004;DP=610;ExcessHet=3.0103;FS=3.144;MLEAC=1;MLEAF=0.500;MQ=60.00;MQRankSum=0.000;QD=0.73;ReadPosRankSum=-0.705;SOR=0.401	GT:AD:DP:GQ:PL	0/1:542,67:609:99:451,0,19165	4	9.06256	8.93053	0.802967	7.99417	7.64306	3.98732
d225007	Ib	Fer2LCH	FBgn0015221	1	3R:30390223	0.49464	3R	30390223	G	A	GA	FALSE	653	8825.6	AC=1;AF=0.500;AN=2;BaseQRankSum=-13.538;DP=653;ExcessHet=3.0103;FS=4.940;MLEAC=1;MLEAF=0.500;MQ=60.00;MQRankSum=0.000;QD=13.52;ReadPosRankSum=-0.681;SOR=0.984	GT:AD:DP:GQ:PL	0/1:330,323:653:99:8833,0,9998	4	9.06256	8.93053	0.802967	7.99417	7.64306	3.98732
d225007	Ib	tmod	FBgn0082582	1	3R:30577483	1	3R	30577483	T	C	TC	FALSE	42	1846.03	AC=2;AF=1.00;AN=2;DP=42;ExcessHet=3.0103;FS=0.000;MLEAC=2;MLEAF=1.00;MQ=60.00;QD=26.15;SOR=5.235	GT:AD:DP:GQ:PL	1/1:0,42:42:99:1860,126,0	4	5.81165	6.22782	0.293856	5.59956	5.11275	3.98732
d225007	Ib	zfh1	FBgn0004606	1	3R:30787306	1	3R	30787306	G	A	GA	FALSE	39	1385.03	AC=2;AF=1.00;AN=2;DP=39;ExcessHet=3.0103;FS=0.000;MLEAC=2;MLEAF=1.00;MQ=60.00;QD=26.01;SOR=3.202	GT:AD:DP:GQ:PL	1/1:0,39:39:99:1399,117,0	4	2.8207	5.07174	8.83719e-10	1.00111	0.940925	3.98732
d225007	Ib	zfh1	FBgn0004606	1	3R:30787451	1	3R	30787451	T	A	TA	FALSE	23	928.03	AC=2;AF=1.00;AN=2;DP=23;ExcessHet=3.0103;FS=0.000;MLEAC=2;MLEAF=1.00;MQ=60.00;QD=27.04;SOR=1.179	GT:AD:DP:GQ:PL	1/1:0,23:23:69:942,69,0	4	2.8207	5.07174	8.83719e-10	1.00111	0.940925	3.98732
d225007	Ib	zfh1	FBgn0004606	1	3R:30787850	1	3R	30787850	A	T	AT	FALSE	27	1179.03	AC=2;AF=1.00;AN=2;DP=27;ExcessHet=3.0103;FS=0.000;MLEAC=2;MLEAF=1.00;MQ=60.00;QD=34.84;SOR=1.302	GT:AD:DP:GQ:PL	1/1:0,27:27:84:1193,84,0	4	2.8207	5.07174	8.83719e-10	1.00111	0.940925	3.98732
d225007	Ib	zfh1	FBgn0004606	1	3R:30788070	1	3R	30788070	G	A	GA	FALSE	38	1257.03	AC=2;AF=1.00;AN=2;DP=38;ExcessHet=3.0103;FS=0.000;MLEAC=2;MLEAF=1.00;MQ=60.00;QD=33.97;SOR=0.859	GT:AD:DP:GQ:PL	1/1:0,37:37:99:1271,111,0	4	2.8207	5.07174	8.83719e-10	1.00111	0.940925	3.98732
d225007	Ib	zfh1	FBgn0004606	1	3R:30788824	0.537037	3R	30788824	G	A	GA	FALSE	108	1433.6	AC=1;AF=0.500;AN=2;BaseQRankSum=-5.985;DP=108;ExcessHet=3.0103;FS=9.463;MLEAC=1;MLEAF=0.500;MQ=60.00;MQRankSum=0.000;QD=13.27;ReadPosRankSum=-0.034;SOR=0.248	GT:AD:DP:GQ:PL	0/1:50,58:108:99:1441,0,1482	4	2.8207	5.07174	8.83719e-10	1.00111	0.940925	3.98732
d225007	Ib	zfh1	FBgn0004606	1	3R:30788875	0.518797	3R	30788875	G	C	GC	FALSE	133	2048.6	AC=1;AF=0.500;AN=2;BaseQRankSum=-1.200;DP=133;ExcessHet=3.0103;FS=24.751;MLEAC=1;MLEAF=0.500;MQ=60.00;MQRankSum=0.000;QD=15.40;ReadPosRankSum=-1.671;SOR=0.063	GT:AD:DP:GQ:PL	0/1:64,69:133:99:2056,0,1884	4	2.8207	5.07174	8.83719e-10	1.00111	0.940925	3.98732
d225007	Ib	zfh1	FBgn0004606	1	3R:30789005	0.650794	3R	30789005	T	C	TC	FALSE	63	1446.6	AC=1;AF=0.500;AN=2;BaseQRankSum=4.514;DP=63;ExcessHet=3.0103;FS=20.337;MLEAC=1;MLEAF=0.500;MQ=60.00;MQRankSum=0.000;QD=22.96;ReadPosRankSum=2.271;SOR=0.039	GT:AD:DP:GQ:PL	0/1:22,41:63:99:1454,0,446	4	2.8207	5.07174	8.83719e-10	1.00111	0.940925	3.98732
d225007	Ib	cindr	FBgn0027598	1	3R:30808701	1	3R	30808701	C	A	CA	FALSE	62	1946.03	AC=2;AF=1.00;AN=2;DP=62;ExcessHet=3.0103;FS=0.000;MLEAC=2;MLEAF=1.00;MQ=60.00;QD=31.39;SOR=1.057	GT:AD:DP:GQ:PL	1/1:0,62:62:99:1960,184,0	4	3.79459	4.09584	0.742166	2.21586	2.35913	3.98732
d225007	Ib	cindr	FBgn0027598	1	3R:30808716	1	3R	30808716	A	T	AT	FALSE	45	1476.03	AC=2;AF=1.00;AN=2;DP=45;ExcessHet=3.0103;FS=0.000;MLEAC=2;MLEAF=1.00;MQ=60.00;QD=32.80;SOR=1.038	GT:AD:DP:GQ:PL	1/1:0,45:45:99:1490,134,0	4	3.79459	4.09584	0.742166	2.21586	2.35913	3.98732
d225007	Ib	cindr	FBgn0027598	1	3R:30808815	1	3R	30808815	C	G	CG	FALSE	62	2065.03	AC=2;AF=1.00;AN=2;DP=62;ExcessHet=3.0103;FS=0.000;MLEAC=2;MLEAF=1.00;MQ=60.00;QD=33.31;SOR=2.019	GT:AD:DP:GQ:PL	1/1:0,62:62:99:2079,185,0	4	3.79459	4.09584	0.742166	2.21586	2.35913	3.98732
d225007	Ib	cindr	FBgn0027598	1	3R:30808849	1	3R	30808849	C	A	CA	FALSE	43	1424.03	AC=2;AF=1.00;AN=2;DP=43;ExcessHet=3.0103;FS=0.000;MLEAC=2;MLEAF=1.00;MQ=60.00;QD=33.12;SOR=3.417	GT:AD:DP:GQ:PL	1/1:0,43:43:99:1438,129,0	4	3.79459	4.09584	0.742166	2.21586	2.35913	3.98732
d225007	Ib	cindr	FBgn0027598	1	3R:30808926	1	3R	30808926	G	T	GT	FALSE	29	1017.03	AC=2;AF=1.00;AN=2;DP=29;ExcessHet=3.0103;FS=0.000;MLEAC=2;MLEAF=1.00;MQ=60.00;QD=31.64;SOR=6.804	GT:AD:DP:GQ:PL	1/1:0,29:29:87:1031,87,0	4	3.79459	4.09584	0.742166	2.21586	2.35913	3.98732
d225007	Ib	5-HT7	FBgn0004573	-1	3R:30968622	1	3R	30968622	A	G	TC	FALSE	81	2895.03	AC=2;AF=1.00;AN=2;DP=81;ExcessHet=3.0103;FS=0.000;MLEAC=2;MLEAF=1.00;MQ=60.00;QD=34.62;SOR=1.759	GT:AD:DP:GQ:PL	1/1:0,81:81:99:2909,241,0	4	2.11725	0.538474	5.53295e-05	0.0501364	0.0352084	3.98732
d225007	Ib	Chchd3	FBgn0010808	-1	3R:31052670	0.267123	3R	31052670	A	G	TC	FALSE	146	967.6	AC=1;AF=0.500;AN=2;BaseQRankSum=6.712;DP=146;ExcessHet=3.0103;FS=0.000;MLEAC=1;MLEAF=0.500;MQ=60.00;MQRankSum=0.000;QD=6.63;ReadPosRankSum=0.778;SOR=0.435	GT:AD:DP:GQ:PL	0/1:107,39:146:99:975,0,3005	4	5.13013	5.1048	0.874422	5.18415	5.24493	3.98732
d225007	Ib	Chchd3	FBgn0010808	-1	3R:31052703	0.268571	3R	31052703	A	C	TG	FALSE	175	1138.6	AC=1;AF=0.500;AN=2;BaseQRankSum=5.425;DP=175;ExcessHet=3.0103;FS=2.049;MLEAC=1;MLEAF=0.500;MQ=60.00;MQRankSum=0.000;QD=6.51;ReadPosRankSum=-2.326;SOR=0.918	GT:AD:DP:GQ:PL	0/1:128,47:175:99:1146,0,3697	4	5.13013	5.1048	0.874422	5.18415	5.24493	3.98732
d225007	Ib	Chchd3	FBgn0010808	-1	3R:31052800	0.225	3R	31052800	A	G	TC	FALSE	201	1060.6	AC=1;AF=0.500;AN=2;BaseQRankSum=7.412;DP=201;ExcessHet=3.0103;FS=5.816;MLEAC=1;MLEAF=0.500;MQ=60.00;MQRankSum=0.000;QD=5.30;ReadPosRankSum=0.802;SOR=0.347	GT:AD:DP:GQ:PL	0/1:155,45:200:99:1068,0,4087	4	5.13013	5.1048	0.874422	5.18415	5.24493	3.98732
d225007	Ib	Chchd3	FBgn0010808	-1	3R:31052844	0.352657	3R	31052844	A	T	TA	FALSE	207	1588.6	AC=1;AF=0.500;AN=2;BaseQRankSum=-6.404;DP=207;ExcessHet=3.0103;FS=1.151;MLEAC=1;MLEAF=0.500;MQ=60.00;MQRankSum=0.000;QD=7.67;ReadPosRankSum=-1.650;SOR=0.578	GT:AD:DP:GQ:PL	0/1:134,73:207:99:1596,0,3774	4	5.13013	5.1048	0.874422	5.18415	5.24493	3.98732
d225007	Ib	Chchd3	FBgn0010808	-1	3R:31052880	0.304527	3R	31052880	A	C	TG	FALSE	244	1842.6	AC=1;AF=0.500;AN=2;BaseQRankSum=6.947;DP=244;ExcessHet=3.0103;FS=1.171;MLEAC=1;MLEAF=0.500;MQ=60.00;MQRankSum=0.000;QD=7.58;ReadPosRankSum=1.105;SOR=0.585	GT:AD:DP:GQ:PL	0/1:169,74:243:99:1850,0,4804	4	5.13013	5.1048	0.874422	5.18415	5.24493	3.98732
d225007	Ib	CG1607	FBgn0039844	1	3R:31382206	1	3R	31382206	T	G	TG	FALSE	149	6524.03	AC=2;AF=1.00;AN=2;DP=149;ExcessHet=3.0103;FS=0.000;MLEAC=2;MLEAF=1.00;MQ=60.00;QD=31.52;SOR=1.578	GT:AD:DP:GQ:PL	1/1:0,149:149:99:6538,466,0	4	3.58874	1.54836	0.00112252	0.64228	0.739818	3.98732
d225007	Ib	CG1607	FBgn0039844	1	3R:31382227	1	3R	31382227	A	C	AC	FALSE	139	6833.03	AC=2;AF=1.00;AN=2;DP=139;ExcessHet=3.0103;FS=0.000;MLEAC=2;MLEAF=1.00;MQ=60.00;QD=31.40;SOR=1.280	GT:AD:DP:GQ:PL	1/1:0,139:139:99:6847,464,0	4	3.58874	1.54836	0.00112252	0.64228	0.739818	3.98732
d225007	Ib	CG1607	FBgn0039844	1	3R:31382244	1	3R	31382244	T	A	TA	FALSE	204	9301.03	AC=2;AF=1.00;AN=2;DP=204;ExcessHet=3.0103;FS=0.000;MLEAC=2;MLEAF=1.00;MQ=60.00;QD=31.13;SOR=1.817	GT:AD:DP:GQ:PL	1/1:0,204:204:99:9315,623,0	4	3.58874	1.54836	0.00112252	0.64228	0.739818	3.98732
d225007	Ib	CG1607	FBgn0039844	1	3R:31390703	1	3R	31390703	C	A	CA	FALSE	42	1372.03	AC=2;AF=1.00;AN=2;DP=42;ExcessHet=3.0103;FS=0.000;MLEAC=2;MLEAF=1.00;MQ=60.00;QD=32.67;SOR=1.721	GT:AD:DP:GQ:PL	1/1:0,42:42:99:1386,125,0	4	3.58874	1.54836	0.00112252	0.64228	0.739818	3.98732
d225007	Ib	CycG	FBgn0039858	-1	3R:31600574	1	3R	31600574	G	A	CT	FALSE	210	7189.03	AC=2;AF=1.00;AN=2;DP=210;ExcessHet=3.0103;FS=0.000;MLEAC=2;MLEAF=1.00;MQ=60.00;QD=34.23;SOR=1.018	GT:AD:DP:GQ:PL	1/1:0,210:210:99:7203,630,0	4	6.749	7.09638	0.463947	5.43584	5.80647	3.98732
d225007	Ib	eEF1alpha2	FBgn0000557	1	3R:31742823	0.584296	3R	31742823	C	T	CT	FALSE	433	7650.6	AC=1;AF=0.500;AN=2;BaseQRankSum=-11.192;DP=433;ExcessHet=3.0103;FS=1.785;MLEAC=1;MLEAF=0.500;MQ=60.00;MQRankSum=0.000;QD=17.67;ReadPosRankSum=1.230;SOR=0.885	GT:AD:DP:GQ:PL	0/1:180,253:433:99:7658,0,5296	4	8.41437	8.53635	0.934398	0.57658	0.553481	3.98732
d225007	Ib	sip3	FBgn0039875	1	3R:31773591	1	3R	31773591	C	T	CT	FALSE	35	1108.03	AC=2;AF=1.00;AN=2;DP=35;ExcessHet=3.0103;FS=0.000;MLEAC=2;MLEAF=1.00;MQ=60.00;QD=31.66;SOR=1.148	GT:AD:DP:GQ:PL	1/1:0,35:35:99:1122,105,0	4	3.00034	2.77689	0.698429	1.50935	1.4458	3.98732
d225007	Ib	CG9776	FBgn0027866	-1	3R:4327955	1	3R	4327955	G	A	CT	FALSE	20	866.03	AC=2;AF=1.00;AN=2;DP=20;ExcessHet=3.0103;FS=0.000;MLEAC=2;MLEAF=1.00;MQ=60.00;QD=32.58;SOR=4.615	GT:AD:DP:GQ:PL	1/1:0,20:20:60:880,60,0	4	1.91917	1.47521	0.0215595	0.874673	0.872167	3.98732
d225007	Ib	Calr	FBgn0005585	-1	3R:9629425	0.248588	3R	9629425	T	A	AT	FALSE	354	2777.6	AC=1;AF=0.500;AN=2;BaseQRankSum=-2.351;DP=354;ExcessHet=3.0103;FS=147.845;MLEAC=1;MLEAF=0.500;MQ=60.00;MQRankSum=0.000;QD=7.85;ReadPosRankSum=-4.800;SOR=6.196	GT:AD:DP:GQ:PL	0/1:266,88:354:99:2785,0,11039	4	8.00271	7.91268	0.863881	5.21074	5.17307	3.98732
d225007	Ib	CaMKII	FBgn0264607	-1	4:1036249	0.35625	4	1036249	A	G	TC	FALSE	160	1485.6	AC=1;AF=0.500;AN=2;BaseQRankSum=2.558;DP=160;ExcessHet=3.0103;FS=69.204;MLEAC=1;MLEAF=0.500;MQ=60.00;MQRankSum=0.000;QD=9.29;ReadPosRankSum=-7.506;SOR=4.257	GT:AD:DP:GQ:PL	0/1:103,57:160:99:1493,0,2834	4	5.2182	6.31018	0.00382197	4.24825	4.00233	3.98732
d225007	Ib	CG17841	FBgn0028480	1	X:10382813	0.966667	X	10382813	G	A	GA	FALSE	30	892.03	AC=2;AF=1.00;AN=2;BaseQRankSum=-1.074;DP=30;ExcessHet=3.0103;FS=0.000;MLEAC=2;MLEAF=1.00;MQ=60.00;MQRankSum=0.000;QD=29.73;ReadPosRankSum=1.050;SOR=0.743	GT:AD:DP:GQ:PL	1/1:1,29:30:53:906,53,0	4	4.41273	3.42188	0.0598747	1.59501	1.38701	3.98732
d225007	Ib	Neb-cGP	FBgn0083167	1	X:10460939	0.102253	X	10460939	G	A	GA	FALSE	577	259.6	AC=1;AF=0.500;AN=2;BaseQRankSum=-6.322;DP=577;ExcessHet=3.0103;FS=0.000;MLEAC=1;MLEAF=0.500;MQ=60.00;MQRankSum=0.000;QD=0.45;ReadPosRankSum=-1.678;SOR=0.711	GT:AD:DP:GQ:PL	0/1:518,59:577:99:267,0,17476	4	9.99907	9.88664	0.940366	8.67523	8.94455	3.98732
d225007	Ib	fne	FBgn0086675	1	X:12941794	0.225225	X	12941794	G	A	GA	FALSE	222	988.6	AC=1;AF=0.500;AN=2;BaseQRankSum=-1.020;DP=222;ExcessHet=3.0103;FS=0.594;MLEAC=1;MLEAF=0.500;MQ=60.00;MQRankSum=0.000;QD=4.45;ReadPosRankSum=0.822;SOR=0.619	GT:AD:DP:GQ:PL	0/1:172,50:222:99:996,0,5342	4	5.96307	6.53372	0.241222	0.287395	0.290412	3.98732
d225007	Ib	HIP-R	FBgn0029676	1	X:3791830	0.272727	X	3791830	G	A	GA	FALSE	22	196.6	AC=1;AF=0.500;AN=2;BaseQRankSum=4.100;DP=22;ExcessHet=3.0103;FS=29.485;MLEAC=1;MLEAF=0.500;MQ=60.00;MQRankSum=0.000;QD=8.94;ReadPosRankSum=3.135;SOR=3.893	GT:AD:DP:GQ:PL	0/1:16,6:22:99:204,0,654	4	4.8448	5.89734	0.0113057	3.12553	2.63486	3.98732
d225007	Ib	Appl	FBgn0000108	1	X:578853	0.248588	X	578853	G	A	GA	FALSE	177	887.6	AC=1;AF=0.500;AN=2;BaseQRankSum=-3.646;DP=177;ExcessHet=3.0103;FS=6.500;MLEAC=1;MLEAF=0.500;MQ=60.00;MQRankSum=0.000;QD=5.01;ReadPosRankSum=-1.546;SOR=0.526	GT:AD:DP:GQ:PL	0/1:133,44:177:99:895,0,4646	4	6.49275	6.40458	0.874244	0.273023	0.153435	3.98732
d225008	Ib	CG33303	FBgn0053303	-1	2L:10374282	0.606557	2L	10374282	A	T	TA	FALSE	61	942.6	AC=1;AF=0.500;AN=2;BaseQRankSum=-1.746;DP=61;ExcessHet=3.0103;FS=2.896;MLEAC=1;MLEAF=0.500;MQ=60.00;MQRankSum=0.000;QD=15.45;ReadPosRankSum=-1.725;SOR=1.345	GT:AD:DP:GQ:PL	0/1:24,37:61:99:950,0,558	4	4.82255	3.93282	0.505552	2.43097	2.84372	0
d225008	Ib	CG33303	FBgn0053303	-1	2L:10374508	0.68932	2L	10374508	A	G	TC	FALSE	103	2193.6	AC=1;AF=0.500;AN=2;BaseQRankSum=3.846;DP=103;ExcessHet=3.0103;FS=7.605;MLEAC=1;MLEAF=0.500;MQ=60.00;MQRankSum=0.000;QD=21.30;ReadPosRankSum=-0.609;SOR=0.243	GT:AD:DP:GQ:PL	0/1:32,71:103:99:2201,0,763	4	4.82255	3.93282	0.505552	2.43097	2.84372	0
d225008	Ib	CG33303	FBgn0053303	-1	2L:10374631	0.695238	2L	10374631	G	A	CT	FALSE	105	2030.6	AC=1;AF=0.500;AN=2;BaseQRankSum=-4.549;DP=105;ExcessHet=3.0103;FS=5.322;MLEAC=1;MLEAF=0.500;MQ=60.00;MQRankSum=0.000;QD=19.34;ReadPosRankSum=1.000;SOR=0.339	GT:AD:DP:GQ:PL	0/1:32,73:105:99:2038,0,844	4	4.82255	3.93282	0.505552	2.43097	2.84372	0
d225008	Ib	CG33303	FBgn0053303	-1	2L:10374757	0.685484	2L	10374757	G	A	CT	FALSE	124	2167.6	AC=1;AF=0.500;AN=2;BaseQRankSum=-7.788;DP=124;ExcessHet=3.0103;FS=9.851;MLEAC=1;MLEAF=0.500;MQ=60.00;MQRankSum=0.000;QD=17.48;ReadPosRankSum=0.774;SOR=1.562	GT:AD:DP:GQ:PL	0/1:39,85:124:99:2175,0,1073	4	4.82255	3.93282	0.505552	2.43097	2.84372	0
d225008	Ib	CG33303	FBgn0053303	-1	2L:10374889	0.660377	2L	10374889	C	G	GC	FALSE	106	2046.6	AC=1;AF=0.500;AN=2;BaseQRankSum=-0.876;DP=106;ExcessHet=3.0103;FS=0.770;MLEAC=1;MLEAF=0.500;MQ=60.00;MQRankSum=0.000;QD=19.31;ReadPosRankSum=1.217;SOR=0.549	GT:AD:DP:GQ:PL	0/1:36,70:106:99:2054,0,993	4	4.82255	3.93282	0.505552	2.43097	2.84372	0
d225008	Ib	CG33303	FBgn0053303	-1	2L:10374901	0.656	2L	10374901	G	C	CG	FALSE	126	2325.6	AC=1;AF=0.500;AN=2;BaseQRankSum=-4.600;DP=126;ExcessHet=3.0103;FS=2.398;MLEAC=1;MLEAF=0.500;MQ=60.00;MQRankSum=0.000;QD=18.60;ReadPosRankSum=0.602;SOR=0.495	GT:AD:DP:GQ:PL	0/1:43,82:125:99:2333,0,1178	4	4.82255	3.93282	0.505552	2.43097	2.84372	0
d225008	Ib	CG33303	FBgn0053303	-1	2L:10375153	0.582781	2L	10375153	A	G	TC	FALSE	151	2650.6	AC=1;AF=0.500;AN=2;BaseQRankSum=6.824;DP=151;ExcessHet=3.0103;FS=0.000;MLEAC=1;MLEAF=0.500;MQ=60.00;MQRankSum=0.000;QD=17.55;ReadPosRankSum=0.319;SOR=0.683	GT:AD:DP:GQ:PL	0/1:63,88:151:99:2658,0,1494	4	4.82255	3.93282	0.505552	2.43097	2.84372	0
d225008	Ib	CG33303	FBgn0053303	-1	2L:10375194	0.630769	2L	10375194	C	T	GA	FALSE	130	3291.6	AC=1;AF=0.500;AN=2;BaseQRankSum=-5.073;DP=130;ExcessHet=3.0103;FS=0.677;MLEAC=1;MLEAF=0.500;MQ=60.00;MQRankSum=0.000;QD=25.32;ReadPosRankSum=-1.165;SOR=0.613	GT:AD:DP:GQ:PL	0/1:48,82:130:99:3299,0,1702	4	4.82255	3.93282	0.505552	2.43097	2.84372	0
d225008	Ib	CG33303	FBgn0053303	-1	2L:10375197	0.639098	2L	10375197	A	G	TC	FALSE	133	3291.6	AC=1;AF=0.500;AN=2;BaseQRankSum=4.873;DP=133;ExcessHet=3.0103;FS=0.000;MLEAC=1;MLEAF=0.500;MQ=60.00;MQRankSum=0.000;QD=24.75;ReadPosRankSum=-1.422;SOR=0.672	GT:AD:DP:GQ:PL	0/1:48,85:133:99:3299,0,1702	4	4.82255	3.93282	0.505552	2.43097	2.84372	0
d225008	Ib	CG33303	FBgn0053303	-1	2L:10375320	0.754098	2L	10375320	G	A	CT	FALSE	122	2679.6	AC=1;AF=0.500;AN=2;BaseQRankSum=-4.386;DP=122;ExcessHet=3.0103;FS=6.851;MLEAC=1;MLEAF=0.500;MQ=60.00;MQRankSum=0.000;QD=21.96;ReadPosRankSum=1.128;SOR=0.694	GT:AD:DP:GQ:PL	0/1:30,92:122:99:2687,0,691	4	4.82255	3.93282	0.505552	2.43097	2.84372	0
d225008	Ib	CG33303	FBgn0053303	-1	2L:10375492	0.607843	2L	10375492	T	G	AC	FALSE	102	1832.6	AC=1;AF=0.500;AN=2;BaseQRankSum=4.774;DP=102;ExcessHet=3.0103;FS=5.671;MLEAC=1;MLEAF=0.500;MQ=60.00;MQRankSum=0.000;QD=17.97;ReadPosRankSum=-0.230;SOR=1.360	GT:AD:DP:GQ:PL	0/1:40,62:102:99:1840,0,968	4	4.82255	3.93282	0.505552	2.43097	2.84372	0
d225008	Ib	salr	FBgn0000287	1	2L:11359194	1	2L	11359194	G	A	GA	FALSE	73	2137.03	AC=2;AF=1.00;AN=2;DP=73;ExcessHet=3.0103;FS=0.000;MLEAC=2;MLEAF=1.00;MQ=60.00;QD=29.27;SOR=1.426	GT:AD:DP:GQ:PL	1/1:0,73:73:99:2151,218,0	4	3.36969	2.9991	0.771618	0.202178	0.0214256	0
d225008	Ib	salr	FBgn0000287	1	2L:11373140	1	2L	11373140	G	T	GT	FALSE	43	2011.03	AC=2;AF=1.00;AN=2;DP=43;ExcessHet=3.0103;FS=0.000;MLEAC=2;MLEAF=1.00;MQ=60.00;QD=26.33;SOR=3.109	GT:AD:DP:GQ:PL	1/1:0,43:43:99:2025,138,0	4	3.36969	2.9991	0.771618	0.202178	0.0214256	0
d225008	Ib	salr	FBgn0000287	1	2L:11373146	1	2L	11373146	C	G	CG	FALSE	61	2588.03	AC=2;AF=1.00;AN=2;DP=61;ExcessHet=3.0103;FS=0.000;MLEAC=2;MLEAF=1.00;MQ=60.00;QD=31.14;SOR=3.611	GT:AD:DP:GQ:PL	1/1:0,61:61:99:2602,184,0	4	3.36969	2.9991	0.771618	0.202178	0.0214256	0
d225008	Ib	salr	FBgn0000287	1	2L:11373158	1	2L	11373158	T	G	TG	FALSE	67	2179.03	AC=2;AF=1.00;AN=2;DP=67;ExcessHet=3.0103;FS=0.000;MLEAC=2;MLEAF=1.00;MQ=60.00;QD=32.52;SOR=3.360	GT:AD:DP:GQ:PL	1/1:0,67:67:99:2193,200,0	4	3.36969	2.9991	0.771618	0.202178	0.0214256	0
d225008	Ib	salr	FBgn0000287	1	2L:11373194	1	2L	11373194	G	A	GA	FALSE	84	2741.03	AC=2;AF=1.00;AN=2;DP=84;ExcessHet=3.0103;FS=0.000;MLEAC=2;MLEAF=1.00;MQ=60.00;QD=32.63;SOR=3.153	GT:AD:DP:GQ:PL	1/1:0,84:84:99:2755,252,0	4	3.36969	2.9991	0.771618	0.202178	0.0214256	0
d225008	Ib	salr	FBgn0000287	1	2L:11373210	1	2L	11373210	C	G	CG	FALSE	91	3039.03	AC=2;AF=1.00;AN=2;DP=91;ExcessHet=3.0103;FS=0.000;MLEAC=2;MLEAF=1.00;MQ=60.00;QD=33.40;SOR=2.783	GT:AD:DP:GQ:PL	1/1:0,91:91:99:3053,272,0	4	3.36969	2.9991	0.771618	0.202178	0.0214256	0
d225008	Ib	CG4577	FBgn0031306	1	2L:1140621	0.154412	2L	1140621	T	A	TA	FALSE	136	290.6	AC=1;AF=0.500;AN=2;BaseQRankSum=-2.436;DP=136;ExcessHet=3.0103;FS=21.044;MLEAC=1;MLEAF=0.500;MQ=60.00;MQRankSum=0.000;QD=2.14;ReadPosRankSum=-6.334;SOR=2.802	GT:AD:DP:GQ:PL	0/1:115,21:136:99:298,0,3435	4	5.85538	5.05184	0.659084	0.404889	0.874998	0
d225008	Ib	Pex19	FBgn0032407	1	2L:12094088	0.196078	2L	12094088	C	T	CT	FALSE	153	484.6	AC=1;AF=0.500;AN=2;BaseQRankSum=-6.112;DP=153;ExcessHet=3.0103;FS=27.709;MLEAC=1;MLEAF=0.500;MQ=60.00;MQRankSum=0.000;QD=3.17;ReadPosRankSum=-5.334;SOR=2.894	GT:AD:DP:GQ:PL	0/1:123,30:153:99:492,0,3793	4	5.52679	4.58011	0.198542	3.35329	3.35545	0
d225008	Ib	Pex19	FBgn0032407	1	2L:12094556	0.493506	2L	12094556	G	A	GA	FALSE	231	3263.6	AC=1;AF=0.500;AN=2;BaseQRankSum=-6.971;DP=231;ExcessHet=3.0103;FS=14.812;MLEAC=1;MLEAF=0.500;MQ=60.00;MQRankSum=0.000;QD=14.13;ReadPosRankSum=1.763;SOR=1.444	GT:AD:DP:GQ:PL	0/1:117,114:231:99:3271,0,3483	4	5.52679	4.58011	0.198542	3.35329	3.35545	0
d225008	Ib	Pex19	FBgn0032407	1	2L:12094626	0.490566	2L	12094626	T	C	TC	FALSE	159	2347.6	AC=1;AF=0.500;AN=2;BaseQRankSum=7.871;DP=159;ExcessHet=3.0103;FS=0.000;MLEAC=1;MLEAF=0.500;MQ=60.00;MQRankSum=0.000;QD=14.76;ReadPosRankSum=-1.963;SOR=0.723	GT:AD:DP:GQ:PL	0/1:81,78:159:99:2355,0,2102	4	5.52679	4.58011	0.198542	3.35329	3.35545	0
d225008	Ib	ThrRS	FBgn0027081	1	2L:12105272	0.424658	2L	12105272	C	T	CT	FALSE	73	849.6	AC=1;AF=0.500;AN=2;BaseQRankSum=-5.298;DP=73;ExcessHet=3.0103;FS=0.000;MLEAC=1;MLEAF=0.500;MQ=60.00;MQRankSum=0.000;QD=11.64;ReadPosRankSum=1.182;SOR=0.662	GT:AD:DP:GQ:PL	0/1:42,31:73:99:857,0,1351	4	5.11791	5.14664	0.914631	2.22626	2.05694	0
d225008	Ib	ThrRS	FBgn0027081	1	2L:12105826	0.475	2L	12105826	C	T	CT	FALSE	80	971.6	AC=1;AF=0.500;AN=2;BaseQRankSum=-3.193;DP=80;ExcessHet=3.0103;FS=0.000;MLEAC=1;MLEAF=0.500;MQ=60.00;MQRankSum=0.000;QD=12.15;ReadPosRankSum=-0.479;SOR=0.702	GT:AD:DP:GQ:PL	0/1:42,38:80:99:979,0,1140	4	5.11791	5.14664	0.914631	2.22626	2.05694	0
d225008	Ib	ThrRS	FBgn0027081	1	2L:12106057	0.238372	2L	12106057	T	C	TC	FALSE	172	951.6	AC=1;AF=0.500;AN=2;BaseQRankSum=6.020;DP=172;ExcessHet=3.0103;FS=3.394;MLEAC=1;MLEAF=0.500;MQ=60.00;MQRankSum=0.000;QD=5.53;ReadPosRankSum=0.285;SOR=0.431	GT:AD:DP:GQ:PL	0/1:131,41:172:99:959,0,3756	4	5.11791	5.14664	0.914631	2.22626	2.05694	0
d225008	Ib	ThrRS	FBgn0027081	1	2L:12106174	0.213592	2L	12106174	T	C	TC	FALSE	103	518.6	AC=1;AF=0.500;AN=2;BaseQRankSum=7.085;DP=103;ExcessHet=3.0103;FS=0.000;MLEAC=1;MLEAF=0.500;MQ=60.00;MQRankSum=0.000;QD=5.03;ReadPosRankSum=0.081;SOR=0.623	GT:AD:DP:GQ:PL	0/1:81,22:103:99:526,0,2247	4	5.11791	5.14664	0.914631	2.22626	2.05694	0
d225008	Ib	ThrRS	FBgn0027081	1	2L:12106306	0.23125	2L	12106306	T	C	TC	FALSE	160	1034.6	AC=1;AF=0.500;AN=2;BaseQRankSum=6.917;DP=160;ExcessHet=3.0103;FS=7.297;MLEAC=1;MLEAF=0.500;MQ=60.00;MQRankSum=0.000;QD=6.47;ReadPosRankSum=-1.257;SOR=0.608	GT:AD:DP:GQ:PL	0/1:123,37:160:99:1042,0,4338	4	5.11791	5.14664	0.914631	2.22626	2.05694	0
d225008	Ib	ThrRS	FBgn0027081	1	2L:12106330	0.2	2L	12106330	C	T	CT	FALSE	130	736.6	AC=1;AF=0.500;AN=2;BaseQRankSum=-3.413;DP=130;ExcessHet=3.0103;FS=2.900;MLEAC=1;MLEAF=0.500;MQ=60.00;MQRankSum=0.000;QD=5.67;ReadPosRankSum=0.575;SOR=0.995	GT:AD:DP:GQ:PL	0/1:104,26:130:99:744,0,3974	4	5.11791	5.14664	0.914631	2.22626	2.05694	0
d225008	Ib	SC35	FBgn0265298	-1	2L:12432324	0.6621	2L	12432324	A	G	TC	FALSE	219	5846.6	AC=1;AF=0.500;AN=2;BaseQRankSum=7.301;DP=219;ExcessHet=3.0103;FS=2.633;MLEAC=1;MLEAF=0.500;MQ=60.00;MQRankSum=0.000;QD=26.70;ReadPosRankSum=0.871;SOR=0.902	GT:AD:DP:GQ:PL	0/1:74,145:219:99:5854,0,2733	4	4.9017	4.50666	0.773754	2.86801	3.138	0
d225008	Ib	SC35	FBgn0265298	-1	2L:12432325	0.6621	2L	12432325	A	T	TA	FALSE	219	5855.6	AC=1;AF=0.500;AN=2;BaseQRankSum=-7.835;DP=219;ExcessHet=3.0103;FS=2.633;MLEAC=1;MLEAF=0.500;MQ=60.00;MQRankSum=0.000;QD=26.74;ReadPosRankSum=0.761;SOR=0.902	GT:AD:DP:GQ:PL	0/1:74,145:219:99:5863,0,2657	4	4.9017	4.50666	0.773754	2.86801	3.138	0
d225008	Ib	bun	FBgn0259176	-1	2L:12456418	0.99	2L	12456418	C	T	GA	FALSE	100	2792.03	AC=2;AF=1.00;AN=2;BaseQRankSum=-1.730;DP=100;ExcessHet=3.0103;FS=3.468;MLEAC=2;MLEAF=1.00;MQ=60.00;MQRankSum=0.000;QD=27.92;ReadPosRankSum=0.903;SOR=0.587	GT:AD:DP:GQ:PL	1/1:1,99:100:99:2806,257,0	4	6.94439	6.97053	0.809548	5.18377	5.42671	0
d225008	Ib	TfIIS	FBgn0010422	-1	2L:15059878	1	2L	15059878	C	T	GA	FALSE	66	2287.03	AC=2;AF=1.00;AN=2;DP=66;ExcessHet=3.0103;FS=0.000;MLEAC=2;MLEAF=1.00;MQ=60.00;QD=34.65;SOR=0.886	GT:AD:DP:GQ:PL	1/1:0,66:66:99:2301,199,0	4	2.54637	2.11074	0.661046	1.6688	1.56515	0
d225008	Ib	mtgo	FBgn0259735	1	2L:16603871	0.609091	2L	16603871	A	T	AT	FALSE	110	1967.6	AC=1;AF=0.500;AN=2;BaseQRankSum=-1.258;DP=110;ExcessHet=3.0103;FS=0.000;MLEAC=1;MLEAF=0.500;MQ=60.00;MQRankSum=0.000;QD=17.89;ReadPosRankSum=2.489;SOR=0.705	GT:AD:DP:GQ:PL	0/1:43,67:110:99:1975,0,1482	4	3.05458	1.49989	9.41986e-05	1.2153	1.18717	0
d225008	Ib	mtgo	FBgn0259735	1	2L:16603922	0.581395	2L	16603922	A	T	AT	FALSE	129	1883.6	AC=1;AF=0.500;AN=2;BaseQRankSum=-7.144;DP=129;ExcessHet=3.0103;FS=11.351;MLEAC=1;MLEAF=0.500;MQ=60.00;MQRankSum=0.000;QD=14.60;ReadPosRankSum=-0.450;SOR=0.390	GT:AD:DP:GQ:PL	0/1:54,75:129:99:1891,0,1462	4	3.05458	1.49989	9.41986e-05	1.2153	1.18717	0
d225008	Ib	VhaSFD	FBgn0027779	-1	2L:16723635	0.539474	2L	16723635	G	A	CT	FALSE	76	1118.6	AC=1;AF=0.500;AN=2;BaseQRankSum=-3.634;DP=76;ExcessHet=3.0103;FS=0.889;MLEAC=1;MLEAF=0.500;MQ=60.00;MQRankSum=0.000;QD=14.72;ReadPosRankSum=0.345;SOR=0.539	GT:AD:DP:GQ:PL	0/1:35,41:76:99:1126,0,1013	4	5.66391	5.20374	0.436634	3.41702	3.56526	0
d225008	Ib	VhaSFD	FBgn0027779	-1	2L:16724477	0.27957	2L	16724477	A	G	TC	FALSE	186	1244.6	AC=1;AF=0.500;AN=2;BaseQRankSum=3.799;DP=186;ExcessHet=3.0103;FS=6.105;MLEAC=1;MLEAF=0.500;MQ=60.00;MQRankSum=0.000;QD=6.69;ReadPosRankSum=-2.111;SOR=0.375	GT:AD:DP:GQ:PL	0/1:134,52:186:99:1252,0,3903	4	5.66391	5.20374	0.436634	3.41702	3.56526	0
d225008	Ib	CG42750	FBgn0261804	-1	2L:18275581	0.361446	2L	18275581	C	T	GA	FALSE	167	1314.6	AC=1;AF=0.500;AN=2;BaseQRankSum=-7.629;DP=167;ExcessHet=3.0103;FS=36.547;MLEAC=1;MLEAF=0.500;MQ=60.00;MQRankSum=0.000;QD=7.92;ReadPosRankSum=-0.345;SOR=3.031	GT:AD:DP:GQ:PL	0/1:106,60:166:99:1322,0,3246	4	2.0103	0.971178	0.413677	0.0131953	0.0278896	0
d225008	Ib	CG42750	FBgn0261804	-1	2L:18275609	0.354839	2L	18275609	C	A	GT	FALSE	155	1201.6	AC=1;AF=0.500;AN=2;BaseQRankSum=-4.302;DP=155;ExcessHet=3.0103;FS=16.030;MLEAC=1;MLEAF=0.500;MQ=60.00;MQRankSum=0.000;QD=7.75;ReadPosRankSum=-0.729;SOR=1.773	GT:AD:DP:GQ:PL	0/1:100,55:155:99:1209,0,3858	4	2.0103	0.971178	0.413677	0.0131953	0.0278896	0
d225008	Ib	ref(2)P	FBgn0003231	1	2L:19545431	1	2L	19545431	C	A	CA	FALSE	65	2101.03	AC=2;AF=1.00;AN=2;DP=65;ExcessHet=3.0103;FS=0.000;MLEAC=2;MLEAF=1.00;MQ=60.00;QD=32.32;SOR=5.518	GT:AD:DP:GQ:PL	1/1:0,65:65:99:2115,195,0	4	4.50617	5.57657	0.054498	3.77421	3.62158	0
d225008	Ib	COX4	FBgn0032833	1	2L:19959779	0.639004	2L	19959779	T	C	TC	FALSE	241	4779.6	AC=1;AF=0.500;AN=2;BaseQRankSum=9.924;DP=241;ExcessHet=3.0103;FS=10.137;MLEAC=1;MLEAF=0.500;MQ=60.00;MQRankSum=0.000;QD=19.83;ReadPosRankSum=-0.927;SOR=0.331	GT:AD:DP:GQ:PL	0/1:87,154:241:99:4787,0,2022	4	9.81625	9.53537	0.832239	8.74932	8.98623	0
d225008	Ib	twit	FBgn0032895	1	2L:20856280	0.507055	2L	20856280	A	T	AT	FALSE	1134	15666.6	AC=1;AF=0.500;AN=2;BaseQRankSum=0.649;DP=1134;ExcessHet=3.0103;FS=1.101;MLEAC=1;MLEAF=0.500;MQ=60.00;MQRankSum=0.000;QD=13.82;ReadPosRankSum=0.796;SOR=0.581	GT:AD:DP:GQ:PL	0/1:559,575:1134:99:15674,0,14731	4	8.61265	7.85783	0.400253	0.434844	0.167292	0
d225008	Ib	twit	FBgn0032895	1	2L:20856551	0.527962	2L	20856551	C	T	CT	FALSE	1055	14507.6	AC=1;AF=0.500;AN=2;BaseQRankSum=-18.282;DP=1055;ExcessHet=3.0103;FS=0.528;MLEAC=1;MLEAF=0.500;MQ=60.00;MQRankSum=0.000;QD=13.75;ReadPosRankSum=-2.870;SOR=0.761	GT:AD:DP:GQ:PL	0/1:498,557:1055:99:14515,0,14674	4	8.61265	7.85783	0.400253	0.434844	0.167292	0
d225008	Ib	nrv3	FBgn0032946	1	2L:21392675	0.52	2L	21392675	G	A	GA	FALSE	50	768.6	AC=1;AF=0.500;AN=2;BaseQRankSum=-4.178;DP=50;ExcessHet=3.0103;FS=2.204;MLEAC=1;MLEAF=0.500;MQ=60.00;MQRankSum=0.000;QD=15.37;ReadPosRankSum=0.677;SOR=1.355	GT:AD:DP:GQ:PL	0/1:24,26:50:99:776,0,899	4	9.98583	9.36114	0.242839	0.270495	0.683618	0
d225008	Ib	RpL21	FBgn0032987	-1	2L:22247554	0.196673	2L	22247554	C	A	GT	FALSE	1043	3478.6	AC=1;AF=0.500;AN=2;BaseQRankSum=-10.545;DP=1043;ExcessHet=3.0103;FS=0.000;MLEAC=1;MLEAF=0.500;MQ=60.00;MQRankSum=0.000;QD=3.40;ReadPosRankSum=2.626;SOR=0.612	GT:AD:DP:GQ:PL	0/1:821,201:1022:99:3486,0,24731	4	11.9931	12.274	2.30553e-06	11.7319	11.5755	0
d225008	Ib	Snx21	FBgn0031457	-1	2L:2764369	1	2L	2764369	C	T	GA	FALSE	33	1831.03	AC=2;AF=1.00;AN=2;DP=33;ExcessHet=3.0103;FS=0.000;MLEAC=2;MLEAF=1.00;MQ=60.00;QD=32.56;SOR=7.054	GT:AD:DP:GQ:PL	1/1:0,33:33:99:1845,123,0	4	3.71689	5.92923	0.00165457	2.46603	2.37167	0
d225008	Ib	Snx21	FBgn0031457	-1	2L:2764378	1	2L	2764378	G	A	CT	FALSE	28	1336.03	AC=2;AF=1.00;AN=2;DP=28;ExcessHet=3.0103;FS=0.000;MLEAC=2;MLEAF=1.00;MQ=60.00;QD=28.11;SOR=6.736	GT:AD:DP:GQ:PL	1/1:0,28:28:90:1350,90,0	4	3.71689	5.92923	0.00165457	2.46603	2.37167	0
d225008	Ib	CG9662	FBgn0031529	-1	2L:3376197	1	2L	3376197	G	A	CT	FALSE	44	1460.03	AC=2;AF=1.00;AN=2;DP=44;ExcessHet=3.0103;FS=0.000;MLEAC=2;MLEAF=1.00;MQ=60.00;QD=33.18;SOR=0.784	GT:AD:DP:GQ:PL	1/1:0,44:44:99:1474,132,0	4	4.79971	4.26303	0.58721	2.25071	2.37554	0
d225008	Ib	CG9662	FBgn0031529	-1	2L:3376230	1	2L	3376230	C	G	GC	FALSE	38	1484.03	AC=2;AF=1.00;AN=2;DP=38;ExcessHet=3.0103;FS=0.000;MLEAC=2;MLEAF=1.00;MQ=60.00;QD=28.00;SOR=0.693	GT:AD:DP:GQ:PL	1/1:0,38:38:99:1498,113,0	4	4.79971	4.26303	0.58721	2.25071	2.37554	0
d225008	Ib	CG9662	FBgn0031529	-1	2L:3376254	1	2L	3376254	A	G	TC	FALSE	43	1995.03	AC=2;AF=1.00;AN=2;DP=43;ExcessHet=3.0103;FS=0.000;MLEAC=2;MLEAF=1.00;MQ=60.00;QD=29.23;SOR=1.455	GT:AD:DP:GQ:PL	1/1:0,43:43:99:2009,135,0	4	4.79971	4.26303	0.58721	2.25071	2.37554	0
d225008	Ib	CG3702	FBgn0031590	-1	2L:4224992	1	2L	4224992	C	T	GA	FALSE	35	1203.03	AC=2;AF=1.00;AN=2;DP=35;ExcessHet=3.0103;FS=0.000;MLEAC=2;MLEAF=1.00;MQ=60.00;QD=34.37;SOR=1.308	GT:AD:DP:GQ:PL	1/1:0,35:35:99:1217,111,0	4	2.65173	2.86415	0.942284	2.07609	2.03603	0
d225008	Ib	RpL40	FBgn0003941	1	2L:4228231	0.437186	2L	4228231	G	A	GA	FALSE	1194	13456.6	AC=1;AF=0.500;AN=2;BaseQRankSum=-18.797;DP=1194;ExcessHet=3.0103;FS=1.113;MLEAC=1;MLEAF=0.500;MQ=60.00;MQRankSum=0.000;QD=11.27;ReadPosRankSum=-2.610;SOR=0.829	GT:AD:DP:GQ:PL	0/1:672,522:1194:99:13464,0,20178	4	12.1664	12.1374	0.69258	11.4574	11.4142	0
d225008	Ib	fipi	FBgn0031627	-1	2L:4735074	0.530864	2L	4735074	A	T	TA	FALSE	81	1585.6	AC=1;AF=0.500;AN=2;BaseQRankSum=4.941;DP=81;ExcessHet=3.0103;FS=2.994;MLEAC=1;MLEAF=0.500;MQ=60.00;MQRankSum=0.000;QD=19.58;ReadPosRankSum=-0.085;SOR=0.434	GT:AD:DP:GQ:PL	0/1:38,43:81:99:1593,0,1525	4	5.70931	5.32823	0.250204	0.307762	0.421432	0
d225008	Ib	fipi	FBgn0031627	-1	2L:4735376	0.561644	2L	4735376	G	A	CT	FALSE	73	1102.6	AC=1;AF=0.500;AN=2;BaseQRankSum=-3.242;DP=73;ExcessHet=3.0103;FS=4.625;MLEAC=1;MLEAF=0.500;MQ=60.00;MQRankSum=0.000;QD=15.10;ReadPosRankSum=-0.881;SOR=0.332	GT:AD:DP:GQ:PL	0/1:32,41:73:99:1110,0,929	4	5.70931	5.32823	0.250204	0.307762	0.421432	0
d225008	Ib	fipi	FBgn0031627	-1	2L:4738435	0.72549	2L	4738435	G	A	CT	FALSE	153	3369.6	AC=1;AF=0.500;AN=2;BaseQRankSum=-0.102;DP=153;ExcessHet=3.0103;FS=0.703;MLEAC=1;MLEAF=0.500;MQ=60.00;MQRankSum=0.000;QD=22.02;ReadPosRankSum=-0.641;SOR=0.602	GT:AD:DP:GQ:PL	0/1:42,111:153:99:3377,0,957	4	5.70931	5.32823	0.250204	0.307762	0.421432	0
d225008	Ib	Rtnl1	FBgn0053113	-1	2L:5008290	0.622222	2L	5008290	G	T	CA	FALSE	45	767.6	AC=1;AF=0.500;AN=2;BaseQRankSum=-4.370;DP=45;ExcessHet=3.0103;FS=11.838;MLEAC=1;MLEAF=0.500;MQ=60.00;MQRankSum=0.000;QD=17.06;ReadPosRankSum=0.494;SOR=0.360	GT:AD:DP:GQ:PL	0/1:17,28:45:99:775,0,464	4	8.65754	8.22041	0.738348	6.20784	5.95089	0
d225008	Ib	Rtnl1	FBgn0053113	-1	2L:5009310	0.684211	2L	5009310	C	T	GA	FALSE	57	1411.6	AC=1;AF=0.500;AN=2;BaseQRankSum=-3.288;DP=57;ExcessHet=3.0103;FS=0.000;MLEAC=1;MLEAF=0.500;MQ=60.00;MQRankSum=0.000;QD=24.76;ReadPosRankSum=-0.009;SOR=0.848	GT:AD:DP:GQ:PL	0/1:18,39:57:99:1419,0,662	4	8.65754	8.22041	0.738348	6.20784	5.95089	0
d225008	Ib	SelT	FBgn0031670	1	2L:5011196	0.475248	2L	5011196	A	C	AC	FALSE	303	4051.6	AC=1;AF=0.500;AN=2;BaseQRankSum=4.766;DP=303;ExcessHet=3.0103;FS=0.421;MLEAC=1;MLEAF=0.500;MQ=60.00;MQRankSum=0.000;QD=13.37;ReadPosRankSum=-1.075;SOR=0.656	GT:AD:DP:GQ:PL	0/1:159,144:303:99:4059,0,5062	4	6.33383	6.84417	0.699678	5.28965	5.24848	0
d225008	Ib	RpS13	FBgn0010265	-1	2L:8363699	0.636364	2L	8363699	G	T	CA	FALSE	23	285.6	AC=1;AF=0.500;AN=2;BaseQRankSum=-3.402;DP=23;ExcessHet=3.0103;FS=0.000;MLEAC=1;MLEAF=0.500;MQ=60.00;MQRankSum=0.000;QD=12.98;ReadPosRankSum=3.099;SOR=0.473	GT:AD:DP:GQ:PL	0/1:8,14:22:99:293,0,242	4	12.5537	12.6411	0.256312	12.0036	11.9644	0
d225008	Ib	RpS13	FBgn0010265	-1	2L:8363926	0.391904	2L	8363926	C	A	GT	FALSE	1162	11383.6	AC=1;AF=0.500;AN=2;BaseQRankSum=-19.574;DP=1162;ExcessHet=3.0103;FS=1.217;MLEAC=1;MLEAF=0.500;MQ=60.00;MQRankSum=0.000;QD=9.80;ReadPosRankSum=1.052;SOR=0.794	GT:AD:DP:GQ:PL	0/1:706,455:1161:99:11391,0,21329	4	12.5537	12.6411	0.256312	12.0036	11.9644	0
d225008	Ib	CG13384	FBgn0032036	1	2L:8386605	1	2L	8386605	C	T	CT	FALSE	15	480.03	AC=2;AF=1.00;AN=2;DP=15;ExcessHet=3.0103;FS=0.000;MLEAC=2;MLEAF=1.00;MQ=60.00;QD=32.00;SOR=0.818	GT:AD:DP:GQ:PL	1/1:0,15:15:45:494,45,0	4	2.93885	3.45893	0.519469	1.35427	1.30628	0
d225008	Ib	CG13384	FBgn0032036	1	2L:8386629	1	2L	8386629	A	T	AT	FALSE	17	706.03	AC=2;AF=1.00;AN=2;DP=17;ExcessHet=3.0103;FS=0.000;MLEAC=2;MLEAF=1.00;MQ=60.00;QD=26.76;SOR=0.804	GT:AD:DP:GQ:PL	1/1:0,17:17:51:720,51,0	4	2.93885	3.45893	0.519469	1.35427	1.30628	0
d225008	Ib	CG13384	FBgn0032036	1	2L:8386890	1	2L	8386890	C	T	CT	FALSE	19	637.03	AC=2;AF=1.00;AN=2;DP=19;ExcessHet=3.0103;FS=0.000;MLEAC=2;MLEAF=1.00;MQ=60.00;QD=33.53;SOR=1.609	GT:AD:DP:GQ:PL	1/1:0,19:19:57:651,57,0	4	2.93885	3.45893	0.519469	1.35427	1.30628	0
d225008	Ib	Gdi	FBgn0004868	-1	2L:9494388	0.527736	2L	9494388	G	A	CT	FALSE	667	9455.6	AC=1;AF=0.500;AN=2;BaseQRankSum=-10.502;DP=667;ExcessHet=3.0103;FS=0.000;MLEAC=1;MLEAF=0.500;MQ=60.00;MQRankSum=0.000;QD=14.18;ReadPosRankSum=3.346;SOR=0.701	GT:AD:DP:GQ:PL	0/1:315,352:667:99:9463,0,8977	4	8.05437	8.41484	0.842776	4.8483	4.88893	0
d225008	Ib	Nckx30C	FBgn0028704	-1	2L:9716129	1	2L	9716129	T	A	AT	FALSE	17	554.03	AC=2;AF=1.00;AN=2;DP=17;ExcessHet=3.0103;FS=0.000;MLEAC=2;MLEAF=1.00;MQ=60.00;QD=32.59;SOR=5.784	GT:AD:DP:GQ:PL	1/1:0,17:17:51:568,51,0	4	4.99389	4.09503	0.0412382	0.0832012	0.108464	0
d225008	Ib	Galphao	FBgn0001122	1	2R:10462557	1	2R	10462557	G	C	GC	FALSE	54	1896.03	AC=2;AF=1.00;AN=2;DP=54;ExcessHet=3.0103;FS=0.000;MLEAC=2;MLEAF=1.00;MQ=60.00;QD=25.84;SOR=3.342	GT:AD:DP:GQ:PL	1/1:0,54:54:99:1910,162,0	4	5.27539	5.64569	0.388493	0.648983	0.676221	0
d225008	Ib	Galphao	FBgn0001122	1	2R:10463844	0.180451	2R	10463844	G	A	GA	FALSE	133	279.6	AC=1;AF=0.500;AN=2;BaseQRankSum=-5.466;DP=133;ExcessHet=3.0103;FS=9.775;MLEAC=1;MLEAF=0.500;MQ=60.00;MQRankSum=0.000;QD=2.10;ReadPosRankSum=0.528;SOR=0.207	GT:AD:DP:GQ:PL	0/1:109,24:133:99:287,0,3346	4	5.27539	5.64569	0.388493	0.648983	0.676221	0
d225008	Ib	Pef	FBgn0033529	1	2R:10481675	0.521739	2R	10481675	T	G	TG	FALSE	207	3972.6	AC=1;AF=0.500;AN=2;BaseQRankSum=5.802;DP=207;ExcessHet=3.0103;FS=16.376;MLEAC=1;MLEAF=0.500;MQ=60.00;MQRankSum=0.000;QD=19.19;ReadPosRankSum=-0.507;SOR=0.220	GT:AD:DP:GQ:PL	0/1:99,108:207:99:3980,0,3819	4	6.16521	6.2731	0.743747	3.74954	3.7186	0
d225008	Ib	Pef	FBgn0033529	1	2R:10481682	0.494845	2R	10481682	A	T	AT	FALSE	194	3790.6	AC=1;AF=0.500;AN=2;BaseQRankSum=3.085;DP=194;ExcessHet=3.0103;FS=14.419;MLEAC=1;MLEAF=0.500;MQ=60.00;MQRankSum=0.000;QD=19.54;ReadPosRankSum=0.510;SOR=0.223	GT:AD:DP:GQ:PL	0/1:98,96:194:99:3798,0,3762	4	6.16521	6.2731	0.743747	3.74954	3.7186	0
d225008	Ib	RpS15Ab	FBgn0033555	1	2R:10821796	0.139535	2R	10821796	G	T	GT	FALSE	86	41.6	AC=1;AF=0.500;AN=2;BaseQRankSum=-4.447;DP=86;ExcessHet=3.0103;FS=4.785;MLEAC=1;MLEAF=0.500;MQ=60.00;MQRankSum=0.000;QD=0.48;ReadPosRankSum=2.532;SOR=1.442	GT:AD:DP:GQ:PL	0/1:74,12:86:49:49,0,2282	4	3.76529	3.1313	0.134754	5.69163	5.75158	0
d225008	Ib	RpS15Ab	FBgn0033555	1	2R:10822076	0.131579	2R	10822076	G	A	GA	FALSE	114	122.6	AC=1;AF=0.500;AN=2;BaseQRankSum=-3.506;DP=114;ExcessHet=3.0103;FS=7.824;MLEAC=1;MLEAF=0.500;MQ=60.00;MQRankSum=0.000;QD=1.08;ReadPosRankSum=-0.160;SOR=0.436	GT:AD:DP:GQ:PL	0/1:99,15:114:99:130,0,3106	4	3.76529	3.1313	0.134754	5.69163	5.75158	0
d225008	Ib	RpS15Ab	FBgn0033555	1	2R:10822209	0.168831	2R	10822209	C	A	CA	FALSE	77	297.6	AC=1;AF=0.500;AN=2;BaseQRankSum=-2.443;DP=77;ExcessHet=3.0103;FS=25.001;MLEAC=1;MLEAF=0.500;MQ=60.00;MQRankSum=0.000;QD=3.86;ReadPosRankSum=-0.416;SOR=2.048	GT:AD:DP:GQ:PL	0/1:64,13:77:99:305,0,3637	4	3.76529	3.1313	0.134754	5.69163	5.75158	0
d225008	Ib	otk2	FBgn0267728	-1	2R:12025180	1	2R	12025180	G	T	CA	FALSE	108	3462.03	AC=2;AF=1.00;AN=2;DP=108;ExcessHet=3.0103;FS=0.000;MLEAC=2;MLEAF=1.00;MQ=60.00;QD=32.06;SOR=2.628	GT:AD:DP:GQ:PL	1/1:0,108:108:99:3476,323,0	4	2.31745	2.44148	0.559353	0.202437	0.238081	0
d225008	Ib	jeb	FBgn0086677	-1	2R:12118474	0.327731	2R	12118474	C	A	GT	FALSE	119	1005.6	AC=1;AF=0.500;AN=2;BaseQRankSum=-6.264;DP=119;ExcessHet=3.0103;FS=94.945;MLEAC=1;MLEAF=0.500;MQ=60.00;MQRankSum=0.000;QD=8.45;ReadPosRankSum=-2.484;SOR=7.378	GT:AD:DP:GQ:PL	0/1:80,39:119:99:1013,0,2604	4	4.87341	5.32214	0.385496	0.119355	0.0661321	0
d225008	Ib	jeb	FBgn0086677	-1	2R:12118534	0.435622	2R	12118534	T	A	AT	FALSE	466	7585.6	AC=1;AF=0.500;AN=2;BaseQRankSum=-1.085;DP=466;ExcessHet=3.0103;FS=7.087;MLEAC=1;MLEAF=0.500;MQ=60.00;MQRankSum=0.000;QD=16.28;ReadPosRankSum=2.239;SOR=1.277	GT:AD:DP:GQ:PL	0/1:263,203:466:99:7593,0,10242	4	4.87341	5.32214	0.385496	0.119355	0.0661321	0
d225008	Ib	jeb	FBgn0086677	-1	2R:12118535	0.43319	2R	12118535	A	T	TA	FALSE	464	7620.6	AC=1;AF=0.500;AN=2;BaseQRankSum=9.048;DP=464;ExcessHet=3.0103;FS=7.046;MLEAC=1;MLEAF=0.500;MQ=60.00;MQRankSum=0.000;QD=16.42;ReadPosRankSum=2.376;SOR=1.260	GT:AD:DP:GQ:PL	0/1:263,201:464:99:7628,0,10239	4	4.87341	5.32214	0.385496	0.119355	0.0661321	0
d225008	Ib	jeb	FBgn0086677	-1	2R:12118732	0.465753	2R	12118732	G	A	CT	FALSE	585	6989.6	AC=1;AF=0.500;AN=2;BaseQRankSum=-14.037;DP=585;ExcessHet=3.0103;FS=4.986;MLEAC=1;MLEAF=0.500;MQ=60.00;MQRankSum=0.000;QD=11.97;ReadPosRankSum=0.141;SOR=1.041	GT:AD:DP:GQ:PL	0/1:312,272:584:99:6997,0,9425	4	4.87341	5.32214	0.385496	0.119355	0.0661321	0
d225008	Ib	RpS11	FBgn0033699	-1	2R:12200182	0.629508	2R	12200182	A	G	TC	FALSE	916	18125.6	AC=1;AF=0.500;AN=2;BaseQRankSum=17.982;DP=916;ExcessHet=3.0103;FS=0.000;MLEAC=1;MLEAF=0.500;MQ=60.00;MQRankSum=0.000;QD=19.81;ReadPosRankSum=0.431;SOR=0.700	GT:AD:DP:GQ:PL	0/1:339,576:915:99:18133,0,7565	4	11.6992	11.5734	0.0283431	11.6744	11.5512	0
d225008	Ib	Galphaq	FBgn0004435	1	2R:12613775	0.384127	2R	12613775	A	T	AT	FALSE	315	3034.6	AC=1;AF=0.500;AN=2;BaseQRankSum=6.589;DP=315;ExcessHet=3.0103;FS=18.948;MLEAC=1;MLEAF=0.500;MQ=60.00;MQRankSum=0.000;QD=9.63;ReadPosRankSum=0.318;SOR=0.260	GT:AD:DP:GQ:PL	0/1:194,121:315:99:3042,0,4918	4	4.30852	4.11752	0.995742	1.74037	1.60284	0
d225008	Ib	Galphaq	FBgn0004435	1	2R:12613986	0.541401	2R	12613986	C	T	CT	FALSE	157	2427.6	AC=1;AF=0.500;AN=2;BaseQRankSum=0.947;DP=157;ExcessHet=3.0103;FS=12.978;MLEAC=1;MLEAF=0.500;MQ=60.00;MQRankSum=0.000;QD=15.46;ReadPosRankSum=1.537;SOR=0.235	GT:AD:DP:GQ:PL	0/1:72,85:157:99:2435,0,1866	4	4.30852	4.11752	0.995742	1.74037	1.60284	0
d225008	Ib	bbc	FBgn0033844	-1	2R:13486963	1	2R	13486963	G	C	CG	FALSE	94	3142.03	AC=2;AF=1.00;AN=2;DP=94;ExcessHet=3.0103;FS=0.000;MLEAC=2;MLEAF=1.00;MQ=60.00;QD=33.43;SOR=1.536	GT:AD:DP:GQ:PL	1/1:0,94:94:99:3156,280,0	4	2.43079	2.35712	0.725008	1.06293	1.18129	0
d225008	Ib	bbc	FBgn0033844	-1	2R:13487350	1	2R	13487350	C	T	GA	FALSE	90	3658.03	AC=2;AF=1.00;AN=2;DP=90;ExcessHet=3.0103;FS=0.000;MLEAC=2;MLEAF=1.00;MQ=60.00;QD=32.91;SOR=1.046	GT:AD:DP:GQ:PL	1/1:0,90:90:99:3672,270,0	4	2.43079	2.35712	0.725008	1.06293	1.18129	0
d225008	Ib	CG6329	FBgn0033872	1	2R:13829759	0.623318	2R	13829759	G	T	GT	FALSE	446	8000.6	AC=1;AF=0.500;AN=2;BaseQRankSum=-9.456;DP=446;ExcessHet=3.0103;FS=1.165;MLEAC=1;MLEAF=0.500;MQ=60.00;MQRankSum=0.000;QD=17.94;ReadPosRankSum=0.491;SOR=0.586	GT:AD:DP:GQ:PL	0/1:168,278:446:99:8008,0,4623	4	6.30782	5.19838	0.0246684	0.326178	0.229277	0
d225008	Ib	CG6329	FBgn0033872	1	2R:13830968	0.57277	2R	13830968	A	C	AC	FALSE	426	7427.6	AC=1;AF=0.500;AN=2;BaseQRankSum=10.444;DP=426;ExcessHet=3.0103;FS=4.182;MLEAC=1;MLEAF=0.500;MQ=60.00;MQRankSum=0.000;QD=17.44;ReadPosRankSum=0.018;SOR=0.460	GT:AD:DP:GQ:PL	0/1:182,244:426:99:7435,0,4851	4	6.30782	5.19838	0.0246684	0.326178	0.229277	0
d225008	Ib	CG6329	FBgn0033872	1	2R:13831452	0.486034	2R	13831452	T	C	TC	FALSE	179	2455.6	AC=1;AF=0.500;AN=2;BaseQRankSum=5.271;DP=179;ExcessHet=3.0103;FS=1.172;MLEAC=1;MLEAF=0.500;MQ=60.00;MQRankSum=0.000;QD=13.72;ReadPosRankSum=0.052;SOR=0.824	GT:AD:DP:GQ:PL	0/1:92,87:179:99:2463,0,2562	4	6.30782	5.19838	0.0246684	0.326178	0.229277	0
d225008	Ib	CG6329	FBgn0033872	1	2R:13831486	0.538012	2R	13831486	C	A	CA	FALSE	171	2560.6	AC=1;AF=0.500;AN=2;BaseQRankSum=-6.860;DP=171;ExcessHet=3.0103;FS=0.633;MLEAC=1;MLEAF=0.500;MQ=60.00;MQRankSum=0.000;QD=14.97;ReadPosRankSum=-1.466;SOR=0.619	GT:AD:DP:GQ:PL	0/1:79,92:171:99:2568,0,2189	4	6.30782	5.19838	0.0246684	0.326178	0.229277	0
d225008	Ib	CG6329	FBgn0033872	1	2R:13831556	0.552486	2R	13831556	C	G	CG	FALSE	181	3778.6	AC=1;AF=0.500;AN=2;BaseQRankSum=4.523;DP=181;ExcessHet=3.0103;FS=0.000;MLEAC=1;MLEAF=0.500;MQ=60.00;MQRankSum=0.000;QD=20.88;ReadPosRankSum=-0.205;SOR=0.656	GT:AD:DP:GQ:PL	0/1:81,100:181:99:3786,0,2600	4	6.30782	5.19838	0.0246684	0.326178	0.229277	0
d225008	Ib	CG6329	FBgn0033872	1	2R:13831585	0.517949	2R	13831585	T	C	TC	FALSE	196	2968.6	AC=1;AF=0.500;AN=2;BaseQRankSum=7.712;DP=196;ExcessHet=3.0103;FS=1.108;MLEAC=1;MLEAF=0.500;MQ=60.00;MQRankSum=0.000;QD=15.22;ReadPosRankSum=1.359;SOR=0.634	GT:AD:DP:GQ:PL	0/1:94,101:195:99:2976,0,2899	4	6.30782	5.19838	0.0246684	0.326178	0.229277	0
d225008	Ib	CG6329	FBgn0033872	1	2R:13832058	0.624625	2R	13832058	A	T	AT	FALSE	333	8420.6	AC=1;AF=0.500;AN=2;BaseQRankSum=-8.524;DP=333;ExcessHet=3.0103;FS=5.359;MLEAC=1;MLEAF=0.500;MQ=60.00;MQRankSum=0.000;QD=25.29;ReadPosRankSum=-4.895;SOR=0.467	GT:AD:DP:GQ:PL	0/1:125,208:333:99:8428,0,4596	4	6.30782	5.19838	0.0246684	0.326178	0.229277	0
d225008	Ib	CG6329	FBgn0033872	1	2R:13832088	0.593985	2R	13832088	C	T	CT	FALSE	266	4510.6	AC=1;AF=0.500;AN=2;BaseQRankSum=-8.628;DP=266;ExcessHet=3.0103;FS=13.829;MLEAC=1;MLEAF=0.500;MQ=60.00;MQRankSum=0.000;QD=16.96;ReadPosRankSum=3.371;SOR=0.290	GT:AD:DP:GQ:PL	0/1:108,158:266:99:4518,0,3008	4	6.30782	5.19838	0.0246684	0.326178	0.229277	0
d225008	Ib	CG6329	FBgn0033872	1	2R:13832486	0.330128	2R	13832486	G	A	GA	FALSE	313	2348.6	AC=1;AF=0.500;AN=2;BaseQRankSum=-8.800;DP=313;ExcessHet=3.0103;FS=14.018;MLEAC=1;MLEAF=0.500;MQ=60.00;MQRankSum=0.000;QD=7.53;ReadPosRankSum=0.213;SOR=1.319	GT:AD:DP:GQ:PL	0/1:209,103:312:99:2356,0,6461	4	6.30782	5.19838	0.0246684	0.326178	0.229277	0
d225008	Ib	CG6329	FBgn0033872	1	2R:13833096	0.423077	2R	13833096	T	G	TG	FALSE	26	395.6	AC=1;AF=0.500;AN=2;BaseQRankSum=0.587;DP=26;ExcessHet=3.0103;FS=7.715;MLEAC=1;MLEAF=0.500;MQ=60.00;MQRankSum=0.000;QD=15.22;ReadPosRankSum=-0.991;SOR=0.042	GT:AD:DP:GQ:PL	0/1:15,11:26:99:403,0,1732	4	6.30782	5.19838	0.0246684	0.326178	0.229277	0
d225008	Ib	shot	FBgn0013733	-1	2R:13884557	1	2R	13884557	A	G	TC	FALSE	103	3630.03	AC=2;AF=1.00;AN=2;DP=103;ExcessHet=3.0103;FS=0.000;MLEAC=2;MLEAF=1.00;MQ=60.00;QD=26.36;SOR=0.925	GT:AD:DP:GQ:PL	1/1:0,103:103:99:3644,308,0	4	3.15927	3.81751	0.00164051	1.26596	1.43746	0
d225008	Ib	shot	FBgn0013733	-1	2R:13884851	1	2R	13884851	G	A	CT	FALSE	115	3696.03	AC=2;AF=1.00;AN=2;DP=115;ExcessHet=3.0103;FS=0.000;MLEAC=2;MLEAF=1.00;MQ=60.00;QD=32.14;SOR=1.609	GT:AD:DP:GQ:PL	1/1:0,115:115:99:3710,344,0	4	3.15927	3.81751	0.00164051	1.26596	1.43746	0
d225008	Ib	shot	FBgn0013733	-1	2R:13885220	1	2R	13885220	C	T	GA	FALSE	27	916.03	AC=2;AF=1.00;AN=2;DP=27;ExcessHet=3.0103;FS=0.000;MLEAC=2;MLEAF=1.00;MQ=60.00;QD=33.93;SOR=0.922	GT:AD:DP:GQ:PL	1/1:0,27:27:81:930,81,0	4	3.15927	3.81751	0.00164051	1.26596	1.43746	0
d225008	Ib	shot	FBgn0013733	-1	2R:13885256	1	2R	13885256	G	A	CT	FALSE	24	743.03	AC=2;AF=1.00;AN=2;DP=24;ExcessHet=3.0103;FS=0.000;MLEAC=2;MLEAF=1.00;MQ=60.00;QD=30.96;SOR=1.519	GT:AD:DP:GQ:PL	1/1:0,24:24:71:757,71,0	4	3.15927	3.81751	0.00164051	1.26596	1.43746	0
d225008	Ib	shot	FBgn0013733	-1	2R:13885268	1	2R	13885268	A	G	TC	FALSE	23	1021.03	AC=2;AF=1.00;AN=2;DP=23;ExcessHet=3.0103;FS=0.000;MLEAC=2;MLEAF=1.00;MQ=60.00;QD=27.47;SOR=2.400	GT:AD:DP:GQ:PL	1/1:0,23:23:69:1035,69,0	4	3.15927	3.81751	0.00164051	1.26596	1.43746	0
d225008	Ib	shot	FBgn0013733	-1	2R:13885271	1	2R	13885271	C	G	GC	FALSE	23	1021.03	AC=2;AF=1.00;AN=2;DP=23;ExcessHet=3.0103;FS=0.000;MLEAC=2;MLEAF=1.00;MQ=60.00;QD=30.82;SOR=2.400	GT:AD:DP:GQ:PL	1/1:0,23:23:69:1035,69,0	4	3.15927	3.81751	0.00164051	1.26596	1.43746	0
d225008	Ib	shot	FBgn0013733	-1	2R:13885323	1	2R	13885323	A	C	TG	FALSE	13	438.02	AC=2;AF=1.00;AN=2;DP=13;ExcessHet=3.0103;FS=0.000;MLEAC=2;MLEAF=1.00;MQ=60.00;QD=33.69;SOR=1.179	GT:AD:DP:GQ:PL	1/1:0,13:13:39:452,39,0	4	3.15927	3.81751	0.00164051	1.26596	1.43746	0
d225008	Ib	shot	FBgn0013733	-1	2R:13885607	1	2R	13885607	A	G	TC	FALSE	51	1850.03	AC=2;AF=1.00;AN=2;DP=51;ExcessHet=3.0103;FS=0.000;MLEAC=2;MLEAF=1.00;MQ=60.00;QD=27.86;SOR=2.970	GT:AD:DP:GQ:PL	1/1:0,51:51:99:1864,153,0	4	3.15927	3.81751	0.00164051	1.26596	1.43746	0
d225008	Ib	shot	FBgn0013733	-1	2R:13885702	1	2R	13885702	G	A	CT	FALSE	195	8864.03	AC=2;AF=1.00;AN=2;DP=195;ExcessHet=3.0103;FS=0.000;MLEAC=2;MLEAF=1.00;MQ=60.00;QD=29.29;SOR=1.671	GT:AD:DP:GQ:PL	1/1:0,195:195:99:8878,617,0	4	3.15927	3.81751	0.00164051	1.26596	1.43746	0
d225008	Ib	shot	FBgn0013733	-1	2R:13885706	1	2R	13885706	T	A	AT	FALSE	191	8840.03	AC=2;AF=1.00;AN=2;DP=191;ExcessHet=3.0103;FS=0.000;MLEAC=2;MLEAF=1.00;MQ=60.00;QD=27.14;SOR=1.622	GT:AD:DP:GQ:PL	1/1:0,191:191:99:8854,614,0	4	3.15927	3.81751	0.00164051	1.26596	1.43746	0
d225008	Ib	shot	FBgn0013733	-1	2R:13886075	1	2R	13886075	G	A	CT	FALSE	231	7613.03	AC=2;AF=1.00;AN=2;DP=231;ExcessHet=3.0103;FS=0.000;MLEAC=2;MLEAF=1.00;MQ=60.00;QD=32.96;SOR=1.312	GT:AD:DP:GQ:PL	1/1:0,231:231:99:7627,693,0	4	3.15927	3.81751	0.00164051	1.26596	1.43746	0
d225008	Ib	eIF3m	FBgn0033902	-1	2R:14163780	1	2R	14163780	C	G	GC	FALSE	129	4250.03	AC=2;AF=1.00;AN=2;DP=129;ExcessHet=3.0103;FS=0.000;MLEAC=2;MLEAF=1.00;MQ=60.00;QD=33.46;SOR=0.879	GT:AD:DP:GQ:PL	1/1:0,127:127:99:4264,378,0	4	6.59068	6.83618	0.93599	5.76981	5.6464	0
d225008	Ib	ReepB	FBgn0033906	1	2R:14172328	0.41502	2R	14172328	T	G	TG	FALSE	253	2910.6	AC=1;AF=0.500;AN=2;BaseQRankSum=10.421;DP=253;ExcessHet=3.0103;FS=0.000;MLEAC=1;MLEAF=0.500;MQ=60.00;MQRankSum=0.000;QD=11.50;ReadPosRankSum=1.822;SOR=0.680	GT:AD:DP:GQ:PL	0/1:148,105:253:99:2918,0,4141	4	8.82339	8.47452	0.973655	7.40431	7.35215	0
d225008	Ib	ReepB	FBgn0033906	1	2R:14172453	0.433803	2R	14172453	A	C	AC	FALSE	371	4441.64	AC=1;AF=0.500;AN=2;BaseQRankSum=8.906;DP=371;ExcessHet=3.0103;FS=0.000;MLEAC=1;MLEAF=0.500;MQ=60.00;MQRankSum=0.000;QD=12.51;ReadPosRankSum=-1.033;SOR=0.713	GT:AD:DP:GQ:PL	0/1:201,154:355:99:4449,0,5855	4	8.82339	8.47452	0.973655	7.40431	7.35215	0
d225008	Ib	Ih	FBgn0263397	1	2R:14276241	0.934783	2R	14276241	G	C	GC	FALSE	46	1762.6	AC=1;AF=0.500;AN=2;BaseQRankSum=-0.176;DP=46;ExcessHet=3.0103;FS=2.656;MLEAC=1;MLEAF=0.500;MQ=60.00;MQRankSum=0.000;QD=31.00;ReadPosRankSum=0.782;SOR=0.223	GT:AD:DP:GQ:PL	0/1:3,43:46:72:1770,0,72	4	4.3136	3.68182	0.0111521	1.23315	1.33225	0
d225008	Ib	Ih	FBgn0263397	1	2R:14276242	0.934783	2R	14276242	A	T	AT	FALSE	46	1762.6	AC=1;AF=0.500;AN=2;BaseQRankSum=0.365;DP=46;ExcessHet=3.0103;FS=2.656;MLEAC=1;MLEAF=0.500;MQ=60.00;MQRankSum=0.000;QD=33.40;ReadPosRankSum=0.625;SOR=0.223	GT:AD:DP:GQ:PL	0/1:3,43:46:72:1770,0,72	4	4.3136	3.68182	0.0111521	1.23315	1.33225	0
d225008	Ib	Ih	FBgn0263397	1	2R:14276342	0.780488	2R	14276342	C	T	CT	FALSE	82	1761.6	AC=1;AF=0.500;AN=2;BaseQRankSum=-3.808;DP=82;ExcessHet=3.0103;FS=6.681;MLEAC=1;MLEAF=0.500;MQ=60.00;MQRankSum=0.000;QD=21.48;ReadPosRankSum=-1.141;SOR=0.174	GT:AD:DP:GQ:PL	0/1:18,64:82:99:1769,0,393	4	4.3136	3.68182	0.0111521	1.23315	1.33225	0
d225008	Ib	Ih	FBgn0263397	1	2R:14277696	0.703704	2R	14277696	G	A	GA	FALSE	81	1601.6	AC=1;AF=0.500;AN=2;BaseQRankSum=-5.297;DP=81;ExcessHet=3.0103;FS=4.871;MLEAC=1;MLEAF=0.500;MQ=60.00;MQRankSum=0.000;QD=19.77;ReadPosRankSum=3.414;SOR=1.342	GT:AD:DP:GQ:PL	0/1:24,57:81:99:1609,0,663	4	4.3136	3.68182	0.0111521	1.23315	1.33225	0
d225008	Ib	Ih	FBgn0263397	1	2R:14277734	0.727273	2R	14277734	T	C	TC	FALSE	66	1538.6	AC=1;AF=0.500;AN=2;BaseQRankSum=4.274;DP=66;ExcessHet=3.0103;FS=1.123;MLEAC=1;MLEAF=0.500;MQ=60.00;MQRankSum=0.000;QD=23.31;ReadPosRankSum=1.203;SOR=0.526	GT:AD:DP:GQ:PL	0/1:18,48:66:99:1546,0,418	4	4.3136	3.68182	0.0111521	1.23315	1.33225	0
d225008	Ib	Ih	FBgn0263397	1	2R:14278193	0.74359	2R	14278193	C	T	CT	FALSE	39	804.6	AC=1;AF=0.500;AN=2;BaseQRankSum=-1.105;DP=39;ExcessHet=3.0103;FS=0.000;MLEAC=1;MLEAF=0.500;MQ=60.00;MQRankSum=0.000;QD=20.63;ReadPosRankSum=0.437;SOR=0.509	GT:AD:DP:GQ:PL	0/1:10,29:39:99:812,0,215	4	4.3136	3.68182	0.0111521	1.23315	1.33225	0
d225008	Ib	Ih	FBgn0263397	1	2R:14278216	0.595238	2R	14278216	T	C	TC	FALSE	42	721.6	AC=1;AF=0.500;AN=2;BaseQRankSum=3.284;DP=42;ExcessHet=3.0103;FS=0.000;MLEAC=1;MLEAF=0.500;MQ=60.00;MQRankSum=0.000;QD=17.18;ReadPosRankSum=-0.515;SOR=0.542	GT:AD:DP:GQ:PL	0/1:17,25:42:99:729,0,421	4	4.3136	3.68182	0.0111521	1.23315	1.33225	0
d225008	Ib	Ih	FBgn0263397	1	2R:14278289	0.6	2R	14278289	C	A	CA	FALSE	45	755.6	AC=1;AF=0.500;AN=2;BaseQRankSum=-1.832;DP=45;ExcessHet=3.0103;FS=1.737;MLEAC=1;MLEAF=0.500;MQ=60.00;MQRankSum=0.000;QD=16.79;ReadPosRankSum=0.763;SOR=1.236	GT:AD:DP:GQ:PL	0/1:18,27:45:99:763,0,460	4	4.3136	3.68182	0.0111521	1.23315	1.33225	0
d225008	Ib	Ih	FBgn0263397	1	2R:14278848	1	2R	14278848	A	T	AT	FALSE	98	2870.03	AC=2;AF=1.00;AN=2;DP=98;ExcessHet=3.0103;FS=0.000;MLEAC=2;MLEAF=1.00;MQ=60.00;QD=29.29;SOR=1.237	GT:AD:DP:GQ:PL	1/1:0,98:98:99:2884,289,0	4	4.3136	3.68182	0.0111521	1.23315	1.33225	0
d225008	Ib	Ih	FBgn0263397	1	2R:14279056	0.989247	2R	14279056	C	A	CA	FALSE	93	2926.03	AC=2;AF=1.00;AN=2;BaseQRankSum=-1.487;DP=93;ExcessHet=3.0103;FS=0.000;MLEAC=2;MLEAF=1.00;MQ=60.00;MQRankSum=0.000;QD=31.46;ReadPosRankSum=-0.617;SOR=0.349	GT:AD:DP:GQ:PL	1/1:1,92:93:99:2940,240,0	4	4.3136	3.68182	0.0111521	1.23315	1.33225	0
d225008	Ib	Flo1	FBgn0024754	-1	2R:15567324	0.412451	2R	15567324	C	T	GA	FALSE	257	3816.6	AC=1;AF=0.500;AN=2;BaseQRankSum=-5.037;DP=257;ExcessHet=3.0103;FS=40.394;MLEAC=1;MLEAF=0.500;MQ=60.00;MQRankSum=0.000;QD=14.85;ReadPosRankSum=-0.760;SOR=0.112	GT:AD:DP:GQ:PL	0/1:151,106:257:99:3824,0,5663	4	5.86928	5.98113	0.893514	2.83351	2.97426	0
d225008	Ib	Flo1	FBgn0024754	-1	2R:15569173	0.557692	2R	15569173	C	T	GA	FALSE	52	1140.6	AC=1;AF=0.500;AN=2;BaseQRankSum=-2.879;DP=52;ExcessHet=3.0103;FS=0.000;MLEAC=1;MLEAF=0.500;MQ=60.00;MQRankSum=0.000;QD=21.93;ReadPosRankSum=0.268;SOR=0.688	GT:AD:DP:GQ:PL	0/1:23,29:52:99:1148,0,878	4	5.86928	5.98113	0.893514	2.83351	2.97426	0
d225008	Ib	CG8314	FBgn0034057	-1	2R:15989921	0.433333	2R	15989921	A	C	TG	FALSE	120	1390.6	AC=1;AF=0.500;AN=2;BaseQRankSum=4.586;DP=120;ExcessHet=3.0103;FS=1.470;MLEAC=1;MLEAF=0.500;MQ=60.00;MQRankSum=0.000;QD=11.59;ReadPosRankSum=0.407;SOR=0.849	GT:AD:DP:GQ:PL	0/1:68,52:120:99:1398,0,1842	4	3.37659	3.91756	0.729489	2.94954	2.98204	0
d225008	Ib	ATPCL	FBgn0020236	-1	2R:15994473	1	2R	15994473	G	T	CA	FALSE	40	1297.03	AC=2;AF=1.00;AN=2;DP=40;ExcessHet=3.0103;FS=0.000;MLEAC=2;MLEAF=1.00;MQ=60.00;QD=32.43;SOR=1.445	GT:AD:DP:GQ:PL	1/1:0,40:40:99:1311,119,0	4	3.02082	2.76401	0.392183	2.11232	1.97778	0
d225008	Ib	Prosbeta1	FBgn0010590	-1	2R:16014304	0.926136	2R	16014304	A	G	TC	FALSE	352	11058	AC=2;AF=1.00;AN=2;BaseQRankSum=6.621;DP=352;ExcessHet=3.0103;FS=0.000;MLEAC=2;MLEAF=1.00;MQ=60.00;MQRankSum=0.000;QD=31.41;ReadPosRankSum=0.549;SOR=0.779	GT:AD:DP:GQ:PL	1/1:26,326:352:99:11072,244,0	4	7.74825	8.59438	0.615658	8.00597	7.82072	0
d225008	Ib	CG8405	FBgn0034071	1	2R:16048178	1	2R	16048178	C	T	CT	FALSE	49	1538.03	AC=2;AF=1.00;AN=2;DP=49;ExcessHet=3.0103;FS=0.000;MLEAC=2;MLEAF=1.00;MQ=60.00;QD=31.39;SOR=1.007	GT:AD:DP:GQ:PL	1/1:0,49:49:99:1552,146,0	4	2.53302	2.65448	0.692047	1.04381	0.98824	0
d225008	Ib	CG8405	FBgn0034071	1	2R:16048589	1	2R	16048589	A	C	AC	FALSE	20	691.03	AC=2;AF=1.00;AN=2;DP=20;ExcessHet=3.0103;FS=0.000;MLEAC=2;MLEAF=1.00;MQ=60.00;QD=34.55;SOR=6.091	GT:AD:DP:GQ:PL	1/1:0,20:20:60:705,60,0	4	2.53302	2.65448	0.692047	1.04381	0.98824	0
d225008	Ib	Ric	FBgn0265605	-1	2R:16107817	1	2R	16107817	C	T	GA	FALSE	84	2775.03	AC=2;AF=1.00;AN=2;DP=84;ExcessHet=3.0103;FS=0.000;MLEAC=2;MLEAF=1.00;MQ=60.00;QD=33.04;SOR=2.038	GT:AD:DP:GQ:PL	1/1:0,84:84:99:2789,252,0	4	4.76805	4.74994	0.98195	2.18522	1.83667	0
d225008	Ib	Ric	FBgn0265605	-1	2R:16107883	1	2R	16107883	T	G	AC	FALSE	85	3051.03	AC=2;AF=1.00;AN=2;DP=85;ExcessHet=3.0103;FS=0.000;MLEAC=2;MLEAF=1.00;MQ=60.00;QD=32.42;SOR=1.872	GT:AD:DP:GQ:PL	1/1:0,85:85:99:3065,255,0	4	4.76805	4.74994	0.98195	2.18522	1.83667	0
d225008	Ib	Ric	FBgn0265605	-1	2R:16107973	1	2R	16107973	G	A	CT	FALSE	93	3109.03	AC=2;AF=1.00;AN=2;DP=93;ExcessHet=3.0103;FS=0.000;MLEAC=2;MLEAF=1.00;MQ=60.00;QD=33.43;SOR=1.511	GT:AD:DP:GQ:PL	1/1:0,93:93:99:3123,278,0	4	4.76805	4.74994	0.98195	2.18522	1.83667	0
d225008	Ib	Lis-1	FBgn0015754	1	2R:16178898	0.279412	2R	16178898	C	G	CG	FALSE	68	451.6	AC=1;AF=0.500;AN=2;BaseQRankSum=-1.846;DP=68;ExcessHet=3.0103;FS=0.000;MLEAC=1;MLEAF=0.500;MQ=60.00;MQRankSum=0.000;QD=6.64;ReadPosRankSum=-0.486;SOR=0.527	GT:AD:DP:GQ:PL	0/1:49,19:68:99:459,0,1473	4	5.71834	6.47378	0.450267	2.80773	2.38484	0
[truncated: 52,324 more rows]
