# Supplementary material for: A stochastic RNA editing process targets a select number of sites in individual Drosophila glutamatergic motoneurons
Source: bioRxiv preprint, doi:10.1101/2024.05.17.594696, version 2 (2025-07-01)
Supplement: Supplemental Table 4 [file 594696_file06.xlsx]

## Sheet: Column descriptions
Column Title	Description
Gene	Name of gene
Edit Position	Position of the edit in the genome, formatted as chromosome:position
GenePart	Based on the genomic position and FlyBase annotations, where in the gene the edit falls. Options are either in the coding region (CDS), or in the Three Prime or Five Prime untranslated regions
BiologicalBaseChange	Because some genes are located on the minus DNA strand but RNA sequencing aligns to the plus DNA strand, edits on the minus strand need to find their complement to understand the correct effect the edit will have on the RNA produced. This column shows the true biological base change that will be found in the RNA.
AminoAcid_Original	The amino acid that would be produced from the un-edited RNA
AminoAcid_Edited	The amino acid that would be produced from the edited RNA
Mean Ib editing	Out of the Ib cells that had editing detected, the mean fraction of reads which contained an edited base pair. For example, 0.12 means on average 12% of the reads were edited.
Mean Is editing	Out of the Is cells that had editing detected, the mean fraction of reads which contained an edited base pair. For example, 0.12 means on average 12% of the reads were edited.
Mean M editing	Out of all muscle samples (not only those with editing that passed the filtering thresholds described for neurons in the methods), the mean fraction of reads which contained an edited base pair. For example, 0.12 means on average 12% of the reads were edited.
MutationType	For edits occuring in the coding region, this column classifies the type of mutation that occurs in the edited compared to the unedited RNA.
FlybaseID	The Flybase ID of the gene
DNAstrand	DNA strand upon which the gene is located
PreviouslyKnownRNAeditingSite	Based on publicly available annotations in FlyBase, whether this exact genomic position has been previously annotated as having RNA editing activity.
PfamDomain	Based on FlyBase annotations, whether this genomic position falls into an annotated protein domain.
GeneSummary	The Flybase gene summary
AminoAcid_Sequence	Used to easily locate protein region using BLAST. For edits occuring in the coding region, this column contains the unedited amino acid produced by the codon containing the edit, plus the following 9 amino acids.
Gene TPM in Ib	Expression level of gene in Ib cells, expressed in transcripts per million. Numbers from Jetti et al, 2023.
Gene TPM in Is	Expression level of gene in Is cells, expressed in transcripts per million. Numbers from Jetti et al, 2023.
Gene TPM adj pval	The p-value (adjusted for multiple tests) comparing expression level of the gene between Ib and Is. Numbers from Jetti et al, 2023.
Gene TPM in M1	Expression level of gene in muscle 1 cells, expressed in transcripts per million. Numbers from Jetti et al, 2023.
Gene TPM in M4	Expression level of gene in muscle 4 cells, expressed in transcripts per million. Numbers from Jetti et al, 2023.
REF	The reference DNA base at this position from the drosophila reference genome
ALT	The alternative (RNA edited) base detected in RNA sequencing
Canonical	True means the biological effect of the edit is A-to-G. False means not A-to-G.
Num of Ib cells with edit	Number of Ib cells with detectable edits passing threshold values as described in the methods.
Num of Ib cells without edit	Number of Ib cells without detectable edits passing threshold values as described in the methods.
Mean reads in Ib cells without edit	Mean number of RNA sequencing reads covering this position in Ib cells counted in column "Num of Ib cells without edit"
Mean reads in Ib cells with edit	Mean number of RNA sequencing reads covering this position in Ib cells counted in column "Num of Ib cells with edit"
Std Dev of Ib editing	The standard deviation of the mean editing in Ib cells from column "Num of Ib cells with edit". The mean is in column "Mean Ib editing".
Num of Is cells with Edit	Number of Is cells with detectable edits passing threshold values as described in the methods.
Num of Is cells without edit	Number of Is cells without detectable edits passing threshold values as described in the methods.
Mean reads in Is cells without edit	Mean number of RNA sequencing reads covering this position in Is cells counted in column "Num of Is cells without edit"
Mean reads in Is cells with edit	Mean number of RNA sequencing reads covering this position in Is cells counted in column "Num of Is cells with edit"
Std Dev of Is editing	The standard deviation of the mean editing in Is cells from column "Num of Is cells with edit". The mean is in column "Mean Is editing".
P-val of Ib vs Is editing	The p-value of a standard t-test comparing the mean number of reads edited in all Ib cells with editing and Is cells with editing for this edit.
Num of M samples with edit	Number of muscle samples with detectable edits passing threshold values as described in the methods.
Num of M cells without edit	Number of muscle samples without detectable edits passing threshold values as described in the methods.
Mean reads in M cells without edit	Mean number of RNA sequencing reads covering this position in muscle samples counted in column "Num of M cells without edit"
Mean reads in M samples with edit	Mean number of RNA sequencing reads covering this position in muscle samples counted in column "Num of M samples with edit"
Std Dev of M editing	The standard deviation of the mean editing in muscle samples from column "Num of M samples with edit". The mean is in column "Mean M editing".
P-val of Ib vs M editing	The p-value of a standard t-test comparing the mean number of reads edited in all Ib cells with editing and muscle samples with editing for this edit.
P-val of Is vs M editing	The p-value of a standard t-test comparing the mean number of reads edited in all Is cells with editing and muscle samples with editing for this edit.
Mean Ib editing - mean Is editing	The difference between the mean editing rates of Ib and Is cells. Useful for sorting rows to find edits with the largest difference in editing.
Mean Ib editing - mean M editing	The difference between the mean editing rates of Ib and muscle samples. Useful for sorting rows to find edits with the largest difference in editing.
Mean Is editing - mean M editing	The difference between the mean editing rates of Is and muscle samples. Useful for sorting rows to find edits with the largest difference in editing.
Num of Ib cells - num of Is cells	The difference between the number of Ib and Is cells that had detectable editing above thresholds described in the methods. Useful for sorting rows to find which edit positions have the largest difference in numbers of cells expressing it.
Num of Ib cells + num of Is cells	The sum of the number of Ib and Is cells that had detectable editing above thresholds described in the methods. Useful for sorting rows to find which edit positions have the largest numbers of cells expressing it.
Num of Ib cells - num of M cells	The difference between the number of Ib and muscle samples that had detectable editing above thresholds described in the methods. Useful for sorting rows to find which edit positions have the largest difference in numbers of cells expressing it.
Chromosome	The chromosome this edit is located in
Position	The numerical position along the chromosome this edit is located at.
DistFromClosestEdit	Distance from the closest editing site listed in this publication in either direction along the chromosome. For example, a value of 1 indicates that there is an edit described in this publication at a distance of 1 (ie neighboring) the current edit site.
Num of Ib cells with edit but failed filters	The number of Ib cells which had detectable editing from the RNA sequencing raw data, but did not pass the filters described in the methods. For example, a cell would be counted if 6/8 reads at this position were edited: editing was detected at 0.75 editing rate, but since there were less than 10 reads total at this site, this cell was excluded from analysis. This set of columns analyzing these c…
Mean reads in Ib cells with edit but failed filters	Mean number of reads in each cell from the column "Num of Ib cells with edit but failed filters"
Mean Ib editing in Ib cells with edit but failed filters	Mean editing rate in cells from the column "Num of Ib cells with edit but failed filters"
Std Dev of Ib editing in Ib cells with edit but failed filters	Standard deviation of the mean editing in cells from the column "Num of Ib cells with edit but failed filters"
Num of Is cells with edit but failed filters	The number of Is cells which had detectable editing from the RNA sequencing raw data, but did not pass the filters described in the methods. For example, a cell would be counted if 6/8 reads at this position were edited: editing was detected at 0.75 editing rate, but since there were less than 10 reads total at this site, this cell was excluded from analysis. This set of columns analyzing these c…
Mean reads in Is cells with edit but failed filters	Mean number of reads in each cell from the column "Num of Is cells with edit but failed filters"
Mean Is editing in Is cells with edit but failed filters	Mean editing rate in cells from the column "Num of Is cells with edit but failed filters"
Std Dev of Is editing in Is cells with edit but failed filters	Standard deviation of the mean editing in cells from the column "Num of Is cells with edit but failed filters"
PosInGenePart	Position in gene part. For edits located in the untranslated region, this column shows how many bases away from the beginning of the region this edit is. For example, a value of 67 for an edit located in the 3'UTR means that this edit is 67 bases from the beginning of the 3'UTR. This is useful for determining if there is a concentration of editing across genes at a particular region of the UTR.
PosInGenePartFrac	Related to the column "PosInGenePart", this shows the fractional value of how far this edit is into the gene part. For example, a value of .3 for an edit located in the 3'UTR means this edit is located 30% of the way through this gene's 3'UTR.
Codon_Original	The un-edited codon
Codon_Edited	The edited codon
AminoAcid_Sequence_align	For BLAST and alignment purposes, the protein sequence of the unedited amino acid plus 30 amino acids on either side. If the protein starts or ends before the 30 amino acids it is reflected in the sequence listed.
AminoAcidGroupChange	Whether or not the mutation in amino acid induced by the RNA editing causes a "significant" change in the amino acid group type. For example, a change from a negative to a positively charged amino acid. See publication text for detailed description.
Cell types with edit	Displays an "N" and/or an "M" if editing was detectable in neurons and/or muscles past the filtering thresholds described in the methods.

## Sheet: Sheet1
Gene	Edit Position	GenePart	BiologicalBaseChange	AminoAcid_Original	AminoAcid_Edited	Mean Ib editing	Mean Is editing	Mean M editing	MutationType	FlybaseID	DNAstrand	PreviouslyKnownRNAeditingSite	PfamDomain	GeneSummary	AminoAcid_Sequence	Gene TPM in Ib	Gene TPM in Is	Gene TPM adj pval	Gene TPM in M1	Gene TPM in M4	REF	ALT	Canonical	Num of Ib cells with edit	Num of Ib cells without edit	Mean reads in Ib cells without edit	Mean reads in Ib cells with edit	Std Dev of Ib editing	Num of Is cells with Edit	Num of Is cells without edit	Mean reads in Is cells without edit	Mean reads in Is cells with edit	Std Dev of Is editing	P-val of Ib vs Is editing	Num of M samples with edit	Num of M cells without edit	Mean reads in M cells without edit	Mean reads in M samples with edit	Std Dev of M editing	P-val of Ib vs M editing	P-val of Is vs M editing	Mean Ib editing - mean Is editing	Mean Ib editing - mean M editing	Mean Is editing - mean M editing	Num of Ib cells - num of Is cells	Num of Ib cells + num of Is cells	Num of Ib cells - num of M cells	Chromosome	Position
galectin	2L:76030	CDS	GA	E	K	0.565597	0.708884	0.264115	Missense	FBgn0031213	1	No	-	galectin (galectin) encodes a galactoside binding protein involved in synaptic target recognition.	EKNQMIKGKN	3.66117	3.81143	0.901401	3.71335	3.55701	G	A	FALSE	12	93	22.4194	29.6667	0.073306	7	94	24.3511	21.4286	0.114517	0.283885	3	40	6.95	19.6667	0.0169138	0.0671955	0.0397781	-0.143287	-19.1011	-18.9578	5	19	9	2L	76030
kis	2L:240642	CDS	GT	D	Y	0.245585	0.399143	0	Missense	FBgn0266557	-1	No	-	kismet (kis) encodes a chromodomain containing ATP-dependent transcription factor that controls gene expression through epigenetic mechanisms. The roles of the product of kis include developmental patterning of the embryo, cell proliferation, eye development, synaptic transmission, axonal pruning, and memory.	DYPSAYRSAV	4.15093	4.36337	0.701362	1.63488	1.43742	C	A	FALSE	9	96	14.4688	49.3333	0.0295441	14	87	19.1379	29.2143	0.0703838	0.108343	0	43	7.11628	0	0	0	0	-0.153558	0.245585	0.399143	-5	23	9	2L	240642
RpLP1	2L:420697	ThreePrimeUTR	TA	-	-	0.308217	0.304257	0.297828	-	FBgn0002593	1	No	-	Ribosomal protein LP1 (RpLP1) encodes a member of the cytoplasmic large ribosomal protein family.		12.3717	12.4148	0.881502	12.3429	12.0825	T	A	FALSE	5	100	17.44	52.6	0.0765857	6	95	18.2842	24	0.0575266	0.967294	19	24	17.2917	34.5789	0.01656	0.834819	0.882193	0.00396009	-34.2707	-34.2747	-1	11	-14	2L	420697
Tspo	2L:560372	ThreePrimeUTR	CT	-	-	0.377674	0.349893	0	-	FBgn0031263	1	No	-	Translocator protein (Tspo) encodes a protein localized in the outer mitochondrial membrane that is thought to be involved in various pathways, including steroid and heme biosynthesis, apoptosis, protein import, cell proliferation and differentiation and also has been proposed to participate in the formation of the mitochondrial permeability transition pore.		6.49291	7.43865	0.0623854	5.38362	5.57276	C	T	FALSE	12	93	65.7849	104.333	0.0723535	26	75	89.24	89.5769	0.0486481	0.750902	0	43	29.186	0	0	0	0	0.0277811	0.377674	0.349893	-14	38	12	2L	560372
IA-2	2L:1010390	ThreePrimeUTR	GA	-	-	0.268786	0.214419	0	-	FBgn0031294	-1	No	-	IA-2 protein tyrosine phosphatase (IA-2) encodes a protein involved in gut development and insulin-like peptide secretion.		6.54402	7.83614	2.09102e-08	0.302821	0.331543	C	T	FALSE	7	98	66.3776	90	0.0440073	11	90	134.778	100.182	0.0234297	0.249588	0	43	1.53488	0	0	0	0	0.0543671	0.268786	0.214419	-4	18	7	2L	1010390
IA-2	2L:1012323	ThreePrimeUTR	GC	-	-	0.292784	0.172234	0	-	FBgn0031294	-1	No	-	IA-2 protein tyrosine phosphatase (IA-2) encodes a protein involved in gut development and insulin-like peptide secretion.		6.54402	7.83614	2.09102e-08	0.302821	0.331543	C	G	FALSE	6	99	75.0202	69.6667	0.0405987	12	89	156	154	0.0109029	0.00164518	0	43	1.53488	0	0	0	0	0.12055	0.292784	0.172234	-6	18	6	2L	1012323
CG4577	2L:1140621	ThreePrimeUTR	TA	-	-	0.259643	0.280157	0	-	FBgn0031306	1	No	-	Is expressed in adult head.		5.85538	5.05184	0.659084	0.404889	0.874998	T	A	FALSE	20	85	101.482	65.5	0.033407	17	84	79.9643	61	0.0397881	0.693087	0	43	3.67442	0	0	0	0	-0.0205143	0.259643	0.280157	3	37	20	2L	1140621
RFeSP	2L:1612914	CDS	CT	N	N	0.571736	0.605202	0.549506	Silent	FBgn0021906	-1	No	Rieske_2Fe-2S	Predicted to enable ubiquinol-cytochrome-c reductase activity. Predicted to be involved in mitochondrial electron transport, ubiquinol to cytochrome c. Located in mitochondrion. Is expressed in several structures, including Malpighian tubule; embryonic/larval muscle system; germ layer; germ layer derivative; and gut. Human ortholog(s) of this gene implicated in mitochondrial complex III deficienc…	NAGDWGGYYC	8.16639	7.73104	0.887261	7.02983	7.46021	G	A	FALSE	11	94	148.223	200.182	0.0691043	23	78	147.577	113.565	0.0506745	0.704769	13	30	98.2333	108.385	0.018746	0.741417	0.426824	-0.0334652	-107.813	-107.779	-12	34	-2	2L	1612914
RFeSP	2L:1612917	CDS	GA	A	A	0.567417	0.607809	0.555303	Silent	FBgn0021906	-1	No	Rieske_2Fe-2S	Predicted to enable ubiquinol-cytochrome-c reductase activity. Predicted to be involved in mitochondrial electron transport, ubiquinol to cytochrome c. Located in mitochondrion. Is expressed in several structures, including Malpighian tubule; embryonic/larval muscle system; germ layer; germ layer derivative; and gut. Human ortholog(s) of this gene implicated in mitochondrial complex III deficienc…	ANAGDWGGYY	8.16639	7.73104	0.887261	7.02983	7.46021	C	T	FALSE	11	94	148.617	200.273	0.0694274	23	78	148.449	112.522	0.0510971	0.649987	13	30	98.6667	109.154	0.0199409	0.858627	0.458274	-0.0403918	-108.586	-108.546	-12	34	-2	2L	1612917
RFeSP	2L:1613053	CDS	GA	E	E	0.566461	0.590507	0.530384	Silent	FBgn0021906	-1	No	Rieske_2Fe-2S	Predicted to enable ubiquinol-cytochrome-c reductase activity. Predicted to be involved in mitochondrial electron transport, ubiquinol to cytochrome c. Located in mitochondrion. Is expressed in several structures, including Malpighian tubule; embryonic/larval muscle system; germ layer; germ layer derivative; and gut. Human ortholog(s) of this gene implicated in mitochondrial complex III deficienc…	EADDQRVIKP	8.16639	7.73104	0.887261	7.02983	7.46021	C	T	FALSE	11	94	210.447	312.909	0.0649217	23	78	210.782	188.826	0.0521861	0.786281	14	29	141.621	149.5	0.0207179	0.565293	0.390468	-0.0240466	-148.934	-148.909	-12	34	-3	2L	1613053
chinmo	2L:1651563	FivePrimeUTR	TC	-	-	0.509441	0.761811	0.487013	-	FBgn0086758	1	No	-	Chronologically inappropriate morphogenesis (chinmo) encodes a putative BTB-zinc finger transcription factor. It is essential for neuronal temporal patterning. It also plays a role in the regulation of eye development, tumor formation, and the self-renewal and/or sexual identity of male somatic cyst stem cells by acting downstream of JAK-STAT signaling.		4.89124	3.28942	2.254e-05	2.01378	1.91915	T	C	FALSE	17	88	74.4091	97.6471	0.0691379	9	92	37.5	36.3333	0.105457	0.0494604	3	40	12.225	12	0.0822226	0.897053	0.185705	-0.25237	-11.4906	-11.2382	8	26	14	2L	1651563
chinmo	2L:1700658	ThreePrimeUTR	GA	-	-	0.583722	0	0.272727	-	FBgn0086758	1	No	-	Chronologically inappropriate morphogenesis (chinmo) encodes a putative BTB-zinc finger transcription factor. It is essential for neuronal temporal patterning. It also plays a role in the regulation of eye development, tumor formation, and the self-renewal and/or sexual identity of male somatic cyst stem cells by acting downstream of JAK-STAT signaling.		4.89124	3.28942	2.254e-05	2.01378	1.91915	G	A	FALSE	30	75	52.92	78.5667	0.0512256	0	101	29.7426	0	0	0	1	42	12.6667	11	0	0.284515	0	0.583722	-10.4163	-11	30	30	29	2L	1700658
chinmo	2L:1702126	ThreePrimeUTR	TC	-	-	0.544244	0	0	-	FBgn0086758	1	No	-	Chronologically inappropriate morphogenesis (chinmo) encodes a putative BTB-zinc finger transcription factor. It is essential for neuronal temporal patterning. It also plays a role in the regulation of eye development, tumor formation, and the self-renewal and/or sexual identity of male somatic cyst stem cells by acting downstream of JAK-STAT signaling.		4.89124	3.28942	2.254e-05	2.01378	1.91915	T	C	FALSE	13	92	15.9891	39.3846	0.0822269	0	101	9.70297	0	0	0	0	43	5.83721	0	0	0	0	0.544244	0.544244	0	13	13	13	2L	1702126
chinmo	2L:1702167	ThreePrimeUTR	AC	-	-	0.569415	0	0	-	FBgn0086758	1	No	-	Chronologically inappropriate morphogenesis (chinmo) encodes a putative BTB-zinc finger transcription factor. It is essential for neuronal temporal patterning. It also plays a role in the regulation of eye development, tumor formation, and the self-renewal and/or sexual identity of male somatic cyst stem cells by acting downstream of JAK-STAT signaling.		4.89124	3.28942	2.254e-05	2.01378	1.91915	A	C	FALSE	11	94	16.4362	47.9091	0.0952465	0	101	9.79208	0	0	0	0	43	5.83721	0	0	0	0	0.569415	0.569415	0	11	11	11	2L	1702167
cpb	2L:1705037	FivePrimeUTR	CT	-	-	0.837438	0.771119	1	-	FBgn0011570	1	No	-	capping protein beta (cpb) encodes an actin-binding protein that, together with cpa, binds to the fast growing ends of actin filaments, restricting the addition or loss of actin monomers. It restricts JNK signaling, modulates Hippo signaling, maintains epithelial integrity and neuronal homeostasis, controls proliferation/apoptosis in wing imaginal discs, and promotes oogenesis.		3.85581	4.22635	0.953641	3.46312	3.30249	C	T	FALSE	18	87	16.4828	30.2222	0.0562066	9	92	23.4022	22.8889	0.104973	0.545913	1	42	7.7619	14	0	0.515895	0.510011	0.066319	-13.1626	-13.2289	9	27	17	2L	1705037
cpb	2L:1705436	CDS	CA	R	R	0.780501	0	0	Silent	FBgn0011570	1	No	CAPZB	capping protein beta (cpb) encodes an actin-binding protein that, together with cpa, binds to the fast growing ends of actin filaments, restricting the addition or loss of actin monomers. It restricts JNK signaling, modulates Hippo signaling, maintains epithelial integrity and neuronal homeostasis, controls proliferation/apoptosis in wing imaginal discs, and promotes oogenesis.	RRLPPQQIEK	3.85581	4.22635	0.953641	3.46312	3.30249	C	A	FALSE	17	88	16.2614	28.0588	0.0639662	0	101	20.8911	0	0	0	0	43	8.65116	0	0	0	0	0.780501	0.780501	0	17	17	17	2L	1705436
cpb	2L:1705978	CDS	CA	T	T	0.645601	0	0.419048	Silent	FBgn0011570	1	No	CAPZB	capping protein beta (cpb) encodes an actin-binding protein that, together with cpa, binds to the fast growing ends of actin filaments, restricting the addition or loss of actin monomers. It restricts JNK signaling, modulates Hippo signaling, maintains epithelial integrity and neuronal homeostasis, controls proliferation/apoptosis in wing imaginal discs, and promotes oogenesis.	TRQQEQDANV	3.85581	4.22635	0.953641	3.46312	3.30249	C	A	FALSE	18	87	16.2529	38.0556	0.0609522	0	101	22.0099	0	0	0	2	41	7.36585	14.5	0.152381	0.251237	0	0.645601	-13.8544	-14.5	18	18	16	2L	1705978
Snx21	2L:2764360	CDS	CG	T	T	0.579875	0.439492	0	Silent	FBgn0031457	-1	No	-	Predicted to enable phosphatidylinositol phosphate binding activity. Predicted to be involved in protein transport. Predicted to be active in early endosome membrane. Is expressed in organism. Orthologous to human SNX20 (sorting nexin 20) and SNX21 (sorting nexin family member 21).	TESLMQAIHK	3.71689	5.92923	0.00165457	2.46603	2.37167	G	C	FALSE	7	98	27.102	24	0.112743	13	88	66.0795	63.3077	0.0500071	0.202827	0	43	8.60465	0	0	0	0	0.140383	0.579875	0.439492	-6	20	7	2L	2764360
Snx21	2L:2764361	CDS	CT	T	I	0.562208	0.431606	0.363636	Missense	FBgn0031457	-1	No	-	Predicted to enable phosphatidylinositol phosphate binding activity. Predicted to be involved in protein transport. Predicted to be active in early endosome membrane. Is expressed in organism. Orthologous to human SNX20 (sorting nexin 20) and SNX21 (sorting nexin family member 21).	TESLMQAIHK	3.71689	5.92923	0.00165457	2.46603	2.37167	G	A	FALSE	7	98	27.051	23.7143	0.111852	13	88	65.7386	64.2308	0.050092	0.232952	1	42	8.45238	11	0	0.553345	0.723176	0.130602	-10.4378	-10.5684	-6	20	6	2L	2764361
Snx21	2L:2764365	CDS	AT	N	Y	0.565487	0.425351	0	Missense	FBgn0031457	-1	No	-	Predicted to enable phosphatidylinositol phosphate binding activity. Predicted to be involved in protein transport. Predicted to be active in early endosome membrane. Is expressed in organism. Orthologous to human SNX20 (sorting nexin 20) and SNX21 (sorting nexin family member 21).	NTESLMQAIH	3.71689	5.92923	0.00165457	2.46603	2.37167	T	A	FALSE	7	98	25.6633	23.1429	0.109891	13	88	58.1705	62.4615	0.0494232	0.195129	0	43	7.95349	0	0	0	0	0.140136	0.565487	0.425351	-6	20	7	2L	2764365
Snx21	2L:2764367	CDS	CA	A	E	0.48835	0.325421	0	Missense	FBgn0031457	-1	No	-	Predicted to enable phosphatidylinositol phosphate binding activity. Predicted to be involved in protein transport. Predicted to be active in early endosome membrane. Is expressed in organism. Orthologous to human SNX20 (sorting nexin 20) and SNX21 (sorting nexin family member 21).	ANTESLMQAI	3.71689	5.92923	0.00165457	2.46603	2.37167	G	T	FALSE	7	98	25.7245	19.2857	0.124419	13	88	56.7955	56.2308	0.0401864	0.13796	0	43	7.95349	0	0	0	0	0.162929	0.48835	0.325421	-6	20	7	2L	2764367
Snx21	2L:2764369	CDS	GA	T	T	0.445486	0.330495	0	Silent	FBgn0031457	-1	No	-	Predicted to enable phosphatidylinositol phosphate binding activity. Predicted to be involved in protein transport. Predicted to be active in early endosome membrane. Is expressed in organism. Orthologous to human SNX20 (sorting nexin 20) and SNX21 (sorting nexin family member 21).	TANTESLMQA	3.71689	5.92923	0.00165457	2.46603	2.37167	C	T	FALSE	10	95	24.2421	30	0.11041	18	83	54.8554	66.8889	0.0541348	0.302104	0	43	8.04651	0	0	0	0	0.114991	0.445486	0.330495	-8	28	10	2L	2764369
Snx21	2L:2764378	CDS	CT	G	G	0.366673	0.29333	0	Silent	FBgn0031457	-1	No	-	Predicted to enable phosphatidylinositol phosphate binding activity. Predicted to be involved in protein transport. Predicted to be active in early endosome membrane. Is expressed in organism. Orthologous to human SNX20 (sorting nexin 20) and SNX21 (sorting nexin family member 21).	GINTANTESL	3.71689	5.92923	0.00165457	2.46603	2.37167	G	A	FALSE	9	96	24.6875	36.4444	0.113011	16	85	60.7176	49.5	0.0687668	0.561628	0	43	8	0	0	0	0	0.0733436	0.366673	0.29333	-7	25	9	2L	2764378
GABPI	2L:3031624	CDS	CT	C	C	0.644486	0.696488	0	Silent	FBgn0031495	1	No	Palmitoyltrfase_DHHC	beta4GalNAcTB pilot (GABPI) encodes a Golgi multitransmembrane protein of the DHHC family. In contrast to other members of the DHHC family, it lacks palmitoylation activity. It is required for Golgi localization and for the activity of the glycosphingolipid specific glycosyltransferase encoded by beta4GalNAcTB.	CRKVTPRRAY	5.07999	4.62842	0.406977	1.27435	1.33135	C	T	FALSE	17	88	31.7841	55.1765	0.0434857	16	85	24.9176	42.75	0.0659072	0.510212	0	43	2.4186	0	0	0	0	-0.0520019	0.644486	0.696488	1	33	17	2L	3031624
toc	2L:3127197	CDS	GA	E	E	0.940476	0.891026	0	Silent	FBgn0015600	-1	No	-	toucan (toc) encodes a protein that associates with spindle microtubules being involved in mitotic spindle organization, mitotic sister chromatid segregation and ovarian follicle cell formation.	ESPVPNETKV	2.90338	3.0015	0.854332	0.60002	0.848108	C	T	FALSE	12	93	4.46237	22.25	0.0438145	5	96	5.41667	29.2	0.0896061	0.584272	0	43	3	0	0	0	0	0.0494505	0.940476	0.891026	7	17	12	2L	3127197
toc	2L:3127443	CDS	TC	F	F	0.942382	0.914286	0	Silent	FBgn0015600	-1	No	-	toucan (toc) encodes a protein that associates with spindle microtubules being involved in mitotic spindle organization, mitotic sister chromatid segregation and ovarian follicle cell formation.	FSPKSSASAN	2.90338	3.0015	0.854332	0.60002	0.848108	A	G	FALSE	12	93	4.45161	27.75	0.0479279	5	96	6.54167	34.8	0.0857143	0.764786	0	43	3	0	0	0	0	0.0280962	0.942382	0.914286	7	17	12	2L	3127443
toc	2L:3144387	FivePrimeUTR	GT	-	-	0.925974	0.796296	0	-	FBgn0015600	-1	No	-	toucan (toc) encodes a protein that associates with spindle microtubules being involved in mitotic spindle organization, mitotic sister chromatid segregation and ovarian follicle cell formation.		2.90338	3.0015	0.854332	0.60002	0.848108	C	A	FALSE	11	94	5.20213	18.8182	0.0560552	3	98	7.13265	39.3333	0.151581	0.340845	0	43	2.95349	0	0	0	0	0.129678	0.925974	0.796296	8	14	11	2L	3144387
toc	2L:3144421	FivePrimeUTR	AT	-	-	0.926347	0.84727	0	-	FBgn0015600	-1	No	-	toucan (toc) encodes a protein that associates with spindle microtubules being involved in mitotic spindle organization, mitotic sister chromatid segregation and ovarian follicle cell formation.		2.90338	3.0015	0.854332	0.60002	0.848108	T	A	FALSE	12	93	5.06452	21.5833	0.05361	5	96	6.60417	34	0.0743124	0.423895	0	43	2.95349	0	0	0	0	0.0790763	0.926347	0.84727	7	17	12	2L	3144421
gkt	2L:3160233	CDS	CG	S	W	0.978039	0.914015	0	Missense	FBgn0260817	1	No	-	glaikit (gkt) encodes a member of the phospholipase D superfamily. It is essential for the formation of epithelial polarity and nervous system development.	SGDYEIPANY	1.75442	2.16285	0.634118	0.39653	0.732201	C	G	FALSE	15	90	5.83333	28.6667	0.0219608	15	86	7.26744	30.2	0.0591379	0.318841	0	43	3.46512	0	0	0	0	0.0640241	0.978039	0.914015	0	30	15	2L	3160233
gkt	2L:3160277	CDS	CA	H	N	0.927355	0.938015	0	Missense	FBgn0260817	1	No	-	glaikit (gkt) encodes a member of the phospholipase D superfamily. It is essential for the formation of epithelial polarity and nervous system development.	HTQLKLLEKL	1.75442	2.16285	0.634118	0.39653	0.732201	C	A	FALSE	13	92	6.09783	26.4615	0.0488444	14	87	7.17241	27.3571	0.04221	0.869631	0	43	3.60465	0	0	0	0	-0.0106601	0.927355	0.938015	-1	27	13	2L	3160277
gkt	2L:3160300	CDS	GA	E	E	0.925275	0.939286	0	Silent	FBgn0260817	1	No	-	glaikit (gkt) encodes a member of the phospholipase D superfamily. It is essential for the formation of epithelial polarity and nervous system development.	EKLFPKQATN	1.75442	2.16285	0.634118	0.39653	0.732201	G	A	FALSE	13	92	6.29348	27.6923	0.056825	14	87	6.72414	29.7857	0.0419899	0.842873	0	43	3.55814	0	0	0	0	-0.014011	0.925275	0.939286	-1	27	13	2L	3160300
gkt	2L:3160588	CDS	CT	L	L	0.887164	0.963675	0	Silent	FBgn0260817	1	No	Tdp1	glaikit (gkt) encodes a member of the phospholipase D superfamily. It is essential for the formation of epithelial polarity and nervous system development.	LTAITDSKPT	1.75442	2.16285	0.634118	0.39653	0.732201	C	T	FALSE	7	98	6.15306	22	0.0763594	12	89	6.75281	26.25	0.0363248	0.31989	0	43	3.51163	0	0	0	0	-0.0765117	0.887164	0.963675	-5	19	7	2L	3160588
gkt	2L:3161068	CDS	TC	D	D	0.831169	0.918601	0	Silent	FBgn0260817	1	No	Tdp1	glaikit (gkt) encodes a member of the phospholipase D superfamily. It is essential for the formation of epithelial polarity and nervous system development.	DADTGAGESL	1.75442	2.16285	0.634118	0.39653	0.732201	T	C	FALSE	7	98	5.83673	23.7143	0.119734	11	90	7.81111	25.3636	0.0591005	0.476936	0	43	3.62791	0	0	0	0	-0.0874326	0.831169	0.918601	-4	18	7	2L	3161068
gkt	2L:3161173	CDS	TC	I	I	1	0.957702	0	Silent	FBgn0260817	1	No	Tdp1	glaikit (gkt) encodes a member of the phospholipase D superfamily. It is essential for the formation of epithelial polarity and nervous system development.	IRNSDFSAIN	1.75442	2.16285	0.634118	0.39653	0.732201	T	C	FALSE	8	97	5.45361	33.75	0	12	89	7.22472	26.8333	0.0354042	0.346566	0	43	3.5814	0	0	0	0	0.042298	1	0.957702	-4	20	8	2L	3161173
gkt	2L:3161176	CDS	GA	R	R	1	0.957071	0	Silent	FBgn0260817	1	No	Tdp1	glaikit (gkt) encodes a member of the phospholipase D superfamily. It is essential for the formation of epithelial polarity and nervous system development.	RNSDFSAINV	1.75442	2.16285	0.634118	0.39653	0.732201	G	A	FALSE	10	95	5.27368	29.5	0	12	89	7.14607	27.1667	0.0354763	0.284364	0	43	3.5814	0	0	0	0	0.0429293	1	0.957071	-2	22	10	2L	3161176
Hydr2	2L:3163979	CDS	TC	L	L	0.950175	0.952381	0	Silent	FBgn0014906	1	No	-	alpha/beta hydrolase2 (Hydr2) encodes a lipase involved in lipid metabolism.	LNVHSQPLKP	2.47882	1.81392	0.0606409	0.927258	1.49242	T	C	FALSE	13	92	5.42391	27.8462	0.0498252	7	94	6.44681	31.1429	0.047619	0.977387	0	43	3.65116	0	0	0	0	-0.00220613	0.950175	0.952381	6	20	13	2L	3163979
Hydr2	2L:3164021	CDS	TG	L	M	0.941667	0.931973	0	Missense	FBgn0014906	1	No	-	alpha/beta hydrolase2 (Hydr2) encodes a lipase involved in lipid metabolism.	LDAHFLDCLY	2.47882	1.81392	0.0606409	0.927258	1.49242	T	G	FALSE	12	93	4.95699	25	0.0583333	7	94	6.04255	24.2857	0.0604639	0.915065	0	43	3.67442	0	0	0	0	0.00969388	0.941667	0.931973	5	19	12	2L	3164021
Hydr2	2L:3167039	CDS	GA	R	R	0.945652	0.894231	0	Silent	FBgn0014906	1	No	-	alpha/beta hydrolase2 (Hydr2) encodes a lipase involved in lipid metabolism.	RVRCPWPLGE	2.47882	1.81392	0.0606409	0.927258	1.49242	G	A	FALSE	12	93	4.27957	25.4167	0.0543478	8	93	6.13978	28.875	0.105769	0.641124	0	43	3.86047	0	0	0	0	0.0514214	0.945652	0.894231	4	20	12	2L	3167039
CG9662	2L:3376197	CDS	CT	T	T	0.668961	0.637386	0.444444	Silent	FBgn0031529	-1	No	OligosaccharylTrfase_OST3/OST6	Subunit of the oligosaccharyl transferase (OST) complex that catalyzes the initial transfer of a defined glycan (Glc(3)Man(9)GlcNAc(2) in eukaryotes) from the lipid carrier dolichol-pyrophosphate to an asparagine residue within an Asn-X-Ser/Thr consensus motif in nascent polypeptide chains, the first step in protein N-glycosylation. N-glycosylation occurs cotranslationally and the complex associa…	TAMGFIFILV	4.79971	4.26303	0.58721	2.25071	2.37554	G	A	FALSE	51	54	15.9074	64.2353	0.0412671	38	63	17.2857	52.1842	0.0416847	0.599133	1	42	9.52381	18	0	0.454105	0.463271	0.031575	-17.331	-17.3626	13	89	50	2L	3376197
CG9662	2L:3376230	CDS	GC	P	P	0.637411	0.609599	0.444444	Silent	FBgn0031529	-1	No	OligosaccharylTrfase_OST3/OST6	Subunit of the oligosaccharyl transferase (OST) complex that catalyzes the initial transfer of a defined glycan (Glc(3)Man(9)GlcNAc(2) in eukaryotes) from the lipid carrier dolichol-pyrophosphate to an asparagine residue within an Asn-X-Ser/Thr consensus motif in nascent polypeptide chains, the first step in protein N-glycosylation. N-glycosylation occurs cotranslationally and the complex associa…	PGKTNLNRLL	4.79971	4.26303	0.58721	2.25071	2.37554	C	G	FALSE	47	58	15.2414	59.7447	0.0427994	37	64	16.5	46.6486	0.0433473	0.653362	1	42	9.16667	18	0	0.518436	0.540421	0.0278123	-17.3626	-17.3904	10	84	46	2L	3376230
CG9662	2L:3376254	CDS	TC	I	I	0.650689	0.636485	0.257576	Silent	FBgn0031529	-1	No	OligosaccharylTrfase_OST3/OST6	Subunit of the oligosaccharyl transferase (OST) complex that catalyzes the initial transfer of a defined glycan (Glc(3)Man(9)GlcNAc(2) in eukaryotes) from the lipid carrier dolichol-pyrophosphate to an asparagine residue within an Asn-X-Ser/Thr consensus motif in nascent polypeptide chains, the first step in protein N-glycosylation. N-glycosylation occurs cotranslationally and the complex associa…	IIMDQTHTPG	4.79971	4.26303	0.58721	2.25071	2.37554	A	G	FALSE	49	56	19.1429	66.9592	0.0428873	40	61	18.0492	52.375	0.0408189	0.813781	2	41	9.46341	14.5	0.0757576	0.0730995	0.0472729	0.0142047	-13.8493	-13.8635	9	89	47	2L	3376254
Snx1	2L:3451631	ThreePrimeUTR	TA	-	-	0.7097	0.832444	0	-	FBgn0031534	1	No	-	Predicted to enable phosphatidylinositol-3-phosphate binding activity. Predicted to be involved in early endosome to Golgi transport. Predicted to be part of retromer, tubulation complex. Predicted to be active in endosome membrane. Is expressed in several structures, including circulatory system; embryonic/larval nervous system; germline cell; gut section; and plasmatocyte primordium. Orthologou…		1.59001	2.6723	0.203485	1.66581	1.77491	T	A	FALSE	10	95	6.23158	36.2	0.119228	17	84	7.32143	41.9412	0.0702821	0.350775	0	43	8.81395	0	0	0	0	-0.122744	0.7097	0.832444	-7	27	10	2L	3451631
Snx1	2L:3451632	ThreePrimeUTR	TG	-	-	0.659299	0.831399	0	-	FBgn0031534	1	No	-	Predicted to enable phosphatidylinositol-3-phosphate binding activity. Predicted to be involved in early endosome to Golgi transport. Predicted to be part of retromer, tubulation complex. Predicted to be active in endosome membrane. Is expressed in several structures, including circulatory system; embryonic/larval nervous system; germline cell; gut section; and plasmatocyte primordium. Orthologou…		1.59001	2.6723	0.203485	1.66581	1.77491	T	G	FALSE	11	94	5.42553	44.7273	0.119647	17	84	7.75	45.2941	0.0692938	0.193076	0	43	8.90698	0	0	0	0	-0.1721	0.659299	0.831399	-6	28	11	2L	3451632
Snx1	2L:3451743	ThreePrimeUTR	CA	-	-	0.65884	0.889537	0	-	FBgn0031534	1	No	-	Predicted to enable phosphatidylinositol-3-phosphate binding activity. Predicted to be involved in early endosome to Golgi transport. Predicted to be part of retromer, tubulation complex. Predicted to be active in endosome membrane. Is expressed in several structures, including circulatory system; embryonic/larval nervous system; germline cell; gut section; and plasmatocyte primordium. Orthologou…		1.59001	2.6723	0.203485	1.66581	1.77491	C	A	FALSE	12	93	4.97849	38.25	0.104812	23	78	9.28205	32.6957	0.0423126	0.0209672	0	43	8.90698	0	0	0	0	-0.230697	0.65884	0.889537	-11	35	12	2L	3451743
Snx1	2L:3451853	ThreePrimeUTR	GA	-	-	0.60739	0.787987	0	-	FBgn0031534	1	No	-	Predicted to enable phosphatidylinositol-3-phosphate binding activity. Predicted to be involved in early endosome to Golgi transport. Predicted to be part of retromer, tubulation complex. Predicted to be active in endosome membrane. Is expressed in several structures, including circulatory system; embryonic/larval nervous system; germline cell; gut section; and plasmatocyte primordium. Orthologou…		1.59001	2.6723	0.203485	1.66581	1.77491	G	A	FALSE	12	93	4.83871	38.25	0.103079	27	74	7.18919	48.1852	0.0590085	0.114952	0	43	9.09302	0	0	0	0	-0.180596	0.60739	0.787987	-15	39	12	2L	3451853
Snx1	2L:3451877	ThreePrimeUTR	TG	-	-	0.677091	0.807167	0	-	FBgn0031534	1	No	-	Predicted to enable phosphatidylinositol-3-phosphate binding activity. Predicted to be involved in early endosome to Golgi transport. Predicted to be part of retromer, tubulation complex. Predicted to be active in endosome membrane. Is expressed in several structures, including circulatory system; embryonic/larval nervous system; germline cell; gut section; and plasmatocyte primordium. Orthologou…		1.59001	2.6723	0.203485	1.66581	1.77491	T	G	FALSE	12	93	3.94624	32.3333	0.0987534	21	80	7.0625	44.7143	0.0627119	0.251952	0	43	8.95349	0	0	0	0	-0.130076	0.677091	0.807167	-9	33	12	2L	3451877
CG12795	2L:3453158	CDS	GT	M	I	0.774799	0.689782	0.523068	Missense	FBgn0031535	1	No	-	Predicted to enable zinc ion binding activity. Predicted to be involved in proteasome-mediated ubiquitin-dependent protein catabolic process and protein targeting to ER. Predicted to be active in endoplasmic reticulum. Is expressed in organism. Orthologous to several human genes including ZFAND2B (zinc finger AN1-type containing 2B).	MAAQAAERRQ	1.8493	2.3088	0.405236	3.24675	2.64592	G	T	FALSE	11	94	5.51064	27.4545	0.0978044	17	84	10.6786	35.4118	0.070878	0.477736	4	39	10.7949	18.25	0.063169	0.162151	0.285262	0.0850167	-17.4752	-17.5602	-6	28	7	2L	3453158
Thor	2L:3479300	CDS	CA	P	P	0.608729	0.607317	0.510615	Silent	FBgn0261560	1	No	EIF4EBP	Thor (Thor) encodes a eukaryotic translation initiation factor 4E binding protein that is controlled by the product of tor. It contributes to translation regulation, response to environmental stress and cell growth regulation.	PFRKCVPVPT	4.02038	3.58018	0.652908	11.318	10.933	C	A	FALSE	33	72	10.5417	316.788	0.042139	32	69	24.5507	158.812	0.0390241	0.980493	36	7	888.286	916.139	0.00967359	0.0211713	0.0136651	0.0014119	-915.53	-915.532	1	65	-3	2L	3479300
CG17593	2L:3516924	CDS	GA	Q	Q	0.668264	0.855235	0	Silent	FBgn0031544	1	No	CCDC47	Predicted to enable calcium ion binding activity. Predicted to be involved in endoplasmic reticulum calcium ion homeostasis. Located in cytoplasm. Is expressed in several structures, including adult head; embryonic/larval muscle system; germ layer; germ layer derivative; and gut section. Orthologous to human CCDC47 (coiled-coil domain containing 47).	QAKRNAPKMK	3.01456	2.37419	0.440131	1.92392	1.63878	G	A	FALSE	20	85	8.03529	30.65	0.0625677	18	83	4.55422	21.1111	0.048554	0.0259326	0	43	5.76744	0	0	0	0	-0.18697	0.668264	0.855235	2	38	20	2L	3516924
CG8852	2L:3527152	CDS	GT	S	S	0.604651	0.820513	0.537429	Silent	FBgn0031548	1	No	-	Predicted to be active in plasma membrane.	SFVEEMPKLD	0.171964	0.0793519	0.0150103	2.58073	2.20434	G	T	FALSE	1	104	3.17308	44	0	3	98	1.45918	19.6667	0.179487	0.608701	21	22	9.86364	28.7619	0.0298983	0.636888	0.00925812	-0.215862	-28.1573	-27.9414	-2	4	-20	2L	3527152
CG16704	2L:3692202	CDS	AC	E	A	0.887324	0.688666	0.479143	Missense	FBgn0031558	-1	No	Kunitz_BPTI	Predicted to enable serine-type endopeptidase inhibitor activity.	EKCKI*	0.744555	1.37301	0.666738	1.68991	2.5269	T	G	FALSE	4	101	2.41584	134.75	0.112676	11	90	1.5	43.6364	0.0990042	0.288824	5	38	3.10526	17.2	0.0673328	0.0137565	0.200194	0.198658	-16.3127	-16.5113	-7	15	-1	2L	3692202
CG43707	2L:3768643	ThreePrimeUTR	TC	-	-	0.658994	0.766552	0	-	FBgn0263846	1	No	-	Located in Z disc. Is expressed in adult head.		2.97399	2.45734	0.623476	0.125265	0.0819589	T	C	FALSE	11	94	3.02128	25.1818	0.111961	6	95	3.51579	35.5	0.149071	0.574547	0	43	0.697674	0	0	0	0	-0.107557	0.658994	0.766552	5	17	11	2L	3768643
CG43707	2L:3768903	ThreePrimeUTR	TA	-	-	0.905682	0.748793	0	-	FBgn0263846	1	No	-	Located in Z disc. Is expressed in adult head.		2.97399	2.45734	0.623476	0.125265	0.0819589	T	A	FALSE	11	94	5.65957	28.9091	0.0672378	11	90	5.36667	24	0.106422	0.227052	0	43	0.744186	0	0	0	0	0.156889	0.905682	0.748793	0	22	11	2L	3768903
Reph	2L:3809296	ThreePrimeUTR	GT	-	-	0.778724	0.850778	0	-	FBgn0021800	1	No	-	Regulator of eph expression (Reph) encodes a putative nuclear protein involved in visual system development via the regulation of the product of Eph.		4.11897	3.11712	0.00739119	1.28769	0.784477	G	T	FALSE	14	91	5.52747	26.2857	0.0735881	9	92	9.59783	27.3333	0.100278	0.560777	0	43	1.16279	0	0	0	0	-0.0720538	0.778724	0.850778	5	23	14	2L	3809296
Reph	2L:3810139	ThreePrimeUTR	TC	-	-	0.932838	0.946429	0	-	FBgn0021800	1	No	-	Regulator of eph expression (Reph) encodes a putative nuclear protein involved in visual system development via the regulation of the product of Eph.		4.11897	3.11712	0.00739119	1.28769	0.784477	T	C	FALSE	16	89	11.9326	31.9375	0.0310028	8	93	4.31183	40.5	0.0535714	0.816148	0	43	1.44186	0	0	0	0	-0.0135903	0.932838	0.946429	8	24	16	2L	3810139
CG3702	2L:4224992	CDS	GA	Q	Q	0.73689	0	0	Silent	FBgn0031590	-1	No	-	Located in endomembrane system. Is expressed in adult head and organism. Orthologous to human CLPTM1 (CLPTM1 regulator of GABA type A receptor forward trafficking).	QQHAAQKLEG	2.65173	2.86415	0.942284	2.07609	2.03603	C	T	FALSE	12	93	16.129	50.5833	0.0815972	0	101	20.6238	0	0	0	0	43	6.74419	0	0	0	0	0.73689	0.73689	0	12	12	12	2L	4224992
RpL40	2L:4228231	CDS	GA	M	L	0.502461	0.216652	0.523202	Missense	FBgn0003941	1	No	Ubiquitin-like_dom	Predicted to enable protein tag and ubiquitin protein ligase binding activity. Predicted to be a structural constituent of ribosome. Predicted to be involved in protein ubiquitination and ubiquitin-dependent protein catabolic process. Part of cytosolic large ribosomal subunit. Is expressed in several structures, including Malpighian tubule; adult heart; embryonic/larval digestive system; embryoni…	MVLRLRGGII	12.1664	12.1374	0.69258	11.4574	11.4142	G	A	FALSE	43	62	1398.19	1056.74	0.018385	1	100	1690.89	1117	0	0.0239055	15	28	1246.54	932.4	0.00536096	0.512457	9.60141e-10	0.285809	-931.898	-932.183	42	44	28	2L	4228231
RpL40	2L:4228550	ThreePrimeUTR	TA	-	-	0.386648	0.393371	0.696545	-	FBgn0003941	1	No	-	Predicted to enable protein tag and ubiquitin protein ligase binding activity. Predicted to be a structural constituent of ribosome. Predicted to be involved in protein ubiquitination and ubiquitin-dependent protein catabolic process. Part of cytosolic large ribosomal subunit. Is expressed in several structures, including Malpighian tubule; adult heart; embryonic/larval digestive system; embryoni…		12.1664	12.1374	0.69258	11.4574	11.4142	T	A	FALSE	32	73	66.3562	53.875	0.0367212	31	70	65.2714	67.4194	0.0313179	0.889966	9	34	37.1176	32.2222	0.0625597	0.000249874	5.92364e-05	-0.00672368	-31.8356	-31.8289	1	63	23	2L	4228550
RpL40	2L:4228551	ThreePrimeUTR	TA	-	-	0.382297	0.386534	0.657966	-	FBgn0003941	1	No	-	Predicted to enable protein tag and ubiquitin protein ligase binding activity. Predicted to be a structural constituent of ribosome. Predicted to be involved in protein ubiquitination and ubiquitin-dependent protein catabolic process. Part of cytosolic large ribosomal subunit. Is expressed in several structures, including Malpighian tubule; adult heart; embryonic/larval digestive system; embryoni…		12.1664	12.1374	0.69258	11.4574	11.4142	T	A	FALSE	32	73	64.1644	52.8438	0.0378427	31	70	60.6	70.5161	0.0313829	0.931822	8	35	32.9714	34.25	0.0683769	0.00202594	0.000470442	-0.00423708	-33.8677	-33.8635	1	63	24	2L	4228551
RpL40	2L:4228552	ThreePrimeUTR	TA	-	-	0.386913	0.414278	0.554565	-	FBgn0003941	1	No	-	Predicted to enable protein tag and ubiquitin protein ligase binding activity. Predicted to be a structural constituent of ribosome. Predicted to be involved in protein ubiquitination and ubiquitin-dependent protein catabolic process. Part of cytosolic large ribosomal subunit. Is expressed in several structures, including Malpighian tubule; adult heart; embryonic/larval digestive system; embryoni…		12.1664	12.1374	0.69258	11.4574	11.4142	T	A	FALSE	33	72	60.8611	53.2121	0.0376204	29	72	58.5278	68.7586	0.0321198	0.587567	12	31	29.4194	32.5833	0.0673502	0.0293433	0.0395724	-0.0273648	-32.1964	-32.1691	4	62	21	2L	4228552
tutl	2L:4320666	CDS	CA	P	T	0.73921	0	0	Missense	FBgn0010473	1	No	-	turtle (tutl) encodes an Ig-superfamily transmembrane protein. Its roles include axonal tiling, dendrite self-avoidance, axonal pathfinding and coordinated motor control.	PYTMAHWLEM	4.0959	4.22725	0.910584	0.165688	0.146746	C	A	FALSE	11	94	8.11702	52.5455	0.111043	0	101	14.2772	0	0	0	0	43	3.67442	0	0	0	0	0.73921	0.73921	0	11	11	11	2L	4320666
tutl	2L:4322840	ThreePrimeUTR	AT	-	-	0.75138	0	0	-	FBgn0010473	1	No	-	turtle (tutl) encodes an Ig-superfamily transmembrane protein. Its roles include axonal tiling, dendrite self-avoidance, axonal pathfinding and coordinated motor control.		4.0959	4.22725	0.910584	0.165688	0.146746	A	T	FALSE	12	93	14.1613	48.0833	0.0841295	0	101	27.1386	0	0	0	0	43	3.60465	0	0	0	0	0.75138	0.75138	0	12	12	12	2L	4322840
fipi	2L:4735074	ThreePrimeUTR	TA	-	-	0.5535	0	0	-	FBgn0031627	-1	No	-	Involved in male courtship behavior, veined wing generated song production. Predicted to be active in neuron projection. Is expressed in adult head.		5.70931	5.32823	0.250204	0.307762	0.421432	A	T	FALSE	22	83	46.9759	115.409	0.0415834	0	101	44.5347	0	0	0	0	43	1.53488	0	0	0	0	0.5535	0.5535	0	22	22	22	2L	4735074
fipi	2L:4735376	ThreePrimeUTR	CT	-	-	0.551084	0	0	-	FBgn0031627	-1	No	-	Involved in male courtship behavior, veined wing generated song production. Predicted to be active in neuron projection. Is expressed in adult head.		5.70931	5.32823	0.250204	0.307762	0.421432	G	A	FALSE	24	81	36.8272	104.375	0.0446547	0	101	39.8416	0	0	0	0	43	1.4186	0	0	0	0	0.551084	0.551084	0	24	24	24	2L	4735376
fipi	2L:4738435	CDS	CT	H	H	0.606394	0	0	Silent	FBgn0031627	-1	No	-	Involved in male courtship behavior, veined wing generated song production. Predicted to be active in neuron projection. Is expressed in adult head.	HHESLSLSPA	5.70931	5.32823	0.250204	0.307762	0.421432	G	A	FALSE	23	82	35.5	55.6957	0.0426462	0	101	39.4059	0	0	0	0	43	1.2093	0	0	0	0	0.606394	0.606394	0	23	23	23	2L	4738435
CG15628	2L:4822739	FivePrimeUTR	GA	-	-	0.301437	0.168145	0	-	FBgn0031632	1	No	-	Predicted to enable acyltransferase activity, transferring groups other than amino-acyl groups. Is expressed in several structures, including anterior endoderm anlage; extended germ band embryo; foregut primordium; germ layer; and mesoderm anlage.		5.17327	7.06614	1.92458e-12	0.296797	0.19023	G	A	FALSE	8	97	39.5464	52.375	0.105606	11	90	95.9222	100.909	0.0360879	0.194781	0	43	2.06977	0	0	0	0	0.133292	0.301437	0.168145	-3	19	8	2L	4822739
mRpL28	2L:4974809	CDS	CT	P	L	0.859945	0	0.65222	Missense	FBgn0031660	1	No	-	Predicted to be a structural constituent of ribosome. Predicted to be involved in mitochondrial translation. Predicted to be part of mitochondrial large ribosomal subunit. Is expressed in adult head. Orthologous to human MRPL28 (mitochondrial ribosomal protein L28).	PERQQEVLKE	3.66831	3.29714	0.923105	3.73488	3.71203	C	T	FALSE	11	94	28.383	41.8182	0.07029	0	101	33.2277	0	0	0	2	41	10.5122	27	0.256871	0.298799	0	0.859945	-26.1401	-27	11	11	9	2L	4974809
CG3792	2L:4978071	CDS	GA	V	I	0.722168	0	0.333333	Missense	FBgn0031662	1	No	-	Predicted to be involved in oligosaccharide biosynthetic process. Predicted to be located in membrane. Is expressed in several structures, including adult heart; embryonic central brain neurons; embryonic/larval midgut; embryonic/larval nervous system; and presumptive embryonic/larval system. Human ortholog(s) of this gene implicated in congenital disorder of glycosylation If. Orthologous to huma…	VLNSGLTPMS	3.23458	2.84318	0.597116	2.52776	2.67162	G	A	FALSE	11	94	30.6809	36.0909	0.0829392	0	101	30.1584	0	0	0	1	42	8.35714	15	0	0.205739	0	0.722168	-14.2778	-15	11	11	10	2L	4978071
Rtnl1	2L:5008290	CDS	CA	P	P	0.66086	0	0.454545	Silent	FBgn0053113	-1	No	-	Reticulon-like1 (Rtnl1) encodes a reticulon family member, with predicted intramembrane hairpin domains that can insert into the cytosolic face of the endoplasmic reticulum (ER), thereby curving it and promoting ER tubule formation. It is enriched on tubular ER, including axons and egg chamber fusomes.	PKVEPAKPKV	8.65754	8.22041	0.738348	6.20784	5.95089	G	T	FALSE	23	82	35.7439	63.5217	0.0555532	0	101	50.4059	0	0	0	1	42	10.2857	11	0	0.456447	0	0.66086	-10.3391	-11	23	23	22	2L	5008290
Rtnl1	2L:5009310	CDS	GA	Q	Q	0.616803	0	0.627778	Silent	FBgn0053113	-1	No	-	Reticulon-like1 (Rtnl1) encodes a reticulon family member, with predicted intramembrane hairpin domains that can insert into the cytosolic face of the endoplasmic reticulum (ER), thereby curving it and promoting ER tubule formation. It is enriched on tubular ER, including axons and egg chamber fusomes.	QAQRAYEDSA	8.65754	8.22041	0.738348	6.20784	5.95089	C	T	FALSE	31	74	54.3108	89.4839	0.049452	0	101	71.0495	0	0	0	3	40	10.7	22	0.129129	0.947288	0	0.616803	-21.3832	-22	31	31	28	2L	5009310
SelT	2L:5011196	CDS	AC	R	R	0.59492	0	0.554895	Silent	FBgn0031670	1	No	-	Probably has thioredoxin reductase-like oxidoreductase activity. (UniProtKB:Q9VMV6)	RLTGRNVALL	6.33383	6.84417	0.699678	5.28965	5.24848	A	C	FALSE	27	78	60.3846	93.6667	0.0517467	0	101	83.1782	0	0	0	10	33	20.0606	19.4	0.032656	0.651869	0	0.59492	-18.8051	-19.4	27	27	17	2L	5011196
CG31650	2L:5040833	ThreePrimeUTR	GT	-	-	0.644444	0	0	-	FBgn0031673	-1	No	-	Predicted to enable calcium ion binding activity. Located in endoplasmic reticulum. Is expressed in several structures, including embryonic/larval nervous system; embryonic/larval visceral muscle cell; extended germ band embryo; ventral midline of embryo; and visceral muscle primordium. Orthologous to human RCN2 (reticulocalbin 2).		4.95708	5.02313	0.952346	2.11362	1.73761	C	A	FALSE	26	79	36.2025	46.7692	0.0517968	0	101	43.1881	0	0	0	0	43	8.46512	0	0	0	0	0.644444	0.644444	0	26	26	26	2L	5040833
ND-13A	2L:5100166	FivePrimeUTR	TG	-	-	0.622154	0.848485	0.233333	-	FBgn0031684	-1	No	-	Predicted to be involved in mitochondrial electron transport, NADH to ubiquinone. Predicted to be part of mitochondrial respiratory chain complex I. Is expressed in adult head and adult heart. Human ortholog(s) of this gene implicated in cervical cancer and nuclear type mitochondrial complex I deficiency 9. Orthologous to human NDUFS6 (NADH:ubiquinone oxidoreductase subunit S6).		6.33994	6.41081	0.968898	5.04382	5.21666	A	C	FALSE	16	89	67.2472	48.4375	0.0608437	3	98	72.6429	24.6667	0.151515	0.161393	2	41	24	13.5	0.1	0.0449127	0.0605718	-0.226331	-12.8778	-12.6515	13	19	14	2L	5100166
ND-13A	2L:5100167	FivePrimeUTR	TG	-	-	0.621477	0.848485	0.233333	-	FBgn0031684	-1	No	-	Predicted to be involved in mitochondrial electron transport, NADH to ubiquinone. Predicted to be part of mitochondrial respiratory chain complex I. Is expressed in adult head and adult heart. Human ortholog(s) of this gene implicated in cervical cancer and nuclear type mitochondrial complex I deficiency 9. Orthologous to human NDUFS6 (NADH:ubiquinone oxidoreductase subunit S6).		6.33994	6.41081	0.968898	5.04382	5.21666	A	C	FALSE	16	89	66.3034	48.375	0.0609929	3	98	71.0714	24.6667	0.151515	0.16105	2	41	23.3659	13.5	0.1	0.0456985	0.0605718	-0.227008	-12.8785	-12.6515	13	19	14	2L	5100167
CG14024	2L:5312887	CDS	CA	A	E	0.744385	0.7	0	Missense	FBgn0031697	-1	No	Sulfotransferase	Predicted to enable sulfotransferase activity. Predicted to be involved in carbohydrate biosynthetic process. Predicted to be located in membrane. Orthologous to human CHST9 (carbohydrate sulfotransferase 9).	ALGNKIVHRY	4.1084	4.81184	0.222063	0.0890449	0.126785	G	T	FALSE	13	92	17.2717	46.8462	0.0732641	1	100	32.52	20	0	0.87407	0	43	3.88372	0	0	0	0	0.0443847	0.744385	0.7	12	14	13	2L	5312887
stai	2L:6123841	ThreePrimeUTR	GA	-	-	0.235868	0.255554	0	-	FBgn0266521	1	No	-	stathmin (stai) encodes a tubulin binding protein involved in axo-dendritic transport, gamete generation and synaptic growth at neuromuscular junction.		8.1317	8.80982	0.0832443	1.5928	1.80839	G	A	FALSE	11	94	131.894	92.1818	0.0390461	11	90	171.8	88.8182	0.0526196	0.766939	0	43	7.48837	0	0	0	0	-0.0196863	0.235868	0.255554	0	22	11	2L	6123841
Nhe3	2L:6677991	ThreePrimeUTR	TC	-	-	0.774013	0.79215	0	-	FBgn0028703	-1	No	-	Predicted to enable potassium:proton antiporter activity and sodium:proton antiporter activity. Predicted to be involved in potassium ion transmembrane transport; regulation of intracellular pH; and sodium ion import across plasma membrane. Located in perinuclear region of cytoplasm. Is expressed in adult central nervous system; adult head; and organism. Human ortholog(s) of this gene implicated …		3.56007	3.997	0.544983	0.937678	1.02396	A	G	FALSE	22	83	58.5783	35.4545	0.0564613	16	85	68.2118	32.4375	0.0669284	0.83679	0	43	18.9535	0	0	0	0	-0.0181372	0.774013	0.79215	6	38	22	2L	6677991
Nhe3	2L:6678070	ThreePrimeUTR	CT	-	-	0.734831	0.80932	0	-	FBgn0028703	-1	No	-	Predicted to enable potassium:proton antiporter activity and sodium:proton antiporter activity. Predicted to be involved in potassium ion transmembrane transport; regulation of intracellular pH; and sodium ion import across plasma membrane. Located in perinuclear region of cytoplasm. Is expressed in adult central nervous system; adult head; and organism. Human ortholog(s) of this gene implicated …		3.56007	3.997	0.544983	0.937678	1.02396	G	A	FALSE	21	84	54.9405	33.5714	0.0558533	14	87	64.7356	39.2857	0.0604257	0.383872	0	43	19.2093	0	0	0	0	-0.074489	0.734831	0.80932	7	35	21	2L	6678070
Nhe3	2L:6683793	CDS	CA	L	L	0.739987	0.744906	0	Silent	FBgn0028703	-1	No	Cation/H_exchanger	Predicted to enable potassium:proton antiporter activity and sodium:proton antiporter activity. Predicted to be involved in potassium ion transmembrane transport; regulation of intracellular pH; and sodium ion import across plasma membrane. Located in perinuclear region of cytoplasm. Is expressed in adult central nervous system; adult head; and organism. Human ortholog(s) of this gene implicated …	LTIWLFKHHR	3.56007	3.997	0.544983	0.937678	1.02396	G	T	FALSE	11	94	51	28.5455	0.0772296	11	90	57.6667	30.0909	0.0885097	0.967008	0	43	18.9535	0	0	0	0	-0.00491972	0.739987	0.744906	0	22	11	2L	6683793
nrv2	2L:6790466	ThreePrimeUTR	TC	-	-	0.709668	0.835685	0.564103	-	FBgn0015777	-1	No	-	This is the non-catalytic component of the active enzyme, which catalyzes the hydrolysis of ATP coupled with the exchange of Na(+) and K(+) ions across the plasma membrane. The beta subunit regulates, through assembly of alpha/beta heterodimers, the number of sodium pumps transported to the plasma membrane. (UniProtKB:Q24048)		3.48474	2.11119	0.017969	1.38147	1.80436	A	G	FALSE	30	75	59.2667	48.8	0.0486466	13	88	69.2955	42.8462	0.0736441	0.161501	3	40	29.625	13	0.13568	0.370493	0.127065	-0.126017	-12.2903	-12.1643	17	43	27	2L	6790466
Hrb27C	2L:6926443	ThreePrimeUTR	GA	-	-	0.543375	0.692501	0.532603	-	FBgn0004838	1	No	-	This protein is a component of ribonucleosomes. Could be needed to organize a concentration gradient of a dorsalizing morphogen (Dm) originating in the germinal vesicle. (UniProtKB:P48809)		6.76038	6.82356	0.886055	4.81173	4.59982	G	A	FALSE	31	74	95.2838	73.7419	0.0480482	27	74	80.3649	72.8889	0.0510505	0.0379332	19	24	34	32.5263	0.0269582	0.869258	0.0180199	-0.149127	-31.9829	-31.8338	4	58	12	2L	6926443
Hrb27C	2L:6929081	ThreePrimeUTR	CT	-	-	0.895663	0.622659	0	-	FBgn0004838	1	No	-	This protein is a component of ribonucleosomes. Could be needed to organize a concentration gradient of a dorsalizing morphogen (Dm) originating in the germinal vesicle. (UniProtKB:P48809)		6.76038	6.82356	0.886055	4.81173	4.59982	C	T	FALSE	11	94	24.234	27.2727	0.0539521	5	96	20.3958	48	0.164449	0.0605748	0	43	21.2326	0	0	0	0	0.273004	0.895663	0.622659	6	16	11	2L	6929081
Pcp	2L:7022415	ThreePrimeUTR	TG	-	-	0.640391	0.533691	0.565347	-	FBgn0003046	1	No	-	Component of the cuticle of the pupa of fruit fly. (UniProtKB:P14484)		1.91474	2.27453	0.953641	8.33335	8.8262	T	G	FALSE	8	105	39.5238	156.25	0.116929	12	101	43.198	80.9167	0.0845646	0.457954	21	43	685.163	406.905	0.014407	0.318511	0.634844	0.106699	-406.264	-406.371	-4	20	-13	2L	7022415
Pcp	2L:7022470	ThreePrimeUTR	TA	-	-	0.171429	0.185185	0.517313	-	FBgn0003046	1	No	-	Component of the cuticle of the pupa of fruit fly. (UniProtKB:P14484)		1.91474	2.27453	0.953641	8.33335	8.8262	T	A	FALSE	1	105	17.981	35	0	1	101	21.3564	57	0	0	12	43	36.6279	75.4167	0.0410952	0.0395637	0.0465771	-0.0137566	-75.2452	-75.2315	0	2	-11	2L	7022470
Mnn1	2L:7056469	FivePrimeUTR	GA	-	-	0.729902	0.786949	0.5	-	FBgn0031885	1	No	-	Menin 1 (Mnn1) encodes a protein that regulates the response of several stresses including hypoxia, hyperosmolarity, heat shock, and oxidative stress. It is important during the mitotic G1 DNA damage checkpoint in a process mediated by the product of CHES-1-like.		1.95987	1.86467	0.732157	0.959453	0.75867	G	A	FALSE	10	95	29.4842	37.1	0.0874996	11	90	32.6444	34.8182	0.0723324	0.618613	1	42	10.7143	12	0	0.448616	0.278794	-0.0570478	-11.2701	-11.2131	-1	21	9	2L	7056469
MICU1	2L:7184938	CDS	TC	D	D	0.723105	0.896661	0.230769	Silent	FBgn0031893	1	No	-	Key regulator of mitochondrial calcium uniporter (MCU) that senses calcium level via its EF-hand domains (Probable). During development, required in alpha/beta or gamma mushroom body neurons to support olfactory intermediate-term memory in the adult (PubMed:27568554). (UniProtKB:A2VEI2)	DTALTFYHIA	2.70967	3.10202	0.881422	2.44341	1.96771	T	C	FALSE	12	93	20.6452	30.0833	0.0842596	9	92	24.2717	55.7778	0.0816808	0.165874	1	42	7.59524	13	0	0.133396	0.0327177	-0.173555	-12.2769	-12.1033	3	21	11	2L	7184938
MICU1	2L:7184947	CDS	TG	L	M	0.736792	0.899361	0.230769	Missense	FBgn0031893	1	No	-	Key regulator of mitochondrial calcium uniporter (MCU) that senses calcium level via its EF-hand domains (Probable). During development, required in alpha/beta or gamma mushroom body neurons to support olfactory intermediate-term memory in the adult (PubMed:27568554). (UniProtKB:A2VEI2)	LTFYHIAGAS	2.70967	3.10202	0.881422	2.44341	1.96771	T	G	FALSE	12	93	19.6989	27.0833	0.0774514	9	92	23.5326	49.5556	0.0813387	0.169804	1	42	7.57143	13	0	0.0973381	0.03165	-0.16257	-12.2632	-12.1006	3	21	11	2L	7184947
MICU1	2L:7185190	CDS	GT	V	V	0.824525	0.912525	0	Silent	FBgn0031893	1	No	-	Key regulator of mitochondrial calcium uniporter (MCU) that senses calcium level via its EF-hand domains (Probable). During development, required in alpha/beta or gamma mushroom body neurons to support olfactory intermediate-term memory in the adult (PubMed:27568554). (UniProtKB:A2VEI2)	VQRGLEKPKD	2.70967	3.10202	0.881422	2.44341	1.96771	G	T	FALSE	12	93	23.871	39.0833	0.0732092	7	94	26.3723	65.8571	0.0619917	0.424425	0	43	8.97674	0	0	0	0	-0.0879999	0.824525	0.912525	5	19	12	2L	7185190
CG4502	2L:7204149	FivePrimeUTR	CT	-	-	0.741625	0.765362	0	-	FBgn0031896	-1	No	-	Catalyzes the covalent attachment of ubiquitin to other proteins. (UniProtKB:Q9VM35)		4.43098	5.53606	0.124912	1.17395	0.700742	G	A	FALSE	12	93	27.1398	58.9167	0.0733453	22	79	47.2658	52.6364	0.0563134	0.801355	0	43	5.90698	0	0	0	0	-0.0237368	0.741625	0.765362	-10	34	12	2L	7204149
muc	2L:7429839	CDS	CG	D	E	0.334284	0.606982	0.272894	Missense	FBgn0283658	1	No	2-oxoacid_DH_actylTfrase	Predicted to enable dihydrolipoyllysine-residue acetyltransferase activity. Involved in grooming behavior. Predicted to be located in mitochondrion. Predicted to be part of pyruvate dehydrogenase complex. Is expressed in adult head; adult heart; and spermatozoon. Human ortholog(s) of this gene implicated in pyruvate decarboxylase deficiency. Orthologous to human DLAT (dihydrolipoamide S-acetyltra…	DYMEDPSNMV	4.74482	3.37582	0.364846	4.13376	4.20774	C	G	FALSE	13	92	43.1413	78.2308	0.0479782	9	92	30.8587	23.7778	0.129599	0.0361833	2	41	29.9512	17	0.0347985	0.635976	0.274077	-0.272698	-16.6657	-16.393	4	22	11	2L	7429839
Brd7-9	2L:7783345	CDS	GA	K	K	0.872014	0.914634	0	Silent	FBgn0031947	1	No	-	Predicted to enable lysine-acetylated histone binding activity. Predicted to be involved in regulation of transcription by RNA polymerase II. Part of brahma complex. Is expressed in several structures, including anterior endoderm anlage; embryonic brain; embryonic/larval nervous system; extended germ band embryo; and germ layer. Human ortholog(s) of this gene implicated in acute myeloid leukemia.…	KLILKVGSNA	1.88437	1.65131	0.770118	0.928592	1.01722	G	A	FALSE	12	93	20.0323	33.3333	0.0743926	6	95	24.2	40.1667	0.0853659	0.730922	0	43	9.37209	0	0	0	0	-0.0426199	0.872014	0.914634	6	18	12	2L	7783345
Rack1	2L:7825630	ThreePrimeUTR	TC	-	-	0.237317	0.264006	0.251469	-	FBgn0020618	-1	No	-	Receptor of activated protein kinase C 1 (Rack1) encodes a cytosolic adaptor protein that is essential during development, particularly oogenesis.		11.0143	10.9919	0.822681	10.3093	10.1087	A	G	FALSE	20	85	99.4706	59.15	0.0212071	9	92	103.62	34.3333	0.0308362	0.486125	12	31	54.2258	42.0833	0.0226511	0.666997	0.740691	-0.0266887	-41.846	-41.8193	11	29	8	2L	7825630
Rack1	2L:7825809	CDS	TC	D	D	0.586628	0.538761	0.506726	Silent	FBgn0020618	-1	No	-	Receptor of activated protein kinase C 1 (Rack1) encodes a cytosolic adaptor protein that is essential during development, particularly oogenesis.	DQPQCLSLAW	11.0143	10.9919	0.822681	10.3093	10.1087	A	G	FALSE	60	45	717.867	424.167	0.0279839	32	69	650.739	464.531	0.0179152	0.24109	27	16	484.25	380.037	0.00642867	0.0609146	0.121882	0.0478676	-379.45	-379.498	28	92	33	2L	7825809
Rack1	2L:7825976	CDS	CT	M	M	0.581972	0.524573	0.517657	Silent	FBgn0020618	-1	No	WD40_rpt	Receptor of activated protein kinase C 1 (Rack1) encodes a cytosolic adaptor protein that is essential during development, particularly oogenesis.	MYTLEHNDII	11.0143	10.9919	0.822681	10.3093	10.1087	G	A	FALSE	63	42	1184.26	607.619	0.0262448	32	69	1002.12	665.312	0.0180317	0.145202	27	16	744.812	563.889	0.0070428	0.11568	0.739389	0.0573983	-563.307	-563.364	31	95	36	2L	7825976
Rack1	2L:7826869	CDS	CT	S	S	0.609095	0.539754	0.513502	Silent	FBgn0020618	-1	No	WD40_rpt	Receptor of activated protein kinase C 1 (Rack1) encodes a cytosolic adaptor protein that is essential during development, particularly oogenesis.	SDGNYALSGS	11.0143	10.9919	0.822681	10.3093	10.1087	G	A	FALSE	62	43	884.419	582.5	0.0259474	31	70	807.914	649.387	0.0168908	0.0762372	27	16	436.062	431.889	0.00545606	0.0178994	0.168542	0.069341	-431.28	-431.349	31	93	35	2L	7826869
Rack1	2L:7826967	CDS	GA	V	M	0.590971	0.52303	0.519107	Missense	FBgn0020618	-1	No	WD40_rpt	Receptor of activated protein kinase C 1 (Rack1) encodes a cytosolic adaptor protein that is essential during development, particularly oogenesis.	VWKLTRDEDT	11.0143	10.9919	0.822681	10.3093	10.1087	C	T	FALSE	63	42	735.31	497.333	0.0261052	31	70	668.243	522.452	0.0187473	0.0891249	27	16	396.688	373.222	0.00696651	0.0777145	0.853429	0.0679415	-372.631	-372.699	32	94	36	2L	7826967
Rack1	2L:7827205	FivePrimeUTR	TC	-	-	0.638495	0.585538	0.627228	-	FBgn0020618	-1	No	-	Receptor of activated protein kinase C 1 (Rack1) encodes a cytosolic adaptor protein that is essential during development, particularly oogenesis.		11.0143	10.9919	0.822681	10.3093	10.1087	A	G	FALSE	56	49	647.816	264.536	0.0267407	31	70	640.514	250.452	0.0188788	0.174256	27	16	300.25	177.185	0.0110251	0.775498	0.0717024	0.0529573	-176.547	-176.6	25	87	29	2L	7827205
mts	2L:7831570	CDS	GT	V	V	0.596008	0.461179	0.455153	Silent	FBgn0004177	1	No	-	microtubule star (mts) encodes the catalytic subunit of protein phosphatase 2A. It is involved in various developmental processes and signaling pathways, such as Hh signaling and Wingless signaling.	VVTIFSAPNY	7.65468	7.74516	0.87959	4.87559	4.7749	G	T	FALSE	51	54	124.13	111.941	0.0405576	29	72	144.514	128.207	0.0416769	0.0336333	13	30	28.4333	22.3846	0.0350991	0.0933191	0.928581	0.134829	-21.7886	-21.9234	22	80	38	2L	7831570
mts	2L:7832052	ThreePrimeUTR	AT	-	-	0.710725	0.609438	0.465035	-	FBgn0004177	1	No	-	microtubule star (mts) encodes the catalytic subunit of protein phosphatase 2A. It is involved in various developmental processes and signaling pathways, such as Hh signaling and Wingless signaling.		7.65468	7.74516	0.87959	4.87559	4.7749	A	T	FALSE	26	79	56.7595	49.6538	0.0547945	13	88	53.2727	65.3077	0.0569441	0.25468	2	41	11.8049	23	0.0804196	0.23414	0.358615	0.101287	-22.2893	-22.3906	13	39	24	2L	7832052
mts	2L:7832133	ThreePrimeUTR	AT	-	-	0.693481	0.580641	0.5	-	FBgn0004177	1	No	-	microtubule star (mts) encodes the catalytic subunit of protein phosphatase 2A. It is involved in various developmental processes and signaling pathways, such as Hh signaling and Wingless signaling.		7.65468	7.74516	0.87959	4.87559	4.7749	A	T	FALSE	31	74	35.9459	44.8065	0.0538955	19	82	37.7927	40.5263	0.0647405	0.193242	1	42	9.85714	14	0	0.530489	0.783784	0.11284	-13.3065	-13.4194	12	50	30	2L	7832133
mts	2L:7832142	ThreePrimeUTR	CT	-	-	0.668306	0.582773	0.615385	-	FBgn0004177	1	No	-	microtubule star (mts) encodes the catalytic subunit of protein phosphatase 2A. It is involved in various developmental processes and signaling pathways, such as Hh signaling and Wingless signaling.		7.65468	7.74516	0.87959	4.87559	4.7749	C	T	FALSE	30	75	33.1733	45.2	0.0585243	19	82	36.4512	39.8947	0.0640581	0.344331	1	42	9.61905	13	0	0.87211	0.910627	0.0855326	-12.3317	-12.4172	11	49	29	2L	7832142
Sirup	2L:7999251	CDS	AT	S	C	0.852547	0.503205	0.517722	Missense	FBgn0031971	1	No	-	Starvation-upregulated protein (Sirup) encodes a critical assembly factor for Complex II in the electron transport chain of mitochondria. Loss of Sirup results in motility defects, neurodegeneration, and oxidative stress.	SYLSTSGAWR	5.22088	6.59064	0.00268727	5.49897	6.74555	A	T	FALSE	21	84	135.929	151.81	0.0573595	23	78	279.795	333.87	0.056124	8.55055e-05	13	30	168.867	254.769	0.0493032	0.000309157	0.863154	0.349341	-253.917	-254.266	-2	44	8	2L	7999251
Bsg	2L:8083489	FivePrimeUTR	GA	-	-	0.248705	0.209534	0.214286	-	FBgn0261822	1	No	-	Basigin (Bsg) encodes an IgG family glycoprotein that promotes cytoskeletal rearrangements and lamellipodia formation in cultured insect cells. It contributes to photoreceptor cell morphogenesis, sarcomere organization and spermatid development.		6.77824	7.06161	0.435236	3.81069	3.56629	G	A	FALSE	16	89	391.337	150.75	0.0307696	11	90	419.344	132.636	0.0275138	0.378071	1	42	45.5476	14	0	0.789855	0.961219	0.0391711	-13.7513	-13.7905	5	27	15	2L	8083489
CG7781	2L:8321558	ThreePrimeUTR	GA	-	-	0.277158	0.50858	0	-	FBgn0032021	-1	No	-	Predicted to be involved in positive regulation of voltage-gated potassium channel activity; regulation of cholinergic synaptic transmission; and sleep. Is expressed in adult head.		6.7932	6.02993	0.385496	0.754282	0.71839	C	T	FALSE	11	94	136.511	96.8182	0.0437897	16	85	87.7294	42.8125	0.075271	0.0265488	0	43	8.81395	0	0	0	0	-0.231422	0.277158	0.50858	-5	27	11	2L	8321558
CG7781	2L:8321657	ThreePrimeUTR	TA	-	-	0.560165	0.559949	0	-	FBgn0032021	-1	No	-	Predicted to be involved in positive regulation of voltage-gated potassium channel activity; regulation of cholinergic synaptic transmission; and sleep. Is expressed in adult head.		6.7932	6.02993	0.385496	0.754282	0.71839	A	T	FALSE	19	86	135.791	117.579	0.0512036	12	89	89.5393	77	0.0750528	0.998045	0	43	8.93023	0	0	0	0	0.000216698	0.560165	0.559949	7	31	19	2L	8321657
CG7781	2L:8321739	ThreePrimeUTR	CT	-	-	0.577337	0.550015	0	-	FBgn0032021	-1	No	-	Predicted to be involved in positive regulation of voltage-gated potassium channel activity; regulation of cholinergic synaptic transmission; and sleep. Is expressed in adult head.		6.7932	6.02993	0.385496	0.754282	0.71839	G	A	FALSE	21	84	150.298	112.857	0.0522047	16	85	89.1882	85.9375	0.0586447	0.730637	0	43	8.97674	0	0	0	0	0.0273223	0.577337	0.550015	5	37	21	2L	8321739
CG7781	2L:8322533	CDS	CT	A	A	0.591845	0.625133	0	Silent	FBgn0032021	-1	No	-	Predicted to be involved in positive regulation of voltage-gated potassium channel activity; regulation of cholinergic synaptic transmission; and sleep. Is expressed in adult head.	AMVGLLLSAR	6.7932	6.02993	0.385496	0.754282	0.71839	G	A	FALSE	20	85	126.988	133.7	0.0527287	19	82	80.1951	60.3684	0.0588727	0.675378	0	43	9.04651	0	0	0	0	-0.0332878	0.591845	0.625133	1	39	20	2L	8322533
witty	2L:8338461	CDS	CT	M	M	0.507036	0.687037	0	Silent	FBgn0032023	1	No	-	Is expressed in adult head.	MALLALVSNG	5.00786	4.3695	0.0445176	0.0898243	0.0942114	C	T	FALSE	13	92	81.7174	78.2308	0.0725776	3	98	64.9898	28.3333	0.249286	0.352343	0	43	8.25581	0	0	0	0	-0.180001	0.507036	0.687037	10	16	13	2L	8338461
witty	2L:8341455	ThreePrimeUTR	TG	-	-	0.661441	0.763341	0	-	FBgn0032023	1	No	-	Is expressed in adult head.		5.00786	4.3695	0.0445176	0.0898243	0.0942114	T	G	FALSE	17	88	70.2727	84.7647	0.0739059	7	94	59.7128	29.1429	0.115888	0.465123	0	43	8.32558	0	0	0	0	-0.1019	0.661441	0.763341	10	24	17	2L	8341455
RpS13	2L:8363699	ThreePrimeUTR	CA	-	-	0.470882	0.409242	0.673524	-	FBgn0010265	-1	No	-	Ribosomal protein S13 (RpS13) encodes a structural constituent of ribosomes.		12.5537	12.6411	0.256312	12.0036	11.9644	G	T	FALSE	15	90	61.1667	21	0.0507145	17	84	64.0833	23.5294	0.039167	0.337826	8	35	43.7714	32.125	0.0415207	0.0147036	0.000413172	0.0616399	-31.6541	-31.7158	-2	32	7	2L	8363699
RpS13	2L:8363926	CDS	GT	M	L	0.495785	0.162996	0.462185	Missense	FBgn0010265	-1	No	Ribosomal_uS15	Ribosomal protein S13 (RpS13) encodes a structural constituent of ribosomes.	MVESRIHRLA	12.5537	12.6411	0.256312	12.0036	11.9644	C	A	FALSE	31	74	1560.78	932.806	0.0208271	1	100	1715.48	908	0	0.00833413	1	42	1566.69	835	0	0.77746	0	0.332789	-834.504	-834.837	30	32	30	2L	8363926
Pp2A-29B	2L:8369899	ThreePrimeUTR	AT	-	-	0.840709	0.593761	0.480114	-	FBgn0260439	1	No	-	Protein phosphatase 2A at 29B (Pp2A-29B) encodes the structural A subunit of the trimeric PP2A phosphatase enzyme. It links the catalytic C subunit encoded by mts and a variable regulatory B family subunit, which directs the enzyme to distinct substrates. The roles of Pp2A-29B product include centriole duplication, chromosome segregation, autophagy, axonal transport, growth regulation, and active…		4.7624	4.91284	0.836037	3.05424	2.841	A	T	FALSE	17	88	72.3068	39.1176	0.0517343	16	85	64.6824	57.875	0.0609835	0.00408879	2	41	15.6585	24.5	0.207386	0.0415626	0.548672	0.246947	-23.6593	-23.9062	1	33	15	2L	8369899
CG13384	2L:8386605	CDS	CT	G	G	0.767813	0	0	Silent	FBgn0032036	1	No	AA_transpt_TM	Predicted to enable L-amino acid transmembrane transporter activity. Predicted to be involved in amino acid transmembrane transport. Predicted to be active in vacuolar membrane. Is expressed in adult abdomen; adult head; and adult thorax. Human ortholog(s) of this gene implicated in iminoglycinuria. Orthologous to several human genes including SLC36A1 (solute carrier family 36 member 1); SLC36A2 …	GNIGTGILAM	2.93885	3.45893	0.519469	1.35427	1.30628	C	T	FALSE	11	94	38.0638	23.8182	0.0876384	0	101	42.9802	0	0	0	0	43	8.46512	0	0	0	0	0.767813	0.767813	0	11	11	11	2L	8386605
CG13384	2L:8386629	CDS	AT	A	A	0.772243	0	0	Silent	FBgn0032036	1	No	AA_transpt_TM	Predicted to enable L-amino acid transmembrane transporter activity. Predicted to be involved in amino acid transmembrane transport. Predicted to be active in vacuolar membrane. Is expressed in adult abdomen; adult head; and adult thorax. Human ortholog(s) of this gene implicated in iminoglycinuria. Orthologous to several human genes including SLC36A1 (solute carrier family 36 member 1); SLC36A2 …	AMPDAFKNAG	2.93885	3.45893	0.519469	1.35427	1.30628	A	T	FALSE	11	94	38.4468	23.0909	0.0902133	0	101	43.4554	0	0	0	0	43	8.46512	0	0	0	0	0.772243	0.772243	0	11	11	11	2L	8386629
CG13384	2L:8386890	CDS	CT	C	C	0.847378	0	0	Silent	FBgn0032036	1	No	AA_transpt_TM	Predicted to enable L-amino acid transmembrane transporter activity. Predicted to be involved in amino acid transmembrane transport. Predicted to be active in vacuolar membrane. Is expressed in adult abdomen; adult head; and adult thorax. Human ortholog(s) of this gene implicated in iminoglycinuria. Orthologous to several human genes including SLC36A1 (solute carrier family 36 member 1); SLC36A2 …	CCVYFLFVAL	2.93885	3.45893	0.519469	1.35427	1.30628	C	T	FALSE	11	94	38.6702	23.5455	0.0657672	0	101	44.1782	0	0	0	0	43	8.81395	0	0	0	0	0.847378	0.847378	0	11	11	11	2L	8386890
Akap200	2L:8430755	ThreePrimeUTR	CT	-	-	0.514411	0	0	-	FBgn0027932	1	No	-	A kinase anchor protein 200 (Akap200) encodes a scaffolding protein that contributes to the spatial and temporal regulation of the Protein Kinase A holoenzyme. It regulates the Notch signaling and the organization of the actin cytoskeleton.		7.14929	7.38323	0.779992	2.49923	2.83286	C	T	FALSE	17	88	79.6477	108	0.0706139	0	101	92.7822	0	0	0	0	43	12.2093	0	0	0	0	0.514411	0.514411	0	17	17	17	2L	8430755
Gdi	2L:9494388	CDS	CT	I	I	0.515624	0.541576	0.49328	Silent	FBgn0004868	-1	No	GDP_dissociation_inhibitor	GDP dissociation inhibitor (Gdi) encodes a GDP-dissociation inhibitor.	IPKFLMANGQ	8.05437	8.41484	0.842776	4.8483	4.88893	G	A	FALSE	55	50	167.84	168.545	0.0266305	50	51	188.902	161.02	0.0267911	0.494478	13	30	15.8667	31.6154	0.0334236	0.69796	0.386896	-0.025952	-31.0998	-31.0738	5	105	42	2L	9494388
jp	2L:9548665	ThreePrimeUTR	TA	-	-	0.848901	0.883721	0.451102	-	FBgn0032129	-1	No	-	junctophilin (jp) belongs to a gene family encoding proteins anchored to the endoplasmic reticulum through a transmembrane region. The product of jp contributes to the formation and maintenance of junctional membrane complexes. It serves as a physical bridge between the plasma membrane and the endoplasmic reticulum in excitable cells, allowing the functional crosstalk between ion channels. It is …		1.38812	1.46835	0.906019	4.49803	4.20767	A	T	FALSE	5	100	10.7	41.4	0.132707	3	98	12.6633	24.6667	0.116279	0.865022	11	32	12.7812	18.4545	0.0325184	0.00123708	0.000230073	-0.0348198	-17.6056	-17.5708	2	8	-6	2L	9548665
CG46468	2L:9548665	ThreePrimeUTR	TA	-	-	0.848901	0.883721	0.451102	-	FBgn0287599	-1	No	-	This gene is referred to in FlyBase by the symbol Dmel\CG46468 (FBgn0287599). It is a protein_coding_gene from Dmel. It has one annotated transcript and one polypeptide. Gene sequence location is 2L:9548258..9565438. Its molecular function is unknown. The biological processes in which it is involved are not known. No alleles are reported.							A	T	FALSE	5	100	10.7	41.4	0.132707	3	98	12.6633	24.6667	0.116279	0.865022	11	32	12.7812	18.4545	0.0325184	0.00123708	0.000230073	-0.0348198	-17.6056	-17.5708	2	8	-6	2L	9548665
jp	2L:9549109	ThreePrimeUTR	GT	-	-	0.719865	0.690066	0.438657	-	FBgn0032129	-1	No	-	junctophilin (jp) belongs to a gene family encoding proteins anchored to the endoplasmic reticulum through a transmembrane region. The product of jp contributes to the formation and maintenance of junctional membrane complexes. It serves as a physical bridge between the plasma membrane and the endoplasmic reticulum in excitable cells, allowing the functional crosstalk between ion channels. It is …		1.38812	1.46835	0.906019	4.49803	4.20767	C	A	FALSE	6	99	13.5051	46.8333	0.126655	4	97	14.6289	37.25	0.178941	0.891851	16	27	23.8148	30.3125	0.0264476	0.00391403	0.0193609	0.0297988	-29.5926	-29.6224	2	10	-10	2L	9549109
CG46468	2L:9549109	ThreePrimeUTR	GT	-	-	0.719865	0.690066	0.438657	-	FBgn0287599	-1	No	-	This gene is referred to in FlyBase by the symbol Dmel\CG46468 (FBgn0287599). It is a protein_coding_gene from Dmel. It has one annotated transcript and one polypeptide. Gene sequence location is 2L:9548258..9565438. Its molecular function is unknown. The biological processes in which it is involved are not known. No alleles are reported.							C	A	FALSE	6	99	13.5051	46.8333	0.126655	4	97	14.6289	37.25	0.178941	0.891851	16	27	23.8148	30.3125	0.0264476	0.00391403	0.0193609	0.0297988	-29.5926	-29.6224	2	10	-10	2L	9549109
jp	2L:9549118	ThreePrimeUTR	GA	-	-	0.747436	0.675275	0.441656	-	FBgn0032129	-1	No	-	junctophilin (jp) belongs to a gene family encoding proteins anchored to the endoplasmic reticulum through a transmembrane region. The product of jp contributes to the formation and maintenance of junctional membrane complexes. It serves as a physical bridge between the plasma membrane and the endoplasmic reticulum in excitable cells, allowing the functional crosstalk between ion channels. It is …		1.38812	1.46835	0.906019	4.49803	4.20767	C	T	FALSE	5	100	14.53	46.2	0.155065	4	97	14.7938	39.75	0.189339	0.774229	16	27	24.037	35.375	0.0270352	0.0045975	0.0351311	0.0721612	-34.6276	-34.6997	1	9	-11	2L	9549118
CG46468	2L:9549118	ThreePrimeUTR	GA	-	-	0.747436	0.675275	0.441656	-	FBgn0287599	-1	No	-	This gene is referred to in FlyBase by the symbol Dmel\CG46468 (FBgn0287599). It is a protein_coding_gene from Dmel. It has one annotated transcript and one polypeptide. Gene sequence location is 2L:9548258..9565438. Its molecular function is unknown. The biological processes in which it is involved are not known. No alleles are reported.							C	T	FALSE	5	100	14.53	46.2	0.155065	4	97	14.7938	39.75	0.189339	0.774229	16	27	24.037	35.375	0.0270352	0.0045975	0.0351311	0.0721612	-34.6276	-34.6997	1	9	-11	2L	9549118
Trx2	2L:9615775	ThreePrimeUTR	GT	-	-	0.209259	0.206005	0.3125	-	FBgn0040070	1	No	-	Participates in various redox reactions through the reversible oxidation of its active center dithiol to a disulfide and catalyzes dithiol-disulfide exchange reactions. As a reducing substrate of peroxiredoxin 1, thioredoxin 2 is preferred over thioredoxin 1. (UniProtKB:Q9V429)		9.69634	9.67944	0.851976	5.15857	5.52398	G	T	FALSE	14	91	375.11	364.429	0.0225121	18	83	392.169	357.722	0.0242403	0.924249	1	42	26.7619	16	0	0.25757	0.327638	0.00325374	-15.7907	-15.794	-4	32	13	2L	9615775
Nckx30C	2L:9716129	ThreePrimeUTR	AT	-	-	0.44874	0.396226	0	-	FBgn0028704	-1	No	-	May function in the removal and maintenance of calcium homeostasis during signaling in the adult and in signaling events during embryogenesis and patterning of imaginal disks. Transports one Ca(2+) and 1 K(+) in exchange for 4 Na(+). (UniProtKB:Q9U6A0)		4.99389	4.09503	0.0412382	0.0832012	0.108464	T	A	FALSE	16	89	17.764	17.875	0.0710176	1	100	17.91	53	0	0.860069	0	43	4.44186	0	0	0	0	0.0525139	0.44874	0.396226	15	17	16	2L	9716129
RpL7	2L:10201284	CDS	GA	E	K	0.129356	0.159583	0	Missense	FBgn0005593	1	No	Ribosomal_uL30_N_euk	Binds to G-rich structures in 28S rRNA and in mRNAs. Plays a regulatory role in the translation apparatus; inhibits cell-free translation of mRNAs (By similarity). (UniProtKB:P32100)	ESKLKFSKKQ	11.7293	11.7697	0.664372	11.1406	10.9857	G	A	FALSE	14	91	1020.63	526.5	0.00761847	12	89	889.213	679.5	0.0336146	0.355642	0	43	654.837	0	0	0	0	-0.0302269	0.129356	0.159583	2	26	14	2L	10201284
RpL7	2L:10202147	ThreePrimeUTR	CA	-	-	0.160005	0.192919	0.3999	-	FBgn0005593	1	No	-	Binds to G-rich structures in 28S rRNA and in mRNAs. Plays a regulatory role in the translation apparatus; inhibits cell-free translation of mRNAs (By similarity). (UniProtKB:P32100)		11.7293	11.7697	0.664372	11.1406	10.9857	C	A	FALSE	21	84	89.5	63.5714	0.00968726	22	79	80.8354	54.0909	0.0195548	0.144907	13	30	61.2667	55.9231	0.0351964	4.2336e-09	3.24709e-06	-0.0329133	-55.7631	-55.7302	-1	43	8	2L	10202147
RpL7	2L:10202148	ThreePrimeUTR	GA	-	-	0.163369	0.189339	0.441087	-	FBgn0005593	1	No	-	Binds to G-rich structures in 28S rRNA and in mRNAs. Plays a regulatory role in the translation apparatus; inhibits cell-free translation of mRNAs (By similarity). (UniProtKB:P32100)		11.7293	11.7697	0.664372	11.1406	10.9857	G	A	FALSE	23	82	88.7805	66.3478	0.00994516	28	73	80.3151	57.6429	0.0121795	0.115137	14	29	61.3103	54.1429	0.0329516	1.68391e-11	8.08579e-11	-0.0259698	-53.9795	-53.9535	-5	51	9	2L	10202148
RpL7	2L:10202164	ThreePrimeUTR	CA	-	-	0.212944	0.283219	0.515873	-	FBgn0005593	1	No	-	Binds to G-rich structures in 28S rRNA and in mRNAs. Plays a regulatory role in the translation apparatus; inhibits cell-free translation of mRNAs (By similarity). (UniProtKB:P32100)		11.7293	11.7697	0.664372	11.1406	10.9857	C	A	FALSE	11	94	33.2979	40.4545	0.0267837	9	92	29.25	30.8889	0.0487005	0.20092	3	40	13.4	24	0.159324	0.0057743	0.0808699	-0.0702746	-23.7871	-23.7168	2	20	8	2L	10202164
bsk	2L:10248296	CDS	GA	V	M	0.33993	0.299499	0	Missense	FBgn0000229	-1	No	Prot_kinase_dom	basket (bsk) encodes a serine/threonine-protein kinase, a key component of JNK pathway that phosphorylates the transcription factor encoded by Jra. Its roles include regulation of cell shape and stress response.	VDIWSVGCIM	6.78274	7.07423	0.86328	2.64397	2.18562	C	T	FALSE	7	98	76.7959	100.143	0.116949	12	89	91.6742	105	0.0713148	0.757312	0	43	6.13953	0	0	0	0	0.0404311	0.33993	0.299499	-5	19	7	2L	10248296
CG31717	2L:10251442	CDS	GA	E	K	0.32694	0.308024	0.145614	Missense	FBgn0051717	1	No	-	Predicted to enable sphingosine-1-phosphate phosphatase activity. Predicted to be involved in phospholipid dephosphorylation. Predicted to be active in membrane. Is expressed in adult head. Orthologous to human PLPP6 (phospholipid phosphatase 6) and PLPP7 (phospholipid phosphatase 7 (inactive)).	ETAFSIVGFV	6.16276	6.94588	0.0485892	6.29343	5.52658	G	A	FALSE	4	101	63.2277	125.75	0.0311002	13	88	106.864	99	0.0634491	0.874853	2	41	45.7073	34	0.0122807	0.0185011	0.348504	0.0189161	-33.6731	-33.692	-9	17	2	2L	10251442
CG31717	2L:10251478	CDS	GA	E	K	0.399164	0.217298	0	Missense	FBgn0051717	1	No	-	Predicted to enable sphingosine-1-phosphate phosphatase activity. Predicted to be involved in phospholipid dephosphorylation. Predicted to be active in membrane. Is expressed in adult head. Orthologous to human PLPP6 (phospholipid phosphatase 6) and PLPP7 (phospholipid phosphatase 7 (inactive)).	ETVDSME*	6.16276	6.94588	0.0485892	6.29343	5.52658	G	A	FALSE	13	92	62.2935	78.6923	0.0761976	10	91	96.5055	146.8	0.039102	0.0659556	0	43	45.2326	0	0	0	0	0.181866	0.399164	0.217298	3	23	13	2L	10251478
CG31717	2L:10251648	ThreePrimeUTR	GA	-	-	0.471025	0.336204	0.141301	-	FBgn0051717	1	No	-	Predicted to enable sphingosine-1-phosphate phosphatase activity. Predicted to be involved in phospholipid dephosphorylation. Predicted to be active in membrane. Is expressed in adult head. Orthologous to human PLPP6 (phospholipid phosphatase 6) and PLPP7 (phospholipid phosphatase 7 (inactive)).		6.16276	6.94588	0.0485892	6.29343	5.52658	G	A	FALSE	11	94	39.8617	89.4545	0.0900103	11	90	67	83.2727	0.0509593	0.207231	2	41	25.2927	86.5	0.00684718	0.160012	0.143991	0.134821	-86.029	-86.1638	0	22	9	2L	10251648
CG5056	2L:10367133	CDS	TC	F	F	0.856903	0.902651	0	Silent	FBgn0032231	1	No	-	Predicted to be involved in cellular response to hydrogen peroxide. Is expressed in organism. Orthologous to human OSER1 (oxidative stress responsive serine rich 1).	FEIVSPLSCS	2.9962	3.45852	0.899746	2.70457	2.28498	T	C	FALSE	18	87	26.908	34.0556	0.0628085	15	86	27.0465	27.4667	0.0509904	0.586088	0	43	14.1163	0	0	0	0	-0.0457474	0.856903	0.902651	3	33	18	2L	10367133
CG5056	2L:10367136	CDS	GA	E	E	0.854854	0.902607	0	Silent	FBgn0032231	1	No	-	Predicted to be involved in cellular response to hydrogen peroxide. Is expressed in organism. Orthologous to human OSER1 (oxidative stress responsive serine rich 1).	EIVSPLSCSH	2.9962	3.45852	0.899746	2.70457	2.28498	G	A	FALSE	18	87	26.954	34.2222	0.0638944	15	86	27.093	27.6	0.0510142	0.574449	0	43	14.1163	0	0	0	0	-0.0477527	0.854854	0.902607	3	33	18	2L	10367136
CG5056	2L:10367236	CDS	TA	S	T	0.869311	0.823788	0	Missense	FBgn0032231	1	No	-	Predicted to be involved in cellular response to hydrogen peroxide. Is expressed in organism. Orthologous to human OSER1 (oxidative stress responsive serine rich 1).	SLYGCEHGKW	2.9962	3.45852	0.899746	2.70457	2.28498	T	A	FALSE	18	87	27.8851	37.1667	0.0571935	15	86	26.9419	34	0.0639155	0.598683	0	43	14.6744	0	0	0	0	0.0455231	0.869311	0.823788	3	33	18	2L	10367236
CG5056	2L:10367257	CDS	GA	G	S	0.897017	0.856459	0	Missense	FBgn0032231	1	No	-	Predicted to be involved in cellular response to hydrogen peroxide. Is expressed in organism. Orthologous to human OSER1 (oxidative stress responsive serine rich 1).	GKWIVRSGRI	2.9962	3.45852	0.899746	2.70457	2.28498	G	A	FALSE	17	88	28.1818	35.6471	0.0559373	15	86	26.5698	31.6667	0.0593038	0.622548	0	43	14.5814	0	0	0	0	0.0405584	0.897017	0.856459	2	32	17	2L	10367257
CG33303	2L:10374282	ThreePrimeUTR	TA	-	-	0.641245	0.766168	0.532895	-	FBgn0053303	-1	No	-	Predicted to be involved in protein N-linked glycosylation via asparagine. Located in endomembrane system. Is expressed in adult heart. Orthologous to human RPN1 (ribophorin I).		4.82255	3.93282	0.505552	2.43097	2.84372	A	T	FALSE	44	61	29.377	37.7955	0.0424612	33	68	26.9265	29.4848	0.0478167	0.0553492	2	41	13.6098	15.5	0.217105	0.59813	0.25365	-0.124923	-14.8588	-14.7338	11	77	42	2L	10374282
CG33303	2L:10374508	CDS	TC	D	D	0.635775	0.748779	0.545388	Silent	FBgn0053303	-1	No	Ribophorin_I	Predicted to be involved in protein N-linked glycosylation via asparagine. Located in endomembrane system. Is expressed in adult heart. Orthologous to human RPN1 (ribophorin I).	DTIGRPVVSF	4.82255	3.93282	0.505552	2.43097	2.84372	A	G	FALSE	49	56	39.0357	51.7755	0.0416445	37	64	32.5156	44.3243	0.0480432	0.0790266	8	35	14.1143	19.625	0.0434502	0.393888	0.0617492	-0.113004	-18.9892	-18.8762	12	86	41	2L	10374508
CG33303	2L:10374631	CDS	CT	D	D	0.690526	0.724652	0.543436	Silent	FBgn0053303	-1	No	Ribophorin_I	Predicted to be involved in protein N-linked glycosylation via asparagine. Located in endomembrane system. Is expressed in adult heart. Orthologous to human RPN1 (ribophorin I).	DNMAIDEATI	4.82255	3.93282	0.505552	2.43097	2.84372	G	A	FALSE	45	60	39.4333	58.4667	0.0418525	34	67	30.6866	52.4118	0.0516015	0.605475	7	36	14.7778	18.5714	0.0762964	0.19003	0.137417	-0.0341265	-17.8809	-17.8468	11	79	38	2L	10374631
CG33303	2L:10374757	CDS	CT	R	R	0.642456	0.749815	0.574311	Silent	FBgn0053303	-1	No	Ribophorin_I	Predicted to be involved in protein N-linked glycosylation via asparagine. Located in endomembrane system. Is expressed in adult heart. Orthologous to human RPN1 (ribophorin I).	RFPLFGGWKT	4.82255	3.93282	0.505552	2.43097	2.84372	G	A	FALSE	41	64	34.0469	55.2439	0.0455727	30	71	29.7887	48.4333	0.046884	0.11207	5	38	14.6053	18.4	0.065513	0.612143	0.149285	-0.107359	-17.7575	-17.6502	11	71	36	2L	10374757
CG33303	2L:10374889	CDS	GC	A	A	0.659834	0.757821	0.610902	Silent	FBgn0053303	-1	No	Ribophorin_I	Predicted to be involved in protein N-linked glycosylation via asparagine. Located in endomembrane system. Is expressed in adult heart. Orthologous to human RPN1 (ribophorin I).	AALKSYKTYL	4.82255	3.93282	0.505552	2.43097	2.84372	C	G	FALSE	40	65	31.4462	48.4	0.0430007	31	70	27.3429	49.6129	0.0447827	0.123147	2	41	14.3171	16.5	0.0319549	0.802799	0.418164	-0.0979875	-15.8402	-15.7422	9	71	38	2L	10374889
CG33303	2L:10374901	CDS	CG	R	R	0.663101	0.75138	0.65306	Silent	FBgn0053303	-1	No	Ribophorin_I	Predicted to be involved in protein N-linked glycosylation via asparagine. Located in endomembrane system. Is expressed in adult heart. Orthologous to human RPN1 (ribophorin I).	RSGLAALKSY	4.82255	3.93282	0.505552	2.43097	2.84372	G	C	FALSE	42	63	31.6508	55.881	0.0417295	33	68	27.7206	54.6667	0.0426413	0.148036	4	39	14.2308	16	0.0136065	0.941763	0.433465	-0.088279	-15.3369	-15.2486	9	75	38	2L	10374901
CG33303	2L:10375153	CDS	TC	V	A	0.678961	0.688188	0.535606	Missense	FBgn0053303	-1	No	Ribophorin_I	Predicted to be involved in protein N-linked glycosylation via asparagine. Located in endomembrane system. Is expressed in adult heart. Orthologous to human RPN1 (ribophorin I).	VEAFSQEPLV	4.82255	3.93282	0.505552	2.43097	2.84372	A	G	FALSE	45	60	32.85	69.7778	0.042799	34	67	27.3433	69.8235	0.0507616	0.889366	3	40	13.05	26.6667	0.0468371	0.397177	0.385147	-0.00922707	-25.9877	-25.9785	11	79	42	2L	10375153
CG33303	2L:10375194	CDS	GA	S	S	0.714609	0.746588	0.459048	Silent	FBgn0053303	-1	No	Ribophorin_I	Predicted to be involved in protein N-linked glycosylation via asparagine. Located in endomembrane system. Is expressed in adult heart. Orthologous to human RPN1 (ribophorin I).	SVSSNKITLG	4.82255	3.93282	0.505552	2.43097	2.84372	C	T	FALSE	39	66	33.6818	50.8462	0.0448334	30	71	25.7042	50.8333	0.0480282	0.630855	3	40	12.975	21.6667	0.107508	0.130186	0.0761338	-0.0319793	-20.9521	-20.9201	9	69	36	2L	10375194
CG33303	2L:10375197	CDS	TC	F	F	0.707782	0.750081	0.489948	Silent	FBgn0053303	-1	No	Ribophorin_I	Predicted to be involved in protein N-linked glycosylation via asparagine. Located in endomembrane system. Is expressed in adult heart. Orthologous to human RPN1 (ribophorin I).	FSVSSNKITL	4.82255	3.93282	0.505552	2.43097	2.84372	A	G	FALSE	38	67	33.7761	51.9474	0.0460893	30	71	25.7324	51.5	0.0471889	0.528223	3	40	12.875	21.6667	0.0659842	0.198907	0.0978213	-0.0422989	-20.9589	-20.9166	8	68	35	2L	10375197
CG33303	2L:10375320	CDS	CT	D	D	0.719241	0.720923	0.526316	Silent	FBgn0053303	-1	No	Ribophorin_I	Predicted to be involved in protein N-linked glycosylation via asparagine. Located in endomembrane system. Is expressed in adult heart. Orthologous to human RPN1 (ribophorin I).	DKQFVKYTGN	4.82255	3.93282	0.505552	2.43097	2.84372	G	A	FALSE	38	67	33.5821	52.4737	0.0425218	30	71	26.1127	55.2667	0.0476632	0.979076	1	42	14.5714	19	0	0.472095	0.469249	-0.00168239	-18.2808	-18.2791	8	68	37	2L	10375320
CG33303	2L:10375492	CDS	AC	D	A	0.700924	0.716823	0.697802	Missense	FBgn0053303	-1	No	Ribophorin_I	Predicted to be involved in protein N-linked glycosylation via asparagine. Located in endomembrane system. Is expressed in adult heart. Orthologous to human RPN1 (ribophorin I).	DVKDASDKSV	4.82255	3.93282	0.505552	2.43097	2.84372	T	G	FALSE	36	69	33.1884	50.4167	0.0495014	29	72	25.4722	51.2759	0.0523253	0.826998	2	41	13.0244	13.5	0.159341	0.988467	0.926611	-0.0158992	-12.7991	-12.7832	7	65	34	2L	10375492
dpr19	2L:10379435	ThreePrimeUTR	CT	-	-	0.879877	0.931034	0	-	FBgn0032233	1	No	-	Involved in synapse organization. Predicted to be located in plasma membrane. Predicted to be active in neuron projection membrane.		2.08076	1.54845	0.657339	0.00961757	0.0401844	C	T	FALSE	13	92	23.8478	23.7692	0.0653089	4	97	25.0206	21.25	0.0689655	0.689265	0	43	12.1628	0	0	0	0	-0.0511571	0.879877	0.931034	9	17	13	2L	10379435
Mdh1	2L:10394275	CDS	GA	E	K	0.200273	0.451566	0.272727	Missense	FBgn0262782	-1	No	Lactate/malate_DH_C	Malate dehydrogenase 1 (Mdh1) encodes a L-malate dehydrogenase involved in the interconversion of malate and oxaloacetate.	ETVQKRGAAV	6.50861	5.07872	0.609801	8.57684	8.80841	C	T	FALSE	13	92	96.5978	218.615	0.0298645	6	95	75.1263	187.667	0.174221	0.0562253	1	42	266.333	11	0	0.528938	0.713998	-0.251293	-10.7997	-10.5484	7	19	12	2L	10394275
Ip259	2L:10409446	CDS	GT	G	V	0.308372	0.368745	0.227273	Missense	FBgn0025366	1	No	Ribosomal_Se8/biogenesis_NSA2	Predicted to be involved in maturation of 5.8S rRNA and maturation of LSU-rRNA. Predicted to be part of preribosome, large subunit precursor. Is expressed in several structures, including embryonic/larval muscle system; endoderm anlage; germ layer; germ layer derivative; and gut section. Orthologous to human NSA2 (NSA2 ribosome biogenesis factor).	GLVTQTGKVV	7.90786	7.59279	0.60398	5.90979	5.66533	G	T	FALSE	19	105	2361.23	79.4737	0.0517591	11	101	2135.06	79.0909	0.0605221	0.468957	1	43	1901.7	23	0	0.730134	0.515108	-0.060373	-22.6916	-22.6313	8	30	18	2L	10409446
salr	2L:11359194	FivePrimeUTR	GA	-	-	0.746313	0.665625	0	-	FBgn0000287	1	No	-	spalt-related (salr) encodes a zinc finger transcriptional repressor that, together with the product of salm, mediates most dpp functions during development of the central part of the wing. It is repressed by the product of Ubx during haltere development.		3.36969	2.9991	0.771618	0.202178	0.0214256	G	A	FALSE	29	76	74.8026	46.1379	0.0472677	22	79	57.7089	78.0455	0.0524035	0.260749	0	43	5.34884	0	0	0	0	0.0806886	0.746313	0.665625	7	51	29	2L	11359194
salr	2L:11373140	CDS	GT	E	D	0.767133	0.755104	0	Missense	FBgn0000287	1	No	-	spalt-related (salr) encodes a zinc finger transcriptional repressor that, together with the product of salm, mediates most dpp functions during development of the central part of the wing. It is repressed by the product of Ubx during haltere development.	EDHAETDATG	3.36969	2.9991	0.771618	0.202178	0.0214256	G	T	FALSE	15	90	46.5444	39.2667	0.0764789	12	89	43.7303	64.5833	0.0789296	0.914505	0	43	5.30233	0	0	0	0	0.0120294	0.767133	0.755104	3	27	15	2L	11373140
salr	2L:11373146	CDS	CG	H	Q	0.76126	0.780513	0	Missense	FBgn0000287	1	No	-	spalt-related (salr) encodes a zinc finger transcriptional repressor that, together with the product of salm, mediates most dpp functions during development of the central part of the wing. It is repressed by the product of Ubx during haltere development.	HAETDATGGD	3.36969	2.9991	0.771618	0.202178	0.0214256	C	G	FALSE	15	90	47.3	46.4	0.0730363	13	88	44.3295	69.4615	0.0750424	0.856025	0	43	5.37209	0	0	0	0	-0.0192525	0.76126	0.780513	2	28	15	2L	11373146
salr	2L:11373158	CDS	TG	D	E	0.777752	0.804292	0	Missense	FBgn0000287	1	No	-	spalt-related (salr) encodes a zinc finger transcriptional repressor that, together with the product of salm, mediates most dpp functions during development of the central part of the wing. It is repressed by the product of Ubx during haltere development.	DATGGDNDES	3.36969	2.9991	0.771618	0.202178	0.0214256	T	G	FALSE	17	88	48.6477	45.0588	0.0672465	12	89	45.4944	71	0.0748154	0.796324	0	43	5.39535	0	0	0	0	-0.0265401	0.777752	0.804292	5	29	17	2L	11373158
salr	2L:11373194	CDS	GA	R	R	0.772908	0.729341	0	Silent	FBgn0000287	1	No	-	spalt-related (salr) encodes a zinc finger transcriptional repressor that, together with the product of salm, mediates most dpp functions during development of the central part of the wing. It is repressed by the product of Ubx during haltere development.	RDAEK*	3.36969	2.9991	0.771618	0.202178	0.0214256	G	A	FALSE	16	89	51.1573	53.625	0.0721263	13	88	45.6932	83.2308	0.0775187	0.684996	0	43	5.53488	0	0	0	0	0.0435669	0.772908	0.729341	3	29	16	2L	11373194
salr	2L:11373210	ThreePrimeUTR	CG	-	-	0.749927	0.721358	0	-	FBgn0000287	1	No	-	spalt-related (salr) encodes a zinc finger transcriptional repressor that, together with the product of salm, mediates most dpp functions during development of the central part of the wing. It is repressed by the product of Ubx during haltere development.		3.36969	2.9991	0.771618	0.202178	0.0214256	C	G	FALSE	18	87	54.3218	52.2778	0.0624542	13	88	47.3068	91.6154	0.0808054	0.778288	0	43	5.55814	0	0	0	0	0.0285682	0.749927	0.721358	5	31	18	2L	11373210
CG31705	2L:11523537	ThreePrimeUTR	TC	-	-	0.742263	0.70722	0.533017	-	FBgn0028490	-1	No	-	Is expressed in adult head; organism; yolk; and yolk nucleus.		4.03693	4.29753	0.767202	4.24038	4.53465	A	G	FALSE	27	78	33.2821	46.1111	0.0553835	28	73	37.6438	57.25	0.0548519	0.654915	17	26	26.8077	34.5294	0.0207091	0.00580346	0.0206695	0.0350424	-33.7871	-33.8222	-1	55	10	2L	11523537
CG31705	2L:11523540	ThreePrimeUTR	GA	-	-	0.725802	0.697267	0.533268	-	FBgn0028490	-1	No	-	Is expressed in adult head; organism; yolk; and yolk nucleus.		4.03693	4.29753	0.767202	4.24038	4.53465	C	T	FALSE	29	76	28.0526	54.3793	0.0534307	28	73	37.2329	56.6429	0.0559077	0.713425	17	26	26.1538	34.6471	0.0189992	0.0100667	0.0310581	0.0285345	-33.9213	-33.9498	1	57	12	2L	11523540
CG31705	2L:11524089	CDS	GA	V	I	0.749453	0.733308	0.578366	Missense	FBgn0028490	-1	No	DUF4813	Is expressed in adult head; organism; yolk; and yolk nucleus.	VAPGSPVAPA	4.03693	4.29753	0.767202	4.24038	4.53465	C	T	FALSE	19	86	17.3721	28.8947	0.065682	18	83	12.1687	39.6667	0.0599095	0.857406	9	34	9.17647	17.5556	0.0377336	0.0980122	0.0956443	0.0161447	-16.8061	-16.8222	1	37	10	2L	11524089
CG31705	2L:11524209	CDS	TC	S	P	0.732454	0.798178	0.597816	Missense	FBgn0028490	-1	No	DUF4813	Is expressed in adult head; organism; yolk; and yolk nucleus.	SQALPVPPAP	4.03693	4.29753	0.767202	4.24038	4.53465	A	G	FALSE	18	87	16.8276	38.0556	0.0623761	18	83	10.9759	47.8333	0.0536748	0.430021	6	37	8.02703	18.3333	0.0759491	0.263622	0.0651441	-0.0657237	-17.6009	-17.5352	0	36	12	2L	11524209
CG31705	2L:11524851	CDS	TA	G	G	0.818568	0.791297	0	Silent	FBgn0028490	-1	No	DUF4813	Is expressed in adult head; organism; yolk; and yolk nucleus.	GASYHPAGQV	4.03693	4.29753	0.767202	4.24038	4.53465	A	T	FALSE	17	88	11.8409	23	0.0631852	14	87	6.48276	39.0714	0.0694112	0.773539	0	43	4.53488	0	0	0	0	0.0272711	0.818568	0.791297	3	31	17	2L	11524851
CG31705	2L:11524947	CDS	CT	H	H	0.812586	0.752291	0	Silent	FBgn0028490	-1	No	DUF4813	Is expressed in adult head; organism; yolk; and yolk nucleus.	HPAGQLPAGA	4.03693	4.29753	0.767202	4.24038	4.53465	G	A	FALSE	13	92	9.55435	23.4615	0.0629436	14	87	5.67816	36.3571	0.073085	0.540413	0	43	3.55814	0	0	0	0	0.0602955	0.812586	0.752291	-1	27	13	2L	11524947
CG31705	2L:11525043	CDS	TA	G	G	0.840363	0.720713	0.578571	Silent	FBgn0028490	-1	No	-	Is expressed in adult head; organism; yolk; and yolk nucleus.	GSSGGYQPIT	4.03693	4.29753	0.767202	4.24038	4.53465	A	T	FALSE	18	87	12.5862	26.2222	0.0492228	16	85	8.63529	37.625	0.0756613	0.185088	2	41	5.17073	14.5	0.221429	0.121244	0.540883	0.119649	-13.6596	-13.7793	2	34	16	2L	11525043
CG31705	2L:11525268	CDS	CA	T	T	0.711013	0.72579	0.517037	Silent	FBgn0028490	-1	No	-	Is expressed in adult head; organism; yolk; and yolk nucleus.	TNIHERPPAY	4.03693	4.29753	0.767202	4.24038	4.53465	G	T	FALSE	16	89	20.0787	28.5625	0.0656085	15	86	10.9419	36.8	0.0800302	0.886826	3	40	8.175	21	0.0501247	0.23122	0.274282	-0.0147769	-20.289	-20.2742	1	31	13	2L	11525268
kek2	2L:11582074	FivePrimeUTR	AC	-	-	0.779054	0.763553	0	-	FBgn0015400	1	No	-	Predicted to be located in plasma membrane. Is expressed in central nervous system; embryonic/larval nervous system; head; presumptive embryonic/larval peripheral nervous system; and ventral midline of embryo.		2.63563	2.29434	0.975751	0.059752	0.0131443	A	C	FALSE	11	94	14.4149	40.0909	0.10072	13	88	12.0568	84.0769	0.0707699	0.89865	0	43	1.02326	0	0	0	0	0.0155009	0.779054	0.763553	-2	24	11	2L	11582074
kek2	2L:11582104	FivePrimeUTR	GA	-	-	0.786466	0.777194	0	-	FBgn0015400	1	No	-	Predicted to be located in plasma membrane. Is expressed in central nervous system; embryonic/larval nervous system; head; presumptive embryonic/larval peripheral nervous system; and ventral midline of embryo.		2.63563	2.29434	0.975751	0.059752	0.0131443	G	A	FALSE	12	93	12.4839	32.5	0.101146	12	89	11	80	0.0733165	0.941507	0	43	1.02326	0	0	0	0	0.0092717	0.786466	0.777194	0	24	12	2L	11582104
kek2	2L:11582201	FivePrimeUTR	GA	-	-	1	0.730441	0	-	FBgn0015400	1	No	-	Predicted to be located in plasma membrane. Is expressed in central nervous system; embryonic/larval nervous system; head; presumptive embryonic/larval peripheral nervous system; and ventral midline of embryo.		2.63563	2.29434	0.975751	0.059752	0.0131443	G	A	FALSE	7	98	23.8265	32.4286	0	12	89	18.0225	104.25	0.0812111	0.0227325	0	43	1.04651	0	0	0	0	0.269559	1	0.730441	-5	19	7	2L	11582201
kek2	2L:11582245	FivePrimeUTR	AC	-	-	0.867025	0.722819	0	-	FBgn0015400	1	No	-	Predicted to be located in plasma membrane. Is expressed in central nervous system; embryonic/larval nervous system; head; presumptive embryonic/larval peripheral nervous system; and ventral midline of embryo.		2.63563	2.29434	0.975751	0.059752	0.0131443	A	C	FALSE	12	93	22	57.0833	0.0775002	13	88	17.125	111.462	0.0741545	0.191847	0	43	1.09302	0	0	0	0	0.144206	0.867025	0.722819	-1	25	12	2L	11582245
CycY	2L:11812342	CDS	TC	I	I	0.794076	0.909744	0	Silent	FBgn0032378	-1	No	-		IIQLGHPPHT	3.19262	3.065	0.519469	1.64804	1.40216	A	G	FALSE	11	94	7.11702	26.4545	0.10664	5	96	7.17708	20.8	0.0747136	0.503052	0	43	1.69767	0	0	0	0	-0.115668	0.794076	0.909744	6	16	11	2L	11812342
CG6766	2L:12039110	CDS	GC	G	A	0.620409	0.795675	0.427273	Missense	FBgn0032398	-1	No	-	Predicted to be involved in retrograde protein transport, ER to cytosol and ubiquitin-dependent ERAD pathway. Located in endomembrane system. Is expressed in several structures, including embryonic brain; embryonic/larval midgut; embryonic/larval muscle system; extended germ band embryo; and mesoderm. Orthologous to human ERLEC1 (endoplasmic reticulum lectin 1).	GVPREVDVKL	4.1349	3.57008	0.504679	2.47451	2.25646	C	G	FALSE	22	83	27.506	31.9545	0.0571787	15	86	19.7209	33.6	0.0702274	0.0603901	2	41	6	13	0.0272727	0.329353	0.0824405	-0.175266	-12.3796	-12.2043	7	37	20	2L	12039110
RpL7-like	2L:12056396	FivePrimeUTR	TA	-	-	0.734961	0.670246	0.580295	-	FBgn0032404	1	No	-	Predicted to enable RNA binding activity. Predicted to be a structural constituent of ribosome. Predicted to be involved in maturation of LSU-rRNA from tricistronic rRNA transcript (SSU-rRNA, 5.8S rRNA, LSU-rRNA). Predicted to be part of cytosolic large ribosomal subunit. Is expressed in adult head and organism. Orthologous to human RPL7L1 (ribosomal protein L7 like 1).		5.14975	5.56099	0.4882	4.25872	4.13646	T	A	FALSE	26	79	60.9747	38.6538	0.0505901	23	78	64.1026	54.913	0.0550766	0.390546	4	39	119.077	12.25	0.077048	0.257079	0.518398	0.0647154	-11.515	-11.5798	3	49	22	2L	12056396
CG34164	2L:12056396	FivePrimeUTR	TA	-	-	0.734961	0.670246	0.580295	-	FBgn0085193	1	No	-	Is expressed in several structures, including anterior endoderm anlage; embryonic/larval midgut; embryonic/larval midgut primordium; and endoderm.		0.0645539	0.0950725	0.738729	0.241322	0.272059	T	A	FALSE	26	79	60.9747	38.6538	0.0505901	23	78	64.1026	54.913	0.0550766	0.390546	4	39	119.077	12.25	0.077048	0.257079	0.518398	0.0647154	-11.515	-11.5798	3	49	22	2L	12056396
RpL7-like	2L:12056632	CDS	AT	N	Y	0.686509	0.613539	0.579412	Missense	FBgn0032404	1	No	-	Predicted to enable RNA binding activity. Predicted to be a structural constituent of ribosome. Predicted to be involved in maturation of LSU-rRNA from tricistronic rRNA transcript (SSU-rRNA, 5.8S rRNA, LSU-rRNA). Predicted to be part of cytosolic large ribosomal subunit. Is expressed in adult head and organism. Orthologous to human RPL7L1 (ribosomal protein L7 like 1).	NHHKFRRAES	5.14975	5.56099	0.4882	4.25872	4.13646	A	T	FALSE	28	77	55	45.7857	0.0450512	26	75	61.84	63.3846	0.0571032	0.316825	3	40	117.275	14.6667	0.0915202	0.456827	0.844966	0.0729698	-13.9802	-14.0531	2	54	25	2L	12056632
CG34164	2L:12056632	FivePrimeUTR	AT	-	-	0.686509	0.613539	0.579412	-	FBgn0085193	1	No	-	Is expressed in several structures, including anterior endoderm anlage; embryonic/larval midgut; embryonic/larval midgut primordium; and endoderm.		0.0645539	0.0950725	0.738729	0.241322	0.272059	A	T	FALSE	28	77	55	45.7857	0.0450512	26	75	61.84	63.3846	0.0571032	0.316825	3	40	117.275	14.6667	0.0915202	0.456827	0.844966	0.0729698	-13.9802	-14.0531	2	54	25	2L	12056632
Pex19	2L:12093853	FivePrimeUTR	AC	-	-	0.700728	0.624395	0.733333	-	FBgn0032407	1	No	-	Predicted to enable peroxisome membrane targeting sequence binding activity. Involved in nervous system development and peroxisome organization. Located in cytosol and peroxisome. Is expressed in several structures, including adult head; embryonic cortex; germ band; posterior midgut primordium; and yolk. Used to study Zellweger syndrome and peroxisome biogenesis disorder 12A. Human ortholog(s) of…		5.52679	4.58011	0.198542	3.35329	3.35545	A	C	FALSE	21	84	34.9167	54.1905	0.0744106	14	87	23.6897	45.2143	0.0803502	0.501704	1	42	14.9286	15	0	0.9265	0.731898	0.076333	-14.2993	-14.3756	7	35	20	2L	12093853
Pex19	2L:12093901	CDS	TC	M	M	0.709458	0.707175	0.7	Silent	FBgn0032407	1	No	-	Predicted to enable peroxisome membrane targeting sequence binding activity. Involved in nervous system development and peroxisome organization. Located in cytosol and peroxisome. Is expressed in several structures, including adult head; embryonic cortex; germ band; posterior midgut primordium; and yolk. Used to study Zellweger syndrome and peroxisome biogenesis disorder 12A. Human ortholog(s) of…	MLDSALQDFD	5.52679	4.58011	0.198542	3.35329	3.35545	T	C	FALSE	13	92	36.1304	40.9231	0.0958657	7	94	23.3936	41.1429	0.101336	0.988098	1	42	14.881	20	0	0.979398	0.98084	0.00228254	-19.2905	-19.2928	6	20	12	2L	12093901
Pex19	2L:12094055	CDS	GA	S	S	0.703598	0.699219	0.581924	Silent	FBgn0032407	1	No	-	Predicted to enable peroxisome membrane targeting sequence binding activity. Involved in nervous system development and peroxisome organization. Located in cytosol and peroxisome. Is expressed in several structures, including adult head; embryonic cortex; germ band; posterior midgut primordium; and yolk. Used to study Zellweger syndrome and peroxisome biogenesis disorder 12A. Human ortholog(s) of…	SDVATNAGPE	5.52679	4.58011	0.198542	3.35329	3.35545	G	A	FALSE	52	53	26.8113	72.9038	0.0424723	32	69	22.6812	58.0312	0.0479002	0.947204	6	37	15.3514	31	0.0733219	0.346375	0.31769	0.0043789	-30.2964	-30.3008	20	84	46	2L	12094055
Pex19	2L:12094069	CDS	AC	N	T	0.709407	0.652086	0.660263	Missense	FBgn0032407	1	No	-	Predicted to enable peroxisome membrane targeting sequence binding activity. Involved in nervous system development and peroxisome organization. Located in cytosol and peroxisome. Is expressed in several structures, including adult head; embryonic cortex; germ band; posterior midgut primordium; and yolk. Used to study Zellweger syndrome and peroxisome biogenesis disorder 12A. Human ortholog(s) of…	NAGPEGSEDP	5.52679	4.58011	0.198542	3.35329	3.35545	A	C	FALSE	51	54	25.8519	70.4314	0.0427158	32	69	19.8696	57.1875	0.0508473	0.397008	4	39	14.5897	35.75	0.0841447	0.752822	0.956279	0.0573208	-35.0406	-35.0979	19	83	47	2L	12094069
Pex19	2L:12094077	CDS	CG	P	A	0.718995	0.681188	0.415477	Missense	FBgn0032407	1	No	-	Predicted to enable peroxisome membrane targeting sequence binding activity. Involved in nervous system development and peroxisome organization. Located in cytosol and peroxisome. Is expressed in several structures, including adult head; embryonic cortex; germ band; posterior midgut primordium; and yolk. Used to study Zellweger syndrome and peroxisome biogenesis disorder 12A. Human ortholog(s) of…	PEGSEDPDAF	5.52679	4.58011	0.198542	3.35329	3.35545	C	G	FALSE	49	56	29.8393	75.6939	0.0432557	33	68	20.5588	61.6364	0.0503471	0.574027	5	38	15	35.8	0.0731566	0.0325913	0.0541024	0.037807	-35.081	-35.1188	16	82	44	2L	12094077
Pex19	2L:12094088	CDS	CT	S	S	0.705786	0.693898	0.459619	Silent	FBgn0032407	1	No	-	Predicted to enable peroxisome membrane targeting sequence binding activity. Involved in nervous system development and peroxisome organization. Located in cytosol and peroxisome. Is expressed in several structures, including adult head; embryonic cortex; germ band; posterior midgut primordium; and yolk. Used to study Zellweger syndrome and peroxisome biogenesis disorder 12A. Human ortholog(s) of…	SEDPDAFFIE	5.52679	4.58011	0.198542	3.35329	3.35545	C	T	FALSE	51	54	24.8148	89.2157	0.0423708	35	66	20.7879	66.5143	0.0474112	0.854217	9	34	15.6471	28.5556	0.0627508	0.022103	0.0228939	0.0118874	-27.8498	-27.8617	16	86	42	2L	12094088
Pex19	2L:12094289	CDS	TA	G	G	0.670495	0.604116	0.875	Silent	FBgn0032407	1	No	Pex19	Predicted to enable peroxisome membrane targeting sequence binding activity. Involved in nervous system development and peroxisome organization. Located in cytosol and peroxisome. Is expressed in several structures, including adult head; embryonic cortex; germ band; posterior midgut primordium; and yolk. Used to study Zellweger syndrome and peroxisome biogenesis disorder 12A. Human ortholog(s) of…	GFKKMAEAAA	5.52679	4.58011	0.198542	3.35329	3.35545	T	A	FALSE	23	82	39.9878	57.7391	0.0670813	13	88	26.5682	52.8462	0.0800885	0.541906	1	42	16.1905	16	0	0.540143	0.383804	0.0663789	-15.3295	-15.3959	10	36	22	2L	12094289
Pex19	2L:12094556	CDS	GA	E	E	0.664746	0.708981	0.506577	Silent	FBgn0032407	1	No	Pex19	Predicted to enable peroxisome membrane targeting sequence binding activity. Involved in nervous system development and peroxisome organization. Located in cytosol and peroxisome. Is expressed in several structures, including adult head; embryonic cortex; germ band; posterior midgut primordium; and yolk. Used to study Zellweger syndrome and peroxisome biogenesis disorder 12A. Human ortholog(s) of…	EGDGNMFLPF	5.52679	4.58011	0.198542	3.35329	3.35545	G	A	FALSE	28	77	43.0649	90.7143	0.0536675	19	82	28.9756	75	0.0616564	0.595035	6	37	17.2973	36	0.0882641	0.209452	0.107738	-0.0442357	-35.3353	-35.291	9	47	22	2L	12094556
Pex19	2L:12094626	CDS	TC	M	M	0.683193	0.670321	0.447917	Silent	FBgn0032407	1	No	Pex19	Predicted to enable peroxisome membrane targeting sequence binding activity. Involved in nervous system development and peroxisome organization. Located in cytosol and peroxisome. Is expressed in several structures, including adult head; embryonic cortex; germ band; posterior midgut primordium; and yolk. Used to study Zellweger syndrome and peroxisome biogenesis disorder 12A. Human ortholog(s) of…	MPSIRELLEK	5.52679	4.58011	0.198542	3.35329	3.35545	T	C	FALSE	29	76	39.5658	59.1034	0.0520712	21	80	27.525	44.0952	0.0626994	0.874677	2	41	17.2195	30	0.114583	0.25508	0.299674	0.0128721	-29.3168	-29.3297	8	50	27	2L	12094626
Pex19	2L:12094682	CDS	CG	D	E	0.67136	0.726408	0.625531	Missense	FBgn0032407	1	No	Pex19	Predicted to enable peroxisome membrane targeting sequence binding activity. Involved in nervous system development and peroxisome organization. Located in cytosol and peroxisome. Is expressed in several structures, including adult head; embryonic cortex; germ band; posterior midgut primordium; and yolk. Used to study Zellweger syndrome and peroxisome biogenesis disorder 12A. Human ortholog(s) of…	DAKLSAEDKE	5.52679	4.58011	0.198542	3.35329	3.35545	C	G	FALSE	26	79	47.6456	93.4231	0.056156	15	86	31.7093	73.4667	0.0650164	0.53976	5	38	16.5263	25.8	0.0741652	0.73341	0.417556	-0.0550481	-25.1286	-25.0736	11	41	21	2L	12094682
Ced-12	2L:12100412	CDS	GA	E	E	0.740208	0.720721	0	Silent	FBgn0032409	1	No	-	Ced-12 (Ced-12) encodes a protein that functions with Dock family members (encoded by mbc or spg) to regulate GTPase activity. It contributes to myoblast fusion, apoptotic cell engulfment, cell migration, and embryonic cellularization.	EDFDTLLSME	1.13941	1.15421	0.868783	0.8923	0.681104	G	A	FALSE	15	90	8.65556	31.4667	0.0865364	3	98	8.84694	22	0.279279	0.932316	0	43	12.0698	0	0	0	0	0.019487	0.740208	0.720721	12	18	15	2L	12100412
Ced-12	2L:12100451	CDS	CT	R	R	0.743453	0.615385	0	Silent	FBgn0032409	1	No	-	Ced-12 (Ced-12) encodes a protein that functions with Dock family members (encoded by mbc or spg) to regulate GTPase activity. It contributes to myoblast fusion, apoptotic cell engulfment, cell migration, and embryonic cellularization.	RLLDTEGVDI	1.13941	1.15421	0.868783	0.8923	0.681104	C	T	FALSE	14	91	8.7033	26.3571	0.0963553	2	99	8.85859	27.5	0.384615	0.659697	0	43	11.8605	0	0	0	0	0.128069	0.743453	0.615385	12	16	14	2L	12100451
Ced-12	2L:12100569	ThreePrimeUTR	TA	-	-	0.714841	1	0	-	FBgn0032409	1	No	-	Ced-12 (Ced-12) encodes a protein that functions with Dock family members (encoded by mbc or spg) to regulate GTPase activity. It contributes to myoblast fusion, apoptotic cell engulfment, cell migration, and embryonic cellularization.		1.13941	1.15421	0.868783	0.8923	0.681104	T	A	FALSE	11	94	10.2766	28.3636	0.104024	2	99	9.16162	26	0	0.283444	0	43	12.2558	0	0	0	0	-0.285159	0.714841	1	9	13	11	2L	12100569
Ced-12	2L:12100645	ThreePrimeUTR	GT	-	-	0.697771	0.79	0	-	FBgn0032409	1	No	-	Ced-12 (Ced-12) encodes a protein that functions with Dock family members (encoded by mbc or spg) to regulate GTPase activity. It contributes to myoblast fusion, apoptotic cell engulfment, cell migration, and embryonic cellularization.		1.13941	1.15421	0.868783	0.8923	0.681104	G	T	FALSE	12	93	8.83871	25.6667	0.101694	4	97	8.57732	20.75	0.21	0.670705	0	43	11.9535	0	0	0	0	-0.0922289	0.697771	0.79	8	16	12	2L	12100645
ThrRS	2L:12105272	CDS	CT	M	M	0.626015	0.500166	0	Silent	FBgn0027081	1	No	-	Predicted to enable aminoacyl-tRNA editing activity and threonine-tRNA ligase activity. Predicted to be involved in threonyl-tRNA aminoacylation. Predicted to be located in mitochondrion. Is expressed in several structures, including anterior endoderm anlage; embryonic/larval digestive system; embryonic/larval muscle system; germ layer; and presumptive embryonic/larval digestive system. Human ort…	MLEMFKYNEF	5.11791	5.14664	0.914631	2.22626	2.05694	C	T	FALSE	20	85	21.6118	32.55	0.0654552	16	85	23.1294	42.125	0.0689609	0.197419	0	43	12.8372	0	0	0	0	0.125849	0.626015	0.500166	4	36	20	2L	12105272
ThrRS	2L:12105826	CDS	CT	P	P	0.652746	0.534754	0.454545	Silent	FBgn0027081	1	No	aa-tRNA-synt_IIb	Predicted to enable aminoacyl-tRNA editing activity and threonine-tRNA ligase activity. Predicted to be involved in threonyl-tRNA aminoacylation. Predicted to be located in mitochondrion. Is expressed in several structures, including anterior endoderm anlage; embryonic/larval digestive system; embryonic/larval muscle system; germ layer; and presumptive embryonic/larval digestive system. Human ort…	PMNCPGHCLI	5.11791	5.14664	0.914631	2.22626	2.05694	C	T	FALSE	39	66	21.9697	38.5385	0.0480626	34	67	18.3881	42.0588	0.04856	0.0897925	1	42	12.6905	11	0	0.518308	0.781836	0.117991	-10.3473	-10.4652	5	73	38	2L	12105826
ThrRS	2L:12106057	CDS	TC	Y	Y	0.605422	0.525086	0.779461	Silent	FBgn0027081	1	No	aa-tRNA-synt_IIb	Predicted to enable aminoacyl-tRNA editing activity and threonine-tRNA ligase activity. Predicted to be involved in threonyl-tRNA aminoacylation. Predicted to be located in mitochondrion. Is expressed in several structures, including anterior endoderm anlage; embryonic/larval digestive system; embryonic/larval muscle system; germ layer; and presumptive embryonic/larval digestive system. Human ort…	YTIFGFSFQL	5.11791	5.14664	0.914631	2.22626	2.05694	T	C	FALSE	42	63	18.3968	56.9048	0.0470344	40	61	17.7377	50.675	0.0424641	0.209959	2	41	12.878	19	0.0387205	0.429276	0.193299	0.0803356	-18.3946	-18.4749	2	82	40	2L	12106057
ThrRS	2L:12106174	CDS	TC	F	F	0.640198	0.529054	0	Silent	FBgn0027081	1	No	aa-tRNA-synt_IIb	Predicted to enable aminoacyl-tRNA editing activity and threonine-tRNA ligase activity. Predicted to be involved in threonyl-tRNA aminoacylation. Predicted to be located in mitochondrion. Is expressed in several structures, including anterior endoderm anlage; embryonic/larval digestive system; embryonic/larval muscle system; germ layer; and presumptive embryonic/larval digestive system. Human ort…	FGMPWKENPG	5.11791	5.14664	0.914631	2.22626	2.05694	T	C	FALSE	41	64	18.9219	42	0.0480242	37	64	15.625	48.2432	0.0444061	0.0955306	0	43	12.9302	0	0	0	0	0.111144	0.640198	0.529054	4	78	41	2L	12106174
ThrRS	2L:12106306	CDS	TC	R	R	0.60224	0.549141	0.772727	Silent	FBgn0027081	1	No	aa-tRNA-synt_IIb	Predicted to enable aminoacyl-tRNA editing activity and threonine-tRNA ligase activity. Predicted to be involved in threonyl-tRNA aminoacylation. Predicted to be located in mitochondrion. Is expressed in several structures, including anterior endoderm anlage; embryonic/larval digestive system; embryonic/larval muscle system; germ layer; and presumptive embryonic/larval digestive system. Human ort…	RFNLSYIADD	5.11791	5.14664	0.914631	2.22626	2.05694	T	C	FALSE	43	62	20.3548	60.8837	0.0447911	42	59	20.2712	55.3333	0.0459076	0.410042	1	42	13.5714	22	0	0.569151	0.461885	0.0530988	-21.3978	-21.4509	1	85	42	2L	12106306
ThrRS	2L:12106330	CDS	CT	D	D	0.65811	0.549524	0.631579	Silent	FBgn0027081	1	No	aa-tRNA-synt_IIb	Predicted to enable aminoacyl-tRNA editing activity and threonine-tRNA ligase activity. Predicted to be involved in threonyl-tRNA aminoacylation. Predicted to be located in mitochondrion. Is expressed in several structures, including anterior endoderm anlage; embryonic/larval digestive system; embryonic/larval muscle system; germ layer; and presumptive embryonic/larval digestive system. Human ort…	DDGEKKRPVI	5.11791	5.14664	0.914631	2.22626	2.05694	C	T	FALSE	45	60	17.7167	51.1778	0.0443138	48	53	16.5283	46.1042	0.0391011	0.0685955	1	42	13.1905	19	0	0.93006	0.76566	0.108585	-18.3419	-18.4505	-3	93	44	2L	12106330
Rab6	2L:12108881	FivePrimeUTR	AT	-	-	0.687408	0.617667	0	-	FBgn0015797	-1	No	-	Rab6 (Rab6) encodes a member of the Rab family, which are small Ras-like GTPases involved in vesicle trafficking. The Rab6 product localizes on late Golgi, and regulates vesicle trafficking within Golgi, post-Golgi, and endosome to Golgi.		5.65149	5.3903	0.997475	2.97474	2.86663	T	A	FALSE	19	86	44.0349	59.8947	0.067084	30	71	43.662	57.2	0.0476419	0.38876	0	43	15.5814	0	0	0	0	0.0697402	0.687408	0.617667	-11	49	19	2L	12108881
SC35	2L:12432324	ThreePrimeUTR	TC	-	-	0.698118	0.779215	0.612331	-	FBgn0265298	-1	No	-	SR family splicing factor SC35 (SC35) encodes a mRNA binding protein that regulates mRNA alternative splicing, the processing of the mRNA 3'-end and the selection of the transcriptional start site.		4.9017	4.50666	0.773754	2.86801	3.138	A	G	FALSE	30	75	44.6533	68.3333	0.0463226	27	74	24.6757	70.037	0.0475668	0.227784	5	38	13.3684	25.8	0.0613497	0.469289	0.155891	-0.0810964	-25.1019	-25.0208	3	57	25	2L	12432324
SC35	2L:12432325	ThreePrimeUTR	TA	-	-	0.695291	0.772777	0.610805	-	FBgn0265298	-1	No	-	SR family splicing factor SC35 (SC35) encodes a mRNA binding protein that regulates mRNA alternative splicing, the processing of the mRNA 3'-end and the selection of the transcriptional start site.		4.9017	4.50666	0.773754	2.86801	3.138	A	T	FALSE	30	75	44.5733	67.4333	0.0468189	27	74	24.5676	69.3704	0.0485645	0.25607	5	38	13.4737	25.8	0.0602587	0.480187	0.175943	-0.0774862	-25.1047	-25.0272	3	57	25	2L	12432325
eRF3	2L:12440848	ThreePrimeUTR	TC	-	-	0.847564	0.763248	0	-	FBgn0020443	1	No	-	eukaryotic translation release factor 3 (eRF3) encodes a GTP-binding protein important in the termination of protein translation.		3.28022	3.17074	0.919731	1.65428	1.51306	T	C	FALSE	16	89	15.5618	32.4375	0.0667777	5	96	14.125	53	0.140569	0.560452	0	43	9.97674	0	0	0	0	0.0843164	0.847564	0.763248	11	21	16	2L	12440848
eRF3	2L:12440870	ThreePrimeUTR	CA	-	-	0.812536	0.722067	0	-	FBgn0020443	1	No	-	eukaryotic translation release factor 3 (eRF3) encodes a GTP-binding protein important in the termination of protein translation.		3.28022	3.17074	0.919731	1.65428	1.51306	C	A	FALSE	16	89	17.809	37.625	0.0696794	9	92	15.8696	39	0.112585	0.477344	0	43	9.95349	0	0	0	0	0.0904689	0.812536	0.722067	7	25	16	2L	12440870
eRF3	2L:12440875	ThreePrimeUTR	CT	-	-	0.835413	0.760503	0	-	FBgn0020443	1	No	-	eukaryotic translation release factor 3 (eRF3) encodes a GTP-binding protein important in the termination of protein translation.		3.28022	3.17074	0.919731	1.65428	1.51306	C	T	FALSE	17	88	17.5455	36.1176	0.0636907	10	91	15.3187	35.7	0.10353	0.519371	0	43	9.90698	0	0	0	0	0.0749102	0.835413	0.760503	7	27	17	2L	12440875
eRF3	2L:12440945	ThreePrimeUTR	AT	-	-	0.864149	0.731629	0	-	FBgn0020443	1	No	-	eukaryotic translation release factor 3 (eRF3) encodes a GTP-binding protein important in the termination of protein translation.		3.28022	3.17074	0.919731	1.65428	1.51306	A	T	FALSE	21	84	18.2024	28.619	0.0428267	11	90	13.5667	28.7273	0.0992151	0.162318	0	43	9.93023	0	0	0	0	0.132519	0.864149	0.731629	10	32	21	2L	12440945
eRF3	2L:12441088	ThreePrimeUTR	AT	-	-	0.856605	0.81257	0	-	FBgn0020443	1	No	-	eukaryotic translation release factor 3 (eRF3) encodes a GTP-binding protein important in the termination of protein translation.		3.28022	3.17074	0.919731	1.65428	1.51306	A	T	FALSE	15	90	18.5667	31	0.0551144	11	90	14	29.0909	0.0962816	0.676709	0	43	10.093	0	0	0	0	0.0440348	0.856605	0.81257	4	26	15	2L	12441088
bun	2L:12456418	ThreePrimeUTR	GA	-	-	0.810534	0.788971	0.41958	-	FBgn0259176	-1	No	-	Probable transcription factor required for peripheral nervous system morphogenesis, eye development and oogenesis. May be required for the transmission of the dpp signal and for a morphogenetic movement of the medulla in the brain that reorients the second optic lobe relative to the first. Plays a role in determining proper dorsal cell fates leading to the formation of the dorsal appendages. (Uni…		6.94439	6.97053	0.809548	5.18377	5.42671	C	T	FALSE	16	89	17.6517	36.75	0.0569701	16	85	18.0118	30.25	0.0573525	0.791494	2	41	14.0732	12	0.034965	0.0313844	0.0417071	0.021563	-11.1895	-11.211	0	32	14	2L	12456418
bun	2L:12456951	ThreePrimeUTR	GA	-	-	0.198424	0.297231	0	-	FBgn0259176	-1	No	-	Probable transcription factor required for peripheral nervous system morphogenesis, eye development and oogenesis. May be required for the transmission of the dpp signal and for a morphogenetic movement of the medulla in the brain that reorients the second optic lobe relative to the first. Plays a role in determining proper dorsal cell fates leading to the formation of the dorsal appendages. (Uni…		6.94439	6.97053	0.809548	5.18377	5.42671	C	T	FALSE	14	91	132.33	96.3571	0.0342813	3	98	100.031	144.333	0.146852	0.320872	0	43	45.8837	0	0	0	0	-0.0988073	0.198424	0.297231	11	17	14	2L	12456951
bun	2L:12540793	FivePrimeUTR	TA	-	-	0.696507	0.705435	0.411765	-	FBgn0259176	-1	No	-	Probable transcription factor required for peripheral nervous system morphogenesis, eye development and oogenesis. May be required for the transmission of the dpp signal and for a morphogenetic movement of the medulla in the brain that reorients the second optic lobe relative to the first. Plays a role in determining proper dorsal cell fates leading to the formation of the dorsal appendages. (Uni…		6.94439	6.97053	0.809548	5.18377	5.42671	A	T	FALSE	12	93	18.7849	52.4167	0.0822906	16	85	24.3765	41.625	0.0714474	0.935355	1	42	5.85714	17	0	0.357832	0.334626	-0.00892852	-16.3035	-16.2946	-4	28	11	2L	12540793
Ube4B	2L:13013738	CDS	CT	N	N	0.795873	0.704389	0.466998	Silent	FBgn0032467	-1	No	Ubox_domain	Predicted to enable ubiquitin-ubiquitin ligase activity. Predicted to be involved in protein polyubiquitination and ubiquitin-dependent ERAD pathway. Predicted to be part of ubiquitin ligase complex. Predicted to be active in cytoplasm and nucleus. Is expressed in adult head; organism; and spermatozoon. Orthologous to human UBE4B (ubiquitination factor E4B).	NSCTDPFNRQ	1.90835	3.12037	0.00118311	2.96006	2.28446	G	A	FALSE	6	99	11.2525	33.6667	0.105886	16	85	24.2235	77.5	0.0646295	0.468719	9	34	19.1765	34.8889	0.0331174	0.00398149	0.0150532	0.0914836	-34.093	-34.1845	-10	22	-3	2L	13013738
CG9932	2L:13059791	FivePrimeUTR	TC	-	-	0.735223	0.881512	0.499238	-	FBgn0262160	-1	No	-	Predicted to enable DNA-binding transcription repressor activity, RNA polymerase II-specific and RNA polymerase II cis-regulatory region sequence-specific DNA binding activity. Predicted to be involved in negative regulation of transcription by RNA polymerase II. Predicted to be active in nucleus. Is expressed in embryonic/larval fat body; organism; and yolk nucleus. Human ortholog(s) of this gen…		1.71383	1.76726	0.507386	1.89731	1.97145	A	G	FALSE	13	92	6.76087	37.5385	0.0763104	8	93	10.8925	28.875	0.0478731	0.179513	6	37	11.4324	15	0.067319	0.0705874	0.000456644	-0.146289	-14.2648	-14.1185	5	21	7	2L	13059791
CG16974	2L:13185138	ThreePrimeUTR	GA	-	-	0.770478	0.591776	0	-	FBgn0032479	-1	No	-	Is expressed in adult head; embryonic myoblast; and organism.		3.8107	3.63081	0.755289	1.61977	1.51626	C	T	FALSE	11	94	20	39.2727	0.0773903	12	89	15.0112	47.5833	0.0842127	0.135262	0	43	5.4186	0	0	0	0	0.178702	0.770478	0.591776	-1	23	11	2L	13185138
CG16974	2L:13189517	CDS	GC	K	N	0.60588	0.655457	0.394737	Missense	FBgn0032479	-1	No	-	Is expressed in adult head; embryonic myoblast; and organism.	KAAAAISGDS	3.8107	3.63081	0.755289	1.61977	1.51626	C	G	FALSE	22	83	45.0482	66.9545	0.0598821	28	73	37.5616	50.8929	0.0517731	0.532855	1	42	5.57143	38	0	0.470337	0.358011	-0.0495763	-37.3941	-37.3445	-6	50	21	2L	13189517
Pect	2L:13209737	CDS	CT	D	D	0.678927	0.615432	0	Silent	FBgn0032482	1	No	Cyt_trans-like	Predicted to enable ethanolamine-phosphate cytidylyltransferase activity. Predicted to be involved in phosphatidylethanolamine biosynthetic process. Predicted to be active in cytoplasm. Is expressed in adult head. Human ortholog(s) of this gene implicated in hereditary spastic paraplegia 82. Orthologous to human PCYT2 (phosphate cytidylyltransferase 2, ethanolamine).	DYLIVGLHTD	5.36314	5.70097	0.992665	2.09269	1.92921	C	T	FALSE	25	80	34.85	59.12	0.0584659	29	72	38.0139	53.2069	0.0483341	0.402341	0	43	4.34884	0	0	0	0	0.0634944	0.678927	0.615432	-4	54	25	2L	13209737
CG9395	2L:13350164	ThreePrimeUTR	GA	-	-	0.799206	0.775843	0	-	FBgn0032506	-1	No	-	Predicted to enable UDP-galactosyltransferase activity. Predicted to be involved in N-glycan processing. Is expressed in embryonic antennal sense organ; embryonic brain; and larval ventral nerve cord.		1.70683	1.72285	0.905026	0.0209496	0	C	T	FALSE	7	98	11.2143	27.1429	0.112224	11	90	11.1667	27.8182	0.0799781	0.863972	0	43	0.744186	0	0	0	0	0.0233632	0.799206	0.775843	-4	18	7	2L	13350164
Grx3	2L:13367315	ThreePrimeUTR	CA	-	-	0.607141	0.654142	0.510093	-	FBgn0032509	1	No	-	Predicted to be involved in intracellular iron ion homeostasis. Predicted to be active in cytosol and nucleus. Is expressed in adult head and organism. Orthologous to human GLRX3 (glutaredoxin 3).		5.92388	5.62578	0.546278	5.03217	4.71941	C	A	FALSE	21	84	32.1905	57.1429	0.0588479	31	70	32.0429	53.8387	0.0455894	0.52579	8	35	10.0857	17.875	0.0613479	0.355273	0.139759	-0.047001	-17.2679	-17.2209	-10	52	13	2L	13367315
RpL24	2L:13394241	ThreePrimeUTR	GA	-	-	0.488809	0.51544	0.482727	-	FBgn0032518	-1	No	-	A structural constituent of ribosome. Predicted to be involved in cytoplasmic translation. Located in cytosolic ribosome. Is expressed in adult head; adult heart; and organism. Orthologous to human RPL24 (ribosomal protein L24).		11.1577	11.3686	0.00168671	10.7441	10.5771	C	T	FALSE	36	69	159.913	207.139	0.0235937	51	50	214.28	144.353	0.0242274	0.4489	18	25	109.76	159.5	0.0141954	0.862616	0.436756	-0.0266316	-159.011	-158.985	-15	87	18	2L	13394241
Hacd2	2L:13444189	ThreePrimeUTR	TC	-	-	0.753485	0.702601	0	-	FBgn0032524	-1	No	-	Predicted to enable 3-hydroxyacyl-CoA dehydratase activity and enzyme binding activity. Predicted to be involved in fatty acid elongation; sphingolipid biosynthetic process; and very long-chain fatty acid biosynthetic process. Predicted to be located in endoplasmic reticulum. Is expressed in several structures, including anterior endoderm anlage; embryonic brain; embryonic/larval midgut; extended…		3.79376	3.37863	0.997847	1.50551	1.65153	A	G	FALSE	12	105	21.0381	43.8333	0.0824819	17	101	16.4356	26.2353	0.0721925	0.648609	0	43	3.2093	0	0	0	0	0.0508838	0.753485	0.702601	-5	29	12	2L	13444189
Hacd2	2L:13444550	CDS	CT	A	V	0.792537	0.728146	0	Missense	FBgn0032524	-1	No	Tyr_Pase-like_PTPLA	Predicted to enable 3-hydroxyacyl-CoA dehydratase activity and enzyme binding activity. Predicted to be involved in fatty acid elongation; sphingolipid biosynthetic process; and very long-chain fatty acid biosynthetic process. Predicted to be located in endoplasmic reticulum. Is expressed in several structures, including anterior endoderm anlage; embryonic brain; embryonic/larval midgut; extended…	AQLLGREVGL	3.79376	3.37863	0.997847	1.50551	1.65153	G	A	FALSE	14	105	34.2667	86.5	0.0665645	20	101	24.3069	59.8	0.0637031	0.50008	0	43	4.02326	0	0	0	0	0.0643918	0.792537	0.728146	-6	34	14	2L	13444550
Hacd2	2L:13444699	CDS	GA	P	P	0.784546	0.74629	0	Silent	FBgn0032524	-1	No	Tyr_Pase-like_PTPLA	Predicted to enable 3-hydroxyacyl-CoA dehydratase activity and enzyme binding activity. Predicted to be involved in fatty acid elongation; sphingolipid biosynthetic process; and very long-chain fatty acid biosynthetic process. Predicted to be located in endoplasmic reticulum. Is expressed in several structures, including anterior endoderm anlage; embryonic brain; embryonic/larval midgut; extended…	PRMYAKPVVF	3.79376	3.37863	0.997847	1.50551	1.65153	C	T	FALSE	15	105	29.5619	51.8	0.0720354	17	101	20.5149	38.5882	0.072782	0.712634	0	43	3.44186	0	0	0	0	0.0382555	0.784546	0.74629	-2	32	15	2L	13444699
Hacd2	2L:13444846	CDS	GA	V	V	0.792503	0.756592	0	Silent	FBgn0032524	-1	No	-	Predicted to enable 3-hydroxyacyl-CoA dehydratase activity and enzyme binding activity. Predicted to be involved in fatty acid elongation; sphingolipid biosynthetic process; and very long-chain fatty acid biosynthetic process. Predicted to be located in endoplasmic reticulum. Is expressed in several structures, including anterior endoderm anlage; embryonic brain; embryonic/larval midgut; extended…	VGNAFKFIQL	3.79376	3.37863	0.997847	1.50551	1.65153	C	T	FALSE	10	105	31.2	50.8	0.0611475	20	101	24.901	39.1	0.0649553	0.727266	0	43	3.44186	0	0	0	0	0.0359114	0.792503	0.756592	-10	30	10	2L	13444846
Hacd2	2L:13444924	CDS	TC	Y	Y	0.773978	0.816017	0.176471	Silent	FBgn0032524	-1	No	-	Predicted to enable 3-hydroxyacyl-CoA dehydratase activity and enzyme binding activity. Predicted to be involved in fatty acid elongation; sphingolipid biosynthetic process; and very long-chain fatty acid biosynthetic process. Predicted to be located in endoplasmic reticulum. Is expressed in several structures, including anterior endoderm anlage; embryonic brain; embryonic/larval midgut; extended…	YLYIMVVMGV	3.79376	3.37863	0.997847	1.50551	1.65153	A	G	FALSE	13	105	29.4571	59.0769	0.0773653	20	101	25.2079	50.15	0.0590702	0.665103	1	43	3.60465	17	0	0.0613234	0.0289664	-0.0420381	-16.226	-16.184	-7	33	12	2L	13444924
Hacd2	2L:13445146	CDS	CA	T	T	0.831387	0.799353	0.157895	Silent	FBgn0032524	-1	No	-	Predicted to enable 3-hydroxyacyl-CoA dehydratase activity and enzyme binding activity. Predicted to be involved in fatty acid elongation; sphingolipid biosynthetic process; and very long-chain fatty acid biosynthetic process. Predicted to be located in endoplasmic reticulum. Is expressed in several structures, including anterior endoderm anlage; embryonic brain; embryonic/larval midgut; extended…	TEDDVEVEEK	3.79376	3.37863	0.997847	1.50551	1.65153	G	T	FALSE	12	105	29.1714	49.9167	0.0633113	19	101	23.7426	35.1053	0.0662761	0.745078	1	43	3.67442	19	0	0.0132001	0.0441395	0.0320343	-18.1686	-18.2006	-7	31	11	2L	13445146
Hacd2	2L:13445197	CDS	CA	A	A	0.871636	0.812341	0	Silent	FBgn0032524	-1	No	-	Predicted to enable 3-hydroxyacyl-CoA dehydratase activity and enzyme binding activity. Predicted to be involved in fatty acid elongation; sphingolipid biosynthetic process; and very long-chain fatty acid biosynthetic process. Predicted to be located in endoplasmic reticulum. Is expressed in several structures, including anterior endoderm anlage; embryonic brain; embryonic/larval midgut; extended…	ATPQKPHWLK	3.79376	3.37863	0.997847	1.50551	1.65153	G	T	FALSE	11	105	24.6476	43.2727	0.0511305	16	101	20.3069	31.9375	0.0653372	0.514781	0	43	3.23256	0	0	0	0	0.0592948	0.871636	0.812341	-5	27	11	2L	13445197
kuz	2L:13637484	ThreePrimeUTR	CT	-	-	0.584517	0.758652	1	-	FBgn0259984	1	No	-	kuzbanian (kuz) encodes an ADAM metalloendopeptidase that regulates activation of the receptors encoded by N and robo1 by cleavage.		2.63811	3.81166	0.0321821	1.00466	0.883209	C	T	FALSE	10	95	10.7158	51.8	0.105532	12	89	25.8764	44.8333	0.084049	0.205856	1	42	3.2381	16	0	0.265589	0.44264	-0.174134	-15.4155	-15.2413	-2	22	9	2L	13637484
kuz	2L:13637545	ThreePrimeUTR	CT	-	-	0.577091	0.731818	1	-	FBgn0259984	1	No	-	kuzbanian (kuz) encodes an ADAM metalloendopeptidase that regulates activation of the receptors encoded by N and robo1 by cleavage.		2.63811	3.81166	0.0321821	1.00466	0.883209	C	T	FALSE	9	96	10.125	46.8889	0.110532	17	84	24.2976	43.5882	0.0737341	0.242868	1	42	4.02381	11	0	0.260844	0.403946	-0.154726	-10.4229	-10.2682	-8	26	8	2L	13637545
kuz	2L:13637999	ThreePrimeUTR	GC	-	-	0.746284	0.759183	0	-	FBgn0259984	1	No	-	kuzbanian (kuz) encodes an ADAM metalloendopeptidase that regulates activation of the receptors encoded by N and robo1 by cleavage.		2.63811	3.81166	0.0321821	1.00466	0.883209	G	C	FALSE	6	99	8.42424	41.3333	0.111248	12	89	12.6966	45.8333	0.0721198	0.921324	0	43	2.76744	0	0	0	0	-0.0128998	0.746284	0.759183	-6	18	6	2L	13637999
ics	2L:13641174	CDS	TC	T	T	0.668477	0.790165	0.496943	Silent	FBgn0028546	-1	No	-	icarus (ics) encodes RSU1 (Ras suppressor 1), an adapter protein that participates in integrin-dependent processes by interacting with the integrin effector protein encoded by stck.	THNPELDLAD	3.05528	3.57785	0.958434	4.84636	4.934	A	G	FALSE	13	92	23.3587	43.6923	0.0704247	11	90	18.6778	43.4545	0.0762029	0.253622	8	35	12.8286	22	0.0567182	0.104738	0.0104998	-0.121688	-21.3315	-21.2098	2	24	5	2L	13641174
TfIIS	2L:15059878	CDS	GA	E	E	0.778186	0.729671	0	Silent	FBgn0010422	-1	No	TFIIS_cen_dom	Necessary for efficient RNA polymerase II transcription elongation past template-encoded arresting sites. The arresting sites in DNA have the property of trapping a certain fraction of elongating RNA polymerases that pass through, resulting in locked ternary complexes. Cleavage of the nascent transcript by S-II allows the resumption of elongation from the new 3'-terminus. (UniProtKB:P20232)	EDAIYSEFNN	2.54637	2.11074	0.661046	1.6688	1.56515	C	T	FALSE	12	93	12.0968	57.1667	0.0825306	10	91	8.05495	39.9	0.112598	0.726477	0	43	4.4186	0	0	0	0	0.0485155	0.778186	0.729671	2	22	12	2L	15059878
vig	2L:15063256	ThreePrimeUTR	CT	-	-	0.78085	0.772597	0	-	FBgn0024183	-1	No	-	vasa intronic gene (vig) encodes a protein involved in RNA interference and heterochromatin organization.		5.33256	4.61986	0.289449	1.84562	1.64319	G	A	FALSE	17	105	24	30.9412	0.0657619	14	101	18.4455	37.1429	0.0757702	0.934719	0	43	3.62791	0	0	0	0	0.00825251	0.78085	0.772597	3	31	17	2L	15063256
vig	2L:15063322	ThreePrimeUTR	GT	-	-	0.790092	0.738623	0	-	FBgn0024183	-1	No	-	vasa intronic gene (vig) encodes a protein involved in RNA interference and heterochromatin organization.		5.33256	4.61986	0.289449	1.84562	1.64319	C	A	FALSE	13	105	18.1619	43.6923	0.0699149	12	101	13.7327	24.75	0.0920123	0.657147	0	43	3.44186	0	0	0	0	0.0514686	0.790092	0.738623	1	25	13	2L	15063322
vig	2L:15063447	ThreePrimeUTR	TC	-	-	0.773086	0.838775	0.272727	-	FBgn0024183	-1	No	-	vasa intronic gene (vig) encodes a protein involved in RNA interference and heterochromatin organization.		5.33256	4.61986	0.289449	1.84562	1.64319	A	G	FALSE	25	105	31.1143	47.36	0.0521472	17	101	20.9505	40.6471	0.0602802	0.419062	1	43	4.34884	11	0	0.072052	0.0417536	-0.0656892	-10.2269	-10.1612	8	42	24	2L	15063447
vig	2L:15063594	ThreePrimeUTR	GT	-	-	0.826613	0.818699	0	-	FBgn0024183	-1	No	-	vasa intronic gene (vig) encodes a protein involved in RNA interference and heterochromatin organization.		5.33256	4.61986	0.289449	1.84562	1.64319	C	A	FALSE	18	105	22.5714	27.9444	0.0553748	13	101	14.9901	25.5385	0.080282	0.933647	0	43	3.95349	0	0	0	0	0.00791379	0.826613	0.818699	5	31	18	2L	15063594
vig	2L:15064067	ThreePrimeUTR	GC	-	-	0.77428	0.786707	0.444976	-	FBgn0024183	-1	No	-	vasa intronic gene (vig) encodes a protein involved in RNA interference and heterochromatin organization.		5.33256	4.61986	0.289449	1.84562	1.64319	C	G	FALSE	19	105	22.3333	38.5263	0.0670954	12	101	17.6535	28.4167	0.0858262	0.909622	2	43	5.44186	24.5	0.0813397	0.137758	0.144437	-0.012427	-23.7257	-23.7133	7	31	17	2L	15064067
EndoGI	2L:16259024	CDS	AT	K	M	0.677774	0.590262	0.405155	Missense	FBgn0028515	1	No	-	Endonuclease G inhibitor (EndoGI) encodes an inhibitor of the enzyme encoded by EndoG by tight binding to the enzymatic active site. Since the product of EndoG is mostly or entirely localized in mitochondria, the product of EndoGI has been suggested to protect cells against mis-localization of the enzyme.	KGDAGFYGPD	3.83455	3.62902	0.689888	4.47696	4.36368	A	T	FALSE	25	80	33.05	44.56	0.0596468	21	80	25.025	35.8095	0.0687669	0.339289	22	21	21.6667	19.6364	0.0295175	0.00029204	0.0159669	0.0875128	-18.9586	-19.0461	4	46	3	2L	16259024
Syx5	2L:16308307	CDS	AC	A	A	0.829402	0.692658	0	Silent	FBgn0011708	1	No	-	Syntaxin 5 (Syx5) encodes a type II transmembrane protein in the Q-SNARE family that forms hetero tetramers required for membrane function in the early secretory pathway (ER and Golgi). It has been involved in cytokinesis during spermatogenesis.	AKLEKLTMLA	2.70598	3.01385	0.697866	2.46091	2.19561	A	C	FALSE	11	94	12.2766	32.5455	0.0693183	9	92	14.2391	29.7778	0.0901106	0.236957	0	43	7.23256	0	0	0	0	0.136745	0.829402	0.692658	2	20	11	2L	16308307
mtgo	2L:16603871	FivePrimeUTR	AT	-	-	0.675971	0.774573	0	-	FBgn0259735	1	No	-	Located in plasma membrane. Is expressed in adult brain; adult head; adult mushroom body; and spermatozoon. Orthologous to several human genes including FNDC3B (fibronectin type III domain containing 3B).		3.05458	1.49989	9.41986e-05	1.2153	1.18717	A	T	FALSE	13	92	18.5109	41.8462	0.0745308	6	95	7.51579	20.3333	0.0820451	0.43651	0	43	7.69767	0	0	0	0	-0.0986016	0.675971	0.774573	7	19	13	2L	16603871
mtgo	2L:16603922	FivePrimeUTR	AT	-	-	0.673329	0.661422	0.5	-	FBgn0259735	1	No	-	Located in plasma membrane. Is expressed in adult brain; adult head; adult mushroom body; and spermatozoon. Orthologous to several human genes including FNDC3B (fibronectin type III domain containing 3B).		3.05458	1.49989	9.41986e-05	1.2153	1.18717	A	T	FALSE	15	90	17.7556	48.8667	0.0744268	3	98	7.82653	25.3333	0.170208	0.948881	1	42	7.7619	16	0	0.569681	0.682092	0.011907	-15.3267	-15.3386	12	18	14	2L	16603922
grp	2L:16685512	FivePrimeUTR	CT	-	-	0.776155	0.802715	0	-	FBgn0261278	1	No	-	grapes (grp) encodes a protein that functions in a cell cycle checkpoint pathway that responds to DNA damage.		3.48455	3.61512	0.542406	1.53554	1.40216	C	T	FALSE	15	90	18.3556	34.9333	0.0714485	5	96	21.6771	27.8	0.136233	0.857894	0	43	17.6512	0	0	0	0	-0.0265599	0.776155	0.802715	10	20	15	2L	16685512
VhaSFD	2L:16723635	ThreePrimeUTR	CT	-	-	0.610417	0.617607	0.54778	-	FBgn0027779	-1	No	-	Subunit of the V1 complex of vacuolar(H+)-ATPase (V-ATPase), a multisubunit enzyme composed of a peripheral complex (V1) that hydrolyzes ATP and a membrane integral complex (V0) that translocates protons (By similarity). V-ATPase is responsible for acidifying and maintaining the pH of intracellular compartments and in some cell types, is targeted to the plasma membrane, where it is responsible fo…		5.66391	5.20374	0.436634	3.41702	3.56526	G	A	FALSE	30	75	51.8	52.1333	0.0491291	26	75	48.1067	53.7308	0.060113	0.925857	10	33	45.6364	15.7	0.0403777	0.484813	0.493232	-0.00719035	-15.0896	-15.0824	4	56	20	2L	16723635
VhaSFD	2L:16724477	CDS	TC	N	N	0.63292	0.752015	0.585434	Silent	FBgn0027779	-1	No	-	Subunit of the V1 complex of vacuolar(H+)-ATPase (V-ATPase), a multisubunit enzyme composed of a peripheral complex (V1) that hydrolyzes ATP and a membrane integral complex (V0) that translocates protons (By similarity). V-ATPase is responsible for acidifying and maintaining the pH of intracellular compartments and in some cell types, is targeted to the plasma membrane, where it is responsible fo…	NSVQDLSSFD	5.66391	5.20374	0.436634	3.41702	3.56526	A	G	FALSE	32	73	33.4932	56.3125	0.0445482	28	73	30.9726	37.1071	0.0403152	0.05479	3	40	34.65	16.3333	0.100499	0.753135	0.203683	-0.119095	-15.7004	-15.5813	4	60	29	2L	16724477
CG42750	2L:18275581	FivePrimeUTR	GA	-	-	0.723378	0.689009	0	-	FBgn0261804	-1	No	-	Predicted to enable metallodipeptidase activity. Predicted to be involved in proteolysis. Is expressed in adult head. Orthologous to several human genes including DPEP2 (dipeptidase 2).		2.0103	0.971178	0.413677	0.0131953	0.0278896	C	T	FALSE	11	94	30.5106	75.1818	0.0976269	5	96	13.6354	40.6	0.136738	0.844421	0	43	1.02326	0	0	0	0	0.034369	0.723378	0.689009	6	16	11	2L	18275581
CG42750	2L:18275609	FivePrimeUTR	GT	-	-	0.708198	0.644099	0	-	FBgn0261804	-1	No	-	Predicted to enable metallodipeptidase activity. Predicted to be involved in proteolysis. Is expressed in adult head. Orthologous to several human genes including DPEP2 (dipeptidase 2).		2.0103	0.971178	0.413677	0.0131953	0.0278896	C	A	FALSE	11	94	29.4043	70.5455	0.0975056	5	96	13.1667	35.8	0.14939	0.721279	0	43	1.02326	0	0	0	0	0.0640991	0.708198	0.644099	6	16	11	2L	18275609
RpS26	2L:18442538	ThreePrimeUTR	GT	-	-	0.35951	0.248562	0.223401	-	FBgn0261597	-1	No	-	A structural constituent of ribosome. Predicted to be involved in cytoplasmic translation. Located in cytosolic ribosome. Part of cytosolic small ribosomal subunit. Is expressed in adult head and adult heart. Used to study Diamond-Blackfan anemia. Human ortholog(s) of this gene implicated in Diamond-Blackfan anemia 10. Orthologous to several human genes including RPS26 (ribosomal protein S26).		12.2899	12.334	0.846576	12.1406	11.9459	C	A	FALSE	17	88	217.534	127.941	0.052567	14	87	249.483	206.5	0.0190296	0.0773999	8	35	146.114	79.75	0.0282382	0.101447	0.454053	0.110948	-79.3905	-79.5014	3	31	9	2L	18442538
ncm	2L:18445794	CDS	GA	S	S	0.770093	0.854851	0.964912	Silent	FBgn0086707	-1	No	-	nucampholin (ncm) encodes a protein that is predicted to be an essential component of the spliceosome, implicated in regulation of pre-mRNA splicing and assembly of the exon junction complex.	SSSSDTDSED	2.07645	2.29727	0.913409	1.21747	0.89689	C	T	FALSE	11	94	16.8298	68.0909	0.0739946	11	90	15.3889	63.9091	0.0785033	0.441268	3	40	7.75	14.6667	0.0350877	0.209205	0.493009	-0.0847581	-13.8966	-13.8118	0	22	8	2L	18445794
ncm	2L:18445836	CDS	TC	A	A	0.781375	0.864364	0.892857	Silent	FBgn0086707	-1	No	-	nucampholin (ncm) encodes a protein that is predicted to be an essential component of the spliceosome, implicated in regulation of pre-mRNA splicing and assembly of the exon junction complex.	AGNTKVAPSS	2.07645	2.29727	0.913409	1.21747	0.89689	A	G	FALSE	10	95	16.2737	40.4	0.0787333	11	90	12.7222	50	0.0802694	0.470944	2	41	7.60976	12.5	0.107143	0.563674	0.888323	-0.0829891	-11.7186	-11.6356	-1	21	8	2L	18445836
Bhmt	2L:18956009	CDS	CA	R	R	0.836324	0.583333	0.602789	Silent	FBgn0032727	-1	No	HCY_dom	Predicted to enable S-adenosylmethionine-homocysteine S-methyltransferase activity. Predicted to be involved in S-methylmethionine cycle and methionine biosynthetic process. Is expressed in yolk nucleus.	RVYPTDVLAI	2.23754	2.8315	0.507386	5.3507	5.31308	G	T	FALSE	7	98	16.449	78.1429	0.105787	2	99	26.2828	26	0.416667	0.38649	16	27	35.4815	69.75	0.0613913	0.0569636	0.927258	0.252991	-68.9137	-69.1667	5	9	-9	2L	18956009
Bhmt	2L:18956470	CDS	CA	N	K	0.751603	0.822222	0.579023	Missense	FBgn0032727	-1	No	HCY_dom	Predicted to enable S-adenosylmethionine-homocysteine S-methyltransferase activity. Predicted to be involved in S-methylmethionine cycle and methionine biosynthetic process. Is expressed in yolk nucleus.	NFPDAKFWVS	2.23754	2.8315	0.507386	5.3507	5.31308	G	T	FALSE	8	97	11.7423	69.625	0.122547	3	98	22.7143	18	0.177778	0.764905	14	29	25.4138	60.1429	0.0696363	0.199641	0.173275	-0.0706197	-59.3913	-59.3206	5	11	-6	2L	18956470
Bhmt	2L:18956775	CDS	GA	E	K	0.860775	0.741176	0.585919	Missense	FBgn0032727	-1	No	HCY_dom	Predicted to enable S-adenosylmethionine-homocysteine S-methyltransferase activity. Predicted to be involved in S-methylmethionine cycle and methionine biosynthetic process. Is expressed in yolk nucleus.	ELIQKSVQLA	2.23754	2.8315	0.507386	5.3507	5.31308	C	T	FALSE	8	97	13.3093	87.5	0.0911856	4	97	25.134	17.75	0.188725	0.528146	14	29	28.3448	58	0.0625692	0.0188659	0.320168	0.119598	-57.1392	-57.2588	4	12	-6	2L	18956775
ref(2)P	2L:19545431	ThreePrimeUTR	CA	-	-	0.758832	0.636791	0.536857	-	FBgn0003231	1	No	-	Required for selective autophagy activation by ubiquitinated proteins (PubMed:22622177). Implicated in sigma rhabdovirus multiplication and necessary for male fertility. Involved in activating transcription of Drs (PubMed:12446795, PubMed:2510997). (UniProtKB:P14199)		4.50617	5.57657	0.054498	3.77421	3.62158	C	A	FALSE	8	97	33.6495	42	0.105268	12	89	45.5506	80.5	0.0553773	0.277323	6	37	18.2973	19.3333	0.0479425	0.112091	0.262464	0.122041	-18.5745	-18.6965	-4	20	2	2L	19545431
CG10337	2L:19545431	ThreePrimeUTR	GT	-	-	0.758832	0.636791	0.536857	-	FBgn0032805	-1	No	-	Predicted to enable transmembrane ascorbate ferrireductase activity. Is expressed in adult head.		0.380063	0.390979	0.264365	3.69429	3.05631	C	A	FALSE	8	97	33.6495	42	0.105268	12	89	45.5506	80.5	0.0553773	0.277323	6	37	18.2973	19.3333	0.0479425	0.112091	0.262464	0.122041	-18.5745	-18.6965	-4	20	2	2L	19545431
COX4	2L:19959779	CDS	TC	D	D	0.50698	0.507553	0.36959	Silent	FBgn0032833	1	No	Cyt_c_oxidase_su4_fam	Cytochrome c oxidase subunit 4 (COX4) encodes a subunit of the cytochrome-c oxidase. It is involved in cell proliferation and golgi structural organisation.	DEEHQKAQLQ	9.81625	9.53537	0.832239	8.74932	8.98623	T	C	FALSE	16	89	297.124	348.688	0.0607981	18	83	254.157	289.722	0.0524345	0.994327	8	35	238.314	88	0.0188086	0.132393	0.0994025	-0.000572211	-87.493	-87.4924	-2	34	8	2L	19959779
Arpc2	2L:20420784	CDS	CT	G	G	0.88505	0.585177	0.541707	Silent	FBgn0032859	1	No	ARPC2	Functions as actin-binding component of the Arp2/3 complex which is involved in regulation of actin polymerization and together with an activating nucleation-promoting factor (NPF) mediates the formation of branched actin networks. Seems to contact the mother actin filament (By similarity). (UniProtKB:Q9VIM5)	GEEGQKRAVI	3.9046	4.07069	0.991144	2.77238	2.56212	C	T	FALSE	11	94	21.3191	74.2727	0.0605932	7	94	23.4681	59.1429	0.133135	0.0342118	4	39	4.66667	15.75	0.0501913	0.00673024	0.81842	0.299873	-14.865	-15.1648	4	18	7	2L	20420784
twit	2L:20856280	CDS	AT	I	I	0.433082	0.582348	0	Silent	FBgn0032895	1	No	-	target of wit (twit) encodes a GPI-anchored membrane ligand of the Ly6 family that participates in retrograde signalling as a downstream target of the BMP pathway receptor encoded by wit. It acts in neurons, regulating spontaneous neurotransmitter release during the maturation of larval neuromuscular junctions.	INLLRSCNGT	8.61265	7.85783	0.400253	0.434844	0.167292	A	T	FALSE	15	90	301.289	403.8	0.027227	14	87	276.149	280.286	0.0549394	0.0194149	0	43	2.18605	0	0	0	0	-0.149266	0.433082	0.582348	1	29	15	2L	20856280
twit	2L:20856551	CDS	CT	C	C	0.432534	0.575463	0	Silent	FBgn0032895	1	No	-	target of wit (twit) encodes a GPI-anchored membrane ligand of the Ly6 family that participates in retrograde signalling as a downstream target of the BMP pathway receptor encoded by wit. It acts in neurons, regulating spontaneous neurotransmitter release during the maturation of larval neuromuscular junctions.	CNGALAGASI	8.61265	7.85783	0.400253	0.434844	0.167292	C	T	FALSE	15	90	332.233	440.2	0.0326638	15	86	307.14	284.8	0.0559676	0.0357873	0	43	2.27907	0	0	0	0	-0.142929	0.432534	0.575463	0	30	15	2L	20856551
sky	2L:20871728	ThreePrimeUTR	AT	-	-	0.816374	0.850354	0.613636	-	FBgn0032901	-1	No	-	skywalker (sky) encodes a RabGAP that genetically interacts with and activates GTPase activity of the product of Rab35 through an unconventional mechanism. It restricts the ability of synaptic vesicles to fuse into a synaptic endosomal compartment, thereby limiting synaptic vesicle associated protein sorting at synaptic endosomes. In line with this function, sky also genetically interacts with co…		3.78581	3.16199	0.438386	3.11508	3.02574	T	A	FALSE	8	97	29.1443	75.125	0.083427	11	90	20.7444	38.4545	0.0658535	0.749996	3	40	9.775	15	0.125172	0.228661	0.121578	-0.0339801	-14.1836	-14.1496	-3	19	5	2L	20871728
CG43739	2L:20871728	ThreePrimeUTR	AT	-	-	0.816374	0.850354	0.613636	-	FBgn0263996	-1	No	-	Is expressed in organism.		1.10589	0.96857	0.0346203	0.0138014	0.0412553	T	A	FALSE	8	97	29.1443	75.125	0.083427	11	90	20.7444	38.4545	0.0658535	0.749996	3	40	9.775	15	0.125172	0.228661	0.121578	-0.0339801	-14.1836	-14.1496	-3	19	5	2L	20871728
nrv3	2L:21380190	FivePrimeUTR	CG	-	-	0.602168	0.496092	0	-	FBgn0032946	1	No	-	nervana 3 (nrv3) encodes one of three beta subunits of the sodium-potassium pump (ATPalpha). nrv3 is expressed in the nervous system, including subsets of the CNS and Johnston's organ neurons, and is required for hearing.		9.98583	9.36114	0.242839	0.270495	0.683618	C	G	FALSE	13	92	96.8913	20.9231	0.0659825	15	86	76.8256	20.0667	0.0610697	0.248545	0	43	0.534884	0	0	0	0	0.106076	0.602168	0.496092	-2	28	13	2L	21380190
nrv3	2L:21392675	ThreePrimeUTR	GA	-	-	0.341002	0.482511	0	-	FBgn0032946	1	No	-	nervana 3 (nrv3) encodes one of three beta subunits of the sodium-potassium pump (ATPalpha). nrv3 is expressed in the nervous system, including subsets of the CNS and Johnston's organ neurons, and is required for hearing.		9.98583	9.36114	0.242839	0.270495	0.683618	G	A	FALSE	18	87	41.7701	59	0.0518008	17	84	35.6429	31.5294	0.0714188	0.115309	0	43	0.418605	0	0	0	0	-0.141509	0.341002	0.482511	1	35	18	2L	21392675
Lamp1	2L:21576154	CDS	CT	A	V	0.268992	0.365172	0.142857	Missense	FBgn0032949	1	No	Lysosome-assoc_membr_glycop	Involved in lipophagy. Located in lipid droplet. Is expressed in adult head; adult heart; embryonic/larval Malpighian tubule; embryonic/larval central nervous system; and embryonic/larval digestive system. Human ortholog(s) of this gene implicated in Danon disease and hypertrophic cardiomyopathy. Orthologous to several human genes including LAMP1 (lysosomal associated membrane protein 1).	ALLPEDFPDA	6.42189	7.01568	0.905026	5.99444	5.80456	C	T	FALSE	8	97	51.3505	198.25	0.0612047	11	90	68.4111	102.091	0.0876195	0.417391	1	42	33.8571	28	0	0.514216	0.480709	-0.0961799	-27.731	-27.6348	-3	19	7	2L	21576154
RpL21	2L:22247554	CDS	GT	G	V	0.173854	0.150792	0	Missense	FBgn0032987	-1	No	Ribosomal_eL21	A structural constituent of ribosome. Predicted to be involved in cytoplasmic translation. Located in cytosolic ribosome. Is expressed in adult head; adult heart; and organism. Human ortholog(s) of this gene implicated in hypotrichosis 12. Orthologous to human RPL21 (ribosomal protein L21).	GLPYKAYHGK	11.9931	12.274	2.30553e-06	11.7319	11.5755	C	A	FALSE	12	93	1786.92	532	0.0205248	11	90	1920.24	861	0.0114998	0.350025	0	43	1944.81	0	0	0	0	0.0230613	0.173854	0.150792	1	23	12	2L	22247554
Yeti	2R:1344823	CDS	CT	A	V	0.385975	0.20777	0	Missense	FBgn0267398	-1	No	-	Yeti (Yeti) encodes an essential chromatin protein that interacts with subunits of the Tip60 chromatin remodeling complex. Yeti loss results in lethality at the larval stage and in chromosome organization defects.	ALWADFLGDI	7.07083	7.28172	0.350739	5.78349	5.4625	G	A	FALSE	6	99	125.02	150.333	0.140147	12	89	141.045	169.417	0.0338919	0.117135	0	43	42.1395	0	0	0	0	0.178205	0.385975	0.20777	-6	18	6	2R	1344823
RNASEK	2R:4187491	ThreePrimeUTR	TG	-	-	0.275442	0.310882	0.3	-	FBgn0262116	-1	No	-	Ribonuclease kappa (RNASEK) encodes a protein involved in clathrin-mediated endocytosis of large cargo, such as viruses.		9.71502	9.16476	0.450255	7.55678	7.90755	A	C	FALSE	13	92	27.663	27.6923	0.042614	7	94	21.1383	22.8571	0.0491177	0.61134	1	42	9.69048	22	0	0.880153	0.940113	-0.0354403	-21.7246	-21.6891	6	20	12	2R	4187491
Cndp2	2R:5699203	CDS	AT	L	L	0.704341	0.705897	0.475383	Silent	FBgn0287767	1	No	Peptidase_M20	Predicted to enable peptidase activity. Predicted to be involved in proteolysis. Located in cytosol and nucleus. Is expressed in several structures, including embryonic Malpighian tubule; embryonic/larval crystal cell; embryonic/larval digestive system; embryonic/larval midgut primordium; and procrystal cell.	LVPGVDRDVA						A	T	FALSE	19	86	11.0233	53.1579	0.066923	16	85	8.64706	56.75	0.0749309	0.987707	9	34	5.35294	31.8889	0.0267225	0.0301849	0.0348098	-0.00155602	-31.1845	-31.183	3	35	10	2R	5699203
dpr12	2R:5859473	ThreePrimeUTR	CT	-	-	0.67031	0.577356	0	-	FBgn0085414	1	No	-	Involved in synapse organization and synaptic target recognition. Predicted to be active in neuron projection membrane. Is expressed in embryonic head sensory system; larval ventral nerve cord; and ventral nerve cord primordium.		3.00669	4.12702	0.144961	0.111865	0.0645508	C	T	FALSE	6	99	6.89899	35.8333	0.122707	17	84	15.0476	34.7059	0.0760532	0.535243	0	43	0.767442	0	0	0	0	0.0929544	0.67031	0.577356	-11	23	6	2R	5859473
dpr12	2R:5859483	ThreePrimeUTR	TA	-	-	0.672515	0.609367	0	-	FBgn0085414	1	No	-	Involved in synapse organization and synaptic target recognition. Predicted to be active in neuron projection membrane. Is expressed in embryonic head sensory system; larval ventral nerve cord; and ventral nerve cord primordium.		3.00669	4.12702	0.144961	0.111865	0.0645508	T	A	FALSE	6	99	6.63636	34.3333	0.125872	18	83	14.0482	32.8889	0.0730985	0.669582	0	43	0.767442	0	0	0	0	0.0631478	0.672515	0.609367	-12	24	6	2R	5859483
dpr12	2R:5860158	ThreePrimeUTR	TA	-	-	0.799305	0.599163	0	-	FBgn0085414	1	No	-	Involved in synapse organization and synaptic target recognition. Predicted to be active in neuron projection membrane. Is expressed in embryonic head sensory system; larval ventral nerve cord; and ventral nerve cord primordium.		3.00669	4.12702	0.144961	0.111865	0.0645508	T	A	FALSE	4	101	11.1485	26.75	0.152558	15	86	14.3256	30.8	0.0679203	0.206751	0	43	0.744186	0	0	0	0	0.200142	0.799305	0.599163	-11	19	4	2R	5860158
Act42A	2R:6013911	ThreePrimeUTR	TC	-	-	0.259539	0.249356	0	-	FBgn0000043	-1	No	-	Actins are highly conserved proteins that are involved in various types of cell motility and are ubiquitously expressed in all eukaryotic cells. Multiple isoforms are involved in various cellular functions such as cytoskeleton structure, cell mobility, chromosome movement and muscle contraction. (UniProtKB:P02572)		8.97693	9.22469	0.0728396	4.58263	5.14286	A	G	FALSE	14	91	23.2308	16.2857	0.0315789	14	87	33.2874	24.3571	0.0220327	0.793512	0	43	4.62791	0	0	0	0	0.0101831	0.259539	0.249356	0	28	14	2R	6013911
Act42A	2R:6014646	CDS	GA	G	E	0.315038	0.151623	0	Missense	FBgn0000043	-1	No	Actin	Actins are highly conserved proteins that are involved in various types of cell motility and are ubiquitously expressed in all eukaryotic cells. Multiple isoforms are involved in various cellular functions such as cytoskeleton structure, cell mobility, chromosome movement and muscle contraction. (UniProtKB:P02572)	GNERFRCPES	8.97693	9.22469	0.0728396	4.58263	5.14286	C	T	FALSE	7	98	223.051	172.857	0.125585	11	90	297.256	191.909	0.00841822	0.11814	0	43	36.3256	0	0	0	0	0.163415	0.315038	0.151623	-4	18	7	2R	6014646
Act42A	2R:6014816	CDS	TC	T	T	0	0.240741	0.236597	Silent	FBgn0000043	-1	No	Actin	Actins are highly conserved proteins that are involved in various types of cell motility and are ubiquitously expressed in all eukaryotic cells. Multiple isoforms are involved in various cellular functions such as cytoskeleton structure, cell mobility, chromosome movement and muscle contraction. (UniProtKB:P02572)	TERGYSFTTT	8.97693	9.22469	0.0728396	4.58263	5.14286	A	G	FALSE	0	105	215.057	0	0	1	100	293.68	54	0	0	14	29	32.8621	45.2857	0.0144233	0	0.942001	-0.240741	-45.2857	-45.045	-1	1	-14	2R	6014816
Act42A	2R:6014819	CDS	TG	L	M	0	0.265306	0.23743	Missense	FBgn0000043	-1	No	Actin	Actins are highly conserved proteins that are involved in various types of cell motility and are ubiquitously expressed in all eukaryotic cells. Multiple isoforms are involved in various cellular functions such as cytoskeleton structure, cell mobility, chromosome movement and muscle contraction. (UniProtKB:P02572)	LTERGYSFTT	8.97693	9.22469	0.0728396	4.58263	5.14286	A	C	FALSE	0	105	201.276	0	0	1	100	272.78	49	0	0	14	29	31.069	44.8571	0.0143757	0	0.624972	-0.265306	-44.8571	-44.5918	-1	1	-14	2R	6014819
Act42A	2R:6014822	CDS	TC	I	I	0	0.25	0.23304	Silent	FBgn0000043	-1	No	Actin	Actins are highly conserved proteins that are involved in various types of cell motility and are ubiquitously expressed in all eukaryotic cells. Multiple isoforms are involved in various cellular functions such as cytoskeleton structure, cell mobility, chromosome movement and muscle contraction. (UniProtKB:P02572)	ILTERGYSFT	8.97693	9.22469	0.0728396	4.58263	5.14286	A	G	FALSE	0	105	214.771	0	0	1	100	289.65	52	0	0	14	29	31.8966	45.2143	0.0142177	0	0.762967	-0.25	-45.2143	-44.9643	-1	1	-14	2R	6014822
SCAP	2R:6036209	FivePrimeUTR	CG	-	-	0.76163	0.674665	0	-	FBgn0033052	-1	No	-	Predicted to enable sterol binding activity. Predicted to be involved in regulation of cholesterol biosynthetic process. Predicted to be located in Golgi membrane. Predicted to be part of SREBP-SCAP complex. Predicted to be active in endoplasmic reticulum membrane. Is expressed in adult head. Orthologous to human SCAP (SREBF chaperone).		1.91831	1.66188	0.759488	0.962168	0.935363	G	C	FALSE	11	94	25.8617	36	0.0981743	10	91	27.3736	37.3	0.111003	0.562756	0	43	7.81395	0	0	0	0	0.086965	0.76163	0.674665	1	21	11	2R	6036209
CG14591	2R:6036627	ThreePrimeUTR	GA	-	-	0.783992	0.692108	0	-	FBgn0033054	-1	No	-	Is expressed in Bolwig organ and adult head. Orthologous to human TMEM164 (transmembrane protein 164).		4.47495	4.49171	0.904654	0.132465	0.0680559	C	T	FALSE	21	84	30.881	36.4762	0.0520417	27	74	30.3108	26.963	0.0511572	0.220585	0	43	4.30233	0	0	0	0	0.0918842	0.783992	0.692108	-6	48	21	2R	6036627
EcR	2R:6092515	ThreePrimeUTR	AT	-	-	0.420824	0.383834	0.198686	-	FBgn0000546	-1	No	-	Ecdysone receptor (EcR) encodes a protein that interacts with the product of usp to form the nuclear ecdysone receptor heterodimer, which modulates, in conjunction with co-activators and co-repressors, the activities of hundreds of genes in a tissue- and stage-specific way. EcR is widely expressed in embryonic and larval tissues and in some adult tissues where its activities (modulated by the hor…		4.61238	4.32981	0.548578	2.46896	2.59811	T	A	FALSE	13	92	46.2717	36.7692	0.0830931	19	82	52.1585	38.2105	0.0734005	0.744129	2	41	14.8049	25	0.00821018	0.328181	0.433747	0.0369896	-24.5792	-24.6162	-6	32	11	2R	6092515
Vha16-1	2R:6625516	ThreePrimeUTR	GA	-	-	0.346958	0.252217	0.263285	-	FBgn0262736	-1	No	-	Vacuolar H[+] ATPase 16kD subunit 1 (Vha16-1) encodes the proteolipid component of V-ATPase, which is a multi-functional channel protein. It contributes to vesicle-membrane fusion, hydrophilic molecule transport and intercellular communication.		8.42356	8.78145	0.297901	6.11325	6.08202	C	T	FALSE	8	97	133.309	109	0.108383	11	90	159.867	184.273	0.0474754	0.389383	2	41	60.0244	20.5	0.0410628	0.722313	0.925824	0.0947409	-20.153	-20.2478	-3	19	6	2R	6625516
geminin	2R:6655929	CDS	CT	P	S	0.676253	0.996732	0.769231	Missense	FBgn0033081	-1	No	Geminin/Multicilin	geminin (geminin) encodes a protein that interacts with the replication factor encoded by dup and regulates the Egfr pathway, DNA replication and chromosome ploidy.	PITAEDLTST	2.83006	1.89165	0.0954843	1.42617	1.74095	G	A	FALSE	12	93	24.2688	59.5833	0.0852924	9	92	17.913	30.1111	0.00326797	0.00439232	1	42	5.35714	13	0	0.768033	1.91414e-08	-0.320479	-12.3237	-12.0033	3	21	11	2R	6655929
hlk	2R:6726898	ThreePrimeUTR	TC	-	-	0.635101	0.577458	0.458399	-	FBgn0010482	-1	No	-	Is expressed in several structures, including adult fat body; adult heart; embryonic/larval somatic muscle cell; integumentary system; and spermatozoon.		1.0916	0.886762	0.977142	4.01043	3.72006	A	G	FALSE	6	99	10.1414	37.1667	0.163356	6	95	7.89474	77.6667	0.143029	0.796028	11	32	14.375	34.6364	0.0227863	0.16599	0.284767	0.0576429	-34.0013	-34.0589	0	12	-5	2R	6726898
CanB2	2R:7788241	ThreePrimeUTR	CT	-	-	0.410732	0.352439	0	-	FBgn0015614	1	No	-	Calcineurin is a calcium-binding and calmodulin-binding protein found in all cells from yeast to mammals, and a calcium-dependent, calmodulin-stimulated protein phosphatase. (UniProtKB:Q24214)		4.56216	5.99043	0.00192978	5.06078	4.6365	C	T	FALSE	7	98	20.9082	31.8571	0.113733	11	90	34.5889	45.7273	0.0453832	0.590153	0	43	10.7209	0	0	0	0	0.0582928	0.410732	0.352439	-4	18	7	2R	7788241
Gapdh1	2R:7792075	ThreePrimeUTR	GA	-	-	0.142305	0.235401	0	-	FBgn0001091	-1	No	-	Glyceraldehyde 3 phosphate dehydrogenase 1 (Gapdh1) encodes a glyceraldehyde-3-phosphate dehydrogenase involved in glycolysis, myoblast fusion and the development of somatic muscle.		10.455	9.5516	0.493717	10.37	10.973	C	T	FALSE	7	98	853.327	332.857	0.0179276	14	87	693.448	243.5	0.0399487	0.128326	0	43	1476.37	0	0	0	0	-0.0930963	0.142305	0.235401	-7	21	7	2R	7792075
CG12159	2R:7916058	CDS	GA	E	K	0.49654	0.31255	0	Missense	FBgn0033232	-1	No	DUF1180	Is expressed in adult head.	EMVQPPGGLP	6.20475	6.32483	0.708054	2.77155	2.57511	C	T	FALSE	12	93	88.4731	75.25	0.0834619	6	95	100.095	96.3333	0.0601038	0.165877	0	43	30.8372	0	0	0	0	0.18399	0.49654	0.31255	6	18	12	2R	7916058
Cul1	2R:7920422	ThreePrimeUTR	CG	-	-	0.804504	0.775679	0	-	FBgn0015509	1	No	-	Core component of multiple SCF (SKP1-CUL1-F-box protein) E3 ubiquitin-protein ligase complexes which mediate the ubiquitination of proteins involved in cell cycle progression, signal transduction and transcription. In the SCF complex, serves as a rigid scaffold that organizes the SKP1-F-box protein and RBX1 subunits. May contribute to catalysis through positioning of the substrate and the ubiquit…		2.08014	2.74507	0.935588	1.24132	1.19352	C	G	FALSE	9	96	29.875	54.1111	0.0984801	23	78	28.359	35.6522	0.061944	0.806475	0	43	29.2791	0	0	0	0	0.0288256	0.804504	0.775679	-14	32	9	2R	7920422
CG14764	2R:7942629	ThreePrimeUTR	GA	-	-	0.388702	0.546558	0	-	FBgn0033236	-1	No	-	Is expressed in adult head and organism.		3.63595	4.28822	0.22193	0.652756	0.775469	C	T	FALSE	6	99	29.0202	34.1667	0.124105	11	90	41.0667	35.4545	0.0838645	0.295626	0	43	18	0	0	0	0	-0.157856	0.388702	0.546558	-5	17	6	2R	7942629
CG2915	2R:7959752	FivePrimeUTR	CA	-	-	0.795527	0.923077	0.333333	-	FBgn0033241	-1	No	-	Predicted to enable metallocarboxypeptidase activity. Predicted to be involved in proteolysis. Located in vesicle. Is expressed in several structures, including anterior endoderm anlage; ectoderm; ectoderm anlage; embryonic/larval crystal cell; and extended germ band embryo. Human ortholog(s) of this gene implicated in chronic kidney disease. Orthologous to several human genes including CPA5 (car…		3.00953	2.32969	0.0814798	2.83331	2.92156	G	T	FALSE	17	88	19.8182	35	0.0562001	4	97	20.1134	17.75	0.0769231	0.312582	1	42	16.9048	12	0	0.0704201	0.0415794	-0.12755	-11.2045	-11.0769	13	21	16	2R	7959752
CSN4	2R:7973069	CDS	TC	M	M	0.79893	0.796662	0.564908	Silent	FBgn0027054	1	No	-	COP9 signalosome subunit 4 (CSN4) encodes the subunit 4 of the COP9 signalosome (CSN) and is essential for the stability of the complex. The CSN plays a central role in the regulation of E3-cullin RING ubiquitin ligases.	MGTYLKIARL	2.71701	2.92813	0.927838	3.57475	3.3122	T	C	FALSE	30	75	19.08	44	0.0460642	23	78	21.2564	35	0.0545818	0.974668	7	36	20.3333	17.8571	0.0487967	0.023737	0.0331589	0.00226782	-17.0582	-17.0605	7	53	23	2R	7973069
udd	2R:8106926	CDS	TA	I	I	0.849958	0.662783	0.545455	Silent	FBgn0033261	1	No	-	under-developed (udd) encodes a protein that interacts with the products of TAF1B and TAF1C-like, and helps to regulate RNA Polymerase I dependent rRNA transcription.	ILS*	3.42434	3.53721	0.752761	2.50723	2.72525	T	A	FALSE	27	78	17.6154	36.8889	0.0332277	11	90	19.9667	50.2727	0.0604	0.00640951	1	42	9.02381	11	0	0.0951485	0.587304	0.187175	-10.15	-10.3372	16	38	26	2R	8106926
udd	2R:8106932	CDS	CA	S	S	0.826637	0.652794	0.545455	Silent	FBgn0033261	1	No	-	under-developed (udd) encodes a protein that interacts with the products of TAF1B and TAF1C-like, and helps to regulate RNA Polymerase I dependent rRNA transcription.	S*	3.42434	3.53721	0.752761	2.50723	2.72525	C	A	FALSE	20	85	16.7529	35.7	0.041225	11	90	17.6889	43.6364	0.0622611	0.0225992	1	42	8.42857	11	0	0.153057	0.629471	0.173844	-10.1734	-10.3472	9	31	19	2R	8106932
Lpin	2R:8137640	CDS	GA	P	P	0.728894	0.562934	0	Silent	FBgn0263593	-1	No	-	Lipin (Lpin) encodes a protein that plays a central role in fat body function and energy metabolism. It works as a phosphatidate phosphatase required for normal insulin pathway signaling.	PVKLDEASAE	4.39667	5.07773	0.241101	2.14187	1.82211	C	T	FALSE	23	82	36.8171	41.8261	0.0608623	10	91	39.1429	34.1	0.0907814	0.14162	0	43	8.81395	0	0	0	0	0.16596	0.728894	0.562934	13	33	23	2R	8137640
Lpin	2R:8142846	FivePrimeUTR	GA	-	-	0.818799	0.497065	0	-	FBgn0263593	-1	No	-	Lipin (Lpin) encodes a protein that plays a central role in fat body function and energy metabolism. It works as a phosphatidate phosphatase required for normal insulin pathway signaling.		4.39667	5.07773	0.241101	2.14187	1.82211	C	T	FALSE	15	90	22.6556	40.0667	0.0688323	3	98	14.3163	37	0.236016	0.0966458	0	43	8.88372	0	0	0	0	0.321734	0.818799	0.497065	12	18	15	2R	8142846
kermit	2R:8156297	FivePrimeUTR	GA	-	-	0.783965	0.663599	0	-	FBgn0010504	-1	No	-	kermit (kermit) encodes a GIPC (GAIP interacting protein, C terminus) type protein. It interacts with the product of Gyc76C, facilitating neuron axon guidance in a process mediated by the product of PlexA. It also physically and genetically interacts with the product of jar during wing planar cell polarity establishment. It is required for locomotive activity and determination of lifespan.		0.870174	0.7957	0.872313	0.705398	0.872813	C	T	FALSE	16	89	23.2135	43.625	0.0628388	8	93	22.9677	27.25	0.133419	0.359943	0	43	26.5116	0	0	0	0	0.120366	0.783965	0.663599	8	24	16	2R	8156297
Lpin	2R:8156297	FivePrimeUTR	GA	-	-	0.783965	0.663599	0	-	FBgn0263593	-1	No	-	Lipin (Lpin) encodes a protein that plays a central role in fat body function and energy metabolism. It works as a phosphatidate phosphatase required for normal insulin pathway signaling.		4.39667	5.07773	0.241101	2.14187	1.82211	C	T	FALSE	16	89	23.2135	43.625	0.0628388	8	93	22.9677	27.25	0.133419	0.359943	0	43	26.5116	0	0	0	0	0.120366	0.783965	0.663599	8	24	16	2R	8156297
kermit	2R:8156467	FivePrimeUTR	CT	-	-	0.73363	0.662059	0	-	FBgn0010504	-1	No	-	kermit (kermit) encodes a GIPC (GAIP interacting protein, C terminus) type protein. It interacts with the product of Gyc76C, facilitating neuron axon guidance in a process mediated by the product of PlexA. It also physically and genetically interacts with the product of jar during wing planar cell polarity establishment. It is required for locomotive activity and determination of lifespan.		0.870174	0.7957	0.872313	0.705398	0.872813	G	A	FALSE	14	91	23.4396	51.6429	0.0702833	5	96	22.4688	31.4	0.183531	0.657222	0	43	26.5116	0	0	0	0	0.0715715	0.73363	0.662059	9	19	14	2R	8156467
Lpin	2R:8156467	FivePrimeUTR	CT	-	-	0.73363	0.662059	0	-	FBgn0263593	-1	No	-	Lipin (Lpin) encodes a protein that plays a central role in fat body function and energy metabolism. It works as a phosphatidate phosphatase required for normal insulin pathway signaling.		4.39667	5.07773	0.241101	2.14187	1.82211	G	A	FALSE	14	91	23.4396	51.6429	0.0702833	5	96	22.4688	31.4	0.183531	0.657222	0	43	26.5116	0	0	0	0	0.0715715	0.73363	0.662059	9	19	14	2R	8156467
CG30373	2R:8164612	FivePrimeUTR	CT	-	-	0.905556	0.763803	0	-	FBgn0050373	-1	No	-	Is expressed in adult head; adult heart; embryonic Malpighian tubule; embryonic/larval midgut; and organism. Orthologous to human UQCC4 (ubiquinol-cytochrome c reductase complex assembly factor 4).		3.09479	2.82339	0.748454	1.90037	1.88877	G	A	FALSE	15	105	40.6381	28.1333	0.0531187	10	101	26.3663	33.7	0.0951203	0.173697	0	43	38.7907	0	0	0	0	0.141753	0.905556	0.763803	5	25	15	2R	8164612
pnut	2R:8238224	CDS	CT	V	V	0.656314	0.654742	0	Silent	FBgn0013726	1	No	-	peanut (pnut) encodes a protein that belongs to the septin family of polymerizing GTPases. Together with the products of Septin1 and Septin2, it forms the septin complex. It participates in cytokinesis and other processes that involve organization of the cell cortex.	VGGRPPNQPP	4.19271	4.26349	0.83449	1.16797	1.53389	C	T	FALSE	14	91	26.0659	28.7143	0.0857393	8	93	18.3118	37.875	0.117871	0.99141	0	43	42.6512	0	0	0	0	0.00157157	0.656314	0.654742	6	22	14	2R	8238224
pnut	2R:8238250	CDS	CT	P	L	0.739596	0.722767	0	Missense	FBgn0013726	1	No	-	peanut (pnut) encodes a protein that belongs to the septin family of polymerizing GTPases. Together with the products of Septin1 and Septin2, it forms the septin complex. It participates in cytokinesis and other processes that involve organization of the cell cortex.	PSVPVAASGK	4.19271	4.26349	0.83449	1.16797	1.53389	C	T	FALSE	18	87	25.8736	27.1111	0.071008	7	94	18.5745	36.2857	0.107562	0.899877	0	43	42.5814	0	0	0	0	0.0168297	0.739596	0.722767	11	25	18	2R	8238250
pnut	2R:8239511	CDS	CT	I	I	0.693606	0.6227	0	Silent	FBgn0013726	1	No	-	peanut (pnut) encodes a protein that belongs to the septin family of polymerizing GTPases. Together with the products of Septin1 and Septin2, it forms the septin complex. It participates in cytokinesis and other processes that involve organization of the cell cortex.	IRELEEKRRE	4.19271	4.26349	0.83449	1.16797	1.53389	C	T	FALSE	26	79	29.2785	47.7308	0.0558668	11	90	26.7444	54.0909	0.0928183	0.503478	0	43	43.3721	0	0	0	0	0.0709057	0.693606	0.6227	15	37	26	2R	8239511
CSN7	2R:8428418	ThreePrimeUTR	CT	-	-	0.445896	0.319802	0	-	FBgn0028836	1	No	-	COP9 signalosome subunit 7 (CSN7) encodes the subunit 7 of the COP9 signalosome (CSN) and is essential for the stability of the complex. The CSN plays a central role in the regulation of E3-cullin RING ubiquitin ligases.		4.05874	4.25969	0.939855	3.07558	2.74675	C	T	FALSE	8	97	32.2165	41.25	0.0914439	14	87	31.5057	68.4286	0.0416022	0.165999	0	43	59.5814	0	0	0	0	0.126093	0.445896	0.319802	-6	22	8	2R	8428418
Lcp3	2R:8435568	CDS	TC	C	C	0.177305	0	0.182913	Silent	FBgn0002534	1	No	-	Component of the larval cuticle. (UniProtKB:P07188)	CSLAALVAAN	3.79964	4.15188	0.427043	8.9211	10.1667	T	C	FALSE	1	104	98.4135	141	0	0	101	228.119	0	0	0	11	32	2851.62	321.818	0.0147958	0.91504	0	0.177305	-321.641	-321.818	1	1	-10	2R	8435568
Lcp3	2R:8435569	CDS	TG	S	A	0	0	0.185592	Missense	FBgn0002534	1	No	-	Component of the larval cuticle. (UniProtKB:P07188)	SLAALVAANA	3.79964	4.15188	0.427043	8.9211	10.1667	T	G	FALSE	0	105	98.1238	0	0	0	101	223.465	0	0	0	11	32	2811.97	323.091	0.0155991	0	0	0	-323.091	-323.091	0	0	-11	2R	8435569
Lcp3	2R:8435571	CDS	TC	S	S	0	0	0.179838	Silent	FBgn0002534	1	No	-	Component of the larval cuticle. (UniProtKB:P07188)	SLAALVAANA	3.79964	4.15188	0.427043	8.9211	10.1667	T	C	FALSE	0	105	98.0381	0	0	0	101	223.99	0	0	0	12	31	2410.81	449.667	0.0157236	0	0	0	-449.667	-449.667	0	0	-12	2R	8435571
Lcp3	2R:8435574	CDS	CT	L	L	0	0	0.176366	Silent	FBgn0002534	1	No	-	Component of the larval cuticle. (UniProtKB:P07188)	LAALVAANAN	3.79964	4.15188	0.427043	8.9211	10.1667	C	T	FALSE	0	105	97.6	0	0	0	101	221.703	0	0	0	12	31	2823.61	330	0.0152298	0	0	0	-330	-330	0	0	-12	2R	8435574
Lcp3	2R:8435576	CDS	CT	A	V	0	0	0.172963	Missense	FBgn0002534	1	No	-	Component of the larval cuticle. (UniProtKB:P07188)	AALVAANANV	3.79964	4.15188	0.427043	8.9211	10.1667	C	T	FALSE	0	105	98.0857	0	0	0	101	222.614	0	0	0	12	31	2830.58	335	0.0146316	0	0	0	-335	-335	0	0	-12	2R	8435576
Lcp3	2R:8435597	CDS	CA	A	D	0	0	0.140039	Missense	FBgn0002534	1	No	-	Component of the larval cuticle. (UniProtKB:P07188)	ANVEVKELVN	3.79964	4.15188	0.427043	8.9211	10.1667	C	A	FALSE	0	105	93.7143	0	0	0	101	210.554	0	0	0	13	30	2801.7	282.385	0.00948823	0	0	0	-282.385	-282.385	0	0	-13	2R	8435597
Lcp3	2R:8435598	CDS	TG	A	A	0	0	0.140704	Silent	FBgn0002534	1	No	-	Component of the larval cuticle. (UniProtKB:P07188)	ANVEVKELVN	3.79964	4.15188	0.427043	8.9211	10.1667	T	G	FALSE	0	105	94.2381	0	0	0	101	212.218	0	0	0	13	30	2817.17	281.385	0.00959888	0	0	0	-281.385	-281.385	0	0	-13	2R	8435598
Lcp3	2R:8435602	CDS	GC	V	M	0	0	0.137359	Missense	FBgn0002534	1	No	-	Component of the larval cuticle. (UniProtKB:P07188)	VEVKELVNDV	3.79964	4.15188	0.427043	8.9211	10.1667	G	C	FALSE	0	105	95.4381	0	0	0	101	214.99	0	0	0	14	29	2836.31	302.929	0.00771299	0	0	0	-302.929	-302.929	0	0	-14	2R	8435602
Lcp3	2R:8435603	CDS	TC	V	A	0	0	0.126935	Missense	FBgn0002534	1	No	-	Component of the larval cuticle. (UniProtKB:P07188)	VEVKELVNDV	3.79964	4.15188	0.427043	8.9211	10.1667	T	C	FALSE	0	105	94.3429	0	0	0	101	212.465	0	0	0	12	31	2694.65	268.083	0.00550994	0	0	0	-268.083	-268.083	0	0	-12	2R	8435603
mtt	2R:8474894	ThreePrimeUTR	AT	-	-	0.916398	0.586806	0	-	FBgn0050361	-1	No	-	Enables G protein-coupled receptor activity. Involved in adult feeding behavior; phospholipase C-activating G protein-coupled receptor signaling pathway; and response to insecticide. Located in dendrite and plasma membrane. Is expressed in adult head; adult integumentary system; gustatory receptor neurons; and labral sense organ neurons.		2.71202	2.92915	0.975072	0.0567938	0.0342396	T	A	FALSE	14	91	62.8901	49.8571	0.0344491	4	97	123.66	31	0.148982	0.00408217	0	43	883.721	0	0	0	0	0.329592	0.916398	0.586806	10	18	14	2R	8474894
shrb	2R:9143637	CDS	CG	A	G	0.5	0.55799	0.583333	Missense	FBgn0086656	-1	No	Snf7_fam	shrub (shrb) encodes Shrub encodes Vps32/Snf7, a filament-forming subunit of the ESCRT-III complex involved in inward membrane budding. It regulates multiple cellular processes involving ESCRTs activity including multivesicular body biogenesis, cytokinesis, membrane repair and regulation of membrane associated signaling.	ASKNKRVALQ	7.16916	8.13306	0.015678	5.94313	5.58988	G	C	FALSE	1	104	107.317	14	0	16	85	151.788	25.5625	0.0539877	0.79801	1	42	39.4048	12	0	0	0.910863	-0.0579896	-11.5	-11.442	-15	17	0	2R	9143637
VhaAC45	2R:9209361	ThreePrimeUTR	GT	-	-	0.281295	0.28757	0.202584	-	FBgn0262515	1	No	-	Accessory subunit of the proton-transporting vacuolar (V)-ATPase protein pump, which is required for luminal acidification of secretory vesicles. (UniProtKB:Q7JR49)		6.74784	6.52566	0.860581	4.12796	4.48422	G	T	FALSE	19	86	76.4419	70.9474	0.0335148	15	86	63.0116	63.9333	0.0439712	0.908682	3	40	24.775	30.3333	0.0319179	0.375218	0.414786	-0.00627494	-30.052	-30.0458	4	34	16	2R	9209361
VhaAC45	2R:9209488	ThreePrimeUTR	CT	-	-	0.261909	0.291324	0.179514	-	FBgn0262515	1	No	-	Accessory subunit of the proton-transporting vacuolar (V)-ATPase protein pump, which is required for luminal acidification of secretory vesicles. (UniProtKB:Q7JR49)		6.74784	6.52566	0.860581	4.12796	4.48422	C	T	FALSE	31	74	109.392	52.0323	0.0348202	32	69	95.7246	58.875	0.0431389	0.598961	9	34	23.3824	29.1111	0.0219126	0.221003	0.18497	-0.029415	-28.8492	-28.8198	-1	63	22	2R	9209488
Drep2	2R:9302063	ThreePrimeUTR	GA	-	-	0.803634	0.846262	0	-	FBgn0028408	1	No	-	DNA fragmentation factor-related protein 2 (Drep2) encodes a protein involved in neuron death regulation.		4.1252	3.23212	0.047816	0.282854	0.0761698	G	A	FALSE	20	85	31.6	46.1	0.0589411	7	94	35.5745	33.5714	0.100898	0.71662	0	43	6.27907	0	0	0	0	-0.0426275	0.803634	0.846262	13	27	20	2R	9302063
Non1	2R:9397142	CDS	AC	P	P	0.584655	0.746053	0.545921	Silent	FBgn0028473	-1	No	NOG_C	Involved in the biogenesis of the 60S ribosomal subunit (By similarity). Required for normal assembly of the mitotic spindle (PubMed:24255106). May be involved in both centrosome-dependent and centrosome-independent spindle assembly programs (PubMed:24255106). Acts as TP53 repressor, preventing TP53 stabilization and cell cycle arrest (PubMed:20308539, PubMed:35413237). (UniProtKB:Q9V411)	PEFWQGHNIA	6.03749	5.45285	0.305987	4.58576	4.44045	T	G	FALSE	40	65	38.2462	41.375	0.046627	13	88	42.4773	38.3846	0.0624337	0.0769402	8	35	11.1714	18.75	0.0440906	0.718606	0.0334455	-0.161398	-18.1653	-18.0039	27	53	32	2R	9397142
prel	2R:9425682	ThreePrimeUTR	GC	-	-	0.758052	0.663603	0	-	FBgn0033413	1	No	-	preli-like (prel) encodes a mitochondrial protein in the PRELI/MSF1 family that contributes to the integrity of mitochondrial structures and the activity of respiratory chain complex IV.		2.28608	1.30232	0.0580219	1.30797	1.26214	G	C	FALSE	11	94	21.1277	31.3636	0.0889476	2	99	18.303	16.5	0.101103	0.674243	0	43	6.55814	0	0	0	0	0.0944491	0.758052	0.663603	9	13	11	2R	9425682
prel	2R:9425691	ThreePrimeUTR	GA	-	-	0.758601	0.647917	0	-	FBgn0033413	1	No	-	preli-like (prel) encodes a mitochondrial protein in the PRELI/MSF1 family that contributes to the integrity of mitochondrial structures and the activity of respiratory chain complex IV.		2.28608	1.30232	0.0580219	1.30797	1.26214	G	A	FALSE	11	94	20.8617	30.8182	0.0890306	2	99	18.2626	15.5	0.0854167	0.622024	0	43	6.55814	0	0	0	0	0.110685	0.758601	0.647917	9	13	11	2R	9425691
brp	2R:9509069	FivePrimeUTR	GT	-	-	0.86838	0.636416	0	-	FBgn0259246	1	No	-	bruchpilot (brp) encodes a cytoskeletal protein critical for structural integrity of electron-dense projection (T-bar) at pre-active zones. It contributes to Ca[2+] channel clustering, size regulation of the synaptic vesicle readily releaseable pool and anesthesia-resistant memory formation.		4.91533	5.34215	0.729047	0.115732	0.0447217	G	T	FALSE	11	94	19.8191	38	0.0688036	9	92	22.0761	31.6667	0.103768	0.0704025	0	43	4.81395	0	0	0	0	0.231964	0.86838	0.636416	2	20	11	2R	9509069
brp	2R:9516731	FivePrimeUTR	GA	-	-	0.616048	0.46779	0	-	FBgn0259246	1	No	-	bruchpilot (brp) encodes a cytoskeletal protein critical for structural integrity of electron-dense projection (T-bar) at pre-active zones. It contributes to Ca[2+] channel clustering, size regulation of the synaptic vesicle readily releaseable pool and anesthesia-resistant memory formation.		4.91533	5.34215	0.729047	0.115732	0.0447217	G	A	FALSE	15	90	44.9556	57.2667	0.0764876	13	88	42.0341	55.5385	0.100721	0.244845	0	43	4.88372	0	0	0	0	0.148259	0.616048	0.46779	2	28	15	2R	9516731
Not1	2R:9578641	FivePrimeUTR	TC	-	-	0.679706	0.745907	0.535928	-	FBgn0085436	-1	No	-	Not1 (Not1) encodes a poly(A)-specific ribonuclease involved in translation inhibition and ovarian follicle cell development.		2.99304	3.29317	0.764791	2.76516	2.5559	A	G	FALSE	35	105	28.5048	41.1714	0.0460182	24	101	32.1782	36.9583	0.0589415	0.374433	25	43	28.6279	30.24	0.0243635	0.0166567	0.00164485	-0.0662004	-29.5603	-29.4941	11	59	10	2R	9578641
Urod	2R:9584699	FivePrimeUTR	CT	-	-	0.661561	0.81961	0.571429	-	FBgn0033428	1	No	-	Catalyzes the decarboxylation of four acetate groups of uroporphyrinogen-III to yield coproporphyrinogen-III. (UniProtKB:Q9V595)		3.41055	3.95204	0.828234	2.88007	2.74325	C	T	FALSE	9	96	24.9583	36.2222	0.122424	14	87	23.7701	29	0.0725037	0.248062	1	42	7.2381	14	0	0.821749	0.392846	-0.158048	-13.3384	-13.1804	-5	23	8	2R	9584699
Urod	2R:9585539	CDS	GA	M	L	0.599029	0.764163	0.54697	Missense	FBgn0033428	1	No	Uroporphyrinogen_deCOase	Catalyzes the decarboxylation of four acetate groups of uroporphyrinogen-III to yield coproporphyrinogen-III. (UniProtKB:Q9V595)	MQVFESSAEH	3.41055	3.95204	0.828234	2.88007	2.74325	G	A	FALSE	20	85	24.7647	41.65	0.0691759	23	78	25.1538	48.3478	0.0554845	0.0669219	5	38	7.84211	12.8	0.0786704	0.723386	0.0953367	-0.165134	-12.201	-12.0358	-3	43	15	2R	9585539
clos	2R:9587990	ThreePrimeUTR	TG	-	-	0.345915	0.292564	0.25696	-	FBgn0261016	-1	No	-	closca (clos) encodes a protein that is required, together with the products of fs(1)N and fs(1)M3, for their accumulation at the vitelline membrane and function in vitelline membrane integrity and Torso receptor activation.		0.0749458	0.125458	0.829861	0.0728188	0.0575285	A	C	FALSE	11	94	26.1596	27.5455	0.0348052	8	93	26.3011	21.5	0.0615837	0.431804	3	40	16.425	42.6667	0.0372741	0.232566	0.744702	0.0533511	-42.3208	-42.3741	3	19	8	2R	9587990
clos	2R:9587993	ThreePrimeUTR	GT	-	-	0.64487	0.592337	0.694502	-	FBgn0261016	-1	No	-	closca (clos) encodes a protein that is required, together with the products of fs(1)N and fs(1)M3, for their accumulation at the vitelline membrane and function in vitelline membrane integrity and Torso receptor activation.		0.0749458	0.125458	0.829861	0.0728188	0.0575285	C	A	FALSE	18	87	19.2644	17.2222	0.0499886	23	78	18.4359	16.1304	0.0462931	0.447902	8	35	10.0571	22.625	0.0501438	0.553245	0.23569	0.052533	-21.9801	-22.0327	-5	41	10	2R	9587993
Map60	2R:9591043	CDS	GA	M	L	0.726732	0.838967	0	Missense	FBgn0010342	1	No	-	Microtubule-associated protein 60 (Map60) encodes a microtubule binding protein that, together with gamma-tubulin and the product of Cp190, is a component of a centrosomal complex that can interact with microtubules.	MDKILQDIAK	2.2176	2.55991	0.185306	0.826267	0.945215	G	A	FALSE	11	105	8.09524	19.5455	0.0925122	11	101	14.6535	35.8182	0.0754576	0.35837	0	43	2.44186	0	0	0	0	-0.112235	0.726732	0.838967	0	22	11	2R	9591043
Map60	2R:9591377	CDS	CA	P	P	0.834284	0.83067	0	Silent	FBgn0010342	1	No	-	Microtubule-associated protein 60 (Map60) encodes a microtubule binding protein that, together with gamma-tubulin and the product of Cp190, is a component of a centrosomal complex that can interact with microtubules.	PMEEVEEYEM	2.2176	2.55991	0.185306	0.826267	0.945215	C	A	FALSE	22	105	10.2095	32.1364	0.0580202	17	101	18.2376	48.3529	0.062394	0.966642	0	43	2.69767	0	0	0	0	0.00361401	0.834284	0.83067	5	39	22	2R	9591377
Map60	2R:9591422	CDS	TC	P	P	0.826259	0.806971	0	Silent	FBgn0010342	1	No	-	Microtubule-associated protein 60 (Map60) encodes a microtubule binding protein that, together with gamma-tubulin and the product of Cp190, is a component of a centrosomal complex that can interact with microtubules.	PEDEDDAHQY	2.2176	2.55991	0.185306	0.826267	0.945215	T	C	FALSE	16	105	9.60952	22.6875	0.0659968	14	101	17.5446	43.2143	0.0751711	0.84784	0	43	2.46512	0	0	0	0	0.0192875	0.826259	0.806971	2	30	16	2R	9591422
Map60	2R:9591701	CDS	CT	S	S	0.801845	0.780044	0	Silent	FBgn0010342	1	No	-	Microtubule-associated protein 60 (Map60) encodes a microtubule binding protein that, together with gamma-tubulin and the product of Cp190, is a component of a centrosomal complex that can interact with microtubules.	SSAAAPKPAI	2.2176	2.55991	0.185306	0.826267	0.945215	C	T	FALSE	15	105	8.74286	17.1333	0.0670903	8	101	12.7921	28.5	0.0999908	0.85423	0	43	2.48837	0	0	0	0	0.0218002	0.801845	0.780044	7	23	15	2R	9591701
Map60	2R:9591946	CDS	TG	V	G	0.816754	0.757252	0	Missense	FBgn0010342	1	No	-	Microtubule-associated protein 60 (Map60) encodes a microtubule binding protein that, together with gamma-tubulin and the product of Cp190, is a component of a centrosomal complex that can interact with microtubules.	VVHTTTAQLM	2.2176	2.55991	0.185306	0.826267	0.945215	T	G	FALSE	15	105	10.3238	20.5333	0.0707847	11	101	15.4257	34.3636	0.0974468	0.616693	0	43	2.55814	0	0	0	0	0.0595017	0.816754	0.757252	4	26	15	2R	9591946
CG1902	2R:9603962	CDS	TG	V	V	0.792952	0.642101	0	Silent	FBgn0033434	1	No	-	Predicted to enable lipid transfer activity and phosphatidylinositol bisphosphate binding activity. Predicted to be involved in intermembrane lipid transfer. Predicted to be located in late endosome. Is expressed in adult head and organism. Human ortholog(s) of this gene implicated in familial isolated deficiency of vitamin E. Orthologous to human TTPA (alpha tocopherol transfer protein).	VAKIEALRTW	4.22058	3.69211	0.700445	1.77674	1.66021	T	G	FALSE	30	75	14.3733	35.9	0.0384212	11	90	13.3	23.4545	0.0919691	0.0802552	0	43	3.18605	0	0	0	0	0.150852	0.792952	0.642101	19	41	30	2R	9603962
CG1902	2R:9604798	CDS	CT	S	S	0.740728	0.806863	0	Silent	FBgn0033434	1	No	-	Predicted to enable lipid transfer activity and phosphatidylinositol bisphosphate binding activity. Predicted to be involved in intermembrane lipid transfer. Predicted to be located in late endosome. Is expressed in adult head and organism. Human ortholog(s) of this gene implicated in familial isolated deficiency of vitamin E. Orthologous to human TTPA (alpha tocopherol transfer protein).	SFSPYFTEDE	4.22058	3.69211	0.700445	1.77674	1.66021	C	T	FALSE	20	85	13.1176	38.3	0.0496117	10	91	13.6154	24.1	0.0709448	0.449576	0	43	3	0	0	0	0	-0.0661345	0.740728	0.806863	10	30	20	2R	9604798
GstT1	2R:9606672	CDS	AC	L	L	0.849871	0.888112	0.536414	Silent	FBgn0050000	1	No	GST_C	Glutathione S transferase T1 (GstT1) encodes an enzyme involved in glutathione metabolic processes.	LLERLWLEKD	2.3336	2.26915	0.930052	4.06165	3.64939	A	C	FALSE	17	88	11.6932	39	0.0551666	9	92	15.6413	38.8889	0.0743367	0.685085	6	37	9.21622	22.1667	0.0586165	0.00499887	0.0047481	-0.0382409	-21.3168	-21.2786	8	26	11	2R	9606672
GstT1	2R:9607005	ThreePrimeUTR	CA	-	-	0.836743	0.778276	0.452991	-	FBgn0050000	1	No	-	Glutathione S transferase T1 (GstT1) encodes an enzyme involved in glutathione metabolic processes.		2.3336	2.26915	0.930052	4.06165	3.64939	C	A	FALSE	16	89	12.1348	28.8125	0.0664	14	87	13.6322	25.8571	0.0861197	0.590213	3	40	7.075	19	0.109121	0.0301106	0.117465	0.058467	-18.1633	-18.2217	2	30	13	2R	9607005
Mmp2	2R:9611381	ThreePrimeUTR	CG	-	-	0.784293	0.639014	0.6	-	FBgn0033438	-1	No	-	Matrix metalloproteinase 2 (Mmp2) encodes a proteinase that cleaves proteins in the extracellular matrix. It contributes to remodeling the body plan during metamorphosis; matrix and tissue remodeling during axon fasciculation, dendritic reshaping, wound healing, and ovulation; and down-regulating follicle stem cell proliferation.		2.44143	2.47595	0.997965	1.41428	1.12782	G	C	FALSE	7	105	9.6381	44.4286	0.11869	12	101	16.1782	37.6667	0.0817218	0.313961	2	43	4.7907	13.5	0.266667	0.500734	0.864087	0.145279	-12.7157	-12.861	-5	19	5	2R	9611381
Uba1	2R:9691630	CDS	CT	A	V	0.717102	0.644437	0.454545	Missense	FBgn0023143	-1	No	ThiF_NAD_FAD-bd	Ubiquitin activating enzyme 1 (Uba1) encodes an E1 enzyme involved in protein ubiquitylation. It contributes to multiple processes including regulation of Ras-ERK signaling, autophagy, apoptosis and tissue growth.	AQLAELNNYV	4.58023	4.88416	0.433921	3.14724	3.06775	G	A	FALSE	18	87	7.27586	23.5556	0.0790642	20	81	11.8765	32.9	0.0589393	0.460308	1	42	4	11	0	0.456593	0.490545	0.0726647	-10.2829	-10.3556	-2	38	17	2R	9691630
sqa	2R:9719090	CDS	GA	R	R	0.576687	0.713415	0.475702	Silent	FBgn0259678	-1	No	-	spaghetti-squash activator (sqa) encodes a myosin light chain kinase-like protein. It is a substrate of the kinase encoded by Atg1 and is required for starvation-induced autophagy.	RRTHGADSLS	0.884858	1.20865	0.955242	3.63639	3.51006	C	T	FALSE	5	100	6.81	74.6	0.174804	2	99	8.29293	75	0.286585	0.695359	16	27	10.6296	20.875	0.0306603	0.359402	0.0592765	-0.136728	-20.2983	-20.1616	3	7	-11	2R	9719090
PCB	2R:9850716	ThreePrimeUTR	AT	-	-	0.845978	0.880173	0.689917	-	FBgn0027580	-1	No	-	Pyruvate carboxylase (PCB) encodes an enzyme that regulates D-serine levels.		2.95692	2.68262	0.927092	2.30749	1.93229	T	A	FALSE	20	85	12.8118	25.65	0.0448361	10	91	13.7802	30.8	0.0451984	0.63503	3	40	6.275	23	0.0837473	0.212229	0.0688138	-0.034195	-22.154	-22.1198	10	30	17	2R	9850716
PCB	2R:9850937	ThreePrimeUTR	TC	-	-	0.812868	0.771098	0.595433	-	FBgn0027580	-1	No	-	Pyruvate carboxylase (PCB) encodes an enzyme that regulates D-serine levels.		2.95692	2.68262	0.927092	2.30749	1.93229	A	G	FALSE	30	75	19.1867	54.0333	0.049444	12	89	21.9663	61.6667	0.0764805	0.652104	10	33	7.57576	21	0.034706	0.0187702	0.0646665	0.0417698	-20.1871	-20.2289	18	42	20	2R	9850937
PCB	2R:9851007	ThreePrimeUTR	GT	-	-	0.825895	0.74026	0.5682	-	FBgn0027580	-1	No	-	Pyruvate carboxylase (PCB) encodes an enzyme that regulates D-serine levels.		2.95692	2.68262	0.927092	2.30749	1.93229	C	A	FALSE	26	79	18.0633	49	0.0489985	10	91	19.6264	70.1	0.0784298	0.362564	10	33	7	17.8	0.0453305	0.00433967	0.0736599	0.0856345	-16.9741	-17.0597	16	36	16	2R	9851007
Sec24AB	2R:9876501	ThreePrimeUTR	CA	-	-	0.924969	0.903848	0	-	FBgn0033460	-1	No	-	Predicted to enable SNARE binding activity; signal sequence binding activity; and zinc ion binding activity. Predicted to be involved in COPII-coated vesicle cargo loading. Predicted to be part of COPII vesicle coat. Predicted to be active in endoplasmic reticulum exit site. Is expressed in adult head. Orthologous to several human genes including SEC24A (SEC24 homolog A, COPII coat complex compon…		2.27312	3.10382	0.435533	1.1652	1.09224	G	T	FALSE	14	91	14.6374	36.4286	0.0500444	16	85	17.5647	32.6875	0.0374347	0.734059	0	43	4.86047	0	0	0	0	0.0211214	0.924969	0.903848	-2	30	14	2R	9876501
Sec24AB	2R:9876930	ThreePrimeUTR	TA	-	-	0.93373	0.91422	0	-	FBgn0033460	-1	No	-	Predicted to enable SNARE binding activity; signal sequence binding activity; and zinc ion binding activity. Predicted to be involved in COPII-coated vesicle cargo loading. Predicted to be part of COPII vesicle coat. Predicted to be active in endoplasmic reticulum exit site. Is expressed in adult head. Orthologous to several human genes including SEC24A (SEC24 homolog A, COPII coat complex compon…		2.27312	3.10382	0.435533	1.1652	1.09224	A	T	FALSE	14	91	13.6813	47.0714	0.0361755	15	86	17.3721	33.2	0.0505113	0.75887	0	43	5.02326	0	0	0	0	0.0195103	0.93373	0.91422	-1	29	14	2R	9876930
Mef2	2R:9958705	FivePrimeUTR	TG	-	-	0.945437	1	0	-	FBgn0011656	-1	No	-	Myocyte enhancer factor 2 (Mef2) encodes a protein that belongs to the MADS-box family of transcription factors and is required for muscle development. It directly activates a large number of muscle protein genes. It also regulates gene expression in other tissues, including the fat body and neural tissue.		2.39142	1.46708	0.149041	2.04553	1.8255	A	C	FALSE	12	93	20.4409	27.9167	0.0484341	4	97	23.6907	40.25	0	0.535378	0	43	7.2093	0	0	0	0	-0.0545635	0.945437	1	8	16	12	2R	9958705
eIF3j	2R:9970813	ThreePrimeUTR	CT	-	-	0.689279	0.545544	0.570639	-	FBgn0027619	1	No	-	Component of the eukaryotic translation initiation factor 3 (eIF-3) complex, which is involved in protein synthesis of a specialized repertoire of mRNAs and, together with other initiation factors, stimulates binding of mRNA and methionyl-tRNAi to the 40S ribosome. The eIF-3 complex specifically targets and initiates translation of a subset of mRNAs involved in cell proliferation. (UniProtKB:Q7K5…		5.4597	5.5939	0.988818	4.059	3.83654	C	T	FALSE	44	61	40.8197	54.2727	0.0389791	43	58	46.1207	73.0698	0.0356164	0.0079365	9	34	11.4118	22.5556	0.0458046	0.188976	0.758015	0.143735	-21.8663	-22.01	1	87	35	2R	9970813
Pka-R2	2R:9993968	ThreePrimeUTR	AC	-	-	0.742168	0.722485	0	-	FBgn0022382	-1	No	-	Regulatory subunit of the cAMP-dependent protein kinases involved in cAMP signaling in cells (PubMed:10781603, PubMed:9196067). Mediates membrane association by binding to anchoring proteins, such as Akap200 (PubMed:9196067, PubMed:12223401). Might play an essential role in the regulation of neuronal activity in the brain (PubMed:10781603, PubMed:9196067). (UniProtKB:P81900)		4.61114	4.8641	0.950267	2.30218	2.12679	T	G	FALSE	24	81	22.8765	32.5417	0.0626837	20	81	26.7407	28.35	0.0599433	0.82376	0	43	6.34884	0	0	0	0	0.0196831	0.742168	0.722485	4	44	24	2R	9993968
sel	2R:10051845	CDS	GA	M	L	0.713575	0.85989	0.393817	Missense	FBgn0263260	-1	No	-	seele (sel) encodes an endoplasmic reticulum-resident Saposin-like protein. It is involved in dorsal-ventral patterning by contributing to secretion and activation of the protease encoded by ea.	MAQGYSFTSR	1.83042	2.02485	0.715167	2.2778	2.06395	C	T	FALSE	14	91	20.2857	56.4286	0.0739337	11	90	24.7667	74	0.0766271	0.187127	4	39	7.92308	24.25	0.107932	0.0501901	0.00636482	-0.146314	-23.5364	-23.3901	3	25	10	2R	10051845
CG2269	2R:10090645	CDS	GC	M	F	0.65974	0.695047	0	Missense	FBgn0033484	1	No	-	Is expressed in adult head.	MVLLAVVQCI	5.19569	6.43794	0.0154284	0.210855	0.230656	G	C	FALSE	39	66	28.2121	49.5897	0.0468504	39	62	39.1129	46.3333	0.0413254	0.57362	0	43	7.11628	0	0	0	0	-0.0353076	0.65974	0.695047	0	78	39	2R	10090645
CG2269	2R:10094332	CDS	GA	K	K	0.671665	0.603185	0	Silent	FBgn0033484	1	No	-	Is expressed in adult head.	KKLQSIEDFI	5.19569	6.43794	0.0154284	0.210855	0.230656	G	A	FALSE	36	69	33.6087	53.8611	0.0476376	33	68	48.75	76.4242	0.0443065	0.298741	0	43	7.13953	0	0	0	0	0.0684799	0.671665	0.603185	3	69	36	2R	10094332
CG2269	2R:10094389	CDS	AC	A	A	0.645832	0.591859	0	Silent	FBgn0033484	1	No	-	Is expressed in adult head.	AHEGLNSKDD	5.19569	6.43794	0.0154284	0.210855	0.230656	A	C	FALSE	39	66	31.697	54.3077	0.0497192	37	64	50.7344	76.4054	0.046658	0.432227	0	43	7.13953	0	0	0	0	0.0539732	0.645832	0.591859	2	76	39	2R	10094389
Pfk	2R:10116445	CDS	GA	Q	Q	0.571116	0.671596	0.54324	Silent	FBgn0003071	1	No	Phosphofructokinase_dom	Catalyzes the phosphorylation of D-fructose 6-phosphate to fructose 1,6-bisphosphate by ATP, the first committing step of glycolysis. (UniProtKB:P52034)	QQGGSPTPFD	4.37009	3.56083	0.31389	3.82933	4.24604	G	A	FALSE	34	71	28.1127	54.2353	0.0512725	17	84	17.631	42.2941	0.0745533	0.26774	19	24	7.5	43.4211	0.0322129	0.703799	0.110051	-0.100479	-42.8499	-42.7495	17	51	15	2R	10116445
Pfk	2R:10117050	ThreePrimeUTR	GT	-	-	0.57201	0.740485	0.474469	-	FBgn0003071	1	No	-	Catalyzes the phosphorylation of D-fructose 6-phosphate to fructose 1,6-bisphosphate by ATP, the first committing step of glycolysis. (UniProtKB:P52034)		4.37009	3.56083	0.31389	3.82933	4.24604	G	T	FALSE	37	68	44.6618	81.2973	0.0410526	17	84	32.8095	61.6471	0.0609004	0.0255738	24	19	11.1053	54.25	0.0167395	0.0699974	1.95577e-05	-0.168474	-53.678	-53.5095	20	54	13	2R	10117050
mlt	2R:10156508	ThreePrimeUTR	CA	-	-	0.719354	0.695241	0	-	FBgn0265512	-1	No	-	mulet (mlt) encodes a tubulin-specific chaperone E-like protein involved in sperm individualization and regulation of microtubule depolymerization.		2.16804	2.99134	0.234003	1.30167	1.41238	G	T	FALSE	19	105	15.5619	33.9474	0.0732147	20	101	26.297	53.9	0.0558929	0.793676	0	43	5.93023	0	0	0	0	0.0241128	0.719354	0.695241	-1	39	19	2R	10156508
mlt	2R:10157534	CDS	CT	N	N	0.800367	0.689621	0	Silent	FBgn0265512	-1	No	-	mulet (mlt) encodes a tubulin-specific chaperone E-like protein involved in sperm individualization and regulation of microtubule depolymerization.	NYRQVLIDAE	2.16804	2.99134	0.234003	1.30167	1.41238	G	A	FALSE	10	105	10.7143	21.2	0.0845658	15	101	15.2574	42.1333	0.0703332	0.326298	0	43	4.7907	0	0	0	0	0.110747	0.800367	0.689621	-5	25	10	2R	10157534
mlt	2R:10158075	FivePrimeUTR	GA	-	-	0.834848	0.747124	0	-	FBgn0265512	-1	No	-	mulet (mlt) encodes a tubulin-specific chaperone E-like protein involved in sperm individualization and regulation of microtubule depolymerization.		2.16804	2.99134	0.234003	1.30167	1.41238	C	T	FALSE	11	105	11.181	20.0909	0.0621592	15	101	13.9505	33.8	0.0756246	0.404262	0	43	4.37209	0	0	0	0	0.0877239	0.834848	0.747124	-4	26	11	2R	10158075
CAP	2R:10306843	ThreePrimeUTR	AT	-	-	0.794528	0.835106	0.458456	-	FBgn0033504	1	No	-	CAP (CAP) encodes a protein that localizes to focal adhesions and associates with proteins that regulate cytoskeletal organization, including the product of Vinc. It regulates the assembly and function of two actin-rich structures: the larval muscle attachment site, and the fly chordotonal organs in the larval body wall and in the adult Johnston's organ.		1.60928	1.51636	0.943416	3.279	3.44533	A	T	FALSE	11	94	8.88298	25.9091	0.078072	4	97	7.68041	22.75	0.164894	0.805749	4	39	8.76923	30.25	0.0490281	0.0275225	0.0711267	-0.040578	-29.4555	-29.4149	7	15	7	2R	10306843
RNaseZ	2R:10307183	ThreePrimeUTR	CG	-	-	0.701598	1	0	-	FBgn0028426	-1	No	-	Ribonuclease Z (RNaseZ) is a highly conserved gene that encodes the endoribonuclease RNase Z, which cleaves pre-tRNA molecules directly 3' to the discriminator. It has at least two biological roles - nuclear pre-tRNA processing and mitochondrial primary transcript processing.		0.912224	0.704883	0.672113	0.569709	0.392617	G	C	FALSE	13	92	9.29348	28.2308	0.0736367	7	94	9.35106	46.2857	0	0.00882639	0	43	5.16279	0	0	0	0	-0.298402	0.701598	1	6	20	13	2R	10307183
RNaseZ	2R:10307378	CDS	CT	T	M	0.897463	1	0.25	Missense	FBgn0028426	-1	No	-	Ribonuclease Z (RNaseZ) is a highly conserved gene that encodes the endoribonuclease RNase Z, which cleaves pre-tRNA molecules directly 3' to the discriminator. It has at least two biological roles - nuclear pre-tRNA processing and mitochondrial primary transcript processing.	TEELEQRAVK	0.912224	0.704883	0.672113	0.569709	0.392617	G	A	FALSE	13	92	6.81522	29.9231	0.056823	8	93	9.51613	30.625	0	0.177201	1	42	5	12	0	0.0101737	0	-0.102537	-11.1025	-11	5	21	12	2R	10307378
Ndg	2R:10320814	CDS	CT	P	P	1	0.4	0.528855	Silent	FBgn0026403	1	No	LDLR_classB_rpt	Cell adhesion glycoprotein which is widely distributed in basement membranes (PubMed:30260959, PubMed:30567930). Involved in cell-extracellular matrix (ECM) interactions probably by connecting the laminin and collagen IV networks (PubMed:30260959, PubMed:30567930). Required for permeability and mechanical stability of basement membranes, and ECM dependent neural plasticity (PubMed:30567930). Not …	PFITTDIESP	0.77305	0.567289	0.873393	3.77091	3.35263	C	T	FALSE	3	102	5.79412	53.6667	0	1	100	5.18	15	0	0	12	31	6.64516	30.5	0.0421531	0.000114309	0.414611	0.6	-29.5	-30.1	2	4	-9	2R	10320814
Ndg	2R:10321308	CDS	CT	P	S	1	0.871212	0.491421	Missense	FBgn0026403	1	No	-	Cell adhesion glycoprotein which is widely distributed in basement membranes (PubMed:30260959, PubMed:30567930). Involved in cell-extracellular matrix (ECM) interactions probably by connecting the laminin and collagen IV networks (PubMed:30260959, PubMed:30567930). Required for permeability and mechanical stability of basement membranes, and ECM dependent neural plasticity (PubMed:30567930). Not …	PQNRQIRTIS	0.77305	0.567289	0.873393	3.77091	3.35263	C	T	FALSE	5	100	8.45	36.4	0	2	99	5.72727	60.5	0.00757576	5.48854e-07	19	24	9.375	33.6842	0.0184065	2.11831e-12	2.91423e-06	0.128788	-32.6842	-32.813	3	7	-14	2R	10321308
RanBPM	2R:10435935	ThreePrimeUTR	CG	-	-	0.8738	0.829476	0.571866	-	FBgn0262114	1	No	-	Ran-binding protein M (RanBPM) encodes a protein involved in cell adhesion that regulates the shape, size, and organization of the germline stem cell niche in the ovary.		2.54261	3.30689	0.357887	2.3146	1.90356	C	G	FALSE	14	91	11.989	24.7143	0.0694979	23	78	14.8333	35.1739	0.0582114	0.633986	6	37	27.8649	14.1667	0.0662143	0.0176675	0.0407513	0.0443231	-13.2929	-13.3372	-9	37	8	2R	10435935
RanBPM	2R:10435945	ThreePrimeUTR	AC	-	-	0.850786	0.820742	0.523296	-	FBgn0262114	1	No	-	Ran-binding protein M (RanBPM) encodes a protein involved in cell adhesion that regulates the shape, size, and organization of the germline stem cell niche in the ovary.		2.54261	3.30689	0.357887	2.3146	1.90356	A	C	FALSE	11	94	13.5	28.5455	0.0877953	23	78	15.8205	36	0.0591308	0.776288	4	39	27.2564	16	0.0962283	0.0594542	0.0562417	0.0300432	-15.1492	-15.1793	-12	34	7	2R	10435945
CG12895	2R:10436706	ThreePrimeUTR	TA	-	-	0.688136	0.803511	0.454545	-	FBgn0033523	-1	No	-	Plays an essential role in the assembly of succinate dehydrogenase (SDH), an enzyme complex (also referred to as respiratory complex II) that is a component of both the tricarboxylic acid (TCA) cycle and the mitochondrial electron transport chain, and which couples the oxidation of succinate to fumarate with the reduction of ubiquinone (coenzyme Q) to ubiquinol. Required for flavinylation (covale…		3.13455	2.82307	0.699678	3.00234	2.89476	A	T	FALSE	13	92	14.9891	20.4615	0.0876093	9	92	10.1413	18.4444	0.0707847	0.351842	1	42	21.6429	11	0	0.489723	0.157617	-0.115375	-10.3119	-10.1965	4	22	12	2R	10436706
Galphao	2R:10461755	ThreePrimeUTR	TC	-	-	0.744004	0.677216	0	-	FBgn0001122	1	No	-	G protein alpha o subunit (Galphao) encodes the most abundant G protein in the nervous tissue and is involved in signaling by a variety of GPCRs. It contributes to heart development, axonogenesis, neuro-muscular junction formation, asymmetric cell division, planar cell polarity, blood-brain barrier establishment, Wnt signaling, and gustatory and olfactory sensory perception.		5.27539	5.64569	0.388493	0.648983	0.676221	T	C	FALSE	27	78	16.7436	39.0741	0.0546044	20	81	20.2099	42.3	0.0702847	0.449944	0	43	19.8605	0	0	0	0	0.0667882	0.744004	0.677216	7	47	27	2R	10461755
Galphao	2R:10462557	ThreePrimeUTR	GC	-	-	0.896618	0.881833	0	-	FBgn0001122	1	No	-	G protein alpha o subunit (Galphao) encodes the most abundant G protein in the nervous tissue and is involved in signaling by a variety of GPCRs. It contributes to heart development, axonogenesis, neuro-muscular junction formation, asymmetric cell division, planar cell polarity, blood-brain barrier establishment, Wnt signaling, and gustatory and olfactory sensory perception.		5.27539	5.64569	0.388493	0.648983	0.676221	G	C	FALSE	5	100	12.83	51.8	0.0965871	13	88	16.3636	38.7692	0.0451636	0.876293	0	43	19.6279	0	0	0	0	0.0147852	0.896618	0.881833	-8	18	5	2R	10462557
Galphao	2R:10463844	ThreePrimeUTR	GA	-	-	0.373285	0.59428	0	-	FBgn0001122	1	No	-	G protein alpha o subunit (Galphao) encodes the most abundant G protein in the nervous tissue and is involved in signaling by a variety of GPCRs. It contributes to heart development, axonogenesis, neuro-muscular junction formation, asymmetric cell division, planar cell polarity, blood-brain barrier establishment, Wnt signaling, and gustatory and olfactory sensory perception.		5.27539	5.64569	0.388493	0.648983	0.676221	G	A	FALSE	4	101	58.9109	86.75	0.0761293	14	87	76.2644	71.4286	0.062215	0.0953916	0	43	20.3953	0	0	0	0	-0.220995	0.373285	0.59428	-10	18	4	2R	10463844
Galphao	2R:10464906	ThreePrimeUTR	GA	-	-	0.759698	0.804383	0	-	FBgn0001122	1	No	-	G protein alpha o subunit (Galphao) encodes the most abundant G protein in the nervous tissue and is involved in signaling by a variety of GPCRs. It contributes to heart development, axonogenesis, neuro-muscular junction formation, asymmetric cell division, planar cell polarity, blood-brain barrier establishment, Wnt signaling, and gustatory and olfactory sensory perception.		5.27539	5.64569	0.388493	0.648983	0.676221	G	A	FALSE	13	92	13.8043	41.6923	0.0918268	15	86	18.2093	36.2	0.0640912	0.687026	0	43	19.3953	0	0	0	0	-0.044685	0.759698	0.804383	-2	28	13	2R	10464906
Galphao	2R:10465094	ThreePrimeUTR	TC	-	-	0.646362	0.70405	0	-	FBgn0001122	1	No	-	G protein alpha o subunit (Galphao) encodes the most abundant G protein in the nervous tissue and is involved in signaling by a variety of GPCRs. It contributes to heart development, axonogenesis, neuro-muscular junction formation, asymmetric cell division, planar cell polarity, blood-brain barrier establishment, Wnt signaling, and gustatory and olfactory sensory perception.		5.27539	5.64569	0.388493	0.648983	0.676221	T	C	FALSE	9	96	22.8021	45.7778	0.104955	15	86	29.4651	44.0667	0.0710152	0.641894	0	43	19.5116	0	0	0	0	-0.0576889	0.646362	0.70405	-6	24	9	2R	10465094
Pef	2R:10481675	ThreePrimeUTR	TG	-	-	0.60991	0.556499	0	-	FBgn0033529	1	No	-	Predicted to enable calcium ion binding activity. Predicted to be involved in COPII vesicle coating. Is expressed in several structures, including adult heart; anterior endoderm anlage; embryonic/larval midgut; germ layer; and presumptive embryonic/larval system. Orthologous to human PEF1 (penta-EF-hand domain containing 1).		6.16521	6.2731	0.743747	3.74954	3.7186	T	G	FALSE	5	100	57.73	122.2	0.105278	13	88	63.9318	47.0769	0.0716138	0.693255	0	43	26.9302	0	0	0	0	0.0534114	0.60991	0.556499	-8	18	5	2R	10481675
Pef	2R:10481682	ThreePrimeUTR	AT	-	-	0.578554	0.535154	0.454545	-	FBgn0033529	1	No	-	Predicted to enable calcium ion binding activity. Predicted to be involved in COPII vesicle coating. Is expressed in several structures, including adult heart; anterior endoderm anlage; embryonic/larval midgut; germ layer; and presumptive embryonic/larval system. Orthologous to human PEF1 (penta-EF-hand domain containing 1).		6.16521	6.2731	0.743747	3.74954	3.7186	A	T	FALSE	5	100	57.45	116	0.10812	13	88	63.5455	45.9231	0.0728416	0.75297	1	42	27.0952	11	0	0.663988	0.772469	0.0433998	-10.4214	-10.4648	-8	18	4	2R	10481682
wde	2R:10804550	CDS	AT	K	I	0.739886	0.84609	0	Missense	FBgn0027499	-1	No	-	windei (wde) encodes a chromatin-associated protein that functions as an essential cofactor and binding partner for the methyl transferase encoded by egg. It also binds to the chromosome 4-specific protein encoded by Pof. wde product is required for survival of female germ line cells.	KEPMLVGDEV	2.05105	2.37689	0.751554	0.762529	0.689263	T	A	FALSE	9	96	6.69792	24.3333	0.11264	16	85	6.36471	32.4375	0.0622472	0.377277	0	43	2.69767	0	0	0	0	-0.106204	0.739886	0.84609	-7	25	9	2R	10804550
wde	2R:10805304	CDS	GT	D	Y	0.714518	0.767483	0.666667	Missense	FBgn0027499	-1	No	-	windei (wde) encodes a chromatin-associated protein that functions as an essential cofactor and binding partner for the methyl transferase encoded by egg. It also binds to the chromosome 4-specific protein encoded by Pof. wde product is required for survival of female germ line cells.	DSLDRDEECD	2.05105	2.37689	0.751554	0.762529	0.689263	C	A	FALSE	17	88	8.76136	28.4706	0.0739803	23	78	6.70513	38.3478	0.0577671	0.57023	1	42	2.57143	18	0	0.880735	0.725054	-0.0529652	-17.2855	-17.2325	-6	40	16	2R	10805304
wde	2R:10805625	CDS	GA	R	Q	0.763892	0.730073	0.473684	Missense	FBgn0027499	-1	No	-	windei (wde) encodes a chromatin-associated protein that functions as an essential cofactor and binding partner for the methyl transferase encoded by egg. It also binds to the chromosome 4-specific protein encoded by Pof. wde product is required for survival of female germ line cells.	RTLSTELGNE	2.05105	2.37689	0.751554	0.762529	0.689263	C	T	FALSE	19	86	8.87209	30.8947	0.0704911	23	78	6.65385	47.4783	0.0560325	0.705601	1	42	2.83333	19	0	0.369445	0.360435	0.0338187	-18.2361	-18.2699	-4	42	18	2R	10805625
CG12935	2R:10810273	CDS	CA	V	V	0.929342	0.72624	0	Silent	FBgn0033547	1	No	TMEM70/TMEM186/TMEM223	Involved in nervous system development. Predicted to be active in mitochondrion. Is expressed in adult head and adult heart. Orthologous to human TMEM223 (transmembrane protein 223).	VWMFTLRSVR	1.52238	1.28173	0.748525	1.03816	0.429025	C	A	FALSE	17	88	5.71591	38.5882	0.0466179	8	93	6.98925	48.125	0.0927109	0.0386223	0	43	2.48837	0	0	0	0	0.203102	0.929342	0.72624	9	25	17	2R	10810273
CG12935	2R:10810327	CDS	GA	Q	Q	0.912455	0.723782	0	Silent	FBgn0033547	1	No	TMEM70/TMEM186/TMEM223	Involved in nervous system development. Predicted to be active in mitochondrion. Is expressed in adult head and adult heart. Orthologous to human TMEM223 (transmembrane protein 223).	QSVSFVTYGP	1.52238	1.28173	0.748525	1.03816	0.429025	G	A	FALSE	16	89	4.98876	28.5	0.0588135	5	96	7.16667	50.4	0.146477	0.16884	0	43	2.44186	0	0	0	0	0.188673	0.912455	0.723782	11	21	16	2R	10810327
RpS15Ab	2R:10821796	FivePrimeUTR	GT	-	-	0.408738	0.457272	0.390904	-	FBgn0033555	1	No	-	Predicted to be a structural constituent of ribosome. Predicted to be involved in cytoplasmic translation. Predicted to be located in ribosome. Predicted to be part of cytosolic small ribosomal subunit. Is expressed in several structures, including embryonic/larval midgut; foregut primordium; mesoderm; posterior ectoderm derivative; and presumptive embryonic/larval digestive system. Human ortholo…		3.76529	3.1313	0.134754	5.69163	5.75158	G	T	FALSE	20	85	21.0824	28.7	0.0700966	17	84	12.9524	22.9412	0.0825063	0.654517	11	32	12.375	18.3636	0.060907	0.866487	0.565717	-0.0485338	-17.9549	-17.9064	3	37	9	2R	10821796
RpS15Ab	2R:10821843	CDS	CT	M	M	0.378529	0.358917	0.273105	Silent	FBgn0033555	1	No	Ribosomal_uS8	Predicted to be a structural constituent of ribosome. Predicted to be involved in cytoplasmic translation. Predicted to be located in ribosome. Predicted to be part of cytosolic small ribosomal subunit. Is expressed in several structures, including embryonic/larval midgut; foregut primordium; mesoderm; posterior ectoderm derivative; and presumptive embryonic/larval digestive system. Human ortholo…	MKCINNAEKR	3.76529	3.1313	0.134754	5.69163	5.75158	C	T	FALSE	19	86	29.5349	39.7368	0.0764635	17	84	19.1667	26.8824	0.0754449	0.856771	29	14	15.7857	34.5862	0.0224886	0.125511	0.189907	0.0196123	-34.2077	-34.2273	2	36	-10	2R	10821843
RpS15Ab	2R:10821974	CDS	GC	E	D	0.187451	0.19606	0.237585	Missense	FBgn0033555	1	No	Ribosomal_uS8	Predicted to be a structural constituent of ribosome. Predicted to be involved in cytoplasmic translation. Predicted to be located in ribosome. Predicted to be part of cytosolic small ribosomal subunit. Is expressed in several structures, including embryonic/larval midgut; foregut primordium; mesoderm; posterior ectoderm derivative; and presumptive embryonic/larval digestive system. Human ortholo…	EDHRAGKIVV	3.76529	3.1313	0.134754	5.69163	5.75158	G	C	FALSE	13	92	28.3913	40.4615	0.022685	7	94	15.7553	27	0.0266773	0.817058	16	27	20.2222	35.6875	0.0301197	0.21212	0.408255	-0.00860955	-35.5	-35.4914	6	20	-3	2R	10821974
RpS15Ab	2R:10821980	CDS	CT	H	H	0.185438	0.201764	0.279377	Silent	FBgn0033555	1	No	Ribosomal_uS8	Predicted to be a structural constituent of ribosome. Predicted to be involved in cytoplasmic translation. Predicted to be located in ribosome. Predicted to be part of cytosolic small ribosomal subunit. Is expressed in several structures, including embryonic/larval midgut; foregut primordium; mesoderm; posterior ectoderm derivative; and presumptive embryonic/larval digestive system. Human ortholo…	HRAGKIVVNL	3.76529	3.1313	0.134754	5.69163	5.75158	C	T	FALSE	11	94	24.5745	39.6364	0.0238742	8	93	14.2688	22.375	0.0276989	0.661452	17	26	17.5	33.5882	0.030843	0.0382306	0.127648	-0.0163266	-33.4028	-33.3865	3	19	-6	2R	10821980
RpS15Ab	2R:10821984	CDS	GT	A	S	0.188238	0.202793	0.266495	Missense	FBgn0033555	1	No	Ribosomal_uS8	Predicted to be a structural constituent of ribosome. Predicted to be involved in cytoplasmic translation. Predicted to be located in ribosome. Predicted to be part of cytosolic small ribosomal subunit. Is expressed in several structures, including embryonic/larval midgut; foregut primordium; mesoderm; posterior ectoderm derivative; and presumptive embryonic/larval digestive system. Human ortholo…	AGKIVVNLTG	3.76529	3.1313	0.134754	5.69163	5.75158	G	T	FALSE	10	95	23.9789	36.6	0.0258856	7	94	13.7766	21.2857	0.0235844	0.698077	12	31	23.5806	31.0833	0.0397208	0.130436	0.267074	-0.0145546	-30.8951	-30.8805	3	17	-2	2R	10821984
RpS15Ab	2R:10822054	CDS	CT	A	V	0.230391	0.285078	0.222683	Missense	FBgn0033555	1	No	Ribosomal_uS8	Predicted to be a structural constituent of ribosome. Predicted to be involved in cytoplasmic translation. Predicted to be located in ribosome. Predicted to be part of cytosolic small ribosomal subunit. Is expressed in several structures, including embryonic/larval midgut; foregut primordium; mesoderm; posterior ectoderm derivative; and presumptive embryonic/larval digestive system. Human ortholo…	APINDIEKWT	3.76529	3.1313	0.134754	5.69163	5.75158	C	T	FALSE	9	96	27.5	25.7778	0.0239747	4	97	17.0309	18.5	0.0863296	0.421749	14	29	29.2414	33	0.0242824	0.8323	0.33574	-0.0546875	-32.7696	-32.7149	5	13	-5	2R	10822054
RpS15Ab	2R:10822076	CDS	GA	K	K	0.34742	0.38814	0.324253	Silent	FBgn0033555	1	No	Ribosomal_uS8	Predicted to be a structural constituent of ribosome. Predicted to be involved in cytoplasmic translation. Predicted to be located in ribosome. Predicted to be part of cytosolic small ribosomal subunit. Is expressed in several structures, including embryonic/larval midgut; foregut primordium; mesoderm; posterior ectoderm derivative; and presumptive embryonic/larval digestive system. Human ortholo…	KWTNNLLPSR	3.76529	3.1313	0.134754	5.69163	5.75158	G	A	FALSE	36	69	28.1014	42.3333	0.0452053	29	72	15.1944	31.2414	0.0555979	0.567733	30	13	19.6154	36.8333	0.0250995	0.672804	0.294002	-0.0407192	-36.4859	-36.4452	7	65	6	2R	10822076
RpS15Ab	2R:10822209	ThreePrimeUTR	CA	-	-	0.328071	0.412282	0.296314	-	FBgn0033555	1	No	-	Predicted to be a structural constituent of ribosome. Predicted to be involved in cytoplasmic translation. Predicted to be located in ribosome. Predicted to be part of cytosolic small ribosomal subunit. Is expressed in several structures, including embryonic/larval midgut; foregut primordium; mesoderm; posterior ectoderm derivative; and presumptive embryonic/larval digestive system. Human ortholo…		3.76529	3.1313	0.134754	5.69163	5.75158	C	A	FALSE	41	64	19.0781	41.2927	0.0380025	33	68	13.4412	26.6061	0.0513631	0.18259	32	11	10.5455	36.375	0.0269783	0.520815	0.0519737	-0.0842111	-36.0469	-35.9627	8	74	9	2R	10822209
RpS15Ab	2R:10822278	ThreePrimeUTR	TA	-	-	0.230388	0.229529	0.259032	-	FBgn0033555	1	No	-	Predicted to be a structural constituent of ribosome. Predicted to be involved in cytoplasmic translation. Predicted to be located in ribosome. Predicted to be part of cytosolic small ribosomal subunit. Is expressed in several structures, including embryonic/larval midgut; foregut primordium; mesoderm; posterior ectoderm derivative; and presumptive embryonic/larval digestive system. Human ortholo…		3.76529	3.1313	0.134754	5.69163	5.75158	T	A	FALSE	4	101	23.5446	49.5	0.0409361	7	94	14.1809	19.8571	0.0407475	0.989362	22	21	15.5714	37.6818	0.0193541	0.562426	0.479566	0.000858467	-37.4514	-37.4523	-3	11	-18	2R	10822278
nclb	2R:10876325	CDS	CT	T	T	0.81739	0.801629	0	Silent	FBgn0263510	1	No	-	Chromatin-associated factor that regulates transcription (PubMed:21752937). Regulates Pol I-mediated rRNA biogenesis and, probably, Pol III-mediated transcription (PubMed:29065309). Regulates the localization to the nucleolus of Cdk7, a regulator of the Pol I-elongation factor TFIIH (PubMed:29065309). Acts as regulator of cell proliferation and tissue growth as part of the TORC1 and Myc signaling…	THHDFLLPSF	2.63709	1.58521	0.250542	0.492658	0.759112	C	T	FALSE	22	83	8.75904	35.0455	0.0415382	6	95	5.4	31.1667	0.130259	0.879825	0	43	1.55814	0	0	0	0	0.0157617	0.81739	0.801629	16	28	22	2R	10876325
nclb	2R:10877045	CDS	GC	K	N	0.797689	0.832146	0	Missense	FBgn0263510	1	No	-	Chromatin-associated factor that regulates transcription (PubMed:21752937). Regulates Pol I-mediated rRNA biogenesis and, probably, Pol III-mediated transcription (PubMed:29065309). Regulates the localization to the nucleolus of Cdk7, a regulator of the Pol I-elongation factor TFIIH (PubMed:29065309). Acts as regulator of cell proliferation and tissue growth as part of the TORC1 and Myc signaling…	KHVYEHEFNM	2.63709	1.58521	0.250542	0.492658	0.759112	G	C	FALSE	23	82	15.4146	36.5217	0.0497109	11	90	6.62222	26.9091	0.0862927	0.714113	0	43	1.65116	0	0	0	0	-0.0344568	0.797689	0.832146	12	34	23	2R	10877045
ND-B14	2R:10897181	ThreePrimeUTR	TC	-	-	0.607737	0.728587	0.381107	-	FBgn0033570	-1	No	-	Predicted to be involved in mitochondrial respiratory chain complex I assembly and response to oxidative stress. Located in mitochondrion. Is expressed in several structures, including embryonic Malpighian tubule; embryonic/larval muscle system; germ layer; germ layer derivative; and gut section. Human ortholog(s) of this gene implicated in nuclear type mitochondrial complex I deficiency 33. Orth…		6.57244	7.04727	0.528911	6.65674	6.72645	A	G	FALSE	12	93	7.73118	29.9167	0.105457	16	85	10.1529	26.3125	0.0758928	0.34799	4	39	5.20513	25.5	0.0270599	0.246833	0.0382602	-0.120849	-24.8923	-24.7714	-4	28	8	2R	10897181
Polr2E	2R:10898374	CDS	TG	S	S	0.683657	0.713519	0	Silent	FBgn0033571	-1	No	RNA_pol_subH/Rpb5_C	Predicted to enable DNA binding activity. Predicted to contribute to RNA polymerase I activity; RNA polymerase II activity; and RNA polymerase III activity. Predicted to be involved in tRNA transcription by RNA polymerase III; transcription by RNA polymerase I; and transcription by RNA polymerase II. Predicted to be part of RNA polymerase I complex; RNA polymerase II, core complex; and RNA polyme…	SETAGRYISY	2.04709	2.59137	0.380904	1.72183	1.91473	A	C	FALSE	11	94	8.70213	31.1818	0.0895634	11	90	11.2111	48.3636	0.0678657	0.793162	0	43	3.06977	0	0	0	0	-0.0298612	0.683657	0.713519	0	22	11	2R	10898374
Polr2E	2R:10898437	CDS	CT	G	G	0.690782	0.624894	0	Silent	FBgn0033571	-1	No	RNA_pol_subH/Rpb5_C	Predicted to enable DNA binding activity. Predicted to contribute to RNA polymerase I activity; RNA polymerase II activity; and RNA polymerase III activity. Predicted to be involved in tRNA transcription by RNA polymerase III; transcription by RNA polymerase I; and transcription by RNA polymerase II. Predicted to be part of RNA polymerase I complex; RNA polymerase II, core complex; and RNA polyme…	GDPVARYFGL	2.04709	2.59137	0.380904	1.72183	1.91473	G	A	FALSE	10	95	7.45263	26.6	0.08748	14	87	9.81609	38.6429	0.0713101	0.562863	0	43	2.5814	0	0	0	0	0.0658882	0.690782	0.624894	-4	24	10	2R	10898437
luna	2R:11106636	FivePrimeUTR	CT	-	-	0.58378	0.570461	0.454854	-	FBgn0040765	-1	No	-	Probable transcription factor that is required for cell differentiation (PubMed:14527717, PubMed:24915236). Essential for proper separation of the sister chromatids during early nuclear division cycles in the syncytial pre-blastoderm embryo (PubMed:24915236). (UniProtKB:Q8MR37)		2.56231	1.58477	0.00374606	1.19796	1.18173	G	A	FALSE	15	90	28.9556	139.6	0.0620685	7	94	27.9043	26.5714	0.14198	0.920452	8	35	21.6	21.125	0.0454888	0.175162	0.426494	0.0133193	-20.5412	-20.5545	8	22	7	2R	11106636
luna	2R:11106661	FivePrimeUTR	TA	-	-	0.573537	0.418921	0.486643	-	FBgn0040765	-1	No	-	Probable transcription factor that is required for cell differentiation (PubMed:14527717, PubMed:24915236). Essential for proper separation of the sister chromatids during early nuclear division cycles in the syncytial pre-blastoderm embryo (PubMed:24915236). (UniProtKB:Q8MR37)		2.56231	1.58477	0.00374606	1.19796	1.18173	A	T	FALSE	12	93	28.0645	133.333	0.0727643	4	97	24.0619	21.25	0.138443	0.316116	5	38	19.6842	23.4	0.0833907	0.500322	0.67344	0.154616	-22.8265	-22.9811	8	16	7	2R	11106661
metro	2R:11227317	CDS	TC	A	A	0.700103	0.84423	0.384615	Silent	FBgn0050021	-1	No	GK/Ca_channel_bsu	menage a trois (metro) encodes controls the expansion of larval neuromuscular junctions (NMJs) and the proper establishment of synaptic boutons. At NMJs Metro associates with the adaptor protein encoded by veli to stabilize the product of dlg1 in a trimeric scaffold complex that limits the size of active zones and glutamate receptor fields.	AQLKPFLIHV	3.99733	2.85182	0.459297	1.44152	1.38535	A	G	FALSE	14	91	31.6154	69.2143	0.080848	11	90	24.0556	59.8182	0.0704772	0.205789	1	42	32.3571	13	0	0.332056	0.0891437	-0.144128	-12.2999	-12.1558	3	25	13	2R	11227317
TpnC47D	2R:11274635	CDS	CG	L	M	0.227273	0	0.223665	Missense	FBgn0010423	-1	No	EF_hand_dom	Predicted to enable calcium ion binding activity and enzyme regulator activity. Is expressed in adult head; adult heart; and organism.	LDIMIEEIDS	4.33191	4.62442	0.748454	7.82426	8.77231	G	C	FALSE	1	104	141.865	22	0	0	101	159.554	0	0	0	21	22	839.5	112.571	0.0199106	0.969571	0	0.227273	-112.344	-112.571	1	1	-20	2R	11274635
TpnC47D	2R:11274764	CDS	TG	D	E	0	0	0.196548	Missense	FBgn0010423	-1	No	-	Predicted to enable calcium ion binding activity and enzyme regulator activity. Is expressed in adult head; adult heart; and organism.	DEAMQKELRE	4.33191	4.62442	0.748454	7.82426	8.77231	A	C	FALSE	0	105	217.61	0	0	0	101	243.832	0	0	0	15	28	1234.79	158.333	0.0223502	0	0	0	-158.333	-158.333	0	0	-15	2R	11274764
S2P	2R:11843471	CDS	GA	V	V	0.398544	0.405028	0	Silent	FBgn0033656	-1	No	Peptidase_M50	Predicted to enable metalloendopeptidase activity. Predicted to be involved in membrane protein intracellular domain proteolysis; regulation of DNA-templated transcription; and regulation of response to endoplasmic reticulum stress. Predicted to be located in membrane. Predicted to be active in cytoplasm. Is expressed in adult head. Human ortholog(s) of this gene implicated in X-linked keratosis …	VLCLVVHEMG	3.72282	3.20532	0.413677	1.64153	1.57763	C	T	FALSE	11	94	50.4787	25.1818	0.0932143	12	89	52.9213	24.1667	0.0911501	0.96084	0	43	38.3953	0	0	0	0	-0.00648429	0.398544	0.405028	-1	23	11	2R	11843471
S2P	2R:11843475	CDS	TA	L	H	0.394896	0.419401	0	Missense	FBgn0033656	-1	No	Peptidase_M50	Predicted to enable metalloendopeptidase activity. Predicted to be involved in membrane protein intracellular domain proteolysis; regulation of DNA-templated transcription; and regulation of response to endoplasmic reticulum stress. Predicted to be located in membrane. Predicted to be active in cytoplasm. Is expressed in adult head. Human ortholog(s) of this gene implicated in X-linked keratosis …	LVLCLVVHEM	3.72282	3.20532	0.413677	1.64153	1.57763	A	T	FALSE	11	94	50.9362	25.4545	0.093735	13	88	53.1591	25.5385	0.0839611	0.84704	0	43	38.5349	0	0	0	0	-0.0245051	0.394896	0.419401	-2	24	11	2R	11843475
PI31	2R:11967614	CDS	CT	P	P	0.808568	0.671392	0.434935	Silent	FBgn0033669	-1	No	-	Plays an important role in the control of proteasome function. Inhibits the hydrolysis of protein and peptide substrates by the 20S proteasome. Enhances 26S proteasome function by promoting its assembly through the interaction with the assembly chaperones PSMD9 and PMSD5. Functions together with ntc to control non-apoptotic caspase activation during sperm individualization. In testis, is required…	PLNPNRPGQG	4.23446	5.38382	0.314522	3.64262	3.07008	G	A	FALSE	13	92	39.6522	42	0.0811927	22	79	43.2785	53.1364	0.0689104	0.218334	4	39	14.0256	18.5	0.0706055	0.0283387	0.168584	0.137176	-17.6914	-17.8286	-9	35	9	2R	11967614
PI31	2R:11967911	CDS	GA	T	T	0.859492	0.72808	0.561905	Silent	FBgn0033669	-1	No	-	Plays an important role in the control of proteasome function. Inhibits the hydrolysis of protein and peptide substrates by the 20S proteasome. Enhances 26S proteasome function by promoting its assembly through the interaction with the assembly chaperones PSMD9 and PMSD5. Functions together with ntc to control non-apoptotic caspase activation during sperm individualization. In testis, is required…	TQTTNSPRPI	4.23446	5.38382	0.314522	3.64262	3.07008	C	T	FALSE	15	90	37.3333	38.0667	0.0685438	22	79	39.557	63.0909	0.0655499	0.186686	4	39	11.641	16.5	0.105391	0.055009	0.313731	0.131412	-15.6405	-15.7719	-7	37	11	2R	11967911
otk2	2R:12023232	ThreePrimeUTR	TC	-	-	0.689107	0.827297	0	-	FBgn0267728	-1	No	-	off-track2 (otk2) encodes a single-pass transmembrane protein with extracellular Ig-like repeats that functions as a coreceptor for the product of Wnt2.		2.31745	2.44148	0.559353	0.202437	0.238081	A	G	FALSE	8	97	28.0619	48.625	0.113022	11	90	29.9667	32.6364	0.0764404	0.30743	0	43	7.39535	0	0	0	0	-0.13819	0.689107	0.827297	-3	19	8	2R	12023232
otk2	2R:12023389	ThreePrimeUTR	CT	-	-	0.691825	0.83101	0	-	FBgn0267728	-1	No	-	off-track2 (otk2) encodes a single-pass transmembrane protein with extracellular Ig-like repeats that functions as a coreceptor for the product of Wnt2.		2.31745	2.44148	0.559353	0.202437	0.238081	G	A	FALSE	7	98	28.6531	62.7143	0.127241	11	90	30.4556	42.7273	0.0886069	0.367792	0	43	7.27907	0	0	0	0	-0.139186	0.691825	0.83101	-4	18	7	2R	12023389
otk2	2R:12023400	ThreePrimeUTR	AC	-	-	0.693733	0.853374	0	-	FBgn0267728	-1	No	-	off-track2 (otk2) encodes a single-pass transmembrane protein with extracellular Ig-like repeats that functions as a coreceptor for the product of Wnt2.		2.31745	2.44148	0.559353	0.202437	0.238081	T	G	FALSE	7	98	29.4898	73	0.12726	13	88	30.4318	46.9231	0.0733666	0.256526	0	43	7.34884	0	0	0	0	-0.159641	0.693733	0.853374	-6	20	7	2R	12023400
otk2	2R:12023406	ThreePrimeUTR	TC	-	-	0.686236	0.838808	0	-	FBgn0267728	-1	No	-	off-track2 (otk2) encodes a single-pass transmembrane protein with extracellular Ig-like repeats that functions as a coreceptor for the product of Wnt2.		2.31745	2.44148	0.559353	0.202437	0.238081	A	G	FALSE	7	98	29.898	75.7143	0.129137	12	89	30.8989	51.9167	0.0797285	0.301313	0	43	7.32558	0	0	0	0	-0.152572	0.686236	0.838808	-5	19	7	2R	12023406
otk2	2R:12025180	FivePrimeUTR	CA	-	-	0.6968	0.706979	0	-	FBgn0267728	-1	No	-	off-track2 (otk2) encodes a single-pass transmembrane protein with extracellular Ig-like repeats that functions as a coreceptor for the product of Wnt2.		2.31745	2.44148	0.559353	0.202437	0.238081	G	T	FALSE	11	94	27.6383	55.9091	0.0950727	9	92	30.1957	69.6667	0.0965925	0.941477	0	43	7.23256	0	0	0	0	-0.0101798	0.6968	0.706979	2	20	11	2R	12025180
Drep3	2R:12061699	CDS	TC	P	P	0.779426	0.54625	0	Silent	FBgn0028407	1	No	CIDE-N_dom	DNA fragmentation factor-related protein 3 (Drep3) encodes a CIDE domain containing protein that can interact with the proteins encoded by Drep2 and Drep4 via CIDE-CIDE interaction.	PGEQWRDPSD	3.12174	3.72334	0.5785	0.173035	0.00806535	T	C	FALSE	7	98	102.602	31.7143	0.104731	18	83	129.518	58.6667	0.0698648	0.0856688	0	43	21.6512	0	0	0	0	0.233177	0.779426	0.54625	-11	25	7	2R	12061699
CG8888	2R:12064749	ThreePrimeUTR	GA	-	-	0.699572	0.621413	0.478885	-	FBgn0033679	-1	No	-	Predicted to enable estradiol 17-beta-dehydrogenase [NAD(P)] activity and testosterone dehydrogenase (NAD+) activity. Predicted to be involved in steroid metabolic process. Located in plasma membrane. Is expressed in adult head; adult heart; corpus allatum primordium; embryonic/larval corpus allatum; and embryonic/larval muscle system. Human ortholog(s) of this gene implicated in autosomal recess…		2.80847	2.95601	0.917446	7.74478	7.48999	C	T	FALSE	11	94	134.138	118.364	0.0877936	10	91	162.615	87.6	0.0783138	0.517788	8	35	410.429	253.125	0.0210324	0.0513269	0.133072	0.0781582	-252.425	-252.504	1	21	3	2R	12064749
jeb	2R:12117129	CDS	CA	T	N	0.787455	0.718312	0	Missense	FBgn0086677	-1	No	-	jelly belly (jeb) encodes a secreted, low-density lipoprotein (LDL) repeat containing protein that functions as signalling ligand for the product of Alk. Binding of the ligand to its receptor activates intracellular Ras/ERK and PI3K signalling pathways. The roles of the product of jeb include embryonic visceral muscle development, growth and organ size regulation, retinal axon targeting, modulati…	TGKIHNPGNY	4.87341	5.32214	0.385496	0.119355	0.0661321	G	T	FALSE	12	93	89.0645	31.75	0.0920142	12	89	110.438	27.6667	0.0820135	0.580496	0	43	21.5814	0	0	0	0	0.069143	0.787455	0.718312	0	24	12	2R	12117129
jeb	2R:12118474	FivePrimeUTR	GT	-	-	0.50336	0.54226	0	-	FBgn0086677	-1	No	-	jelly belly (jeb) encodes a secreted, low-density lipoprotein (LDL) repeat containing protein that functions as signalling ligand for the product of Alk. Binding of the ligand to its receptor activates intracellular Ras/ERK and PI3K signalling pathways. The roles of the product of jeb include embryonic visceral muscle development, growth and organ size regulation, retinal axon targeting, modulati…		4.87341	5.32214	0.385496	0.119355	0.0661321	C	A	FALSE	15	90	106.656	35.5333	0.0523623	14	87	132.517	33.7143	0.0514324	0.601122	0	43	21.6279	0	0	0	0	-0.0389003	0.50336	0.54226	1	29	15	2R	12118474
jeb	2R:12118534	FivePrimeUTR	AT	-	-	0.49776	0.5057	0	-	FBgn0086677	-1	No	-	jelly belly (jeb) encodes a secreted, low-density lipoprotein (LDL) repeat containing protein that functions as signalling ligand for the product of Alk. Binding of the ligand to its receptor activates intracellular Ras/ERK and PI3K signalling pathways. The roles of the product of jeb include embryonic visceral muscle development, growth and organ size regulation, retinal axon targeting, modulati…		4.87341	5.32214	0.385496	0.119355	0.0661321	T	A	FALSE	22	83	193.434	162.364	0.0481487	29	72	248.722	155.517	0.0358564	0.893031	0	43	21.6512	0	0	0	0	-0.00793988	0.49776	0.5057	-7	51	22	2R	12118534
jeb	2R:12118535	FivePrimeUTR	TA	-	-	0.496087	0.506864	0	-	FBgn0086677	-1	No	-	jelly belly (jeb) encodes a secreted, low-density lipoprotein (LDL) repeat containing protein that functions as signalling ligand for the product of Alk. Binding of the ligand to its receptor activates intracellular Ras/ERK and PI3K signalling pathways. The roles of the product of jeb include embryonic visceral muscle development, growth and organ size regulation, retinal axon targeting, modulati…		4.87341	5.32214	0.385496	0.119355	0.0661321	A	T	FALSE	22	83	193.301	162.545	0.0482147	29	72	248.514	156.345	0.0354639	0.854511	0	43	21.6512	0	0	0	0	-0.0107771	0.496087	0.506864	-7	51	22	2R	12118535
jeb	2R:12118732	FivePrimeUTR	CT	-	-	0.503001	0.505323	0	-	FBgn0086677	-1	No	-	jelly belly (jeb) encodes a secreted, low-density lipoprotein (LDL) repeat containing protein that functions as signalling ligand for the product of Alk. Binding of the ligand to its receptor activates intracellular Ras/ERK and PI3K signalling pathways. The roles of the product of jeb include embryonic visceral muscle development, growth and organ size regulation, retinal axon targeting, modulati…		4.87341	5.32214	0.385496	0.119355	0.0661321	G	A	FALSE	23	82	224.659	188.174	0.044568	31	70	299.871	200.742	0.0397907	0.969316	0	43	21.7442	0	0	0	0	-0.0023218	0.503001	0.505323	-8	54	23	2R	12118732
Prp8	2R:12162508	CDS	TG	G	G	0.711732	0.516459	0.307692	Silent	FBgn0033688	-1	No	-	pre-mRNA processing factor 8 (Prp8) is an essential gene that encodes the largest and most highly conserved splicing factor. It is a core component of the U5 snRNP, with a key function in pre-mRNA processing catalyzed by the spliceosome.	GIPIPVGGQG	2.25265	2.28292	0.753948	0.79197	1.00345	A	C	FALSE	13	92	89.1196	35.1538	0.096696	16	85	111.412	50.875	0.0763924	0.119673	1	42	20.4762	39	0	0.285968	0.517511	0.195273	-38.2883	-38.4835	-3	29	12	2R	12162508
Oda	2R:12166767	ThreePrimeUTR	GA	-	-	0.34948	0.252214	0.138717	-	FBgn0014184	-1	No	-	Ornithine decarboxylase (ODC) antizyme protein that negatively regulates ODC activity and intracellular polyamine biosynthesis and uptake in response to increased intracellular polyamine levels. Binds to ODC monomers, inhibiting the assembly of the functional ODC homodimer, and targets the monomers for ubiquitin-independent proteolytic destruction by the 26S proteasome (By similarity). Required f…		9.15983	8.84911	0.10518	9.45199	9.25043	C	T	FALSE	34	71	194.099	143	0.0392193	38	63	188.27	132.184	0.0250139	0.0362095	16	27	138.852	139.812	0.0128028	0.000696574	0.00600939	0.097266	-139.463	-139.56	-4	72	18	2R	12166767
Oda	2R:12167169	ThreePrimeUTR	GA	-	-	0.545167	0.473724	0.439554	-	FBgn0014184	-1	No	-	Ornithine decarboxylase (ODC) antizyme protein that negatively regulates ODC activity and intracellular polyamine biosynthesis and uptake in response to increased intracellular polyamine levels. Binds to ODC monomers, inhibiting the assembly of the functional ODC homodimer, and targets the monomers for ubiquitin-independent proteolytic destruction by the 26S proteasome (By similarity). Required f…		9.15983	8.84911	0.10518	9.45199	9.25043	C	T	FALSE	26	79	287.025	233.077	0.0364568	36	65	259.046	167.611	0.0320024	0.148155	8	35	303.8	264.375	0.0112406	0.123174	0.621521	0.0714436	-263.83	-263.901	-10	62	18	2R	12167169
RpS11	2R:12200182	CDS	TC	G	G	0.495834	0.485403	0.480046	Silent	FBgn0033699	-1	No	Ribosomal_uS17_N	A structural constituent of ribosome. Predicted to be involved in cytoplasmic translation. Located in cytosolic ribosome and nucleolus. Colocalizes with nuclear chromosome. Is expressed in adult head; adult heart; and organism. Orthologous to human RPS11 (ribosomal protein S11).	GITKKKLLRR	11.6992	11.5734	0.0283431	11.6744	11.5512	A	G	FALSE	30	75	1706.52	714.467	0.0213269	39	62	1313.19	708.359	0.0147405	0.679474	8	35	2034.17	657.875	0.00727298	0.708363	0.871702	0.0104306	-657.379	-657.39	-9	69	22	2R	12200182
Cam	2R:12274565	ThreePrimeUTR	GA	-	-	0.195136	0.256018	0	-	FBgn0000253	1	No	-	Calmodulin (Cam) encodes a Calcium-binding messenger protein. It acts as a part of the calcium signal transduction pathway and interacts with various target proteins such as kinases or phosphatases. It is involved in actin filament-based movement, mitotic spinde assembly, axon guidance, DNA damage response, autophagy, cell death, sensory perception, and muscle homeostasis.		10.569	11.0332	0.00482234	7.2373	7.1308	G	A	FALSE	14	91	221.769	132.786	0.0321091	8	93	277.892	153.125	0.082584	0.425226	0	43	23.3023	0	0	0	0	-0.0608821	0.195136	0.256018	6	22	14	2R	12274565
Galphaq	2R:12613775	FivePrimeUTR	AT	-	-	0.585444	0.73038	0	-	FBgn0004435	1	No	-	G protein alpha q subunit (Galphaq) encodes an alpha subunit of a heterotrimeric G-protein that functions downstream of GPCR signaling. It contributes to neuronal development, olfaction, flight, learning and memory.		4.30852	4.11752	0.995742	1.74037	1.60284	A	T	FALSE	15	90	67.3111	104.333	0.0742089	27	74	30.7568	50.2963	0.0564999	0.130388	0	43	8.16279	0	0	0	0	-0.144936	0.585444	0.73038	-12	42	15	2R	12613775
CG45086	2R:12613775	ThreePrimeUTR	AT	-	-	0.585444	0.73038	0	-	FBgn0266487	1	No	-	This gene is referred to in FlyBase by the symbol Dmel\CG45086 (FBgn0266487). It is a protein_coding_gene from Dmel. It has 2 annotated transcripts and 2 polypeptides (1 unique). Gene sequence location is 2R:12612740..12619820. Its molecular function is described by: . It is involved in the biological process described with: . No alleles are reported.		2.91734	2.17882	0.199811	0.882148	0.781453	A	T	FALSE	15	90	67.3111	104.333	0.0742089	27	74	30.7568	50.2963	0.0564999	0.130388	0	43	8.16279	0	0	0	0	-0.144936	0.585444	0.73038	-12	42	15	2R	12613775
Galphaq	2R:12613986	FivePrimeUTR	CT	-	-	0.527111	0.698813	0	-	FBgn0004435	1	No	-	G protein alpha q subunit (Galphaq) encodes an alpha subunit of a heterotrimeric G-protein that functions downstream of GPCR signaling. It contributes to neuronal development, olfaction, flight, learning and memory.		4.30852	4.11752	0.995742	1.74037	1.60284	C	T	FALSE	12	93	35.957	50.1667	0.0793193	11	90	16.5444	28.0909	0.0815238	0.14634	0	43	4.53488	0	0	0	0	-0.171702	0.527111	0.698813	1	23	12	2R	12613986
CG45086	2R:12613986	ThreePrimeUTR	CT	-	-	0.527111	0.698813	0	-	FBgn0266487	1	No	-	This gene is referred to in FlyBase by the symbol Dmel\CG45086 (FBgn0266487). It is a protein_coding_gene from Dmel. It has 2 annotated transcripts and 2 polypeptides (1 unique). Gene sequence location is 2R:12612740..12619820. Its molecular function is described by: . It is involved in the biological process described with: . No alleles are reported.		2.91734	2.17882	0.199811	0.882148	0.781453	C	T	FALSE	12	93	35.957	50.1667	0.0793193	11	90	16.5444	28.0909	0.0815238	0.14634	0	43	4.53488	0	0	0	0	-0.171702	0.527111	0.698813	1	23	12	2R	12613986
Iswi	2R:12640241	CDS	GA	S	S	0.958048	0.796543	0	Silent	FBgn0011604	1	No	-	Energy-transducing component of the chromatin-remodeling complexes NURF (nucleosome-remodeling factor), ACF (ATP-utilizing chromatin assembly and remodeling factor), and CHRAC (chromatin accessibility complex) (PubMed:10856248, PubMed:11447119). NURF catalyzes ATP-dependent nucleosome sliding and facilitates transcription of chromatin. It is required for homeotic gene expression, proper larval bl…	SNTPAPAPQP	1.73776	1.85279	0.924477	0.437872	0.449027	G	A	FALSE	4	101	15.0297	57.75	0.0243441	14	87	15.6552	36.6429	0.0652068	0.215587	0	43	5.11628	0	0	0	0	0.161505	0.958048	0.796543	-10	18	4	2R	12640241
Iswi	2R:12640302	CDS	GA	A	T	0.944444	0.824464	0	Missense	FBgn0011604	1	No	-	Energy-transducing component of the chromatin-remodeling complexes NURF (nucleosome-remodeling factor), ACF (ATP-utilizing chromatin assembly and remodeling factor), and CHRAC (chromatin accessibility complex) (PubMed:10856248, PubMed:11447119). NURF catalyzes ATP-dependent nucleosome sliding and facilitates transcription of chromatin. It is required for homeotic gene expression, proper larval bl…	ATSSNSKKKK	1.73776	1.85279	0.924477	0.437872	0.449027	G	A	FALSE	3	102	14.1569	47	0.032075	13	88	14.5	36.1538	0.0654985	0.408111	0	43	4.86047	0	0	0	0	0.11998	0.944444	0.824464	-10	16	3	2R	12640302
Iswi	2R:12640397	ThreePrimeUTR	TA	-	-	0.788176	0.83156	0	-	FBgn0011604	1	No	-	Energy-transducing component of the chromatin-remodeling complexes NURF (nucleosome-remodeling factor), ACF (ATP-utilizing chromatin assembly and remodeling factor), and CHRAC (chromatin accessibility complex) (PubMed:10856248, PubMed:11447119). NURF catalyzes ATP-dependent nucleosome sliding and facilitates transcription of chromatin. It is required for homeotic gene expression, proper larval bl…		1.73776	1.85279	0.924477	0.437872	0.449027	T	A	FALSE	5	100	16.09	35.8	0.136138	15	86	14.9186	30.6	0.0528361	0.719829	0	43	5.16279	0	0	0	0	-0.0433836	0.788176	0.83156	-10	20	5	2R	12640397
nemy	2R:12660077	ThreePrimeUTR	CT	-	-	0.713478	0.797503	0	-	FBgn0261673	-1	No	-	no extended memory (nemy) likely encodes a human cytochrome b561 homolog and is involved in middle-term olfactory associative memory and courtship conditioning memory.		2.14477	1.22614	0.010529	1.66041	1.71026	G	A	FALSE	12	93	25.5699	47.3333	0.0652513	9	92	8.95652	56.5556	0.0857198	0.436333	0	43	5.93023	0	0	0	0	-0.0840252	0.713478	0.797503	3	21	12	2R	12660077
nemy	2R:12660178	ThreePrimeUTR	GA	-	-	0.751108	0.707297	0	-	FBgn0261673	-1	No	-	no extended memory (nemy) likely encodes a human cytochrome b561 homolog and is involved in middle-term olfactory associative memory and courtship conditioning memory.		2.14477	1.22614	0.010529	1.66041	1.71026	C	T	FALSE	12	93	24.7634	45	0.0664787	7	94	9.10638	68	0.104676	0.714632	0	43	5.39535	0	0	0	0	0.0438114	0.751108	0.707297	5	19	12	2R	12660178
GLS	2R:12670676	ThreePrimeUTR	TC	-	-	0.701709	0.866488	0	-	FBgn0261625	-1	No	-	Predicted to enable glutaminase activity. Predicted to be involved in glutamate biosynthetic process and glutamine catabolic process. Predicted to be located in mitochondrion. Is expressed in several structures, including embryonic/larval central nervous system; presumptive embryonic/larval nervous system; spermatozoon; ventral midline of embryo; and ventral nerve cord primordium. Human ortholog(…		3.11216	3.49617	0.657215	0.866847	1.01098	A	G	FALSE	6	99	13.1515	31.3333	0.147756	15	86	16.7907	38.6667	0.0644743	0.24378	0	43	4.55814	0	0	0	0	-0.164779	0.701709	0.866488	-9	21	6	2R	12670676
CG8768	2R:12691813	CDS	CT	T	T	0.968182	0.931034	0.214286	Silent	FBgn0033769	-1	No	-	Is expressed in adult head; adult heart; and wing disc. Orthologous to human SDR39U1 (short chain dehydrogenase/reductase family 39U member 1).	TSNLEFSKAF	1.83628	0.988824	0.381733	1.8475	1.65599	G	A	FALSE	11	94	13.383	56.2727	0.0318182	7	94	12.7128	22.1429	0.0689655	0.589265	1	42	6.90476	14	0	4.51434e-05	0.0103993	0.0371473	-13.0318	-13.069	4	18	10	2R	12691813
CG8768	2R:12691822	CDS	AC	P	P	0.961722	0.81717	0.2	Silent	FBgn0033769	-1	No	-	Is expressed in adult head; adult heart; and wing disc. Orthologous to human SDR39U1 (short chain dehydrogenase/reductase family 39U member 1).	PEITSNLEFS	1.83628	0.988824	0.381733	1.8475	1.65599	T	G	FALSE	11	94	13.3191	54	0.0382775	8	93	12.6022	21.625	0.115573	0.196226	1	42	6.85714	15	0	0.000186532	0.118289	0.144552	-14.0383	-14.1828	3	19	10	2R	12691822
CG8768	2R:12691993	CDS	TC	G	G	0.934577	0.856852	0	Silent	FBgn0033769	-1	No	Epimerase_deHydtase	Is expressed in adult head; adult heart; and wing disc. Orthologous to human SDR39U1 (short chain dehydrogenase/reductase family 39U member 1).	GHGGGMVQSM	1.83628	0.988824	0.381733	1.8475	1.65599	A	G	FALSE	11	94	12.7766	53.7273	0.0448254	8	93	12.957	42.625	0.0984438	0.440873	0	43	6.83721	0	0	0	0	0.0777248	0.934577	0.856852	3	19	11	2R	12691993
bic	2R:12871090	ThreePrimeUTR	GA	-	-	0.159027	0.132022	0	-	FBgn0000181	1	No	-	bicaudal (bic) encodes the beta subunit of the nascent polypeptide-associated complex. It regulates osk mRNA localization, which in turn specifies the anterior/posterior axis of the egg.		9.28777	9.19752	0.669688	8.05148	8.07332	G	A	FALSE	17	88	380.182	305.471	0.0153214	9	92	359.522	336	0.0130668	0.25626	0	43	214.163	0	0	0	0	0.0270045	0.159027	0.132022	8	26	17	2R	12871090
CG3955	2R:13128051	ThreePrimeUTR	CT	-	-	0.750672	0.684781	0	-	FBgn0033793	-1	No	-	Is expressed in embryonic brain and larval ventral nerve cord.		4.54626	4.75042	0.982538	0.118374	0.14535	G	A	FALSE	23	82	23.878	41.7826	0.0519167	29	72	23.4167	43.4828	0.0466932	0.350442	0	43	5.23256	0	0	0	0	0.0658906	0.750672	0.684781	-6	52	23	2R	13128051
CG3955	2R:13128089	ThreePrimeUTR	TG	-	-	0.709742	0.692386	0	-	FBgn0033793	-1	No	-	Is expressed in embryonic brain and larval ventral nerve cord.		4.54626	4.75042	0.982538	0.118374	0.14535	A	C	FALSE	24	81	36.5926	62.3333	0.056449	35	66	31.197	66.8857	0.0492672	0.819423	0	43	5.27907	0	0	0	0	0.0173556	0.709742	0.692386	-11	59	24	2R	13128089
CG3955	2R:13128191	ThreePrimeUTR	GT	-	-	0.705379	0.698068	0	-	FBgn0033793	-1	No	-	Is expressed in embryonic brain and larval ventral nerve cord.		4.54626	4.75042	0.982538	0.118374	0.14535	C	A	FALSE	27	78	42.6538	64.2222	0.0528589	34	67	31.8806	75.1471	0.0503355	0.921162	0	43	5.25581	0	0	0	0	0.00731126	0.705379	0.698068	-7	61	27	2R	13128191
CG3955	2R:13128207	CDS	CG	L	M	0.730437	0.721852	0	Missense	FBgn0033793	-1	No	-	Is expressed in embryonic brain and larval ventral nerve cord.	LLKLQ*	4.54626	4.75042	0.982538	0.118374	0.14535	G	C	FALSE	26	79	38.1646	55.5	0.0515219	33	68	29.2941	67.303	0.0489759	0.905086	0	43	5.23256	0	0	0	0	0.00858456	0.730437	0.721852	-7	59	26	2R	13128207
CG3955	2R:13128738	CDS	CT	S	S	0.683845	0.725248	0	Silent	FBgn0033793	-1	No	-	Is expressed in embryonic brain and larval ventral nerve cord.	SGHIHRTAAA	4.54626	4.75042	0.982538	0.118374	0.14535	G	A	FALSE	27	78	39.2179	63.2963	0.0602303	32	69	24.1449	79.4688	0.0516805	0.601786	0	43	5.23256	0	0	0	0	-0.041403	0.683845	0.725248	-5	59	27	2R	13128738
CG3955	2R:13128744	CDS	GT	M	L	0.686425	0.707787	0	Missense	FBgn0033793	-1	No	-	Is expressed in embryonic brain and larval ventral nerve cord.	MTSGHIHRTA	4.54626	4.75042	0.982538	0.118374	0.14535	C	A	FALSE	27	78	39.5	67.963	0.059947	33	68	22.8235	86.3636	0.0533821	0.790754	0	43	5.23256	0	0	0	0	-0.0213627	0.686425	0.707787	-6	60	27	2R	13128744
Spt-I	2R:13170648	ThreePrimeUTR	GC	-	-	0.677405	0.696511	0	-	FBgn0086532	1	No	-	Predicted to enable serine C-palmitoyltransferase activity. Involved in positive regulation of sphingolipid biosynthetic process. Predicted to be part of serine C-palmitoyltransferase complex. Predicted to be active in endoplasmic reticulum. Is expressed in several structures, including adult head; central brain primordium; embryonic/larval midgut; and presumptive embryonic/larval system. Used to…		4.82191	3.9845	0.637321	1.531	1.33626	G	C	FALSE	19	105	32.5619	45.3684	0.0589118	4	101	23.9109	23.75	0.0835241	0.889063	0	43	8.04651	0	0	0	0	-0.0191063	0.677405	0.696511	15	23	19	2R	13170648
CG4646	2R:13219521	ThreePrimeUTR	TC	-	-	0.803207	0.691701	0	-	FBgn0033810	-1	No	-	Predicted to enable zinc ion binding activity. Orthologous to human CZIB (CXXC motif containing zinc binding protein).		2.56664	3.04089	0.50234	3.24437	2.76824	A	G	FALSE	13	92	7.58696	22.4615	0.0748773	13	88	7.59091	21.3077	0.10671	0.400805	0	43	8.93023	0	0	0	0	0.111506	0.803207	0.691701	0	26	13	2R	13219521
CG4646	2R:13219731	CDS	AT	D	V	0.76739	0.869296	0.676113	Missense	FBgn0033810	-1	No	CXXC_Zn-binding_euk	Predicted to enable zinc ion binding activity. Orthologous to human CZIB (CXXC motif containing zinc binding protein).	DDWVEYDQKN	2.56664	3.04089	0.50234	3.24437	2.76824	T	A	FALSE	24	81	9.93827	42.0417	0.0632072	31	70	9.6	38.8065	0.0417439	0.16883	2	41	9.58537	16	0.0607287	0.686566	0.256716	-0.101907	-15.2326	-15.1307	-7	55	22	2R	13219731
CG4646	2R:13220050	CDS	CT	S	S	0.783432	0.89204	0.539394	Silent	FBgn0033810	-1	No	CXXC_Zn-binding_euk	Predicted to enable zinc ion binding activity. Orthologous to human CZIB (CXXC motif containing zinc binding protein).	SERVQQDSRN	2.56664	3.04089	0.50234	3.24437	2.76824	G	A	FALSE	23	82	9.57317	42	0.0648848	26	75	9.57333	40.5769	0.0449007	0.1674	2	41	9.5122	13	0.00606061	0.288	0.0418587	-0.108608	-12.2166	-12.108	-3	49	21	2R	13220050
fsd	2R:13231214	CDS	TG	V	V	0.948718	0.974026	0	Silent	FBgn0033813	1	No	-	fates-shifted (fsd) encodes an F-box protein with a role in the gradient formation of the product of bcd and fatemap specification through targeting bcd protein for ubiquitination and degradation.	VSCFQTHYQC	0.97867	1.60087	0.62003	0.956147	1.45624	T	G	FALSE	9	96	5.70833	41.2222	0.0512821	11	90	7.63333	52	0.025974	0.647279	0	43	9.55814	0	0	0	0	-0.025308	0.948718	0.974026	-2	20	9	2R	13231214
Mp20	2R:13247523	ThreePrimeUTR	CT	-	-	0.590646	0.595695	0.506865	-	FBgn0002789	1	No	-	Predicted to enable actin filament binding activity. Involved in myoblast fusion and regulation of myoblast fusion. Located in cytoplasm. Is expressed in several structures, including adult heart; border follicle cell; embryonic/larval muscle system; esophageal visceral muscle; and synchronous muscle cell. Orthologous to human TAGLN (transgelin); TAGLN2 (transgelin 2); and TAGLN3 (transgelin 3).		7.18425	6.72376	0.949291	12.518	12.5339	C	T	FALSE	59	46	52.4783	565.39	0.0258531	49	52	314.904	489.449	0.0335287	0.903825	43	0		1335.47	0.007363	0.00801872	0.0168421	-0.00504932	-1334.87	-1334.87	10	108	16	2R	13247523
bbc	2R:13486963	ThreePrimeUTR	CG	-	-	0.72142	0.932143	0	-	FBgn0033844	-1	No	-	Predicted to enable diacylglycerol cholinephosphotransferase activity and ethanolaminephosphotransferase activity. Predicted to be involved in phosphatidylethanolamine biosynthetic process. Located in endoplasmic reticulum. Is expressed in adult head and adult heart. Used to study retinal disease. Orthologous to several human genes including CHPT1 (choline phosphotransferase 1).		2.43079	2.35712	0.725008	1.06293	1.18129	G	C	FALSE	15	90	7.58889	51.6	0.0850305	15	86	7.86047	36	0.0484821	0.0400936	0	43	1.90698	0	0	0	0	-0.210723	0.72142	0.932143	0	30	15	2R	13486963
bbc	2R:13487350	ThreePrimeUTR	GA	-	-	0.692165	0.942745	0	-	FBgn0033844	-1	No	-	Predicted to enable diacylglycerol cholinephosphotransferase activity and ethanolaminephosphotransferase activity. Predicted to be involved in phosphatidylethanolamine biosynthetic process. Located in endoplasmic reticulum. Is expressed in adult head and adult heart. Used to study retinal disease. Orthologous to several human genes including CHPT1 (choline phosphotransferase 1).		2.43079	2.35712	0.725008	1.06293	1.18129	C	T	FALSE	10	95	7.69474	31.6	0.111249	13	88	8.29545	29.4615	0.052267	0.0391503	0	43	1.37209	0	0	0	0	-0.25058	0.692165	0.942745	-3	23	10	2R	13487350
bbc	2R:13494274	CDS	GA	V	V	0.825955	0.878977	0	Silent	FBgn0033844	-1	No	CDP-OH_P_trans	Predicted to enable diacylglycerol cholinephosphotransferase activity and ethanolaminephosphotransferase activity. Predicted to be involved in phosphatidylethanolamine biosynthetic process. Located in endoplasmic reticulum. Is expressed in adult head and adult heart. Used to study retinal disease. Orthologous to several human genes including CHPT1 (choline phosphotransferase 1).	VVTTLILICY	2.43079	2.35712	0.725008	1.06293	1.18129	C	T	FALSE	12	93	7.73118	27.25	0.0725792	8	93	5.25806	21.75	0.0938208	0.656578	0	43	1.04651	0	0	0	0	-0.0530228	0.825955	0.878977	4	20	12	2R	13494274
bbc	2R:13494301	CDS	TA	I	I	0.854179	0.88798	0	Silent	FBgn0033844	-1	No	CDP-OH_P_trans	Predicted to enable diacylglycerol cholinephosphotransferase activity and ethanolaminephosphotransferase activity. Predicted to be involved in phosphatidylethanolamine biosynthetic process. Located in endoplasmic reticulum. Is expressed in adult head and adult heart. Used to study retinal disease. Orthologous to several human genes including CHPT1 (choline phosphotransferase 1).	ITIVGLILNV	2.43079	2.35712	0.725008	1.06293	1.18129	A	T	FALSE	12	93	7.02151	27.1667	0.0681988	7	94	5.15957	24	0.0810642	0.759861	0	43	1.06977	0	0	0	0	-0.0338011	0.854179	0.88798	5	19	12	2R	13494301
drk	2R:13495937	ThreePrimeUTR	CT	-	-	0.870103	0.737847	0	-	FBgn0004638	-1	No	-	downstream of receptor kinase (drk) encodes an adaptor protein that recognizes phosphorylated tyrosine residues of membrane receptors and triggers the Ras/Raf/MAPK pathway. drk product contributes to the regulation of cytoskeletal organization and participates in developmental and cognitive processes (associative learning, anesthesia resistant memory).		3.72007	4.14339	0.579892	3.18733	2.93599	G	A	FALSE	8	97	8.04124	27.75	0.0747547	17	84	9.85714	24.4118	0.0584625	0.197492	0	43	2.39535	0	0	0	0	0.132256	0.870103	0.737847	-9	25	8	2R	13495937
drk	2R:13496643	ThreePrimeUTR	GA	-	-	0.841868	0.801732	0.454545	-	FBgn0004638	-1	No	-	downstream of receptor kinase (drk) encodes an adaptor protein that recognizes phosphorylated tyrosine residues of membrane receptors and triggers the Ras/Raf/MAPK pathway. drk product contributes to the regulation of cytoskeletal organization and participates in developmental and cognitive processes (associative learning, anesthesia resistant memory).		3.72007	4.14339	0.579892	3.18733	2.93599	C	T	FALSE	19	86	8.13953	28.3684	0.0408537	12	89	11.6742	30.9167	0.0867847	0.642883	1	42	2.95238	11	0	0.0481666	0.290859	0.0401365	-10.1581	-10.1983	7	31	18	2R	13496643
drk	2R:13496649	ThreePrimeUTR	AT	-	-	0.837121	0.802163	0	-	FBgn0004638	-1	No	-	downstream of receptor kinase (drk) encodes an adaptor protein that recognizes phosphorylated tyrosine residues of membrane receptors and triggers the Ras/Raf/MAPK pathway. drk product contributes to the regulation of cytoskeletal organization and participates in developmental and cognitive processes (associative learning, anesthesia resistant memory).		3.72007	4.14339	0.579892	3.18733	2.93599	T	A	FALSE	19	86	8.27907	29.1579	0.041362	12	89	11.573	32.3333	0.0859846	0.685811	0	43	3.11628	0	0	0	0	0.0349585	0.837121	0.802163	7	31	19	2R	13496649
drk	2R:13496888	ThreePrimeUTR	TA	-	-	0.800391	0.676501	0	-	FBgn0004638	-1	No	-	downstream of receptor kinase (drk) encodes an adaptor protein that recognizes phosphorylated tyrosine residues of membrane receptors and triggers the Ras/Raf/MAPK pathway. drk product contributes to the regulation of cytoskeletal organization and participates in developmental and cognitive processes (associative learning, anesthesia resistant memory).		3.72007	4.14339	0.579892	3.18733	2.93599	A	T	FALSE	21	84	8.02381	28.4762	0.0455341	21	80	11.1125	27.4286	0.0635668	0.120972	0	43	4.09302	0	0	0	0	0.12389	0.800391	0.676501	0	42	21	2R	13496888
drk	2R:13496947	ThreePrimeUTR	AC	-	-	0.751208	0.719883	0.593862	-	FBgn0004638	-1	No	-	downstream of receptor kinase (drk) encodes an adaptor protein that recognizes phosphorylated tyrosine residues of membrane receptors and triggers the Ras/Raf/MAPK pathway. drk product contributes to the regulation of cytoskeletal organization and participates in developmental and cognitive processes (associative learning, anesthesia resistant memory).		3.72007	4.14339	0.579892	3.18733	2.93599	T	G	FALSE	36	69	8.56522	34.6389	0.0439215	36	65	14.4769	34.2778	0.0427429	0.610871	9	34	4.88235	14.5556	0.0694093	0.103946	0.180157	0.0313252	-13.8043	-13.8357	0	72	27	2R	13496947
drk	2R:13497407	CDS	GA	R	R	0.750635	0.741152	0.504809	Silent	FBgn0004638	-1	No	-	downstream of receptor kinase (drk) encodes an adaptor protein that recognizes phosphorylated tyrosine residues of membrane receptors and triggers the Ras/Raf/MAPK pathway. drk product contributes to the regulation of cytoskeletal organization and participates in developmental and cognitive processes (associative learning, anesthesia resistant memory).	RSQDVKLRDM	3.72007	4.14339	0.579892	3.18733	2.93599	C	T	FALSE	32	73	7.46575	32.125	0.0437956	35	66	14.0606	33.1714	0.0495594	0.887287	5	38	4.5	12.8	0.0737264	0.0400658	0.0881496	0.0094827	-12.0494	-12.0588	-3	67	27	2R	13497407
mEFTu1	2R:13508697	CDS	CT	G	G	0.755479	0.858101	0.662618	Silent	FBgn0024556	1	No	EFTu-like_2	mitochondrial translation elongation factor Tu 1 (mEFTu1) encodes a protein predicted to function within mitochondria to bring aminoacyl-tRNA to the ribosome during the elongation phase of mRNA translation.	GYNKVLKSTV	3.56478	2.87336	0.235368	1.86029	2.06801	C	T	FALSE	26	105	18.7429	34.4231	0.053881	16	101	17.0594	38.3125	0.0764831	0.266888	3	43	3.2093	14.6667	0.169724	0.585915	0.321924	-0.102621	-13.9112	-13.8086	10	42	23	2R	13508697
mEFTu1	2R:13509042	CDS	CT	L	L	0.724475	0.815449	0.712815	Silent	FBgn0024556	1	No	Transl_elong_EFTu/EF1A_C	mitochondrial translation elongation factor Tu 1 (mEFTu1) encodes a protein predicted to function within mitochondria to bring aminoacyl-tRNA to the ribosome during the elongation phase of mRNA translation.	LIRPMVLEQG	3.56478	2.87336	0.235368	1.86029	2.06801	C	T	FALSE	28	105	21.2667	44.8929	0.0496073	21	101	17.4158	36.1429	0.0648631	0.262392	2	43	3.48837	21	0.234554	0.952539	0.647493	-0.0909739	-20.2755	-20.1846	7	49	26	2R	13509042
mEFTu1	2R:13509299	ThreePrimeUTR	CT	-	-	0.651591	0.801621	0	-	FBgn0024556	1	No	-	mitochondrial translation elongation factor Tu 1 (mEFTu1) encodes a protein predicted to function within mitochondria to bring aminoacyl-tRNA to the ribosome during the elongation phase of mRNA translation.		3.56478	2.87336	0.235368	1.86029	2.06801	C	T	FALSE	20	105	13.7429	29.75	0.0628793	11	101	11.2178	23.7273	0.0844897	0.165402	0	43	2.09302	0	0	0	0	-0.15003	0.651591	0.801621	9	31	20	2R	13509299
Roe1	2R:13555257	CDS	TC	R	R	0.809428	0.832937	0.474359	Silent	FBgn0014877	1	No	GrpE	Essential component of the PAM complex, a complex required for the translocation of transit peptide-containing proteins from the inner membrane into the mitochondrial matrix in an ATP-dependent manner. Seems to control the nucleotide-dependent binding of mitochondrial HSP70 to substrate proteins (By similarity). (UniProtKB:P48604)	RPALVGVSKC	3.29931	2.86987	0.707151	1.50769	1.83494	T	C	FALSE	22	83	15.7711	45.1818	0.0546047	27	74	10.4054	28.5556	0.0492384	0.750555	2	41	1.7561	15.5	0.141026	0.0876504	0.0646257	-0.0235094	-14.6906	-14.6671	-5	49	20	2R	13555257
CG6191	2R:13581018	CDS	CT	H	H	0.85937	0.783761	0.545455	Silent	FBgn0027581	-1	No	-	Predicted to be involved in regulation of cell cycle. Is expressed in adult head; embryonic/larval nervous system; embryonic/larval somatic muscle cell; gonad; and imaginal disc. Orthologous to human CABLES1 (Cdk5 and Abl enzyme substrate 1) and CABLES2 (Cdk5 and Abl enzyme substrate 2).	HYQRLLYES*	1.34038	1.15198	0.36848	1.28762	1.09303	G	A	FALSE	14	91	6.0989	32.5714	0.0672883	7	94	8.02128	21.8571	0.101907	0.533512	1	42	4.78571	11	0	0.249847	0.44	0.0756083	-10.1406	-10.2162	7	21	13	2R	13581018
CG45088	2R:13581018	ThreePrimeUTR	CT	-	-	0.85937	0.783761	0.545455	-	FBgn0266489	-1	No	-	This gene is referred to in FlyBase by the symbol Dmel\CG45088 (FBgn0266489). It is a protein_coding_gene from Dmel. It has one annotated transcript and one polypeptide. Gene sequence location is 2R:13580586..13593339. Its molecular function is described by: . It is involved in the biological process described with: . 3 alleles are reported. No phenotypic data is available. No phenotypic class da…		0.753651	0.477359	0.134484	0.511781	0.359837	G	A	FALSE	14	91	6.0989	32.5714	0.0672883	7	94	8.02128	21.8571	0.101907	0.533512	1	42	4.78571	11	0	0.249847	0.44	0.0756083	-10.1406	-10.2162	7	21	13	2R	13581018
CG6191	2R:13581069	CDS	TG	L	M	0.844268	0.673737	0	Missense	FBgn0027581	-1	No	Cyclin_N	Predicted to be involved in regulation of cell cycle. Is expressed in adult head; embryonic/larval nervous system; embryonic/larval somatic muscle cell; gonad; and imaginal disc. Orthologous to human CABLES1 (Cdk5 and Abl enzyme substrate 1) and CABLES2 (Cdk5 and Abl enzyme substrate 2).	LVALEFSLHV	1.34038	1.15198	0.36848	1.28762	1.09303	A	C	FALSE	13	92	5.47826	30.3077	0.0746682	5	96	7.80208	19.2	0.135929	0.261336	0	43	4.16279	0	0	0	0	0.170531	0.844268	0.673737	8	18	13	2R	13581069
CG45088	2R:13581069	ThreePrimeUTR	TG	-	-	0.844268	0.673737	0	-	FBgn0266489	-1	No	-	This gene is referred to in FlyBase by the symbol Dmel\CG45088 (FBgn0266489). It is a protein_coding_gene from Dmel. It has one annotated transcript and one polypeptide. Gene sequence location is 2R:13580586..13593339. Its molecular function is described by: . It is involved in the biological process described with: . 3 alleles are reported. No phenotypic data is available. No phenotypic class da…		0.753651	0.477359	0.134484	0.511781	0.359837	A	C	FALSE	13	92	5.47826	30.3077	0.0746682	5	96	7.80208	19.2	0.135929	0.261336	0	43	4.16279	0	0	0	0	0.170531	0.844268	0.673737	8	18	13	2R	13581069
CG6191	2R:13581168	CDS	TC	N	N	0.836078	0.759463	0	Silent	FBgn0027581	-1	No	Cyclin_N	Predicted to be involved in regulation of cell cycle. Is expressed in adult head; embryonic/larval nervous system; embryonic/larval somatic muscle cell; gonad; and imaginal disc. Orthologous to human CABLES1 (Cdk5 and Abl enzyme substrate 1) and CABLES2 (Cdk5 and Abl enzyme substrate 2).	NDVKGDALKS	1.34038	1.15198	0.36848	1.28762	1.09303	A	G	FALSE	13	92	4.43478	31.2308	0.0787824	4	97	7.3299	18.75	0.157285	0.651133	0	43	4.27907	0	0	0	0	0.0766154	0.836078	0.759463	9	17	13	2R	13581168
CG45088	2R:13581168	ThreePrimeUTR	TC	-	-	0.836078	0.759463	0	-	FBgn0266489	-1	No	-	This gene is referred to in FlyBase by the symbol Dmel\CG45088 (FBgn0266489). It is a protein_coding_gene from Dmel. It has one annotated transcript and one polypeptide. Gene sequence location is 2R:13580586..13593339. Its molecular function is described by: . It is involved in the biological process described with: . 3 alleles are reported. No phenotypic data is available. No phenotypic class da…		0.753651	0.477359	0.134484	0.511781	0.359837	A	G	FALSE	13	92	4.43478	31.2308	0.0787824	4	97	7.3299	18.75	0.157285	0.651133	0	43	4.27907	0	0	0	0	0.0766154	0.836078	0.759463	9	17	13	2R	13581168
CG6191	2R:13581233	CDS	CT	M	M	0.877482	1	0	Silent	FBgn0027581	-1	No	Cyclin_N	Predicted to be involved in regulation of cell cycle. Is expressed in adult head; embryonic/larval nervous system; embryonic/larval somatic muscle cell; gonad; and imaginal disc. Orthologous to human CABLES1 (Cdk5 and Abl enzyme substrate 1) and CABLES2 (Cdk5 and Abl enzyme substrate 2).	MINKSNRKLC	1.34038	1.15198	0.36848	1.28762	1.09303	G	A	FALSE	12	93	5.1828	34.9167	0.0664895	3	98	7.61224	23.3333	0	0.38662	0	43	4.02326	0	0	0	0	-0.122518	0.877482	1	9	15	12	2R	13581233
CG45088	2R:13581233	ThreePrimeUTR	CT	-	-	0.877482	1	0	-	FBgn0266489	-1	No	-	This gene is referred to in FlyBase by the symbol Dmel\CG45088 (FBgn0266489). It is a protein_coding_gene from Dmel. It has one annotated transcript and one polypeptide. Gene sequence location is 2R:13580586..13593339. Its molecular function is described by: . It is involved in the biological process described with: . 3 alleles are reported. No phenotypic data is available. No phenotypic class da…		0.753651	0.477359	0.134484	0.511781	0.359837	G	A	FALSE	12	93	5.1828	34.9167	0.0664895	3	98	7.61224	23.3333	0	0.38662	0	43	4.02326	0	0	0	0	-0.122518	0.877482	1	9	15	12	2R	13581233
tei	2R:13746561	CDS	GT	S	S	0.901333	0.8271	0	Silent	FBgn0000633	1	No	-	CG17716 encodes a predicted secreted immunoglobulin domain protein expressed in the embryonic central nervous system.	SNSIDDDEEE	2.94098	3.78244	0.298968	0.0434035	0.0188995	G	T	FALSE	10	95	5.06316	21.8	0.0706709	14	87	7.71264	59.1429	0.0777927	0.506541	0	43	1.5814	0	0	0	0	0.0742334	0.901333	0.8271	-4	24	10	2R	13746561
tei	2R:13746594	CDS	CT	L	L	0.820916	0.777674	0	Silent	FBgn0000633	1	No	-	CG17716 encodes a predicted secreted immunoglobulin domain protein expressed in the embryonic central nervous system.	LNRPEQIHFP	2.94098	3.78244	0.298968	0.0434035	0.0188995	C	T	FALSE	7	98	5.72449	23.2857	0.117659	12	89	7.65169	65	0.0956897	0.782713	0	43	1.60465	0	0	0	0	0.0432418	0.820916	0.777674	-5	19	7	2R	13746594
tei	2R:13748893	ThreePrimeUTR	CT	-	-	0.954254	0.84255	0	-	FBgn0000633	1	No	-	CG17716 encodes a predicted secreted immunoglobulin domain protein expressed in the embryonic central nervous system.		2.94098	3.78244	0.298968	0.0434035	0.0188995	C	T	FALSE	12	93	6.54839	22.75	0.0313076	6	95	10.3684	56.3333	0.109061	0.218251	0	43	1.60465	0	0	0	0	0.111704	0.954254	0.84255	6	18	12	2R	13748893
tei	2R:13748909	ThreePrimeUTR	TA	-	-	0.955619	0.804578	0	-	FBgn0000633	1	No	-	CG17716 encodes a predicted secreted immunoglobulin domain protein expressed in the embryonic central nervous system.		2.94098	3.78244	0.298968	0.0434035	0.0188995	T	A	FALSE	12	93	7.09677	24.9167	0.030409	7	94	11.4043	58.2857	0.101807	0.0974541	0	43	1.62791	0	0	0	0	0.151041	0.955619	0.804578	5	19	12	2R	13748909
fl(2)d	2R:13819885	ThreePrimeUTR	GT	-	-	0.858291	0.850804	0.735714	-	FBgn0000662	-1	No	-	Associated component of the WMM complex, a complex that mediates N6-methyladenosine (m6A) methylation of mRNAs, a modification that plays a role in the efficiency of mRNA splicing and is required for sex determination (PubMed:27919077). Required for sex determination and dosage compensation via Sxl alternative splicing: m6A methylation acts as a key regulator of Sxl pre-mRNA and promotes female-s…		2.60305	2.3359	0.329402	1.82327	1.73325	C	A	FALSE	14	91	16.2418	61.7143	0.0758995	14	87	19.3793	48.8571	0.0812296	0.946817	2	41	7.07317	12.5	0.164286	0.572542	0.618997	0.00748753	-11.6417	-11.6492	0	28	12	2R	13819885
fl(2)d	2R:13820094	ThreePrimeUTR	TA	-	-	0.835072	0.929487	0	-	FBgn0000662	-1	No	-	Associated component of the WMM complex, a complex that mediates N6-methyladenosine (m6A) methylation of mRNAs, a modification that plays a role in the efficiency of mRNA splicing and is required for sex determination (PubMed:27919077). Required for sex determination and dosage compensation via Sxl alternative splicing: m6A methylation acts as a key regulator of Sxl pre-mRNA and promotes female-s…		2.60305	2.3359	0.329402	1.82327	1.73325	A	T	FALSE	9	96	16.0312	50.1111	0.110079	12	89	16.382	34.1667	0.0705128	0.459602	0	43	6.62791	0	0	0	0	-0.0944155	0.835072	0.929487	-3	21	9	2R	13820094
fl(2)d	2R:13820617	CDS	GA	A	A	0.710866	0.892968	0.666667	Silent	FBgn0000662	-1	No	-	Associated component of the WMM complex, a complex that mediates N6-methyladenosine (m6A) methylation of mRNAs, a modification that plays a role in the efficiency of mRNA splicing and is required for sex determination (PubMed:27919077). Required for sex determination and dosage compensation via Sxl alternative splicing: m6A methylation acts as a key regulator of Sxl pre-mRNA and promotes female-s…	ARLARKRNYQ	2.60305	2.3359	0.329402	1.82327	1.73325	C	T	FALSE	11	94	15.3404	43	0.0812395	11	90	15.2556	19.3636	0.0721177	0.109237	1	42	5.5	12	0	0.878325	0.386322	-0.182102	-11.2891	-11.107	0	22	10	2R	13820617
fl(2)d	2R:13824501	FivePrimeUTR	CA	-	-	0.725452	0.799505	0.534632	-	FBgn0000662	-1	No	-	Associated component of the WMM complex, a complex that mediates N6-methyladenosine (m6A) methylation of mRNAs, a modification that plays a role in the efficiency of mRNA splicing and is required for sex determination (PubMed:27919077). Required for sex determination and dosage compensation via Sxl alternative splicing: m6A methylation acts as a key regulator of Sxl pre-mRNA and promotes female-s…		2.60305	2.3359	0.329402	1.82327	1.73325	G	T	FALSE	17	88	20.8864	61.5882	0.0572287	16	85	18.2706	51.5	0.0736303	0.430069	2	41	8.82927	21.5	0.0108225	0.280385	0.233457	-0.074053	-20.7745	-20.7005	1	33	15	2R	13824501
CG6329	2R:13829759	FivePrimeUTR	GT	-	-	0.530337	0.617018	0	-	FBgn0033872	1	No	-	Predicted to be involved in positive regulation of voltage-gated potassium channel activity; regulation of cholinergic synaptic transmission; and sleep. Is expressed in several structures, including adult heart; embryonic central brain neurons; embryonic/larval nervous system; extended germ band embryo; and presumptive embryonic/larval nervous system.		6.30782	5.19838	0.0246684	0.326178	0.229277	G	T	FALSE	45	60	30.15	67.2667	0.0415712	37	64	25.3906	37.5676	0.0423626	0.151215	0	43	4.7907	0	0	0	0	-0.0866812	0.530337	0.617018	8	82	45	2R	13829759
CG6329	2R:13830968	CDS	AC	G	G	0.508939	0.627506	0	Silent	FBgn0033872	1	No	-	Predicted to be involved in positive regulation of voltage-gated potassium channel activity; regulation of cholinergic synaptic transmission; and sleep. Is expressed in several structures, including adult heart; embryonic central brain neurons; embryonic/larval nervous system; extended germ band embryo; and presumptive embryonic/larval nervous system.	GLALLLNSRH	6.30782	5.19838	0.0246684	0.326178	0.229277	A	C	FALSE	51	54	34.1667	82.8824	0.0388308	39	62	22.7903	52.7179	0.0443644	0.0474075	0	43	4.74419	0	0	0	0	-0.118567	0.508939	0.627506	12	90	51	2R	13830968
CG6329	2R:13831452	ThreePrimeUTR	TC	-	-	0.633679	0.651497	0	-	FBgn0033872	1	No	-	Predicted to be involved in positive regulation of voltage-gated potassium channel activity; regulation of cholinergic synaptic transmission; and sleep. Is expressed in several structures, including adult heart; embryonic central brain neurons; embryonic/larval nervous system; extended germ band embryo; and presumptive embryonic/larval nervous system.		6.30782	5.19838	0.0246684	0.326178	0.229277	T	C	FALSE	40	65	21.8462	64.575	0.0443306	23	78	21.5513	28.6087	0.0675253	0.819306	0	43	4.72093	0	0	0	0	-0.0178179	0.633679	0.651497	17	63	40	2R	13831452
CG6329	2R:13831486	ThreePrimeUTR	CA	-	-	0.630915	0.602755	0	-	FBgn0033872	1	No	-	Predicted to be involved in positive regulation of voltage-gated potassium channel activity; regulation of cholinergic synaptic transmission; and sleep. Is expressed in several structures, including adult heart; embryonic central brain neurons; embryonic/larval nervous system; extended germ band embryo; and presumptive embryonic/larval nervous system.		6.30782	5.19838	0.0246684	0.326178	0.229277	C	A	FALSE	39	66	24.4242	59.9231	0.043677	23	78	21	29.4348	0.0691449	0.718457	0	43	4.72093	0	0	0	0	0.02816	0.630915	0.602755	16	62	39	2R	13831486
CG6329	2R:13831556	ThreePrimeUTR	CG	-	-	0.652674	0.657161	0	-	FBgn0033872	1	No	-	Predicted to be involved in positive regulation of voltage-gated potassium channel activity; regulation of cholinergic synaptic transmission; and sleep. Is expressed in several structures, including adult heart; embryonic central brain neurons; embryonic/larval nervous system; extended germ band embryo; and presumptive embryonic/larval nervous system.		6.30782	5.19838	0.0246684	0.326178	0.229277	C	G	FALSE	33	72	21.3472	50.6364	0.0469202	23	78	19.0641	24.5217	0.0650801	0.954409	0	43	4.74419	0	0	0	0	-0.00448766	0.652674	0.657161	10	56	33	2R	13831556
CG6329	2R:13831585	ThreePrimeUTR	TC	-	-	0.647865	0.652248	0	-	FBgn0033872	1	No	-	Predicted to be involved in positive regulation of voltage-gated potassium channel activity; regulation of cholinergic synaptic transmission; and sleep. Is expressed in several structures, including adult heart; embryonic central brain neurons; embryonic/larval nervous system; extended germ band embryo; and presumptive embryonic/larval nervous system.		6.30782	5.19838	0.0246684	0.326178	0.229277	T	C	FALSE	37	68	22.5882	58.7568	0.0477818	26	75	21.8667	26.4615	0.0627822	0.955113	0	43	4.74419	0	0	0	0	-0.00438356	0.647865	0.652248	11	63	37	2R	13831585
CG6329	2R:13831651	ThreePrimeUTR	TG	-	-	0.668538	0.600692	0	-	FBgn0033872	1	No	-	Predicted to be involved in positive regulation of voltage-gated potassium channel activity; regulation of cholinergic synaptic transmission; and sleep. Is expressed in several structures, including adult heart; embryonic central brain neurons; embryonic/larval nervous system; extended germ band embryo; and presumptive embryonic/larval nervous system.		6.30782	5.19838	0.0246684	0.326178	0.229277	T	G	FALSE	41	64	29.5312	59.439	0.0431648	25	76	23.1711	35.88	0.0612356	0.356575	0	43	4.72093	0	0	0	0	0.0678457	0.668538	0.600692	16	66	41	2R	13831651
CG6329	2R:13832058	ThreePrimeUTR	AT	-	-	0.637834	0.597506	0	-	FBgn0033872	1	No	-	Predicted to be involved in positive regulation of voltage-gated potassium channel activity; regulation of cholinergic synaptic transmission; and sleep. Is expressed in several structures, including adult heart; embryonic central brain neurons; embryonic/larval nervous system; extended germ band embryo; and presumptive embryonic/larval nervous system.		6.30782	5.19838	0.0246684	0.326178	0.229277	A	T	FALSE	55	50	47.24	81.1818	0.0390914	35	66	21.3485	56.7429	0.0504424	0.526388	0	43	4.7907	0	0	0	0	0.0403282	0.637834	0.597506	20	90	55	2R	13832058
CG6329	2R:13832088	ThreePrimeUTR	CT	-	-	0.664878	0.55595	0	-	FBgn0033872	1	No	-	Predicted to be involved in positive regulation of voltage-gated potassium channel activity; regulation of cholinergic synaptic transmission; and sleep. Is expressed in several structures, including adult heart; embryonic central brain neurons; embryonic/larval nervous system; extended germ band embryo; and presumptive embryonic/larval nervous system.		6.30782	5.19838	0.0246684	0.326178	0.229277	C	T	FALSE	49	56	33.8393	75.2653	0.0375489	37	64	18.9219	42.4865	0.0516494	0.0839608	0	43	4.76744	0	0	0	0	0.108927	0.664878	0.55595	12	86	49	2R	13832088
CG6329	2R:13832486	ThreePrimeUTR	GA	-	-	0.558526	0.623397	0	-	FBgn0033872	1	No	-	Predicted to be involved in positive regulation of voltage-gated potassium channel activity; regulation of cholinergic synaptic transmission; and sleep. Is expressed in several structures, including adult heart; embryonic central brain neurons; embryonic/larval nervous system; extended germ band embryo; and presumptive embryonic/larval nervous system.		6.30782	5.19838	0.0246684	0.326178	0.229277	G	A	FALSE	50	55	30.6545	73.04	0.0404751	34	67	28.597	47.2353	0.0515414	0.320615	0	43	4.74419	0	0	0	0	-0.0648712	0.558526	0.623397	16	84	50	2R	13832486
CG6329	2R:13833096	ThreePrimeUTR	TG	-	-	0.700222	0.727163	0	-	FBgn0033872	1	No	-	Predicted to be involved in positive regulation of voltage-gated potassium channel activity; regulation of cholinergic synaptic transmission; and sleep. Is expressed in several structures, including adult heart; embryonic central brain neurons; embryonic/larval nervous system; extended germ band embryo; and presumptive embryonic/larval nervous system.		6.30782	5.19838	0.0246684	0.326178	0.229277	T	G	FALSE	20	85	15.0471	35.25	0.0622614	16	85	14.6118	39.75	0.0760333	0.78352	0	43	4.72093	0	0	0	0	-0.0269407	0.700222	0.727163	4	36	20	2R	13833096
CG6357	2R:13840246	CDS	CA	H	N	0.870767	0.936539	0.616092	Missense	FBgn0033875	1	No	-	This gene is referred to in FlyBase by the symbol Dmel\CG6357 (FBgn0033875). It is a protein_coding_gene from Dmel. It has one annotated transcript and one polypeptide. Gene sequence location is 2R:13840053..13841743. Its molecular function is unknown. The biological processes in which it is involved are not known. 7 alleles are reported. No phenotypic data is available. The phenotypic class of a…	HTSGLSEFEE	1.58216	0.957686	0.219023	3.11342	3.49411	C	A	FALSE	13	92	11.9348	64	0.059512	5	96	11.0104	81.4	0.0445097	0.525103	14	29	6.34483	43	0.0474206	0.00243565	0.00147771	-0.0657719	-42.1292	-42.0635	8	18	-1	2R	13840246
CG6357	2R:13840253	CDS	CT	S	F	0.886977	0.915564	0.592728	Missense	FBgn0033875	1	No	-	This gene is referred to in FlyBase by the symbol Dmel\CG6357 (FBgn0033875). It is a protein_coding_gene from Dmel. It has one annotated transcript and one polypeptide. Gene sequence location is 2R:13840053..13841743. Its molecular function is unknown. The biological processes in which it is involved are not known. 7 alleles are reported. No phenotypic data is available. The phenotypic class of a…	SGLSEFEEEC	1.58216	0.957686	0.219023	3.11342	3.49411	C	T	FALSE	15	90	12.6111	73.6	0.0537427	5	96	10.7917	103.4	0.0611431	0.779242	16	27	6.07407	55.5625	0.0462441	0.000254112	0.00198917	-0.0285869	-54.6755	-54.6469	10	20	-1	2R	13840253
CG6357	2R:13840392	CDS	CG	H	Q	0.879571	0.849091	0.663144	Missense	FBgn0033875	1	No	Prot_inhib_I29	This gene is referred to in FlyBase by the symbol Dmel\CG6357 (FBgn0033875). It is a protein_coding_gene from Dmel. It has one annotated transcript and one polypeptide. Gene sequence location is 2R:13840053..13841743. Its molecular function is unknown. The biological processes in which it is involved are not known. 7 alleles are reported. No phenotypic data is available. The phenotypic class of a…	HYDNDYERQK	1.58216	0.957686	0.219023	3.11342	3.49411	C	G	FALSE	15	90	12.4333	104.067	0.0605065	5	96	10.6875	146.2	0.125772	0.812744	20	23	5.47826	55.45	0.0495689	0.00869625	0.124316	0.0304803	-54.5704	-54.6009	10	20	-5	2R	13840392
shot	2R:13881605	CDS	CT	N	N	0.72436	0.748468	0	Silent	FBgn0013733	-1	No	-	short stop (shot) encodes a member of the spectraplakin family of large cytoskeletal linker molecules. It binds both actin and microtubules, as well as scaffold proteins, certain signalling factors and calcium. It plays developmental and maintenance roles in the nervous system, the epidermis, at muscle attachments, the foregut, the wing, tracheae and oocytes.	NEAKALHNEL	3.15927	3.81751	0.00164051	1.26596	1.43746	G	A	FALSE	6	99	12.404	19.6667	0.134024	11	90	18.2889	30.7273	0.0783503	0.869631	0	43	5.25581	0	0	0	0	-0.0241077	0.72436	0.748468	-5	17	6	2R	13881605
shot	2R:13881704	CDS	CT	D	D	0.765152	0.714736	0	Silent	FBgn0013733	-1	No	-	short stop (shot) encodes a member of the spectraplakin family of large cytoskeletal linker molecules. It binds both actin and microtubules, as well as scaffold proteins, certain signalling factors and calcium. It plays developmental and maintenance roles in the nervous system, the epidermis, at muscle attachments, the foregut, the wing, tracheae and oocytes.	DKANEWLRSV	3.15927	3.81751	0.00164051	1.26596	1.43746	G	A	FALSE	4	101	13.198	19.5	0.196532	12	89	18.7528	31.5	0.0774388	0.774833	0	43	5.11628	0	0	0	0	0.0504159	0.765152	0.714736	-8	16	4	2R	13881704
shot	2R:13884557	CDS	TC	A	A	1	0.799307	0	Silent	FBgn0013733	-1	No	-	short stop (shot) encodes a member of the spectraplakin family of large cytoskeletal linker molecules. It binds both actin and microtubules, as well as scaffold proteins, certain signalling factors and calcium. It plays developmental and maintenance roles in the nervous system, the epidermis, at muscle attachments, the foregut, the wing, tracheae and oocytes.	AKLVRLPEAF	3.15927	3.81751	0.00164051	1.26596	1.43746	A	G	FALSE	3	102	13.402	47.6667	0	13	88	20.2955	33.5385	0.0706712	0.205358	0	43	5.32558	0	0	0	0	0.200693	1	0.799307	-10	16	3	2R	13884557
shot	2R:13884851	CDS	CT	L	L	0.809152	0.752377	0	Silent	FBgn0013733	-1	No	-	short stop (shot) encodes a member of the spectraplakin family of large cytoskeletal linker molecules. It binds both actin and microtubules, as well as scaffold proteins, certain signalling factors and calcium. It plays developmental and maintenance roles in the nervous system, the epidermis, at muscle attachments, the foregut, the wing, tracheae and oocytes.	LVDPKALYFA	3.15927	3.81751	0.00164051	1.26596	1.43746	G	A	FALSE	8	97	13.4433	32.625	0.125284	12	89	19.7416	40.25	0.0825698	0.696999	0	43	5.25581	0	0	0	0	0.0567747	0.809152	0.752377	-4	20	8	2R	13884851
shot	2R:13885220	CDS	GA	K	K	0.797107	0.753648	0	Silent	FBgn0013733	-1	No	-	short stop (shot) encodes a member of the spectraplakin family of large cytoskeletal linker molecules. It binds both actin and microtubules, as well as scaffold proteins, certain signalling factors and calcium. It plays developmental and maintenance roles in the nervous system, the epidermis, at muscle attachments, the foregut, the wing, tracheae and oocytes.	KELPLTEAIE	3.15927	3.81751	0.00164051	1.26596	1.43746	C	T	FALSE	10	95	14	22.9	0.0960766	15	86	15.2791	44.8	0.0847815	0.741609	0	43	5.04651	0	0	0	0	0.0434591	0.797107	0.753648	-5	25	10	2R	13885220
shot	2R:13885256	CDS	CT	P	P	0.781819	0.725742	0	Silent	FBgn0013733	-1	No	-	short stop (shot) encodes a member of the spectraplakin family of large cytoskeletal linker molecules. It binds both actin and microtubules, as well as scaffold proteins, certain signalling factors and calcium. It plays developmental and maintenance roles in the nervous system, the epidermis, at muscle attachments, the foregut, the wing, tracheae and oocytes.	PATTVFKNQL	3.15927	3.81751	0.00164051	1.26596	1.43746	G	A	FALSE	9	96	12.8854	22.3333	0.099587	15	86	14.0465	41.6667	0.0842061	0.678353	0	43	4.81395	0	0	0	0	0.0560776	0.781819	0.725742	-6	24	9	2R	13885256
shot	2R:13885268	CDS	TC	G	G	0.653585	0.745637	0	Silent	FBgn0013733	-1	No	-	short stop (shot) encodes a member of the spectraplakin family of large cytoskeletal linker molecules. It binds both actin and microtubules, as well as scaffold proteins, certain signalling factors and calcium. It plays developmental and maintenance roles in the nervous system, the epidermis, at muscle attachments, the foregut, the wing, tracheae and oocytes.	GFIDPATTVF	3.15927	3.81751	0.00164051	1.26596	1.43746	A	G	FALSE	9	96	12.5312	21.4444	0.120043	13	88	14.7727	41.1538	0.0932824	0.546494	0	43	4.74419	0	0	0	0	-0.0920519	0.653585	0.745637	-4	22	9	2R	13885268
shot	2R:13885271	CDS	GC	S	S	0.708515	0.745043	0	Silent	FBgn0013733	-1	No	-	short stop (shot) encodes a member of the spectraplakin family of large cytoskeletal linker molecules. It binds both actin and microtubules, as well as scaffold proteins, certain signalling factors and calcium. It plays developmental and maintenance roles in the nervous system, the epidermis, at muscle attachments, the foregut, the wing, tracheae and oocytes.	SGFIDPATTV	3.15927	3.81751	0.00164051	1.26596	1.43746	C	G	FALSE	9	96	12.1042	21	0.124409	13	88	14.7159	40.8462	0.0936675	0.813482	0	43	4.74419	0	0	0	0	-0.0365282	0.708515	0.745043	-4	22	9	2R	13885271
shot	2R:13885323	CDS	TG	F	C	0.678932	0.64122	0	Missense	FBgn0013733	-1	No	-	short stop (shot) encodes a member of the spectraplakin family of large cytoskeletal linker molecules. It binds both actin and microtubules, as well as scaffold proteins, certain signalling factors and calcium. It plays developmental and maintenance roles in the nervous system, the epidermis, at muscle attachments, the foregut, the wing, tracheae and oocytes.	FCDPTTGEYL	3.15927	3.81751	0.00164051	1.26596	1.43746	A	C	FALSE	6	99	12.4949	23.6667	0.145334	11	90	15.0556	45.0909	0.100915	0.830897	0	43	4.67442	0	0	0	0	0.0377123	0.678932	0.64122	-5	17	6	2R	13885323
shot	2R:13885607	CDS	TC	H	H	0.843277	0.746271	0	Silent	FBgn0013733	-1	No	-	short stop (shot) encodes a member of the spectraplakin family of large cytoskeletal linker molecules. It binds both actin and microtubules, as well as scaffold proteins, certain signalling factors and calcium. It plays developmental and maintenance roles in the nervous system, the epidermis, at muscle attachments, the foregut, the wing, tracheae and oocytes.	HPVTNRKLNL	3.15927	3.81751	0.00164051	1.26596	1.43746	A	G	FALSE	8	97	11.2062	23.5	0.103748	11	90	14.5556	44	0.0943155	0.502873	0	43	4.90698	0	0	0	0	0.0970058	0.843277	0.746271	-3	19	8	2R	13885607
shot	2R:13885702	CDS	CT	M	M	0.885714	0.805431	0	Silent	FBgn0013733	-1	No	-	short stop (shot) encodes a member of the spectraplakin family of large cytoskeletal linker molecules. It binds both actin and microtubules, as well as scaffold proteins, certain signalling factors and calcium. It plays developmental and maintenance roles in the nervous system, the epidermis, at muscle attachments, the foregut, the wing, tracheae and oocytes.	MGLIVDIENA	3.15927	3.81751	0.00164051	1.26596	1.43746	G	A	FALSE	7	98	11.6122	40.7143	0.114286	11	90	13.4889	41.5455	0.103624	0.620433	0	43	4.93023	0	0	0	0	0.0802834	0.885714	0.805431	-4	18	7	2R	13885702
shot	2R:13885706	CDS	AT	L	L	0.844444	0.799545	0	Silent	FBgn0013733	-1	No	-	short stop (shot) encodes a member of the spectraplakin family of large cytoskeletal linker molecules. It binds both actin and microtubules, as well as scaffold proteins, certain signalling factors and calcium. It plays developmental and maintenance roles in the nervous system, the epidermis, at muscle attachments, the foregut, the wing, tracheae and oocytes.	LSLGLIVDIE	3.15927	3.81751	0.00164051	1.26596	1.43746	T	A	FALSE	5	100	11.48	51.4	0.155556	11	90	13.4333	40.8182	0.106516	0.816337	0	43	4.88372	0	0	0	0	0.044899	0.844444	0.799545	-6	16	5	2R	13885706
shot	2R:13886075	CDS	CT	D	D	0.885531	0.854626	0	Silent	FBgn0013733	-1	No	-	short stop (shot) encodes a member of the spectraplakin family of large cytoskeletal linker molecules. It binds both actin and microtubules, as well as scaffold proteins, certain signalling factors and calcium. It plays developmental and maintenance roles in the nervous system, the epidermis, at muscle attachments, the foregut, the wing, tracheae and oocytes.	DTGIIDAQNS	3.15927	3.81751	0.00164051	1.26596	1.43746	G	A	FALSE	6	99	11.1212	56.3333	0.10086	11	90	13.6222	32.0909	0.0776958	0.813917	0	43	5.06977	0	0	0	0	0.0309047	0.885531	0.854626	-5	17	6	2R	13886075
AGO1	2R:13943922	ThreePrimeUTR	TG	-	-	0.67298	0.528136	0	-	FBgn0262739	-1	No	-	Argonaute-1 (AGO1) encodes an Argonaute/Piwi family protein, which interacts with microRNAs to form miRNA-induced silencing complexes (miRISCs). miRISCs are guided to target and repress mRNAs either by transcript destabilisation, translational inhibition, or both.		3.78457	4.40809	0.0232392	1.80517	1.60428	A	C	FALSE	4	101	17.604	19.25	0.189617	19	82	20.2805	30.9474	0.0747856	0.439473	0	43	5.55814	0	0	0	0	0.144844	0.67298	0.528136	-15	23	4	2R	13943922
Prosap	2R:14140343	FivePrimeUTR	GA	-	-	0.677076	0.724601	0	-	FBgn0040752	-1	No	-	Prosap (Prosap) encodes a member of SH3 and multiple ankyrin repeat domain (SHANK) family of genes that encode synaptic scaffolding proteins. It regulates synaptic growth and development, including the structure of the neuromuscular junction and synapses of the calyx, and olfactory acuity.		3.67189	3.09119	0.0790468	0.867644	0.923605	C	T	FALSE	15	90	53.1667	78.9333	0.0856654	8	93	45.1828	39.875	0.0842879	0.724469	0	43	8.88372	0	0	0	0	-0.0475248	0.677076	0.724601	7	23	15	2R	14140343
CG13016	2R:14158285	CDS	GA	M	L	0.990476	0.777427	0	Missense	FBgn0033899	1	No	Uncharacterised_TMEM39	Predicted to be active in membrane. Is expressed in organism. Orthologous to human TMEM39A (transmembrane protein 39A) and TMEM39B (transmembrane protein 39B).	MVKIRKRNEK	1.52419	2.00512	0.972817	0.908006	1.19727	G	A	FALSE	5	100	19.94	25	0.00952381	14	87	17.2529	30.1429	0.0826523	0.149149	0	43	5.4186	0	0	0	0	0.213049	0.990476	0.777427	-9	19	5	2R	14158285
O-fut1	2R:14162541	CDS	CA	P	T	0.604369	0.744134	0.857143	Missense	FBgn0033901	1	No	GDP-Fuc_O-FucTrfase	Catalyzes the reaction that attaches fucose through an O-glycosidic linkage to a conserved serine or threonine residue found in the consensus sequence C2-X(4,5)-[S/T]-C3 of EGF domains, where C2 and C3 are the second and third conserved cysteines (PubMed:12909620). Specifically uses GDP-fucose as donor substrate and proper disulfide pairing of the substrate EGF domains is required for fucose tran…	PEDDPYLDLA	2.90082	3.17256	0.961242	0.863174	1.40652	C	A	FALSE	12	93	26.3333	37.1667	0.0852451	16	85	24.4471	45.625	0.0694687	0.210989	1	42	5.90476	14	0	0.428308	0.698729	-0.139765	-13.3956	-13.2559	-4	28	11	2R	14162541
eIF3m	2R:14163780	CDS	GC	T	T	0.572654	0.598567	0.495284	Silent	FBgn0033902	-1	No	-	eukaryotic translation initiation factor 3 subunit m (eIF3m) encodes a non core component of the EIF3 translation initiation factor. The product of eIF3m functions during caspase mediated remodeling of the syncytial testis, where it interacts with the apoptosome.	TADNACVARE	6.59068	6.83618	0.93599	5.76981	5.6464	C	G	FALSE	47	58	84.9483	95.766	0.0323576	58	43	62.6512	101.517	0.034717	0.593064	23	20	35.15	28.087	0.0192344	0.113899	0.0719412	-0.0259129	-27.5143	-27.4884	-11	105	24	2R	14163780
ReepB	2R:14172328	CDS	TG	W	G	0.567592	0.533249	0.49795	Missense	FBgn0033906	1	No	-	Involved in endoplasmic reticulum organization. Located in axon and endoplasmic reticulum. Is expressed in adult head; adult heart; and embryonic/larval salivary gland. Orthologous to human REEP5 (receptor accessory protein 5).	WGAQLLCNII	8.82339	8.47452	0.973655	7.40431	7.35215	T	G	FALSE	60	45	276.444	141.083	0.0295013	67	34	193.941	153.821	0.0268478	0.389885	24	19	98	60.2917	0.0171023	0.150857	0.446324	0.0343427	-59.7241	-59.7584	-7	127	36	2R	14172328
ReepB	2R:14172453	CDS	AC	G	G	0.552315	0.529115	0.486083	Silent	FBgn0033906	1	No	TB2_DP1_HVA22	Involved in endoplasmic reticulum organization. Located in axon and endoplasmic reticulum. Is expressed in adult head; adult heart; and embryonic/larval salivary gland. Orthologous to human REEP5 (receptor accessory protein 5).	GIFTVIEFFS	8.82339	8.47452	0.973655	7.40431	7.35215	A	C	FALSE	62	43	263.605	196.29	0.0285518	62	39	165.256	228.871	0.0284406	0.565888	24	19	94.1579	85.1667	0.0108798	0.158434	0.356016	0.0232	-84.6144	-84.6376	0	124	38	2R	14172453
mRpS16	2R:14173073	CDS	TC	A	A	0.634455	0.785261	0	Silent	FBgn0033907	-1	No	-	Predicted to be a structural constituent of ribosome. Predicted to be involved in mitochondrial translation. Predicted to be located in ribosome. Predicted to be part of mitochondrial small ribosomal subunit. Is expressed in adult head. Human ortholog(s) of this gene implicated in combined oxidative phosphorylation deficiency 2. Orthologous to human MRPS16 (mitochondrial ribosomal protein S16).	AEAEASPEKA	2.9769	2.95758	0.828541	2.15934	1.92185	A	G	FALSE	18	87	26.0345	38.5	0.0605751	22	79	19.8481	28.9545	0.0587474	0.0840036	0	43	6.62791	0	0	0	0	-0.150806	0.634455	0.785261	-4	40	18	2R	14173073
mRpS16	2R:14173148	CDS	CT	L	L	0.655668	0.723032	0	Silent	FBgn0033907	-1	No	-	Predicted to be a structural constituent of ribosome. Predicted to be involved in mitochondrial translation. Predicted to be located in ribosome. Predicted to be part of mitochondrial small ribosomal subunit. Is expressed in adult head. Human ortholog(s) of this gene implicated in combined oxidative phosphorylation deficiency 2. Orthologous to human MRPS16 (mitochondrial ribosomal protein S16).	LLGIAGLLPI	2.9769	2.95758	0.828541	2.15934	1.92185	G	A	FALSE	19	86	25.7558	40.3158	0.068268	18	83	21.5422	30.2778	0.0719351	0.501141	0	43	6.97674	0	0	0	0	-0.067364	0.655668	0.723032	1	37	19	2R	14173148
mRpS16	2R:14173501	FivePrimeUTR	TC	-	-	0.657902	0.782569	0	-	FBgn0033907	-1	No	-	Predicted to be a structural constituent of ribosome. Predicted to be involved in mitochondrial translation. Predicted to be located in ribosome. Predicted to be part of mitochondrial small ribosomal subunit. Is expressed in adult head. Human ortholog(s) of this gene implicated in combined oxidative phosphorylation deficiency 2. Orthologous to human MRPS16 (mitochondrial ribosomal protein S16).		2.9769	2.95758	0.828541	2.15934	1.92185	A	G	FALSE	17	88	29.7727	62.7647	0.064477	21	80	21.75	40	0.0614725	0.172858	0	43	7.30233	0	0	0	0	-0.124667	0.657902	0.782569	-4	38	17	2R	14173501
cg	2R:14173877	FivePrimeUTR	AC	-	-	0.703587	0.679571	0.370523	-	FBgn0000289	1	No	-	combgap (cg) encodes a DNA binding protein that can act as a repressor or activator of gene expression depending on context. It binds to Polycomb Response Elements and is necessary to recruit Polycomb protein complexes to some of them.		3.89465	2.86721	0.278372	1.66642	1.81859	A	C	FALSE	8	97	41.0928	42.25	0.103132	19	82	27.2317	50.2105	0.0818713	0.868202	5	38	9.86842	29.4	0.0458095	0.0336085	0.072343	0.0240167	-28.6964	-28.7204	-11	27	3	2R	14173877
cg	2R:14174188	FivePrimeUTR	GA	-	-	0.57222	0.744488	0.476708	-	FBgn0000289	1	No	-	combgap (cg) encodes a DNA binding protein that can act as a repressor or activator of gene expression depending on context. It binds to Polycomb Response Elements and is necessary to recruit Polycomb protein complexes to some of them.		3.89465	2.86721	0.278372	1.66642	1.81859	G	A	FALSE	7	98	30.8469	31.5714	0.0855564	18	83	20.8072	33.7222	0.0747596	0.204551	4	39	8.66667	20.5	0.0250613	0.436343	0.11395	-0.172267	-19.9278	-19.7555	-11	25	3	2R	14174188
Opa1	2R:14230770	ThreePrimeUTR	GC	-	-	0.726855	0.779762	0	-	FBgn0261276	-1	No	-	Optic atrophy 1 (Opa1) encodes a dynamin-related GTPase that mediates fusion of the inner membrane of mitochondria. It usually works with the product of Marf to coordinately fuse both mitochondrial membranes. The product of Opa1 activity is regulated by proteolytic processing.		2.40495	3.13511	0.394098	1.90917	1.64868	C	G	FALSE	17	88	19.9545	39.0588	0.0802949	27	74	15.2703	34.4444	0.0503705	0.558992	0	43	6.37209	0	0	0	0	-0.0529076	0.726855	0.779762	-10	44	17	2R	14230770
Opa1	2R:14230920	CDS	GA	K	K	0.795512	0.840381	0.461538	Silent	FBgn0261276	-1	No	OPA1_C	Optic atrophy 1 (Opa1) encodes a dynamin-related GTPase that mediates fusion of the inner membrane of mitochondria. It usually works with the product of Marf to coordinately fuse both mitochondrial membranes. The product of Opa1 activity is regulated by proteolytic processing.	KRVLLAEELI	2.40495	3.13511	0.394098	1.90917	1.64868	C	T	FALSE	14	91	20.3297	60.7857	0.0760504	23	78	17.0513	56.9565	0.0502358	0.61113	2	41	6.4878	13	0.0769231	0.131417	0.0405078	-0.0448693	-12.2045	-12.1596	-9	37	12	2R	14230920
Opa1	2R:14231597	CDS	TA	G	G	0.876812	0.955511	0	Silent	FBgn0261276	-1	No	OPA1_C	Optic atrophy 1 (Opa1) encodes a dynamin-related GTPase that mediates fusion of the inner membrane of mitochondria. It usually works with the product of Marf to coordinately fuse both mitochondrial membranes. The product of Opa1 activity is regulated by proteolytic processing.	GPGQMRRITH	2.40495	3.13511	0.394098	1.90917	1.64868	A	T	FALSE	7	98	17.449	37	0.0982565	11	90	13.4889	48.2727	0.0283581	0.367998	0	43	4.72093	0	0	0	0	-0.0786994	0.876812	0.955511	-4	18	7	2R	14231597
Opa1	2R:14231614	CDS	TC	L	L	0.876812	0.965556	0	Silent	FBgn0261276	-1	No	OPA1_C	Optic atrophy 1 (Opa1) encodes a dynamin-related GTPase that mediates fusion of the inner membrane of mitochondria. It usually works with the product of Marf to coordinately fuse both mitochondrial membranes. The product of Opa1 activity is regulated by proteolytic processing.	LAQMFGPGQM	2.40495	3.13511	0.394098	1.90917	1.64868	A	G	FALSE	6	99	17.8081	43.1667	0.123188	12	89	13.3708	45.5833	0.0216038	0.338095	0	43	4.81395	0	0	0	0	-0.088744	0.876812	0.965556	-6	18	6	2R	14231614
Opa1	2R:14231615	CDS	TC	T	T	0.888889	0.970391	0	Silent	FBgn0261276	-1	No	OPA1_C	Optic atrophy 1 (Opa1) encodes a dynamin-related GTPase that mediates fusion of the inner membrane of mitochondria. It usually works with the product of Marf to coordinately fuse both mitochondrial membranes. The product of Opa1 activity is regulated by proteolytic processing.	TLAQMFGPGQ	2.40495	3.13511	0.394098	1.90917	1.64868	A	G	FALSE	6	99	17.596	46.1667	0.111111	13	88	13.2614	45.6923	0.018354	0.309774	0	43	4.7907	0	0	0	0	-0.0815018	0.888889	0.970391	-7	19	6	2R	14231615
Opa1	2R:14234742	CDS	GT	S	S	0.82593	0.833503	0	Silent	FBgn0261276	-1	No	-	Optic atrophy 1 (Opa1) encodes a dynamin-related GTPase that mediates fusion of the inner membrane of mitochondria. It usually works with the product of Marf to coordinately fuse both mitochondrial membranes. The product of Opa1 activity is regulated by proteolytic processing.	SRNLIEVGSL	2.40495	3.13511	0.394098	1.90917	1.64868	C	A	FALSE	5	100	18.14	36.4	0.13437	11	90	14.0444	31	0.0682963	0.95599	0	43	4.27907	0	0	0	0	-0.00757224	0.82593	0.833503	-6	16	5	2R	14234742
CG8547	2R:14261867	CDS	AT	S	S	0.736589	0.541652	0.520005	Silent	FBgn0033919	-1	No	-	Is expressed in adult head; adult heart; and presumptive embryonic/larval system.	SKTKTKSGGA	1.59954	1.67332	0.972817	5.30815	5.08423	T	A	FALSE	8	97	20.9381	52.5	0.0785574	12	89	12.5618	36.75	0.078745	0.110345	20	23	30.6087	41	0.0260505	0.00219404	0.756474	0.194937	-40.2634	-40.4583	-4	20	-12	2R	14261867
CG8547	2R:14262097	CDS	GC	S	S	0.575305	0.555531	0.475616	Silent	FBgn0033919	-1	No	-	Is expressed in adult head; adult heart; and presumptive embryonic/larval system.	SPNQQHVPSV	1.59954	1.67332	0.972817	5.30815	5.08423	C	G	FALSE	6	99	21.1313	40.8333	0.106318	10	91	12.7143	32.5	0.091079	0.892588	15	28	22.3571	26.6	0.0258363	0.209357	0.329174	0.0197741	-26.0247	-26.0445	-4	16	-9	2R	14262097
CG8547	2R:14264047	CDS	CT	A	V	0.864773	0.738384	0.440696	Missense	FBgn0033919	-1	No	-	Is expressed in adult head; adult heart; and presumptive embryonic/larval system.	AYKKSSYQYS	1.59954	1.67332	0.972817	5.30815	5.08423	G	A	FALSE	5	100	14.28	21.2	0.0732139	6	95	10.3895	18.6667	0.126002	0.433539	12	31	12.8387	30	0.0384905	4.99294e-05	0.0103236	0.126389	-29.1352	-29.2616	-1	11	-7	2R	14264047
Ih	2R:14276241	FivePrimeUTR	GC	-	-	0.648764	0.607136	0	-	FBgn0263397	1	No	-	I[[h]] channel (Ih) encodes a low-threshold, voltage-gated ion channel. It may influence excitatory postsynaptic potential kinetics and integration.		4.3136	3.68182	0.0111521	1.23315	1.33225	G	C	FALSE	45	60	63.4333	92.6667	0.0407465	42	59	31.6441	70.4286	0.0445522	0.491566	0	43	3.44186	0	0	0	0	0.0416283	0.648764	0.607136	3	87	45	2R	14276241
Ih	2R:14276242	FivePrimeUTR	AT	-	-	0.644989	0.606457	0	-	FBgn0263397	1	No	-	I[[h]] channel (Ih) encodes a low-threshold, voltage-gated ion channel. It may influence excitatory postsynaptic potential kinetics and integration.		4.3136	3.68182	0.0111521	1.23315	1.33225	A	T	FALSE	44	61	63.6066	93.6136	0.041475	42	59	31.7119	70.2381	0.0446339	0.52835	0	43	3.44186	0	0	0	0	0.0385324	0.644989	0.606457	2	86	44	2R	14276242
Ih	2R:14276342	FivePrimeUTR	CT	-	-	0.63247	0.629665	0	-	FBgn0263397	1	No	-	I[[h]] channel (Ih) encodes a low-threshold, voltage-gated ion channel. It may influence excitatory postsynaptic potential kinetics and integration.		4.3136	3.68182	0.0111521	1.23315	1.33225	C	T	FALSE	44	61	59.2623	86.2727	0.0425765	42	59	35.2881	57.2143	0.0443059	0.96369	0	43	3.4186	0	0	0	0	0.00280452	0.63247	0.629665	2	86	44	2R	14276342
Ih	2R:14277696	FivePrimeUTR	GA	-	-	0.848406	0.879967	0	-	FBgn0263397	1	No	-	I[[h]] channel (Ih) encodes a low-threshold, voltage-gated ion channel. It may influence excitatory postsynaptic potential kinetics and integration.		4.3136	3.68182	0.0111521	1.23315	1.33225	G	A	FALSE	13	92	31.1196	38.4615	0.0566732	15	86	19.3721	29.8	0.0578143	0.701749	0	43	3.4186	0	0	0	0	-0.0315613	0.848406	0.879967	-2	28	13	2R	14277696
Ih	2R:14277734	FivePrimeUTR	TC	-	-	0.860659	0.839245	0	-	FBgn0263397	1	No	-	I[[h]] channel (Ih) encodes a low-threshold, voltage-gated ion channel. It may influence excitatory postsynaptic potential kinetics and integration.		4.3136	3.68182	0.0111521	1.23315	1.33225	T	C	FALSE	15	90	33.1778	36.2667	0.0530524	13	88	21.1477	33.5385	0.0754775	0.814612	0	43	3.4186	0	0	0	0	0.0214134	0.860659	0.839245	2	28	15	2R	14277734
Ih	2R:14278193	FivePrimeUTR	CT	-	-	0.809587	0.753181	0	-	FBgn0263397	1	No	-	I[[h]] channel (Ih) encodes a low-threshold, voltage-gated ion channel. It may influence excitatory postsynaptic potential kinetics and integration.		4.3136	3.68182	0.0111521	1.23315	1.33225	C	T	FALSE	8	97	34.8454	36.5	0.0833695	12	89	19.9775	29.4167	0.0699528	0.612597	0	43	3.4186	0	0	0	0	0.0564062	0.809587	0.753181	-4	20	8	2R	14278193
Ih	2R:14278216	FivePrimeUTR	TC	-	-	0.722446	0.746715	0	-	FBgn0263397	1	No	-	I[[h]] channel (Ih) encodes a low-threshold, voltage-gated ion channel. It may influence excitatory postsynaptic potential kinetics and integration.		4.3136	3.68182	0.0111521	1.23315	1.33225	T	C	FALSE	16	89	32.2921	31.5625	0.0781901	14	87	19.5287	29.3571	0.0765398	0.82711	0	43	3.4186	0	0	0	0	-0.0242691	0.722446	0.746715	2	30	16	2R	14278216
Ih	2R:14278289	FivePrimeUTR	CA	-	-	0.773798	0.756933	0	-	FBgn0263397	1	No	-	I[[h]] channel (Ih) encodes a low-threshold, voltage-gated ion channel. It may influence excitatory postsynaptic potential kinetics and integration.		4.3136	3.68182	0.0111521	1.23315	1.33225	C	A	FALSE	13	92	33.0217	33.6154	0.0722359	14	87	20.1724	35.9286	0.072148	0.870301	0	43	3.39535	0	0	0	0	0.016865	0.773798	0.756933	-1	27	13	2R	14278289
Ih	2R:14278848	FivePrimeUTR	AT	-	-	0.585399	0.706203	0	-	FBgn0263397	1	No	-	I[[h]] channel (Ih) encodes a low-threshold, voltage-gated ion channel. It may influence excitatory postsynaptic potential kinetics and integration.		4.3136	3.68182	0.0111521	1.23315	1.33225	A	T	FALSE	16	89	44.1798	54.75	0.085045	22	79	22.9873	51.4545	0.0590302	0.23566	0	43	3.4186	0	0	0	0	-0.120805	0.585399	0.706203	-6	38	16	2R	14278848
Ih	2R:14279056	FivePrimeUTR	CA	-	-	0.518013	0.602722	0	-	FBgn0263397	1	No	-	I[[h]] channel (Ih) encodes a low-threshold, voltage-gated ion channel. It may influence excitatory postsynaptic potential kinetics and integration.		4.3136	3.68182	0.0111521	1.23315	1.33225	C	A	FALSE	25	80	43.8375	46.72	0.064265	22	79	17.2658	55.3182	0.0602314	0.34531	0	43	3.44186	0	0	0	0	-0.0847086	0.518013	0.602722	3	47	25	2R	14279056
Arc1	2R:14358479	ThreePrimeUTR	GA	-	-	0.516066	0.478118	0.564824	-	FBgn0033926	-1	No	-	Master regulator of synaptic plasticity that self-assembles into virion-like capsids that encapsulate RNAs and mediate intercellular RNA transfer from motorneurons to muscles (PubMed:29328915). Arc1 protein is released from motorneurons in extracellular vesicles that mediate the transfer of Arc1 mRNA into muscle cells, where Arc1 mRNA can undergo activity-dependent translation (PubMed:29328915). …		8.8001	10.4298	1.75221e-12	6.99997	7.09814	C	T	FALSE	29	76	238.632	176.241	0.0371426	18	83	767.506	313.889	0.0434809	0.518423	15	28	109.571	181.867	0.0128224	0.360458	0.0876491	0.0379474	-181.351	-181.389	11	47	14	2R	14358479
Arc1	2R:14358573	ThreePrimeUTR	AC	-	-	0.51896	0.529773	0.646081	-	FBgn0033926	-1	No	-	Master regulator of synaptic plasticity that self-assembles into virion-like capsids that encapsulate RNAs and mediate intercellular RNA transfer from motorneurons to muscles (PubMed:29328915). Arc1 protein is released from motorneurons in extracellular vesicles that mediate the transfer of Arc1 mRNA into muscle cells, where Arc1 mRNA can undergo activity-dependent translation (PubMed:29328915). …		8.8001	10.4298	1.75221e-12	6.99997	7.09814	T	G	FALSE	29	76	139.329	117.483	0.0373576	16	85	428.976	219.125	0.039907	0.854134	14	29	45.4483	67.1429	0.0326734	0.0357907	0.0350781	-0.010813	-66.6239	-66.6131	13	45	15	2R	14358573
Arc1	2R:14359830	CDS	CT	P	L	0.478444	0.534141	0.558661	Missense	FBgn0033926	-1	No	-	Master regulator of synaptic plasticity that self-assembles into virion-like capsids that encapsulate RNAs and mediate intercellular RNA transfer from motorneurons to muscles (PubMed:29328915). Arc1 protein is released from motorneurons in extracellular vesicles that mediate the transfer of Arc1 mRNA into muscle cells, where Arc1 mRNA can undergo activity-dependent translation (PubMed:29328915). …	PAYQIYMEFF	8.8001	10.4298	1.75221e-12	6.99997	7.09814	G	A	FALSE	31	74	281.838	240.968	0.0256137	16	85	860.553	489.812	0.0147465	0.142828	13	30	110.167	217.308	0.024509	0.0677082	0.379584	-0.0556979	-216.829	-216.774	15	47	18	2R	14359830
phyl	2R:14428349	CDS	GA	P	P	0.752433	1	0	Silent	FBgn0013725	-1	No	-	Essential adapter component of E3 ubiquitin ligase complexes; involved in R7 photoreceptor cell differentiation, embryonic nervous system, external sensory organ development and specification of particular muscles. E3 ubiquitin ligase complexes mediate ubiquitination and subsequent proteasomal degradation of target proteins. Required for specification of R7 photoreceptor cell fate in the eye by p…	PQGQKRSNAI	4.04679	3.25023	0.0947615	0.216102	0.120353	C	T	FALSE	11	94	24.3723	44.1818	0.0891736	2	99	30.6768	22	0	0.277673	0	43	4.81395	0	0	0	0	-0.247567	0.752433	1	9	13	11	2R	14428349
Rpn6	2R:14751310	CDS	TC	A	A	0.62825	0.533172	0.544495	Silent	FBgn0028689	-1	No	-	Regulatory particle non-ATPase 6 (Rpn6) encodes a structural subunit of the 26S proteasome, located in the lid section of the 19S regulatory particle. In the 26S proteasome, it forms a bridge between the 19S regulatory and 20S core particles.	ADERDFKTAF	5.22049	6.17786	0.412321	5.26645	4.73751	A	G	FALSE	15	90	29.9778	50.7333	0.0559536	6	95	48	54.5	0.13703	0.447009	10	33	24.7879	24.4	0.0447759	0.293585	0.925561	0.0950775	-23.7718	-23.8668	9	21	5	2R	14751310
Rpn6	2R:14751322	CDS	CT	I	I	0.628602	0.520345	0.517656	Silent	FBgn0028689	-1	No	-	Regulatory particle non-ATPase 6 (Rpn6) encodes a structural subunit of the 26S proteasome, located in the lid section of the 19S regulatory particle. In the 26S proteasome, it forms a bridge between the 19S regulatory and 20S core particles.	ILHAADERDF	5.22049	6.17786	0.412321	5.26645	4.73751	G	A	FALSE	15	90	29.1111	49.9333	0.0533809	6	95	46.8421	53.6667	0.14637	0.391507	8	35	23.1143	25.375	0.038144	0.173638	0.984161	0.108257	-24.7464	-24.8547	9	21	7	2R	14751322
Rpn6	2R:14751340	CDS	GA	M	L	0.622249	0.546346	0.575644	Missense	FBgn0028689	-1	No	-	Regulatory particle non-ATPase 6 (Rpn6) encodes a structural subunit of the 26S proteasome, located in the lid section of the 19S regulatory particle. In the 26S proteasome, it forms a bridge between the 19S regulatory and 20S core particles.	MDLQSGILHA	5.22049	6.17786	0.412321	5.26645	4.73751	C	T	FALSE	14	91	30.6484	51	0.059123	7	94	50.8191	48.4286	0.11613	0.522371	7	36	23.25	24	0.0426582	0.609164	0.816795	0.0759032	-23.3778	-23.4537	7	21	7	2R	14751340
Rpn6	2R:14751941	CDS	CA	R	R	0.674972	0.485119	0.524198	Silent	FBgn0028689	-1	No	Rpn6_N	Regulatory particle non-ATPase 6 (Rpn6) encodes a structural subunit of the 26S proteasome, located in the lid section of the 19S regulatory particle. In the 26S proteasome, it forms a bridge between the 19S regulatory and 20S core particles.	RDQEGAENDE	5.22049	6.17786	0.412321	5.26645	4.73751	G	T	FALSE	15	90	29.4667	51.7333	0.0602515	6	95	45.2211	37.8333	0.125662	0.139824	7	36	15.9167	20.2857	0.0383239	0.120301	0.756159	0.189853	-19.6107	-19.8006	9	21	8	2R	14751941
ND-B15	2R:14756883	CDS	TC	L	L	0.617271	0.514294	0.499663	Silent	FBgn0033961	1	No	NADH_UbQ_OxRdtase_NDUFB4_su	Predicted to be involved in mitochondrial respiratory chain complex I assembly. Located in mitochondrion. Is expressed in adult head; adult heart; and spermatozoon. Orthologous to human NDUFB4 (NADH:ubiquinone oxidoreductase subunit B4).	LFAVVLPIAL	6.23063	6.18795	0.935588	5.63755	5.75018	T	C	FALSE	19	86	46.5698	70.2105	0.0546274	11	90	54.3222	82.9091	0.0826535	0.289173	10	33	14.5455	43.2	0.0502871	0.172868	0.884279	0.102977	-42.5827	-42.6857	8	30	9	2R	14756883
Spred	2R:14760649	ThreePrimeUTR	AT	-	-	0.596979	0.498918	0	-	FBgn0020767	-1	No	-	Predicted to enable protein kinase binding activity. Involved in negative regulation of ERK1 and ERK2 cascade. Located in cytosol. Is expressed in several structures, including adult head; central nervous system; embryonic epidermis; embryonic/larval midgut; and embryonic/larval nervous system. Human ortholog(s) of this gene implicated in Noonan syndrome. Orthologous to several human genes includ…		4.17724	4.21566	0.897783	1.14328	0.951162	T	A	FALSE	13	92	26.4022	46.3077	0.0703823	5	96	26.1667	27	0.0394985	0.418039	0	43	2.37209	0	0	0	0	0.0980612	0.596979	0.498918	8	18	13	2R	14760649
igl	2R:15155874	FivePrimeUTR	AT	-	-	0.734033	0.767618	0	-	FBgn0013467	1	No	-	igloo (igl) encodes a calmodulin binding protein.		4.59254	5.58549	0.494189	0.0879829	0.121945	A	T	FALSE	11	94	11.234	45.8182	0.0847785	6	95	32.5474	39	0.124723	0.822289	0	43	1	0	0	0	0	-0.0335851	0.734033	0.767618	5	17	11	2R	15155874
igl	2R:15188904	CDS	CT	P	P	0.795215	0.676326	0	Silent	FBgn0013467	1	No	-	igloo (igl) encodes a calmodulin binding protein.	PELNKAATKI	4.59254	5.58549	0.494189	0.0879829	0.121945	C	T	FALSE	15	90	23.4667	44.8	0.0610219	7	94	37.4043	58	0.108892	0.316827	0	43	0.976744	0	0	0	0	0.118889	0.795215	0.676326	8	22	15	2R	15188904
igl	2R:15189843	ThreePrimeUTR	GC	-	-	0.764202	0.768686	0	-	FBgn0013467	1	No	-	igloo (igl) encodes a calmodulin binding protein.		4.59254	5.58549	0.494189	0.0879829	0.121945	G	C	FALSE	12	93	40.0108	41.25	0.0908313	10	91	61.9231	39.3	0.0957601	0.973333	0	43	1.04651	0	0	0	0	-0.00448394	0.764202	0.768686	2	22	12	2R	15189843
Flo1	2R:15567324	CDS	GA	E	E	0.622005	0.9375	0.25	Silent	FBgn0024754	-1	No	-	May act as a scaffolding protein within caveolar membranes, functionally participating in formation of caveolae or caveolae-like vesicles. (UniProtKB:O61491)	EAEKFRMEKL	5.86928	5.98113	0.893514	2.83351	2.97426	C	T	FALSE	14	91	46.2967	71.6429	0.0796758	1	100	46.8	64	0	0.325243	1	42	4.97619	12	0	0.249485	0	-0.315495	-11.378	-11.0625	13	15	13	2R	15567324
Flo1	2R:15569173	FivePrimeUTR	GA	-	-	0.616762	0	0	-	FBgn0024754	-1	No	-	May act as a scaffolding protein within caveolar membranes, functionally participating in formation of caveolae or caveolae-like vesicles. (UniProtKB:O61491)		5.86928	5.98113	0.893514	2.83351	2.97426	C	T	FALSE	13	92	30.1957	34.4615	0.0796269	0	101	34.0099	0	0	0	0	43	2.69767	0	0	0	0	0.616762	0.616762	0	13	13	13	2R	15569173
CG30466	2R:15569173	FivePrimeUTR	CT	-	-	0.616762	0	0	-	FBgn0050466	1	No	-	Predicted to be involved in SCF-dependent proteasomal ubiquitin-dependent protein catabolic process. Predicted to be part of SCF ubiquitin ligase complex.		0.558969	0.537024	0.362038	0.316113	0.462703	C	T	FALSE	13	92	30.1957	34.4615	0.0796269	0	101	34.0099	0	0	0	0	43	2.69767	0	0	0	0	0.616762	0.616762	0	13	13	13	2R	15569173
Flo1	2R:15569181	FivePrimeUTR	GC	-	-	0.61253	0	0	-	FBgn0024754	-1	No	-	May act as a scaffolding protein within caveolar membranes, functionally participating in formation of caveolae or caveolae-like vesicles. (UniProtKB:O61491)		5.86928	5.98113	0.893514	2.83351	2.97426	C	G	FALSE	12	93	32.828	37.75	0.0903613	0	101	35.1386	0	0	0	0	43	2.7907	0	0	0	0	0.61253	0.61253	0	12	12	12	2R	15569181
CG30466	2R:15569181	FivePrimeUTR	CG	-	-	0.61253	0	0	-	FBgn0050466	1	No	-	Predicted to be involved in SCF-dependent proteasomal ubiquitin-dependent protein catabolic process. Predicted to be part of SCF ubiquitin ligase complex.		0.558969	0.537024	0.362038	0.316113	0.462703	C	G	FALSE	12	93	32.828	37.75	0.0903613	0	101	35.1386	0	0	0	0	43	2.7907	0	0	0	0	0.61253	0.61253	0	12	12	12	2R	15569181
Zasp52	2R:15763673	CDS	TC	T	T	0.186047	1	0.540662	Silent	FBgn0265991	-1	No	-	Z band alternatively spliced PDZ-motif protein 52 (Zasp52) encodes a member of the Zasp protein family. It is a scaffold protein that binds the product of Actn and localizes to muscle attachment sites and Z-discs in muscle cells, as well as localizing cortically in non-muscle cells. It plays a role in muscle development, especially in myofibril assembly.	TCSKCAGKIK	2.84941	2.37525	0.780667	5.5222	5.58088	A	G	FALSE	1	104	8.07692	43	0	1	100	7.09	31	0	0	11	32	30.7188	30.2727	0.048532	0.061114	0.0211131	-0.813953	-30.0867	-29.2727	0	2	-10	2R	15763673
tun	2R:15848751	FivePrimeUTR	TA	-	-	0.861315	0.717093	0	-	FBgn0034046	1	No	-	Mediates the side-chain deamidation of N-terminal glutamine residues to glutamate, an important step in N-end rule pathway of protein degradation. Conversion of the resulting N-terminal glutamine to glutamate renders the protein susceptible to arginylation, polyubiquitination and degradation as specified by the N-end rule. Does not act on substrates with internal or C-terminal glutamine and does …		2.16697	3.40061	0.15337	0.768101	0.80403	T	A	FALSE	6	99	7.34343	35.1667	0.110555	19	82	8.12195	40.7895	0.0816312	0.373265	0	43	2.76744	0	0	0	0	0.144222	0.861315	0.717093	-13	25	6	2R	15848751
Diap2	2R:15932335	ThreePrimeUTR	GA	-	-	0.820919	0.739583	0	-	FBgn0015247	-1	No	-	Death-associated inhibitor of apoptosis 2 (Diap2) encodes a protein with ubiquitin E3-ligase activity that functions in the Imd pathway by conjugating the product of imd with K63-polyubiquitin chains.		2.21743	2.14379	0.569937	1.94321	1.78065	C	T	FALSE	11	94	10.3298	49.4545	0.0720668	3	98	9.79592	23.3333	0.260417	0.669608	0	43	4.55814	0	0	0	0	0.0813361	0.820919	0.739583	8	14	11	2R	15932335
Diap2	2R:15932794	CDS	TC	C	C	0.912038	0.927475	0.636364	Silent	FBgn0015247	-1	No	-	Death-associated inhibitor of apoptosis 2 (Diap2) encodes a protein with ubiquitin E3-ligase activity that functions in the Imd pathway by conjugating the product of imd with K63-polyubiquitin chains.	CGHLATCNQC	2.21743	2.14379	0.569937	1.94321	1.78065	A	G	FALSE	16	89	8.23596	54.75	0.0550709	17	84	6.79762	46.2941	0.0495119	0.835861	2	41	3.80488	12.5	0.363636	0.159371	0.114467	-0.0154366	-11.588	-11.5725	-1	33	14	2R	15932794
bug	2R:15935142	CDS	CA	P	T	0.760462	0.904995	0	Missense	FBgn0034050	1	No	-	Predicted to be involved in cilium assembly. Predicted to be active in cilium. Is expressed in adult head. Human ortholog(s) of this gene implicated in Meckel syndrome. Orthologous to human TXNDC15 (thioredoxin domain containing 15).	PDDEHIMHLN	1.45112	2.51366	0.00831639	1.71608	1.56393	C	A	FALSE	3	102	8.83333	33	0.173094	11	90	12.3222	25.5455	0.0505541	0.279639	0	43	3.37209	0	0	0	0	-0.144534	0.760462	0.904995	-8	14	3	2R	15935142
bug	2R:15935315	CDS	CA	A	A	0.810714	0.913794	0	Silent	FBgn0034050	1	No	-	Predicted to be involved in cilium assembly. Predicted to be active in cilium. Is expressed in adult head. Human ortholog(s) of this gene implicated in Meckel syndrome. Orthologous to human TXNDC15 (thioredoxin domain containing 15).	ATKRHEPGNC	1.45112	2.51366	0.00831639	1.71608	1.56393	C	A	FALSE	4	101	9.65347	38.5	0.145613	12	89	14.3146	24.8333	0.044111	0.366006	0	43	4.02326	0	0	0	0	-0.103079	0.810714	0.913794	-8	16	4	2R	15935315
bug	2R:15935324	CDS	CT	R	R	0.757311	0.907116	0	Silent	FBgn0034050	1	No	-	Predicted to be involved in cilium assembly. Predicted to be active in cilium. Is expressed in adult head. Human ortholog(s) of this gene implicated in Meckel syndrome. Orthologous to human TXNDC15 (thioredoxin domain containing 15).	RHEPGNCVLV	1.45112	2.51366	0.00831639	1.71608	1.56393	C	T	FALSE	5	100	9.54	34	0.12397	13	88	13.6818	26	0.0415526	0.153236	0	43	4	0	0	0	0	-0.149805	0.757311	0.907116	-8	18	5	2R	15935324
Mlf	2R:15939086	CDS	CA	G	G	0.61744	0	0	Silent	FBgn0034051	-1	No	Myeloid_leukemia_factor	interacts with various factors involved in transcriptional regulation, regulates cell proliferation during eye morphogenesis, Lozenge activity during hematopoetic development and assembly of the COP9 signalosome complex	GLFGMPMMPN	4.90198	5.10387	0.4882	1.76384	1.83569	G	T	FALSE	11	94	26.4894	41.8182	0.0968515	0	101	39.3663	0	0	0	0	43	3.18605	0	0	0	0	0.61744	0.61744	0	11	11	11	2R	15939086
CG8314	2R:15989769	ThreePrimeUTR	GT	-	-	0.755496	0.744729	0.522727	-	FBgn0034057	-1	No	-	Predicted to enable protein-cysteine S-palmitoyltransferase activity. Predicted to be involved in peptidyl-L-cysteine S-palmitoylation and protein targeting to membrane. Located in Golgi apparatus. Is expressed in adult head; embryonic/larval central nervous system; and organism. Orthologous to several human genes including ZDHHC3 (zinc finger DHHC-type palmitoyltransferase 3).		3.37659	3.91756	0.729489	2.94954	2.98204	C	A	FALSE	15	90	27.0333	34.8	0.0690826	25	76	24.8289	51.96	0.0619353	0.911566	2	41	10.8537	16.5	0.0681818	0.252253	0.329907	0.0107669	-15.7445	-15.7553	-10	40	13	2R	15989769
CG8314	2R:15989921	ThreePrimeUTR	TG	-	-	0.741065	0.733696	0	-	FBgn0034057	-1	No	-	Predicted to enable protein-cysteine S-palmitoyltransferase activity. Predicted to be involved in peptidyl-L-cysteine S-palmitoylation and protein targeting to membrane. Located in Golgi apparatus. Is expressed in adult head; embryonic/larval central nervous system; and organism. Orthologous to several human genes including ZDHHC3 (zinc finger DHHC-type palmitoyltransferase 3).		3.37659	3.91756	0.729489	2.94954	2.98204	A	C	FALSE	11	94	24.7234	40.9091	0.0889923	5	96	31.9167	41.2	0.138322	0.96423	0	43	11.186	0	0	0	0	0.00736916	0.741065	0.733696	6	16	11	2R	15989921
Pex11ab	2R:15991737	CDS	CT	I	I	0.563047	0.832539	0.675	Silent	FBgn0034058	-1	No	PEX11	Involved in peroxisome organization. Located in peroxisome. Is expressed in adult head and organism. Human ortholog(s) of this gene implicated in peroxisomal biogenesis disorder. Orthologous to several human genes including PEX11A (peroxisomal biogenesis factor 11 alpha).	IPASINSPED	1.51269	2.45289	0.184934	2.00653	2.11944	G	A	FALSE	4	101	17.3366	61.75	0.1472	15	86	16.9651	55.0667	0.0697901	0.0993308	2	41	8.09756	16	0.075	0.645649	0.43785	-0.269492	-15.437	-15.1675	-11	19	2	2R	15991737
CG8320	2R:15993193	CDS	TC	V	V	0.686392	0.752966	0.45737	Silent	FBgn0034059	1	No	SND2/TMEM208	Predicted to be involved in vacuolar protein processing. Is expressed in several structures, including adult head; adult heart; and gut section. Orthologous to human TMEM208 (transmembrane protein 208).	VKDLIILTSG	3.3196	3.11592	0.958839	1.9464	2.06793	T	C	FALSE	32	73	27.4247	59.8125	0.0527029	34	67	21.0149	70.5294	0.0505407	0.365168	6	37	7.91892	13.3333	0.080641	0.0805335	0.0239568	-0.0665741	-12.6469	-12.5804	-2	66	26	2R	15993193
ATPCL	2R:15994473	CDS	CA	G	G	0.834379	1	0.518116	Silent	FBgn0020236	-1	No	Citrate_synthase	ATP citrate lyase (ATPCL) encodes a protein involved in glucose homeostasis.	GSFTSEEAQE	3.02082	2.76401	0.392183	2.11232	1.97778	G	T	FALSE	11	94	23.9255	56.4545	0.076328	3	98	20.1939	40	0	0.292775	3	40	12.4	17	0.128967	0.0743486	0.0201826	-0.165621	-16.1656	-16	8	14	8	2R	15994473
Ufc1	2R:16007156	CDS	GC	T	T	0.593266	0.710797	0.59111	Silent	FBgn0034061	-1	No	Ufc1	E2-like enzyme which forms an intermediate with UFM1 via a thioester linkage (By similarity). As part of Ufm1 cascade, might play a role in the development of the neuromuscular junctions (PubMed:26872069). (UniProtKB:Q7K1Z5)	TDHFKPLWAR	3.89671	4.76406	0.198863	4.33244	4.42744	C	G	FALSE	14	91	31.8571	67.7857	0.0785022	6	95	53.0737	43	0.135677	0.439883	6	37	17.5135	14.3333	0.0406991	0.986371	0.417894	-0.117532	-13.7401	-13.6225	8	20	8	2R	16007156
Ufc1	2R:16007177	CDS	TC	R	R	0.812317	0.721971	0.43733	Silent	FBgn0034061	-1	No	Ufc1	E2-like enzyme which forms an intermediate with UFM1 via a thioester linkage (By similarity). As part of Ufm1 cascade, might play a role in the development of the neuromuscular junctions (PubMed:26872069). (UniProtKB:Q7K1Z5)	RGGKICLTDH	3.89671	4.76406	0.198863	4.33244	4.42744	A	G	FALSE	24	81	33.9877	41.0833	0.0519659	42	59	29.4576	57.1667	0.0458267	0.215889	8	35	14.3429	16.875	0.0370281	0.000362966	0.010587	0.0903457	-16.0627	-16.153	-18	66	16	2R	16007177
Ufc1	2R:16007213	CDS	GA	M	L	0.775262	0.739198	0.534511	Missense	FBgn0034061	-1	No	Ufc1	E2-like enzyme which forms an intermediate with UFM1 via a thioester linkage (By similarity). As part of Ufm1 cascade, might play a role in the development of the neuromuscular junctions (PubMed:26872069). (UniProtKB:Q7K1Z5)	MPELDGKTAK	3.89671	4.76406	0.198863	4.33244	4.42744	C	T	FALSE	22	83	34.4458	45.4545	0.056927	44	57	30.1228	58.25	0.0438264	0.627379	11	32	14.7812	16.6364	0.0423137	0.00896067	0.0280573	0.0360639	-15.8611	-15.8972	-22	66	11	2R	16007213
Ufc1	2R:16007582	FivePrimeUTR	TC	-	-	0.790778	0.766819	0.445671	-	FBgn0034061	-1	No	-	E2-like enzyme which forms an intermediate with UFM1 via a thioester linkage (By similarity). As part of Ufm1 cascade, might play a role in the development of the neuromuscular junctions (PubMed:26872069). (UniProtKB:Q7K1Z5)		3.89671	4.76406	0.198863	4.33244	4.42744	A	G	FALSE	22	83	29.9398	43.5455	0.0632805	32	69	29	60.7188	0.0534706	0.774368	4	39	14.0769	24.5	0.0327166	0.0318617	0.0439857	0.0239586	-23.7092	-23.7332	-10	54	18	2R	16007582
Prosbeta1	2R:16014304	CDS	TC	L	L	0.567354	0.658715	0.504027	Silent	FBgn0010590	-1	No	Proteasome_sua/b	Predicted to enable endopeptidase activity. Predicted to be involved in proteasome-mediated ubiquitin-dependent protein catabolic process. Part of proteasome core complex. Is expressed in adult head; adult heart; germline cell; organism; and primordial germ cell. Human ortholog(s) of this gene implicated in autoimmune disease (multiple); lymphoma; and renal cell carcinoma. Orthologous to several …	LAGIIVAGWD	7.74825	8.59438	0.615658	8.00597	7.82072	A	G	FALSE	25	80	172.075	254.56	0.0360306	11	90	254.322	123.182	0.079438	0.233442	12	31	254.742	249.25	0.0119945	0.240404	0.0573424	-0.0913615	-248.683	-248.591	14	36	13	2R	16014304
casp	2R:16026529	CDS	CG	L	M	0.688634	0.706826	0	Missense	FBgn0034068	-1	No	-	caspar (casp) encodes a protein that inhibits the immune deficiency pathway, but not the Toll pathway, by blocking cleavage and nuclear translocation of the product of Rel.	LSHRFAVRST	3.00155	4.1279	0.0395021	1.84821	1.65856	G	C	FALSE	21	84	16.5952	27.381	0.0688458	21	80	18.775	39.7143	0.0578794	0.840744	0	43	9.83721	0	0	0	0	-0.0181913	0.688634	0.706826	0	42	21	2R	16026529
CG8405	2R:16047756	FivePrimeUTR	CT	-	-	0.779083	0.697105	0	-	FBgn0034071	1	No	-	Involved in wing disc dorsal/ventral pattern formation. Predicted to be active in endoplasmic reticulum. Is expressed in adult head and organism. Orthologous to human TMEM259 (transmembrane protein 259).		2.53302	2.65448	0.692047	1.04381	0.98824	C	T	FALSE	18	87	22.3103	26.3889	0.0645359	23	78	20.3333	24.8261	0.0628748	0.374188	0	43	10.5814	0	0	0	0	0.0819775	0.779083	0.697105	-5	41	18	2R	16047756
CG8405	2R:16048178	CDS	CT	M	M	0.679824	0.759928	0.400483	Silent	FBgn0034071	1	No	Membralin	Involved in wing disc dorsal/ventral pattern formation. Predicted to be active in endoplasmic reticulum. Is expressed in adult head and organism. Orthologous to human TMEM259 (transmembrane protein 259).	MFFFTLIYVH	2.53302	2.65448	0.692047	1.04381	0.98824	C	T	FALSE	31	74	25.7027	37.5161	0.0558037	41	60	21.3833	34.4146	0.0412164	0.241484	3	40	10.75	18	0.0695065	0.13632	0.0251919	-0.0801044	-17.3202	-17.2401	-10	72	28	2R	16048178
CG8405	2R:16048589	CDS	AC	T	T	0.713877	0.760314	0.705882	Silent	FBgn0034071	1	No	Membralin	Involved in wing disc dorsal/ventral pattern formation. Predicted to be active in endoplasmic reticulum. Is expressed in adult head and organism. Orthologous to human TMEM259 (transmembrane protein 259).	TFAYSNESLY	2.53302	2.65448	0.692047	1.04381	0.98824	A	C	FALSE	16	89	24.573	23.9375	0.0829174	20	81	20.7037	21.1	0.0527468	0.626831	1	42	10.0952	17	0	0.981653	0.824236	-0.0464379	-16.2861	-16.2397	-4	36	15	2R	16048589
Dg	2R:16081388	ThreePrimeUTR	CT	-	-	0.889238	0.778081	0	-	FBgn0034072	-1	No	-	Dystroglycan (Dg) encodes a major non-integrin extracellular matrix (ECM) receptor that connects the ECM to the actin cytoskeleton. It regulates animal survival and temperature preference, muscle integrity, myotendinous and neuromuscular junction formation and function, nervous system development, axon pathfinding, rhabdomere differentiation, neuronal stem cell division and epithelial polarity.		2.78357	3.28406	0.754072	1.38216	1.29216	G	A	FALSE	9	96	22.1562	42.5556	0.0754564	22	79	21.962	42.3182	0.0659637	0.338873	0	43	8.97674	0	0	0	0	0.111158	0.889238	0.778081	-13	31	9	2R	16081388
Dg	2R:16081503	ThreePrimeUTR	TC	-	-	0.965	0.816664	0	-	FBgn0034072	-1	No	-	Dystroglycan (Dg) encodes a major non-integrin extracellular matrix (ECM) receptor that connects the ECM to the actin cytoskeleton. It regulates animal survival and temperature preference, muscle integrity, myotendinous and neuromuscular junction formation and function, nervous system development, axon pathfinding, rhabdomere differentiation, neuronal stem cell division and epithelial polarity.		2.78357	3.28406	0.754072	1.38216	1.29216	A	G	FALSE	8	97	20.5979	41.125	0.035	17	84	20.5833	49.7059	0.0661065	0.1525	0	43	8.95349	0	0	0	0	0.148336	0.965	0.816664	-9	25	8	2R	16081503
Dg	2R:16081583	ThreePrimeUTR	TC	-	-	0.952941	0.763188	0	-	FBgn0034072	-1	No	-	Dystroglycan (Dg) encodes a major non-integrin extracellular matrix (ECM) receptor that connects the ECM to the actin cytoskeleton. It regulates animal survival and temperature preference, muscle integrity, myotendinous and neuromuscular junction formation and function, nervous system development, axon pathfinding, rhabdomere differentiation, neuronal stem cell division and epithelial polarity.		2.78357	3.28406	0.754072	1.38216	1.29216	A	G	FALSE	5	100	20.37	14.8	0.0470588	11	90	18.9778	39.5455	0.105497	0.262023	0	43	9.02326	0	0	0	0	0.189753	0.952941	0.763188	-6	16	5	2R	16081583
Dg	2R:16081592	ThreePrimeUTR	GT	-	-	0.966667	0.792779	0	-	FBgn0034072	-1	No	-	Dystroglycan (Dg) encodes a major non-integrin extracellular matrix (ECM) receptor that connects the ECM to the actin cytoskeleton. It regulates animal survival and temperature preference, muscle integrity, myotendinous and neuromuscular junction formation and function, nervous system development, axon pathfinding, rhabdomere differentiation, neuronal stem cell division and epithelial polarity.		2.78357	3.28406	0.754072	1.38216	1.29216	C	A	FALSE	5	100	20.53	17	0.0333333	12	89	18.5618	41.8333	0.0946042	0.266855	0	43	8.97674	0	0	0	0	0.173888	0.966667	0.792779	-7	17	5	2R	16081592
Dg	2R:16081906	ThreePrimeUTR	GC	-	-	0.748004	0.800288	0.566667	-	FBgn0034072	-1	No	-	Dystroglycan (Dg) encodes a major non-integrin extracellular matrix (ECM) receptor that connects the ECM to the actin cytoskeleton. It regulates animal survival and temperature preference, muscle integrity, myotendinous and neuromuscular junction formation and function, nervous system development, axon pathfinding, rhabdomere differentiation, neuronal stem cell division and epithelial polarity.		2.78357	3.28406	0.754072	1.38216	1.29216	C	G	FALSE	9	96	27.6562	29.3333	0.0997966	17	84	22.869	33.1176	0.069524	0.666802	2	41	11.5122	15	0.1	0.438518	0.28023	-0.0522839	-14.252	-14.1997	-8	26	7	2R	16081906
Dg	2R:16081964	ThreePrimeUTR	GT	-	-	0.746574	0.800924	0	-	FBgn0034072	-1	No	-	Dystroglycan (Dg) encodes a major non-integrin extracellular matrix (ECM) receptor that connects the ECM to the actin cytoskeleton. It regulates animal survival and temperature preference, muscle integrity, myotendinous and neuromuscular junction formation and function, nervous system development, axon pathfinding, rhabdomere differentiation, neuronal stem cell division and epithelial polarity.		2.78357	3.28406	0.754072	1.38216	1.29216	C	A	FALSE	9	96	25.7292	29.1111	0.10027	15	86	19.7558	31.8	0.0821958	0.683575	0	43	11.9535	0	0	0	0	-0.05435	0.746574	0.800924	-6	24	9	2R	16081964
Dg	2R:16081965	ThreePrimeUTR	GT	-	-	0.763913	0.800924	0	-	FBgn0034072	-1	No	-	Dystroglycan (Dg) encodes a major non-integrin extracellular matrix (ECM) receptor that connects the ECM to the actin cytoskeleton. It regulates animal survival and temperature preference, muscle integrity, myotendinous and neuromuscular junction formation and function, nervous system development, axon pathfinding, rhabdomere differentiation, neuronal stem cell division and epithelial polarity.		2.78357	3.28406	0.754072	1.38216	1.29216	C	A	FALSE	9	96	25.7292	28.8889	0.0944656	15	86	19.8953	31.9333	0.0821958	0.776968	0	43	12.1163	0	0	0	0	-0.0370117	0.763913	0.800924	-6	24	9	2R	16081965
Dg	2R:16088937	CDS	GC	M	L	0.863636	0.772588	0.285714	Missense	FBgn0034072	-1	No	-	Dystroglycan (Dg) encodes a major non-integrin extracellular matrix (ECM) receptor that connects the ECM to the actin cytoskeleton. It regulates animal survival and temperature preference, muscle integrity, myotendinous and neuromuscular junction formation and function, nervous system development, axon pathfinding, rhabdomere differentiation, neuronal stem cell division and epithelial polarity.	MNRRLGRASF	2.78357	3.28406	0.754072	1.38216	1.29216	C	G	FALSE	5	100	18.33	60.4	0.132608	12	89	17.6966	56.5833	0.0977118	0.609439	1	42	9.61905	14	0	0.149825	0.194401	0.0910488	-13.1364	-13.2274	-7	17	4	2R	16088937
Dg	2R:16088949	CDS	TC	N	N	0.759167	0.760356	0.285714	Silent	FBgn0034072	-1	No	-	Dystroglycan (Dg) encodes a major non-integrin extracellular matrix (ECM) receptor that connects the ECM to the actin cytoskeleton. It regulates animal survival and temperature preference, muscle integrity, myotendinous and neuromuscular junction formation and function, nervous system development, axon pathfinding, rhabdomere differentiation, neuronal stem cell division and epithelial polarity.	NIETLNRRLG	2.78357	3.28406	0.754072	1.38216	1.29216	A	G	FALSE	6	99	17.6061	62	0.152515	12	89	17.5618	55.4167	0.0979842	0.99467	1	42	9.47619	14	0	0.293515	0.206168	-0.00118895	-13.2408	-13.2396	-6	18	5	2R	16088949
Dg	2R:16089645	CDS	TC	M	M	1	0.800226	0	Silent	FBgn0034072	-1	No	-	Dystroglycan (Dg) encodes a major non-integrin extracellular matrix (ECM) receptor that connects the ECM to the actin cytoskeleton. It regulates animal survival and temperature preference, muscle integrity, myotendinous and neuromuscular junction formation and function, nervous system development, axon pathfinding, rhabdomere differentiation, neuronal stem cell division and epithelial polarity.	MSLFLLLDFV	2.78357	3.28406	0.754072	1.38216	1.29216	A	G	FALSE	4	101	19.0198	50.25	0	13	88	18.3636	32.6923	0.0842578	0.217992	0	43	9.93023	0	0	0	0	0.199774	1	0.800226	-9	17	4	2R	16089645
Dg	2R:16089649	CDS	GC	A	A	1	0.810646	0	Silent	FBgn0034072	-1	No	-	Dystroglycan (Dg) encodes a major non-integrin extracellular matrix (ECM) receptor that connects the ECM to the actin cytoskeleton. It regulates animal survival and temperature preference, muscle integrity, myotendinous and neuromuscular junction formation and function, nervous system development, axon pathfinding, rhabdomere differentiation, neuronal stem cell division and epithelial polarity.	ASLSLFLLLD	2.78357	3.28406	0.754072	1.38216	1.29216	C	G	FALSE	4	101	19.3168	52.5	0	14	87	18.6552	31.1429	0.0804767	0.236289	0	43	9.95349	0	0	0	0	0.189354	1	0.810646	-10	18	4	2R	16089649
Dg	2R:16098312	FivePrimeUTR	GT	-	-	0.817515	0.85474	0.533333	-	FBgn0034072	-1	No	-	Dystroglycan (Dg) encodes a major non-integrin extracellular matrix (ECM) receptor that connects the ECM to the actin cytoskeleton. It regulates animal survival and temperature preference, muscle integrity, myotendinous and neuromuscular junction formation and function, nervous system development, axon pathfinding, rhabdomere differentiation, neuronal stem cell division and epithelial polarity.		2.78357	3.28406	0.754072	1.38216	1.29216	C	A	FALSE	11	94	26.6915	37.8182	0.0874054	16	85	20.6941	29.6875	0.0457212	0.685152	1	42	10.1429	15	0	0.370067	0.10882	-0.0372255	-14.1825	-14.1453	-5	27	10	2R	16098312
Dg	2R:16098420	FivePrimeUTR	AT	-	-	0.669438	0.699763	0	-	FBgn0034072	-1	No	-	Dystroglycan (Dg) encodes a major non-integrin extracellular matrix (ECM) receptor that connects the ECM to the actin cytoskeleton. It regulates animal survival and temperature preference, muscle integrity, myotendinous and neuromuscular junction formation and function, nervous system development, axon pathfinding, rhabdomere differentiation, neuronal stem cell division and epithelial polarity.		2.78357	3.28406	0.754072	1.38216	1.29216	T	A	FALSE	11	94	23.266	62.0909	0.0906769	6	95	25.1368	17.5	0.129699	0.848049	0	43	10.8837	0	0	0	0	-0.0303248	0.669438	0.699763	5	17	11	2R	16098420
Rho1	2R:16102790	FivePrimeUTR	GA	-	-	0.387948	0.470581	0.205823	-	FBgn0014020	1	No	-	Rho1 (Rho1) encodes a GTPase signaling protein that acts as a molecular switch and functions as key regulator of the actin cytoskeleton. It plays a central role in diverse biological processes including actin cytoskeleton organization, microtubule dynamics, mophogenesis, border cell migration, cytokinesis, and wound repair.		6.72837	7.15367	0.666915	6.19756	5.79971	G	A	FALSE	12	93	66.5699	62.6667	0.0690387	12	89	69.191	61.6667	0.085594	0.460358	3	40	26.1	23	0.0173691	0.222679	0.156887	-0.0826322	-22.6121	-22.5294	0	24	9	2R	16102790
Ric	2R:16107611	ThreePrimeUTR	TA	-	-	0.625412	0.586745	0	-	FBgn0265605	-1	No	-	Ras-related protein interacting with calmodulin (Ric) encodes a Ras-like GTPase that influences p38 signaling. It functions to promote tolerance to a variety of stresses.		4.76805	4.74994	0.98195	2.18522	1.83667	A	T	FALSE	23	82	22.6951	30.7391	0.0619493	31	70	14.3571	27.0968	0.0448426	0.606007	0	43	8.88372	0	0	0	0	0.038667	0.625412	0.586745	-8	54	23	2R	16107611
Ric	2R:16107817	ThreePrimeUTR	GA	-	-	0.585017	0.387265	0.266667	-	FBgn0265605	-1	No	-	Ras-related protein interacting with calmodulin (Ric) encodes a Ras-like GTPase that influences p38 signaling. It functions to promote tolerance to a variety of stresses.		4.76805	4.74994	0.98195	2.18522	1.83667	C	T	FALSE	17	88	41.375	37.1765	0.0781815	7	94	36.0106	37.7143	0.0781201	0.150164	1	42	9.71429	15	0	0.351454	0.604885	0.197751	-14.415	-14.6127	10	24	16	2R	16107817
Ric	2R:16107883	ThreePrimeUTR	AC	-	-	0.611799	0.570204	0.363636	-	FBgn0265605	-1	No	-	Ras-related protein interacting with calmodulin (Ric) encodes a Ras-like GTPase that influences p38 signaling. It functions to promote tolerance to a variety of stresses.		4.76805	4.74994	0.98195	2.18522	1.83667	T	G	FALSE	17	88	41.3409	45.4118	0.0701811	6	95	41.5158	43.1667	0.0404445	0.736773	1	42	9.85714	11	0	0.416859	0.111429	0.041595	-10.3882	-10.4298	11	23	16	2R	16107883
Ric	2R:16107973	ThreePrimeUTR	CT	-	-	0.629504	0.476448	0	-	FBgn0265605	-1	No	-	Ras-related protein interacting with calmodulin (Ric) encodes a Ras-like GTPase that influences p38 signaling. It functions to promote tolerance to a variety of stresses.		4.76805	4.74994	0.98195	2.18522	1.83667	G	A	FALSE	14	91	39.1209	41.7857	0.0778427	5	96	37.7188	38.8	0.0824191	0.291632	0	43	9.34884	0	0	0	0	0.153056	0.629504	0.476448	9	19	14	2R	16107973
Ric	2R:16108538	ThreePrimeUTR	AT	-	-	0.565267	0.504146	0	-	FBgn0265605	-1	No	-	Ras-related protein interacting with calmodulin (Ric) encodes a Ras-like GTPase that influences p38 signaling. It functions to promote tolerance to a variety of stresses.		4.76805	4.74994	0.98195	2.18522	1.83667	T	A	FALSE	16	89	36.0674	47.125	0.0749477	8	93	37.3548	37.5	0.084677	0.621676	0	43	8.74419	0	0	0	0	0.0611209	0.565267	0.504146	8	24	16	2R	16108538
Ric	2R:16108576	ThreePrimeUTR	TC	-	-	0.575425	0.421757	0	-	FBgn0265605	-1	No	-	Ras-related protein interacting with calmodulin (Ric) encodes a Ras-like GTPase that influences p38 signaling. It functions to promote tolerance to a variety of stresses.		4.76805	4.74994	0.98195	2.18522	1.83667	A	G	FALSE	16	89	30.5955	34.75	0.0726805	6	95	29.8842	44.1667	0.0723512	0.243154	0	43	8.25581	0	0	0	0	0.153668	0.575425	0.421757	10	22	16	2R	16108576
Ric	2R:16108823	CDS	AC	R	R	0.593353	0.654932	0.454545	Silent	FBgn0265605	-1	No	-	Ras-related protein interacting with calmodulin (Ric) encodes a Ras-like GTPase that influences p38 signaling. It functions to promote tolerance to a variety of stresses.	RSRWWRIRSI	4.76805	4.74994	0.98195	2.18522	1.83667	T	G	FALSE	17	88	31.3636	39.1765	0.0695966	5	96	32.0104	48.8	0.120188	0.673878	1	42	7.80952	11	0	0.644627	0.533447	-0.0615786	-10.4066	-10.3451	12	22	16	2R	16108823
Ric	2R:16108853	CDS	CT	S	S	0.592081	0.55994	0	Silent	FBgn0265605	-1	No	-	Ras-related protein interacting with calmodulin (Ric) encodes a Ras-like GTPase that influences p38 signaling. It functions to promote tolerance to a variety of stresses.	SNSEKIHTGR	4.76805	4.74994	0.98195	2.18522	1.83667	G	A	FALSE	16	89	29.573	37.0625	0.0711398	6	95	30.1895	46.3333	0.123375	0.818692	0	43	8.4186	0	0	0	0	0.0321416	0.592081	0.55994	10	22	16	2R	16108853
Ric	2R:16108961	CDS	GA	P	P	0.55245	0.663392	0	Silent	FBgn0265605	-1	No	Small_GTPase	Ras-related protein interacting with calmodulin (Ric) encodes a Ras-like GTPase that influences p38 signaling. It functions to promote tolerance to a variety of stresses.	PFFETSAALR	4.76805	4.74994	0.98195	2.18522	1.83667	C	T	FALSE	13	92	28.087	37.7692	0.0729502	3	98	31.2551	39.3333	0.11351	0.507401	0	43	8.23256	0	0	0	0	-0.110942	0.55245	0.663392	10	16	13	2R	16108961
Ric	2R:16109069	CDS	GC	M	L	0.639965	0.648915	0	Missense	FBgn0265605	-1	No	Small_GTPase	Ras-related protein interacting with calmodulin (Ric) encodes a Ras-like GTPase that influences p38 signaling. It functions to promote tolerance to a variety of stresses.	MSEDIPLVLI	4.76805	4.74994	0.98195	2.18522	1.83667	C	G	FALSE	24	81	25.6667	36.7083	0.0629494	37	64	19.1719	42.1351	0.0445443	0.905409	0	43	8.48837	0	0	0	0	-0.00894988	0.639965	0.648915	-13	61	24	2R	16109069
Ric	2R:16109661	CDS	TC	I	I	0.57318	0.645813	0	Silent	FBgn0265605	-1	No	Small_GTPase	Ras-related protein interacting with calmodulin (Ric) encodes a Ras-like GTPase that influences p38 signaling. It functions to promote tolerance to a variety of stresses.	IVILGDGGVG	4.76805	4.74994	0.98195	2.18522	1.83667	A	G	FALSE	23	82	26.122	29.1739	0.0718489	38	63	18.5079	33.6579	0.0442713	0.365743	0	43	8.30233	0	0	0	0	-0.0726335	0.57318	0.645813	-15	61	23	2R	16109661
Ric	2R:16109667	CDS	TC	Y	Y	0.555168	0.649586	0	Silent	FBgn0265605	-1	No	-	Ras-related protein interacting with calmodulin (Ric) encodes a Ras-like GTPase that influences p38 signaling. It functions to promote tolerance to a variety of stresses.	YKIVILGDGG	4.76805	4.74994	0.98195	2.18522	1.83667	A	G	FALSE	22	83	25.6867	32	0.0716887	37	64	18.4375	36.1081	0.0443454	0.240992	0	43	7.97674	0	0	0	0	-0.0944178	0.555168	0.649586	-15	59	22	2R	16109667
Asph	2R:16111996	CDS	GA	M	L	0.571429	0.992188	0.47041	Missense	FBgn0034075	1	No	-	Aspartyl beta-hydroxylase (Asph) may be involved in peptidyl-amino acid modification based on orthology. It might be involved in neurogenesis since lack of Asph function enhances the expanded htt-fragment-induced eye phenotype.	MSESRFSKVF	0.603309	1.00843	0.513152	4.44674	3.44778	G	A	FALSE	1	104	12.125	21	0	4	97	9.73196	55	0.0078125	0.000156858	11	32	10.6562	35.1818	0.0196563	0.16874	9.23289e-10	-0.420759	-34.6104	-34.1896	-3	5	-10	2R	16111996
Asph	2R:16116779	ThreePrimeUTR	GT	-	-	0.907895	0.725903	0.514804	-	FBgn0034075	1	No	-	Aspartyl beta-hydroxylase (Asph) may be involved in peptidyl-amino acid modification based on orthology. It might be involved in neurogenesis since lack of Asph function enhances the expanded htt-fragment-induced eye phenotype.		0.603309	1.00843	0.513152	4.44674	3.44778	G	T	FALSE	2	103	12.2427	24.5	0.0921053	9	92	12.4457	49.6667	0.108617	0.472212	18	25	20.72	49.3333	0.0292399	0.000493356	0.0214957	0.181992	-48.4254	-48.6074	-7	11	-16	2R	16116779
Got1	2R:16141839	ThreePrimeUTR	AT	-	-	0.532681	0.823529	0.333846	-	FBgn0001124	1	No	-	Glutamate oxaloacetate transaminase 1 (Got1) encodes an L-aspartate:2-oxoglutarate aminotransferase involved in glutamate biosynthesis.		4.46672	4.50823	0.923616	5.08115	5.69811	A	T	FALSE	13	92	46.1957	93.0769	0.0868237	4	97	52.1856	27.25	0.176471	0.134368	12	31	64.0968	51.6667	0.0308046	0.048046	0.000506225	-0.290848	-51.134	-50.8431	9	17	1	2R	16141839
Lis-1	2R:16178898	FivePrimeUTR	CG	-	-	0.594406	0.615571	0	-	FBgn0015754	1	No	-	Lissencephaly-1 (Lis-1) encodes a regulator of the cytoplasmic dynein-1 motor complex, binding to Dynein heavy chain and regulating dynein force production, microtubule affinity and velocity. It is involved in the transport of many of dynein's cargoes, including mRNPs, mitochondria and nuclei. The Lis-1 product is also a non-catalytic subunit of platelet-activating factor acetylhydrolase.		5.71834	6.47378	0.450267	2.80773	2.38484	C	G	FALSE	17	88	33.25	38.5294	0.0713676	7	94	33.6064	22.1429	0.0993554	0.870633	0	43	6.93023	0	0	0	0	-0.0211652	0.594406	0.615571	10	24	17	2R	16178898
Lis-1	2R:16178923	FivePrimeUTR	AT	-	-	0.590052	0.522857	0	-	FBgn0015754	1	No	-	Lissencephaly-1 (Lis-1) encodes a regulator of the cytoplasmic dynein-1 motor complex, binding to Dynein heavy chain and regulating dynein force production, microtubule affinity and velocity. It is involved in the transport of many of dynein's cargoes, including mRNPs, mitochondria and nuclei. The Lis-1 product is also a non-catalytic subunit of platelet-activating factor acetylhydrolase.		5.71834	6.47378	0.450267	2.80773	2.38484	A	T	FALSE	17	88	28.7159	32.5882	0.0725004	5	96	30.375	18.2	0.161093	0.676717	0	43	6.62791	0	0	0	0	0.0671946	0.590052	0.522857	12	22	17	2R	16178923
Lis-1	2R:16182260	CDS	TC	F	F	0.570186	0.494504	0	Silent	FBgn0015754	1	No	-	Lissencephaly-1 (Lis-1) encodes a regulator of the cytoplasmic dynein-1 motor complex, binding to Dynein heavy chain and regulating dynein force production, microtubule affinity and velocity. It is involved in the transport of many of dynein's cargoes, including mRNPs, mitochondria and nuclei. The Lis-1 product is also a non-catalytic subunit of platelet-activating factor acetylhydrolase.	FGGLLEKKWT	5.71834	6.47378	0.450267	2.80773	2.38484	T	C	FALSE	20	85	32.9412	34.9	0.0691372	5	96	34.8229	27.4	0.109409	0.617472	0	43	6.37209	0	0	0	0	0.0756822	0.570186	0.494504	15	25	20	2R	16182260
Lis-1	2R:16182365	CDS	GC	G	G	0.615524	0.570235	0	Silent	FBgn0015754	1	No	-	Lissencephaly-1 (Lis-1) encodes a regulator of the cytoplasmic dynein-1 motor complex, binding to Dynein heavy chain and regulating dynein force production, microtubule affinity and velocity. It is involved in the transport of many of dynein's cargoes, including mRNPs, mitochondria and nuclei. The Lis-1 product is also a non-catalytic subunit of platelet-activating factor acetylhydrolase.	GAPTKNKRTP	5.71834	6.47378	0.450267	2.80773	2.38484	G	C	FALSE	18	87	31.5862	34.7222	0.0659962	5	96	33.6667	25.2	0.117172	0.749283	0	43	6.39535	0	0	0	0	0.0452882	0.615524	0.570235	13	23	18	2R	16182365
Lis-1	2R:16183749	ThreePrimeUTR	CT	-	-	0.534137	0.543202	0	-	FBgn0015754	1	No	-	Lissencephaly-1 (Lis-1) encodes a regulator of the cytoplasmic dynein-1 motor complex, binding to Dynein heavy chain and regulating dynein force production, microtubule affinity and velocity. It is involved in the transport of many of dynein's cargoes, including mRNPs, mitochondria and nuclei. The Lis-1 product is also a non-catalytic subunit of platelet-activating factor acetylhydrolase.		5.71834	6.47378	0.450267	2.80773	2.38484	C	T	FALSE	20	85	41.1294	42.75	0.059899	10	91	55.4396	41.1	0.0984351	0.934573	0	43	7.46512	0	0	0	0	-0.00906475	0.534137	0.543202	10	30	20	2R	16183749
Lis-1	2R:16183950	ThreePrimeUTR	AT	-	-	0.504434	0.696254	0	-	FBgn0015754	1	No	-	Lissencephaly-1 (Lis-1) encodes a regulator of the cytoplasmic dynein-1 motor complex, binding to Dynein heavy chain and regulating dynein force production, microtubule affinity and velocity. It is involved in the transport of many of dynein's cargoes, including mRNPs, mitochondria and nuclei. The Lis-1 product is also a non-catalytic subunit of platelet-activating factor acetylhydrolase.		5.71834	6.47378	0.450267	2.80773	2.38484	A	T	FALSE	16	89	42.2472	53.5	0.0689262	6	95	59.8737	57.6667	0.130056	0.178002	0	43	6.93023	0	0	0	0	-0.19182	0.504434	0.696254	10	22	16	2R	16183950
Lis-1	2R:16184021	ThreePrimeUTR	GA	-	-	0.491184	0.634367	0	-	FBgn0015754	1	No	-	Lissencephaly-1 (Lis-1) encodes a regulator of the cytoplasmic dynein-1 motor complex, binding to Dynein heavy chain and regulating dynein force production, microtubule affinity and velocity. It is involved in the transport of many of dynein's cargoes, including mRNPs, mitochondria and nuclei. The Lis-1 product is also a non-catalytic subunit of platelet-activating factor acetylhydrolase.		5.71834	6.47378	0.450267	2.80773	2.38484	G	A	FALSE	18	87	34.6782	40.9444	0.0626952	9	92	46.5217	43.1111	0.108518	0.232145	0	43	6.44186	0	0	0	0	-0.143183	0.491184	0.634367	9	27	18	2R	16184021
Lis-1	2R:16184668	ThreePrimeUTR	AT	-	-	0.528647	0.610708	0	-	FBgn0015754	1	No	-	Lissencephaly-1 (Lis-1) encodes a regulator of the cytoplasmic dynein-1 motor complex, binding to Dynein heavy chain and regulating dynein force production, microtubule affinity and velocity. It is involved in the transport of many of dynein's cargoes, including mRNPs, mitochondria and nuclei. The Lis-1 product is also a non-catalytic subunit of platelet-activating factor acetylhydrolase.		5.71834	6.47378	0.450267	2.80773	2.38484	A	T	FALSE	19	86	45.3953	57.9474	0.0626001	10	91	60.1538	49.3	0.0851925	0.446217	0	43	5.95349	0	0	0	0	-0.0820614	0.528647	0.610708	9	29	19	2R	16184668
CG42837	2R:16198143	ThreePrimeUTR	AC	-	-	0.644961	0.588235	0.496131	-	FBgn0262026	1	No	-	Involved in retrograde axonal transport. Is expressed in several structures, including embryonic/larval muscle system; gut section; and posterior midgut primordium.		2.27932	2.35137	0.939676	3.27598	3.14269	A	C	FALSE	12	93	21.6129	36.4167	0.101305	2	99	20.9495	28.5	0.411765	0.846598	5	38	16.2632	22.6	0.0471664	0.374421	0.707436	0.0567254	-21.955	-22.0118	10	14	7	2R	16198143
Lipt1	2R:16198143	CDS	AC	I	I	0.644961	0.588235	0.496131	Silent	FBgn0265178	1	No	-	Predicted to enable lipoyltransferase activity. Predicted to be involved in protein lipoylation. Predicted to be active in mitochondrion. Is expressed in several structures, including embryonic/larval muscle system; gut section; and posterior midgut primordium. Orthologous to human LIPT1 (lipoyltransferase 1).	ITLARRNSGG	4.41442	4.17928	0.942686	5.06347	4.57005	A	C	FALSE	12	93	21.6129	36.4167	0.101305	2	99	20.9495	28.5	0.411765	0.846598	5	38	16.2632	22.6	0.0471664	0.374421	0.707436	0.0567254	-21.955	-22.0118	10	14	7	2R	16198143
RpLP2	2R:16586731	ThreePrimeUTR	CG	-	-	0.343692	0.153994	0.203966	-	FBgn0003274	1	No	-	Plays an important role in the elongation step of protein synthesis. (UniProtKB:P05389)		12.467	12.7236	8.06057e-09	12.2191	12.039	C	G	FALSE	6	99	211.242	32.5	0.0724468	11	90	192.533	68	0.0160068	0.00429756	8	35	141.371	62	0.0279556	0.0689008	0.116651	0.189698	-61.6563	-61.846	-5	17	-2	2R	16586731
eEF1beta	2R:16869128	ThreePrimeUTR	GT	-	-	0.253476	0.209133	0.214245	-	FBgn0028737	1	No	-	EF-1-beta and EF-1-delta stimulate the exchange of GDP bound to EF-1-alpha to GTP. (UniProtKB:O96827)		9.7995	9.46589	0.958839	9.11504	9.06539	G	T	FALSE	9	96	50.1979	33.7778	0.0420919	13	88	69.3182	39.6154	0.0291378	0.380456	3	40	22.85	15.3333	0.0328118	0.622258	0.93727	0.0443434	-15.0799	-15.1242	-4	22	6	2R	16869128
eEF1beta	2R:16869133	ThreePrimeUTR	TA	-	-	0.264866	0.32163	0.496154	-	FBgn0028737	1	No	-	EF-1-beta and EF-1-delta stimulate the exchange of GDP bound to EF-1-alpha to GTP. (UniProtKB:O96827)		9.7995	9.46589	0.958839	9.11504	9.06539	T	A	FALSE	16	89	33.6742	28.6875	0.0519164	10	91	55.7473	28.1	0.0745525	0.525619	3	40	10.2	13.3333	0.0397712	0.0786753	0.243773	-0.0567643	-13.0685	-13.0117	6	26	13	2R	16869133
Cbp53E	2R:16994624	ThreePrimeUTR	GA	-	-	1	0.255376	0	-	FBgn0004580	1	No	-	Calbindin 53E (Cbp53E) encodes a 6 EF-hand domain-containing protein that regulates neuronal development.		1.30572	7.41617	5.73528e-30	0.0214916	0.203984	G	A	FALSE	1	104	9.32692	13	0	11	90	101.644	63	0.0359227	0.000134995	0	43	3.5814	0	0	0	0	0.744624	1	0.255376	-10	12	1	2R	16994624
Cbp53E	2R:16995543	ThreePrimeUTR	CT	-	-	0	0.333151	0	-	FBgn0004580	1	No	-	Calbindin 53E (Cbp53E) encodes a 6 EF-hand domain-containing protein that regulates neuronal development.		1.30572	7.41617	5.73528e-30	0.0214916	0.203984	C	T	FALSE	0	105	8.26667	0	0	12	89	93.0449	99.3333	0.0944363	0	0	43	3.5814	0	0	0	0	-0.333151	0	0.333151	-12	12	0	2R	16995543
mbl	2R:17265743	FivePrimeUTR	GA	-	-	0.172237	0.195613	0	-	FBgn0265487	1	No	-	muscleblind (mbl) encodes an RNA binding protein that regulates RNA metabolism at the levels of alternative splicing, transcript localization and miRNA and circRNA biogenesis. It contributes to terminal muscle, eye and neural differentiation.		7.78883	7.80422	0.853422	4.6302	4.32818	G	A	FALSE	12	93	435.828	293.75	0.0228512	7	94	455.266	400	0.0273308	0.530773	0	43	21.7674	0	0	0	0	-0.023376	0.172237	0.195613	5	19	12	2R	17265743
mbl	2R:17379282	ThreePrimeUTR	AC	-	-	0.279141	0.278762	0	-	FBgn0265487	1	No	-	muscleblind (mbl) encodes an RNA binding protein that regulates RNA metabolism at the levels of alternative splicing, transcript localization and miRNA and circRNA biogenesis. It contributes to terminal muscle, eye and neural differentiation.		7.78883	7.80422	0.853422	4.6302	4.32818	A	C	FALSE	10	95	44.2842	29.6	0.0270518	21	80	45.675	35.0952	0.0281243	0.993342	0	43	3.86047	0	0	0	0	0.000378889	0.279141	0.278762	-11	31	10	2R	17379282
mthl3	2R:17448808	ThreePrimeUTR	GT	-	-	0.587107	0.227982	0.604645	-	FBgn0028956	-1	No	-	Predicted to enable G protein-coupled receptor activity. Predicted to be involved in G protein-coupled receptor signaling pathway; determination of adult lifespan; and response to starvation. Predicted to be located in membrane. Is expressed in embryonic abdominal neuromere; eye disc morphogenetic furrow; and wing disc.		0.814694	0.546976	0.535499	2.78478	2.80729	C	A	FALSE	6	99	11.2828	18.3333	0.117074	2	99	8.57576	31	0.0540691	0.146297	15	28	14.3571	27.4	0.0321734	0.843909	0.000942992	0.359125	-26.8129	-27.172	4	8	-9	2R	17448808
stau	2R:18120116	CDS	GC	E	Q	0.697598	0.68902	0	Missense	FBgn0003520	-1	No	-	staufen (stau) encodes a double-stranded RNA binding protein involved in mRNA localization. It contributes to anterior and posterior patterning, nervous system development and long term memory.	ESSSNSTSNT	4.44166	4.66054	0.757459	1.80575	1.39983	C	G	FALSE	15	90	118.956	36.6	0.0760838	12	89	104.315	76.0833	0.0857331	0.94089	0	43	32.7442	0	0	0	0	0.00857775	0.697598	0.68902	3	27	15	2R	18120116
Spn55B	2R:18126718	CDS	CT	N	N	0.787061	0.691789	0.499138	Silent	FBgn0028983	1	No	Serpin_dom	Enables serine-type endopeptidase inhibitor activity. Involved in negative regulation of proteolysis. Predicted to be active in extracellular space. Is expressed in embryonic/larval garland cell; garland cell primordium; gut; and head mesoderm. Human ortholog(s) of this gene implicated in Alzheimer's disease; autosomal recessive nonsyndromic deafness 91; and peeling skin syndrome. Orthologous to …	NKLYVQEGKQ	5.12854	4.50077	0.629621	6.61101	6.31486	C	T	FALSE	24	81	128.827	62.75	0.0504789	15	86	102.733	74.5333	0.0687412	0.262931	12	31	73.4516	48.1667	0.0238218	0.000429235	0.0237695	0.0952727	-47.3796	-47.4749	9	39	12	2R	18126718
pAbp	2R:18145394	ThreePrimeUTR	CT	-	-	0.246304	0.128866	0	-	FBgn0265297	1	No	-	Binds the poly(A) tail of mRNA (PubMed:2125288). Since it interacts with the cap-associating translation initiation factor eIF4G, it is likely that it functions by linking Atx2 to the cap-binding complex (PubMed:28388438). Forms a complex with tyf and Atx2 which functions in adult circadian pacemaker neurons to sustain circadian rhythms likely by switching between activator and repressor modes of…		8.63626	8.36071	0.0632563	6.39335	6.25444	C	T	FALSE	11	94	311.585	179.091	0.0398198	1	100	252.44	194	0	0.414484	0	43	96.093	0	0	0	0	0.117438	0.246304	0.128866	10	12	11	2R	18145394
pAbp	2R:18145646	ThreePrimeUTR	GA	-	-	0.164445	0.268276	0.154878	-	FBgn0265297	1	No	-	Binds the poly(A) tail of mRNA (PubMed:2125288). Since it interacts with the cap-associating translation initiation factor eIF4G, it is likely that it functions by linking Atx2 to the cap-binding complex (PubMed:28388438). Forms a complex with tyf and Atx2 which functions in adult circadian pacemaker neurons to sustain circadian rhythms likely by switching between activator and repressor modes of…		8.63626	8.36071	0.0632563	6.39335	6.25444	G	A	FALSE	11	94	413.84	273.636	0.0209783	8	93	308.935	188.625	0.10834	0.288048	2	41	105	48.5	0.045122	0.86029	0.631297	-0.103831	-48.3356	-48.2317	3	19	9	2R	18145646
lolal	2R:18154972	ThreePrimeUTR	GA	-	-	0.558616	0.609007	0.530366	-	FBgn0022238	-1	No	-	lola like (lolal) encodes a small BTB-domain protein related to the Trithorax group of chromatin regulators. lolal transcripts are found in oocytes and the protein translocates to embryonic nuclei after the maternal to zygotic transition. lolal homozygous germline clone embryos show reduced dpp expression during dorsal-ventral patterning.		6.68567	7.52511	0.334733	4.83711	4.59061	C	T	FALSE	36	69	76.8261	66.75	0.0357221	29	72	84.7222	102.31	0.0466586	0.38628	7	36	17	21.1429	0.0336979	0.73534	0.424623	-0.0503904	-20.5842	-20.5339	7	65	29	2R	18154972
CG42518	2R:18168226	CDS	TC	F	F	0.644363	0.676323	0.381236	Silent	FBgn0260392	1	No	-	Is expressed in adult heart and organism. Orthologous to human NCBP2AS2 (NCBP2 antisense 2 (head to head)).	FKNNVRQELE	3.42584	4.89962	0.0806782	5.74827	5.09481	T	C	FALSE	14	91	23.4066	59.2143	0.0770404	18	83	35.9036	74	0.0821147	0.783628	7	36	37.9167	58.7143	0.0421877	0.0325843	0.0403478	-0.0319601	-58.0699	-58.038	-4	32	7	2R	18168226
MED9	2R:18168226	ThreePrimeUTR	TC	-	-	0.644363	0.676323	0.381236	-	FBgn0260401	1	No	-	Component of the Mediator complex, a coactivator involved in the regulated transcription of nearly all RNA polymerase II-dependent genes. Mediator functions as a bridge to convey information from gene-specific regulatory proteins to the basal RNA polymerase II transcription machinery. Mediator is recruited to promoters by direct interactions with regulatory proteins and serves as a scaffold for t…		2.19875	3.15931	0.00979101	3.35379	2.93508	T	C	FALSE	14	91	23.4066	59.2143	0.0770404	18	83	35.9036	74	0.0821147	0.783628	7	36	37.9167	58.7143	0.0421877	0.0325843	0.0403478	-0.0319601	-58.0699	-58.038	-4	32	7	2R	18168226
CG42518	2R:18168240	CDS	GA	R	H	0.648052	0.624691	0.501154	Missense	FBgn0260392	1	No	-	Is expressed in adult heart and organism. Orthologous to human NCBP2AS2 (NCBP2 antisense 2 (head to head)).	RQELEGVKKE	3.42584	4.89962	0.0806782	5.74827	5.09481	G	A	FALSE	14	91	22.978	55	0.07512	20	81	34.716	65.85	0.0810321	0.84114	7	36	39.1667	50.8571	0.0715319	0.229633	0.401	0.0233612	-50.2091	-50.2325	-6	34	7	2R	18168240
MED9	2R:18168240	ThreePrimeUTR	GA	-	-	0.648052	0.624691	0.501154	-	FBgn0260401	1	No	-	Component of the Mediator complex, a coactivator involved in the regulated transcription of nearly all RNA polymerase II-dependent genes. Mediator functions as a bridge to convey information from gene-specific regulatory proteins to the basal RNA polymerase II transcription machinery. Mediator is recruited to promoters by direct interactions with regulatory proteins and serves as a scaffold for t…		2.19875	3.15931	0.00979101	3.35379	2.93508	G	A	FALSE	14	91	22.978	55	0.07512	20	81	34.716	65.85	0.0810321	0.84114	7	36	39.1667	50.8571	0.0715319	0.229633	0.401	0.0233612	-50.2091	-50.2325	-6	34	7	2R	18168240
CG42518	2R:18168241	CDS	CA	R	R	0.647201	0.64962	0.501154	Silent	FBgn0260392	1	No	-	Is expressed in adult heart and organism. Orthologous to human NCBP2AS2 (NCBP2 antisense 2 (head to head)).	RQELEGVKKE	3.42584	4.89962	0.0806782	5.74827	5.09481	C	A	FALSE	14	91	23	54.8571	0.0754151	19	82	34.622	66.6842	0.0812237	0.983322	7	36	39.1389	50.8571	0.0715319	0.2337	0.305778	-0.00241866	-50.2099	-50.2075	-5	33	7	2R	18168241
MED9	2R:18168241	ThreePrimeUTR	CA	-	-	0.647201	0.64962	0.501154	-	FBgn0260401	1	No	-	Component of the Mediator complex, a coactivator involved in the regulated transcription of nearly all RNA polymerase II-dependent genes. Mediator functions as a bridge to convey information from gene-specific regulatory proteins to the basal RNA polymerase II transcription machinery. Mediator is recruited to promoters by direct interactions with regulatory proteins and serves as a scaffold for t…		2.19875	3.15931	0.00979101	3.35379	2.93508	C	A	FALSE	14	91	23	54.8571	0.0754151	19	82	34.622	66.6842	0.0812237	0.983322	7	36	39.1389	50.8571	0.0715319	0.2337	0.305778	-0.00241866	-50.2099	-50.2075	-5	33	7	2R	18168241
CG10916	2R:18174606	ThreePrimeUTR	GT	-	-	0.695754	0.751092	0.545455	-	FBgn0034312	1	No	-	CG10916 encodes a zinc ion binding protein with ubiquitin-protein transferase activity. It is involved in intracellular signal transduction, determination of lifespan, protein ubiquitination and hypoxia.		3.28269	4.13833	0.972996	3.18837	2.73036	G	T	FALSE	12	93	23.4946	31.5833	0.0837046	9	92	36.837	41.1111	0.104649	0.680703	1	42	6.04762	22	0	0.628284	0.551632	-0.0553377	-21.3042	-21.2489	3	21	11	2R	18174606
CG30116	2R:18457217	ThreePrimeUTR	CT	-	-	0.767699	1	0	-	FBgn0028496	-1	No	-	Is expressed in several structures, including embryonic central brain neurons; embryonic/larval midgut; embryonic/larval nervous system; presumptive embryonic/larval system; and ventral midline of embryo.		2.05783	0.888285	0.000330328	0.132941	0.0831169	G	A	FALSE	13	92	10.4674	74.3846	0.0840817	3	98	4.61224	34.6667	0	0.217217	0	43	0.790698	0	0	0	0	-0.232301	0.767699	1	10	16	13	2R	18457217
mRpS28	2R:18614289	CDS	CT	T	T	0.737888	0.798957	0	Silent	FBgn0034361	-1	No	-	Predicted to be a structural constituent of ribosome. Predicted to be involved in mitochondrial translation. Predicted to be part of mitochondrial small ribosomal subunit. Is expressed in several structures, including anterior endoderm anlage; dorsal pharyngeal muscle cell; embryonic/larval midgut; embryonic/larval midgut primordium; and endoderm. Human ortholog(s) of this gene implicated in comb…	TRQSTAKTTP	4.05182	3.33757	0.565129	2.32625	2.50618	G	A	FALSE	12	93	16.4731	23.6667	0.071506	12	89	10.573	27.25	0.0758583	0.563973	0	43	4.13953	0	0	0	0	-0.0610682	0.737888	0.798957	0	24	12	2R	18614289
Atg7	2R:18624812	CDS	CT	R	C	0.794771	0.750096	0.4	Missense	FBgn0034366	-1	No	Atg7_N	Autophagy-related 7 (Atg7) encodes an E1-type ligase for the autophagic ubiquitin-like proteins encoded by Atg8a and Atg12. Its roles include autophagosome formation, maintaining neuromuscular function and normal lifespan.	RNASGCLLEV	1.19905	2.12333	0.1289	2.07695	1.0313	G	A	FALSE	5	100	4.84	30.8	0.126392	11	90	3.87778	54.6364	0.0986396	0.796463	1	42	3.92857	15	0	0.271296	0.329708	0.0446749	-14.2052	-14.2499	-6	16	4	2R	18624812
Cth	2R:18629347	ThreePrimeUTR	GT	-	-	0.831525	0.702457	0	-	FBgn0000566	1	No	-	Cystathionine gamma-lyase (Cth) encodes a protein involved in glutathione biosynthesis.		3.68245	2.94686	0.326511	4.49188	4.5084	G	T	FALSE	16	89	4.68539	23.75	0.0722204	8	93	5.01075	21.375	0.145619	0.380392	0	43	4.53488	0	0	0	0	0.129068	0.831525	0.702457	8	24	16	2R	18629347
Ntan1	2R:18641543	CDS	GA	E	E	0.8541	0.806504	0	Silent	FBgn0034371	-1	No	NTAN1	Enables protein-N-terminal asparagine amidohydrolase activity. Involved in negative regulation of glial cell proliferation; positive regulation of DNA endoreduplication; and ubiquitin-dependent protein catabolic process via the N-end rule pathway. Located in nucleus. Is expressed in central nervous system; epidermis; and glial cell. Orthologous to human NTAN1 (N-terminal asparagine amidase).	ENQFPAVTVF	1.74806	1.63075	0.811332	0.596864	1.10171	C	T	FALSE	14	91	4.59341	54.8571	0.0671268	9	92	4.97826	43.1111	0.0978677	0.682001	0	43	3.69767	0	0	0	0	0.0475962	0.8541	0.806504	5	23	14	2R	18641543
Ntan1	2R:18641716	CDS	GA	M	L	0.846954	0.805036	0	Missense	FBgn0034371	-1	No	NTAN1	Enables protein-N-terminal asparagine amidohydrolase activity. Involved in negative regulation of glial cell proliferation; positive regulation of DNA endoreduplication; and ubiquitin-dependent protein catabolic process via the N-end rule pathway. Located in nucleus. Is expressed in central nervous system; epidermis; and glial cell. Orthologous to human NTAN1 (N-terminal asparagine amidase).	MWLSQTDEFL	1.74806	1.63075	0.811332	0.596864	1.10171	C	T	FALSE	15	90	4.96667	48.3333	0.0550782	8	93	4.96774	38.5	0.0993608	0.691576	0	43	3.51163	0	0	0	0	0.0419182	0.846954	0.805036	7	23	15	2R	18641716
Gint3	2R:18658481	ThreePrimeUTR	GA	-	-	0.765204	0.601269	0	-	FBgn0034372	-1	No	-	ubiquitin-like protein that functions in protein degradation - required for Wingless target gene expression		2.91087	4.05022	0.0524434	1.78248	1.50677	C	T	FALSE	29	76	8.48684	23.5862	0.053212	46	55	15.2909	36.913	0.0446802	0.0226144	0	43	5.2093	0	0	0	0	0.163935	0.765204	0.601269	-17	75	29	2R	18658481
CG42306	2R:18658481	ThreePrimeUTR	GA	-	-	0.765204	0.601269	0	-	FBgn0259202	-1	No	-	Is expressed in organism.		2.91087	4.05022	0.0727675	1.78248	1.50677	C	T	FALSE	29	76	8.48684	23.5862	0.053212	46	55	15.2909	36.913	0.0446802	0.0226144	0	43	5.2093	0	0	0	0	0.163935	0.765204	0.601269	-17	75	29	2R	18658481
Gint3	2R:18659841	CDS	TC	Y	Y	0.701472	0.772198	0	Silent	FBgn0034372	-1	No	-	ubiquitin-like protein that functions in protein degradation - required for Wingless target gene expression	YEAYVPPKRN	2.91087	4.05022	0.0524434	1.78248	1.50677	A	G	FALSE	19	86	8.67442	36	0.074319	22	79	13	42.6818	0.0575373	0.450186	0	43	4.30233	0	0	0	0	-0.0707267	0.701472	0.772198	-3	41	19	2R	18659841
CG42306	2R:18659841	ThreePrimeUTR	TC	-	-	0.701472	0.772198	0	-	FBgn0259202	-1	No	-	Is expressed in organism.		2.91087	4.05022	0.0727675	1.78248	1.50677	A	G	FALSE	19	86	8.67442	36	0.074319	22	79	13	42.6818	0.0575373	0.450186	0	43	4.30233	0	0	0	0	-0.0707267	0.701472	0.772198	-3	41	19	2R	18659841
tn	2R:19008869	ThreePrimeUTR	CT	-	-	0.638964	0.628727	0.490568	-	FBgn0265356	1	No	-	thin (tn) encodes a TRIM/RBCC protein involved in myofibril assembly and stability.		1.95703	1.65218	0.866685	5.7593	5.0057	C	T	FALSE	3	102	24.902	44.6667	0.184562	8	93	11.6129	65.625	0.103238	0.960689	15	28	134.214	61.6	0.0220426	0.109348	0.0983259	0.0102369	-60.961	-60.9713	-5	11	-12	2R	19008869
Fkbp12	2R:19290961	ThreePrimeUTR	TA	-	-	0.539906	0.483181	0	-	FBgn0013954	1	No	-	FK506-binding protein 12kD (Fkbp12) encodes a protein that binds the intracellular calcium channel encoded by RyR in an oxidation dependent manner. Loss of the binding between the products of Fkbp12 and RyR results in increased calcium leak and reduced muscle function.		10.9805	10.3498	0.300057	7.54456	7.90627	T	A	FALSE	34	71	21.6338	27	0.0264248	22	79	20.6456	22.9545	0.0390286	0.216966	0	43	7.16279	0	0	0	0	0.056725	0.539906	0.483181	12	56	34	2R	19290961
cer	2R:19396216	ThreePrimeUTR	TG	-	-	0.165219	0.31044	0.251681	-	FBgn0034443	-1	No	-	Enables cysteine-type endopeptidase inhibitor activity. Involved in inhibition of cysteine-type endopeptidase activity; long-term memory; and short-term memory. Located in endomembrane system. Is expressed in adult head; embryonic/larval garland cell; and prothoracic gland.		7.87806	9.26399	0.829154	11.4331	10.662	A	C	FALSE	4	101	20.3366	44.75	0.0102572	2	99	23.9495	38	0.118132	0.121064	15	28	100.75	73.2667	0.0184534	0.0312141	0.352877	-0.14522	-73.1014	-72.9562	2	6	-11	2R	19396216
betaTub56D	2R:19447592	CDS	CT	D	D	0.215422	0.181387	0.261673	Silent	FBgn0284243	-1	No	-	Tubulin is the major constituent of microtubules, a cylinder consisting of laterally associated linear protofilaments composed of alpha- and beta-tubulin heterodimers. Microtubules grow by the addition of GTP-tubulin dimers to the microtubule end, where a stabilizing cap forms. Below the cap, tubulin dimers are in GDP-bound state, owing to GTPase activity of alpha-tubulin. (UniProtKB:Q24560)	DEMEFTEAES	12.035	12.8548	5.33957e-11	7.87017	8.37422	G	A	FALSE	14	91	3580.65	1021.64	0.0246127	5	96	5697.74	1766.6	0.017939	0.441265	2	41	386.927	218	0.0255615	0.504277	0.0587636	0.0340343	-217.785	-217.819	9	19	12	2R	19447592
betaTub56D	2R:19447599	CDS	GA	G	D	0.304181	0.248717	0.382289	Missense	FBgn0284243	-1	No	-	Tubulin is the major constituent of microtubules, a cylinder consisting of laterally associated linear protofilaments composed of alpha- and beta-tubulin heterodimers. Microtubules grow by the addition of GTP-tubulin dimers to the microtubule end, where a stabilizing cap forms. Below the cap, tubulin dimers are in GDP-bound state, owing to GTPase activity of alpha-tubulin. (UniProtKB:Q24560)	GMDEMEFTEA	12.035	12.8548	5.33957e-11	7.87017	8.37422	C	T	FALSE	68	37	3274.46	1105.6	0.011972	63	38	4190.87	1552.83	0.0112994	0.00103649	27	16	352.75	220.741	0.0299819	0.00436177	1.74433e-06	0.0554639	-220.437	-220.492	5	131	41	2R	19447599
Tbcb	2R:19485997	CDS	GA	G	G	0.585432	0.342809	0.231602	Silent	FBgn0034451	-1	No	CAP-Gly_domain	Tubulin-binding cofactor B (Tbcb) encodes one of the cofactors required for the assembly of functional alpha/beta-Tubulin dimers needed for microtubule assembly. It is essential for microtubule-associated transport and cell polarity, but not for cell division.	GKNNGSFGGK	4.67956	5.43413	0.311571	3.92682	3.43101	C	T	FALSE	12	93	46.4731	80.25	0.0927827	9	92	81.8587	100.222	0.0616209	0.0577159	2	41	17.3415	44.5	0.101732	0.161529	0.451532	0.242623	-43.9146	-44.1572	3	21	10	2R	19485997
CG8929	2R:20330621	ThreePrimeUTR	CT	-	-	0.44424	0.489442	0.368421	-	FBgn0034504	1	No	-	Is expressed in organism.		4.60915	4.56406	0.346159	2.77115	2.34501	C	T	FALSE	4	101	64.4653	47.25	0.155063	11	90	65.2889	61.3636	0.105723	0.824297	1	42	23.0238	19	0	0.84094	0.747882	-0.0452014	-18.5558	-18.5106	-7	15	3	2R	20330621
HnRNP-K	2R:20606788	ThreePrimeUTR	GA	-	-	0.276303	0.282734	0	-	FBgn0267791	1	No	-	Heterogeneous nuclear ribonucleoprotein K (HnRNP-K) encodes a member of the hnRNP family of DNA/RNA binding proteins. It localizes, along with other hnRNPs, in nucleoplasmic omega speckles. It is involved in gene regulation, post-transcriptional RNA processing and RNA transport.		6.05083	6.12789	0.979998	2.41339	2.41043	G	A	FALSE	20	85	105.2	62.9	0.0383988	8	93	75.3871	49	0.0416449	0.923726	0	43	16.4884	0	0	0	0	-0.00643084	0.276303	0.282734	12	28	20	2R	20606788
Act57B	2R:20946431	ThreePrimeUTR	TC	-	-	0.162428	0.275862	0.23704	-	FBgn0000044	1	No	-	Actin 57B (Act57B) is one of several actin genes in the Drosophila genome, and one of the few that encode myofibrillar actin. This essential gene is a transcriptional target of Mef2 and Cf2 and is expressed in all embryonic muscles and a subset of adult muscle.		8.42558	7.86	0.961214	12.6695	13.1688	T	C	FALSE	2	103	25.1553	49.5	0.0114848	1	100	27.39	29	0	0.110517	12	31	75.4516	172.25	0.0227247	0.220133	0.644898	-0.113434	-172.088	-171.974	1	3	-10	2R	20946431
CG9344	2R:20977348	CDS	CT	N	N	0.688868	0.629591	0.390445	Silent	FBgn0034564	1	No	Sm_dom_euk/arc	Predicted to enable RNA binding activity. Predicted to be involved in mRNA splicing, via spliceosome and maturation of SSU-rRNA. Predicted to be part of sno(s)RNA-containing ribonucleoprotein complex; spliceosomal complex; and spliceosomal snRNP complex. Predicted to be active in P-body and nucleolus. Is expressed in organism. Orthologous to human LSM6 (LSM6 homolog, U6 small nuclear RNA and mRNA…	NICLEQTEEY	5.06235	4.57082	0.595889	1.73156	2.29314	C	T	FALSE	40	65	62.3538	94.95	0.045833	35	66	53.9545	121.4	0.0419823	0.348346	7	36	17.9167	12.1429	0.0490443	0.0108305	0.0181463	0.0592771	-11.454	-11.5133	5	75	33	2R	20977348
CG9344	2R:20977417	CDS	CT	I	I	0.634926	0.627329	0	Silent	FBgn0034564	1	No	Sm_dom_euk/arc	Predicted to enable RNA binding activity. Predicted to be involved in mRNA splicing, via spliceosome and maturation of SSU-rRNA. Predicted to be part of sno(s)RNA-containing ribonucleoprotein complex; spliceosomal complex; and spliceosomal snRNP complex. Predicted to be active in P-body and nucleolus. Is expressed in organism. Orthologous to human LSM6 (LSM6 homolog, U6 small nuclear RNA and mRNA…	IRGNNVLYIS	5.06235	4.57082	0.595889	1.73156	2.29314	C	T	FALSE	39	66	60.4848	78.2051	0.0499595	36	65	51.9231	88.5556	0.04288	0.909152	0	43	19.9767	0	0	0	0	0.00759725	0.634926	0.627329	3	75	39	2R	20977417
Sou	2R:21016832	CDS	CT	I	I	0.717184	0.625792	0	Silent	FBgn0034573	-1	No	-	Predicted to enable ubiquitin protein ligase activity. Predicted to contribute to ubiquitin-protein transferase activity. Involved in positive regulation of proteasomal ubiquitin-dependent protein catabolic process. Part of GID complex. Is expressed in organism. Orthologous to human RMND5A (required for meiotic nuclear division 5 homolog A) and RMND5B (required for meiotic nuclear division 5 homo…	IGKAIDRNFS	2.95745	3.85414	0.380807	3.50411	3.17497	G	A	FALSE	14	91	14.3187	24.6429	0.0639542	22	79	12.557	36.5455	0.0595448	0.319702	0	43	16.5116	0	0	0	0	0.0913914	0.717184	0.625792	-8	36	14	2R	21016832
Sou	2R:21016874	CDS	GT	M	L	0.62171	0.660397	0	Missense	FBgn0034573	-1	No	-	Predicted to enable ubiquitin protein ligase activity. Predicted to contribute to ubiquitin-protein transferase activity. Involved in positive regulation of proteasomal ubiquitin-dependent protein catabolic process. Part of GID complex. Is expressed in organism. Orthologous to human RMND5A (required for meiotic nuclear division 5 homolog A) and RMND5B (required for meiotic nuclear division 5 homo…	MSTEHRDLHG	2.95745	3.85414	0.380807	3.50411	3.17497	C	A	FALSE	13	92	15.1196	25.3077	0.0631875	22	79	14.1392	34.8636	0.0567367	0.664708	0	43	16.5116	0	0	0	0	-0.0386873	0.62171	0.660397	-9	35	13	2R	21016874
RIC-3	2R:21024819	ThreePrimeUTR	TA	-	-	0.755927	0.630052	0.495771	-	FBgn0050296	1	No	-	RIC3 acetylcholine receptor chaperone (RIC-3) encodes a protein that assists with nicotinic acetylcholine receptor protein folding.		2.4539	2.55791	0.576762	3.57648	3.13137	T	A	FALSE	11	94	14.3191	19.0909	0.0894924	6	95	16.4211	34.8333	0.119481	0.414367	7	36	21.8611	22.4286	0.0658173	0.0531806	0.327482	0.125875	-21.6726	-21.7985	5	17	4	2R	21024819
RIC-3	2R:21024821	ThreePrimeUTR	CA	-	-	0.709025	0.613309	0.516325	-	FBgn0050296	1	No	-	RIC3 acetylcholine receptor chaperone (RIC-3) encodes a protein that assists with nicotinic acetylcholine receptor protein folding.		2.4539	2.55791	0.576762	3.57648	3.13137	C	A	FALSE	12	93	14.7849	19	0.0910724	6	95	16.7053	37.3333	0.119993	0.544176	9	34	22.2353	20.7778	0.0540259	0.111819	0.422622	0.0957161	-20.0688	-20.1645	6	18	3	2R	21024821
RIC-3	2R:21024825	ThreePrimeUTR	CT	-	-	0.729565	0.598597	0.544367	-	FBgn0050296	1	No	-	RIC3 acetylcholine receptor chaperone (RIC-3) encodes a protein that assists with nicotinic acetylcholine receptor protein folding.		2.4539	2.55791	0.576762	3.57648	3.13137	C	T	FALSE	11	94	14.8298	19.6364	0.0974089	8	93	16.8065	32.25	0.120379	0.405405	10	33	22.3939	19.9	0.0543696	0.122934	0.665436	0.130968	-19.1704	-19.3014	3	19	1	2R	21024825
mRpL54	2R:21061167	CDS	GA	V	V	0.834757	0.902126	0.315789	Silent	FBgn0034579	1	No	Ribosomal_mL54	Predicted to be a structural constituent of ribosome. Predicted to be involved in mitochondrial translation. Predicted to be part of mitochondrial large ribosomal subunit. Orthologous to human MRPL54 (mitochondrial ribosomal protein L54).	VCGSNYMKTG	2.99857	2.78349	0.656978	2.12176	2.06846	G	A	FALSE	16	89	26.427	52	0.056556	14	87	18.5172	51.6429	0.0565007	0.408695	1	42	13.0238	38	0	0.041803	0.0189202	-0.0673689	-37.1652	-37.0979	2	30	15	2R	21061167
mRpL54	2R:21061371	CDS	CT	R	R	0.892451	0.890443	0.333333	Silent	FBgn0034579	1	No	-	Predicted to be a structural constituent of ribosome. Predicted to be involved in mitochondrial translation. Predicted to be part of mitochondrial large ribosomal subunit. Orthologous to human MRPL54 (mitochondrial ribosomal protein L54).	RLRKLALRRN	2.99857	2.78349	0.656978	2.12176	2.06846	C	T	FALSE	12	93	22.6667	29.5833	0.0525357	11	90	15.7778	37.3636	0.0739997	0.98232	1	42	12.7143	21	0	0.0131686	0.054863	0.00200838	-20.1075	-20.1096	1	23	11	2R	21061371
CG10527	2R:21070769	CDS	GA	G	E	0.219463	0.226506	0	Missense	FBgn0034583	-1	No	DM9_repeat	Located in cytoplasm. Is expressed in several structures, including adult head; glial cell; hindgut; reproductive system; and ring gland.	GNIPPNALPA	10.0754	9.14575	0.669993	8.67756	8.24545	C	T	FALSE	18	105	404.771	292.111	0.0352256	9	101	336.119	252.667	0.0366829	0.901567	0	43	197.023	0	0	0	0	-0.00704272	0.219463	0.226506	9	27	18	2R	21070769
Gar1	2R:21096595	CDS	TC	L	L	0.661492	0.79902	0	Silent	FBgn0011824	-1	No	K_chnl_dom	Required for ribosome biogenesis. Part of a complex which catalyzes pseudouridylation of rRNA. This involves the isomerization of uridine such that the ribose is subsequently attached to C5, instead of the normal N1. Pseudouridine ('psi') residues may serve to stabilize the conformation of rRNAs (By similarity). (UniProtKB:Q7KVQ0)	LENKEQVGKI	2.57389	2.69217	0.919731	0.525297	0.513555	A	G	FALSE	13	105	16.9714	35.2308	0.0837179	16	101	17.9802	36.6875	0.0565701	0.172082	0	43	12.4186	0	0	0	0	-0.137528	0.661492	0.79902	-3	29	13	2R	21096595
Gar1	2R:21097112	CDS	AT	G	G	0.80641	0.649203	0	Silent	FBgn0011824	-1	No	K_chnl_dom	Required for ribosome biogenesis. Part of a complex which catalyzes pseudouridylation of rRNA. This involves the isomerization of uridine such that the ribose is subsequently attached to C5, instead of the normal N1. Pseudouridine ('psi') residues may serve to stabilize the conformation of rRNAs (By similarity). (UniProtKB:Q7KVQ0)	GRGGGGGFGR	2.57389	2.69217	0.919731	0.525297	0.513555	T	A	FALSE	5	105	15.0952	20	0.122642	13	101	14.9505	32.0769	0.079829	0.309282	0	43	12.3488	0	0	0	0	0.157207	0.80641	0.649203	-8	18	5	2R	21097112
Gar1	2R:21097115	CDS	AC	G	G	0.787013	0.655254	0	Silent	FBgn0011824	-1	No	K_chnl_dom	Required for ribosome biogenesis. Part of a complex which catalyzes pseudouridylation of rRNA. This involves the isomerization of uridine such that the ribose is subsequently attached to C5, instead of the normal N1. Pseudouridine ('psi') residues may serve to stabilize the conformation of rRNAs (By similarity). (UniProtKB:Q7KVQ0)	GGRGGGGGFG	2.57389	2.69217	0.919731	0.525297	0.513555	T	G	FALSE	5	105	14.9048	20.6	0.134502	13	101	14.5941	32.8462	0.0822649	0.412639	0	43	12.3256	0	0	0	0	0.131759	0.787013	0.655254	-8	18	5	2R	21097115
Gar1	2R:21097118	CDS	CT	G	G	0.787013	0.637034	0	Silent	FBgn0011824	-1	No	K_chnl_dom	Required for ribosome biogenesis. Part of a complex which catalyzes pseudouridylation of rRNA. This involves the isomerization of uridine such that the ribose is subsequently attached to C5, instead of the normal N1. Pseudouridine ('psi') residues may serve to stabilize the conformation of rRNAs (By similarity). (UniProtKB:Q7KVQ0)	GGGRGGGGGF	2.57389	2.69217	0.919731	0.525297	0.513555	G	A	FALSE	5	105	14.8095	20.6	0.134502	14	101	14.3168	32	0.0781101	0.34168	0	43	12.3023	0	0	0	0	0.149979	0.787013	0.637034	-9	19	5	2R	21097118
Gar1	2R:21097124	CDS	AT	G	G	0.795455	0.649735	0	Silent	FBgn0011824	-1	No	K_chnl_dom	Required for ribosome biogenesis. Part of a complex which catalyzes pseudouridylation of rRNA. This involves the isomerization of uridine such that the ribose is subsequently attached to C5, instead of the normal N1. Pseudouridine ('psi') residues may serve to stabilize the conformation of rRNAs (By similarity). (UniProtKB:Q7KVQ0)	GGGGGRGGGG	2.57389	2.69217	0.919731	0.525297	0.513555	T	A	FALSE	5	105	14.1714	19.4	0.128788	15	101	13.4356	27.8667	0.0783489	0.359473	0	43	12.2791	0	0	0	0	0.14572	0.795455	0.649735	-10	20	5	2R	21097124
Gar1	2R:21097136	CDS	AC	G	G	0.704928	0.526714	0	Silent	FBgn0011824	-1	No	K_chnl_dom	Required for ribosome biogenesis. Part of a complex which catalyzes pseudouridylation of rRNA. This involves the isomerization of uridine such that the ribose is subsequently attached to C5, instead of the normal N1. Pseudouridine ('psi') residues may serve to stabilize the conformation of rRNAs (By similarity). (UniProtKB:Q7KVQ0)	GGGRGGGGGR	2.57389	2.69217	0.919731	0.525297	0.513555	T	G	FALSE	4	105	13.819	19.25	0.178267	11	101	12.6436	29.3636	0.0905352	0.348985	0	43	12.2326	0	0	0	0	0.178214	0.704928	0.526714	-7	15	4	2R	21097136
Gar1	2R:21097145	CDS	TA	G	G	0.752841	0.610236	0	Silent	FBgn0011824	-1	No	K_chnl_dom	Required for ribosome biogenesis. Part of a complex which catalyzes pseudouridylation of rRNA. This involves the isomerization of uridine such that the ribose is subsequently attached to C5, instead of the normal N1. Pseudouridine ('psi') residues may serve to stabilize the conformation of rRNAs (By similarity). (UniProtKB:Q7KVQ0)	GGGGGGRGGG	2.57389	2.69217	0.919731	0.525297	0.513555	A	T	FALSE	4	105	13.1429	19.75	0.152344	11	101	12.4158	25.7273	0.0930229	0.441501	0	43	12.186	0	0	0	0	0.142605	0.752841	0.610236	-7	15	4	2R	21097145
mago	2R:21128635	FivePrimeUTR	CG	-	-	0.653047	0.772189	0.263158	-	FBgn0002736	1	No	-	mago nashi (mago) encodes a protein that is part of the exon junction complex, which is required for post-transcriptional processes such as pre-mRNA splicing, RNA localization and nonsense-mediated decay. It is involved in germline development, germplasm assembly and photoreceptor differentiation.		3.46187	3.46022	0.901201	3.13284	3.19197	C	G	FALSE	14	91	32.8901	28.7857	0.0845458	16	85	18.0235	58.375	0.0748267	0.298519	1	42	15.2381	19	0	0.255058	0.119737	-0.119141	-18.347	-18.2278	-2	30	13	2R	21128635
mago	2R:21128651	FivePrimeUTR	TC	-	-	0.64421	0.783581	0.266667	-	FBgn0002736	1	No	-	mago nashi (mago) encodes a protein that is part of the exon junction complex, which is required for post-transcriptional processes such as pre-mRNA splicing, RNA localization and nonsense-mediated decay. It is involved in germline development, germplasm assembly and photoreceptor differentiation.		3.46187	3.46022	0.901201	3.13284	3.19197	T	C	FALSE	18	87	27.046	35.1667	0.0766215	17	84	16.3333	57.7647	0.0713861	0.193621	1	42	13.8571	15	0	0.273997	0.107199	-0.139372	-14.3558	-14.2164	1	35	17	2R	21128651
mago	2R:21128682	FivePrimeUTR	CA	-	-	0.606088	0.749014	0	-	FBgn0002736	1	No	-	mago nashi (mago) encodes a protein that is part of the exon junction complex, which is required for post-transcriptional processes such as pre-mRNA splicing, RNA localization and nonsense-mediated decay. It is involved in germline development, germplasm assembly and photoreceptor differentiation.		3.46187	3.46022	0.901201	3.13284	3.19197	C	A	FALSE	17	88	23.5795	35.2353	0.0864684	21	80	14.3375	44	0.0705537	0.203812	0	43	13.3023	0	0	0	0	-0.142926	0.606088	0.749014	-4	38	17	2R	21128682
mago	2R:21128685	FivePrimeUTR	GA	-	-	0.623717	0.751414	0	-	FBgn0002736	1	No	-	mago nashi (mago) encodes a protein that is part of the exon junction complex, which is required for post-transcriptional processes such as pre-mRNA splicing, RNA localization and nonsense-mediated decay. It is involved in germline development, germplasm assembly and photoreceptor differentiation.		3.46187	3.46022	0.901201	3.13284	3.19197	G	A	FALSE	17	88	21.8409	32.5294	0.082154	18	83	13.6145	45.1111	0.0741619	0.255866	0	43	13.0698	0	0	0	0	-0.127697	0.623717	0.751414	-1	35	17	2R	21128685
mago	2R:21129039	CDS	GA	E	E	0.629448	0.757547	0.440314	Silent	FBgn0002736	1	No	Mago_nashi	mago nashi (mago) encodes a protein that is part of the exon junction complex, which is required for post-transcriptional processes such as pre-mRNA splicing, RNA localization and nonsense-mediated decay. It is involved in germline development, germplasm assembly and photoreceptor differentiation.	EHISFTTSKT	3.46187	3.46022	0.901201	3.13284	3.19197	G	A	FALSE	24	81	31.1481	64.1667	0.0680483	23	78	19.8333	78.3913	0.0655459	0.182472	4	39	14.9487	13	0.0964592	0.284286	0.0641615	-0.1281	-12.3706	-12.2425	1	47	20	2R	21129039
mago	2R:21129090	CDS	GC	R	R	0.594775	0.763226	0	Silent	FBgn0002736	1	No	Mago_nashi	mago nashi (mago) encodes a protein that is part of the exon junction complex, which is required for post-transcriptional processes such as pre-mRNA splicing, RNA localization and nonsense-mediated decay. It is involved in germline development, germplasm assembly and photoreceptor differentiation.	RSKDPEGLRC	3.46187	3.46022	0.901201	3.13284	3.19197	G	C	FALSE	22	83	29.2169	41.2727	0.0692032	22	79	17.7975	61.7273	0.0645167	0.0822398	0	43	16.1628	0	0	0	0	-0.168451	0.594775	0.763226	0	44	22	2R	21129090
mago	2R:21129177	CDS	CT	F	F	0.637027	0.730661	0.327273	Silent	FBgn0002736	1	No	Mago_nashi	mago nashi (mago) encodes a protein that is part of the exon junction complex, which is required for post-transcriptional processes such as pre-mRNA splicing, RNA localization and nonsense-mediated decay. It is involved in germline development, germplasm assembly and photoreceptor differentiation.	FKIKPI*	3.46187	3.46022	0.901201	3.13284	3.19197	C	T	FALSE	22	83	27.2289	44.3182	0.0672674	20	81	20.0864	48.9	0.074343	0.354733	2	41	15.3659	13	0.127273	0.190693	0.111357	-0.0936337	-12.363	-12.2693	2	42	20	2R	21129177
mago	2R:21129183	CDS	CT	I	I	0.645119	0.728038	0.34492	Silent	FBgn0002736	1	No	Mago_nashi	mago nashi (mago) encodes a protein that is part of the exon junction complex, which is required for post-transcriptional processes such as pre-mRNA splicing, RNA localization and nonsense-mediated decay. It is involved in germline development, germplasm assembly and photoreceptor differentiation.	IKPI*	3.46187	3.46022	0.901201	3.13284	3.19197	C	T	FALSE	22	83	26.9398	45.8636	0.0662599	20	81	19.7407	49.65	0.0756785	0.412707	2	41	15.0976	14	0.109626	0.196885	0.135045	-0.0829183	-13.3549	-13.272	2	42	20	2R	21129183
mago	2R:21129186	CDS	GA	K	K	0.625998	0.722561	0.361111	Silent	FBgn0002736	1	No	Mago_nashi	mago nashi (mago) encodes a protein that is part of the exon junction complex, which is required for post-transcriptional processes such as pre-mRNA splicing, RNA localization and nonsense-mediated decay. It is involved in germline development, germplasm assembly and photoreceptor differentiation.	KPI*	3.46187	3.46022	0.901201	3.13284	3.19197	G	A	FALSE	21	84	27.5	47.6667	0.0675434	20	81	20.1111	50.15	0.0769351	0.350125	2	41	15.2927	15	0.138889	0.253827	0.16505	-0.0965632	-14.374	-14.2774	1	41	19	2R	21129186
mago	2R:21129211	ThreePrimeUTR	TC	-	-	0.632416	0.776431	0.375	-	FBgn0002736	1	No	-	mago nashi (mago) encodes a protein that is part of the exon junction complex, which is required for post-transcriptional processes such as pre-mRNA splicing, RNA localization and nonsense-mediated decay. It is involved in germline development, germplasm assembly and photoreceptor differentiation.		3.46187	3.46022	0.901201	3.13284	3.19197	T	C	FALSE	22	83	24.7831	43.4545	0.0690991	19	82	17.1829	52.1053	0.0763255	0.168965	1	42	14.6667	16	0	0.44595	0.254895	-0.144015	-15.3676	-15.2236	3	41	21	2R	21129211
mago	2R:21129284	ThreePrimeUTR	AT	-	-	0.5762	0.734269	0	-	FBgn0002736	1	No	-	mago nashi (mago) encodes a protein that is part of the exon junction complex, which is required for post-transcriptional processes such as pre-mRNA splicing, RNA localization and nonsense-mediated decay. It is involved in germline development, germplasm assembly and photoreceptor differentiation.		3.46187	3.46022	0.901201	3.13284	3.19197	A	T	FALSE	18	87	28.1379	48.1667	0.0785386	23	78	17.8974	43.8261	0.0676788	0.134173	0	43	15.5814	0	0	0	0	-0.158069	0.5762	0.734269	-5	41	18	2R	21129284
mago	2R:21129294	ThreePrimeUTR	TC	-	-	0.633598	0.718804	0	-	FBgn0002736	1	No	-	mago nashi (mago) encodes a protein that is part of the exon junction complex, which is required for post-transcriptional processes such as pre-mRNA splicing, RNA localization and nonsense-mediated decay. It is involved in germline development, germplasm assembly and photoreceptor differentiation.		3.46187	3.46022	0.901201	3.13284	3.19197	T	C	FALSE	17	88	24.1818	41.5294	0.0733185	21	80	15.5375	38.9524	0.0763808	0.433428	0	43	13.8605	0	0	0	0	-0.0852061	0.633598	0.718804	-4	38	17	2R	21129294
mago	2R:21129415	ThreePrimeUTR	GA	-	-	0.544264	0.739108	0	-	FBgn0002736	1	No	-	mago nashi (mago) encodes a protein that is part of the exon junction complex, which is required for post-transcriptional processes such as pre-mRNA splicing, RNA localization and nonsense-mediated decay. It is involved in germline development, germplasm assembly and photoreceptor differentiation.		3.46187	3.46022	0.901201	3.13284	3.19197	G	A	FALSE	14	91	18.4615	46.8571	0.0795157	9	92	16.0109	37	0.106201	0.150648	0	43	13.5581	0	0	0	0	-0.194845	0.544264	0.739108	5	23	14	2R	21129415
mago	2R:21129422	ThreePrimeUTR	AC	-	-	0.536437	0.744541	0	-	FBgn0002736	1	No	-	mago nashi (mago) encodes a protein that is part of the exon junction complex, which is required for post-transcriptional processes such as pre-mRNA splicing, RNA localization and nonsense-mediated decay. It is involved in germline development, germplasm assembly and photoreceptor differentiation.		3.46187	3.46022	0.901201	3.13284	3.19197	A	C	FALSE	14	91	18.011	44.1429	0.0787812	9	92	15.5	34.1111	0.10379	0.120776	0	43	13.2558	0	0	0	0	-0.208104	0.536437	0.744541	5	23	14	2R	21129422
mago	2R:21129440	ThreePrimeUTR	GC	-	-	0.559003	0.727437	0	-	FBgn0002736	1	No	-	mago nashi (mago) encodes a protein that is part of the exon junction complex, which is required for post-transcriptional processes such as pre-mRNA splicing, RNA localization and nonsense-mediated decay. It is involved in germline development, germplasm assembly and photoreceptor differentiation.		3.46187	3.46022	0.901201	3.13284	3.19197	G	C	FALSE	14	91	16.7802	45.1429	0.0755202	11	90	14.3444	33.0909	0.10083	0.185367	0	43	13.1163	0	0	0	0	-0.168434	0.559003	0.727437	3	25	14	2R	21129440
mago	2R:21129442	ThreePrimeUTR	AC	-	-	0.553569	0.731442	0	-	FBgn0002736	1	No	-	mago nashi (mago) encodes a protein that is part of the exon junction complex, which is required for post-transcriptional processes such as pre-mRNA splicing, RNA localization and nonsense-mediated decay. It is involved in germline development, germplasm assembly and photoreceptor differentiation.		3.46187	3.46022	0.901201	3.13284	3.19197	A	C	FALSE	14	91	16.5714	45.1429	0.077437	11	90	14.1111	33.4545	0.0996733	0.165431	0	43	13.1163	0	0	0	0	-0.177872	0.553569	0.731442	3	25	14	2R	21129442
mago	2R:21129462	ThreePrimeUTR	TA	-	-	0.585906	0.677961	0	-	FBgn0002736	1	No	-	mago nashi (mago) encodes a protein that is part of the exon junction complex, which is required for post-transcriptional processes such as pre-mRNA splicing, RNA localization and nonsense-mediated decay. It is involved in germline development, germplasm assembly and photoreceptor differentiation.		3.46187	3.46022	0.901201	3.13284	3.19197	T	A	FALSE	13	92	15.1413	41	0.0962663	12	89	12.573	32.25	0.104136	0.52203	0	43	12.9535	0	0	0	0	-0.0920546	0.585906	0.677961	1	25	13	2R	21129462
mago	2R:21129465	ThreePrimeUTR	CT	-	-	0.603575	0.665132	0	-	FBgn0002736	1	No	-	mago nashi (mago) encodes a protein that is part of the exon junction complex, which is required for post-transcriptional processes such as pre-mRNA splicing, RNA localization and nonsense-mediated decay. It is involved in germline development, germplasm assembly and photoreceptor differentiation.		3.46187	3.46022	0.901201	3.13284	3.19197	C	T	FALSE	13	92	15.4239	42.6923	0.0932166	12	89	13.0787	33.5833	0.108091	0.668898	0	43	13.0465	0	0	0	0	-0.0615566	0.603575	0.665132	1	25	13	2R	21129465
Magi	2R:21129465	ThreePrimeUTR	GA	-	-	0.603575	0.665132	0	-	FBgn0034590	-1	No	-	Magi (Magi) encodes a molecular scaffolding protein that is involved in adherens junction (AJ) organization. Magi is ubiquitously expressed and its product localizes at AJ with the Par polarity complex.		0.622251	0.366648	0.310436	0.557976	0.777484	C	T	FALSE	13	92	15.4239	42.6923	0.0932166	12	89	13.0787	33.5833	0.108091	0.668898	0	43	13.0465	0	0	0	0	-0.0615566	0.603575	0.665132	1	25	13	2R	21129465
Xbp1	2R:21143658	FivePrimeUTR	GA	-	-	0.633909	0.696217	0.444543	-	FBgn0021872	1	No	-	X box binding protein-1 (Xbp1) encodes a transcription factor that mediates the unfolded protein response. Xbp1 mRNA undergoes splicing after being cleaved by the product of Ire1, inducing the expression of ER quality control transcripts. Xbp1 mutants fail to develop beyond the 2nd instar larval stage, indicative of a requirement to resolve inherent ER stress during normal development.		6.37675	5.94381	0.755289	5.67561	5.11164	G	A	FALSE	31	74	39.0811	45.9355	0.0499089	23	78	24.6923	30.913	0.0609287	0.428999	6	37	17.4595	18.3333	0.0686869	0.118117	0.0548353	-0.0623082	-17.6994	-17.6371	8	54	25	2R	21143658
Xbp1	2R:21144020	CDS	GA	S	S	0.555518	0.608811	0.520448	Silent	FBgn0021872	1	No	-	X box binding protein-1 (Xbp1) encodes a transcription factor that mediates the unfolded protein response. Xbp1 mRNA undergoes splicing after being cleaved by the product of Ire1, inducing the expression of ER quality control transcripts. Xbp1 mutants fail to develop beyond the 2nd instar larval stage, indicative of a requirement to resolve inherent ER stress during normal development.	SSSGYASSSN	6.37675	5.94381	0.755289	5.67561	5.11164	G	A	FALSE	46	59	41.1525	57.2609	0.0373656	39	62	31.8065	57.4103	0.0473699	0.373547	11	32	17.125	24.0909	0.048413	0.66399	0.348224	-0.0532925	-23.5354	-23.4821	7	85	35	2R	21144020
Hmg-2	2R:21147451	CDS	GA	A	A	0.848026	0.974359	0.666667	Silent	FBgn0026582	1	No	-	High mobility group protein 2 (Hmg-2) encodes a member of the non-histone chromosomal high-mobility group protein family. These proteins associate with with chromatin and are ubiquitously distributed in the nucleus of eukaryotic cells. The product of Hmg-2 binds to DNA in a non-sequence specific fashion to induce structural changes in DNA that include bending and unwinding that in turn, promote D…	ALRKVDTSSL	0.973058	1.35278	0.654448	1.51983	1.32187	G	A	FALSE	10	95	7.91579	26.9	0.0865891	12	89	7.59551	48.9167	0.025641	0.146172	1	42	11.1429	12	0	0.543412	0.00673269	-0.126333	-11.152	-11.0256	-2	22	9	2R	21147451
Gyg	2R:21204704	CDS	CT	H	H	0.695275	0.730196	0.455382	Silent	FBgn0265191	1	No	Glyco_trans_8	Predicted to enable glycogenin glucosyltransferase activity. Predicted to be involved in glycogen biosynthetic process. Located in cytosol. Is expressed in several structures, including embryonic/larval muscle system; germ layer derivative; spermatozoon; trunk mesoderm; and visceral muscle primordium. Human ortholog(s) of this gene implicated in glycogen storage disease and glycogen storage disea…	HQLAVLVTPN	3.32483	2.63755	0.215336	4.33716	4.42205	C	T	FALSE	19	105	46.1714	41.7368	0.060129	7	101	24.6832	33.1429	0.120988	0.778563	8	43	82.2326	34.625	0.0375469	0.0201685	0.0387617	-0.0349207	-33.9297	-33.8948	12	26	11	2R	21204704
Gyg	2R:21204756	CDS	CT	M	M	0.694096	0.659515	0.441645	Silent	FBgn0265191	1	No	Glyco_trans_8	Predicted to enable glycogenin glucosyltransferase activity. Predicted to be involved in glycogen biosynthetic process. Located in cytosol. Is expressed in several structures, including embryonic/larval muscle system; germ layer derivative; spermatozoon; trunk mesoderm; and visceral muscle primordium. Human ortholog(s) of this gene implicated in glycogen storage disease and glycogen storage disea…	MKEVYNVVQE	3.32483	2.63755	0.215336	4.33716	4.42205	C	T	FALSE	17	105	44.2476	38.1176	0.0559604	7	101	23.6436	30.5714	0.115396	0.763947	7	43	80.3488	31	0.044592	0.0123265	0.103656	0.0345812	-30.3059	-30.3405	10	24	10	2R	21204756
Gyg	2R:21204833	CDS	GC	S	S	0.720782	0.660422	0.501509	Silent	FBgn0265191	1	No	Glyco_trans_8	Predicted to enable glycogenin glucosyltransferase activity. Predicted to be involved in glycogen biosynthetic process. Located in cytosol. Is expressed in several structures, including embryonic/larval muscle system; germ layer derivative; spermatozoon; trunk mesoderm; and visceral muscle primordium. Human ortholog(s) of this gene implicated in glycogen storage disease and glycogen storage disea…	SRPELGVTFT	3.32483	2.63755	0.215336	4.33716	4.42205	G	C	FALSE	18	105	46.7714	44.8333	0.0565157	9	101	24.9109	31.7778	0.100126	0.57569	9	43	85.6279	39.8889	0.02398	0.0134232	0.142261	0.0603601	-39.1681	-39.2285	9	27	9	2R	21204833
Gyg	2R:21204848	CDS	CT	G	G	0.69985	0.768761	0.453428	Silent	FBgn0265191	1	No	Glyco_trans_8	Predicted to enable glycogenin glucosyltransferase activity. Predicted to be involved in glycogen biosynthetic process. Located in cytosol. Is expressed in several structures, including embryonic/larval muscle system; germ layer derivative; spermatozoon; trunk mesoderm; and visceral muscle primordium. Human ortholog(s) of this gene implicated in glycogen storage disease and glycogen storage disea…	GVTFTKLHCW	3.32483	2.63755	0.215336	4.33716	4.42205	C	T	FALSE	15	105	45.9714	47.6667	0.0627593	8	101	24.2277	30.625	0.101585	0.549362	10	43	83.9767	33.4	0.0372483	0.00690616	0.00591551	-0.068911	-32.7002	-32.6312	7	23	5	2R	21204848
Gyg	2R:21205054	CDS	GT	S	S	0.642356	0.714461	0.507236	Silent	FBgn0265191	1	No	Glyco_trans_8	Predicted to enable glycogenin glucosyltransferase activity. Predicted to be involved in glycogen biosynthetic process. Located in cytosol. Is expressed in several structures, including embryonic/larval muscle system; germ layer derivative; spermatozoon; trunk mesoderm; and visceral muscle primordium. Human ortholog(s) of this gene implicated in glycogen storage disease and glycogen storage disea…	SAAPDVSWPD	3.32483	2.63755	0.215336	4.33716	4.42205	G	T	FALSE	21	105	47.3238	54.1429	0.0634931	13	101	24.9703	27.9231	0.089667	0.505641	13	43	83.4884	36.8462	0.037627	0.127295	0.043531	-0.0721046	-36.2038	-36.1317	8	34	8	2R	21205054
Gyg	2R:21205090	CDS	TC	N	N	0.683496	0.706564	0.499403	Silent	FBgn0265191	1	No	Glyco_trans_8	Predicted to enable glycogenin glucosyltransferase activity. Predicted to be involved in glycogen biosynthetic process. Located in cytosol. Is expressed in several structures, including embryonic/larval muscle system; germ layer derivative; spermatozoon; trunk mesoderm; and visceral muscle primordium. Human ortholog(s) of this gene implicated in glycogen storage disease and glycogen storage disea…	NSGVFVFKPS	3.32483	2.63755	0.215336	4.33716	4.42205	T	C	FALSE	17	105	47.2952	33.5294	0.0708942	8	101	25.0495	28.375	0.121527	0.863238	11	43	84.4884	32.8182	0.037403	0.0599385	0.0808765	-0.0230674	-32.1347	-32.1116	9	25	6	2R	21205090
Gyg	2R:21205147	CDS	TC	F	F	0.682968	0.738676	0.445174	Silent	FBgn0265191	1	No	Glyco_trans_8	Predicted to enable glycogenin glucosyltransferase activity. Predicted to be involved in glycogen biosynthetic process. Located in cytosol. Is expressed in several structures, including embryonic/larval muscle system; germ layer derivative; spermatozoon; trunk mesoderm; and visceral muscle primordium. Human ortholog(s) of this gene implicated in glycogen storage disease and glycogen storage disea…	FAVKNGSFDG	3.32483	2.63755	0.215336	4.33716	4.42205	T	C	FALSE	20	105	47.181	40.75	0.0579314	9	101	24.3861	26.3333	0.087588	0.598089	10	43	86.0465	34.3	0.0335325	0.00985983	0.00463226	-0.0557082	-33.617	-33.5613	11	29	10	2R	21205147
Gyg	2R:21205165	CDS	CT	S	S	0.592734	0.762541	0.433207	Silent	FBgn0265191	1	No	Glyco_trans_8	Predicted to enable glycogenin glucosyltransferase activity. Predicted to be involved in glycogen biosynthetic process. Located in cytosol. Is expressed in several structures, including embryonic/larval muscle system; germ layer derivative; spermatozoon; trunk mesoderm; and visceral muscle primordium. Human ortholog(s) of this gene implicated in glycogen storage disease and glycogen storage disea…	SFDGGDQGLL	3.32483	2.63755	0.215336	4.33716	4.42205	C	T	FALSE	17	105	46.6762	38.4706	0.062316	8	101	24.5743	28.125	0.0978671	0.145912	8	43	85.5581	38.5	0.0401504	0.109175	0.00762813	-0.169806	-37.9073	-37.7375	9	25	9	2R	21205165
Gyg	2R:21205391	CDS	TC	F	F	0.682836	0.6889	0.42848	Silent	FBgn0265191	1	No	Glyco_trans_8	Predicted to enable glycogenin glucosyltransferase activity. Predicted to be involved in glycogen biosynthetic process. Located in cytosol. Is expressed in several structures, including embryonic/larval muscle system; germ layer derivative; spermatozoon; trunk mesoderm; and visceral muscle primordium. Human ortholog(s) of this gene implicated in glycogen storage disease and glycogen storage disea…	FAGKLKPWLI	3.32483	2.63755	0.215336	4.33716	4.42205	T	C	FALSE	23	105	49.2095	51.2174	0.0547602	17	101	26.7327	29.6471	0.0694163	0.944961	11	43	86.9767	49.3636	0.0296786	0.00413028	0.00762846	-0.00606367	-48.6808	-48.6747	6	40	12	2R	21205391
Gyg	2R:21205460	CDS	GA	E	E	0.680309	0.594725	0.44367	Silent	FBgn0265191	1	No	-	Predicted to enable glycogenin glucosyltransferase activity. Predicted to be involved in glycogen biosynthetic process. Located in cytosol. Is expressed in several structures, including embryonic/larval muscle system; germ layer derivative; spermatozoon; trunk mesoderm; and visceral muscle primordium. Human ortholog(s) of this gene implicated in glycogen storage disease and glycogen storage disea…	EYAHAQDLIQ	3.32483	2.63755	0.215336	4.33716	4.42205	G	A	FALSE	18	105	49.4286	49.4444	0.0634942	12	101	26.802	26.3333	0.0916718	0.433936	13	43	89.7442	35.1538	0.0367844	0.00682645	0.128945	0.0855846	-34.4735	-34.5591	6	30	5	2R	21205460
Gyg	2R:21205479	CDS	TC	M	M	0.664213	0.698698	0.470316	Silent	FBgn0265191	1	No	-	Predicted to enable glycogenin glucosyltransferase activity. Predicted to be involved in glycogen biosynthetic process. Located in cytosol. Is expressed in several structures, including embryonic/larval muscle system; germ layer derivative; spermatozoon; trunk mesoderm; and visceral muscle primordium. Human ortholog(s) of this gene implicated in glycogen storage disease and glycogen storage disea…	MIQLWWNIFC	3.32483	2.63755	0.215336	4.33716	4.42205	T	C	FALSE	19	105	48.0476	42.4737	0.0651837	8	101	26	28.875	0.120908	0.788288	12	43	89.3953	34.1667	0.0516914	0.0438597	0.0654836	-0.0344853	-33.5025	-33.468	11	27	7	2R	21205479
Gyg	2R:21205488	CDS	CT	M	M	0.677616	0.688529	0.45668	Silent	FBgn0265191	1	No	-	Predicted to enable glycogenin glucosyltransferase activity. Predicted to be involved in glycogen biosynthetic process. Located in cytosol. Is expressed in several structures, including embryonic/larval muscle system; germ layer derivative; spermatozoon; trunk mesoderm; and visceral muscle primordium. Human ortholog(s) of this gene implicated in glycogen storage disease and glycogen storage disea…	MWWNIFCENV	3.32483	2.63755	0.215336	4.33716	4.42205	C	T	FALSE	19	105	47.5714	38.2105	0.0637219	7	101	25.7723	22.7143	0.143425	0.936454	11	43	87.814	29.1818	0.054441	0.0256789	0.0977997	-0.0109134	-28.5042	-28.4933	12	26	8	2R	21205488
Gyg	2R:21205499	CDS	CT	N	N	0.674598	0.762222	0.471933	Silent	FBgn0265191	1	No	-	Predicted to enable glycogenin glucosyltransferase activity. Predicted to be involved in glycogen biosynthetic process. Located in cytosol. Is expressed in several structures, including embryonic/larval muscle system; germ layer derivative; spermatozoon; trunk mesoderm; and visceral muscle primordium. Human ortholog(s) of this gene implicated in glycogen storage disease and glycogen storage disea…	NIFCENVIQS	3.32483	2.63755	0.215336	4.33716	4.42205	C	T	FALSE	20	105	47.8381	35	0.0613536	6	101	26.1584	24	0.150866	0.531825	12	43	89.2326	26.3333	0.0420844	0.0251738	0.027477	-0.0876241	-25.6587	-25.5711	14	26	8	2R	21205499
Gyg	2R:21205505	CDS	TC	F	F	0.667094	0.720909	0.436742	Silent	FBgn0265191	1	No	-	Predicted to enable glycogenin glucosyltransferase activity. Predicted to be involved in glycogen biosynthetic process. Located in cytosol. Is expressed in several structures, including embryonic/larval muscle system; germ layer derivative; spermatozoon; trunk mesoderm; and visceral muscle primordium. Human ortholog(s) of this gene implicated in glycogen storage disease and glycogen storage disea…	FCENVIQSLS	3.32483	2.63755	0.215336	4.33716	4.42205	T	C	FALSE	20	105	47.2857	33.25	0.0629616	5	101	26.1089	24.8	0.173679	0.725544	11	43	89.1395	26.3636	0.0342732	0.0150722	0.0371156	-0.0538152	-25.6965	-25.6427	15	25	9	2R	21205505
Gyg	2R:21206981	CDS	CT	H	H	0.732006	0.945082	0.346774	Silent	FBgn0265191	1	No	-	Predicted to enable glycogenin glucosyltransferase activity. Predicted to be involved in glycogen biosynthetic process. Located in cytosol. Is expressed in several structures, including embryonic/larval muscle system; germ layer derivative; spermatozoon; trunk mesoderm; and visceral muscle primordium. Human ortholog(s) of this gene implicated in glycogen storage disease and glycogen storage disea…	HLLHVRQFRD	3.32483	2.63755	0.215336	4.33716	4.42205	C	T	FALSE	12	105	51.6667	38.6667	0.0975857	6	101	35.7822	132.167	0.0274378	0.151326	2	43	89.186	22.5	0.153226	0.151919	0.000492843	-0.213075	-21.768	-21.5549	6	18	10	2R	21206981
Gyg	2R:21208789	ThreePrimeUTR	CG	-	-	0.695109	0.443258	0.372285	-	FBgn0265191	1	No	-	Predicted to enable glycogenin glucosyltransferase activity. Predicted to be involved in glycogen biosynthetic process. Located in cytosol. Is expressed in several structures, including embryonic/larval muscle system; germ layer derivative; spermatozoon; trunk mesoderm; and visceral muscle primordium. Human ortholog(s) of this gene implicated in glycogen storage disease and glycogen storage disea…		3.32483	2.63755	0.215336	4.33716	4.42205	C	G	FALSE	10	105	45.9143	40.3	0.0711559	10	101	27.1782	28.8	0.0692065	0.0206417	12	43	90.5814	42.5	0.0226401	0.00015049	0.306386	0.251851	-41.8049	-42.0567	0	20	-2	2R	21208789
Gyg	2R:21209437	ThreePrimeUTR	AC	-	-	0.654539	0.645916	0.446156	-	FBgn0265191	1	No	-	Predicted to enable glycogenin glucosyltransferase activity. Predicted to be involved in glycogen biosynthetic process. Located in cytosol. Is expressed in several structures, including embryonic/larval muscle system; germ layer derivative; spermatozoon; trunk mesoderm; and visceral muscle primordium. Human ortholog(s) of this gene implicated in glycogen storage disease and glycogen storage disea…		3.32483	2.63755	0.215336	4.33716	4.42205	A	C	FALSE	12	105	51.7143	56.4167	0.090683	15	101	29.6733	40.4	0.0711504	0.940069	18	43	101.023	44.3889	0.0296142	0.0168066	0.00968642	0.00862262	-43.7344	-43.743	-3	27	-6	2R	21209437
Gyg	2R:21209443	ThreePrimeUTR	CT	-	-	0.666699	0.62716	0.437202	-	FBgn0265191	1	No	-	Predicted to enable glycogenin glucosyltransferase activity. Predicted to be involved in glycogen biosynthetic process. Located in cytosol. Is expressed in several structures, including embryonic/larval muscle system; germ layer derivative; spermatozoon; trunk mesoderm; and visceral muscle primordium. Human ortholog(s) of this gene implicated in glycogen storage disease and glycogen storage disea…		3.32483	2.63755	0.215336	4.33716	4.42205	C	T	FALSE	13	105	52.8286	54.6923	0.0809219	17	101	30.4158	38.6471	0.0659282	0.704958	18	43	102.558	46.8889	0.0203873	0.00359991	0.00806894	0.0395398	-46.2222	-46.2617	-4	30	-5	2R	21209443
CG44245	2R:21211826	CDS	GA	E	E	0.630004	0.965961	0.598803	Silent	FBgn0265180	1	No	-	Involved in mesoderm development. Is expressed in adult head; adult heart; and spermatozoon.	ENNRTVRKNS	4.99076	3.81368	0.0254466	6.55123	7.5599	G	A	FALSE	28	77	32.2078	151.071	0.0473169	33	68	8.33824	70.8485	0.0158373	1.3487e-09	28	15	105.933	160.036	0.0432116	0.628298	8.57704e-12	-0.335958	-159.406	-159.07	-5	61	0	2R	21211826
CG44245	2R:21211985	CDS	TG	S	S	0.623293	0.955585	0.603752	Silent	FBgn0265180	1	No	-	Involved in mesoderm development. Is expressed in adult head; adult heart; and spermatozoon.	SVASKRVPGG	4.99076	3.81368	0.0254466	6.55123	7.5599	T	G	FALSE	29	76	33.5526	155.517	0.0497767	30	71	8.84507	73.2667	0.0180464	3.69279e-08	28	15	96.0667	148.429	0.0380911	0.757567	1.05158e-11	-0.332292	-147.805	-147.473	-1	59	1	2R	21211985
CG44245	2R:21212006	CDS	CG	P	P	0.635109	0.959343	0.593784	Silent	FBgn0265180	1	No	-	Involved in mesoderm development. Is expressed in adult head; adult heart; and spermatozoon.	PGGVEYTYST	4.99076	3.81368	0.0254466	6.55123	7.5599	C	G	FALSE	29	76	34.7105	160.69	0.0483118	31	70	9.44286	77.1613	0.0162257	1.77082e-08	28	15	108.667	155.179	0.039788	0.513391	3.0823e-12	-0.324234	-154.543	-154.219	-2	60	1	2R	21212006
[truncated: 707 more rows]
[truncated: 16 more columns]
