# Supplementary material for: A stochastic RNA editing process targets a select number of sites in individual Drosophila glutamatergic motoneurons
Source: bioRxiv preprint, doi:10.1101/2024.05.17.594696, version 2 (2025-07-01)
Supplement: Supplemental Table 8 [file 594696_file10.xlsx]

## Sheet: Canonical edits
					Single-cell Patchseq			Compiled Averages																		gDNA SNP check							Larval Motoneurons OK6>mCherry-NLS, empty (Cypranowska et al. Biorxiv 2024)
Gene	Edit Position	GenePart	BiologicalBaseChange		Mean Ib editing	Mean Is editing		Larval Motoneurons (Cypranowska et al. Biorxiv 2024)		Larval Motoneurons, Rbp RNAi (Cypranowska et al. Biorxiv 2024)		Larval Motoneurons, Unc13 RNAi (Cypranowska et al. Biorxiv 2024)		Adult Neurons elav-Gal4 nuclei (Sapiro et al. PNAS 2019)		Adult Fly Head Mature RNA time points aggregated (Rodriguez et al. Mol Cell 2012)		Adult Fly Head Nascent RNA time points aggregated (Rodriguez et al. Mol Cell 2012)		Adult Fly Head Nascent RNA YW (Rodriguez et al. Mol Cell 2012)		Adult Fly Head Nascent RNA FM7a (Rodriguez et al. Mol Cell 2012)		Adult Fly Head Nascent RNA ADAR0 (Rodriguez et al. Mol Cell 2012)		Adult Fly Head gDNA (Rodriguez et al. Mol Cell 2012)							Rep1 REF	Rep1 ALT	Prop Edit	Rep2 REF	Rep2 ALT	Prop Edit	Rep3 REF	Rep3 ALT	Prop Edit	Rep4 REF	Rep4 ALT	Prop Edit	Rep5 REF	Rep5 ALT	Prop Edit	Rep6 REF	Rep6 ALT
Act5C	X:5903532	CDS	AG		0	0		0.00242774		0.00293383		0.00439843		0		0.00122674		0.00786048		0.00340136		0		0.00670584		N							35943	104	0.00288512	26359	80	0.00302583	20963	49	0.002332	19781	34	0.00171587	9638	23	0.00238071	8513	19
Ank2	3L:7666636	CDS	AG		0.28149	0.393125		0.0514957		0.124138		0.0833333		0.367557		0.258214		0.416845		0.34347		0.307323		0.00617284		N							9	1	0.1	9	1	0.1	3	0	0	55	5	0.0833333	68	0	0	38	1
Ank2	3L:7681141	CDS	AG		0.395368	0.327174		0.0495963		0.111608		0.192867		0.0287952		0		0.000198886		0		0		0.00052521		N							118	16	0.119403	60	0	0	50	4	0.0740741	419	4	0.00945626	477	19	0.0383065	134	8
Atpalpha	3R:20964328	CDS	AG		0.1635	0.258965		0.0461804		0.0493727		0.0490015		0.11462		0.255727		0.227443		0.191617		0.16479		0.00511712		N							4710	204	0.041514	4583	231	0.047985	3639	151	0.0398417	2890	174	0.0567885	1509	76	0.0479495	1402	63
Atpalpha	3R:20965039	CDS	AG		0.181504	0.175146		0.448264		0.0608792		0.0939212		No Reads		No Reads		0.257747		0.219306		0.192124		0.00417609		N							52	39	0.428571	14	32	0.695652	0	181	1	110		0	355	79	0.182028	74	46
bbc	2R:13494406	CDS	AG		0.875242	0.913293		0.423892		0.424384		0.554174		No Reads		0.5		0		0.00980392		0		0		N							20	23	0.534884	27	30	0.526316	34	5	0.128205	24	33	0.578947	55	33	0.375	21	14
beag	3R:9063537	CDS	AG		0.722222	0.574408		0		0		0.0138889		0		0		0		0		0		0		N							12	0	0	14	0	0	15	0	0	67	0	0	54	0	0	20	0
betaTub56D	2R:19447593	CDS	AG		0.249274	0.189783		0.0040047		0.0028033		0.00440223		0.0123457		0.000865052		0		0		0		0		N							26805	67	0.0024933	24142	85	0.00350848	19269	55	0.0028462	32758	132	0.00401338	15571	58	0.00371105	17173	129
betaTub97EF	3R:27967290	CDS	AG		0.596644	0.785258		0.970882		0.992908		0.985507		0		0		0		0		0.0416667		0		N							0	55	1	0	52	1	0	52	1	0	76	1	4	34	0.894737	5	67
betaTub97EF	3R:27967292	CDS	AG		0.599171	0.777528		0.970882		1		0.985507		0		0.00641026		0		0		0		0		N							0	55	1	0	52	1	0	52	1	0	76	1	4	34	0.894737	5	67
bigmax	3R:27287902	CDS	AG		0.851957	0.911847		0.708671		0.362786		0.623932		No Reads		0.605263		0.353409		0		1		1		8A, 4G							7	22	0.758621	7	8	0.533333	3	2	0.4	2	25	0.925926	15	26	0.634146	0	7
bonsai	2R:22638356	CDS	AG		0.492668	0.479016		0.00387597		0		0.00628931		No Reads		0		0		0		0		0		N							42	1	0.0232558	34	0	0	18	0	0	61	0	0	114	0	0	62	0
bsk	2L:10248292	CDS	AG		0.345085	0.299891		0.00196418		0.00114833		0.00294173		0		0		0		0		0		0		N							838	3	0.00356718	750	1	0.00133156	492	1	0.0020284	809	1	0.00123457	751	1	0.00132979	435	1
bug	2R:15935345	CDS	AG		0.718929	0.89729		0		0		0		No Reads		0.5		No Reads		1		0		0		0A 8G							7	0	0	7	0	0	14	0	0	44	0	0	58	0	0	19	0
cac	X:11971853	CDS	AG		0.861993	0.915414		0.693341		0.706061		0.569444		0.796424		0.589286		0.684913		0.801339		0.661059		0.00649351		N							9	15	0.625	12	9	0.428571	0	7	1	31	44	0.586667	4	41	0.911111	9	14
cac	X:11977538	CDS	AG		0.914185	0.828415		0.57524		0.714525		0.584343		0.703801		0.77381		0.742951		0.630952		0.572737		0		N							34	49	0.590361	17	45	0.725806	27	31	0.534483	73	81	0.525974	130	157	0.547038	17	19
CalpB	3L:9892134	CDS	AG		0.992593	0.93989		0.8986		0.908201		0.977778		0.805556		0.29329		0.494444		0.111111		0.572917		0		N							3	21	0.875	1	18	0.947368	1	4	0.8	0	16	1	0	43	1	3	10
CCT6	X:15747380	CDS	AG		0.644504	0.626376		0.000849134		0.000475511		0		No Reads		0.0131579		0		0		1		0		N							365	0	0	278	1	0.00358423	213	0	0	661	1	0.00151057	476	0	0	290	0
Cdc50	X:16441177	CDS	AG		0.736976	0.688619		0		0		0		0		0		0		0		0		0		N							108	0	0	142	0	0	130	0	0	187	0	0	145	0	0	124	0
CG1090	3R:4365385	CDS	AG		0.772573	0.834649		0.616173		0.673451		0.59263		0.838325		0.876363		0.817075		0.855509		0.826389		0		N							72	72	0.5	29	39	0.573529	20	39	0.661017	190	238	0.556075	51	325	0.864362	49	58
CG1090	3R:4365474	CDS	AG		0.480964	0.467616		0.181883		0.204573		0.124702		0.374959		0.513038		0.390203		0.313725		0.255319		0		N							98	25	0.203252	73	11	0.130952	47	14	0.229508	286	64	0.182857	387	74	0.160521	93	21
CG1265	3L:4255132	CDS	AG		0.190686	0.390479		0.0237996		0.00374072		0.00852725		No Reads		0		0		0		0		0		N							118	1	0.00840336	101	2	0.0194175	109	4	0.0353982	235	6	0.0248963	203	6	0.0287081	150	4
CG13506	2R:22391510	CDS	AG		0.584513	0.613057		No Reads		0.348148		0.480128		No Reads		0.503125		0.558482		0.494652		0.440476		0		N							5	0	0	5	2	0.285714	2	5	0.714286	19	5	0.208333	9	5	0.357143	0	0
CG14591	2R:6037128	CDS	AG		0.767224	0.684672		0.00607936		0.00153257		0		0.672619		0.058422		0.077381		0.330882		0		0		10A 3G							36	1	0.027027	266	0	0	160	0	0	531	0	0	470	1	0.00212314	271	2
CG14764	2R:7954006	CDS	AG		0.861688	0.806906		0.00641026		0.00952381		0		0		0.335317		0.607488		0.5		0		0		6A 4G							25	1	0.0384615	43	0	0	28	0	0	105	0	0	53	0	0	41	0
CG1532	X:21027802	CDS	AG		0.60126	0.863755		0.790812		0.531945		0.891775		0.916667		0.5		1		1		1		1		0A 12G							4	24	0.857143	2	18	0.9	39	34	0.465753	32	80	0.714286	5	21	0.807692	0	1
CG16974	2L:13189312	CDS	AG		0.601675	0.634073		0.514371		0.59455		0.535445		No Reads		0.756334		0.559954		0.585824		0.402132		0.0338983		N							34	24	0.413793	38	36	0.486486	22	22	0.5	22	20	0.47619	12	18	0.6	16	25
CG1902	2R:9604115	CDS	AG		0.749994	0.759928		0.00222222		0		0		No Reads		0.464286		0.78125		0.8125		0		0		3A 4G							144	0	0	99	0	0	53	0	0	140	0	0	98	0	0	74	1
CG1983	3R:30176517	CDS	AG		0.699746	0.727115		0.424972		0.38973		0.307359		0.5		0.0763889		0.508333		No Reads		0		0		4A 3G							43	28	0.394366	29	19	0.395833	23	25	0.520833	97	51	0.344595	115	94	0.449761	30	24
CG1983	3R:30176862	CDS	AG		0.730036	0.779217		0.431719		0.452311		0.352684		No Reads		0.03125		0.177083		0		0		0		13A 11G							66	32	0.326531	22	22	0.5	12	22	0.647059	79	63	0.443662	122	93	0.432558	60	19
CG2765	2R:24961078	CDS	AG		0.889219	0.792135		0.00490196		0		0		0		0.189327		0.361797		0.420833		0		0		7A 5G							40	0	0	33	1	0.0294118	34	0	0	45	0	0	67	0	0	19	0
CG31140	3R:23976395	CDS	AG		0.754056	0.839689		0.000816993		0.00113766		0		0		0		0		0		0.99569		0.995283		N							521	0	0	406	2	0.00490196	281	0	0	334	0	0	453	0	0	208	0
CG31650	2L:5042598	CDS	AG		0.700913	0		0		0.00248756		0		0		0		0.025		0		0		0		N							84	0	0	66	0	0	62	0	0	280	0	0	166	0	0	75	0
CG31705	2L:11523838	CDS	AG		0.723302	0.765134		0.0123457		0		0		No Reads		0.498134		1		1		0.265833		0.0625		1A 7G							25	2	0.0740741	20	0	0	16	0	0	118	0	0	222	0	0	21	0
CG31705	2L:11525232	CDS	AG		0.726397	0.761163		0.0238095		0		0		0		0.465227		0.971262		0.957971		0		0		0A 10G							9	0	0	9	0	0	4	0	0	41	0	0	56	0	0	6	1
CG31705	2L:11525642	CDS	AG		0.514588	0.772583		0		0		0		0		0.474739		0.950516		0.960684		0		0.0113636		1A 8G							9	0	0	5	0	0	15	0	0	18	0	0	23	0	0	3	0
CG32264	3L:3717400	CDS	AG		0.607402	0.478289		0.00268105		0.00149477		0		0		0		0		0		0		0		N							113	0	0	152	0	0	94	1	0.0105263	396	0	0	455	1	0.00219298	296	1
CG33303	2L:10374727	CDS	AG		0.680149	0.727122		0.433907		0.435819		0.406002		No Reads		1		0.964286		1		0.666667		1		0A 11G							175	127	0.42053	154	95	0.381526	92	67	0.421384	327	207	0.38764	142	148	0.510345	72	67
CG33303	2L:10374859	CDS	AG		0.656279	0.724668		0.477389		0.446468		0.466465		No Reads		0.966667		No Reads		1		1		0.75		0A 12G							128	94	0.423423	105	84	0.444444	62	60	0.491803	230	146	0.388298	77	117	0.603093	55	58
CG42613	3R:18969789	CDS	AG		0.574248	0.472466		0.023938		0.0390469		0.126984		0		No Reads		0		0		0.0108696		0		N							64	1	0.0153846	56	0	0	38	3	0.0731707	36	0	0	45	1	0.0217391	29	1
CG4502	2L:7196654	CDS	AG		0.734916	0		0.5841		0.556457		0.608094		0		0.5		1		0.9		1		1		0A 11G							123	182	0.596721	84	135	0.616438	141	95	0.402542	217	379	0.635906	129	249	0.65873	99	145
CG4678	X:16709555	CDS	AG		0.808127	1		0		0.00127714		0		No Reads		0		0.0227273		0		0.96875		0		N							111	0	0	73	0	0	60	0	0	297	0	0	184	0	0	137	0
CG8405	2R:16048343	CDS	AG		0.712891	0.718571		0		0.0277778		No Reads		0		0.5		1		1		0		0		0A 14G							15	0	0	17	0	0	18	0	0	24	0	0	28	0	0	15	0
CG9727	3R:6455990	CDS	AG		0.759628	0.864068		0.343849		0.133333		No Reads		No Reads		0.18961		0.213203		0.225845		0.125906		0		N							3	6	0.666667	7	8	0.533333	13	1	0.0714286	19	1	0.05	27	13	0.325	7	5
CG9743	3R:30198612	CDS	AG		0.762837	0.551336		0.558688		0.479091		0.456227		No Reads		0.333333		0.770833		0.535714		0		0		7A 7G							5	9	0.642857	2	7	0.777778	2	3	0.6	20	24	0.545455	70	41	0.369369	14	10
CG9917	X:16322300	CDS	AG		0.954545	0.793882		0		0		0		No Reads		0.00462963		0		0		0		0		N							73	0	0	69	0	0	70	0	0	175	0	0	147	0	0	73	0
CG9917	X:16322744	CDS	AG		0.843596	0.800784		0		0.876706		0.754905		No Reads		0.00462963		0		0		0		0		N							73	0	0	69	0	0	70	0	0	175	0	0	147	0	0	73	0
CG9917	X:16322825	CDS	AG		0.90361	0.786847		0.825254		0.887185		0.803893		0.5		0		0		0		0		0		N							10	18	0.642857	10	30	0.75	14	53	0.791045	7	83	0.922222	4	98	0.960784	3	23
Ciz1	3L:9867339	CDS	AG		0.776338	0.618657		0.216458		0.286477		0.179381		0.355556		0.632939		0.444371		0.483516		0.136364		0		N							123	44	0.263473	158	21	0.117318	109	25	0.186567	212	45	0.175097	162	87	0.349398	92	24
cm	X:7010059	CDS	AG		0.890065	0.774648		0.997396		0.995261		1		1		1		1		1		0		1		0A 7G							0	46	1	0	37	1	0	24	1	0	53	1	1	63	0.984375	0	31
Cnep1r2	3L:10639369	CDS	AG		0.537868	0.278805		0.0176159		0.0148644		0.015873		0		0		0		No Reads		No Reads		No Reads		N							26	0	0	17	1	0.0555556	21	0	0	116	0	0	117	2	0.0168067	87	3
Cnx99A	3R:29316804	CDS	AG		0.563871	0.635426		0.00221129		0.00112455		0.00102564		0		0.504902		1		1		0.679293		0.485994		0A 15G							457	1	0.00218341	461	0	0	323	1	0.00308642	1152	3	0.0025974	668	2	0.00298507	413	1
Cnx99A	3R:29316843	CDS	AG		0.614442	0.647534		0.00201408		0.00172042		0		0		0.5		1		1		0.803922		0.552083		0A 16G							492	1	0.0020284	471	0	0	360	1	0.00277008	1093	5	0.00455373	704	0	0	365	1
Cox17	X:15084514	CDS	AG		0.723772	0.647597		0		0		0		0		0		0		No Reads		0		1		N							130	0	0	78	0	0	113	0	0	432	0	0	266	0	0	173	0
cpx	3R:4297504	CDS	AG		0.483528	0.463191		0.378727		0.448887		0.388246		0.487434		0.366625		0.460065		0.451574		0.610672		0		N							2040	1066	0.343207	1538	847	0.355136	1380	762	0.355742	3108	2026	0.394624	1601	1275	0.443324	1279	785
cpx	3R:4297517	CDS	AG		0.232208	0.167149		0.0725092		0.0833215		0.0668306		0.318115		0.169441		0.187418		0.229853		0.239111		0		N							2780	210	0.0702341	2176	152	0.0652921	1870	182	0.088694	4579	391	0.078672	2632	195	0.0689777	1794	121
cpx	3R:4297518	CDS	AG		0.282861	0.255625		0.168303		0.195978		0.180569		0.318115		0.283021		0.308646		0.306229		0.367499		0		N							2630	501	0.160013	2043	378	0.156134	1767	371	0.173527	4164	979	0.190356	2513	451	0.152159	1625	351
CSN4	2R:7973697	CDS	AG		0.747552	0.755802		0.00137741		0		0		0		0.311966		No Reads		No Reads		0		0		6A 8G							28	0	0	31	0	0	41	0	0	72	0	0	120	1	0.00826446	73	0
CycG	3R:31601551	CDS	AG		0.552903	0.651481		0.494849		0.47028		0.502102		No Reads		0		0		0		0.275146		0.414309		N							470	455	0.491892	477	473	0.497895	307	263	0.461404	593	494	0.454462	299	349	0.53858	172	190
CycG	3R:31601718	CDS	AG		0.348393	0.476545		0.114857		0.15304		0.111196		0		0.277313		0.263899		0.107615		0.123299		0		N							764	109	0.124857	830	130	0.135417	551	58	0.0952381	917	60	0.0614125	479	112	0.189509	366	33
CycG	3R:31601828	CDS	AG		0.376426	0.505453		0.016513		0.0262385		0.0194364		0		0.2144		0.234784		0.145085		0.0944357		0.0714981		N							977	19	0.0190763	996	26	0.0254403	605	14	0.0226171	924	5	0.00538213	512	9	0.0172745	320	3
Diap2	2R:15932857	CDS	AG		0.888185	0.883503		0.997119		1		1		1		1		1		1		1		1		0A 7G							0	96	1	0	57	1	0	65	1	1	190	0.994764	1	82	0.987952	0	32
Diap2	2R:15932884	CDS	AG		0.887314	0.855556		1		1		1		1		1		1		1		1		1		0A 8G							0	93	1	0	59	1	0	67	1	0	166	1	0	72	1	0	26
Diap2	2R:15933013	CDS	AG		0.881901	0.791868		0.998106		1		1		1		1		No Reads		1		1		0.95		0A 13G							1	87	0.988636	0	61	1	0	55	1	0	158	1	0	82	1	0	39
Drep3	2R:12062006	CDS	AG		0.735876	0.550024		0.52231		0.441604		0.544444		0		0.5		0		No Reads		0.5		0.55		N							236	269	0.532673	231	271	0.539841	223	242	0.52043	374	434	0.537129	359	403	0.528871	157	142
Drice	3R:29800350	CDS	AG		0.600671	0.811625		0.601685		0.473765		0.247863		No Reads		1		1		1		0.03125		0.0714286		0A 9G							8	11	0.578947	13	16	0.551724	4	7	0.636364	19	10	0.344828	14	24	0.631579	2	13
eIF4EHP	3R:24106936	CDS	AG		0.721103	0.856435		0.474316		0.425463		0.626667		0		0		0		0		0		0		N							22	18	0.45	24	7	0.225806	23	18	0.439024	19	42	0.688525	34	87	0.719008	23	11
EMC7	2R:16016880	CDS	AG		0.735204	0.678917		0.00289037		0		0		No Reads		0.5		1		1		0		0		0A 9G							85	1	0.0116279	70	0	0	91	0	0	174	1	0.00571429	90	0	0	73	0
EMC7	2R:16016882	CDS	AG		0.73369	0.675995		0.00340136		0.00229095		0		No Reads		0.5		1		1		0		0		0A 9G							92	0	0	74	0	0	96	0	0	188	0	0	96	2	0.0204082	77	0
EndoA	3R:18907652	CDS	AG		0.63121	0.671189		0.353497		0.398593		0.398779		No Reads		0.727298		0.503395		0.569338		0.618816		0.00581395		N							252	124	0.329787	220	140	0.388889	170	97	0.363296	183	92	0.334545	167	112	0.401434	69	30
EndoA	3R:18907675	CDS	AG		0.558424	0.571		0.279762		0.309971		0.293098		No Reads		0.668323		0.532658		0.542096		0.597685		0.005		N							218	95	0.303514	232	72	0.236842	181	55	0.233051	183	66	0.26506	174	77	0.306773	64	32
EndoA	3R:18907799	CDS	AG		0.620694	0.440731		0.0505494		0.0731156		0.0720237		No Reads		0.294664		0.218172		0.314815		0.258333		0		N							376	34	0.0829268	365	40	0.0987654	289	26	0.0825397	273	7	0.025	312	1	0.00319489	91	1
Etfb	3R:29801970	CDS	AG		0.530823	0.68901		0.49584		0.431657		0.490687		No Reads		0.5		1		1		0		0.1		0A 8G							25	22	0.468085	22	27	0.55102	15	17	0.53125	57	18	0.24	26	59	0.694118	27	26
Etfb	3R:29802318	CDS	AG		0.715864	0.697713		0.00241546		0		0		0		0.277337		0.623291		0.638636		0		0		2A 3G							37	0	0	40	0	0	34	0	0	48	0	0	92	0	0	68	1
Frq1	X:18170126	CDS	AG		0.250757	0.22253		0.535585		0.59983		0.609333		0.547746		0.733824		0.527778		0.25		0.166667		0		N							157	237	0.601523	163	135	0.45302	133	144	0.519856	433	496	0.533907	335	297	0.469937	151	263
futsch	X:1443927	CDS	AG		1	0.996104		0.863258		0.916667		1		1		No Reads		0.0142857		0.0188291		0.989538		0.0168325		N							1	21	0.954545	1	3	0.75	2	3	0.6	4	28	0.875	0	23	1	0	11
Gar1	2R:21096562	CDS	AG		0.695471	0.793914		0.648247		0.619608		0.646377		No Reads		1		No Reads		1		1		1		0A 17G							3	13	0.8125	1	2	0.666667	2	7	0.777778	37	35	0.486111	17	23	0.575	15	20
Gbs-76A	3L:19283264	CDS	AG		0.804347	0.978723		0.61044		0.724385		0.631969		0.434343		0.5171		0.586462		0.646154		0.367647		0		N							20	45	0.692308	28	39	0.58209	13	23	0.638889	28	81	0.743119	62	36	0.367347	13	23
gkt	2L:3160690	CDS	AG		0.886456	0.964646		0		0		0		No Reads		0		No Reads		0		0		0		N							35	0	0	36	0	0	19	0	0	160	0	0	134	0	0	27	0
GLS	2R:12671884	CDS	AG		0.795921	0.815591		0.995317		0.997494		1		0		0.0555556		0.176984		0.142633		0.0277778		0		5A 1G							1	68	0.985507	0	40	1	0	28	1	0	145	1	2	145	0.986395	0	69
Got1	2R:16141326	CDS	AG		0.53662	0.176471		0.467731		0.489623		0.481895		0		0.496951		0		0		1		1		N							108	118	0.522124	133	71	0.348039	95	68	0.417178	145	149	0.506803	129	167	0.564189	85	69
Gp93	3R:27951705	CDS	AG		0.64165	0.713294		0		0.000706215		0.00161031		0		0.5		1		1		0		0		0A 12G							284	0	0	242	0	0	218	0	0	548	0	0	653	0	0	209	0
Hmu	3R:27290230	CDS	AG		0.651957	0.59646		0.00466227		0.00457989		0.00152207		No Reads		0.55871		0.239683		0.144481		1		1		8A 4G							487	2	0.00408998	294	3	0.010101	221	0	0	796	6	0.0074813	605	1	0.00165017	214	1
Hr78	3L:21494397	CDS	AG		0.749415	0.644147		0.0719965		0.0707283		0.145098		0		0		0		0		0		0		N							25	0	0	24	0	0	16	1	0.0588235	54	6	0.1	81	10	0.10989	41	8
Hydr2	2L:3167771	CDS	AG		0.893543	0.961039		0		0.00443676		0		No Reads		0		0		0		0		0		N							125	0	0	126	0	0	53	0	0	201	0	0	173	0	0	81	0
Iswi	2R:12640166	CDS	AG		0.831548	0.834367		0.447052		0.423221		0.43464		0.0238095		0.113095		0.6		0		0.285714		0.566667		14A 4G							15	21	0.583333	21	17	0.447368	13	11	0.458333	75	54	0.418605	60	35	0.368421	38	26
kay	3R:29792043	CDS	AG		0.773814	0.712185		0.394854		0.544338		0.529915		No Reads		0.798821		0.550272		0.70931		0.0952381		0.0997268		3A 5G							22	11	0.333333	24	23	0.489362	18	13	0.419355	88	43	0.328244	28	17	0.377778	22	16
lap	3R:7192775	CDS	AG		0.878118	0.94697		0.600925		0.658118		0.747835		0.958333		0.822659		0.7747		0.791304		0.638889		0		N							25	32	0.561404	24	25	0.510204	13	19	0.59375	49	127	0.721591	66	155	0.701357	42	45
LSm1	2R:21170134	CDS	AG		0.751307	0.633826		0		0		0		0		0.5		1		1		No Reads		0		0A 10G							15	0	0	9	0	0	6	0	0	35	0	0	50	0	0	23	0
LSm3	3R:23996648	CDS	AG		0.833086	0.63765		0.53573		0.520055		0.605829		No Reads		0.5		1		No Reads		1		1		0A 14G							16	23	0.589744	21	20	0.487805	15	21	0.583333	49	43	0.467391	36	27	0.428571	25	48
mago	2R:21128756	CDS	AG		0.631823	0.82008		0		0		0		No Reads		0.5		1		No Reads		0		0		0A 9G							35	0	0	99	0	0	45	0	0	86	0	0	90	0	0	84	0
mago	2R:21128870	CDS	AG		0.621186	0.763147		0		0		0		0		0.5		1		No Reads		0		0		0A 5G							44	0	0	67	0	0	39	0	0	99	0	0	92	0	0	104	0
mago	2R:21128873	CDS	AG		0.598647	0.755685		0		0		0		0		0.5		1		No Reads		0		0		0A 6G							45	0	0	62	0	0	40	0	0	102	0	0	92	0	0	112	0
mago	2R:21128882	CDS	AG		0.637452	0.758105		0		0		0		0		0.5		1		No Reads		0		No Reads		0A 6G							47	0	0	67	0	0	42	0	0	99	0	0	99	0	0	107	0
MED9	2R:18167781	CDS	AG		0.64104	0.73232		0.502227		0.481199		0.438003		0		0.5		0		0		0		0		N							28	41	0.594203	46	32	0.410256	30	28	0.482759	115	109	0.486607	50	76	0.603175	31	24
MICU1	2L:7185163	CDS	AG		0.81423	0.959746		0.583763		0.479598		0.460317		1		0.5		0		0		0		0		N							12	8	0.4	6	17	0.73913	8	5	0.384615	18	25	0.581395	17	61	0.782051	5	8
MICU1	2L:7185175	CDS	AG		0.828675	0.939059		0.588663		0.461902		0.323033		1		0.5		0		0		0		0		N							12	8	0.4	6	17	0.73913	8	5	0.384615	21	27	0.5625	18	55	0.753425	4	9
mmd	X:15958587	CDS	AG		0.876307	0.722592		0.615245		0.635152		0.851852		0.780662		0.779718		0.723317		0.8		0.833333		0		N							3	6	0.666667	5	11	0.6875	9	11	0.55	36	48	0.571429	32	58	0.644444	15	20
Mnr	X:21205767	CDS	AG		0.665523	0.655826		1		1		1		0.550292		0.998106		0.986842		1		0		1		0A 7G							0	10	1	0	7	1	0	18	1	0	39	1	0	77	1	0	47
mRpL32	3R:31253063	CDS	AG		0.51744	0.933759		0		0		0		No Reads		0		No Reads		No Reads		0		0		N							19	0	0	28	0	0	12	0	0	86	0	0	52	0	0	37	0
mRpS16	2R:14173081	CDS	AG		0.631393	0.785402		0.25639		0.387597		0.591892		0.166667		0.5		No Reads		No Reads		No Reads		0		0A 11G							14	3	0.176471	23	11	0.323529	15	8	0.347826	50	13	0.206349	45	20	0.307692	28	6
Msp300	2L:5164694	CDS	AG		0.556485	0.517616		0.202655		0.172386		0.137255		0.187598		No Reads		0.2817		0.18422		0.16629		0		N							5	2	0.285714	6	1	0.142857	12	2	0.142857	29	3	0.09375	45	31	0.407895	36	6
Msp300	2L:5164718	CDS	AG		0.506029	0.293206		0.0959456		0.389731		0.125641		0.112292		No Reads		0.125017		0.103278		0.0986927		0		N							7	0	0	5	1	0.166667	16	1	0.0588235	33	2	0.0571429	70	8	0.102564	34	8
Msp300	2L:5166158	CDS	AG		0.25	0.292848		0.0260111		0.0108548		0.0185988		0.00438499		0		0.000403877		0.00684932		0.00609756		0.00175439		N							292	10	0.0331126	273	12	0.0421053	292	8	0.0266667	812	10	0.0121655	787	0	0	228	10
muc	2L:7429847	CDS	AG		0.396114	0.617664		0.008552		0.00464354		0.003367		0		0.00316456		0.025		0		0		0		N							183	0	0	127	3	0.0230769	144	1	0.00689655	494	7	0.0139721	539	4	0.00736648	157	0
nAChRalpha5	2L:14083516	CDS	AG		1	0.951461		0.769505		0.761567		0.669014		0.671354		0.8025		0.855734		0.541667		0.555556		0		N							4	37	0.902439	17	27	0.613636	4	14	0.777778	45	158	0.778325	50	143	0.740933	20	82
nAChRalpha5	2L:14083517	CDS	AG		1	0.940904		0.814359		0.829367		0.806723		0.69884		0.8475		0.851274		0.541667		0.673611		0		N							5	36	0.878049	13	30	0.697674	1	16	0.941176	46	159	0.77561	40	152	0.791667	20	81
nAChRalpha5	2L:14089204	CDS	AG		0.995265	0.957226		0.915613		0.951049		0.981481		0.850205		0.889773		0.882173		0.5		1		0		N							1	44	0.977778	0	57	1	7	30	0.810811	25	251	0.90942	15	252	0.94382	24	138
nAChRalpha5	2L:14089207	CDS	AG		0.524803	0.880824		0.123281		0.153209		0.164815		0.339835		0.29586		0.414396		0.25		0.533333		0		N							41	5	0.108696	46	10	0.178571	37	0	0	257	24	0.0854093	217	63	0.225	145	24
nAChRalpha5	2L:14089221	CDS	AG		0.669615	0.892982		0.313069		0.38405		0.366947		0.403857		0.528022		0.375233		0.25		0.833333		0		N							26	13	0.333333	41	13	0.240741	24	9	0.272727	153	88	0.365145	139	109	0.439516	109	32
nAChRalpha5	2L:14089236	CDS	AG		0.743802	0.837264		0.572124		0.613876		0.796296		0.639401		0.742208		0.520833		0.5		0.8		No Reads		N							8	16	0.666667	19	20	0.512821	18	11	0.37931	60	135	0.692308	73	132	0.643902	49	57
nAChRalpha5	2L:14089246	CDS	AG		0.95306	0.944444		0.90312		0.939103		0.952381		0.872252		1		0.925		0.5		1		No Reads		N							1	20	0.952381	0	35	1	0	26	1	29	151	0.838889	16	188	0.921569	30	72
nAChRalpha6	2L:9809297	CDS	AG		0.85746	0.946429		0.616017		0.801587		0.75		0.592879		0.675117		0.785308		0.75		0.875		0		N							9	7	0.4375	5	12	0.705882	9	7	0.4375	33	72	0.685714	21	34	0.618182	10	43
nAChRalpha6	2L:9809349	CDS	AG		0.940668	1		0.66657		0.530952		0.695513		0.592903		0.75747		0.74698		0.652778		0.716667		0		N							4	13	0.764706	3	14	0.823529	6	4	0.4	25	68	0.731183	22	33	0.6	16	34
nAChRalpha6	2L:9809350	CDS	AG		0.986175	0.9		0.571177		0.455556		0.474359		0.453066		0.419553		0.540527		0.708333		0.633333		0		N							6	11	0.647059	5	12	0.705882	8	2	0.2	32	62	0.659574	19	36	0.654545	22	28
nAChRalpha7	X:19334465	CDS	AG		0.997475	0.828042		0.776185		0.810546		0.680952		0.746032		0.918939		0.793175		1		0.833333		0		N							16	22	0.578947	3	17	0.85	2	20	0.909091	19	72	0.791209	32	102	0.761194	7	23
nAChRbeta1	3L:4432487	CDS	AG		0.330596	0.406551		0.166774		0.173266		0.195669		0.632543		0.736915		0.666179		0.684524		0.788043		0.05		N							274	82	0.230337	281	71	0.201705	241	62	0.20462	270	13	0.0459364	165	27	0.140625	153	33
NAT1	2R:12921246	CDS	AG		0.710872	0.622543		0.297585		0.284875		0.253743		0.644444		0.332302		0.374954		0.264957		0.17967		0		N							231	64	0.216949	142	41	0.224044	142	35	0.19774	196	157	0.444759	159	111	0.411111	117	48
Nckx30C	2L:9717614	CDS	AG		0.668195	0.848451		0.552125		0.587039		0.577882		0.766778		0.845619		0.798469		0.838378		0.848165		0.0151515		N							123	181	0.595395	142	147	0.508651	90	109	0.547739	162	187	0.535817	253	281	0.526217	75	112
Nckx30C	2L:9733349	CDS	AG		0.896696	1		0.900809		0.970276		0.961922		0.850309		1		0.860326		0.864312		0.827922		0.0133357		N							27	182	0.870813	14	254	0.947761	12	196	0.942308	54	229	0.809187	42	303	0.878261	5	110
nclb	2R:10876649	CDS	AG		0.826568	0.787879		0.999275		1		1		No Reads		0.5		No Reads		0		0		0		N							0	48	1	0	50	1	0	31	1	0	67	1	1	229	0.995652	0	43
Npl4	3R:25623349	CDS	AG		0.823565	0.783328		0.0014881		0		0		1		0.5		1		1		0		0		0A 6G							86	0	0	63	0	0	34	0	0	111	1	0.00892857	64	0	0	58	0
nrv1	2L:6779407	CDS	AG		0.798997	0.502782		0.0622401		0.166942		0.292719		0.130952		0.141162		0.0821256		0.0333704		0		0		N							14	2	0.125	6	0	0	11	2	0.153846	67	7	0.0945946	36	0	0	17	0
Opa1	2R:14234798	CDS	AG		0.801298	0.740296		0.468049		0.50139		0.580945		0		0.5		0.984375		1		0		0		0A 16G							64	29	0.311828	45	35	0.4375	20	25	0.555556	80	161	0.66805	142	96	0.403361	71	54
OtopLa	X:5631035	CDS	AG		0.715438	0.91701		0.244985		0.368594		0.382525		0.582755		0.723336		0.682921		0.639921		0.572421		0.01		N							355	130	0.268041	357	111	0.237179	253	87	0.255882	240	99	0.292035	253	40	0.136519	113	44
OtopLa	X:5631048	CDS	AG		0.725839	0.73976		0.269402		0.342135		0.311992		0.601116		0.778582		0.709255		0.650862		0.564394		0		N							485	207	0.299133	434	178	0.29085	351	138	0.282209	334	112	0.251121	287	59	0.17052	126	60
para	X:16464719	CDS	AG		0.704294	0.670094		0.483501		0.582689		0.41194		0.80448		0.792908		0.81291		0.697368		0.818182		0		N							22	22	0.5	37	18	0.327273	23	27	0.54	79	183	0.698473	115	58	0.33526	35	35
para	X:16482682	CDS	AG		0.552042	0.549651		0.119676		0.141414		No Reads		0.377705		No Reads		0.393278		0.450669		0.380952		0		N							7	1	0.125	5	0	0	8	2	0.2	31	16	0.340426	39	0	0	18	1
Pex19	2L:12094295	CDS	AG		0.661025	0.60989		0		0.001029		0		No Reads		0.0333333		0.125		0		1		1		N							207	0	0	157	0	0	148	0	0	180	0	0	210	0	0	134	0
Prosap	2R:14062651	CDS	AG		0.917219	1		0.778059		0.754865		0.853175		0.666667		0.384615		0.557211		0.125		0.34058		0		N							4	12	0.75	10	28	0.736842	2	17	0.894737	50	74	0.596774	23	77	0.77	2	23
Prp8	2R:12162664	CDS	AG		0.766194	0.672733		No Reads		0.527778		No Reads		No Reads		No Reads		1		1		0.625		0.529762		0A 15G							1	3	0.75	3	1	0.25	1	6	0.857143	4	6	0.6	0	0	#DIV/0!	7	0
Ptp99A	3R:29483303	CDS	AG		0.892538	0.703193		0.531894		0.37113		0.428788		1		0.316667		0.629588		0.703125		0.564103		0.421405		8A 7G							5	11	0.6875	27	12	0.307692	12	9	0.428571	45	53	0.540816	39	41	0.5125	2	5
puml	2R:7813863	CDS	AG		0.837943	0.774718		0.500284		0.393266		0.544662		No Reads		0.303838		0.449038		0.4		0.1		0		N							26	21	0.446809	13	16	0.551724	4	14	0.777778	15	32	0.680851	83	45	0.351562	46	11
qvr	2R:11447607	CDS	AG		1	1		0.800762		0.852984		0.792372		0.739612		0.995		0.909184		0.920175		0.848017		0.0159799		N							25	106	0.80916	24	91	0.791304	16	46	0.741935	14	128	0.901408	17	55	0.763889	13	51
Rbp	3R:15399446	CDS	AG		0.639121	0.562344		0.201716		0.135338		0.0991304		0.520833		0.526493		0.387483		0.444712		0.483333		0		N							18	0	0	40	1	0.0243902	30	5	0.142857	195	83	0.298561	98	93	0.486911	49	17
Rdl	3L:9155218	CDS	AG		1	0.915686		0.610264		0.872353		No Reads		0.832127		0.875744		0.865359		1		1		0		N							3	19	0.863636	4	1	0.2	8	9	0.529412	59	84	0.587413	28	67	0.705263	13	45
ReepB	2R:14172781	CDS	AG		0.537458	0.519184		0.479028		0.483671		0.541633		0		0.5		1		1		0.0217391		0		0A 11G							529	449	0.4591	461	443	0.490044	403	399	0.497506	650	496	0.43281	357	362	0.503477	290	280
Rim	3R:17881419	CDS	AG		0.987013	0.967		0.507029		0.739441		0.635859		0.523159		0.747024		0.645105		0.596134		0.631429		0		N							13	16	0.551724	26	20	0.434783	6	13	0.684211	55	30	0.352941	51	111	0.685185	16	8
Rim	3R:17881420	CDS	AG		0.984848	0.934492		0.406604		0.60578		0.616499		0.438056		0.640043		0.559833		0.529258		0.522857		0.00943396		N							17	13	0.433333	28	18	0.391304	11	8	0.421053	59	26	0.305882	67	99	0.596386	17	7
Rm62	3R:6004380	CDS	AG		0.342911	0.382182		0.114841		0.174823		0.1666		0.333333		0.258304		0.313045		0.200463		0.200282		0		N							678	86	0.112565	660	92	0.12234	567	80	0.123648	569	56	0.0896	464	80	0.147059	338	35
RNaseZ	2R:10307375	CDS	AG		0.898459	1		0		0.030303		0		0		No Reads		0		No Reads		0		No Reads		N							13	0	0	15	0	0	8	0	0	43	0	0	92	0	0	21	0
rngo	X:16444281	CDS	AG		0.772976	0.636102		0.00666667		0		0		No Reads		0		0		0		0		0		N							40	0	0	27	0	0	24	1	0.04	110	0	0	124	0	0	53	0
Rpn6	2R:14751349	CDS	AG		0.675632	0.552773		0.000490196		0.000816993		0.00197239		0		0		0		0		0		0		N							360	0	0	332	0	0	219	0	0	339	1	0.00294118	371	0	0	259	0
Sec10	3R:24137107	CDS	AG		0.777597	0.924101		1		0.969227		1		0		0.5		0		No Reads		No Reads		0		N							0	17	1	0	23	1	0	25	1	0	45	1	0	73	1	0	17
Sec13	3R:23357683	CDS	AG		0.802953	0.766585		0		0.000977517		0.004329		No Reads		0.5		0		0		1		1		N							149	0	0	129	0	0	102	0	0	424	0	0	271	0	0	176	0
Sec23	3R:5650231	CDS	AG		0.899711	0.905687		0.808585		0.824067		0.83694		No Reads		0.259005		0.325		0.278947		0.342105		0		N							17	120	0.875912	27	76	0.737864	17	50	0.746269	46	185	0.800866	6	151	0.961783	16	43
Sec23	3R:5650351	CDS	AG		0.806409	0.895962		0.766177		0.758395		0.829587		No Reads		0.355729		0.369444		0.175		0.202941		0.016129		N							34	101	0.748148	23	65	0.738636	19	58	0.753247	60	205	0.773585	9	152	0.944099	22	39
Sh	X:17930658	CDS	AG		0.85939	0.710383		0.650677		0.539372		0.851389		0.843913		0.63628		0.795026		0.894737		0.773529		0.025		N							4	24	0.857143	3	12	0.8	14	2	0.125	21	85	0.801887	52	27	0.341772	1	45
Sh	X:17950057	CDS	AG		0.831283	0.790517		0.659379		0.757606		0.693651		0.296903		0.308929		0.330306		0.421584		0.445652		0		N							18	48	0.727273	9	20	0.689655	14	20	0.588235	69	79	0.533784	7	69	0.907895	26	27
Shab	3L:2925255	CDS	AG		0.90351	0.945479		0.572805		0.678769		0.308333		0.818791		0.872494		0.754511		0.80171		0.740091		0.013499		N							8	21	0.724138	19	8	0.296296	3	9	0.75	23	20	0.465116	41	19	0.316667	3	23
Shab	3L:2941132	CDS	AG		0.699498	0.940568		0.626962		0.685735		0.566434		0.671345		0.94493		0.793971		0.866345		0.827927		0.0671101		N							8	22	0.733333	4	12	0.75	2	14	0.875	19	8	0.296296	15	41	0.732143	20	12
Shab	3L:2941216	CDS	AG		0.712764	0.88489		0.178336		0.292029		0.257937		0.0305247		0.027027		0.00221239		0		0.0060241		0		N							24	7	0.225806	14	1	0.0666667	11	1	0.0833333	32	9	0.219512	40	21	0.344262	20	3
Shab	3L:2941312	CDS	AG		0.764083	0.612821		0.629421		0.620716		0.833769		0.635438		0.905702		0.821798		0.788235		0.710084		0		N							5	22	0.814815	12	14	0.538462	2	8	0.8	22	20	0.47619	34	34	0.5	6	11
Shab	3L:2941364	CDS	AG		0.810518	0.950893		0.626099		0.706529		0.877778		0.745815		0.96098		0.832496		0.76294		0.777931		0.00574713		N							2	28	0.933333	14	11	0.44	2	6	0.75	20	19	0.487179	23	37	0.616667	8	9
Shab	3L:2941396	CDS	AG		0.519267	0.764453		0.332415		0.490385		0.776471		0.541138		0.744792		0.5803		0.645314		0.609654		0		N							8	15	0.652174	17	7	0.291667	8	4	0.333333	38	6	0.136364	44	11	0.2	13	8
Shab	3L:2941425	CDS	AG		0.551141	0.894595		0.317915		0.419464		0.35		0.396926		0.607479		0.520406		0.454195		0.375392		0.00431034		N							11	5	0.3125	7	11	0.611111	5	6	0.545455	28	7	0.2	50	3	0.0566038	18	4
Shab	3L:2941426	CDS	AG		0.900805	1		0.70062		0.958691		0.952381		0.86257		0.95979		0.899862		0.888776		0.874207		0.0360792		N							3	12	0.8	3	14	0.823529	1	10	0.909091	18	17	0.485714	23	28	0.54902	8	14
shot	2R:13887556	CDS	AG		0.838902	0.896062		No Reads		No Reads		No Reads		0.54326		0.433852		0.480626		0.359481		0.26479		0		N							1	0	0	0	0	#DIV/0!	0	0	#DIV/0!	0	0	#DIV/0!	0	0	#DIV/0!	11	0
slo	3R:24675663	CDS	AG		0.826115	0.823425		0.900702		0.863611		0.91954		0.621032		0.782327		0.849733		0.795364		0.822134		0		N							4	63	0.940299	2	49	0.960784	2	71	0.972603	34	157	0.82199	15	72	0.827586	10	74
sls	3L:2057834	CDS	AG		0.125	0.1875		No Reads		No Reads		No Reads		0.0238095		No Reads		No Reads		No Reads		0		No Reads		N							0	0	#DIV/0!	0	0	#DIV/0!	0	0	#DIV/0!	0	0	#DIV/0!	0	0	#DIV/0!	0	0
Smg5	2L:13900038	CDS	AG		0.842269	0.690047		1		0.994152		1		0		0.519231		1		1		1		1		0A 14G							0	71	1	0	56	1	0	50	1	0	167	1	0	229	1	0	83
Snx21	2L:2764358	CDS	AG		0.581976	0.453794		0		0		0		No Reads		0		0		0		0		0		N							15	0	0	20	0	0	10	0	0	100	0	0	27	0	0	220	0
Snx21	2L:2764371	CDS	AG		0.455732	0.333416		0		0		0		0		0		0		No Reads		0		0		N							17	0	0	23	0	0	17	0	0	86	0	0	29	0	0	16	0
Sxl	X:7085816	CDS	AG		0.723203	0.841192		0.550411		0.579167		0.487319		0.621032		0.576263		0.721914		0.574074		0.631818		0		N							7	21	0.75	21	27	0.5625	15	12	0.444444	50	34	0.404762	8	36	0.818182	21	10
Syx1A	3R:24103714	CDS	AG		0.274213	0.397327		0.143341		0.117103		0.130336		0.184782		0.299235		0.242187		0.165217		0.191684		0		N							541	79	0.127419	435	97	0.182331	383	90	0.190275	1266	149	0.1053	926	178	0.161232	543	56
Syx1A	3R:24104126	CDS	AG		0.685838	0.682685		0.500121		0.477282		0.556216		0.00241546		0.00757576		0		0.0217391		0		0.0192308		N							222	201	0.475177	220	183	0.454094	151	130	0.462633	351	328	0.483063	214	291	0.576238	141	172
TfIIA-L	3R:27255644	CDS	AG		0.791393	0.735512		0.374446		0.490989		0.481263		0		0		0		0		1		1		N							71	49	0.408333	74	41	0.356522	34	23	0.403509	121	80	0.39801	39	5	0.113636	26	34
Thor	2L:3478627	CDS	AG		0.62935	0.564643		0		0.00854701		0		0		0.00215517		0.00454545		0		0.0178571		0.00675676		N							23	0	0	10	0	0	18	0	0	37	0	0	36	0	0	19	0
ThrRS	2L:12106021	CDS	AG		0.615291	0.527575		0.524895		0.510804		0.520933		1		0.087963		0		0.0909091		1		1		6A 2G							280	282	0.501779	196	187	0.488251	150	152	0.503311	516	464	0.473469	322	625	0.659979	148	162
Tim9b	X:19618035	CDS	AG		0.750038	0.774227		0.728115		0.451136		0.794976		No Reads		0		No Reads		No Reads		No Reads		No Reads		N							1	24	0.96	1	36	0.972973	3	15	0.833333	53	31	0.369048	14	26	0.65	15	21
toc	2L:3127431	CDS	AG		0.94461	0.854167		No Reads		0		0		0		0		0		0		0.00806452		0		N							11	0	0	6	0	0	2	0	0	41	0	0	0	0	#DIV/0!	8	0
toc	2L:3127506	CDS	AG		0.934165	0.991228		No Reads		0		0		0.0661376		0		0		0.0102041		1		0.993421		N							8	0	0	9	0	0	0	0	#DIV/0!	27	0	0	0	0	#DIV/0!	4	0
TpnC47D	2R:11274765	CDS	AG		0.263158	0		No Reads		No Reads		No Reads		No Reads		No Reads		No Reads		No Reads		No Reads		0		N							0	0	#DIV/0!	0	0	#DIV/0!	0	0	#DIV/0!	0	0	#DIV/0!	0	0	#DIV/0!	0	0
Uba1	2R:9688858	CDS	AG		0.655985	0.6547		0.00222514		0		0		0.00694444		0.422741		0.890026		0.909091		0		0		2A 9G							225	0	0	214	0	0	156	0	0	525	0	0	622	5	0.00797448	185	1
Uba1	2R:9689431	CDS	AG		0.802303	0.677324		0.000983284		0		0		0		0.432642		0.880723		0.887746		0		0		0A 13G							199	0	0	203	0	0	103	0	0	425	0	0	337	2	0.00589971	122	0
Ufc1	2R:16007210	CDS	AG		0.790073	0.726448		0.503113		0.539112		0.588009		0		0.5		1		1		0		0		0A 15G							93	70	0.429448	44	63	0.588785	37	44	0.54321	70	99	0.585799	50	29	0.367089	57	58
VhaAC45RP	3R:30165949	CDS	AG		0.635053	0.608269		0.00118583		0.00130935		0.00139415		No Reads		0.138107		0.177444		0.172348		0.0545894		0.0166667		10A 7G							2309	2	0.000865426	2109	7	0.00330813	1609	1	0.000621118	2028	2	0.000985222	844	0	0	748	1
VhaAC45RP	3R:30166167	CDS	AG		0.609414	0.619315		0.000259336		0.000455591		0.00108623		No Reads		0.116484		0.239827		0.132479		0.210256		0.139527		N							1925	3	0.00155602	1759	0	0	1283	0	0	1562	0	0	631	0	0	554	0
VhaAC45RP	3R:30166215	CDS	AG		0.643695	0.585723		0.000512417		0.000693727		0.000277085		No Reads		0.0852403		0.286913		0.075		0		0		N							2147	2	0.000930665	1901	0	0	1545	1	0.000646831	1747	0	0	752	0	0	667	1
Xbp1	2R:21144252	CDS	AG		0.674499	1		0.997398		0.99818		0.994775		No Reads		0.5		1		1		1		1		0A 14G							1	238	0.995816	0	252	1	0	158	1	2	398	0.995	2	309	0.993569	0	149
Ythdc1	3L:3371858	CDS	AG		1	0.793106		0.602184		0.525902		0.712034		No Reads		0.479167		0.31553		0.558352		0.576087		0		N							66	67	0.503759	51	75	0.595238	35	67	0.656863	69	108	0.610169	114	130	0.532787	22	55
zfh1	3R:30774448	CDS	AG		0.8	0.704477		0.608135		0.75		0.444444		No Reads		No Reads		0.358333		0.344697		1		1		N							2	4	0.666667	10	2	0.166667	1	7	0.875	1	6	0.857143	1	3	0.75	6	3
Akap200	2L:8415798	FivePrimeUTR	AG		0.685935	0.584664		0.000726275		0.000955795		0		0		0		0		0		0		0.0104167		N							1262	1	0.000791766	1041	0	0	1076	2	0.00185529	1881	1	0.00053135	1142	0	0	847	1
Apt1	3L:11628408	FivePrimeUTR	AG		0.215739	0.192097		0.000952242		0.000819292		0.00828606		0		0		0		0		0		0		N							354	0	0	285	0	0	278	0	0	572	1	0.0017452	497	0	0	251	1
awd	3R:31745955	FivePrimeUTR	AG		0.719247	0.782115		0.000761035		0		0		No Reads		0		No Reads		No Reads		No Reads		No Reads		N							372	0	0	296	0	0	290	0	0	436	2	0.00456621	174	0	0	319	0
CG12071	3R:30878429	FivePrimeUTR	AG		0.727459	0.914727		0.998688		0.997732		0.991667		0.412088		0.985294		1		1		1		1		0A 12G							0	131	1	1	126	0.992126	0	96	1	0	304	1	0	220	1	0	165
CG12929	2R:9586676	FivePrimeUTR	AG		0.954218	0.944163		0		0		0		No Reads		No Reads		No Reads		No Reads		No Reads		No Reads		2A 7G							7	0	0	12	0	0	10	0	0	14	0	0	17	0	0	15	0
CG15528	3R:30052032	FivePrimeUTR	AG		0.858974	0.790563		0		No Reads		No Reads		0		No Reads		No Reads		0.875		0		0.0555556		7A 10G							2	0	0	2	0	0	4	0	0	27	0	0	4	0	0	5	0
CG31705	2L:11528165	FivePrimeUTR	AG		0.672312	0.901428		0		0		0		No Reads		0.488036		0.938004		0.979167		0		0		1A 28G							10	0	0	4	0	0	5	0	0	13	0	0	24	0	0	1	0
CG42518	2R:18167781	FivePrimeUTR	AG		0.64104	0.73232		0.577101		0.481199		0.438003		0		0.5		0		0		0		0		N							28	41	0.594203	46	32	0.410256	30	28	0.482759	115	109	0.486607	50	76	0.603175	3.1	24
cora	2R:19229564	FivePrimeUTR	AG		0.710106	0.831241		0		0		0		0		0		0		0.00625		0.995327		1		N							39	0	0	44	0	0	32	0	0	79	0	0	70	0	0	14	0
Cow	3R:23112549	FivePrimeUTR	AG		0.69484	0.628047		0.00132415		0.00103842		0		0		0		0.00168919		0.00276243		1		1		N							455	1	0.00219298	314	1	0.0031746	309	0	0	387	1	0.00257732	235	0	0	134	0
DIP1	X:21629725	FivePrimeUTR	AG		0.702903	0.688158		0.627917		0.651285		0.575277		0.405032		0.452976		0.409811		0.393189		0.455806		0		N							52	92	0.638889	44	86	0.661538	64	103	0.616766	19	51	0.728571	10	15	0.6	11	12
DIP1	X:21629726	FivePrimeUTR	AG		0.415877	0.486967		0.219475		0.173907		0.12963		0.230274		0.25807		0.255087		0.142157		0.247312		0		N							112	36	0.243243	115	17	0.128788	148	21	0.12426	68	4	0.0555556	9	16	0.64	21	3
DIP1	X:21629727	FivePrimeUTR	AG		0.394912	0.428592		0.164383		0.220887		0.354997		0.231779		0.285962		0.272215		0.169935		0.278937		0		N							131	18	0.120805	96	39	0.288889	131	40	0.233918	66	7	0.0958904	25	1	0.0384615	19	5
DIP1	X:21629737	FivePrimeUTR	AG		0.526662	0.500372		0.412928		0.28161		0.236155		0.344737		0.411607		0.317846		0.183824		0.366319		0		N							85	46	0.351145	79	31	0.281818	124	37	0.229814	38	33	0.464789	15	10	0.4	5	15
Dop2R	X:20062361	FivePrimeUTR	AG		0.862167	0.833695		0.907215		0.716919		0.880631		1		1		1		1		0		0		0A 15G							7	198	0.965854	7	87	0.925532	3	95	0.969388	40	209	0.839357	39	201	0.8375	10	96
Fim	X:17301717	FivePrimeUTR	AG		0.754856	0.575679		0.998428		0.991153		1		0.994253		1		No Reads		1		1		0		0A 11G							0	36	1	0	41	1	0	32	1	0	173	1	0	151	1	1	105
Ih	2R:14277632	FivePrimeUTR	AG		1	1		0.998677		0.980392		1		No Reads		No Reads		1		1		No Reads		No Reads		0A 22G							0	44	1	0	55	1	0	44	1	0	149	1	1	125	0.992063	0	47
Lpin	2R:8143056	FivePrimeUTR	AG		0.843581	0.453571		0.00446663		0		0.00497512		0		0.328596		0.51132		0.47172		0		0		5A 7G							136	0	0	99	0	0	93	2	0.0210526	189	0	0	173	1	0.00574713	121	0
Miro	3R:24038423	FivePrimeUTR	AG		0.681973	0.822815		0		0		0		0		No Reads		0		0		1		1		N							37	0	0	45	0	0	34	0	0	34	0	0	16	0	0	32	0
Obp44a	2R:8135039	FivePrimeUTR	AG		0.584579	0.654014		0		0		0.00121039		0		0		0		0		0.743421		0.62253		N							83	0	0	55	0	0	34	0	0	169	0	0	258	0	0	161	0
Pli	3R:23889787	FivePrimeUTR	AG		0.722035	0.767389		0		0		0		0		0.5		1		0.984375		1		1		0A 13G							47	0	0	73	0	0	41	0	0	157	0	0	95	0	0	37	0
Pstk	X:19618035	FivePrimeUTR	AG		0.750038	0.774227		0.728115		0.451136		0.794976		No Reads		0		No Reads		No Reads		No Reads		No Reads		N							1	24	0.96	1	36	0.972973	3	15	0.833333	53	31	0.369048	14	26	0.65	15	21
Ptp36E	2L:18184597	FivePrimeUTR	AG		0.795067	0.872222		0.00595238		0		0.047619		0.510594		No Reads		0.239662		0.430622		0		0		N							27	1	0.0357143	29	0	0	24	0	0	128	0	0	82	0	0	56	0
Syx1A	3R:24105265	FivePrimeUTR	AG		0.534564	0.51627		0.495193		0.522659		0.520089		0		0		0		0		0		0		N							492	554	0.529637	474	407	0.461975	444	390	0.467626	1590	1716	0.519056	636	638	0.500785	898	870
Syx1A	3R:24105371	FivePrimeUTR	AG		0.561725	0.525309		0.507197		0.529408		0.534996		0		0		0		0		0		0		N							445	502	0.530095	482	466	0.491561	411	415	0.502421	1537	1605	0.510821	568	648	0.532895	874	792
Syx1A	3R:24105538	FivePrimeUTR	AG		0.545535	0.538936		0.492579		0.513654		0.487877		0		0.005		0		0		0		0		N							756	702	0.481481	670	666	0.498503	611	584	0.488703	2067	2107	0.504792	778	804	0.508217	1214	1093
tun	2R:15849299	FivePrimeUTR	AG		0.877502	0.760001		1		1		1		0.00980392		0.5		1		1		0		0		0A 9G							0	25	1	0	26	1	0	13	1	0	63	1	0	46	1	0	19
vib	3R:19226523	FivePrimeUTR	AG		0.648657	0.700478		0		0.51442		0.474741		0.642598		0.5		1		1		0		0		0A 6G							204	0	0	160	0	0	114	0	0	389	0	0	258	0	0	237	0
Xbp1	2R:21145178	FivePrimeUTR	AG		0.226935	0.281479		0.0548289		0.0494086		0.0579118		0.220238		0.0707536		0.107888		0.0294118		0		0		N							433	31	0.0668103	494	33	0.0626186	351	18	0.0487805	913	82	0.0824121	686	19	0.0269504	301	13
Xrp1	3R:18918354	FivePrimeUTR	AG		0.646406	0.587394		0		0.513364		0.455447		0		0.287942		0.561519		0.505383		0		0		5A 8G							93	0	0	73	0	0	60	0	0	86	0	0	102	0	0	45	0
14-3-3zeta	2R:10108800	ThreePrimeUTR	AG		0.186945	0.208686		0.143342		0.170269		0.0987216		0.22493		0.0718686		0.0952381		0		0.339286		0		N							638	137	0.176774	974	146	0.130357	818	121	0.12886	819	106	0.114595	619	82	0.116976	344	82
14-3-3zeta	2R:10108801	ThreePrimeUTR	AG		0.18106	0.244579		0.110994		0.131064		0.0850981		0.177159		0.259081		0.107143		0.153846		0.303571		0		N							673	105	0.134961	1018	111	0.0983171	850	96	0.10148	792	140	0.150215	659	46	0.0652482	382	50
14-3-3zeta	2R:10108802	ThreePrimeUTR	AG		0.183861	0.267066		0.083818		0.106162		0.0764057		0.168248		0.057394		0.123016		0.0416667		0.216346		0		N							708	69	0.0888031	1011	101	0.0908273	825	109	0.116702	863	63	0.0680346	647	41	0.059593	385	33
Ace	3R:13228355	ThreePrimeUTR	AG		0.812185	0.850016		0.00490196		0.0416667		0		0		0		0.00735294		0		0		0		N							28	0	0	33	1	0.0294118	24	0	0	178	0	0	154	0	0	33	0
Ald1	3R:26254245	ThreePrimeUTR	AG		0.505272	0.535152		0.498033		0.503439		0.492231		0.223704		0.983333		1		1		1		1		0A 24G							1004	992	0.496994	1509	1558	0.507988	1003	1052	0.511922	2183	2338	0.517142	1521	1287	0.458333	1145	1126
Ald1	3R:26254381	ThreePrimeUTR	AG		0.522254	0.546145		0.478646		0.497541		0.465875		0		0.5		1		1		0		0		0A 25G							1162	1114	0.489455	1536	1463	0.487829	1102	1003	0.476485	1765	1790	0.503516	1592	1280	0.445682	837	739
ATPsynCF6	3R:23355357	ThreePrimeUTR	AG		0.559762	0.491543		0.00109042		0.00201693		0.00132802		0		0		0		0		1		1		N							449	0	0	373	2	0.00533333	387	0	0	826	1	0.00120919	406	0	0	631	0
bbc	2R:13486995	ThreePrimeUTR	AG		0.745079	0.94188		0.475575		0.477921		0.549517		0		0		0		0		0		0		N							17	19	0.527778	26	24	0.48	19	9	0.321429	37	73	0.663636	78	87	0.527273	34	17
bbc	2R:13487558	ThreePrimeUTR	AG		0.706352	1		0.424688		0.459622		0.471492		0		0		0		0		0		0		N							16	27	0.627907	28	23	0.45098	13	6	0.315789	41	40	0.493827	36	35	0.492958	35	7
brp	2R:9540849	ThreePrimeUTR	AG		0.576581	0.374079		0.149921		0		No Reads		0.0314498		No Reads		0.25		No Reads		0		No Reads		N							2	0	0	6	1	0.142857	1	2	0.666667	72	3	0.04	76	4	0.05	25	0
CanA-14F	X:16564155	ThreePrimeUTR	AG		0.841486	0.670719		No Reads		No Reads		No Reads		0		No Reads		No Reads		No Reads		No Reads		No Reads		N							0	0	#DIV/0!	0	0	#DIV/0!	2	0	0	9	0	0	37	0	0	16	0
CD98hc	3R:7974599	ThreePrimeUTR	AG		0.658067	0		0.000254453		0.000670229		0		0		0		0		0		0		0		N							296	0	0	267	0	0	232	0	0	654	1	0.00152672	540	0	0	270	0
CG12942	2R:10897181	ThreePrimeUTR	AG		0.607737	0.728587		0.395473		0.2345		0.1		No Reads		No Reads		0		No Reads		0		0		N							5	10	0.666667	23	7	0.233333	9	0	0	9	22	0.709677	14	5	0.263158	8	8
CG15771	X:5759154	ThreePrimeUTR	AG		0.5611	0.686757		0		0		0		0		0		0		0		0		0		N							21	0	0	15	0	0	15	0	0	65	0	0	146	0	0	23	0
CG1907	3R:29620590	ThreePrimeUTR	AG		0.78193	0.730031		0		0		0		0		0.5		1		1		0.298611		0.75		0A 14G							56	0	0	49	0	0	44	0	0	132	0	0	176	0	0	80	0
CG30116	2R:18457250	ThreePrimeUTR	AG		0.737319	1		0		0		0		0		0.5		1		1		0		0		0A 26G							34	0	0	36	0	0	21	0	0	134	0	0	89	0	0	83	0
CG3955	2R:13128147	ThreePrimeUTR	AG		0.69079	0.650679		0.497871		0.469854		0.486201		0		0		No Reads		0		0		0		N							92	115	0.555556	86	82	0.488095	81	78	0.490566	251	286	0.532588	112	152	0.575758	135	71
CG42613	3R:18977756	ThreePrimeUTR	AG		0.89382	0.862233		0.023938		No Reads		No Reads		0		0		No Reads		No Reads		0		No Reads		8A 9G							64	1	0.0153846	56	0	0	38	3	0.0731707	36	0	0	45	1	0.0217391	29	1
CG43732	3R:18969789	ThreePrimeUTR	AG		0.574248	0.472466		0.023938		0.0390469		0.126984		0		0		0		0		0.0108696		0		N							64	1	0.0153846	56	0	0	38	3	0.0731707	36	0	0	45	1	0.0217391	29	1
CG4407	X:12901421	ThreePrimeUTR	AG		0.835681	0.578201		1		1		1		1		No Reads		No Reads		No Reads		0		1		N							0	9	1	0	1	1	0	4	1	0	37	1	0	30	1	0	21
CG4612	2R:24523365	ThreePrimeUTR	AG		0.610276	0.637471		0		0		0		0		0		No Reads		No Reads		0		0		N							14	0	0	12	0	0	7	0	0	92	0	0	99	0	0	65	0
CG6329	2R:13832057	ThreePrimeUTR	AG		0.638441	0.598581		0		0.00130235		0		0		0		0		0		0		0		N							463	0	0	435	0	0	442	0	0	629	0	0	623	0	0	254	0
CG6329	2R:13832539	ThreePrimeUTR	AG		0.59948	0.62784		0		0		0		0		0		No Reads		No Reads		0		No Reads		N							69	0	0	64	0	0	75	0	0	104	0	0	153	0	0	55	0
CG9662	2L:3375848	ThreePrimeUTR	AG		0.78288	0.664859		0.00490196		0		0		No Reads		No Reads		No Reads		No Reads		No Reads		No Reads		N							9	0	0	3	0	0	8	0	0	34	0	0	33	1	0.0294118	17	0
CG9917	X:16321760	ThreePrimeUTR	AG		0.906311	0.692466		0		0		0.00724638		No Reads		No Reads		No Reads		No Reads		0		0		N							40	0	0	36	0	0	52	0	0	119	0	0	145	0	0	75	0
CG9917	X:16321855	ThreePrimeUTR	AG		0.878566	0.75615		0.00707687		0.00178253		0		No Reads		0		0		0		No Reads		0		N							48	0	0	59	0	0	64	0	0	159	6	0.0363636	163	1	0.00609756	77	0
chinmo	2L:1697095	ThreePrimeUTR	AG		0.71239	0		0.593625		0.501833		0.582842		0		0.763636		0.666176		0.5		0		0		6A 11G							23	24	0.510638	23	23	0.5	5	22	0.814815	144	145	0.50173	62	165	0.726872	32	33
cindr	3R:30826946	ThreePrimeUTR	AG		0.656232	0.764794		1		1		1		0		No Reads		0.825		No Reads		No Reads		1		4A 9G							0	22	1	0	14	1	0	9	1	0	67	1	0	76	1	0	16
cpx	3R:4301140	ThreePrimeUTR	AG		0.443459	0.333186		0.135004		0		No Reads		0.131041		No Reads		No Reads		No Reads		No Reads		No Reads		N							9	2	0.181818	5	1	0.166667	3	0	0	11	0	0	7	6	0.461538	3	0
cpx	3R:4301142	ThreePrimeUTR	AG		0.461244	0.421742		0.148518		0.105882		No Reads		0.188544		No Reads		No Reads		No Reads		No Reads		No Reads		N							12	0	0	6	1	0.142857	3	0	0	7	4	0.363636	8	5	0.384615	3	0
cpx	3R:4301148	ThreePrimeUTR	AG		0.620873	0.424446		No Reads		0		No Reads		0.0887915		No Reads		No Reads		No Reads		No Reads		No Reads		N							10	0	0	3	0	0	0	0	#DIV/0!	7	0	0	8	2	0.2	1	0
cpx	3R:4301150	ThreePrimeUTR	AG		0.489921	0.652945		No Reads		0.472222		No Reads		0.433835		No Reads		No Reads		No Reads		No Reads		No Reads		N							5	4	0.444444	2	1	0.333333	0	0	#DIV/0!	2	5	0.714286	4	6	0.6	1	0
cpx	3R:4301152	ThreePrimeUTR	AG		0.358209	0.524931		No Reads		0		No Reads		0.148275		No Reads		No Reads		No Reads		No Reads		No Reads		N							6	2	0.25	3	0	0	0	0	#DIV/0!	7	0	0	10	0	0	1	0
cpx	3R:4301154	ThreePrimeUTR	AG		0.394001	0.534833		No Reads		0.4		No Reads		0.174744		No Reads		No Reads		No Reads		No Reads		No Reads		3A 7G							4	4	0.5	2	0	0	0	0	#DIV/0!	5	2	0.285714	6	2	0.25	0	0
cpx	3R:4301158	ThreePrimeUTR	AG		0.374513	0.609028		No Reads		0		No Reads		0.165681		No Reads		No Reads		No Reads		No Reads		No Reads		N							8	0	0	2	0	0	0	0	#DIV/0!	6	1	0.142857	6	0	0	0	0
cpx	3R:4301200	ThreePrimeUTR	AG		0.600012	0.789893		No Reads		No Reads		No Reads		0.175277		No Reads		No Reads		No Reads		No Reads		No Reads		N							4	1	0.2	2	0	0	0	0	#DIV/0!	2	1	0.333333	1	0	0	0	0
cpx	3R:4301212	ThreePrimeUTR	AG		0.463886	0.676994		No Reads		No Reads		No Reads		0.115666		No Reads		No Reads		No Reads		No Reads		No Reads		N							3	0	0	3	0	0	0	0	#DIV/0!	0	0	#DIV/0!	1	0	0	0	0
cpx	3R:4301240	ThreePrimeUTR	AG		0.360564	0.367791		No Reads		No Reads		No Reads		0.211246		No Reads		No Reads		No Reads		No Reads		No Reads		N							1	0	0	3	0	0	0	0	#DIV/0!	1	2	0.666667	1	0	0	0	0
cpx	3R:4301244	ThreePrimeUTR	AG		0.42495	0.434237		No Reads		No Reads		No Reads		0.308958		No Reads		No Reads		No Reads		0.5		No Reads		N							2	0	0	3	0	0	0	0	#DIV/0!	3	0	0	1	0	0	0	0
cpx	3R:4301246	ThreePrimeUTR	AG		0.351343	0.466686		No Reads		0.0666667		No Reads		0.187575		No Reads		No Reads		No Reads		1		No Reads		N							2	0	0	4	0	0	0	0	#DIV/0!	3	0	0	2	0	0	0	0
cpx	3R:4301258	ThreePrimeUTR	AG		0.441001	0.367435		No Reads		0.178571		No Reads		0.172388		No Reads		No Reads		No Reads		0		No Reads		N							1	0	0	5	0	0	0	0	#DIV/0!	2	0	0	2	0	0	0	2
Csp	3L:22273143	ThreePrimeUTR	AG		0.319994	0.243902		0.0317112		0.0263041		0.0310258		0.0117103		0.0263158		0		0.0454545		0		0		N							470	16	0.0329218	532	12	0.0220588	317	15	0.0451807	462	20	0.0414938	446	19	0.0408602	256	2
ctp	X:4699254	ThreePrimeUTR	AG		0.742002	0.460072		0.793463		0.471365		0.788676		0.715205		0.482405		1		1		0		0		0A 8G							114	733	0.865407	60	508	0.894366	79	579	0.879939	762	1314	0.632948	303	896	0.747289	219	626
cv-2	2R:21355574	ThreePrimeUTR	AG		0.816055	0.609141		0		0		0		0.962963		No Reads		No Reads		1		No Reads		0		0A 17G							21	0	0	20	0	0	11	0	0	76	0	0	102	0	0	34	0
CycT	3L:17552190	ThreePrimeUTR	AG		0.712893	0.773928		0		0		0		0		0		0		0		0		0		N							30	0	0	23	0	0	20	0	0	153	0	0	127	0	0	39	0
Diap2	2R:15932293	ThreePrimeUTR	AG		0.408268	0.487202		0.01132		0.0069808		0		0		0		0.25		No Reads		No Reads		No Reads		N							107	0	0	75	1	0.0131579	62	0	0	255	2	0.0077821	142	7	0.0469799	67	0
eEF1alpha1	2R:11895519	ThreePrimeUTR	AG		0.128	0		0.000660277		0.00126401		0.00069808		0		0		0		No Reads		0		0		N							3811	3	0.000786576	3318	5	0.00150466	2915	3	0.0010281	3989	1	0.000250627	2552	1	0.000391696	2149	0
Eip75B	3L:17953359	ThreePrimeUTR	AG		0.245282	0.186819		0		0		0		0.00187793		No Reads		0		No Reads		No Reads		0		N							10	0	0	11	0	0	11	0	0	40	0	0	25	0	0	17	0
EndoA	3R:18909164	ThreePrimeUTR	AG		0.663328	0.605236		0.00322702		0.506426		0.524516		0		0		0.51038		0.54023		0		0		18A 15G							367	0	0	330	2	0.0060241	266	0	0	436	1	0.00228833	433	0	0	179	2
EndoA	3R:18910153	ThreePrimeUTR	AG		0.65897	0.666239		0.446655		0.487168		0.480299		0.572167		0.855489		0.543537		0.707143		0.766234		0		N							127	117	0.479508	129	97	0.429204	143	83	0.367257	348	268	0.435065	240	259	0.519038	192	157
fipi	2L:4735173	ThreePrimeUTR	AG		0.537043	0		0.00113379		0		0.00595238		0		0		0		0		1		1		N							58	0	0	37	0	0	33	0	0	116	0	0	146	1	0.00680272	52	0
Galphao	2R:10463912	ThreePrimeUTR	AG		0.394855	0.648959		0		0		0		0		0.0119048		0		0		0.35		0.25		N							70	0	0	68	0	0	52	0	0	834	0	0	560	0	0	459	0
Gdh	3R:23936205	ThreePrimeUTR	AG		0.540033	0.614932		0.000838425		0		0		0		0.456481		0		0		1		1		N							830	0	0	927	2	0.00215285	680	0	0	1386	4	0.0028777	1027	0	0	726	0
Gmppa	2R:15677332	ThreePrimeUTR	AG		0.856132	1		1		1		1		No Reads		No Reads		1		1		1		No Reads		0A 12G							0	20	1	0	27	1	0	20	1	0	155	1	0	57	1	0	15
GramD1B	2L:3358929	ThreePrimeUTR	AG		0.878296	0.890708		0		0		0		No Reads		0		0		0		0		0		N							3	0	0	7	0	0	2	0	0	29	0	0	39	0	0	18	0
heca	3R:30371906	ThreePrimeUTR	AG		0.703702	0.784769		0.00111111		0		No Reads		0.0196078		No Reads		No Reads		No Reads		No Reads		No Reads		5A 10G							9	0	0	12	0	0	3	0	0	132	0	0	149	1	0.00666667	51	0
hiw	X:15010444	ThreePrimeUTR	AG		0.823077	0.813347		0.9801		0.984127		1		1		No Reads		1		1		0		1		0A 14G							1	10	0.909091	0	24	1	0	15	1	1	107	0.990741	0	93	1	1	51
hth	3R:10584920	ThreePrimeUTR	AG		0.918367	0.910544		0.564663		0.333333		No Reads		0.501879		0.3299		0.472817		0.125		0.25		0		N							0	12	1	3	9	0.75	4	2	0.333333	33	81	0.710526	72	30	0.294118	21	9
hzg	3L:15993527	ThreePrimeUTR	AG		0.783149	0.958333		0.352507		0.133333		No Reads		0.224361		0.0333333		0.0958333		0.0833333		0		0		N							4	0	0	3	3	0.5	4	6	0.6	46	30	0.394737	59	31	0.344444	21	8
IA-2	2L:1010857	ThreePrimeUTR	AG		0.335998	0.344031		0.208924		0.144207		0.122806		0.00849681		0.246546		0.220821		0.235088		0.307018		0		N							2401	359	0.130072	1784	291	0.140241	1599	285	0.151274	1300	1689	0.565072	5110	846	0.142042	6190	883
IA-2	2L:1011285	ThreePrimeUTR	AG		0.253291	0.27428		0.0206955		0.0302865		0.0359606		0.0874198		0.139921		0.114117		0.0740741		0.0806452		0		N							660	10	0.0149254	534	13	0.023766	484	18	0.0358566	4208	62	0.0145199	1913	40	0.0204813	2291	34
jus	3R:29172906	ThreePrimeUTR	AG		0.48066	0.375412		0		0		0		0		0		No Reads		No Reads		0		0		N							38	0	0	15	0	0	17	0	0	184	0	0	218	0	0	113	0
kay	3R:29794088	ThreePrimeUTR	AG		0.613627	0.623929		0		0		0		0		No Reads		0.625		0.833333		0		0		9A 14G							8	0	0	8	0	0	6	0	0	39	0	0	18	0	0	28	0
l(1)G0196	X:22507458	ThreePrimeUTR	AG		0.717223	0.770772		1		1		1		0.675573		1		1		1		0		0.0909091		0A 11G							0	26	1	0	24	1	0	9	1	0	168	1	0	87	1	0	42
L2HGDH	2L:18972039	ThreePrimeUTR	AG		0.876032	0.730769		1		0.99845		1		No Reads		No Reads		No Reads		0		0		0		N							0	31	1	0	21	1	0	27	1	0	89	1	0	98	1	0	44
Mad	2L:3146192	ThreePrimeUTR	AG		0.965368	0.941104		0		0		No Reads		0		0		0		0		No Reads		No Reads		N							4	0	0	10	0	0	2	0	0	32	0	0	14	0	0	12	0
mbl	2R:17377109	ThreePrimeUTR	AG		0.530953	0.359645		0.0818708		0.257275		0.111111		0.559687		0.685		0.625661		No Reads		0.5		0		N							14	3	0.176471	5	0	0	13	0	0	74	0	0	80	20	0.2	54	7
Msp300	2L:5205966	ThreePrimeUTR	AG		0.525485	0.563685		0.234259		0.22875		0.187302		0.186793		0.131944		0.289865		0.380952		0.130252		0		N							15	3	0.166667	16	3	0.157895	8	1	0.111111	111	86	0.436548	84	21	0.2	48	24
Msp300	2L:5206015	ThreePrimeUTR	AG		0.482436	0.75441		0.403004		0.58185		0.468615		0.405589		0.246181		0.36018		0.223333		0.276268		0		N							17	3	0.15	8	6	0.428571	8	4	0.333333	100	125	0.555556	54	46	0.46	54	52
Msp300	2L:5206020	ThreePrimeUTR	AG		0.554729	0.637433		0.328923		0.278349		0.283267		0.386885		0.21335		0.298025		0.336957		0.142256		0		N							14	10	0.416667	15	5	0.25	8	4	0.333333	176	67	0.27572	68	39	0.364486	82	41
Msp300	2L:5206233	ThreePrimeUTR	AG		0.482105	0.416068		0.161627		0.180368		0.130832		0.226525		0.25962		0.187449		0.0892857		0.109649		0		N							28	3	0.0967742	47	8	0.145455	34	5	0.128205	347	107	0.235683	161	36	0.182741	163	36
mthl3	2R:17448809	ThreePrimeUTR	AG		0.318182	0.257143		No Reads		No Reads		No Reads		No Reads		No Reads		No Reads		No Reads		No Reads		No Reads		N							3	0	0	0	0	#DIV/0!	0	0	#DIV/0!	0	0	#DIV/0!	0	0	#DIV/0!	0	0
Naa15-16	X:19483997	ThreePrimeUTR	AG		0.838636	0.751538		0.826045		0.544622		0.792346		1		1		1		1		0		0		0A 17G							3	48	0.941176	8	73	0.901235	8	23	0.741935	19	119	0.862319	27	76	0.737864	21	71
nAChRbeta1	3L:4429963	ThreePrimeUTR	AG		0.691755	0.795374		0.457009		0.554823		0.63009		0.766412		0.938911		0.890002		0.9375		0.909091		0		N							51	50	0.49505	59	40	0.40404	60	49	0.449541	136	73	0.349282	56	125	0.690608	64	35
nAChRbeta1	3L:4429967	ThreePrimeUTR	AG		0.435087	0.48872		0.107545		0.148295		0.0948373		0.342596		0.471981		0.438961		0.622222		0.606061		0		N							81	16	0.164948	89	8	0.0824742	88	13	0.128713	189	17	0.0825243	162	12	0.0689655	90	12
nAChRbeta1	3L:4430208	ThreePrimeUTR	AG		0.529164	0.614904		0.331357		0.473541		0.166667		0.701985		0.74038		0.666667		No Reads		0.5		0		N							9	7	0.4375	18	5	0.217391	12	4	0.25	30	8	0.210526	12	18	0.6	40	15
ND-B14.5B	2L:3145125	ThreePrimeUTR	AG		0.794475	0.773047		0		0		0		No Reads		0		No Reads		No Reads		No Reads		0		N							7	0	0	6	0	0	6	0	0	15	0	0	7	0	0	12	0
ND-B18	X:15064404	ThreePrimeUTR	AG		0.746484	0.556419		0.00178214		0.00104657		0		0		0		No Reads		0		0		1		N							276	0	0	187	0	0	182	1	0.00546448	699	2	0.00285307	498	0	0	420	1
Nrg	X:8553469	ThreePrimeUTR	AG		0.819105	0.624254		0.85789		0.721591		1		0.719017		No Reads		No Reads		No Reads		No Reads		No Reads		N							0	2	1	1	2	0.666667	1	3	0.75	5	31	0.861111	0	40	1	3	20
nrv2	2L:6789976	ThreePrimeUTR	AG		0.701045	0.802151		0.574459		0.58732		0.494652		0.333333		No Reads		0.333333		0.0416667		0		0		11A 7G							1	4	0.8	5	7	0.583333	8	6	0.428571	15	19	0.558824	14	24	0.631579	5	4
Ntf-2	X:21037775	ThreePrimeUTR	AG		0	0.921958		0.716776		0.474324		0.844022		0.762626		0.5		1		1		0		1		0A 9G							6	51	0.894737	9	27	0.75	7	33	0.825	43	71	0.622807	49	51	0.51	16	37
orb	3R:23260888	ThreePrimeUTR	AG		1	0.754358		No Reads		0		No Reads		0		No Reads		No Reads		0		No Reads		No Reads		N							3	0	0	1	0	0	0	0	#DIV/0!	29	0	0	45	0	0	8	0
pAbp	2R:18146333	ThreePrimeUTR	AG		0.533852	0.515355		0.49978		0.573304		0.510101		0		0.0035461		0		0		0		0		N							10	5	0.333333	17	18	0.514286	9	24	0.727273	195	182	0.482759	135	123	0.476744	75	65
Pka-R2	2R:9994533	ThreePrimeUTR	AG		0.611773	0.64229		0		0		0		0.0190476		0.304167		No Reads		0.833333		0		No Reads		2A 18G							42	0	0	29	0	0	39	0	0	196	0	0	168	0	0	57	0
Pkc98E	3R:29046298	ThreePrimeUTR	AG		0.692154	0.705816		0		0.000737463		0.00252525		0		1		1		1		0.368132		0.183333		0A 9G							382	0	0	357	0	0	324	0	0	613	0	0	750	0	0	350	0
prel	2R:9425652	ThreePrimeUTR	AG		0.724577	0.625		0.00652012		0		0		0.277778		0.46485		0.9375		0.857143		0		0		1A 8G							58	0	0	60	1	0.0163934	43	1	0.0227273	132	0	0	94	0	0	34	0
Proc	2L:7865825	ThreePrimeUTR	AG		0.608581	0.595526		0.620853		0.603955		0.624379		0.916667		0		0		0		0		0		N							2082	3532	0.629141	1500	2377	0.613103	1427	2241	0.61096	3447	6627	0.657832	1826	2622	0.589478	1776	2955
Rab6	2L:12107332	ThreePrimeUTR	AG		0.658687	0.58883		0.00185185		0.00529101		0		0		No Reads		No Reads		No Reads		No Reads		0		10A 3G							21	0	0	32	0	0	23	0	0	89	1	0.0111111	50	0	0	24	0
Rcd-1	X:19640640	ThreePrimeUTR	AG		0.776606	0.643094		0.794407		0.520217		0.745411		1		0		No Reads		0		0		No Reads		N							26	165	0.863874	24	136	0.85	15	126	0.893617	112	249	0.689751	72	221	0.754266	63	158
ReepB	2R:14172820	ThreePrimeUTR	AG		0.526893	0.50127		0.506118		0.48938		0.551874		0		0.502475		1		1		0		0		0A 18G							418	464	0.526077	402	415	0.507956	366	385	0.51265	603	521	0.463523	378	337	0.471329	258	322
Rim	3R:17873639	ThreePrimeUTR	AG		0.958333	0.671103		0.0876647		0.104762		0.025641		0.295786		0.412637		0.306565		0.258333		0.428571		0		N							25	4	0.137931	13	4	0.235294	15	0	0	112	7	0.0588235	116	4	0.0333333	31	2
Rlip	3R:21020562	ThreePrimeUTR	AG		0.920063	0.903956		0.472942		0.437535		0.615741		0.711111		No Reads		0.465278		0.333333		No Reads		No Reads		N							15	9	0.375	4	8	0.666667	7	4	0.363636	65	44	0.40367	56	29	0.341176	5	11
Rpi	2R:23356414	ThreePrimeUTR	AG		0.715284	0.657301		0		0		0		No Reads		0		No Reads		0		0		No Reads		N							19	0	0	15	0	0	13	0	0	73	0	0	53	0	0	26	0
RpL24	2L:13394077	ThreePrimeUTR	AG		0.833333	0.820635		0.00228311		0		0		0		No Reads		No Reads		No Reads		0		No Reads		N							10	0	0	16	0	0	13	0	0	72	1	0.0136986	96	0	0	32	0
RpL29	2R:21294403	ThreePrimeUTR	AG		0.192621	0.19901		0.0164473		0.0136873		0.0122206		0		No Reads		No Reads		0		0		0		N							590	12	0.0199336	377	13	0.0333333	503	8	0.0156556	405	3	0.00735294	182	3	0.0162162	321	2
RpS15Ab	2R:10822219	ThreePrimeUTR	AG		0.168871	0.210389		0.281218		0.208986		0.249986		No Reads		0		0		0		No Reads		0		N							401	145	0.265568	267	94	0.260388	277	83	0.230556	80	47	0.370079	46	15	0.245902	74	34
RpS15Ab	2R:10822309	ThreePrimeUTR	AG		0.474229	0.566395		0.511419		0.499659		0.431103		No Reads		0		0		No Reads		No Reads		0		N							136	140	0.507246	93	92	0.497297	87	108	0.553846	48	65	0.575221	32	34	0.515152	47	34
RpS4	3L:13043906	ThreePrimeUTR	AG		0.54198	0.474973		0.000672043		0		0		0		No Reads		No Reads		No Reads		0		0		N							298	0	0	241	0	0	208	0	0	390	0	0	179	0	0	247	1
RpS8	3R:29863650	ThreePrimeUTR	AG		0.389314	0.437243		0.000891266		0		0.00589445		0.111111		0.125		0.5		1		0.0625		0		5A 6G							204	0	0	186	1	0.00534759	151	0	0	427	0	0	304	0	0	194	0
Rpt5	3R:23754573	ThreePrimeUTR	AG		0.554933	0.560411		0		0		0		No Reads		No Reads		No Reads		No Reads		No Reads		1		N							26	0	0	25	0	0	20	0	0	80	0	0	40	0	0	59	0
salr	2L:11373223	ThreePrimeUTR	AG		0.763243	0.717871		0		0		0		0		0		No Reads		0		0		No Reads		N							9	0	0	6	0	0	13	0	0	32	0	0	130	0	0	62	0
sdt	X:8240090	ThreePrimeUTR	AG		0.914286	0.789814		0.25804		0.127879		0.133333		0.416667		0.753247		0.583333		No Reads		0.5		0		N							4	0	0	7	2	0.222222	1	2	0.666667	94	20	0.175439	75	6	0.0740741	36	25
Sh	X:17926624	ThreePrimeUTR	AG		0.659003	0.693865		0.319339		0.484127		No Reads		0.499903		0.695833		0.459402		0.625		0.333333		0		N							4	3	0.428571	5	1	0.166667	6	3	0.333333	11	17	0.607143	35	12	0.255319	7	1
sli	2R:15871296	ThreePrimeUTR	AG		0.791504	0.633618		0.443713		0.610256		0.513889		0		0.5		1		1		0		0		0A 15G							18	15	0.454545	12	24	0.666667	9	3	0.25	14	19	0.575758	19	3	0.136364	8	11
slo	3R:24707423	ThreePrimeUTR	AG		0.923756	0.96165		0.928598		0.793058		0.82381		0.884016		0.68705		0.799426		0.836597		0.671875		0		N							0	34	1	4	24	0.857143	1	14	0.933333	15	76	0.835165	0	34	1	2	35
slo	3R:24708329	ThreePrimeUTR	AG		0.632561	0.673318		0.279429		0.187466		0.236539		0.165643		0.156487		0.169689		0.333333		0.324545		0		N							38	11	0.22449	32	12	0.272727	16	14	0.466667	132	20	0.131579	28	21	0.428571	50	9
slo	3R:24708330	ThreePrimeUTR	AG		0.70725	0.583049		0.256417		0.181946		0.189128		0.224921		0.271914		0.212448		0.354167		0.293636		0		N							37	12	0.244898	36	9	0.2	25	5	0.166667	130	20	0.133333	32	19	0.372549	33	24
slo	3R:24708356	ThreePrimeUTR	AG		0.853289	0.714762		0.132861		0.122442		0.0906433		0.207927		0.212958		0.137686		0.25		0.0972222		0		N							46	11	0.192982	53	2	0.0363636	26	3	0.103448	150	31	0.171271	47	11	0.189655	52	6
SLO2	2R:10323545	ThreePrimeUTR	AG		0.775403	1		0.399459		0.435881		0.402778		0.0166667		0.40625		0.590043		0.732143		0		0		3A 15G							8	6	0.428571	9	2	0.181818	4	4	0.5	27	9	0.25	70	62	0.469697	13	17
sls	3L:2039918	ThreePrimeUTR	AG		0.540007	0.605842		No Reads		No Reads		No Reads		0.15		0.307692		0.46131		0.4375		0.44958		0.0625		N							0	0	#DIV/0!	0	0	#DIV/0!	0	0	#DIV/0!	0	0	#DIV/0!	0	0	#DIV/0!	0	0
Snx1	2L:3451842	ThreePrimeUTR	AG		0.648298	0.841272		0.524419		0.45977		0.430367		0		No Reads		No Reads		0		0		0		N							15	25	0.625	12	13	0.52	11	4	0.266667	30	14	0.318182	13	39	0.75	10	20
unk	3R:23151701	ThreePrimeUTR	AG		0.279377	0.245565		0.0084271		0		0		0		No Reads		0		No Reads		0		No Reads		N							58	0	0	58	1	0.0169492	30	0	0	211	0	0	115	4	0.0336134	96	0
unk	3R:23152544	ThreePrimeUTR	AG		0.756741	0.806779		0.0208646		0		0		0		0		0		0		0		0		N							76	0	0	45	1	0.0217391	76	0	0	95	0	0	189	0	0	52	6
Vap33	X:3953264	ThreePrimeUTR	AG		0.330702	0.297187		0.189625		0.198158		0.159006		0.222222		0.317262		0.166667		0		0.1		0		N							617	96	0.134642	387	78	0.167742	348	99	0.221477	871	203	0.189013	1061	248	0.189458	367	113
Vap33	X:3953291	ThreePrimeUTR	AG		0.291219	0.298123		0.116002		0.133411		0.123314		0.0740741		0.0762129		0		0		0		0		N							656	93	0.124166	455	67	0.128352	371	82	0.181015	1028	115	0.100612	1237	48	0.0373541	450	64
Vap33	X:3953478	ThreePrimeUTR	AG		0.265526	0.310985		0.192423		0.184744		0.118111		0.0740741		0.15625		No Reads		No Reads		No Reads		No Reads		N							392	99	0.201629	258	77	0.229851	253	51	0.167763	635	133	0.173177	734	166	0.184444	345	85
Vha16-1	2R:6626169	ThreePrimeUTR	AG		0.156326	0.205535		0.0387167		0.047213		0.0388388		0.0770659		No Reads		0		0.0625		0		0		N							254	11	0.0415094	216	6	0.027027	215	5	0.0227273	238	8	0.0325203	56	5	0.0819672	110	3
Vha16-1	2R:6626171	ThreePrimeUTR	AG		0.282185	0.295229		0.140369		0.188061		0.210002		0.176974		No Reads		No Reads		0.0454545		0.126984		0		N							218	53	0.195572	205	20	0.0888889	201	25	0.110619	208	40	0.16129	54	6	0.1	92	21
Vha26	3R:5594099	ThreePrimeUTR	AG		0.231133	0.323485		0.0714218		0.0766634		0.0690838		0.123573		0.13454		0.0748834		0.0250156		0.052956		0		N							2083	177	0.0783186	1928	168	0.0801527	1424	100	0.0656168	2164	176	0.0752137	1346	60	0.0426743	1087	103
wupA	X:18105569	ThreePrimeUTR	AG		0.199145	0.257143		No Reads		No Reads		No Reads		No Reads		No Reads		No Reads		No Reads		No Reads		No Reads		N							0	0	#DIV/0!	0	0	#DIV/0!	0	0	#DIV/0!	0	0	#DIV/0!	0	0	#DIV/0!	0	0
[truncated: 80 more columns]

## Sheet: Info on downloaded datasets
	GSM ID	SRR name	Description
from Cypranowska et al. Biorxiv 2024:
GEO Accession ID: GSE250462	GSM7979414	SRR27275811	OK6>mCherry-NLS, empty
	GSM7979415	SRR27275810	OK6>mCherry-NLS, empty
	GSM7979416	SRR27275809	OK6>mCherry-NLS, empty
	GSM7979417	SRR27275808	OK6>mCherry-NLS, empty
	GSM7979418	SRR27275807	OK6>mCherry-NLS, empty
	GSM7979419	SRR27275806	OK6>mCherry-NLS, empty
	GSM7979420	SRR27275805	OK6>mCherry-NLS, RbpRNAi
	GSM7979421	SRR27275804	OK6>mCherry-NLS, RbpRNAi
	GSM7979422	SRR27275803	OK6>mCherry-NLS, RbpRNAi
	GSM7979423	SRR27275802	OK6>mCherry-NLS, unc13RNAi
	GSM7979424	SRR27275801	OK6>mCherry-NLS, unc13RNAi
	GSM7979425	SRR27275800	OK6>mCherry-NLS, unc13RNAi
from Rodriguez et al. Mol Cell 2012:	GSM914102	SRR485848	Nascentseq_Fly_ZT2_R1 yw -- yellow white, earliest time point, nascent
GSE 37232	GSM914107	SRR485853	Nascentseq_Fly_ZT22_R1 yw-- yellow white, latest time point, nascent
	GSM914108	SRR485854	Nascentseq_Fly_ZT2_R2 yw-- yellow white, earliest time point, nascent
	GSM914113	SRR485859	Nascentseq_Fly_ZT22_R2 yw-- yellow white, latest time point, nascent
	GSM915213	SRR486218	pAseq_Fly_ZT2_yw -- yellow white, earliest time point, mature
	GSM915214	SRR486219	pAseq_Fly_ZT14_yw -- yellow white, latest time point, mature
	GSM915215	SRR486220	pAseq_Fly_ZT0_PE CS -- CantonS, paired end, earliest time point, mature
	GSM915220	SRR486225	pAseq_Fly_ZT20_PE CS-- CantonS, paired end, latest time point, mature
	GSM914114	SRR485860	Nascentseq_Fly_yw_R1 -- yellow white, nascent
	GSM914115	SRR485861	Nascentseq_Fly_yw_R2 -- yellow white, nascent
	GSM914116	SRR485862	Nascentseq_Fly_FM7a_R1 -- FM7a, nascent
	GSM914117	SRR485863	Nascentseq_Fly_FM7a_R2 -- FM7a, nascent
	GSM914118	SRR485864	Nascentseq_Fly_ADAR0_R1 -- ADAR-null, nascent
	GSM914119	SRR485865	Nascentseq_Fly_ADAR0_R2 -- ADAR-null, nascent
	GSM914095	SRR485845	gDNA_Fly_yw -- genomic DNA
from Sapiro et al. PNAS 2019:
GSE 113663	GSM3110802	SRR7063235	UAS-unc84-2XGFP; elav-GAL4
	GSM3110803	SRR7063236	UAS-unc84-2XGFP; elav-GAL4
	GSM3110804	SRR7063237	UAS-unc84-2XGFP; elav-GAL4
