# Supplementary material for: A stochastic RNA editing process targets a select number of sites in individual Drosophila glutamatergic motoneurons
Source: bioRxiv preprint, doi:10.1101/2024.05.17.594696, version 2 (2025-07-01)
Supplement: Supplemental Table 9 [file 594696_file11.xlsx]

## Sheet: Noncanonical edits
				Single-cell Patchseq			Compiled Averages																		gDNA SNP check			Larval Motoneurons OK6>mCherry-NLS, empty (Cypranowska et al. Biorxiv 2024)																				Adult neurons UAS-unc84-2XGFP; elav-GAL4 (Sapiro et al. PNAS 2019)
Gene	Edit Position	GenePart	BiologicalBaseChange	Mean Ib editing	Mean Is editing		Larval Motoneurons (Cypranowska et al. Biorxiv 2024)		Larval Motoneurons, Rbp RNAi (Cypranowska et al. Biorxiv 2024)		Larval Motoneurons, Unc13 RNAi (Cypranowska et al. Biorxiv 2024)		Adult Neurons elav-Gal4 nuclei (Sapiro et al. PNAS 2019)		Adult Fly Head Mature RNA time points aggregated (Rodriguez et al. Mol Cell 2012)		Adult Fly Head Nascent RNA time points aggregated (Rodriguez et al. Mol Cell 2012)		Adult Fly Head Nascent RNA Y-W (Rodriguez et al. Mol Cell 2012)		Adult Fly Head Nascent RNA FM7a (Rodriguez et al. Mol Cell 2012)		Adult Fly Head Nascent RNA ADAR0 (Rodriguez et al. Mol Cell 2012)		Adult Fly Head gDNA (Rodriguez et al. Mol Cell 2012)			Rep1 REF	Rep1 ALT	Prop Edit	Rep2 REF	Rep2 ALT	Prop Edit	Rep3 REF	Rep3 ALT	Prop Edit	Rep4 REF	Rep4 ALT	Prop Edit	Rep5 REF	Rep5 ALT	Prop Edit	Rep6 REF	Rep6 ALT	Prop Edit	COMPILED AVG OK6>mCherry-NLS, empty		Rep1 REF	Rep1 ALT
Act5C	X:5902878	CDS	AT	0	0		0.00141036		0.000898315		0.00105604		0		0		0.00229358		0		0		0		N			27819	24	0.000861976	20760	24	0.00115473	17337	17	0.000979601	14461	10	0.000691037	6947	13	0.00186782	6517	19	0.00290698	0.00141036		23	0
Act87E	3R:13426784	CDS	AT	0.181818	0		No Reads		0		No Reads		No Reads		0		0		0		0		0		N			1	0	0	0	0	#DIV/0!	0	0	#DIV/0!	0	0	#DIV/0!	0	0	#DIV/0!	0	0	#DIV/0!	#DIV/0!		0	0
Calr	3R:9629425	CDS	AT	0.250262	0.334435		0.0424137		0.0109935		0.0427057		0		0		0		0		0.0108696		0		N			2527	70	0.0269542	2277	30	0.0130039	1963	20	0.0100857	3793	250	0.0618353	1791	122	0.0637742	1636	140	0.0788288	0.0424137		5	0
CG13384	2L:8386629	CDS	AT	0.772243	0		0		0		0		No Reads		0		0		0		0		0		N			24	0	0	53	0	0	54	0	0	93	0	0	91	0	0	52	0	0	0		3	0
CG42557	3R:29933689	CDS	AT	0.791361	0.833034		0		0		0		0		No Reads		0.61369		0.928571		0		0.125		1A 4T			1	0	0	4	0	0	2	0	0	5	0	0	22	0	0	13	0	0	0		86	0
CG4646	2R:13219731	CDS	AT	0.76739	0.869296		0.617158		0.581626		0.5		0.933333		0		No Reads		0		0		No Reads		N			15	14	0.482759	4	13	0.764706	12	11	0.478261	20	33	0.622642	4	35	0.897436	19	16	0.457143	0.617158		1	4
CG8547	2R:14261867	CDS	AT	0.736589	0.541652		No Reads		No Reads		No Reads		0		0.236908		0.515934		0.482609		0		0		4A 4T			0	0	#DIV/0!	1	0	0	0	0	#DIV/0!	0	0	#DIV/0!	0	0	#DIV/0!	0	0	#DIV/0!	#DIV/0!		9	0
CLS	3R:25686689	CDS	AT	0.83503	0.956633		0.487242		0.495111		0.413492		1		0.53125		0		0		1		1		0A 13T			4	4	0.5	6	8	0.571429	3	7	0.7	20	13	0.393939	22	47	0.681159	12	1	0.0769231	0.487242		0	2
CLS	3R:25685393	CDS	AT	0.767993	0.945312		0.374569		0.638088		0.48317		0		No Reads		No Reads		0		1		1		0A 10T			16	0	0	22	16	0.421053	9	6	0.4	32	30	0.483871	24	71	0.747368	33	8	0.195122	0.374569		3	0
Cndp2	2R:5699203	CDS	AT	0.704341	0.705897		0		0		0.0162602		0.333333		0.0558894		0.0720085		0.181818		0		0		N			118	0	0	128	0	0	72	0	0	142	0	0	168	0	0	29	0	0	0		4	2
Cow	3R:23075200	CDS	AT	0.646048	0.531542		0.000156937		0.000793387		0.00924512		0		0.00221239		0		0		0		0		N			542	0	0	470	0	0	393	0	0	1061	1	0.00094162	720	0	0	328	0	0	0.000156937		43	0
Desat1	3R:12446448	CDS	AT	0.314529	0.445916		0.00127877		0.000255624		0.00210122		0		0.000801282		0.00384615		0		0.00595238		0		N			747	0	0	703	0	0	454	0	0	706	0	0	566	0	0	388	3	0.00767263	0.00127877		3	0
EndoGI	2L:16259024	CDS	AT	0.677774	0.590262		0.0161638		0.00753897		0		No Reads		0.0147059		0		0		0		0		N			29	0	0	21	0	0	17	0	0	60	4	0.0625	68	0	0	56	2	0.0344828	0.0161638		2	0
Gar1	2R:21097112	CDS	AT	0.80641	0.649203		No Reads		0.420513		0.222222		No Reads		0		No Reads		0		0		0		0A 2T			4	0	0	0	0	#DIV/0!	5	1	0.166667	14	5	0.263158	12	12	0.5	5	11	0.6875	#DIV/0!		0	0
Gar1	2R:21097124	CDS	AT	0.795455	0.649735		No Reads		0.593434		0.222222		No Reads		No Reads		No Reads		0		0		0		0A 2T			3	0	0	0	0	#DIV/0!	4	1	0.2	9	6	0.4	9	5	0.357143	3	6	0.666667	#DIV/0!		0	0
Plekhm1	2R:22105536	CDS	AT	0.701531	0.676972		0.0185185		0		0		No Reads		0.03125		0		0		0		0		N			12	0	0	4	0	0	8	1	0.111111	56	0	0	51	0	0	10	0	0	0.0185185		4	0
RpL7-like	2L:12056632	CDS	AT	0.686509	0.613539		0		0		0		No Reads		0		No Reads		0		0.606061		0.954545		N			94	0	0	57	0	0	69	0	0	269	0	0	88	0	0	54	0	0	0		0	0
shot	2R:13885706	CDS	AT	0.844444	0.799545		No Reads		No Reads		No Reads		0.361033		1		0.995657		1		0		0		N			4	0	0	6	0	0	0	0	#DIV/0!	0	0	#DIV/0!	0	0	#DIV/0!	3	0	0	#DIV/0!		22	12
Sirup	2L:7999251	CDS	AT	0.852547	0.503205		0.00416667		0		0		No Reads		0.493243		0		0		0		0		N			42	0	0	45	0	0	39	1	0.025	153	0	0	67	0	0	68	0	0	0.00416667		0	0
Snx21	2L:2764365	CDS	AT	0.565487	0.425351		0		0.00584795		0		No Reads		0		0		0		0		0		N			17	0	0	22	0	0	17	0	0	91	0	0	28	0	0	14	0	0	0		3	0
twit	2L:20856280	CDS	AT	0.433082	0.582348		0.00115123		0.000424677		0.000474113		No Reads		0.666667		0.125		No Reads		0		0		N			788	2	0.00253165	839	2	0.00237812	627	0	0	2127	2	0.000939408	944	1	0.0010582	893	0	0	0.00115123		0	0
Vha100-1	3R:29136568	CDS	AT	0.71262	0.691226		0.00152387		0.000750014		0.00129199		0		0.5		1		1		0		0		0A 10T			653	1	0.00152905	522	2	0.00381679	395	0	0	1039	2	0.00192123	532	1	0.00187617	400	0	0	0.00152387		31	0
VhaAC39-1	X:3881918	CDS	AT	0.337778	0.2517		0.00216248		0.0014225		0.00122775		0		0		0		0		0		0		N			994	2	0.00200803	813	1	0.0012285	753	4	0.00528402	809	0	0	448	1	0.00222717	448	1	0.00222717	0.00216248		1	0
VhaAC45RP	3R:30166160	CDS	AT	0.613717	0.618954		0.000689529		0.000494326		0		No Reads		0.118503		0.223851		0.140909		0.204762		0.135714		N			1933	2	0.00103359	1779	1	0.000561798	1274	1	0.000784314	1580	0	0	635	0	0	568	1	0.00175747	0.000689529		2	0
wde	2R:10804550	CDS	AT	0.739886	0.84609		0		0		0		0		0		0		0		0		0		N			56	0	0	35	0	0	33	0	0	187	0	0	125	0	0	83	0	0	0		26	0
ATPCL	2R:15994473	CDS	CA	0.834379	1		0.0094818		0.0017094		0		0		0.00403226		0		0		0		0		N			157	0	0	137	0	0	67	0	0	261	6	0.0224719	273	1	0.00364964	63	2	0.0307692	0.0094818		14	0
Bhmt	2L:18956009	CDS	CA	0.836324	0.583333		0		0		0		No Reads		0		0		No Reads		0		0		N			3	0	0	3	0	0	4	0	0	16	0	0	31	0	0	5	0	0	0		0	0
Bhmt	2L:18956470	CDS	CA	0.751603	0.822222		1		0.980392		No Reads		No Reads		No Reads		0		0		0		0		N			0	7	1	0	3	1	0	2	1	0	16	1	0	34	1	0	13	1	1		0	0
bug	2R:15935315	CDS	CA	0.810714	0.913794		0		0		0		No Reads		0.5625		1		1		0		0		0C 6A			6	0	0	7	0	0	7	0	0	32	0	0	61	0	0	17	0	0	0		1	0
bug	2R:15935142	CDS	CA	0.760462	0.904995		0		0		0		No Reads		0.5		No Reads		1		0		0		0C 10A			13	0	0	6	0	0	16	0	0	27	0	0	54	0	0	16	0	0	0		0	0
CG12935	2R:10810273	CDS	CA	0.929342	0.72624		0		0.00350877		0		No Reads		No Reads		No Reads		No Reads		No Reads		No Reads		N			20	0	0	10	0	0	14	0	0	104	0	0	61	0	0	20	0	0	0		0	0
CG14024	2L:5312887	CDS	CA	0.744385	0.7		0.00115568		0.000734214		0		0		0.183333		No Reads		0.25		0		0		4C 2A			366	1	0.0027248	348	0	0	237	0	0	793	1	0.00125945	487	0	0	338	1	0.00294985	0.00115568		9	0
CG1542	3R:31214269	CDS	CA	0.873551	0.754406		0		0		0.0555556		No Reads		0		No Reads		No Reads		0.5		0.75		N			26	0	0	30	0	0	14	0	0	83	0	0	56	0	0	20	0	0	0		1	0
CG31705	2L:11525268	CDS	CA	0.711013	0.72579		0		0		0		0		0.480293		0.954643		0.979454		0.069656		0.0681097		0C 7A			6	0	0	3	0	0	4	0	0	30	0	0	61	0	0	3	0	0	0		5	0
CG32264	3L:3717404	CDS	CA	0.594858	0.481394		0.00354498		0		0		0		0		0		0		0		0		N			120	0	0	158	1	0.00628931	95	1	0.0104167	405	1	0.00246305	475	1	0.00210084	313	0	0	0.00354498		70	0
CG3500	2R:23357063	CDS	CA	0.676145	0.750258		0.0235656		0.00617284		0		No Reads		0		No Reads		0		0		No Reads		N			15	0	0	14	0	0	7	1	0.125	55	0	0	60	1	0.0163934	52	0	0	0.0235656		0	0
CG42518	2R:18168241	CDS	CA	0.647201	0.64962		0.547743		0.570145		0.534334		0		0.5		0		0		0		0		N			16	40	0.714286	30	26	0.464286	22	34	0.607143	111	70	0.38674	59	80	0.57554	30	35	0.538462	0.547743		2	0
CG5555	3R:19179797	CDS	CA	0.806883	0.880399		0		0.431774		0.393142		No Reads		0.3625		0.458333		0.291667		0		0		3C 5A			20	0	0	22	0	0	11	0	0	60	0	0	41	0	0	20	0	0	0		1	0
CG6357	2R:13840246	CDS	CA	0.870767	0.936539		0		No Reads		No Reads		0.166667		0.5		0		0		0		0		N			3	0	0	11	0	0	6	0	0	1	0	0	2	0	0	8	0	0	0		1	0
CG9577	X:20167020	CDS	CA	0	0.674541		0.653177		0.607147		0.840278		No Reads		0.5		1		1		1		0		0C 9A			5	10	0.666667	4	5	0.555556	5	6	0.545455	1	27	0.964286	19	12	0.387097	3	12	0.8	0.653177		0	1
cpb	2L:1705436	CDS	CA	0.780501	0		0.543995		0.496356		0.507778		No Reads		0.366959		0.6		0.619048		0		0		5C 9A			42	46	0.522727	24	28	0.538462	25	38	0.603175	90	91	0.502762	36	38	0.513514	25	35	0.583333	0.543995		0	0
cpb	2L:1705978	CDS	CA	0.645601	0		0.47221		0.488145		0.504864		0		0.5		1		1		0		0		1C 12A			40	32	0.444444	25	22	0.468085	22	27	0.55102	71	75	0.513699	74	24	0.244898	28	44	0.611111	0.47221		1	0
Etfb	3R:29802009	CDS	CA	0.56211	0.686064		0		0		0		0		0.307198		0.5		0.857143		0		0		2C 3A			50	0	0	50	0	0	29	0	0	64	0	0	86	0	0	55	0	0	0		1	0
gkt	2L:3160277	CDS	CA	0.927355	0.938015		0		0.00462963		0		0		0		0		0		0		0		N			30	0	0	34	0	0	22	0	0	187	0	0	150	0	0	27	0	0	0		5	0
Hacd2	2L:13445197	CDS	CA	0.871636	0.812341		0		0.00813121		0		0		0.157143		0.151481		0.175		1		1		N			35	0	0	53	0	0	56	0	0	98	0	0	70	0	0	40	0	0	0		4	0
Hacd2	2L:13445146	CDS	CA	0.831387	0.799353		0		0.00323625		0		0		0.025		0.211648		0.12406		1		1		N			54	0	0	67	0	0	70	0	0	99	0	0	96	0	0	44	0	0	0		5	0
Hrd3	3R:23754957	CDS	CA	0.609572	0.806451		0		0		0		0		0		0		0		1		1		N			9	0	0	21	0	0	10	0	0	16	0	0	58	0	0	26	0	0	0		2	0
Idh3a	X:19519987	CDS	CA	0.553948	0.650702		0.996667		0.998616		0.99899		1		0.502381		1		0.984848		0.0126602		0		0C 8A			2	967	0.997936	3	621	0.995192	1	673	0.998516	5	1672	0.997018	3	1041	0.997126	4	687	0.994211	0.996667		0	3
jeb	2R:12117129	CDS	CA	0.787455	0.718312		0.456684		0.476081		0.43789		0		1		1		1		1		1		0C 6A			97	84	0.464088	95	90	0.486486	83	75	0.474684	212	243	0.534066	306	207	0.403509	137	83	0.377273	0.456684		2	0
Lcp3	2R:8435597	CDS	CA	0	0		No Reads		No Reads		No Reads		No Reads		No Reads		No Reads		No Reads		No Reads		No Reads		N			0	0	#DIV/0!	0	0	#DIV/0!	0	0	#DIV/0!	0	0	#DIV/0!	0	0	#DIV/0!	0	0	#DIV/0!	#DIV/0!		0	0
Map60	2R:9591377	CDS	CA	0.834284	0.83067		0		0.00347222		0		0		0.625		0.866667		0.9		0		0		3C 8A			119	0	0	81	0	0	74	0	0	114	0	0	152	0	0	51	0	0	0		5	0
Mlf	2R:15939086	CDS	CA	0.61744	0		0.996386		0.998326		0.995721		0		0.484375		0		0.05		0		0.02		N			1	552	0.998192	2	409	0.995134	1	414	0.99759	2	358	0.994444	0	279	1	1	141	0.992958	0.996386		9	0
msi	3R:25599545	CDS	CA	0.803741	0.929984		0.00152905		0		0.0138889		0.494444		0.297917		0.714388		0.759091		0.0238095		0		6C 5A			114	0	0	61	0	0	48	0	0	108	1	0.00917431	106	0	0	59	0	0	0.00152905		2	6
Nhe3	2L:6683793	CDS	CA	0.739987	0.744906		0		0		0		No Reads		0		0		0		0		0.0125		N			50	0	0	62	0	0	49	0	0	217	0	0	90	0	0	53	0	0	0		7	0
Npl4	3R:25623367	CDS	CA	0.804592	0.754386		0.000931099		0.0026455		0		No Reads		0.378333		0.801587		0.7375		0		0		1C 6A			143	0	0	90	0	0	54	0	0	178	1	0.00558659	97	0	0	91	0	0	0.000931099		0	3
O-fut1	2R:14162541	CDS	CA	0.604369	0.744134		0.00362473		0		0		No Reads		0.5		1		1		0		0		0C 12A			52	0	0	73	0	0	25	0	0	69	1	0.0142857	133	1	0.00746269	59	0	0	0.00362473		0	0
Plekhm1	2R:22105533	CDS	CA	0.701531	0.616258		0.0030303		0		0		No Reads		0		0		0		0		0		N			12	0	0	4	0	0	9	0	0	58	0	0	54	1	0.0181818	10	0	0	0.0030303		3	0
Rpn6	2R:14751941	CDS	CA	0.674972	0.485119		0.00137174		0		0		No Reads		0.00657895		0		0		0		0		N			241	2	0.00823045	198	0	0	197	0	0	205	0	0	288	0	0	206	0	0	0.00137174		0	0
Rtnl1	2L:5008290	CDS	CA	0.66086	0		0.00115926		0.00173308		0		1		0.0110577		0.0232679		0.0441558		0.0189716		0.0126374		N			380	0	0	284	0	0	252	1	0.00395257	514	0	0	332	1	0.003003	220	0	0	0.00115926		0	15
sn	X:7985453	CDS	CA	0.566422	0.255902		0.00070028		0		0		0		0		0		0		0		0		N			260	0	0	237	1	0.00420168	215	0	0	452	0	0	373	0	0	179	0	0	0.00070028		10	0
Snx21	2L:2764367	CDS	CA	0.48835	0.325421		0		0		0		No Reads		0		0		0		0		0		N			17	0	0	22	0	0	17	0	0	93	0	0	28	0	0	15	0	0	0		2	0
Thor	2L:3479300	CDS	CA	0.608729	0.607317		0		0		0		0		0.0019685		0		0		0		0		N			30	0	0	22	0	0	24	0	0	57	0	0	77	0	0	25	0	0	0		6	0
Tpi	3R:30133374	CDS	CA	0.524777	0.530182		0.000828203		0.000741294		0.00121658		0		0.163035		0.289862		0.37386		0		0		N			4397	6	0.00136271	4208	5	0.0011868	3498	2	0.000571429	5322	8	0.00150094	2878	1	0.000347343	2415	0	0	0.000828203		1	0
tutl	2L:4320666	CDS	CA	0.73921	0		0.000626721		0		0		0		0		0.00454545		0		0		0		N			185	0	0	170	0	0	105	0	0	571	1	0.00174825	496	1	0.00201207	291	0	0	0.000626721		55	0
udd	2R:8106932	CDS	CA	0.826637	0.652794		0		0		0.025641		No Reads		No Reads		0.275		0		0		0		9C 12A			17	0	0	22	0	0	35	0	0	41	0	0	98	0	0	30	0	0	0		0	0
zfh1	3R:30786104	CDS	CA	0.735196	0.689562		0.513817		0.734815		0.5		0		0.833333		0.211111		0.375		1		1		2C 9A			12	19	0.612903	15	15	0.5	5	10	0.666667	38	22	0.366667	73	27	0.27	20	40	0.666667	0.513817		1	0
zfh1	3R:30774301	CDS	CA	0.717949	0.602263		0.635317		0.733333		0.666667		No Reads		0.583333		0.669643		0.4375		0		0		4C 1A			0	3	1	5	5	0.5	1	4	0.8	4	2	0.333333	1	3	0.75	4	3	0.428571	0.635317		0	0
casp	2R:16026529	CDS	CG	0.688634	0.706826		0.578103		0.420489		0.488173		1		0.5		0		0		1		1		0C 22G			40	48	0.545455	33	34	0.507463	15	26	0.634146	74	104	0.58427	21	45	0.681818	47	50	0.515464	0.578103		0	26
CCT3	3R:16648753	CDS	CG	0.193226	0.182939		0.00217075		0.00204781		0.00152207		No Reads		0		0		0		0		0		N			374	2	0.00531915	277	0	0	239	0	0	607	1	0.00164474	439	1	0.00227273	263	1	0.00378788	0.00217075		0	0
Cdc50	X:16440016	CDS	CG	0.735655	0.584824		0		0		0		0		0		0		0		0		0		N			171	0	0	173	0	0	166	0	0	273	0	0	168	0	0	204	0	0	0		6	0
CG33303	2L:10374901	CDS	CG	0.663101	0.75138		0.46224		0.456739		0.421894		No Reads		1		No Reads		1		0.666667		0.733333		0C 15G			151	101	0.400794	114	96	0.457143	72	71	0.496503	241	153	0.388325	95	104	0.522613	61	63	0.508065	0.46224		0	0
CG3955	2R:13128207	CDS	CG	0.730437	0.721852		0.479		0.507949		0.534398		0		0		0		0		0		0		N			74	108	0.593407	77	62	0.446043	84	65	0.436242	244	249	0.505071	114	118	0.508621	128	80	0.384615	0.479		10	0
CG44245	2R:21212006	CDS	CG	0.635109	0.959343		0.00653595		0		0		0		0.5		1		1		0		0		0C 8G			33	0	0	29	0	0	14	0	0	163	0	0	90	0	0	49	2	0.0392157	0.00653595		23	0
CG5555	3R:19179722	CDS	CG	0.878628	0.909335		0		0.446338		0.386905		0		0.263889		0.75		0.212121		1		1		8C 10G			16	0	0	13	0	0	8	0	0	44	0	0	32	0	0	17	0	0	0		3	0
CG6357	2R:13840392	CDS	CG	0.879571	0.849091		No Reads		No Reads		No Reads		0		0		0		0		0		0		N			4	0	0	11	0	0	5	0	0	5	0	0	0	0	#DIV/0!	4	0	0	#DIV/0!		6	0
CG7920	3R:30012000	CDS	CG	0.615447	0.74199		0.0036672		0.00162117		0.00369751		0		0.325391		0.580414		0.728969		0		0		5C 4G			249	2	0.00796813	183	0	0	146	0	0	361	0	0	341	1	0.00292398	89	1	0.0111111	0.0036672		1	0
CG9743	3R:30196912	CDS	CG	0.683591	0.589783		0.531345		0.460233		0.51384		No Reads		0.40625		No Reads		0.25		0		0		4C 3G			10	6	0.375	4	8	0.666667	3	5	0.625	27	39	0.590909	41	53	0.56383	19	11	0.366667	0.531345		1	0
eIF4EHP	3R:24107134	CDS	CG	0.735622	0.863713		0.507032		0.429982		0.545833		No Reads		0		0.0208333		0		0		0		N			22	15	0.405405	12	8	0.4	12	20	0.625	43	44	0.505747	47	110	0.700637	22	15	0.405405	0.507032		1	0
fne	X:12943233	CDS	CG	0.874179	0.734029		0.999306		1		1		1		0.5		0		0		1		1		N			0	78	1	0	49	1	0	37	1	0	314	1	1	239	0.995833	0	103	1	0.999306		0	7
gkt	2L:3160233	CDS	CG	0.978039	0.914015		0.00138889		0.00132802		0		0		0		No Reads		0		0		0		N			23	0	0	25	0	0	14	0	0	148	0	0	119	1	0.00833333	17	0	0	0.00138889		4	0
Golgin245	2R:23371927	CDS	CG	0.858156	0.917763		0		0		0		0		0		0		0		0		0		N			12	0	0	2	0	0	18	0	0	9	0	0	113	0	0	20	0	0	0		11	0
Lcp1	2R:8430844	CDS	CG	0.247213	0.29		No Reads		No Reads		No Reads		No Reads		No Reads		0.416667		0		0		0.25		N			0	0	#DIV/0!	0	0	#DIV/0!	0	0	#DIV/0!	0	0	#DIV/0!	0	0	#DIV/0!	0	0	#DIV/0!	#DIV/0!		0	0
muc	2L:7429839	CDS	CG	0.334284	0.606982		0.00405628		0.00326627		0.00487151		0		0		0		0		0		0		N			192	0	0	138	0	0	149	1	0.00666667	512	2	0.00389105	530	4	0.00749064	158	1	0.00628931	0.00405628		13	0
Pex19	2L:12094077	CDS	CG	0.718995	0.681188		0.00152422		0.00150369		0		No Reads		0.0297619		0		0.125		1		1		N			261	0	0	191	1	0.00520833	147	0	0	253	1	0.00393701	203	0	0	139	0	0	0.00152422		0	0
Pex19	2L:12094682	CDS	CG	0.67136	0.726408		0.0018315		0.000694849		0		No Reads		0.0347222		0.05		0		0		0		N			323	0	0	239	0	0	180	2	0.010989	312	0	0	350	0	0	242	0	0	0.0018315		0	0
Pglym78	3R:29149232	CDS	CG	0.526853	0.559583		0.00114443		0.000591162		0.000429802		No Reads		0.5		1		1		0.0190705		0		0C 2G			8828	8	0.000905387	7138	4	0.000560067	6205	4	0.000644226	7493	17	0.00226365	4680	8	0.00170648	5080	4	0.000786782	0.00114443		0	0
Pkc98E	3R:29046104	CDS	CG	0.753638	0.770006		0.000636132		0		0		0		0.5		1		1		0		0		0C 12G			391	0	0	402	0	0	318	0	0	532	0	0	597	0	0	261	1	0.00381679	0.000636132		13	0
RpS14b	X:7935660	CDS	CG	0	0		0.196263		0.224287		0.199473		0		0		0		0		0		0		N			1847	588	0.241478	1182	332	0.219287	1368	438	0.242525	2476	454	0.154949	1252	179	0.125087	1261	304	0.194249	0.196263		3	0
salr	2L:11373146	CDS	CG	0.76126	0.780513		0.00555556		0		0		0		0		0		0		0		0.666667		N			13	0	0	7	0	0	15	0	0	29	1	0.0333333	122	0	0	60	0	0	0.00555556		8	0
shrb	2R:9143637	CDS	CG	0.5	0.55799		0.000771605		0		0		0		0		0		0		0		0		N			235	0	0	215	1	0.00462963	164	0	0	760	0	0	382	0	0	194	0	0	0.000771605		13	0
Snx21	2L:2764360	CDS	CG	0.579875	0.439492		0		0		0		No Reads		0		0		0		0		0		N			17	0	0	23	0	0	12	0	0	95	0	0	26	0	0	22	0	0	0		3	0
spas	3R:24039171	CDS	CG	0.668804	0.746148		0		0		0.0138889		No Reads		No Reads		0.0916667		0.125		1		1		N			58	0	0	60	0	0	38	0	0	109	0	0	36	0	0	56	0	0	0		1	0
Tpi	3R:30133813	CDS	CG	0.52649	0.541685		0.00123423		0.000818958		0.00078626		No Reads		0.093309		0.138243		0.168966		0		0.0108696		N			4009	4	0.000996761	3918	8	0.0020377	3355	5	0.0014881	4881	4	0.000818833	2641	3	0.00113464	2150	2	0.000929368	0.00123423		0	0
TpnC47D	2R:11274635	CDS	CG	0.227273	0		No Reads		No Reads		No Reads		No Reads		No Reads		No Reads		No Reads		No Reads		0		N			0	0	#DIV/0!	0	0	#DIV/0!	0	0	#DIV/0!	0	0	#DIV/0!	0	0	#DIV/0!	0	0	#DIV/0!	#DIV/0!		0	0
VhaAC45RP	3R:30166242	CDS	CG	0.653209	0.578897		0.00167336		0.000843708		0.00180592		No Reads		0.0811769		0.311138		0.08		0		0		3C 8G			2151	1	0.000464684	1829	2	0.0010923	1533	3	0.00195312	1757	1	0.000568828	718	0	0	667	4	0.00596125	0.00167336		1	0
Act5C	X:5903210	CDS	CT	0	0		0.00207896		0.00148506		0.00223229		0		0.000659631		0		0.0037037		0.00245098		0.00208333		N			36768	69	0.00187312	26209	49	0.0018661	21848	36	0.00164504	18954	29	0.00152768	8645	20	0.00230814	7965	26	0.00325366	0.00207896		3	0
Act5C	X:5903533	CDS	CT	0	0		0.00107491		0.00173455		0.00239463		0		0.00200185		0		0		0.00320513		0		N			37229	37	0.000992862	27301	30	0.00109765	21698	28	0.00128878	20526	29	0.00141085	10046	11	0.00109377	8836	5	0.000565547	0.00107491		26	0
Act5C	X:5903624	CDS	CT	0	0		0.00130787		0.00117208		0.00164447		0		0		0.00454545		0		0		0		N			37644	59	0.00156486	28309	42	0.00148143	23102	35	0.00151273	25294	28	0.00110576	12598	16	0.00126843	10931	10	0.000913993	0.00130787		31	0
Act5C	X:5903627	CDS	CT	0	0		0.00173276		0.00149421		0.00217228		0		0		0		0		0.00265957		0		N			37401	64	0.00170826	28166	59	0.00209035	23032	37	0.00160388	25209	41	0.00162376	12578	23	0.00182525	10986	17	0.00154503	0.00173276		31	0
Act87E	3R:13427062	CDS	CT	0.153846	0.226667		No Reads		0.443701		No Reads		No Reads		0		0		0.0227273		0		0		N			0	5	1	0	6	1	2	6	0.75	0	0	#DIV/0!	0	2	1	0	4	1	#DIV/0!		0	0
Act87E	3R:13427113	CDS	CT	0	0		0.85798		0.603892		0.945054		No Reads		0		0		0		0		0		N			23	124	0.843537	7	90	0.927835	18	65	0.783133	13	70	0.843373	6	18	0.75	0	36	1	0.85798		0	0
Act87E	3R:13427116	CDS	CT	0	0		0		0		0		No Reads		0		0		0		0.00561798		0		N			169	0	0	103	0	0	95	0	0	88	0	0	28	0	0	41	0	0	0		1	0
Act87E	3R:13427252	CDS	CT	0	0		No Reads		0		No Reads		No Reads		0.00694444		0		0		0.00666667		0.00423729		N			5	0	0	2	0	0	4	0	0	0	0	#DIV/0!	2	0	0	2	0	0	#DIV/0!		0	0
Act87E	3R:13427398	CDS	CT	0	0		No Reads		0		No Reads		0		0.00490196		0		0		0		0		N			0	0	#DIV/0!	0	0	#DIV/0!	9	0	0	0	0	#DIV/0!	0	0	#DIV/0!	0	0	#DIV/0!	#DIV/0!		6	0
Ank2	3L:7681220	CDS	CT	0.547161	0.447343		0.141039		0.0670562		0.0714286		0.0851791		0		0.000888776		0.00191653		0.00266578		0.000835422		N			85	16	0.158416	19	1	0.05	37	7	0.159091	322	44	0.120219	257	69	0.211656	122	21	0.146853	0.141039		330	32
AnxB10	X:20172402	CDS	CT	0.691844	0.650951		0.448264		0.46568		0.788059		No Reads		No Reads		0.983333		1		0.0416667		0.98		19C 10T			52	39	0.428571	14	32	0.695652	0	181	1	110		0	355	79	0.182028	74	46	0.383333	0.448264		4	0
Arc1	2R:14359830	CDS	CT	0.478444	0.534141		0.00195239		0.000342583		0.00336585		0		0.00287356		0		0		0.00189394		0		N			111	0	0	128	0	0	87	0	0	401	1	0.00248756	237	1	0.00420168	198	1	0.00502513	0.00195239		11	0
Arp2	X:16549398	CDS	CT	0.870647	0.927495		0.00365817		0.00217865		0		No Reads		0		0.025		0		0		0		N			35	0	0	60	1	0.0163934	39	0	0	110	0	0	179	1	0.00555556	57	0	0	0.00365817		2	0
Arpc2	2L:20420784	CDS	CT	0.88505	0.585177		0.00605263		0.00185185		0		No Reads		0.5		0.0590278		0.25		0.335165		0.314145		N			99	1	0.01	120	0	0	74	2	0.0263158	209	0	0	209	0	0	57	0	0	0.00605263		1	1
Atg7	2R:18624812	CDS	CT	0.794771	0.750096		No Reads		1		1		No Reads		No Reads		No Reads		No Reads		0		0		0C 14T			0	7	1	0	8	1	0	3	1	1	34	0.971429	0	13	1	0	0	#DIV/0!	#DIV/0!		3	0
Bet5	3R:30180553	CDS	CT	0.899793	0.839402		0		0		0		0		0.03125		No Reads		No Reads		No Reads		0		15C 4T			18	0	0	33	0	0	26	0	0	147	0	0	128	0	0	61	0	0	0		2	0
beta-Spec	X:17666694	CDS	CT	0.7641	0.674632		0.0022783		0.998257		1		No Reads		0.997159		0		0		0.99375		1		N			249	1	0.004	215	0	0	153	0	0	395	0	0	467	2	0.00426439	184	1	0.00540541	0.0022783		0	0
betaTub56D	2R:19447592	CDS	CT	0.215422	0.181387		0.00104159		0.00109647		0.00126787		0		0		0		0		0		0		N			26710	36	0.001346	24080	29	0.00120287	19241	17	0.00088275	32697	34	0.00103877	15487	15	0.000967617	17237	14	0.000811547	0.00104159		27	0
betaTub60D	2R:24312051	CDS	CT	0.784069	0.787516		0.915095		1		0.91937		No Reads		0		0		0		0		0		N			11	43	0.796296	8	46	0.851852	5	50	0.909091	0	62	1	0	44	1	2	28	0.933333	0.915095		0	0
bonsai	2R:22638349	CDS	CT	0.476608	0.441545		0		0.00766385		0.00694444		No Reads		0		0		0		0		0		N			37	0	0	31	0	0	17	0	0	57	0	0	107	0	0	57	0	0	0		0	0
bug	2R:15935324	CDS	CT	0.757311	0.907116		0.00273224		0		0		No Reads		0.5		No Reads		1		0		0		0C 6T			5	0	0	9	0	0	10	0	0	33	0	0	60	1	0.0163934	21	0	0	0.00273224		0	0
CanB	X:5333689	CDS	CT	0.363202	0.184563		0.00266765		0.00338594		0.00282617		0		0		0		0		0		0		N			2228	7	0.00313199	1439	1	0.000694444	1498	7	0.00465116	2771	3	0.00108147	1580	4	0.00252525	1016	4	0.00392157	0.00266765		13	0
Ced-12	2L:12100451	CDS	CT	0.743453	0.615385		0.435227		0.548611		0.35		1		0.5		1		1		1		1		0C 14T			7	3	0.3	5	3	0.375	7	3	0.3	0	7	1	7	0	0	4	7	0.636364	0.435227		0	15
Cep164	X:15978467	CDS	CT	0.304762	0.488763		0.0135259		0		0		0		0		0		0		0		0		N			86	1	0.0114943	78	0	0	41	2	0.0465116	224	3	0.0132159	299	3	0.00993377	121	0	0	0.0135259		2	0
CG13384	2L:8386890	CDS	CT	0.847378	0		0		0.003663		0		0		0.400877		0.672719		0.464286		0		0		4C 14T			37	0	0	30	0	0	28	0	0	99	0	0	105	0	0	47	0	0	0		2	0
CG13384	2L:8386605	CDS	CT	0.767813	0		0		0		0.00980392		0		0		0		0		0		0		N			28	0	0	57	0	0	48	0	0	88	0	0	85	0	0	47	0	0	0		4	0
CG13601	3R:23926674	CDS	CT	0.820418	0.880238		0		0		0		0		0.5		0		0		1		1		N			15	0	0	20	0	0	11	0	0	36	0	0	37	0	0	24	0	0	0		3	0
CG14321	3R:17734055	CDS	CT	0.386732	0.249885		0.00191551		0.00582384		0.0130031		No Reads		0		0		0		No Reads		0		N			382	2	0.00520833	408	1	0.00244499	378	0	0	787	1	0.00126904	388	1	0.00257069	380	0	0	0.00191551		3	0
CG15537	3R:30435558	CDS	CT	0	0.559419		0.496115		0.48745		0.510336		0		0.325893		No Reads		No Reads		0.2		0.666667		1C 8T			161	167	0.509146	184	152	0.452381	118	86	0.421569	456	604	0.569811	295	323	0.522654	221	222	0.501129	0.496115		5	0
CG1902	2R:9604798	CDS	CT	0.740728	0.806863		0.00336284		0.00108225		0		0		0.452991		0.696429		0.82906		0		0		2C 11T			209	0	0	132	1	0.0075188	78	1	0.0126582	301	0	0	177	0	0	108	0	0	0.00336284		9	0
CG1907	3R:29619730	CDS	CT	0.892027	0.825847		0.434618		0.486098		0.525036		No Reads		0.98592		1		1		0.0663158		0.0912698		0C 9T			30	24	0.444444	12	27	0.692308	28	13	0.317073	49	44	0.473118	85	43	0.335938	38	20	0.344828	0.434618		1	0
CG1907	3R:29619778	CDS	CT	0.842807	0.904762		0.457393		0.459648		0.400149		No Reads		1		1		1		0.0681818		0.0555556		0C 6T			31	34	0.523077	20	34	0.62963	37	21	0.362069	56	43	0.434343	100	75	0.428571	38	22	0.366667	0.457393		0	0
CG1907	3R:29620300	CDS	CT	0.759315	0.771314		0.43033		0.448365		0.479104		0		1		1		1		0		0		0C 10T			41	23	0.359375	30	32	0.516129	33	21	0.388889	90	69	0.433962	97	81	0.455056	44	33	0.428571	0.43033		4	0
CG31705	2L:11524947	CDS	CT	0.812586	0.752291		0.00320513		0		0		No Reads		0.492788		0.975719		0.978814		0.216732		0.169009		0C 7T			10	0	0	11	0	0	6	0	0	51	1	0.0192308	41	0	0	4	0	0	0.00320513		0	0
CG33303	2L:10375320	CDS	CT	0.719241	0.720923		0.502681		0.461736		0.498185		0.222222		1		1		1		0.766234		0.807143		0C 16T			122	99	0.447964	105	74	0.413408	68	74	0.521127	221	156	0.413793	73	119	0.619792	38	57	0.6	0.502681		1	0
CG33303	2L:10374631	CDS	CT	0.690526	0.724652		0.40284		0.428429		0.465814		No Reads		1		1		No Reads		1		0.8		0C12T			165	114	0.408602	139	110	0.441767	107	64	0.374269	364	207	0.362522	194	144	0.426036	93	63	0.403846	0.40284		0	1
CG33303	2L:10374757	CDS	CT	0.642456	0.749815		0.441732		0.436363		0.40557		No Reads		1		1		1		0.828571		0.583333		0C 10T			151	115	0.432331	134	99	0.424893	79	71	0.473333	308	222	0.418868	139	124	0.471483	89	67	0.429487	0.441732		0	0
CG33506	2R:14858093	CDS	CT	0.866077	0.880429		0.462403		0.656596		0.528391		No Reads		1		No Reads		1		1		1		0C 14T			13	5	0.277778	8	3	0.272727	6	14	0.7	14	6	0.3	18	22	0.55	15	31	0.673913	0.462403		0	2
CG3500	2R:23356979	CDS	CT	0.68725	0.749478		0		0		0		No Reads		No Reads		0		No Reads		0		0		N			19	0	0	11	0	0	7	0	0	33	0	0	54	0	0	36	0	0	0		0	0
CG3500	2R:23356967	CDS	CT	0.675733	0.754565		0		0		0		No Reads		No Reads		0		No Reads		0		0		N			26	0	0	15	0	0	9	0	0	37	0	0	58	0	0	40	0	0	0		0	0
CG3500	2R:23356936	CDS	CT	0.674997	0.700637		0		0		0.0277778		No Reads		0		0		No Reads		0		0		N			25	0	0	13	0	0	6	0	0	35	0	0	65	0	0	38	0	0	0		1	0
CG3556	X:4532581	CDS	CT	0.849027	0.489429		0.769767		0.506008		0.823666		No Reads		0.461538		0.946023		1		0		0		0C 5T			43	316	0.880223	26	237	0.901141	22	171	0.88601	348	639	0.647416	205	326	0.613936	98	218	0.689873	0.769767		2	0
CG3955	2R:13128738	CDS	CT	0.683845	0.725248		0.998366		0.99516		0.996032		No Reads		0		0		0		0		0		N			0	190	1	0	142	1	0	138	1	0	436	1	1	238	0.995816	1	177	0.994382	0.998366		0	0
CG40191	2R:1264787	CDS	CT	0.813061	1		0		0		0		0		0		0		0		0		0		N			55	0	0	58	0	0	48	0	0	59	0	0	143	0	0	68	0	0	0		15	0
CG4239	X:16387817	CDS	CT	0.527196	0.649722		0.633993		0.802358		0.638889		0.166667		0		0		0		0		0.025		N			6	8	0.571429	7	5	0.416667	5	3	0.375	0	32	1	7	24	0.774194	7	14	0.666667	0.633993		1	1
CG42390	3R:22132975	CDS	CT	0.884211	0.941667		No Reads		No Reads		No Reads		No Reads		0.5		0.977273		1		0		0		0C 6T			0	0	#DIV/0!	0	0	#DIV/0!	0	0	#DIV/0!	0	0	#DIV/0!	0	0	#DIV/0!	0	0	#DIV/0!	#DIV/0!		0	0
CG44245	2R:21212024	CDS	CT	0.632238	0.947139		0		0		0		0		0.5		1		1		0		0		0C 7T			42	0	0	31	0	0	22	0	0	181	0	0	104	0	0	52	0	0	0		23	0
CG4646	2R:13220050	CDS	CT	0.783432	0.89204		0.530706		0.574424		0.604816		No Reads		0		0		0		0		0		N			13	14	0.518519	9	13	0.590909	23	14	0.378378	30	50	0.625	14	35	0.714286	27	15	0.357143	0.530706		0	0
CG4789	X:16801880	CDS	CT	0.794967	0.742903		0		0		0		0		1		1		1		0		0		0C 8T			86	0	0	85	0	0	45	0	0	158	0	0	146	0	0	76	0	0	0		7	0
CG6191	2R:13581233	CDS	CT	0.877482	1		0.501202		0.514749		0.454666		0.340909		0		0		0		0		0		N			19	16	0.457143	16	12	0.428571	11	9	0.45	43	145	0.771277	59	20	0.253165	30	55	0.647059	0.501202		3	1
CG6191	2R:13581018	CDS	CT	0.85937	0.783761		0.99537		0.99359		1		0		0		0		0		0		0		N			0	32	1	0	46	1	0	13	1	0	206	1	0	95	1	2	70	0.972222	0.99537		35	0
CG6357	2R:13840253	CDS	CT	0.886977	0.915564		0		No Reads		No Reads		0		0		0		0		0		0		N			3	0	0	13	0	0	9	0	0	2	0	0	1	0	0	11	0	0	0		1	0
CG7601	3R:29736508	CDS	CT	0.945355	1		0		0		0		No Reads		0.464286		0.72619		0.75		0		0		6C 11T			13	0	0	8	0	0	7	0	0	42	0	0	15	0	0	25	0	0	0		0	0
CG7781	2L:8322533	CDS	CT	0.591845	0.625133		0.405874		0.451744		0.436603		0.0268789		0		0		0		0		0		N			1052	978	0.481773	933	746	0.444312	700	615	0.467681	1136	662	0.368187	625	254	0.288965	487	304	0.384324	0.405874		62	3
CG7950	3R:30057887	CDS	CT	0.720388	0.666895		0.0068251		0.00532948		0.00990099		0		0.267857		0.266667		No Reads		0		0		8C 4T			127	3	0.0230769	148	0	0	106	1	0.00934579	377	1	0.0026455	338	2	0.00588235	113	0	0	0.0068251		1	0
CG8206	X:15739486	CDS	CT	0.812304	0.903972		1		0.989648		1		No Reads		0.5		0		0		0		1		N			0	27	1	0	10	1	0	20	1	0	42	1	0	31	1	0	28	1	1		0	0
CG8405	2R:16048178	CDS	CT	0.679824	0.759928		0		0		0		0		0.5		1		1		0.0434028		0		0C 6T			26	0	0	23	0	0	12	0	0	17	0	0	24	0	0	7	0	0	0		24	0
CG8547	2R:14264047	CDS	CT	0.864773	0.738384		No Reads		No Reads		No Reads		No Reads		0.232639		0.477508		0.494852		0		0		10C 5T			2	0	0	1	0	0	1	0	0	0	0	#DIV/0!	0	0	#DIV/0!	0	0	#DIV/0!	#DIV/0!		0	0
CG8768	2R:12691813	CDS	CT	0.968182	0.931034		0.589263		0.530312		0.379552		0		No Reads		No Reads		0		0		0		N			13	12	0.48	15	23	0.605263	12	12	0.5	0	10	1	59	27	0.313953	8	14	0.636364	0.589263		4	0
CG9344	2R:20977348	CDS	CT	0.688868	0.629591		0.00206153		0.00342466		0		0		1		No Reads		No Reads		No Reads		0		0C 15T			169	0	0	119	0	0	88	0	0	312	1	0.00319489	216	2	0.00917431	166	0	0	0.00206153		5	0
CG9344	2R:20977417	CDS	CT	0.634926	0.627329		0.00351866		0.000998004		0		0		No Reads		No Reads		1		No Reads		No Reads		0C 13T			157	1	0.00632911	106	0	0	87	0	0	314	3	0.00946372	187	1	0.00531915	174	0	0	0.00351866		2	0
CG9662	2L:3376197	CDS	CT	0.668961	0.637386		0		0		0.00326797		No Reads		0		No Reads		0		0		0		N			97	0	0	91	0	0	86	0	0	266	0	0	240	0	0	92	0	0	0		0	0
CG9743	3R:30198525	CDS	CT	0.756407	0.519027		0.449995		0.416025		0.394636		No Reads		0.387701		0.875		0.75		0.0833333		0.125		3C 3T			4	2	0.333333	4	14	0.777778	8	1	0.111111	22	39	0.639344	55	32	0.367816	9	8	0.470588	0.449995		0	0
CG9743	3R:30196715	CDS	CT	0.738762	0.571394		0.463925		0.469896		0.449537		0		0.363712		0.75		0.583333		0		0.166667		2C 6T			9	4	0.307692	7	6	0.461538	7	6	0.461538	31	58	0.651685	69	53	0.434426	16	14	0.466667	0.463925		1	0
CG9743	3R:30197276	CDS	CT	0.728869	0.588267		0		0		0		No Reads		0.0166667		0.208333		0		0		0		2C 5T			6	0	0	9	0	0	10	0	0	78	0	0	144	0	0	27	0	0	0		0	0
CG9917	X:16322693	CDS	CT	0.837562	0.808666		0.00410691		0.00217865		0		No Reads		0		0		0		0		0		N			48	0	0	58	1	0.0169492	58	0	0	129	1	0.00769231	133	0	0	47	0	0	0.00410691		1	0
cindr	3R:30825604	CDS	CT	0.723443	0.708847		1		1		1		0.348366		1		0.978492		1		1		1		1C 14T			0	21	1	0	16	1	0	20	1	0	69	1	0	83	1	0	43	1	1		10	7
Cnx99A	3R:29316771	CDS	CT	0.582866	0.664077		0.00133309		0.00332102		0.00149477		0		0.490196		1		1		0.690045		0.541667		0C 8T			501	0	0	444	1	0.00224719	310	1	0.00321543	1180	3	0.00253593	687	0	0	465	0	0	0.00133309		8	0
Cnx99A	3R:29316807	CDS	CT	0.564547	0.663518		0.00325856		0.00226353		0.00102881		0		0.5		1		1		0.679293		0.456583		0C 15T			461	2	0.00431965	453	0	0	322	1	0.00309598	1097	2	0.00181984	673	2	0.00296296	405	3	0.00735294	0.00325856		6	0
Coq7	X:6772477	CDS	CT	0.932401	0.852941		0.00185185		0		0		0		0.5		0		0		0		0		N			67	0	0	60	0	0	25	0	0	126	0	0	127	0	0	89	1	0.0111111	0.00185185		2	0
CycG	3R:31600574	CDS	CT	0.551009	0.555211		0.00201019		0		0.00176142		0		0		0.00490196		0		0.00793651		0.0108696		N			1388	0	0	1449	1	0.000689655	806	5	0.00616523	1806	2	0.00110619	1082	3	0.00276498	748	1	0.00133511	0.00201019		11	0
dj-1beta	3R:30807480	CDS	CT	0.583229	0.505654		0.995135		0.99791		0.933847		1		0.726852		0.25		0.5		0.944444		1		1C 4T			0	79	1	1	72	0.986301	0	76	1	1	196	0.994924	1	95	0.989583	0	110	1	0.995135		0	1
dnk	3R:18982055	CDS	CT	0.782153	0.934211		0.00694444		0.465043		0.260317		0		0.25		0.25		No Reads		No Reads		0		4C 3T			3	0	0	28	0	0	17	0	0	50	0	0	80	0	0	23	1	0.0416667	0.00694444		1	0
Etfb	3R:29802367	CDS	CT	0.635781	0.618803		0		0		0		No Reads		0.288876		0.702076		0.699405		0		0		N			58	0	0	43	0	0	28	0	0	47	0	0	73	0	0	64	0	0	0		1	0
fipi	2L:4738435	CDS	CT	0.606394	0		0.569862		0.545074		0.605398		0		0.5		0		0		0		0		N			33	43	0.565789	33	46	0.582278	26	26	0.5	35	52	0.597701	50	58	0.537037	20	35	0.636364	0.569862		2	0
Gabat	3L:19998290	CDS	CT	0.315858	0.286734		0.00188642		0.000617337		0.00958723		0		0		0		0		0		0		N			542	3	0.00550459	599	0	0	513	3	0.00581395	1161	0	0	872	0	0	489	0	0	0.00188642		7	0
GABPI	2L:3031624	CDS	CT	0.644486	0.696488		0.00263253		0.000995025		0.00262467		0		0		0		0		0		0		N			152	1	0.00653595	187	0	0	107	1	0.00925926	218	0	0	191	0	0	139	0	0	0.00263253		1	0
Gar1	2R:21097118	CDS	CT	0.787013	0.637034		No Reads		0.428788		0.777778		No Reads		1		No Reads		1		1		No Reads		0C 2T			0	4	1	0	0	#DIV/0!	0	6	1	4	14	0.777778	3	11	0.785714	11	4	0.266667	#DIV/0!		0	0
Gbeta13F	X:15862401	CDS	CT	0.59511	0.484523		0.995619		0.99643		0.995568		1		0		0		0		0		0		N			6	2221	0.997306	7	1751	0.996018	7	1485	0.995308	18	3608	0.995036	2	1940	0.99897	13	1444	0.991078	0.995619		0	32
GCS2alpha	X:21600923	CDS	CT	0.660504	0.631294		0.482865		0.32534		0.0346035		0.562937		0.5		1		0.8		0		0		0C 8T			453	352	0.437267	465	330	0.415094	210	242	0.535398	671	502	0.427962	257	343	0.571667	300	312	0.509804	0.482865		3	8
GCS2alpha	X:21600924	CDS	CT	0.659058	0.630633		0.482811		0.323743		0.0367061		0.562937		0.5		1		0.8		0		0		0C 8T			454	353	0.437423	462	333	0.418868	207	242	0.538976	675	499	0.425043	263	344	0.566722	299	311	0.509836	0.482811		3	8
GCS2alpha	X:21600960	CDS	CT	0.655625	0.635103		0.486031		0.326696		0.035731		0.787179		0.5		1		1		0		0		0C 5T			578	377	0.394764	515	417	0.447425	276	272	0.49635	700	537	0.434115	281	375	0.571646	268	358	0.571885	0.486031		0	7
Gdh	3R:23942634	CDS	CT	0.599475	0.56626		0.488292		0.468299		0.4574		1		0.5		0.972871		0.986842		0.991525		0.988295		0C 6T			534	471	0.468657	702	557	0.442415	400	463	0.536501	418	384	0.478803	243	291	0.544944	228	193	0.458432	0.488292		0	37
Gdi	2L:9494388	CDS	CT	0.515624	0.541576		0.001623		0.000852168		0.000757576		0		0.678365		0.393596		0.187356		0		0		3C 8T			1616	2	0.00123609	1563	0	0	1382	2	0.00144509	2100	11	0.0052108	1132	1	0.000882613	1037	1	0.000963391	0.001623		3	0
geminin	2R:6655929	CDS	CT	0.676253	0.996732		0		0		0		No Reads		0		0		No Reads		No Reads		0		N			72	0	0	46	0	0	49	0	0	88	0	0	188	0	0	55	0	0	0		0	0
gkt	2L:3160588	CDS	CT	0.887164	0.963675		0		0		0		No Reads		0		0		0		1		No Reads		N			32	0	0	30	0	0	22	0	0	170	0	0	125	0	0	32	0	0	0		0	0
Gp93	3R:27951370	CDS	CT	0.635706	0.693355		0		0.000704722		0.00182149		No Reads		0.5		1		1		0		0		0C 10T			218	0	0	212	0	0	179	0	0	467	0	0	473	0	0	242	0	0	0		1	0
Gp93	3R:27949217	CDS	CT	0.630125	0.652918		0.505928		0.488707		0.537705		No Reads		0.5		1		0.977273		1		1		0C14T			80	66	0.452055	80	78	0.493671	64	59	0.479675	72	82	0.532468	119	98	0.451613	43	72	0.626087	0.505928		1	0
Gp93	3R:27951702	CDS	CT	0.625023	0.707115		0.00343741		0		0		0		0.5		1		1		0		0.0333333		0C 12T			284	1	0.00350877	246	1	0.00404858	218	0	0	544	2	0.003663	653	3	0.00457317	206	1	0.00483092	0.00343741		9	0
Gyg	2R:21206981	CDS	CT	0.732006	0.945082		No Reads		0		0		0		No Reads		1		1		0		0		0C 9T			5	0	0	5	0	0	2	0	0	0	0	#DIV/0!	15	0	0	9	0	0	#DIV/0!		32	0
Gyg	2R:21204848	CDS	CT	0.69985	0.768761		0.025641		0		0		0		0.5		0.977778		1		0		0		1C 10T			15	0	0	10	0	0	2	0	0	22	0	0	59	0	0	22	4	0.153846	0.025641		8	0
Gyg	2R:21204704	CDS	CT	0.695275	0.730196		0.0111111		0		0		0		0.5		1		1		0.00746269		0		0C 6T			12	0	0	14	1	0.0666667	3	0	0	24	0	0	43	0	0	12	0	0	0.0111111		1	0
Gyg	2R:21204756	CDS	CT	0.694096	0.659515		0		0		0		0		0.5		1		1		0		0		0C 7T			12	0	0	11	0	0	1	0	0	16	0	0	41	0	0	18	0	0	0		4	0
Gyg	2R:21205488	CDS	CT	0.677616	0.688529		No Reads		0.405359		0.531481		0.0123457		0.5		1		1		1		1		0C 20T			5	4	0.444444	1	7	0.875	0	0	#DIV/0!	20	20	0.5	4	11	0.733333	5	20	0.8	#DIV/0!		48	0
Gyg	2R:21205499	CDS	CT	0.674598	0.762222		0.712945		0.430857		0.557143		0		0.5		1		1		1		1		0C 21T			5	3	0.375	1	6	0.857143	0	1	1	20	21	0.512195	4	11	0.733333	5	20	0.8	0.712945		41	0
Gyg	2R:21205165	CDS	CT	0.592734	0.762541		0.600536		0.474854		0.583333		0		0.5		1		1		1		1		0C 14T			2	4	0.666667	10	6	0.375	1	3	0.75	11	18	0.62069	7	24	0.774194	7	5	0.416667	0.600536		13	0
Hacd2	2L:13444550	CDS	CT	0.792537	0.728146		0		0		0		0		0.15		0.0416667		0.180556		0		0		8C 3T			76	0	0	67	0	0	56	0	0	178	0	0	167	0	0	66	0	0	0		3	0
HUWE1	X:15730447	CDS	CT	0.843264	0.80129		0.435337		0		0		0.498121		0.6701		0		0		0.0384615		1		N			12	0	0	9	3	0.25	2	4	0.666667	81	33	0.289474	30	72	0.705882	9	21	0.7	0.435337		87	36
igl	2R:15188904	CDS	CT	0.795215	0.676326		0.477111		0.502689		0.488293		0		0.00333333		0		0		0		0		N			771	705	0.477642	504	485	0.490394	560	508	0.475655	511	412	0.446371	282	289	0.50613	183	160	0.466472	0.477111		20	0
kay	3R:29792061	CDS	CT	0.782139	0.749976		0.411419		0.549218		0.488889		No Reads		0.829091		0.563816		0.719828		0.0865248		0.0949074		2C 7T			23	10	0.30303	23	23	0.5	19	15	0.441176	81	48	0.372093	26	21	0.446809	22	15	0.405405	0.411419		0	1
l(2)k09913	2R:23071468	CDS	CT	0.656125	0.582816		0.000952047		0.00316307		0.00600601		0		0.216132		0.390179		0.2		0		0		4C 4T			310	0	0	237	0	0	234	0	0	722	2	0.00276243	676	2	0.00294985	265	0	0	0.000952047		12	0
Lamp1	2L:21576154	CDS	CT	0.268992	0.365172		0.00629342		0.00363636		0		0		0		0		0		0		0		N			364	1	0.00273973	353	7	0.0194444	316	5	0.0155763	664	0	0	201	0	0	200	0	0	0.00629342		6	0
Lcp3	2R:8435574	CDS	CT	0	0		No Reads		No Reads		No Reads		No Reads		No Reads		No Reads		No Reads		No Reads		No Reads		N			0	0	#DIV/0!	0	0	#DIV/0!	0	0	#DIV/0!	0	0	#DIV/0!	0	0	#DIV/0!	0	0	#DIV/0!	#DIV/0!		0	0
Lcp3	2R:8435576	CDS	CT	0	0		No Reads		No Reads		No Reads		No Reads		No Reads		No Reads		No Reads		No Reads		No Reads		N			0	0	#DIV/0!	0	0	#DIV/0!	0	0	#DIV/0!	0	0	#DIV/0!	0	0	#DIV/0!	0	0	#DIV/0!	#DIV/0!		0	0
Letm1	2R:24510326	CDS	CT	0.871762	0.89665		0.618708		0.342593		0.826331		0.981481		0.5		0		0		1		1		0C 6T			9	4	0.307692	3	9	0.75	2	8	0.8	32	35	0.522388	13	9	0.409091	1	12	0.923077	0.618708		0	17
LSm3	3R:23996939	CDS	CT	0.794793	0.668655		0.497545		0.54895		0.436797		No Reads		No Reads		No Reads		No Reads		No Reads		No Reads		N			24	34	0.586207	24	23	0.489362	28	27	0.490909	69	53	0.434426	62	36	0.367347	36	58	0.617021	0.497545		4	0
mago	2R:21129183	CDS	CT	0.645119	0.728038		0		0		0		0		0.5		1		No Reads		0		0		0C 9T			57	0	0	78	0	0	61	0	0	147	0	0	123	0	0	117	0	0	0		2	0
mago	2R:21129177	CDS	CT	0.637027	0.730661		0		0		0		0		0.5		1		No Reads		0		0		0C 7T			58	0	0	78	0	0	63	0	0	154	0	0	110	0	0	115	0	0	0		4	0
Map60	2R:9591701	CDS	CT	0.801845	0.780044		0		0		0		No Reads		0.416667		0.6		1		0		0		2C 5T			92	0	0	86	0	0	78	0	0	87	0	0	115	0	0	35	0	0	0		1	0
mEFTu1	2R:13508697	CDS	CT	0.755479	0.858101		0.997789		0.996412		0.992373		No Reads		0		0		0		0		0		N			1	204	0.995122	0	167	1	0	102	1	1	328	0.99696	0	281	1	1	186	0.994652	0.997789		1	0
mEFTu1	2R:13509042	CDS	CT	0.724475	0.815449		0.999191		1		1		1		0		0		0		0		0		N			0	198	1	0	148	1	0	96	1	0	312	1	0	329	1	1	205	0.995146	0.999191		0	8
Mgstl	X:21043805	CDS	CT	0.600938	0.565581		0.692729		0.468547		0.567821		0.555556		0.5		1		1		0		1		5C 9T			47	174	0.78733	31	83	0.72807	24	79	0.76699	203	215	0.514354	116	229	0.663768	125	286	0.695864	0.692729		0	2
Mlc2	3R:30173047	CDS	CT	0.556459	0.533029		No Reads		No Reads		No Reads		0		0.116429		0.274758		0.196671		0		0.00120192		9C 3T			1	0	0	2	0	0	2	0	0	0	0	#DIV/0!	0	0	#DIV/0!	0	0	#DIV/0!	#DIV/0!		21	0
mlt	2R:10157534	CDS	CT	0.800367	0.689621		0.996599		1		1		0		0.388793		0.871892		0.75625		0		0		2C 9T			0	31	1	0	44	1	0	19	1	0	40	1	0	77	1	1	48	0.979592	0.996599		3	0
mod	3R:32054073	CDS	CT	0.665508	0.731068		0.00259403		0		0.00584795		0.5		0		0		0.0833333		0		0		N			253	4	0.0155642	307	0	0	189	0	0	350	0	0	291	0	0	168	0	0	0.00259403		1	0
mRpL28	2L:4974809	CDS	CT	0.859945	0		0.000724638		0		0		0		0		0		0		0		0		N			52	0	0	51	0	0	52	0	0	209	0	0	229	1	0.00434783	91	0	0	0.000724638		4	0
mRpL54	2R:21061371	CDS	CT	0.892451	0.890443		0.426576		0.570222		0.516138		0		1		1		No Reads		1		1		1C 12T			38	21	0.355932	30	19	0.387755	22	19	0.463415	47	41	0.465909	25	54	0.683544	55	14	0.202899	0.426576		1	0
mRpS16	2R:14173148	CDS	CT	0.655668	0.723032		0.410439		0.481405		0.387511		No Reads		0.5		1		No Reads		0		No Reads		0C 17T			11	12	0.521739	13	14	0.518519	14	7	0.333333	43	25	0.367647	41	26	0.38806	14	7	0.333333	0.410439		6	0
mRpS28	2R:18614289	CDS	CT	0.737888	0.798957		0.46506		0.554621		0.387818		No Reads		0		No Reads		No Reads		0		0		N			28	33	0.540984	38	28	0.424242	10	19	0.655172	74	28	0.27451	40	48	0.545455	26	14	0.35	0.46506		4	0
nclb	2R:10876325	CDS	CT	0.81739	0.801629		0.996377		1		1		No Reads		0.5		0		0		0		0		N			1	45	0.978261	0	69	1	0	31	1	0	50	1	0	147	1	0	26	1	0.996377		1	0
ND-20	X:15986405	CDS	CT	0.403873	0.453286		0.00652841		0.00396535		0.00800794		0		0		0		0		0		0		N			351	4	0.0112676	362	2	0.00549451	286	2	0.00694444	565	0	0	319	0	0	191	3	0.0154639	0.00652841		1	0
Ndg	2R:10320814	CDS	CT	1	0.4		No Reads		0		0		No Reads		0.463636		0.691667		0		0		0		8C 13T			1	0	0	1	0	0	0	0	#DIV/0!	4	0	0	1	0	0	1	0	0	#DIV/0!		2	0
Ndg	2R:10321308	CDS	CT	1	0.871212		No Reads		0		No Reads		No Reads		No Reads		No Reads		0		0		0		5C 8T			1	0	0	0	0	#DIV/0!	2	0	0	2	0	0	1	0	0	0	0	#DIV/0!	#DIV/0!		1	0
Nna1	X:13713433	CDS	CT	0.171429	0.436355		0		0		No Reads		0		0		0		0		0		0		N			10	0	0	4	0	0	7	0	0	4	0	0	1	0	0	7	0	0	0		18	0
Npl4	3R:25623086	CDS	CT	0.708057	0.821408		0		0		0		0.416667		0.35625		0.732172		0.453571		0		0		10C 13T			173	0	0	144	0	0	111	0	0	189	0	0	136	0	0	139	0	0	0		2	0
Npl4	3R:25611368	CDS	CT	0.673363	0.728124		0		0		0.0128205		No Reads		0.314145		0.626587		0.65		0.512987		0.535714		4C 10T			110	0	0	92	0	0	90	0	0	230	0	0	119	0	0	119	0	0	0		0	1
para	X:16464364	CDS	CT	0.835564	0.693868		0		0.00193798		0		0		0		0		0		0		0		N			108	0	0	77	0	0	54	0	0	358	0	0	297	0	0	144	0	0	0		14	0
para	X:16464517	CDS	CT	0.813739	0.6008		0.00133869		0.00537634		0		0		0		0		0		0.0208333		0		N			78	0	0	56	0	0	32	0	0	298	0	0	247	2	0.00803213	92	0	0	0.00133869		29	0
para	X:16464415	CDS	CT	0.79034	0.707826		0		0		0.00980392		0		0		0		0		0		0		N			86	0	0	50	0	0	46	0	0	339	0	0	262	0	0	134	0	0	0		10	0
Pect	2L:13209737	CDS	CT	0.678927	0.615432		0.00182028		0.00117786		0		0.380087		1		1		0.988372		0		0		0C 12T			168	0	0	137	0	0	123	1	0.00806452	349	1	0.00285714	348	0	0	138	0	0	0.00182028		3	2
Pex11ab	2R:15991737	CDS	CT	0.563047	0.832539		0		0.004329		0.0136054		No Reads		0.5		1		1		0		0		0C 10T			34	0	0	61	0	0	21	0	0	90	0	0	70	0	0	54	0	0	0		1	0
Pex19	2L:12094088	CDS	CT	0.705786	0.693898		0.00192678		0.000493827		0.00616022		No Reads		0.0252525		0.03125		0.142857		1		1		7C 2T			235	0	0	171	2	0.0115607	141	0	0	225	0	0	173	0	0	131	0	0	0.00192678		0	0
PI31	2R:11967614	CDS	CT	0.808568	0.671392		0.470049		0.495236		0.535645		0		0		0		0		0.516667		0.1		N			53	61	0.535088	60	40	0.4	24	31	0.563636	80	124	0.607843	155	48	0.236453	46	42	0.477273	0.470049		3	0
Pisd	3R:24053108	CDS	CT	0.964672	0.889309		0		0		0		0		0		0.0166667		0		1		1		N			17	0	0	15	0	0	18	0	0	41	0	0	118	0	0	25	0	0	0		3	0
PMCA	4:349103	CDS	CT	0.361929	0.415285		0.00138327		0.00109246		0		0		0		0		0		0		0.00438596		N			457	1	0.00218341	540	0	0	420	0	0	113	0	0	650	4	0.00611621	481	0	0	0.00138327		63	0
pnut	2R:8238250	CDS	CT	0.739596	0.722767		0		0.0029789		0		No Reads		0.301587		0.577877		0.444444		0		0		2C 5T			172	0	0	110	0	0	132	0	0	253	0	0	165	0	0	96	0	0	0		0	0
pnut	2R:8239511	CDS	CT	0.693606	0.6227		0.00160324		0		0		0		0.238688		0.408654		0.633333		0		0		N			177	0	0	154	0	0	136	1	0.00729927	430	1	0.00232019	319	0	0	160	0	0	0.00160324		2	0
pnut	2R:8238224	CDS	CT	0.656314	0.654742		0.00253022		0.00217865		0		No Reads		0.3125		0.553968		0.55		0		0		3C 4T			160	0	0	99	1	0.01	105	0	0	192	1	0.00518135	133	0	0	68	0	0	0.00253022		0	0
Polr2E	2R:10898437	CDS	CT	0.690782	0.624894		0.583967		0.486914		0.504983		No Reads		0		No Reads		No Reads		0		0		N			37	33	0.471429	33	31	0.484375	14	28	0.666667	68	80	0.540541	36	90	0.714286	31	52	0.626506	0.583967		2	0
Prx6b	2R:10425361	CDS	CT	0.601909	0		No Reads		No Reads		No Reads		No Reads		0.031015		No Reads		No Reads		0		0		6C 2T			0	0	#DIV/0!	3	0	0	0	0	#DIV/0!	0	0	#DIV/0!	6	0	0	0	0	#DIV/0!	#DIV/0!		0	0
Prx6c	2R:10418962	CDS	CT	1	0		No Reads		No Reads		No Reads		No Reads		0.0631579		No Reads		No Reads		0.125		0		N			0	0	#DIV/0!	1	0	0	0	0	#DIV/0!	0	0	#DIV/0!	0	0	#DIV/0!	1	0	0	#DIV/0!		0	0
Prx6c	2R:10419235	CDS	CT	1	0		No Reads		No Reads		No Reads		No Reads		0.507422		No Reads		0.572727		0.235511		0.207498		7C 2T			0	0	#DIV/0!	1	0	0	0	0	#DIV/0!	0	0	#DIV/0!	0	0	#DIV/0!	0	0	#DIV/0!	#DIV/0!		0	0
Ptp99A	3R:29483336	CDS	CT	0.892532	0.8325		0.53587		0.384717		0.402778		0.926496		0.367761		0.629474		0.663818		0.582846		0.471429		5C 10T			8	11	0.578947	22	21	0.488372	13	11	0.458333	51	45	0.46875	44	35	0.443038	2	7	0.777778	0.53587		1	14
Rack1	2L:7826869	CDS	CT	0.609095	0.539754		0.00129301		0.000776294		0.00129079		No Reads		0.0173224		0		0		0		0		N			8103	4	0.000493401	5108	9	0.00175884	5615	9	0.00160028	9741	17	0.00174216	4595	5	0.00108696	4640	5	0.00107643	0.00129301		0	1
Rack1	2L:7825976	CDS	CT	0.581972	0.524573		0.0023358		0.000975589		0.00096497		1		0.0154148		0		0		0		0.0147059		N			1237	10	0.00801925	7411	7	0.000943651	8533	5	0.000585617	15533	48	0.00308068	7000	5	0.000713776	7437	5	0.000671862	0.0023358		0	2
RanBP3	3R:23752091	CDS	CT	0.815116	0.586525		0		0		0.0740741		No Reads		0		0		0		1		1		N			27	0	0	36	0	0	22	0	0	50	0	0	42	0	0	18	0	0	0		0	0
RanBP3	3R:23751272	CDS	CT	0.770367	0.691026		0.00234742		0.00392157		0		No Reads		0.577381		No Reads		0.2		1		1		N			29	0	0	40	0	0	11	0	0	84	0	0	70	1	0.0140845	36	0	0	0.00234742		0	0
REG	X:13213496	CDS	CT	0.812651	0.678565		0.99847		0.999189		0.994898		1		0.5		0		No Reads		0		1		N			2	372	0.994652	0	246	1	1	260	0.996169	0	317	1	0	260	1	0	152	1	0.99847		0	4
RFeSP	2L:1612914	CDS	CT	0.571736	0.605202		0.000813592		0.000476495		0.00155039		0		0		0		0		0		0		N			768	1	0.00130039	561	1	0.00177936	475	0	0	948	0	0	803	0	0	554	1	0.0018018	0.000813592		6	0
Ric	2R:16108853	CDS	CT	0.592081	0.55994		0.475857		0.493633		0.523173		1		0.5		0		0		1		1		N			1505	1511	0.500995	1361	1267	0.482116	859	977	0.532135	860	871	0.503177	664	393	0.371807	488	424	0.464912	0.475857		0	29
RNaseZ	2R:10307378	CDS	CT	0.897463	1		0.0262626		0.151515		0		0		No Reads		0		No Reads		0		No Reads		N			13	0	0	14	1	0.0666667	8	0	0	39	0	0	94	0	0	20	2	0.0909091	0.0262626		1	0
Rpi	2R:23355830	CDS	CT	0.637531	0.756269		0.00114943		0.00036075		0.0021645		No Reads		0		0.0625		0		0		0		N			173	0	0	239	0	0	160	0	0	432	3	0.00689655	364	0	0	155	0	0	0.00114943		0	0
Rpn2	3R:29156392	CDS	CT	0.502796	0.436318		0.00727634		0		0.0158665		0		0		0		0		0		0		N			209	1	0.0047619	178	0	0	88	0	0	412	14	0.0328638	431	1	0.00231481	268	1	0.00371747	0.00727634		3	0
Rpn6	2R:14751322	CDS	CT	0.628602	0.520345		0.52248		0.504306		0.485318		0		0		0.0277778		0		0		0		N			195	164	0.456825	160	166	0.509202	106	135	0.560166	165	184	0.527221	167	184	0.524217	116	146	0.557252	0.52248		5	0
Rpn9	3R:23732279	CDS	CT	0.644487	0.582254		0.00344555		0.00185707		0.0120726		0		0		0		0		0.984375		1		N			230	0	0	161	0	0	161	2	0.0122699	436	0	0	425	0	0	236	2	0.00840336	0.00344555		2	0
RpS15Ab	2R:10821843	CDS	CT	0.378529	0.358917		0.513312		0.436911		0.425961		No Reads		0.0527778		No Reads		No Reads		0		0		N			433	329	0.431759	296	213	0.418468	281	212	0.43002	64	91	0.587097	28	48	0.631579	44	61	0.580952	0.513312		1	0
RpS15Ab	2R:10822054	CDS	CT	0.230391	0.285078		0.289353		0.194851		0.319644		0		No Reads		0		No Reads		0		0		N			426	91	0.176015	260	76	0.22619	264	80	0.232558	46	40	0.465116	37	13	0.26	63	38	0.376238	0.289353		1	0
RpS15Ab	2R:10821980	CDS	CT	0.185438	0.201764		0.315604		0.277519		0.268232		No Reads		0		No Reads		No Reads		0		No Reads		N			279	123	0.30597	248	76	0.234568	248	87	0.259701	49	24	0.328767	31	19	0.38	64	40	0.384615	0.315604		1	0
Scamp	X:15447785	CDS	CT	0.797323	0.746307		0.00196243		0.00318056		0		0.0952381		0		0		0.05		0		0.958333		N			204	1	0.00487805	149	0	0	157	0	0	476	0	0	327	0	0	144	1	0.00689655	0.00196243		6	1
Sec10	3R:24137167	CDS	CT	0.868931	0.832032		1		0.984127		1		0.0333333		0.5		0		0		0		0		N			0	13	1	0	16	1	0	14	1	0	42	1	0	45	1	0	10	1	1		5	0
shi	X:15896426	CDS	CT	0.762988	0.809011		0.000509013		0.000956758		0.00070028		0		0.00510204		0		0		0.00357143		0		N			1018	1	0.000981354	871	0	0	654	0	0	1159	1	0.000862069	825	1	0.00121065	449	0	0	0.000509013		48	0
shot	2R:13885702	CDS	CT	0.885714	0.805431		No Reads		No Reads		No Reads		0.366012		1		1		0.991594		0		0		0C 22T			4	0	0	6	0	0	0	0	#DIV/0!	0	0	#DIV/0!	0	0	#DIV/0!	2	0	0	#DIV/0!		22	13
shot	2R:13886075	CDS	CT	0.885531	0.854626		No Reads		0		No Reads		0		0.5		1		1		0		0		0C 18T			0	0	#DIV/0!	1	0	0	3	0	0	0	0	#DIV/0!	0	0	#DIV/0!	6	0	0	#DIV/0!		60	0
shot	2R:13884851	CDS	CT	0.809152	0.752377		No Reads		No Reads		No Reads		0		0.480769		0.994565		1		0		0		0C 13T			0	0	#DIV/0!	1	0	0	1	0	0	43	0	0	0	0	#DIV/0!	3	0	0	#DIV/0!		10	0
shot	2R:13885256	CDS	CT	0.781819	0.725742		No Reads		No Reads		No Reads		0		0.5		0.990434		0.991228		0		0		0C 8T			1	0	0	2	0	0	0	0	#DIV/0!	11	0	0	0	0	#DIV/0!	4	0	0	#DIV/0!		12	0
shot	2R:13881704	CDS	CT	0.765152	0.714736		No Reads		No Reads		No Reads		0		0.5		0.999023		1		0		0.0020202		0C 11T			0	0	#DIV/0!	0	0	#DIV/0!	0	0	#DIV/0!	6	0	0	0	0	#DIV/0!	1	0	0	#DIV/0!		8	0
shot	2R:13881605	CDS	CT	0.72436	0.748468		No Reads		No Reads		No Reads		0		0.5		0.993816		0.998433		0		0		0C 11T			0	0	#DIV/0!	0	0	#DIV/0!	0	0	#DIV/0!	2	0	0	0	0	#DIV/0!	2	0	0	#DIV/0!		7	0
sip3	3R:31773591	CDS	CT	0.891659	0.876471		0		0		0		0.611111		0		0		0		0		0		N			36	0	0	23	0	0	20	0	0	66	0	0	48	0	0	58	0	0	0		2	1
Snx21	2L:2764361	CDS	CT	0.562208	0.431606		0		0		0		No Reads		0		0		0		0		0		N			15	0	0	21	0	0	10	0	0	94	0	0	27	0	0	21	0	0	0		3	0
Snx21	2L:2764378	CDS	CT	0.366673	0.29333		0.0486432		0.00900901		0.0151515		0		0		0		No Reads		0		0		N			19	1	0.05	21	3	0.125	18	0	0	95	1	0.0104167	32	2	0.0588235	20	1	0.047619	0.0486432		2	0
Sou	2R:21016832	CDS	CT	0.717184	0.625792		0		0.00740741		0		No Reads		0.5		1		1		0		0		0C 8T			32	0	0	52	0	0	26	0	0	50	0	0	48	0	0	34	0	0	0		0	0
Spn55B	2R:18126718	CDS	CT	0.787061	0.691789		0.585575		0.550761		0.503545		No Reads		0		No Reads		0		0		0		N			8	17	0.68	9	24	0.727273	7	7	0.5	65	44	0.40367	65	57	0.467213	9	25	0.735294	0.585575		0	0
Syx1A	3R:24104150	CDS	CT	0.701377	0.73967		0.511333		0.495962		0.53653		0.00209644		0		0		0		0		0		N			167	171	0.505917	177	160	0.474777	133	123	0.480469	310	297	0.489292	201	265	0.56867	120	146	0.548872	0.511333		137	0
Syx1A	3R:24104402	CDS	CT	0.692571	0.736433		0.500516		0.485769		0.515449		0		0		0		0		0		0		N			170	167	0.495549	159	162	0.504673	156	135	0.463918	309	255	0.452128	217	278	0.561616	113	125	0.52521	0.500516		17	0
Syx1A	3R:24103871	CDS	CT	0.656306	0.600909		0.522746		0.480609		0.481082		0.0010352		0		0		0		0		0		N			289	272	0.484848	230	271	0.540918	210	206	0.495192	489	541	0.525243	445	549	0.552314	213	248	0.537961	0.522746		341	0
tei	2R:13746594	CDS	CT	0.820916	0.777674		0		0		0.0555556		0.292589		0.5		0		0		1		1		N			17	0	0	13	0	0	8	0	0	52	0	0	57	0	0	52	0	0	0		24	7
ThrRS	2L:12106330	CDS	CT	0.65811	0.549524		0.995655		0.998579		0.993287		1		0.513889		1		1		1		1		0C 5T			0	418	1	3	263	0.988722	1	248	0.995984	5	1057	0.995292	6	983	0.993933	0	316	1	0.995655		0	2
ThrRS	2L:12105826	CDS	CT	0.652746	0.534754		0.531898		0.501374		0.526701		No Reads		0.0607843		0.111111		0.0384615		1		1		N			318	290	0.476974	183	153	0.455357	140	170	0.548387	468	516	0.52439	277	601	0.68451	141	142	0.501767	0.531898		0	0
ThrRS	2L:12105272	CDS	CT	0.626015	0.500166		0.00215872		0.000220751		0		No Reads		0		0		0		1		1		N			477	2	0.00417537	318	0	0	285	0	0	924	2	0.00215983	865	2	0.00230681	231	1	0.00431034	0.00215872		1	0
Tpi	3R:30133383	CDS	CT	0.535058	0.549342		0.000730316		0.00120212		0.00165486		0		0.167031		0.282011		0.385		0.016129		0.0192308		N			4270	1	0.000234137	4115	1	0.000242954	3351	5	0.00148987	5145	8	0.00155249	2801	0	0	2317	2	0.000862441	0.000730316		3	0
twit	2L:20856551	CDS	CT	0.432534	0.575463		0.00138846		0.00105208		0.00179664		0.5867		0.5		No Reads		1		No Reads		0		N			865	1	0.00115473	838	1	0.0011919	614	1	0.00162602	2191	5	0.00227687	1012	1	0.000987167	913	1	0.00109409	0.00138846		4	5
Uba1	2R:9691630	CDS	CT	0.717102	0.644437		0.00464853		0		0		0		0.417973		0.831522		0.85188		0.00925926		0		1C 13T			145	2	0.0136054	126	0	0	69	1	0.0142857	144	0	0	92	0	0	53	0	0	0.00464853		1	0
Ube4B	2L:13013738	CDS	CT	0.795873	0.704389		0		0		0		No Reads		0.105699		0.458333		0.222222		0		0		N			11	0	0	19	0	0	8	0	0	23	0	0	54	0	0	27	0	0	0		4	0
Ubi-p5E	X:6277447	CDS	CT	0.417582	0.656726		0.075404		0.0790634		0.0760349		0		0.000317259		0		0		0		0.00149254		N			6560	629	0.0874948	6374	512	0.0743538	4257	353	0.0765727	10665	895	0.0774221	3695	243	0.0617064	3855	312	0.074874	0.075404		5	0
unc79	3R:19245264	CDS	CT	0.897839	0.783512		0		0.49697		No Reads		0.741044		0.221154		0.529771		0.594542		1		1		3C 5T			18	0	0	15	0	0	12	0	0	3	0	0	4	0	0	11	0	0	0		26	93
unc79	3R:19231784	CDS	CT	0.811449	0.985714		0		0.543981		0.415975		0.25		0.5		1		1		1		1		0C 22T			63	0	0	100	0	0	41	0	0	231	0	0	200	0	0	87	0	0	0		4	4
Vha100-1	3R:29135687	CDS	CT	0.705273	0.639395		0.000984283		0.000631313		0.0020202		0		0.5		1		1		0		0		0C 11T			503	1	0.00198413	356	0	0	285	0	0	508	2	0.00392157	292	0	0	237	0	0	0.000984283		11	0
VhaAC39-1	X:3882174	CDS	CT	0.53321	0.535587		0.0143615		0.0122194		0.0125929		0		0.00645833		0		0.02		0.0108696		0.025		N			1084	6	0.00550459	891	18	0.019802	693	12	0.0170213	822	36	0.041958	513	0	0	530	1	0.00188324	0.0143615		14	0
VhaAC45RP	3R:30166113	CDS	CT	0.645817	0.619821		0.000435187		0.000438734		0.0002886		0		0.138115		0		0		0		0		11C 4T			1976	2	0.00101112	1848	0	0	1386	0	0	1697	0	0	679	0	0	624	1	0.0016	0.000435187		2	0
VhaAC45RP	3R:30165876	CDS	CT	0.628228	0.604117		0.00427863		0.000458415		0.000283206		No Reads		0.120514		0.325871		0.228801		0		0		6C 4T			2189	5	0.00227894	1895	3	0.00158061	1581	3	0.00189394	1837	1	0.00054407	820	5	0.00606061	667	9	0.0133136	0.00427863		3	0
witty	2L:8338461	CDS	CT	0.507036	0.687037		0.386075		0.432016		0.466163		0		0		0		0		0		0		N			35	38	0.520548	20	11	0.354839	27	19	0.413043	95	79	0.454023	64	22	0.255814	75	35	0.318182	0.386075		3	0
Xrp1	3R:18920813	CDS	CT	0.658456	0.615497		0		0.442558		0.497663		0		0.269965		0.486588		0.505082		0		0		6C 7T			255	0	0	155	0	0	183	0	0	244	0	0	208	0	0	136	0	0	0		14	0
Yeti	2R:1344823	CDS	CT	0.385975	0.20777		0.00204488		0.00150797		0.00310138		0		0		0.0108696		0		0		0		N			1049	6	0.0056872	699	0	0	716	3	0.00417246	828	2	0.00240964	872	0	0	425	0	0	0.00204488		16	0
Yif1	3R:26719531	CDS	CT	0.769399	0.905053		0		0		0.015873		1		1		1		1		1		No Reads		0C 8T			27	0	0	15	0	0	10	0	0	68	0	0	61	0	0	19	0	0	0		0	1
Zip99C	3R:29864429	CDS	CT	0.90669	0.86954		0		0		0		No Reads		0.31891		0.66131		0.708333		0		0		7C 7T			35	0	0	12	0	0	4	0	0	42	0	0	31	0	0	18	0	0	0		3	0
Act42A	2R:6014646	CDS	GA	0.315038	0.151623		0.00159698		0.000836902		0.00132747		0		0		0		0		0		0		N			6970	20	0.00286123	6324	14	0.0022089	5289	7	0.00132175	4505	4	0.000887115	2734	1	0.000365631	2576	5	0.00193723	0.00159698		4	0
Act5C	X:5902926	CDS	GA	0	0		0.00158767		0.00214395		0.00214136		0		0.00128595		0		0		0		0		N			31106	67	0.0021493	22554	26	0.00115146	18564	22	0.00118369	15808	18	0.00113737	7544	14	0.00185234	6809	14	0.00205188	0.00158767		14	0
Ald1	3R:26257733	CDS	GA	0.538128	0.604953		0.479342		0.495339		0.495313		0		0.5		0.998521		0.994406		0.00174825		0		0G 6A			34298	33435	0.493629	27893	25507	0.477659	21188	20274	0.488978	24758	22804	0.479458	11595	9982	0.462622	11888	10700	0.473703	0.479342		21	0
amon	3R:26703754	CDS	GA	0.693589	0.581152		0.000340136		0		0.00260417		0		0.987805		0.960602		0.86958		0		0		0G 11A			563	0	0	489	1	0.00204082	330	0	0	440	0	0	254	0	0	168	0	0	0.000340136		5	0
Ank2	3L:7668267	CDS	GA	0.376618	0.323104		0.0248188		0.0225146		0.0185185		0.00617618		0		0.00201613		0.00666667		0		0		N			18	0	0	23	0	0	13	2	0.133333	119	1	0.00833333	137	1	0.00724638	57	0	0	0.0248188		386	3
Asph	2R:16111996	CDS	GA	0.571429	0.992188		No Reads		0		No Reads		0		0.5		1		1		0		0		0G 22A			0	0	#DIV/0!	0	0	#DIV/0!	1	0	0	0	0	#DIV/0!	0	0	#DIV/0!	1	0	0	#DIV/0!		3	0
ATPsynCF6	3R:23355666	CDS	GA	0.551082	0.516741		0.000783083		0.00160517		0.013133		0		0		0		0.016129		1		1		N			996	1	0.00100301	746	0	0	788	1	0.00126743	1577	2	0.00126662	751	0	0	860	1	0.00116144	0.000783083		11	0
ATPsynCF6	3R:23355404	CDS	GA	0.545443	0.492433		0.00061063		0.000957226		0.0087293		0		0.00257732		0		0		1		1		N			816	0	0	661	0	0	610	1	0.00163666	1226	1	0.000814996	611	0	0	824	1	0.00121212	0.00061063		14	0
bbc	2R:13494274	CDS	GA	0.825955	0.878977		0.382264		0.479253		0.562247		0		0		0		0		0		0		N			55	38	0.408602	51	32	0.385542	47	26	0.356164	39	44	0.53012	56	41	0.42268	17	4	0.190476	0.382264		4	0
betaTub56D	2R:19447599	CDS	GA	0.304181	0.248717		0.00629529		0.00504873		0.00736031		0		0		0		0		0		0		N			28343	172	0.00603191	25347	178	0.00697356	20243	116	0.00569773	34318	177	0.00513118	16174	95	0.00583933	17883	146	0.00809806	0.00629529		26	0
betaTub60D	2R:24312078	CDS	GA	0	0.422274		0		0		0		No Reads		0		0		0		0		0		N			45	0	0	46	0	0	45	0	0	56	0	0	34	0	0	26	0	0	0		1	0
Bhmt	2L:18956775	CDS	GA	0.860775	0.741176		0		0		0		No Reads		0		0		0.0454545		0		0		N			11	0	0	6	0	0	3	0	0	14	0	0	39	0	0	11	0	0	0		1	0
bigmax	3R:27287824	CDS	GA	0.829292	0.869604		0		0		0		No Reads		0		0		0		0		0		N			19	0	0	8	0	0	6	0	0	26	0	0	37	0	0	13	0	0	0		1	0
Brd7-9	2L:7783345	CDS	GA	0.872014	0.914634		0		0		0		0.6		0.125		0		No Reads		1		No Reads		N			51	0	0	43	0	0	42	0	0	86	0	0	85	0	0	53	0	0	0		2	4
bsk	2L:10248296	CDS	GA	0.33993	0.299499		0.00241255		0.000204876		0.00110375		0		0		0		0		0		0		N			846	2	0.00235849	740	0	0	499	0	0	802	2	0.00248756	752	2	0.00265252	427	3	0.00697674	0.00241255		8	0
CCT6	X:15747608	CDS	GA	0.638703	0.630762		0.000884173		0		0		No Reads		0		0		0		1		0		N			375	2	0.00530504	219	0	0	167	0	0	735	0	0	416	0	0	258	0	0	0.000884173		0	0
Cdc50	X:16440335	CDS	GA	0.66415	0.654607		0.00277402		0.00250161		0.00942739		0		0		0		0		0		0		N			253	0	0	210	1	0.00473934	201	0	0	408	0	0	249	3	0.0119048	230	0	0	0.00277402		3	0
Cdc50	X:16440745	CDS	GA	0.287485	0.292335		0.000801282		0.000788955		0		0		0		0		0.0384615		0		0		N			217	0	0	202	0	0	155	0	0	340	0	0	207	1	0.00480769	165	0	0	0.000801282		1	0
Ced-12	2L:12100412	CDS	GA	0.740208	0.720721		0.432204		0.607895		0.540404		1		0.5		1		1		1		1		0G 10A			6	3	0.333333	9	3	0.25	3	4	0.571429	1	9	0.9	10	0	0	6	7	0.538462	0.432204		0	10
CG10098	3R:7125013	CDS	GA	0.271265	0.268566		0.00554589		0.00429775		0.00452489		0		0		0		0		0		0		N			783	4	0.00508259	663	4	0.005997	678	1	0.00147275	778	11	0.0139417	520	2	0.00383142	338	1	0.00294985	0.00554589		3	0
CG10098	3R:7124741	CDS	GA	0.221505	0.265009		0.0217415		0.0229421		0.0308564		0		0		0		0		0		0		N			451	17	0.0363248	426	12	0.0273973	435	16	0.0354767	470	10	0.0208333	285	3	0.0104167	263	0	0	0.0217415		1	0
CG10527	2R:21070769	CDS	GA	0.219463	0.226506		0.00455056		0.00232654		0.00414426		0		0.0107323		0.03125		0		0.0121951		0.031746		N			1017	10	0.0097371	890	9	0.0100111	870	1	0.00114811	2782	9	0.00322465	1211	3	0.00247117	1405	1	0.000711238	0.00455056		5	0
CG12159	2R:7916058	CDS	GA	0.49654	0.31255		0		0		0.00740741		0		0		0		No Reads		0		0		N			53	0	0	44	0	0	59	0	0	159	0	0	62	0	0	61	0	0	0		2	0
CG12935	2R:10810327	CDS	GA	0.912455	0.723782		0		0		0		No Reads		No Reads		No Reads		No Reads		0		0		N			16	0	0	9	0	0	17	0	0	104	0	0	78	0	0	27	0	0	0		0	0
CG13016	2R:14158285	CDS	GA	0.990476	0.777427		0		0		0		No Reads		No Reads		No Reads		No Reads		0		0		0G 17A			20	0	0	8	0	0	18	0	0	55	0	0	71	0	0	34	0	0	0		1	0
CG13603	3R:23985903	CDS	GA	0.630912	0.476351		0.0717054		0.051347		0.0983406		0		0		0		0		0.125		1		N			106	14	0.116667	96	11	0.102804	93	5	0.0510204	182	2	0.0108696	130	3	0.0225564	83	12	0.126316	0.0717054		2	0
CG15514	3R:29860573	CDS	GA	0.772695	0.78434		0.00177305		0		0		No Reads		0.166667		0.8		0.633333		0		0		5G 9A			28	0	0	39	0	0	20	0	0	56	0	0	93	1	0.0106383	27	0	0	0.00177305		1	0
CG17593	2L:3516924	CDS	GA	0.668264	0.855235		0		0.00330033		0		0		0		0		0		0		0		N			44	0	0	38	0	0	27	0	0	55	0	0	125	0	0	34	0	0	0		9	0
CG1983	3R:30177261	CDS	GA	0.707667	0.714283		0.478963		0.395216		0.266162		No Reads		0.394737		0.875		0.25		0		0		3G 7A			33	16	0.326531	10	21	0.677419	8	11	0.578947	82	59	0.41844	67	60	0.472441	21	14	0.4	0.478963		1	0
CG2269	2R:10094332	CDS	GA	0.671665	0.603185		0.000965438		0.000775277		0.00107569		1		0.364338		0.807138		0.702116		0		0		8G 14A			6417	3	0.00046729	4486	10	0.0022242	4110	3	0.000729395	4325	4	0.000924001	2204	2	0.000906618	1847	1	0.000541126	0.000965438		0	31
CG30423	2R:24875438	CDS	GA	0.320911	0.303355		0.000616017		0.000901048		0		0		0		0		0		0.0333333		0		N			810	2	0.00246305	810	1	0.00123305	949	0	0	1048	0	0	586	0	0	626	0	0	0.000616017		5	0
CG31705	2L:11524089	CDS	GA	0.749453	0.733308		0.0145936		0		0		No Reads		0.498718		0.988221		1		0.171573		0.223262		0G 6A			20	0	0	14	0	0	12	1	0.0769231	93	1	0.0106383	149	0	0	20	0	0	0.0145936		0	0
CG31717	2L:10251478	CDS	GA	0.399164	0.217298		0.0014245		0.00127226		0.00793651		No Reads		0		No Reads		No Reads		0		0		N			135	0	0	94	0	0	92	0	0	116	1	0.00854701	215	0	0	101	0	0	0.0014245		0	0
CG31717	2L:10251442	CDS	GA	0.32694	0.308024		0		0.00403226		0.0520833		No Reads		0		No Reads		0		0		0		N			109	0	0	85	0	0	80	0	0	124	0	0	204	0	0	90	0	0	0		0	0
CG33303	2L:10375194	CDS	GA	0.714609	0.746588		0.463898		0.402359		0.454018		No Reads		1		0.916667		1		0.65		0.8125		0G 16A			154	133	0.463415	180	117	0.393939	75	53	0.414062	290	148	0.3379	83	122	0.595122	48	66	0.578947	0.463898		0	2
CG3556	X:4532434	CDS	GA	0.872746	0.482759		0.768821		0.460791		0.791438		0.638889		0.5		0.940476		0.944444		0		0		0G 6A			42	348	0.892308	31	266	0.895623	30	165	0.846154	299	516	0.633129	196	290	0.596708	63	188	0.749004	0.768821		2	2
CG3702	2L:4224992	CDS	GA	0.73689	0		0		0.00311526		0.00438596		0		0		0		0		1		1		N			51	0	0	86	0	0	64	0	0	215	0	0	149	0	0	96	0	0	0		2	0
CG3760	2R:24939115	CDS	GA	0.562531	0.453742		0.0352249		0.0161052		0.00997024		No Reads		0.0125		0		0		0		0.0416667		N			115	3	0.0254237	106	4	0.0363636	90	2	0.0217391	283	17	0.0566667	211	15	0.0663717	208	1	0.00478469	0.0352249		0	0
CG3792	2L:4978071	CDS	GA	0.722168	0		0.00157233		0.00372136		0		0.666667		0.5		0		0		0		0		N			105	1	0.00943396	56	0	0	48	0	0	152	0	0	138	0	0	62	0	0	0.00157233		1	0
CG41128	3R:3750485	CDS	GA	0.281348	0.335615		0.0256245		0.0248841		0.0148443		0		0.031138		0		0.1		0.0416667		0		N			218	6	0.0267857	212	7	0.0319635	257	8	0.0301887	296	6	0.0198675	336	2	0.00591716	197	8	0.0390244	0.0256245		2	0
CG42376	X:255282	CDS	GA	0.522135	0.626884		0.0673206		0.0711504		0.0650253		0		0.0131579		0		0		0		No Reads		N			105	2	0.0186916	58	2	0.0333333	60	16	0.210526	209	14	0.0627803	116	6	0.0491803	66	2	0.0294118	0.0673206		7	0
CG42376	X:255174	CDS	GA	0.452442	0.333215		0		0		0		0		0		0		0		0		0		N			98	0	0	53	0	0	58	0	0	228	0	0	111	0	0	68	0	0	0		7	0
CG42518	2R:18168240	CDS	GA	0.648052	0.624691		0.547506		0.561117		0.532848		0		0.486111		0		0		0		0		N			16	40	0.714286	30	26	0.464286	21	35	0.625	114	71	0.383784	61	80	0.567376	31	35	0.530303	0.547506		2	0
CG44245	2R:21212018	CDS	GA	0.651074	0.953517		0		0.00268817		0		0		0.5		1		1		0		0		0G 7A			36	0	0	32	0	0	18	0	0	172	0	0	95	0	0	57	0	0	0		23	0
CG44245	2R:21211826	CDS	GA	0.630004	0.965961		0		0.00546448		0		0		0.5		1		1		0		0		0G 10A			33	0	0	21	0	0	13	0	0	114	0	0	79	0	0	41	0	0	0		6	0
CG5056	2L:10367257	CDS	GA	0.897017	0.856459		0.498105		0.444523		0.662741		0		No Reads		0.9375		0.857143		0.85		0.9		0G 15A			10	7	0.411765	16	12	0.428571	17	15	0.46875	33	22	0.4	19	36	0.654545	6	10	0.625	0.498105		2	0
CG5056	2L:10367136	CDS	GA	0.854854	0.902607		0.428259		0.425747		0.512418		No Reads		0.46875		0.9375		No Reads		0.5		1		0G 7A			16	12	0.428571	11	6	0.352941	15	21	0.583333	28	22	0.44	16	18	0.529412	13	4	0.235294	0.428259		2	2
CG5554	2R:23846494	CDS	GA	0.383254	0.291479		0.000813008		0.00441247		0.00430807		0		0		0.0166667		0		0.016129		0		N			268	0	0	204	1	0.00487805	180	0	0	381	0	0	334	0	0	185	0	0	0.000813008		9	0
CG5902	3R:23987955	CDS	GA	0.662109	0.692667		0.00231481		0.00330033		0		No Reads		0		0		0		1		1		N			81	0	0	71	1	0.0138889	65	0	0	172	0	0	176	0	0	102	0	0	0.00231481		0	0
CG6000	3R:24054519	CDS	GA	0.768663	0.768274		0		0		0		No Reads		No Reads		0		No Reads		1		1		N			33	0	0	20	0	0	15	0	0	94	0	0	77	0	0	17	0	0	0		2	0
CG7601	3R:29735639	CDS	GA	0.891429	0.989247		0.491605		0.538441		0.428337		No Reads		1		0.875		1		0.5		0.333333		0G 13A			5	6	0.545455	7	4	0.363636	5	6	0.545455	1	21	0.954545	17	20	0.540541	4	0	0	0.491605		2	0
CG8206	X:15739549	CDS	GA	0.812472	0.849062		0.981481		1		1		No Reads		0.5		0		0		0		1		N			0	28	1	1	8	0.888889	0	19	1	0	41	1	0	46	1	0	20	1	0.981481		0	1
CG9743	3R:30197375	CDS	GA	0.676526	0.547489		0		0		0		No Reads		0.125		0.395833		0.1875		0.2		0.0833333		6G 2A			3	0	0	11	0	0	7	0	0	65	0	0	112	0	0	38	0	0	0		1	0
CG9917	X:16322363	CDS	GA	0.896769	0.802036		0.00110375		0.0026455		0		No Reads		0.00641026		0		0		0		0		N			71	0	0	84	0	0	67	0	0	199	0	0	150	1	0.00662252	70	0	0	0.00110375		0	0
cm	X:7010629	CDS	GA	0.935897	0.61322		1		1		1		1		1		1		1		0		1		0G 11A			0	36	1	0	31	1	0	25	1	0	36	1	0	42	1	0	42	1	1		0	1
cm	X:7010382	CDS	GA	0.891484	0.636905		1		1		1		No Reads		1		1		1		No Reads		1		0G 7A			0	23	1	0	48	1	0	34	1	0	30	1	0	47	1	0	35	1	1		0	2
cm	X:7010409	CDS	GA	0.882784	0.60454		0.757709		0.487817		0.574619		0		0.5		1		1		No Reads		1		0G 8A			0	24	1	10	28	0.736842	9	25	0.735294	9	20	0.689655	18	29	0.617021	10	33	0.767442	0.757709		1	0
Coq7	X:6772903	CDS	GA	1	0.872549		0		0		0		No Reads		0.25		0		0		0		1		N			53	0	0	60	0	0	33	0	0	154	0	0	88	0	0	132	0	0	0		4	0
Cow	3R:23075169	CDS	GA	0.705295	0.570415		0.000594783		0.000721243		0.00873079		0		0.142472		0.217381		0.410969		0		0.0283019		N			628	0	0	581	0	0	489	1	0.00204082	1307	2	0.00152788	833	0	0	381	0	0	0.000594783		53	0
Cow	3R:23075298	CDS	GA	0.653182	0.558959		0.00167791		0.00261317		0.00570776		0		0.162173		0.272741		0.293211		0		0		4G 4A			481	1	0.00207469	469	1	0.00212766	339	2	0.0058651	850	0	0	570	0	0	295	0	0	0.00167791		27	0
COX5A	3R:11819814	CDS	GA	0.292561	0.149951		0.00151909		0.00110728		0.0066394		0		0.00169444		0		0		0		0		N			1328	3	0.00225394	1142	3	0.00262009	1022	1	0.000977517	1412	3	0.00212014	874	1	0.00114286	707	0	0	0.00151909		8	0
Ctl2	3R:29127795	CDS	GA	0.731209	0.617163		0		0		0		0		0.979167		1		1		0.3		0.125		0G 8A			9	0	0	6	0	0	8	0	0	39	0	0	32	0	0	22	0	0	0		2	0
dnk	3R:18982088	CDS	GA	0.831749	0.942308		0		0.448352		0.320794		No Reads		0.283333		No Reads		No Reads		No Reads		0		8G 4A			2	0	0	28	0	0	14	0	0	53	0	0	76	0	0	21	0	0	0		0	0
drk	2R:13497407	CDS	GA	0.750635	0.741152		0.529203		0.469811		0.476977		0.583578		0		0		0		0		0		N			98	72	0.423529	69	70	0.503597	76	87	0.533742	106	233	0.687316	115	153	0.570896	93	78	0.45614	0.529203		7	9
eIF2Balpha	3R:29935238	CDS	GA	0.893769	0.766623		0.00340136		0.00456621		0		No Reads		0.3		No Reads		0.458333		0		No Reads		5G 5A			23	0	0	30	0	0	27	0	0	80	0	0	48	1	0.0204082	42	0	0	0.00340136		0	0
Etfb	3R:29802282	CDS	GA	0.625319	0.67152		0.00320513		0		0		No Reads		0.289867		0.635599		0.568182		0		0		1G 4A			51	1	0.0192308	38	0	0	33	0	0	63	0	0	84	0	0	68	0	0	0.00320513		0	0
Fas1	3R:16631728	CDS	GA	0.55203	0.621032		0.0498939		0.022133		0.0288066		0		0		0.00347222		0		0		0		N			277	2	0.00716846	131	6	0.0437956	161	18	0.100559	244	3	0.0121457	185	2	0.0106952	112	16	0.125	0.0498939		48	0
Fer2LCH	3R:30390223	CDS	GA	0.547688	0.560139		0.00166486		0.000748297		0.000645208		0		0.11081		0.252237		0.076087		0		0		6G 3A			5056	8	0.00157978	3157	7	0.00221239	3582	3	0.00083682	4286	8	0.00186306	2314	1	0.000431965	1301	4	0.00306513	0.00166486		35	0
Fer2LCH	3R:30389925	CDS	GA	0.151943	0.237375		0.00221773		0.00205506		0.00401955		0		0.0154051		0.0632331		0.102781		0.0714183		0.0901864		N			4295	10	0.00232288	2504	9	0.00358138	2940	8	0.0027137	2906	3	0.00103128	1677	5	0.00297265	1460	1	0.000684463	0.00221773		20	0
Fim	X:17286832	CDS	GA	0.873873	0.640489		0.99725		1		1		1		0.5		0		0		0		0		N			1	79	0.9875	0	85	1	0	61	1	0	202	1	1	249	0.996	0	92	1	0.99725		0	1
fl(2)d	2R:13820617	CDS	GA	0.710866	0.892968		0		0		0		0		0		0		0		0		0		N			39	0	0	46	0	0	28	0	0	64	0	0	41	0	0	37	0	0	0		5	0
Flo1	2R:15567324	CDS	GA	0.622005	0.9375		0.475567		0.456454		0.416322		1		0.5		0		0		0		0		N			141	175	0.553797	163	122	0.42807	111	98	0.4689	318	310	0.493631	277	288	0.509735	164	109	0.399267	0.475567		0	3
Frq1	X:18161233	CDS	GA	0.201843	0.184182		0.0206553		0.0177298		0.0361243		0		0		0.04794		0		0		0		N			376	8	0.0208333	344	8	0.0227273	301	8	0.02589	854	15	0.0172612	699	17	0.023743	366	5	0.0134771	0.0206553		23	0
galectin	2L:76030	CDS	GA	0.565597	0.708884		0.0753356		0.0671279		0.0946731		0		0		0.0119048		0.0208333		0		0.00925926		N			27	3	0.1	65	5	0.0714286	35	0	0	141	11	0.0723684	122	4	0.031746	56	12	0.176471	0.0753356		19	0
gkt	2L:3161176	CDS	GA	1	0.957071		0		0		0		No Reads		0		No Reads		0		0		No Reads		N			52	0	0	55	0	0	25	0	0	233	0	0	169	0	0	33	0	0	0		0	0
gkt	2L:3160300	CDS	GA	0.925275	0.939286		0.00108932		0		0		0		0		0		0		0		0		N			29	0	0	33	0	0	23	0	0	181	0	0	152	1	0.00653595	30	0	0	0.00108932		3	0
Gp93	3R:27949680	CDS	GA	0.655	0.630465		0.544787		0.493368		0.526793		No Reads		0.5		1		1		1		1		0G 9A			112	118	0.513043	98	168	0.631579	91	96	0.513369	89	148	0.624473	209	142	0.404558	64	89	0.581699	0.544787		0	0
Gycalpha99B	3R:29685225	CDS	GA	0.772459	0.789815		0.523452		0.51128		0.526167		0		0.992424		1		1		0.542609		0.45		0G 11A			379	397	0.511598	417	526	0.557794	299	324	0.520064	401	457	0.532634	304	365	0.54559	254	228	0.473029	0.523452		4	0
Gyg	2R:21205460	CDS	GA	0.680309	0.594725		0		0		0		0		0.5		1		1		0		0		0G 20A			16	0	0	8	0	0	1	0	0	45	0	0	18	0	0	27	0	0	0		37	0
Hacd2	2L:13444846	CDS	GA	0.792503	0.756592		0		0.00165837		0		0		0.261905		0.0871212		0.0454545		1		1		N			84	0	0	97	0	0	62	0	0	171	0	0	113	0	0	72	0	0	0		8	0
Hacd2	2L:13444699	CDS	GA	0.784546	0.74629		0.00674953		0		0.0561529		0		0.0357143		0.219371		0.1		1		1		N			57	0	0	73	0	0	42	1	0.0232558	148	0	0	144	0	0	57	1	0.0172414	0.00674953		15	0
Hmg-2	2R:21147451	CDS	GA	0.848026	0.974359		0.00333333		0		0.0133333		No Reads		0.5		1		1		0		0		0G 16A			19	0	0	25	0	0	13	0	0	49	1	0.02	31	0	0	32	0	0	0.00333333		1	0
Hmu	3R:27290540	CDS	GA	0.626933	0.602193		0.004485		0.00182072		0		0		0.5		0		0		0		0		N			495	2	0.00402414	310	0	0	236	0	0	846	4	0.00470588	729	2	0.00273598	255	4	0.015444	0.004485		9	0
Hrd3	3R:23754868	CDS	GA	0.721241	0.778342		0		0		0		1		0.613248		0.125		No Reads		0.875		1		5G 3A			9	0	0	24	0	0	8	0	0	19	0	0	54	0	0	43	0	0	0		0	2
Hsp27	3L:9384781	CDS	GA	0.281968	0.135695		0.00236676		0.00242731		0.00313125		0		No Reads		No Reads		No Reads		No Reads		No Reads		N			6362	17	0.00266499	5886	17	0.00287989	4498	10	0.00221828	6641	10	0.00150353	3504	11	0.00312945	2766	5	0.0018044	0.00236676		11	0
Hydr2	2L:3167039	CDS	GA	0.945652	0.894231		0.00125313		0		0.0222222		No Reads		0		0		0		0		0		N			138	0	0	83	0	0	57	0	0	130	0	0	132	1	0.0075188	81	0	0	0.00125313		0	0
Iswi	2R:12640241	CDS	GA	0.958048	0.796543		0.48701		0.369035		0.438596		0		0.0902778		No Reads		No Reads		0		0		6G 2A			22	14	0.388889	10	12	0.545455	10	9	0.473684	55	51	0.481132	46	39	0.458824	23	31	0.574074	0.48701		14	0
Iswi	2R:12640302	CDS	GA	0.944444	0.824464		0.349146		0.393193		0.361397		0		0.0166667		No Reads		0.8		No Reads		0		9G 4A			37	12	0.244898	31	12	0.27907	22	5	0.185185	78	70	0.472973	43	41	0.488095	42	31	0.424658	0.349146		19	0
janA	3R:30039263	CDS	GA	0.720886	0.61639		0.00118203		0.00318979		0		No Reads		0.402381		0.875		No Reads		0		No Reads		5G 2A			140	1	0.0070922	83	0	0	92	0	0	226	0	0	222	0	0	62	0	0	0.00118203		0	0
lost	3R:4405274	CDS	GA	0.360322	0.254342		0.023843		0.0200934		0.0104571		0		0.00409836		0		0		0		0.0104167		N			710	9	0.0125174	607	6	0.00978793	410	14	0.0330189	563	12	0.0208696	375	12	0.0310078	242	9	0.0358566	0.023843		4	0
Lpin	2R:8137640	CDS	GA	0.728894	0.562934		0.00703176		0.00281358		0.0234732		0		0.303846		0.572619		0.473214		0		0		6G 6A			171	2	0.0115607	179	4	0.0218579	113	1	0.00877193	536	0	0	283	0	0	190	0	0	0.00703176		3	0
mago	2R:21129039	CDS	GA	0.629448	0.757547		0.00163399		0.0034188		0		0		0.5		1		No Reads		No Reads		0		0G 20A			59	0	0	85	0	0	63	0	0	103	0	0	101	1	0.00980392	94	0	0	0.00163399		6	0
mago	2R:21129186	CDS	GA	0.625998	0.722561		0		0		0		No Reads		0.5		1		No Reads		0		0		0G 9A			56	0	0	78	0	0	61	0	0	150	0	0	123	0	0	118	0	0	0		0	0
Map60	2R:9591043	CDS	GA	0.726732	0.838967		0		0		0		No Reads		0.464286		0.964286		0.625		0		0		1G 9A			84	0	0	47	0	0	44	0	0	74	0	0	97	0	0	32	0	0	0		1	0
Mdh1	2L:10394275	CDS	GA	0.200273	0.451566		0.00234321		0.0010523		0.0015873		0		0.00241546		0.0119048		0		0.00819672		0		N			143	0	0	91	0	0	97	0	0	434	3	0.00686499	233	0	0	138	1	0.00719424	0.00234321		2	0
miple1	3L:268336	CDS	GA	0.231686	0.266028		0.00229689		0.00281695		0.00210725		0		0.0128949		0.00390625		0.00531915		0.00617284		0.00675676		N			4969	4	0.000804343	4600	4	0.00086881	3730	6	0.001606	2751	1	0.000363372	1306	12	0.0091047	966	1	0.00103413	0.00229689		85	0
mRpL22	X:16784909	CDS	GA	0.704305	0.845449		0.996078		1		1		1		0.5		1		1		1		1		0G 15A			0	58	1	0	43	1	0	42	1	0	142	1	0	97	1	2	83	0.976471	0.996078		0	4
mRpL54	2R:21061167	CDS	GA	0.834757	0.902126		0.437964		0.547412		0.490873		No Reads		1		No Reads		1		No Reads		No Reads		0G 9A			32	22	0.407407	28	27	0.490909	29	22	0.431373	62	45	0.420561	23	37	0.616667	34	12	0.26087	0.437964		0	0
mRpS5	3L:24542458	CDS	GA	0.398777	0.576134		0.111974		0.0974585		0.139886		0.010101		0.00735294		0		0		0.0128205		0		N			275	40	0.126984	282	18	0.06	289	25	0.0796178	292	19	0.0610932	190	71	0.272031	193	15	0.0721154	0.111974		27	0
Mtmr6	2R:23390218	CDS	GA	0.651884	0.808174		0.479985		0.430049		0.524552		0		0.5		0		0.0238095		1		1		N			72	67	0.482014	59	68	0.535433	50	40	0.444444	107	103	0.490476	118	116	0.495726	50	38	0.431818	0.479985		5	0
ncm	2L:18445794	CDS	GA	0.770093	0.854851		0.00191571		0		0		0		No Reads		0		No Reads		0		No Reads		N			14	0	0	16	0	0	15	0	0	59	0	0	86	1	0.0114943	55	0	0	0.00191571		4	0
Neb-cGP	X:10460939	CDS	GA	0.216785	0.159657		0.00121279		0.00146466		0.00233878		0		0.00625		0		0		0		0		N			2657	4	0.00150319	2297	0	0	2629	6	0.00227704	2314	2	0.000863558	1390	0	0	1894	5	0.00263296	0.00121279		7	0
Nsun5	3R:19162194	CDS	GA	0.772895	0.868173		0		0.481174		0.606532		No Reads		0.125		0.1875		No Reads		0		0		13G 3A			54	0	0	34	0	0	31	0	0	54	0	0	69	0	0	44	0	0	0		0	0
Ntan1	2R:18641543	CDS	GA	0.8541	0.806504		0.047619		0		0		No Reads		0.5		1		1		0.0714286		0.0833333		0G 7A			7	0	0	12	0	0	10	0	0	27	0	0	16	0	0	15	6	0.285714	0.047619		0	0
Ntan1	2R:18641716	CDS	GA	0.846954	0.805036		0.00340136		0		0		No Reads		0.982143		1		1		0		0		0G 9A			5	0	0	10	0	0	3	0	0	48	1	0.0204082	28	0	0	12	0	0	0.00340136		0	0
Opa1	2R:14230920	CDS	GA	0.795512	0.840381		0		0.00343643		0		0		0.240385		0.579708		0.544118		0		0		11G 9A			75	0	0	35	0	0	45	0	0	128	0	0	147	0	0	79	0	0	0		14	0
p23	3R:9678727	CDS	GA	0.153536	0.174843		0.0114941		0.010153		0.0187277		0		0.00543478		0.0833333		0		0		0		N			994	14	0.0138889	820	4	0.00485437	667	14	0.020558	1539	42	0.0265655	1167	2	0.00171086	720	1	0.00138696	0.0114941		3	0
Pcmt	3R:5554023	CDS	GA	0.529871	0.587027		0.0026455		0.00172712		0		0		0		0		0		0		0		N			70	0	0	44	0	0	62	1	0.015873	161	0	0	194	0	0	88	0	0	0.0026455		2	0
Pex19	2L:12094055	CDS	GA	0.703598	0.699219		0		0.00100251		0.00611621		No Reads		0.0214912		0.0833333		0.0357143		1		1		N			226	0	0	159	0	0	114	0	0	237	0	0	189	0	0	106	0	0	0		0	0
Pex19	2L:12094556	CDS	GA	0.664746	0.708981		0.000586854		0.00117687		0		No Reads		0		0		0		1		1		N			274	0	0	188	0	0	162	0	0	283	1	0.00352113	334	0	0	189	0	0	0.000586854		2	0
Pfk	2R:10116445	CDS	GA	0.571116	0.671596		0.494879		0.499181		0.510395		1		0.913557		0.74055		0.814935		0		0		2G 3A			261	314	0.546087	320	244	0.432624	200	185	0.480519	397	413	0.509877	305	242	0.442413	134	169	0.557756	0.494879		0	3
phyl	2R:14428349	CDS	GA	0.752433	1		0.488975		0.445081		0.441084		0		0		No Reads		0		0		0		N			92	83	0.474286	68	64	0.484848	75	81	0.519231	157	173	0.524242	172	143	0.453968	92	84	0.477273	0.488975		23	0
PI31	2R:11967911	CDS	GA	0.859492	0.72808		0.501557		0.465562		0.467053		No Reads		0.5		No Reads		0		1		1		N			76	75	0.496689	65	57	0.467213	32	42	0.567568	72	141	0.661972	138	45	0.245902	43	57	0.57	0.501557		2	0
pix	3L:8972845	CDS	GA	0.285127	0.274558		0.000872093		0.000364299		0.00425835		0		0		0		0		0		0		N			532	0	0	558	2	0.00357143	363	0	0	676	0	0	601	1	0.00166113	339	0	0	0.000872093		3	0
Rack1	2L:7826967	CDS	GA	0.590971	0.52303		0.00131616		0.00051179		0.00119951		No Reads		0.0180067		0		0		0		0		N			11265	12	0.00106411	6550	6	0.000915192	7391	17	0.00229482	11749	12	0.00102032	5155	7	0.00135606	5609	7	0.00124644	0.00131616		0	2
RFeSP	2L:1612917	CDS	GA	0.567417	0.607809		0.00102738		0.000865716		0		0		0.00232558		0		0		0		0		N			774	0	0	565	1	0.00176678	475	1	0.00210084	946	1	0.00105597	805	1	0.00124069	554	0	0	0.00102738		6	0
RFeSP	2L:1613053	CDS	GA	0.566461	0.590507		0.000945352		0.000534945		0.00129057		0		0		0		0		0		0		N			860	1	0.00116144	730	1	0.00136799	610	1	0.00163666	1159	0	0	919	0	0	663	1	0.00150602	0.000945352		4	0
rhea	3L:8562736	CDS	GA	0.451088	0.430847		No Reads		0		0		0		0		0		0		0		0		N			3	0	0	5	0	0	4	0	0	15	0	0	0	0	#DIV/0!	1	0	0	#DIV/0!		19	0
Ric	2R:16108961	CDS	GA	0.55245	0.663392		0.451196		0.475854		0.492696		1		0.5		0		0		1		1		N			1281	1171	0.477569	1100	982	0.471662	806	773	0.48955	756	658	0.465347	530	352	0.399093	422	286	0.403955	0.451196		0	17
RpL10	3L:23093743	CDS	GA	0.13921	0.144204		0.0403086		0.0186053		0.0207593		0		No Reads		0		0		0		0		N			13647	329	0.0235404	11169	256	0.022407	11290	241	0.0209002	1014	184	0.153589	4973	50	0.00995421	5434	63	0.0114608	0.0403086		24	0
RpL40	2L:4228231	CDS	GA	0.502461	0.216652		0.00122291		0.000798781		0.00470961		0		0		0.00757576		0		0		0.0119048		N			16828	11	0.000653245	14393	23	0.00159545	14695	16	0.00108762	13989	14	0.000999786	6463	10	0.00154488	8227	12	0.00145649	0.00122291		19	0
RpL7	2L:10201284	CDS	GA	0.129356	0.159583		0.00353983		0.00371517		0.00596499		0		0		0		0		0		0		N			12163	42	0.00344121	9843	43	0.00434959	9185	47	0.00509099	11144	20	0.00179147	5160	16	0.00309119	6023	21	0.00347452	0.00353983		9	0
Rpn12	3L:16583236	CDS	GA	0.359382	0.222995		0.00520455		0.00231481		0		No Reads		0		0		0		0		0		N			98	0	0	91	0	0	61	0	0	171	0	0	152	1	0.00653595	79	2	0.0246914	0.00520455		0	0
Rpn6	2R:14751340	CDS	GA	0.622249	0.546346		0.000469484		0.000716846		0		0		0		0		0		0		0		N			351	0	0	357	0	0	228	0	0	354	1	0.0028169	372	0	0	264	0	0	0.000469484		4	0
RpS15Ab	2R:10822076	CDS	GA	0.34742	0.38814		0.431716		0.358246		0.450809		No Reads		0.0178571		0		No Reads		0		0		N			413	219	0.346519	286	148	0.341014	252	171	0.404255	49	73	0.598361	41	30	0.422535	70	64	0.477612	0.431716		2	0
RpS24	2R:22641033	CDS	GA	0.155757	0.160795		0.00184313		0.0024726		0.00486813		No Reads		0.000923065		0		0		0		0.0131579		N			8849	21	0.00236753	7137	8	0.00111966	7276	22	0.00301452	7244	15	0.0020664	3304	6	0.00181269	4422	3	0.000677966	0.00184313		0	0
Rpt5	3R:23754154	CDS	GA	0.576008	0.585215		0.00106157		0.00251748		0		1		0.09		No Reads		0.345238		1		1		8G 7A			176	0	0	156	1	0.00636943	119	0	0	354	0	0	323	0	0	193	0	0	0.00106157		0	3
Rtnl1	2L:5009310	CDS	GA	0.616803	0		0.00206387		0.000552792		0.00323804		0		0		0		0		0		0		N			271	0	0	205	0	0	196	0	0	289	0	0	188	1	0.00529101	140	1	0.0070922	0.00206387		3	0
S2P	2R:11843471	CDS	GA	0.398544	0.405028		0.023793		0		0		No Reads		0		0		0		0		0		N			51	1	0.0192308	50	0	0	22	1	0.0434783	115	1	0.00862069	57	0	0	39	3	0.0714286	0.023793		1	0
salr	2L:11373194	CDS	GA	0.772908	0.729341		0		0		0		0		0		0		0		0		No Reads		N			14	0	0	11	0	0	18	0	0	33	0	0	139	0	0	78	0	0	0		7	0
Sec13	3R:23358058	CDS	GA	0.803076	0.690789		0.000747384		0.00211313		0.00660066		0		0		0		0		1		1		N			126	0	0	113	0	0	92	0	0	444	2	0.0044843	305	0	0	159	0	0	0.000747384		1	0
sel	2R:10051845	CDS	GA	0.713575	0.85989		0		0.00952381		0		No Reads		0.252525		0.583333		0.875		0		No Reads		2G 13A			8	0	0	18	0	0	11	0	0	71	0	0	22	0	0	22	0	0	0		0	0
Sh3beta	3L:7367639	CDS	GA	0.419226	0.271419		0.00999628		0		0		0		0		0		0		0		0		N			207	0	0	158	0	0	141	0	0	240	0	0	222	12	0.0512821	114	1	0.00869565	0.00999628		37	0
shot	2R:13885220	CDS	GA	0.797107	0.753648		No Reads		No Reads		No Reads		0		0.5		1		0.995283		0		0		0G 15A			2	0	0	3	0	0	0	0	#DIV/0!	11	0	0	0	0	#DIV/0!	3	0	0	#DIV/0!		20	0
sls	3L:2057831	CDS	GA	0.125	0.2		No Reads		No Reads		No Reads		0.0238095		No Reads		No Reads		No Reads		0		No Reads		N			0	0	#DIV/0!	0	0	#DIV/0!	0	0	#DIV/0!	0	0	#DIV/0!	0	0	#DIV/0!	0	0	#DIV/0!	#DIV/0!		9	0
Snx21	2L:2764369	CDS	GA	0.445486	0.330495		0		0		0		No Reads		0		0		0		0		0		N			17	0	0	23	0	0	17	0	0	90	0	0	27	0	0	14	0	0	0		2	0
spas	3R:24039136	CDS	GA	0.650735	0.736079		0.0126421		0		0		0		0		0		0		1		1		N			42	0	0	54	2	0.0357143	40	0	0	125	2	0.015748	40	1	0.0243902	47	0	0	0.0126421		1	0
sqa	2R:9719090	CDS	GA	0.576687	0.713415		No Reads		No Reads		No Reads		No Reads		0.4375		0.657738		0.9		0		0		2G 11A			0	0	#DIV/0!	0	0	#DIV/0!	0	0	#DIV/0!	0	0	#DIV/0!	0	0	#DIV/0!	2	0	0	#DIV/0!		1	0
Syx1A	3R:24104201	CDS	GA	0.701847	0.754986		0.534098		0.484719		0.511938		0		0		0		0		0		0		N			204	255	0.555556	212	254	0.545064	174	171	0.495652	413	384	0.481807	254	334	0.568027	151	191	0.55848	0.534098		109	0
Tbcb	2R:19485997	CDS	GA	0.585432	0.342809		0.00459198		0.0105062		0.0127271		0		0		0		0		0		0		N			107	1	0.00925926	164	1	0.00606061	128	0	0	395	2	0.00503778	151	0	0	138	1	0.00719424	0.00459198		28	0
TfIIS	2L:15059878	CDS	GA	0.778186	0.729671		0.565225		0.530158		0.694103		No Reads		0		No Reads		No Reads		No Reads		No Reads		N			40	35	0.466667	42	38	0.475	26	55	0.679012	68	89	0.566879	34	53	0.609195	15	22	0.594595	0.565225		1	0
toc	2L:3127197	CDS	GA	0.940476	0.891026		0		0		0		0.00923077		0		0		0		1		0.995413		N			6	0	0	1	0	0	5	0	0	59	0	0	4	0	0	11	0	0	0		129	1
Torsin	X:4649401	CDS	GA	0.481399	0.616246		0		0.00212314		0		0		0		0		No Reads		0		0		N			96	0	0	104	0	0	92	0	0	150	0	0	171	0	0	96	0	0	0		1	0
Tpi	3R:30133353	CDS	GA	0.532608	0.543112		0.000991469		0.0012908		0.0019643		0		0.15537		0.238052		0.31993		0		0		N			4266	5	0.00117069	4140	6	0.00144718	3420	2	0.000584454	5352	6	0.00111982	2959	0	0	2455	4	0.00162668	0.000991469		4	0
TyrRS	3L:16418427	CDS	GA	0.286497	0.436247		0.00282486		0.00446056		0		No Reads		0		0		0		0		0		N			107	0	0	58	1	0.0169492	52	0	0	160	0	0	86	0	0	56	0	0	0.00282486		0	0
Ufc1	2R:16007213	CDS	GA	0.775262	0.739198		0.507468		0.533767		0.589626		0		0.5		1		1		0		0		0G 13A			93	66	0.415094	44	61	0.580952	36	44	0.55	67	100	0.598802	50	31	0.382716	56	60	0.517241	0.507468		1	0
unc79	3R:19231476	CDS	GA	0.840653	0.861378		0		0.547416		0.566239		0		0.257661		0.5375		0.522727		0		0		9G 3A			74	0	0	78	0	0	52	0	0	333	0	0	291	0	0	126	0	0	0		6	0
UQCR-14	X:16286722	CDS	GA	0.592337	0.560129		0.160071		0.116904		0.224351		0.583333		0.496347		0		0.0454545		0		0		N			1495	578	0.278823	1026	373	0.266619	969	381	0.282222	1797	97	0.0512144	1172	49	0.040131	949	41	0.0414141	0.160071		2	6
Urod	2R:9585539	CDS	GA	0.599029	0.764163		0		0		0		No Reads		0.416667		0.812689		0.875		0		0		1G 9A			55	0	0	58	0	0	45	0	0	163	0	0	170	0	0	74	0	0	0		1	0
VhaAC45RP	3R:30165428	CDS	GA	0.328646	0.239937		0.0016884		0.0018874		0.0014734		0		0		0		0		0		0		N			2241	5	0.00222618	2027	7	0.00344149	1535	4	0.00259909	2095	2	0.000953743	1098	1	0.000909918	959	0	0	0.0016884		2	0
wde	2R:10805625	CDS	GA	0.763892	0.730073		0.0014881		0		0		0		0		0		0		0		0		N			48	0	0	30	0	0	39	0	0	111	1	0.00892857	168	0	0	59	0	0	0.0014881		7	0
Xbp1	2R:21144020	CDS	GA	0.555518	0.608811		0.515765		0.463858		0.49236		0		0.5		1		1		0.993333		1		0G 1A			227	184	0.447689	229	221	0.491111	141	153	0.520408	254	255	0.500982	174	215	0.552699	64	89	0.581699	0.515765		11	0
Yif1	3R:26719582	CDS	GA	0.790308	0.860012		0		0		0		No Reads		0.941558		No Reads		0.75		1		No Reads		0G 13A			16	0	0	20	0	0	5	0	0	59	0	0	53	0	0	13	0	0	0		2	0
Yif1	3R:26719591	CDS	GA	0.783157	0.872278		0		0		0		No Reads		0.935606		0.875		1		1		No Reads		0G 11A			19	0	0	20	0	0	5	0	0	55	0	0	51	0	0	14	0	0	0		1	0
zfh1	3R:30785184	CDS	GA	0.806818	0.59509		0.584817		0.562393		0.303571		0		0.5		0		0		0		0		N			12	17	0.586207	4	7	0.636364	3	10	0.769231	13	18	0.580645	33	6	0.153846	5	18	0.782609	0.584817		3	0
zfh1	3R:30774397	CDS	GA	0.786667	0.682417		0.526949		0.666667		0.733333		No Reads		0.5		0.0833333		0		0		0		N			1	3	0.75	9	6	0.4	1	0	0	4	15	0.789474	0	4	1	7	2	0.222222	0.526949		0	0
Zip99C	3R:29864232	CDS	GA	0.87814	0.951952		0		0		0		0		0.333333		0.547222		0.75		0.0833333		0		4G 8A			22	0	0	15	0	0	9	0	0	30	0	0	26	0	0	37	0	0	0		1	0
Act5C	X:5902874	CDS	GC	0	0		0.000928945		0.000791574		0.00098768		0		0.00151875		0.00233645		0.00222222		0.00212766		0.00208333		N			26011	13	0.000499539	19588	10	0.000510256	16332	13	0.00079535	13522	9	0.000665139	6552	14	0.0021322	6172	6	0.000971188	0.000928945		23	0
Act5C	X:5902879	CDS	GC	0	0		0.000705693		0.000575463		0.000760267		0		0		0		0		0		0.00418417		N			27898	15	0.000537384	20799	18	0.000864678	17379	14	0.000804922	14492	10	0.00068956	6980	4	0.000572738	6532	5	0.000764877	0.000705693		22	0
Act5C	X:5902928	CDS	GC	0	0		0.00113981		0.00186139		0.00166732		0		0		0.00462963		0.00202429		0.00347878		0.00366423		N			30884	34	0.00109968	22325	26	0.00116326	18466	19	0.00102786	15667	10	0.000637877	7486	13	0.00173356	6791	8	0.00117664	0.00113981		15	0
Act5C	X:5903102	CDS	GC	0	0		0.00160503		0.00105027		0.00164435		0		0		0		0.00367647		0.00246305		0		N			35585	52	0.00145916	25070	60	0.00238758	20865	25	0.00119674	17561	27	0.00153514	8238	12	0.00145455	7502	12	0.00159702	0.00160503		2	0
Act87E	3R:13426785	CDS	GC	0.181818	0		No Reads		0		No Reads		No Reads		0		0		0		0		0		N			0	0	#DIV/0!	0	0	#DIV/0!	0	0	#DIV/0!	0	0	#DIV/0!	0	0	#DIV/0!	0	0	#DIV/0!	#DIV/0!		0	0
Act87E	3R:13426705	CDS	GC	0	0		No Reads		0		No Reads		No Reads		0		0		0		0		0.00238095		N			0	0	#DIV/0!	0	0	#DIV/0!	1	0	0	7	0	0	0	0	#DIV/0!	0	0	#DIV/0!	#DIV/0!		0	0
Act87E	3R:13426711	CDS	GC	0	0		No Reads		0		No Reads		0		0		0		0		0		0.00242718		N			0	0	#DIV/0!	0	0	#DIV/0!	0	0	#DIV/0!	6	0	0	0	0	#DIV/0!	0	0	#DIV/0!	#DIV/0!		1	0
Act87E	3R:13427008	CDS	GC	0	0		0		0		0		No Reads		0		0		0		0		0.00320513		N			44	0	0	54	0	0	51	0	0	36	0	0	8	0	0	26	0	0	0		0	0
Ank2	3L:7681088	CDS	GC	0.316769	0.366119		0.00620159		0.0191342		0		0.0278145		No Reads		0.000331126		0.000725689		0.00103306		0		N			161	3	0.0182927	38	0	0	21	0	0	279	2	0.00711744	335	4	0.0117994	68	0	0	0.00620159		756	26
AnxB10	X:20172179	CDS	GC	0.684289	0.639854		0.779813		0.576876		0.268254		1		0.492188		0		0		1		0		N			0	23	1	7	22	0.758621	1	13	0.928571	60	65	0.52	37	168	0.819512	16	30	0.652174	0.779813		0	3
Baldspot	3L:16650290	CDS	GC	0.375621	0.433246		0.00319232		0		0		0		0		0		0		0		0		N			330	1	0.00302115	239	0	0	178	2	0.0111111	349	1	0.00285714	461	1	0.0021645	244	0	0	0.00319232		21	0
betaTub60D	2R:24312033	CDS	GC	0.725958	0.809727		0.907424		0.996454		0.966952		No Reads		0.03125		0		0		0		0		N			12	44	0.785714	7	44	0.862745	6	50	0.892857	0	61	1	0	44	1	3	28	0.903226	0.907424		0	1
CCT6	X:15748628	CDS	GC	0.645176	0.591725		0.00115602		0.000479616		0		0		0		0		0		1		1		N			394	1	0.00253165	313	0	0	192	0	0	1052	0	0	608	1	0.00164204	361	1	0.00276243	0.00115602		11	0
Cdc50	X:16439671	CDS	GC	0.674996	0.63305		0.00152684		0.000741326		0		0		0		0		0		0		0		N			255	1	0.00390625	234	0	0	204	0	0	497	1	0.00200803	231	0	0	307	1	0.00324675	0.00152684		6	0
CG14207	X:19610764	CDS	GC	0.553877	0.532471		0.790329		0.474099		0.78105		1		0.5		1		1		0		0		0G 8C			21	165	0.887097	17	207	0.924107	26	124	0.826667	133	298	0.691415	41	209	0.836	69	94	0.576687	0.790329		0	6
CG16974	2L:13189517	CDS	GC	0.60588	0.655457		0.00387597		0		0		No Reads		0		1		1		0		0		0G 3C			42	1	0.0232558	57	0	0	42	0	0	36	0	0	34	0	0	42	0	0	0.00387597		3	0
CG2269	2R:10090645	CDS	GC	0.65974	0.695047		0.00102283		0.000563842		0.000968764		0		0.980395		1		1		0		0		0G 11C			4519	4	0.000884369	3099	5	0.00161082	2707	3	0.00110701	3182	6	0.00188206	1531	1	0.000652742	1546	0	0	0.00102283		4	0
CG3040	X:6972489	CDS	GC	0.805524	0.975		0.783886		0.374596		0.705882		No Reads		0		0		0		0		0		N			4	18	0.818182	4	22	0.846154	3	14	0.823529	17	75	0.815217	26	33	0.559322	7	37	0.840909	0.783886		5	0
CG33303	2L:10374889	CDS	GC	0.659834	0.757821		0.491693		0.456731		0.434537		No Reads		1		No Reads		1		0.708333		0.733333		0G 10C			143	119	0.454198	118	100	0.458716	68	74	0.521127	235	156	0.398977	94	120	0.560748	59	74	0.556391	0.491693		0	0
CG6766	2L:12039110	CDS	GC	0.620409	0.795675		0.000703235		0		0		No Reads		0		0		0		0.708333		0.845238		N			236	1	0.00421941	99	0	0	101	0	0	320	0	0	388	0	0	98	0	0	0.000703235		1	0
CG7601	3R:29735754	CDS	GC	0.993007	1		0.971805		1		1		No Reads		1		1		1		1		1		0G 16C			1	6	0.857143	0	11	1	0	5	1	1	37	0.973684	0	22	1	0	27	1	0.971805		0	0
CG8547	2R:14262097	CDS	GC	0.575305	0.555531		No Reads		No Reads		No Reads		0		0.257738		0.390243		0.48631		0		0		2G 7C			0	0	#DIV/0!	0	0	#DIV/0!	2	0	0	0	0	#DIV/0!	0	0	#DIV/0!	0	0	#DIV/0!	#DIV/0!		2	0
CG9662	2L:3376230	CDS	GC	0.637411	0.609599		0		0		0		0		0		No Reads		0		No Reads		0		N			104	0	0	81	0	0	82	0	0	271	0	0	245	0	0	104	0	0	0		1	0
CG9917	X:16322480	CDS	GC	0.95625	0.771897		0.823328		0.890744		0.746322		No Reads		0		0		0		0		0		N			24	73	0.752577	11	50	0.819672	25	39	0.609375	15	129	0.895833	8	122	0.938462	6	73	0.924051	0.823328		0	0
Dg	2R:16089649	CDS	GC	1	0.810646		0		0.0238095		0		0		0.5		1		1		0		0		0G 12C			18	0	0	15	0	0	13	0	0	9	0	0	48	0	0	9	0	0	0		19	0
Dg	2R:16088937	CDS	GC	0.863636	0.772588		0		0		0		0		0.5		1		1		0		0		0G 7C			14	0	0	25	0	0	7	0	0	15	0	0	46	0	0	8	0	0	0		14	0
eIF3m	2R:14163780	CDS	GC	0.572654	0.598567		0.000581387		0.000826551		0.00108932		No Reads		0.503968		1		1		0.0333333		0		0G 11C			435	1	0.00229358	437	0	0	345	0	0	836	1	0.00119474	572	0	0	343	0	0	0.000581387		0	0
Gyg	2R:21204833	CDS	GC	0.720782	0.660422		0		0		0		0		0.5		0.990385		1		0		0		0G 8C			17	0	0	6	0	0	2	0	0	18	0	0	50	0	0	18	0	0	0		9	0
janA	3R:30039095	CDS	GC	0.697679	0.598449		0		0		0		No Reads		0.316667		No Reads		No Reads		No Reads		0		3G 4C			103	0	0	59	0	0	73	0	0	190	0	0	202	0	0	78	0	0	0		0	0
kay	3R:29792130	CDS	GC	0.748466	0.670982		0.459819		0.454029		0.513675		0.5		0.816773		0.589166		0.717166		0.0754902		0.0513015		1G 2C			27	25	0.480769	29	31	0.516667	19	21	0.525	65	51	0.439655	36	34	0.485714	31	14	0.311111	0.459819		0	2
Lcp3	2R:8435602	CDS	GC	0	0		No Reads		No Reads		No Reads		No Reads		No Reads		No Reads		No Reads		No Reads		No Reads		N			0	0	#DIV/0!	0	0	#DIV/0!	0	0	#DIV/0!	0	0	#DIV/0!	0	0	#DIV/0!	0	0	#DIV/0!	#DIV/0!		0	0
Lis-1	2R:16182365	CDS	GC	0.615524	0.570235		0.00452837		0.00341363		0.0037712		0		0		0		0.0128205		0		0		N			360	1	0.00277008	376	1	0.00265252	270	1	0.00369004	325	2	0.00611621	456	3	0.00653595	184	1	0.00540541	0.00452837		4	0
mago	2R:21129090	CDS	GC	0.594775	0.763226		0.00175439		0		0		0		0.5		1		No Reads		0		0		0G 18C			50	0	0	72	0	0	53	0	0	118	0	0	94	1	0.0105263	94	0	0	0.00175439		3	0
nclb	2R:10877045	CDS	GC	0.797689	0.832146		0.9993		1		1		No Reads		0.5		No Reads		0		0		No Reads		N			0	29	1	0	59	1	0	36	1	0	110	1	1	237	0.995798	0	40	1	0.9993		0	0
Npl4	3R:25623089	CDS	GC	0.708395	0.821733		0.00120773		0.00189394		0		0.416667		0.35		0.75625		0.414716		0		0		10G 13C			167	0	0	137	1	0.00724638	110	0	0	177	0	0	133	0	0	132	0	0	0.00120773		2	0
pths	2L:21144950	CDS	GC	0.204589	0.307821		0.00063857		0		0		0		0		0		0		0		0		N			79	0	0	58	0	0	85	0	0	260	1	0.00383142	308	0	0	129	0	0	0.00063857		3	0
Ric	2R:16109069	CDS	GC	0.639965	0.648915		0.00203062		0.00178471		0.00346209		0		0.5		1		0.979167		0.0172414		0		0G 5C			3200	2	0.00062461	2691	5	0.0018546	1897	9	0.00472193	1826	1	0.000547345	1009	2	0.00197824	812	2	0.002457	0.00203062		16	0
RpS15Ab	2R:10821974	CDS	GC	0.187451	0.19606		0.330363		0.28946		0.291828		No Reads		0		No Reads		0		0		No Reads		N			305	144	0.320713	291	99	0.253846	270	103	0.276139	49	27	0.355263	32	19	0.372549	65	44	0.40367	0.330363		0	0
shot	2R:13885271	CDS	GC	0.708515	0.745043		No Reads		No Reads		No Reads		0.399038		0.5		1		0.996795		0		0.00326797		0G 9C			0	0	#DIV/0!	2	0	0	0	0	#DIV/0!	10	0	0	0	0	#DIV/0!	3	0	0	#DIV/0!		8	5
stau	2R:18120116	CDS	GC	0.697598	0.68902		0.490015		0.496314		0.5017		0		0		0		0		0		0		N			148	130	0.467626	130	138	0.514925	113	110	0.493274	200	331	0.623352	329	196	0.373333	156	137	0.467577	0.490015		28	0
Ufc1	2R:16007156	CDS	GC	0.593266	0.710797		0		0		0		No Reads		0		No Reads		0		0		0		N			150	0	0	92	0	0	88	0	0	160	0	0	88	0	0	107	0	0	0		1	0
VhaAC45RP	3R:30165819	CDS	GC	0.646782	0.590113		0.00158724		0.00124145		0.00130358		No Reads		0.125942		0.275598		0.240683		0.127193		0.111429		3G 3C			2192	4	0.00182149	1865	3	0.001606	1582	1	0.000631712	1810	2	0.00110375	836	0	0	685	3	0.00436047	0.00158724		2	0
zfh1	3R:30774165	CDS	GC	0.861538	0.552842		0.446005		0.775758		0.476852		0.222222		0.55		0.0489583		0.0192308		0		0.0277778		N			9	10	0.526316	8	3	0.272727	5	4	0.444444	15	12	0.444444	3	4	0.571429	7	5	0.416667	0.446005		1	0
zfh1	3R:30774262	CDS	GC	0.833333	0.572664		0.677778		0.952381		0.716667		No Reads		0.833333		0.287821		0.375		0		0.111111		N			0	5	1	5	5	0.5	1	4	0.8	5	5	0.5	2	3	0.6	3	6	0.666667	0.677778		0	1
Cdc50	X:16440011	CDS	GT	0.738563	0.591294		0		0.00131818		0.00613543		0		0		0		0		0		0		N			172	0	0	174	0	0	174	0	0	272	0	0	165	0	0	208	0	0	0		5	0
CG12054	3R:31229018	CDS	GT	0.832792	0.72549		0.000740741		0		0		0.47909		0.015625		0		0		1		1		N			31	0	0	28	0	0	9	0	0	170	0	0	224	1	0.00444444	47	0	0	0.000740741		6	7
CG12795	2L:3453158	CDS	GT	0.774799	0.689782		0		0		0		0		0		0		0		0		0		N			26	0	0	12	0	0	16	0	0	70	0	0	25	0	0	15	0	0	0		2	0
CG15537	3R:30435560	CDS	GT	0	0.563342		0.495761		0.487525		0.504354		0		0.320378		No Reads		No Reads		0.2		0.666667		1G 8T			161	164	0.504615	185	150	0.447761	119	87	0.42233	454	602	0.570076	295	322	0.52188	218	225	0.507901	0.495761		3	0
CG15537	3R:30435563	CDS	GT	0	0.559666		0.477378		0.460031		0.492289		0		0.29375		No Reads		No Reads		0.2		0.666667		1G 8T			159	157	0.496835	187	141	0.429878	120	78	0.393939	456	555	0.548961	300	305	0.504132	215	207	0.490521	0.477378		3	0
CG1983	3R:30177528	CDS	GT	0.780855	0.97		0.477353		0.510932		0.283476		No Reads		0.5		No Reads		1		0.25		0		4G 10T			20	6	0.230769	19	20	0.512821	5	18	0.782609	44	27	0.380282	41	42	0.506024	17	14	0.451613	0.477353		1	0
CG1983	3R:30177369	CDS	GT	0.657148	0.753013		0.480284		0.462833		0.37479		No Reads		0.3375		No Reads		0.875		0		0		2G 8T			34	16	0.32	11	12	0.521739	2	8	0.8	55	24	0.303797	53	41	0.43617	17	17	0.5	0.480284		0	0
CG3556	X:4532575	CDS	GT	0.841585	0.538424		0.750501		0.475104		0.823216		No Reads		0.477273		0.946023		1		0		0		0G 6T			55	320	0.853333	31	231	0.881679	37	170	0.821256	351	673	0.657227	204	317	0.608445	96	205	0.681063	0.750501		1	0
CG3955	2R:13128744	CDS	GT	0.686425	0.707787		0.483544		0.486762		0.608405		No Reads		0		0		0		0		0		N			90	115	0.560976	87	69	0.442308	88	57	0.393103	198	267	0.574194	110	139	0.558233	123	73	0.372449	0.483544		0	0
CG8852	2L:3527152	CDS	GT	0.604651	0.820513		No Reads		No Reads		No Reads		No Reads		No Reads		No Reads		No Reads		0		0		N			0	0	#DIV/0!	0	0	#DIV/0!	0	0	#DIV/0!	0	0	#DIV/0!	0	0	#DIV/0!	0	0	#DIV/0!	#DIV/0!		0	0
Gyg	2R:21205054	CDS	GT	0.642356	0.714461		No Reads		0		0		0		0.5		1		1		0		0		0G 6T			5	0	0	13	0	0	0	0	#DIV/0!	14	0	0	30	0	0	10	0	0	#DIV/0!		10	0
Hmu	3R:27291040	CDS	GT	0.626666	0.694618		0.00205314		0.00271565		0.000898473		No Reads		0.492188		0		0		0		0		N			690	1	0.00144718	396	3	0.0075188	358	0	0	1353	0	0	1189	4	0.00335289	477	0	0	0.00205314		2	0
Ip259	2L:10409446	CDS	GT	0.308372	0.368745		0.00129156		0.00118822		0.00112233		0		0		0		0		0		0		N			767	0	0	616	0	0	578	2	0.00344828	652	0	0	463	2	0.00430108	370	0	0	0.00129156		5	0
kis	2L:240642	CDS	GT	0.245585	0.399143		0		0		0		0		0		0		0		0		0.00746435		N			55	0	0	45	0	0	32	0	0	82	0	0	71	0	0	39	0	0	0		24	0
Mgstl	X:21043979	CDS	GT	0.394319	0.560438		0.656939		0.407705		0.648061		No Reads		0.5		1		1		0		No Reads		1G 10T			31	114	0.786207	23	45	0.661765	29	54	0.650602	126	180	0.588235	98	154	0.611111	119	215	0.643713	0.656939		1	1
MICU1	2L:7185190	CDS	GT	0.824525	0.912525		0.575938		0.473809		0.460399		1		0.5		0		0		0		0		N			11	8	0.421053	5	13	0.722222	7	4	0.363636	26	26	0.5	17	61	0.782051	4	8	0.666667	0.575938		0	18
mts	2L:7831570	CDS	GT	0.596008	0.461179		0.00114764		0.000595185		0.00130629		0.980952		0.0241683		0		0.05		0		0.0263158		N			1481	1	0.000674764	1441	1	0.000693481	1037	4	0.00384246	1847	2	0.00108167	1684	1	0.000593472	947	0	0	0.00114764		0	49
Opa1	2R:14234742	CDS	GT	0.82593	0.833503		0.469659		0.445126		0.511852		0		0.5		1		0.984375		0		0		0G 7T			39	23	0.370968	32	14	0.304348	15	18	0.545455	60	120	0.666667	125	81	0.393204	31	36	0.537313	0.469659		8	0
Prx6c	2R:10419022	CDS	GT	0.754576	0		No Reads		No Reads		No Reads		No Reads		0		0		0		0		0		N			0	0	#DIV/0!	1	0	0	0	0	#DIV/0!	0	0	#DIV/0!	0	0	#DIV/0!	1	0	0	#DIV/0!		0	0
RanBP3	3R:23751935	CDS	GT	0.815798	0.652324		0		0		0		No Reads		0		0		0		1		1		N			17	0	0	27	0	0	13	0	0	64	0	0	61	0	0	22	0	0	0		0	0
RpL21	2L:22247554	CDS	GT	0.173854	0.150792		0.00432992		0.00314661		0.00469084		0		0		0		0		0		0		N			17669	78	0.00439511	11350	63	0.00552002	11932	57	0.00475436	7648	24	0.00312826	4543	4	0.000879701	5166	38	0.00730208	0.00432992		6	0
RpS13	2L:8363926	CDS	GT	0.495785	0.162996		0.00134076		0.00103169		0.00147314		0		0.0017705		0		0		0		0		N			22527	27	0.00119713	18300	29	0.00158219	17099	39	0.00227564	18024	19	0.00105304	7590	7	0.000921416	10825	11	0.00101513	0.00134076		11	0
RpS14b	X:7935615	CDS	GT	0.211984	0.296062		0.48547		0.485946		0.482751		No Reads		0.0108761		0.05		0.25		0.15		0		N			3139	3106	0.497358	1782	2520	0.585774	2130	2685	0.557632	3211	2229	0.409743	1332	953	0.417068	1540	1236	0.445245	0.48547		3	0
RpS15Ab	2R:10821984	CDS	GT	0.188238	0.202793		0.308484		0.287887		0.247025		No Reads		0.0131579		No Reads		No Reads		0		No Reads		N			352	143	0.288889	298	92	0.235897	294	107	0.266833	53	26	0.329114	34	19	0.358491	71	42	0.371681	0.308484		2	0
salr	2L:11373140	CDS	GT	0.767133	0.755104		0		0		0		0		No Reads		No Reads		0		0		0.666667		N			11	0	0	7	0	0	12	0	0	31	0	0	118	0	0	58	0	0	0		7	0
Sou	2R:21016874	CDS	GT	0.62171	0.660397		0.00406504		0		0		No Reads		0.5		1		1		0		0		0G 12T			21	0	0	45	0	0	29	0	0	40	1	0.0243902	34	0	0	27	0	0	0.00406504		0	0
tei	2R:13746561	CDS	GT	0.901333	0.8271		0.00268817		0		0		0.267172		0.5		0		0		1		1		N			15	0	0	11	0	0	8	0	0	67	0	0	61	1	0.016129	55	0	0	0.00268817		15	7
wde	2R:10805304	CDS	GT	0.714518	0.767483		0.0018315		0.00724638		0		0		0		0		0		0		0		N			61	0	0	43	0	0	35	0	0	170	0	0	190	0	0	90	1	0.010989	0.0018315		17	0
bbc	2R:13494301	CDS	TA	0.854179	0.88798		0.367919		0.439014		0.579271		0		0		0		0		0		0		N			61	37	0.377551	51	21	0.291667	40	30	0.428571	45	41	0.476744	66	49	0.426087	23	6	0.206897	0.367919		4	0
Calr	3R:9629470	CDS	TA	0.185529	0.212552		0.00297864		0.00339679		0.0030935		0		0.00259067		0.00609756		0		0.00819672		0		N			2665	2	0.000749906	2333	10	0.00426803	2122	7	0.00328793	3844	19	0.00491846	1725	6	0.0034662	1691	2	0.00118133	0.00297864		2	0
CG31705	2L:11525043	CDS	TA	0.840363	0.720713		0.0280797		0		0		0		0.495036		0.975205		0.981568		0.268005		0.144265		0T 12A			14	0	0	22	1	0.0434783	5	0	0	43	0	0	79	0	0	7	1	0.125	0.0280797		1	0
CG31705	2L:11524851	CDS	TA	0.818568	0.791297		0		0		0		No Reads		0.974245		0.983333		0.956929		0		0.00847458		2T 8A			12	0	0	1	0	0	1	0	0	36	0	0	64	0	0	9	0	0	0		0	0
CG5056	2L:10367236	CDS	TA	0.869311	0.823788		0.461507		0.453396		0.560185		0.491667		0.5		0.916667		0.8		0.3125		0.9		0T 12A			12	5	0.294118	18	10	0.357143	19	17	0.472222	37	24	0.393443	22	37	0.627119	6	10	0.625	0.461507		1	7
Chchd3	3R:31052844	CDS	TA	0.710338	0.688985		1		0		0		No Reads		0.767892		0.675		0.375		0		0		5T 4A			0	59	1	0	79	1	0	51	1	0	224	1	0	375	1	0	178	1	1		0	6
Desat1	3R:12446449	CDS	TA	0.288777	0.417003		0.00220112		0.000740224		0		0		0.000322581		0		0		0		0		N			756	2	0.00263852	706	1	0.00141443	462	1	0.00215983	720	2	0.00277008	577	1	0.0017301	400	1	0.00249377	0.00220112		3	0
eIF4EHP	3R:24107197	CDS	TA	0.70021	0.858818		0.553672		0.450617		0.586029		No Reads		0		0		0		0		0		N			14	21	0.6	15	6	0.285714	6	17	0.73913	29	44	0.60274	58	100	0.632911	21	18	0.461538	0.553672		3	0
Etfb	3R:29802024	CDS	TA	0.577859	0.675562		0		0		0		0		0.321274		0.559524		0.875		0.0454545		0.125		1T 6A			47	0	0	50	0	0	28	0	0	66	0	0	87	0	0	51	0	0	0		1	0
Gar1	2R:21097145	CDS	TA	0.752841	0.610236		No Reads		0.775926		0.166667		No Reads		No Reads		No Reads		No Reads		0		0		0T 2A			1	0	0	0	0	#DIV/0!	2	1	0.333333	6	3	0.333333	3	2	0.4	4	1	0.2	#DIV/0!		0	0
janA	3R:30039305	CDS	TA	0.71294	0.609379		0		0.00473452		0		No Reads		0.365079		1		1		0		No Reads		6T 9A			113	0	0	77	0	0	74	0	0	205	0	0	186	0	0	64	0	0	0		0	0
Mgstl	X:21043931	CDS	TA	0.400906	0.597375		0.682844		0.420733		0.618783		No Reads		0.5		1		1		0		1		0T 6A			46	174	0.790909	24	72	0.75	37	96	0.721805	183	269	0.595133	146	215	0.595568	160	289	0.643653	0.682844		2	2
mRpL32	3R:31253142	CDS	TA	0.559421	0.906045		0		0		0		No Reads		0.175		No Reads		0.75		No Reads		0.75		5T 11A			20	0	0	17	0	0	23	0	0	97	0	0	37	0	0	37	0	0	0		0	0
mRpL34	2R:16099205	CDS	TA	1	1		0		0		0		No Reads		0.5		No Reads		No Reads		No Reads		No Reads		0T 16A			22	0	0	16	0	0	25	0	0	42	0	0	24	0	0	18	0	0	0		0	0
Opa1	2R:14231597	CDS	TA	0.876812	0.955511		0		0		0.004329		0		0.233929		0.481477		0.334821		0		0		5T 5A			75	0	0	51	0	0	40	0	0	106	0	0	128	0	0	51	0	0	0		4	0
Pex19	2L:12094289	CDS	TA	0.670495	0.604116		0.00723036		0.00493566		0.00791199		No Reads		0.0258621		0.118182		0		0		0		N			215	0	0	152	2	0.012987	144	1	0.00689655	181	3	0.0163043	209	0	0	138	1	0.00719424	0.00723036		0	0
Rpn9	3R:23732531	CDS	TA	0.675245	0.653925		0		0.00121655		0		No Reads		0.5		0		0		1		1		N			162	0	0	122	0	0	127	0	0	342	0	0	290	0	0	154	0	0	0		0	1
S2P	2R:11843475	CDS	TA	0.394896	0.419401		0.0445845		0.00340136		0		No Reads		0		0		0		0		0		N			48	1	0.0204082	54	2	0.0357143	23	1	0.0416667	112	2	0.0175439	56	0	0	39	7	0.152174	0.0445845		1	0
stck	3R:8359100	CDS	TA	0	0.526316		0.0227442		0		0.0104167		0		0		0		0		0		0		N			34	0	0	23	2	0.08	22	1	0.0434783	94	0	0	133	0	0	76	1	0.012987	0.0227442		3	0
udd	2R:8106926	CDS	TA	0.849958	0.662783		0		0		0		No Reads		0.5		0.275		0		0		0		11T 9A			20	0	0	28	0	0	35	0	0	49	0	0	103	0	0	43	0	0	0		0	0
Act42A	2R:6014816	CDS	TC	0	0.240741		0.0329895		0.0531012		0.0350376		0		0		0		0		0		0		N			6324	239	0.0364163	5547	181	0.0315992	4665	174	0.0359578	4170	157	0.0362838	2502	52	0.0203602	2270	88	0.0373198	0.0329895		1	0
Act42A	2R:6014822	CDS	TC	0	0.25		0.0406436		0.0717257		0.0410019		0		0		0		0		0		0		N			7914	311	0.0378116	6789	279	0.0394737	5769	282	0.0466039	5070	238	0.044838	2965	71	0.023386	2712	148	0.0517483	0.0406436		2	0
Act5C	X:5903099	CDS	TC	0	0		0.00168822		0.00254992		0.00302914		0		0.00132417		0		0		0		0		N			36672	64	0.00174216	25856	47	0.00181446	21578	29	0.00134216	18201	35	0.00191928	8469	15	0.00176803	7764	12	0.00154321	0.00168822		3	0
Act5C	X:5903621	CDS	TC	0	0		0.00129971		0.00103186		0.00152137		0		0.0021418		0		0		0		0.00492611		N			36341	51	0.00140141	27482	47	0.00170729	22298	26	0.00116467	24423	27	0.00110429	12173	18	0.0014765	10582	10	0.000944109	0.00129971		28	0
Act87E	3R:13427059	CDS	TC	0.153846	0.204837		0.958333		0.53014		No Reads		No Reads		0		0		0		0		0		N			0	6	1	0	8	1	2	6	0.75	0	1	1	0	2	1	0	4	1	0.958333		0	0
Act87E	3R:13426879	CDS	TC	0.133333	0.1875		No Reads		0.711111		No Reads		No Reads		0		0		0.008		0		0.00322581		N			0	0	#DIV/0!	0	1	1	0	0	#DIV/0!	0	0	#DIV/0!	0	0	#DIV/0!	0	0	#DIV/0!	#DIV/0!		0	0
Act87E	3R:13426708	CDS	TC	0	0.681818		No Reads		0		No Reads		0		0		0		0		0		0.00480814		N			0	0	#DIV/0!	0	0	#DIV/0!	1	0	0	6	0	0	0	0	#DIV/0!	0	0	#DIV/0!	#DIV/0!		1	0
Act87E	3R:13426951	CDS	TC	0	0		0.785714		0.43289		No Reads		No Reads		0.0108696		0		0.00378788		0.0112155		0		N			0	10	1	2	4	0.666667	4	10	0.714286	0	8	1	0	6	1	4	2	0.333333	0.785714		0	0
Act87E	3R:13427005	CDS	TC	0	0		0		0.00340136		0.0277778		No Reads		0		0		0.00833333		0		0		N			44	0	0	54	0	0	51	0	0	36	0	0	8	0	0	26	0	0	0		0	0
Arp2	X:16549362	CDS	TC	0.90625	0.94876		0.00108932		0		0		No Reads		0		0		0		0		0		N			43	0	0	54	0	0	45	0	0	152	1	0.00653595	186	0	0	64	0	0	0.00108932		0	0
Cdc50	X:16440703	CDS	TC	0.660761	0.676113		0.00169999		0.003557		0		No Reads		0		0.05		0		0		0		N			192	0	0	219	0	0	153	0	0	349	0	0	227	1	0.00438596	171	1	0.00581395	0.00169999		0	0
CG1532	X:21026588	CDS	TC	0.785859	0.836563		0.76079		0.46639		0.803077		No Reads		0.5		1		1		0		1		0T 9C			4	38	0.904762	5	27	0.84375	3	35	0.921053	28	24	0.461538	33	67	0.67	13	42	0.763636	0.76079		0	0
CG1532	X:21027832	CDS	TC	0.701786	0.794382		0.796747		0.572078		0.893519		0.833333		0.5		1		1		0		1		0T 12C			9	41	0.82	3	25	0.892857	0	12	1	41	31	0.430556	21	86	0.803738	4	20	0.833333	0.796747		1	1
CG15537	3R:30435567	CDS	TC	0	0.557667		0.489284		0.463857		0.485658		0		0.308333		No Reads		No Reads		0.2		0.666667		1T 7C			153	156	0.504854	170	139	0.449838	115	76	0.397906	419	559	0.571575	281	315	0.528523	213	199	0.48301	0.489284		3	0
CG1907	3R:29620486	CDS	TC	0.829975	0.726748		0.524538		0.49843		0.513072		0		1		1		1		0		0		0T 13C			52	33	0.388235	30	31	0.508197	33	51	0.607143	56	142	0.717172	120	126	0.512195	41	29	0.414286	0.524538		5	0
CG1983	3R:30176521	CDS	TC	0.701893	0.733187		0.440699		0.393938		0.366384		0.472222		0.105861		0.557576		No Reads		0		0		5T 3C			37	28	0.430769	24	19	0.44186	23	24	0.510638	91	50	0.35461	106	98	0.480392	31	23	0.425926	0.440699		1	2
CG31140	3R:23976685	CDS	TC	0.76434	0.838373		0.506224		0.495559		0.530717		0		0.5		0		0		1		1		N			254	260	0.505837	200	223	0.527187	142	183	0.563077	221	204	0.48	288	254	0.468635	103	100	0.492611	0.506224		5	0
CG31705	2L:11524209	CDS	TC	0.732454	0.798178		0.00126263		0		0		No Reads		0.455853		0.949951		0.976744		0		0		0T 4C			23	0	0	14	0	0	9	0	0	104	0	0	131	1	0.00757576	21	0	0	0.00126263		0	1
CG33303	2L:10375197	CDS	TC	0.707782	0.750081		0.493286		0.431808		0.471175		No Reads		1		1		1		0.638889		0.785714		0T 19C			151	145	0.489865	176	129	0.422951	76	67	0.468531	294	159	0.350993	82	129	0.611374	48	77	0.616	0.493286		0	2
CG33303	2L:10375153	CDS	TC	0.678961	0.688188		0.472199		0.515475		0.556932		No Reads		1		0		0		0.236111		0.166667		0T 12C			141	138	0.494624	167	102	0.379182	62	51	0.451327	243	159	0.395522	87	140	0.61674	60	59	0.495798	0.472199		0	2
CG33303	2L:10374508	CDS	TC	0.635775	0.748779		0.417068		0.412419		0.372431		1		1		1		1		0.5		0.75		0T 17C			102	91	0.471503	117	69	0.370968	68	55	0.447154	321	169	0.344898	154	127	0.451957	66	47	0.415929	0.417068		0	1
CG3556	X:4533007	CDS	TC	0.785643	0.456609		0.768227		0.455223		0.79646		0.627445		1		0.87748		1		0		0		2T 10C			36	464	0.928	38	259	0.872054	40	218	0.844961	448	849	0.654588	276	481	0.635403	127	263	0.674359	0.768227		13	10
CG42518	2R:18168226	CDS	TC	0.644363	0.676323		0.476939		0.517971		0.441597		0		0.5		No Reads		No Reads		0		0		N			29	42	0.591549	35	28	0.444444	42	27	0.391304	132	74	0.359223	56	81	0.591241	32	30	0.483871	0.476939		3	0
CG44245	2R:21212222	CDS	TC	0.672737	0.951622		0.00617284		0.0143939		0		0.0045045		0.5		1		1		0		0.0192308		0T 9C			26	1	0.037037	28	0	0	21	0	0	163	0	0	99	0	0	71	0	0	0.00617284		73	1
CG44245	2R:21212387	CDS	TC	0.664969	0.928615		0.00713196		0		0		0		1		1		1		0		0		0T 13C			37	0	0	23	0	0	11	0	0	135	3	0.0217391	93	2	0.0210526	74	0	0	0.00713196		74	0
CG44245	2R:21212195	CDS	TC	0.652511	0.93761		0.00368687		0.0208333		0.0166667		0.0102793		0.5		1		1		0		0		0T 9C			25	0	0	28	0	0	24	0	0	163	2	0.0121212	99	1	0.01	72	0	0	0.00368687		58	1
CG4678	X:16709741	CDS	TC	0.808368	0.955556		1		0.997365		1		1		1		1		1		1		0		0T 10C			0	92	1	0	63	1	0	56	1	0	274	1	0	181	1	0	124	1	1		0	5
CG5056	2L:10367133	CDS	TC	0.856903	0.902651		0.435958		0.442048		0.512418		No Reads		0.46875		1		No Reads		0.75		1		0T 7C			16	11	0.407407	11	6	0.352941	15	23	0.605263	26	23	0.469388	15	18	0.545455	13	4	0.235294	0.435958		0	4
CG6191	2R:13581168	CDS	TC	0.836078	0.759463		0.995726		0.995935		1		0.494048		0		0		0		0		0		N			0	40	1	0	41	1	0	18	1	0	152	1	0	90	1	2	76	0.974359	0.995726		5	7
CG7950	3R:30057716	CDS	TC	0.690554	0.66509		0		0.00108578		0.004329		No Reads		0.328125		0.608333		1		0		0		0T 6C			109	0	0	111	0	0	87	0	0	298	0	0	313	0	0	108	0	0	0		0	0
CG8320	2R:15993193	CDS	TC	0.686392	0.752966		0.529653		0.497638		0.484443		No Reads		1		1		1		No Reads		0		0T 14C			21	13	0.382353	25	24	0.489796	13	14	0.518519	71	41	0.366071	34	72	0.679245	16	46	0.741935	0.529653		0	0
CG8768	2R:12691993	CDS	TC	0.934577	0.856852		0.611361		0.498608		0.337251		0		0		0		0		0.8		0.633333		N			8	10	0.555556	3	15	0.833333	10	10	0.5	0	15	1	41	33	0.445946	12	6	0.333333	0.611361		13	0
CG9577	X:20167019	CDS	TC	0.102041	0.688454		0.634099		0.632392		0.840278		No Reads		0.5		1		0.5		0		0		0T 9C			5	10	0.666667	4	5	0.555556	5	6	0.545455	2	27	0.931034	18	12	0.4	5	12	0.705882	0.634099		0	1
CG9662	2L:3376254	CDS	TC	0.650689	0.636485		0		0.00652576		0		0		0		No Reads		0		1		1		N			123	0	0	85	0	0	69	0	0	263	0	0	258	0	0	99	0	0	0		1	0
Chchd3	3R:31052800	CDS	TC	0.678794	0.643347		0.996436		0.993955		0.991228		No Reads		0.749527		0.483333		0.642857		0.641026		0.477564		0T 5C			1	68	0.985507	0	79	1	0	45	1	1	225	0.995575	1	404	0.997531	0	174	1	0.996436		0	0
cindr	3R:30825567	CDS	TC	0.653493	0.571944		0.997653		1		1		0.335498		0.985294		0.958513		1		1		1		3T 14C			0	15	1	0	16	1	0	14	1	1	70	0.985915	0	61	1	0	46	1	0.997653		10	4
Cisd2	3R:29222758	CDS	TC	0.570731	0.635215		0.00462971		0.000768049		0.00146199		No Reads		0.5		0.9375		1		0.153846		0.203947		0T 5C			236	1	0.00421941	175	1	0.00568182	141	1	0.00704225	530	0	0	316	2	0.00628931	219	1	0.00454545	0.00462971		2	0
cm	X:7010044	CDS	TC	0.926136	0.765152		1		0.997602		1		1		1		1		1		0		1		0T 6C			0	49	1	0	41	1	0	21	1	0	52	1	0	60	1	0	29	1	1		0	4
cm	X:7010212	CDS	TC	0.924901	0.721263		1		1		1		No Reads		1		1		1		0		1		0T 9C			0	27	1	0	27	1	0	23	1	0	24	1	0	54	1	0	32	1	1		0	0
cm	X:7009855	CDS	TC	0.91682	0.823232		1		0.995305		0.980392		1		1		1		1		0		0		0T 13C			0	49	1	0	41	1	0	31	1	0	82	1	0	57	1	0	43	1	1		0	5
cm	X:7010779	CDS	TC	0.887755	0.853741		0.989796		0.993399		1		1		0.916667		0.829545		1		0		1		0T 5C			0	30	1	0	45	1	0	39	1	0	24	1	3	46	0.938776	0	29	1	0.989796		0	3
cm	X:7010092	CDS	TC	0.875	0.60876		1		0.99187		1		1		1		1		1		0		1		0T 6C			0	48	1	0	34	1	0	33	1	0	43	1	0	64	1	0	33	1	1		0	3
Cnx99A	3R:29316822	CDS	TC	0.603439	0.627231		0.00304955		0.0026182		0.00362011		0		0.5		1		1		0.680995		0.442857		0T 16C			453	0	0	443	1	0.00225225	321	2	0.00619195	1082	3	0.00276498	665	1	0.0015015	356	2	0.00558659	0.00304955		5	0
COX4	2L:19959779	CDS	TC	0.50698	0.507553		0.00158791		0.00104481		0.00164062		1		0.520159		0.0397557		0.0405405		0.00704225		0		N			2426	2	0.000823723	2233	7	0.003125	1953	1	0.000511771	2635	6	0.00227187	1892	4	0.0021097	1458	1	0.000685401	0.00158791		0	7
CSN4	2R:7973069	CDS	TC	0.79893	0.796662		0.0045045		0.0070922		0		No Reads		0.777778		0.552083		No Reads		0		0		5T 11C			53	0	0	36	1	0.027027	35	0	0	72	0	0	128	0	0	62	0	0	0.0045045		0	0
CycY	2L:11812342	CDS	TC	0.794076	0.909744		0		0		0		0.555556		0.401786		0.96875		1		0		0		2T 7C			74	0	0	63	0	0	64	0	0	141	0	0	27	0	0	42	0	0	0		1	2
Dg	2R:16089645	CDS	TC	1	0.800226		0		0		0		0		0.5		1		1		0		0		0T 12C			20	0	0	16	0	0	13	0	0	10	0	0	47	0	0	9	0	0	0		19	0
Dg	2R:16088949	CDS	TC	0.759167	0.760356		0		0		0		1		0.5		1		1		0		0		0T 10C			17	0	0	22	0	0	8	0	0	14	0	0	47	0	0	8	0	0	0		0	11
Diap2	2R:15932794	CDS	TC	0.912038	0.927475		1		1		1		No Reads		1		0.958333		1		0		0		0T 11C			0	98	1	0	69	1	0	52	1	0	207	1	0	107	1	0	30	1	1		0	4
Drep3	2R:12061699	CDS	TC	0.779426	0.54625		0.999717		0.997512		0.992063		0		0.977273		1		1		1		1		0T 6C			0	391	1	0	402	1	0	345	1	0	531	1	1	588	0.998302	0	271	1	0.999717		1	0
EMC2A	3R:16994934	CDS	TC	0	0.474889		0.0352949		0.0719524		0.0252123		0		0		0		No Reads		0		0		N			146	11	0.0700637	133	3	0.0220588	112	5	0.042735	267	12	0.0430108	200	2	0.00990099	122	3	0.024	0.0352949		4	0
Gar1	2R:21096595	CDS	TC	0.661492	0.79902		0.686162		0.539352		0.675439		No Reads		1		No Reads		1		1		1		0T 16C			2	15	0.882353	1	4	0.8	1	8	0.888889	46	41	0.471264	20	27	0.574468	23	23	0.5	0.686162		0	0
Gint3	2R:18659841	CDS	TC	0.701472	0.772198		0.474356		0.513883		0.443086		No Reads		0.515625		1		1		0		0		0T 18C			51	54	0.514286	54	51	0.485714	61	58	0.487395	65	97	0.598765	133	84	0.387097	37	22	0.372881	0.474356		0	4
gkt	2L:3161173	CDS	TC	1	0.957702		0.0113857		0		0		No Reads		0		No Reads		0		0		No Reads		N			52	0	0	55	0	0	25	0	0	225	0	0	171	1	0.00581395	30	2	0.0625	0.0113857		0	0
gkt	2L:3161068	CDS	TC	0.831169	0.918601		0		0.0018018		0		No Reads		No Reads		0		0		0		0		N			47	0	0	30	0	0	23	0	0	258	0	0	183	0	0	43	0	0	0		0	0
Gp93	3R:27949392	CDS	TC	0.635808	0.690066		0.00151515		0.00483092		0.0376984		No Reads		0.5		1		1		1		1		0T 19C			123	0	0	149	0	0	109	1	0.00909091	127	0	0	204	0	0	116	0	0	0.00151515		0	0
Gp93	3R:27949353	CDS	TC	0.552436	0.575271		0.004937		0.00263505		0.0402357		No Reads		0.5		1		1		1		1		0T 18C			116	1	0.00854701	139	1	0.00714286	80	0	0	138	0	0	213	1	0.0046729	107	1	0.00925926	0.004937		0	0
Gycalpha99B	3R:29685168	CDS	TC	0.806968	0.788165		0.511218		0.522492		0.551212		0		1		1		1		0.467391		0.466667		0T 10C			384	441	0.534545	492	514	0.510934	306	348	0.53211	424	460	0.520362	312	365	0.539143	298	225	0.43021	0.511218		2	0
Gyg	2R:21205090	CDS	TC	0.683496	0.706564		0.708279		0.499455		0.604167		0		0.5		1		1		1		1		0T 14C			3	2	0.4	3	6	0.666667	0	2	1	7	11	0.611111	7	27	0.794118	2	7	0.777778	0.708279		6	0
Gyg	2R:21205147	CDS	TC	0.682968	0.738676		0.530359		0.510454		0.612698		0		0.5		1		1		1		1		0T 14C			3	2	0.4	10	6	0.375	1	4	0.8	10	13	0.565217	8	23	0.741935	7	3	0.3	0.530359		15	0
Gyg	2R:21205391	CDS	TC	0.682836	0.6889		0.439239		0.438371		0.354497		0		0.5		1		1		1		0.99		0T 13C			6	6	0.5	9	6	0.4	4	0	0	18	11	0.37931	10	16	0.615385	7	20	0.740741	0.439239		21	0
Gyg	2R:21205505	CDS	TC	0.667094	0.720909		0.700847		0.385293		0.584395		0		0.491379		1		1		1		1		0T 23C			4	3	0.428571	2	6	0.75	0	1	1	19	17	0.472222	4	10	0.714286	4	21	0.84	0.700847		41	0
Gyg	2R:21205479	CDS	TC	0.664213	0.698698		No Reads		0.377959		0.505848		0.0144928		0.5		1		1		1		1		0T 20C			7	4	0.363636	3	9	0.75	0	0	#DIV/0!	23	19	0.452381	3	9	0.75	5	18	0.782609	#DIV/0!		45	0
Hacd2	2L:13444924	CDS	TC	0.773978	0.816017		0.00787194		0		0		0		0		0.100482		0.125		1		1		N			74	1	0.0133333	89	0	0	56	0	0	148	0	0	117	0	0	57	2	0.0338983	0.00787194		4	0
hiw	X:15010886	CDS	TC	0.894863	0.887802		0.99562		1		1		1		1		0.986111		1		0.0277778		1		0T 7C			0	30	1	0	33	1	0	15	1	1	139	0.992857	4	205	0.980861	0	107	1	0.99562		0	55
Hmu	3R:27290032	CDS	TC	0.72978	0.593589		0.0039307		0.00133889		0.00392581		No Reads		0.6		0.278536		0.0657895		1		1		N			493	0	0	257	1	0.00387597	271	0	0	758	3	0.00394218	677	2	0.00294551	231	3	0.0128205	0.0039307		0	1
Hmu	3R:27290212	CDS	TC	0.676902	0.631618		0.00139202		0.00241205		0.00254453		No Reads		0.58539		0.186601		0.135965		1		1		9T 4C			468	1	0.0021322	281	1	0.0035461	211	0	0	746	2	0.0026738	610	0	0	213	0	0	0.00139202		0	1
Hydr2	2L:3163979	CDS	TC	0.950175	0.952381		0		0.00462963		0		0		0		0		0		0		0		N			108	0	0	87	0	0	59	0	0	83	0	0	113	0	0	53	0	0	0		11	0
ics	2L:13641174	CDS	TC	0.668477	0.790165		0.00326797		0		0.0123457		No Reads		0		0		0		0		0		N			24	0	0	23	0	0	21	0	0	50	1	0.0196078	16	0	0	38	0	0	0.00326797		0	0
Idgf4	X:9928423	CDS	TC	0.669059	0.552433		No Reads		0		No Reads		1		0.5		0.96875		1		0.0232558		1		0T 6C			1	0	0	0	0	#DIV/0!	0	0	#DIV/0!	0	0	#DIV/0!	9	0	0	8	0	0	#DIV/0!		0	12
Jasper	3R:30053063	CDS	TC	0.849562	0.783911		0.0021645		0.00401606		0.0325203		No Reads		0.4375		0.483333		0.45		0		0		1T 2C			64	0	0	55	0	0	56	0	0	110	0	0	76	1	0.012987	76	0	0	0.0021645		1	0
Jasper	3R:30054251	CDS	TC	0.843229	0.819721		0.00441576		0		0		0		0.266667		No Reads		No Reads		0		0		1T 10C			94	0	0	91	1	0.0108696	63	1	0.015625	179	0	0	178	0	0	125	0	0	0.00441576		2	0
Lcp3	2R:8435568	CDS	TC	0.177305	0		No Reads		No Reads		No Reads		No Reads		No Reads		No Reads		No Reads		No Reads		No Reads		N			0	0	#DIV/0!	0	0	#DIV/0!	0	0	#DIV/0!	0	0	#DIV/0!	0	0	#DIV/0!	0	0	#DIV/0!	#DIV/0!		0	0
Lcp3	2R:8435571	CDS	TC	0	0		No Reads		No Reads		No Reads		No Reads		No Reads		No Reads		No Reads		No Reads		No Reads		N			0	0	#DIV/0!	0	0	#DIV/0!	0	0	#DIV/0!	0	0	#DIV/0!	0	0	#DIV/0!	0	0	#DIV/0!	#DIV/0!		0	0
Lcp3	2R:8435603	CDS	TC	0	0		No Reads		No Reads		No Reads		No Reads		No Reads		No Reads		No Reads		No Reads		No Reads		N			0	0	#DIV/0!	0	0	#DIV/0!	0	0	#DIV/0!	0	0	#DIV/0!	0	0	#DIV/0!	0	0	#DIV/0!	#DIV/0!		0	0
Lis-1	2R:16182260	CDS	TC	0.570186	0.494504		0.00373987		0.00351493		0.0047162		0		0		0		0		0.00757576		0		N			310	0	0	321	1	0.00310559	231	2	0.00858369	332	2	0.00598802	515	0	0	209	1	0.0047619	0.00373987		3	0
Lrp4	X:15919668	CDS	TC	0.90101	0.679341		0.00118203		0		0		0		0.5		1		1		1		1		0T 19C			103	0	0	123	0	0	57	0	0	259	0	0	248	0	0	140	1	0.0070922	0.00118203		10	0
LSm3	3R:23996640	CDS	TC	0.827611	0.631313		0.564806		0.531701		0.577932		No Reads		0.5		No Reads		No Reads		1		No Reads		0T 15C			13	26	0.666667	25	19	0.431818	7	17	0.708333	44	46	0.511111	30	27	0.473684	29	43	0.597222	0.564806		0	1
Map60	2R:9591422	CDS	TC	0.826259	0.806971		0.002849		0		0		0		0.479167		0.928571		0.9		0		0		5T 12C			115	2	0.017094	74	0	0	75	0	0	109	0	0	137	0	0	49	0	0	0.002849		5	0
metro	2R:11227317	CDS	TC	0.700103	0.84423		0.411347		0.417807		0.455767		0		0.5		0.015625		0		0		0		N			56	30	0.348837	39	22	0.360656	26	18	0.409091	147	95	0.392562	95	77	0.447674	53	55	0.509259	0.411347		7	0
MICU1	2L:7184938	CDS	TC	0.723105	0.896661		0		0.00854701		0		0.511538		0		No Reads		0		1		No Reads		N			21	0	0	17	0	0	13	0	0	57	0	0	73	0	0	14	0	0	0		3	2
mRpS16	2R:14173073	CDS	TC	0.634455	0.785261		0.25639		0.497015		0.575475		0		0.5		No Reads		No Reads		No Reads		0		0T 8C			14	3	0.176471	23	11	0.323529	15	8	0.347826	50	13	0.206349	45	20	0.307692	28	6	0.176471	0.25639		1	0
ncm	2L:18445836	CDS	TC	0.781375	0.864364		0.00132538		0		0		0		0		No Reads		No Reads		No Reads		No Reads		N			17	0	0	16	0	0	16	0	0	499	4	0.00795229	96	0	0	50	0	0	0.00132538		6	0
ND-B15	2R:14756883	CDS	TC	0.617271	0.514294		0.000532481		0		0		No Reads		0		0		0		0		0		N			135	0	0	168	0	0	160	0	0	312	1	0.00319489	158	0	0	135	0	0	0.000532481		6	0
Opa1	2R:14231615	CDS	TC	0.888889	0.970391		0.0046804		0.00228311		0		0		0.197893		0.363095		0.420168		0		0		6T 5C			85	0	0	50	1	0.0196078	39	0	0	117	1	0.00847458	134	0	0	51	0	0	0.0046804		5	0
Opa1	2R:14231614	CDS	TC	0.876812	0.965556		0.00362319		0		0		0		0.201587		0.369674		0.420168		0		0		5T 5C			82	0	0	48	0	0	39	0	0	117	0	0	129	0	0	45	1	0.0217391	0.00362319		5	0
Pex19	2L:12093901	CDS	TC	0.709458	0.707175		0.000859107		0		0		No Reads		0.0608696		0.0699962		0		1		1		N			183	0	0	139	0	0	112	0	0	193	1	0.00515464	190	0	0	145	0	0	0.000859107		0	0
Pex19	2L:12094626	CDS	TC	0.683193	0.670321		0.00373075		0.00142383		0		No Reads		0		0.03125		0		1		1		N			327	0	0	214	1	0.00465116	185	2	0.0106952	299	0	0	407	1	0.00245098	217	1	0.00458716	0.00373075		2	0
Pglym78	3R:29149130	CDS	TC	0.497752	0.515982		0.00254195		0.00279878		0.00340811		0		0.497475		1		1		0		0.00819672		0T 9C			6815	24	0.00350928	5529	16	0.00288548	4800	11	0.00228643	5461	11	0.00201023	3379	11	0.00324484	3796	5	0.00131544	0.00254195		1	0
Prosbeta1	2R:16014304	CDS	TC	0.567354	0.658715		0.00191958		0.000574713		0.00110742		No Reads		0		0		No Reads		0		0		N			486	1	0.00205339	390	1	0.00255754	292	0	0	827	2	0.00241255	532	1	0.00187617	381	1	0.0026178	0.00191958		0	0
Prx6c	2R:10418983	CDS	TC	0.207424	0.216761		No Reads		No Reads		No Reads		No Reads		0		No Reads		No Reads		0.3875		0.346154		N			0	0	#DIV/0!	0	0	#DIV/0!	0	0	#DIV/0!	0	0	#DIV/0!	0	0	#DIV/0!	1	0	0	#DIV/0!		0	0
Rack1	2L:7825809	CDS	TC	0.586628	0.538761		0.489676		0.475038		0.470118		1		0.018437		0		0		0		0		N			4269	3843	0.473743	2537	2288	0.474197	2916	2647	0.475822	4749	5397	0.531934	2528	2318	0.478333	2587	2629	0.504026	0.489676		0	4
rhea	3L:8564546	CDS	TC	0.441762	0.445216		0.343254		0.277778		0		0		0		0		0		0.00757576		0		N			6	1	0.142857	2	0	0	10	0	0	3	1	0.25	1	2	0.666667	0	2	1	0.343254		3	0
Ric	2R:16109661	CDS	TC	0.57318	0.645813		0.00188788		0.00209764		0.00135962		0		0.5		0.984375		1		0		0		0T 6C			2186	6	0.00273723	2037	1	0.000490677	1420	4	0.00280899	1425	1	0.000701262	759	1	0.00131579	609	2	0.00327332	0.00188788		5	0
Ric	2R:16109667	CDS	TC	0.555168	0.649586		0.00172047		0.00122556		0		0		0.5		1		1		0.0166667		0		0T 8C			2347	6	0.00254994	2190	7	0.00318616	1503	0	0	1515	1	0.000659631	818	2	0.00243902	671	1	0.0014881	0.00172047		5	0
Roe1	2R:13555257	CDS	TC	0.809428	0.832937		0.457044		0.430974		0.448413		0.952381		0.5		0		0		0		0		N			19	13	0.40625	13	11	0.458333	15	15	0.5	30	32	0.516129	31	46	0.597403	39	14	0.264151	0.457044		0	6
Rpn6	2R:14751310	CDS	TC	0.62825	0.533172		0.533778		0.515537		0.493487		0		0		0		0		0		0		N			158	192	0.548571	162	172	0.51497	99	130	0.567686	167	179	0.517341	185	181	0.494536	122	155	0.559567	0.533778		3	0
RpS11	2R:12200182	CDS	TC	0.495834	0.485403		0.00185772		0.00183354		0.00266452		0		0.00144509		0		0		0.0185185		0		N			24313	54	0.00221611	16708	44	0.00262655	19122	39	0.00203538	14960	15	0.00100167	6278	8	0.00127267	9510	19	0.00199391	0.00185772		7	0
RpS14b	X:7935678	CDS	TC	0.128289	0		0.115617		0.143884		0.125019		0		0.00206612		0.0357143		0		0		0		N			1256	172	0.120448	818	151	0.155831	970	191	0.164513	2227	202	0.0831618	1284	97	0.070239	1095	121	0.0995066	0.115617		1	0
RpS14b	X:7935663	CDS	TC	0	0		0.187592		0.215667		0.189393		0		0		0		0		0		0		N			1816	563	0.236654	1158	316	0.214383	1363	409	0.230813	2447	420	0.146495	1236	164	0.117143	1234	271	0.180066	0.187592		2	0
RpS3	3R:23359255	CDS	TC	0.466707	0.4917		0.00407562		0.00430339		0.0404495		No Reads		0.50121		0		0		1		1		N			5917	10	0.00168719	4607	22	0.00475265	4588	15	0.00325874	5573	22	0.00393208	3743	20	0.00531491	3611	20	0.00550812	0.00407562		0	1
RpS8	3R:29862959	CDS	TC	0.475064	0.493233		0.0016937		0.00172064		0.00160062		0		0.303982		0.622818		0.69269		0.00549451		0		3T 6C			21729	31	0.00142463	16904	30	0.00177158	16707	31	0.00185207	18841	35	0.00185421	8953	14	0.00156128	10580	18	0.00169843	0.0016937		4	0
Sec13	3R:23358145	CDS	TC	0.794744	0.651766		0		0		0		0		0		No Reads		0		1		1		N			126	0	0	105	0	0	75	0	0	455	0	0	325	0	0	223	0	0	0		1	0
Sec13	3R:23357786	CDS	TC	0.788976	0.754785		0.00713818		0.00134409		0.00260417		No Reads		0.5		0		0		1		1		N			205	1	0.00485437	152	6	0.0379747	134	0	0	442	0	0	350	0	0	191	0	0	0.00713818		0	0
shot	2R:13884557	CDS	TC	1	0.799307		No Reads		No Reads		No Reads		0.269231		0.5		0.995455		1		0		0		0T 10C			0	0	#DIV/0!	6	0	0	0	0	#DIV/0!	53	0	0	0	0	#DIV/0!	6	0	0	#DIV/0!		11	2
shot	2R:13885607	CDS	TC	0.843277	0.746271		No Reads		No Reads		No Reads		0.217445		1		1		1		0.00367647		0.00757576		0T 11C			3	0	0	0	0	#DIV/0!	0	0	#DIV/0!	0	0	#DIV/0!	0	0	#DIV/0!	2	0	0	#DIV/0!		25	8
shot	2R:13885268	CDS	TC	0.653585	0.745637		No Reads		No Reads		No Reads		0.39095		0.5		0.996835		1		0.0117373		0.00581317		0T 7C			0	0	#DIV/0!	2	0	0	0	0	#DIV/0!	9	0	0	0	0	#DIV/0!	3	0	0	#DIV/0!		8	5
ThrRS	2L:12106174	CDS	TC	0.640198	0.529054		0.534152		0.518169		0.542415		No Reads		0.0435606		0.141667		0.125		1		1		N			318	312	0.495238	183	175	0.488827	176	205	0.538058	544	588	0.519435	354	689	0.660594	180	182	0.502762	0.534152		0	2
ThrRS	2L:12106057	CDS	TC	0.605422	0.525086		0.517121		0.508857		0.522153		1		0.109375		0.125		0.333333		1		1		9T 7C			314	275	0.466893	191	175	0.478142	162	182	0.52907	545	540	0.497696	370	707	0.656453	175	158	0.474474	0.517121		0	3
ThrRS	2L:12106306	CDS	TC	0.60224	0.549141		0.999541		0.998777		1		1		0.5		1		1		1		1		1T 4C			0	442	1	0	299	1	0	262	1	3	1086	0.997245	0	1065	1	0	347	1	0.999541		0	2
toc	2L:3127443	CDS	TC	0.942382	0.914286		No Reads		0		0		0		0		0		0		0		0		N			12	0	0	9	0	0	2	0	0	36	0	0	0	0	#DIV/0!	6	0	0	#DIV/0!		108	0
Ufc1	2R:16007177	CDS	TC	0.812317	0.721971		0.519644		0.518751		0.573977		0		0.53125		No Reads		1		0		0		0T 12C			72	85	0.541401	44	59	0.572816	42	44	0.511628	60	99	0.622642	54	31	0.364706	53	54	0.504673	0.519644		1	0
Vha100-1	3R:29136580	CDS	TC	0.669435	0.652316		0.00191501		0		0.00146843		0		0.5		1		1		0		0		0T 9C			600	1	0.00166389	484	2	0.00411523	334	0	0	943	1	0.00105932	520	1	0.00191939	365	1	0.00273224	0.00191501		35	0
VhaAC45RP	3R:30165771	CDS	TC	0.644158	0.588067		0.000707438		0.00119482		0.00167607		0		0.12654		0.146466		0.191667		0		0		5T 3C			2019	4	0.00197726	1785	1	0.00055991	1393	0	0	1754	3	0.00170746	790	0	0	722	0	0	0.000707438		3	0
VhaSFD	2L:16724477	CDS	TC	0.63292	0.752015		0.00219231		0.000818439		0		0		0.493421		0		0.0277778		1		1		N			486	2	0.00409836	477	1	0.00209205	335	0	0	466	0	0	346	1	0.00288184	244	1	0.00408163	0.00219231		6	0
vib	3R:19217980	CDS	TC	0.673252	0.637863		0.00102167		0.52977		0.473633		0.577965		0.526989		1		1		1		1		0T 19C			127	0	0	101	0	0	91	0	0	455	1	0.00219298	311	0	0	253	1	0.00393701	0.00102167		14	35
Zasp52	2R:15763673	CDS	TC	0.186047	1		No Reads		No Reads		No Reads		No Reads		0.00657895		0		0		0		0		N			0	0	#DIV/0!	0	0	#DIV/0!	0	0	#DIV/0!	0	0	#DIV/0!	3	0	0	0	0	#DIV/0!	#DIV/0!		1	0
zfh1	3R:30774220	CDS	TC	1	0.526707		0.590537		0.749673		0.488889		No Reads		No Reads		0.357143		0.385417		0		0		N			2	7	0.777778	7	2	0.222222	3	4	0.571429	6	7	0.538462	1	5	0.833333	2	3	0.6	0.590537		0	0
zfh1	3R:30774223	CDS	TC	1	0.535485		0.61567		0.749673		0.504762		No Reads		No Reads		0.302994		0.42915		0		0		N			1	7	0.875	7	2	0.222222	3	5	0.625	6	7	0.538462	1	5	0.833333	2	3	0.6	0.61567		0	0
zfh1	3R:30774524	CDS	TC	0.791667	0.646388		0.612892		0.616501		0.555556		No Reads		0.541667		0.352381		0.22619		1		1		N			6	7	0.538462	11	7	0.388889	8	8	0.5	6	14	0.7	1	3	0.75	1	4	0.8	0.612892		0	0
zfh1	3R:30773703	CDS	TC	0.724387	0.543079		0.573677		0.619048		0.527778		0.540741		0.605556		0.295504		0.225		1		1		5T 10C			2	7	0.777778	3	2	0.4	2	5	0.714286	5	20	0.8	3	1	0.25	4	4	0.5	0.573677		4	5
Zip99C	3R:29864027	CDS	TC	0.869464	0.818448		0		0		0		No Reads		0.5		1		1		1		1		0T 16C			32	0	0	11	0	0	13	0	0	35	0	0	29	0	0	26	0	0	0		0	5
Zip99C	3R:29864435	CDS	TC	0.836057	0.86954		0		0.00469484		0		No Reads		0.333333		0.625		0.583333		0.0416667		0		6T 5C			36	0	0	12	0	0	38	0	0	4	0	0	31	0	0	18	0	0	0		3	0
Act42A	2R:6014819	CDS	TG	0	0.265306		0.0432146		0.0690114		0.0368563		0		0		0		0		0		0		N			6937	307	0.0423799	6096	257	0.0404533	5100	278	0.0516921	4558	240	0.0500208	2760	61	0.0216235	2460	138	0.0531178	0.0432146		1	0
Act5C	X:5903213	CDS	TG	0	0		0.00424915		0.00704949		0.00692039		0		0.00137792		0		0.00179211		0		0.00204918		N			36702	141	0.00382705	26476	99	0.00372531	22047	96	0.00433546	19212	88	0.00455959	8903	36	0.0040273	8126	41	0.0050202	0.00424915		4	0
CG1902	2R:9603962	CDS	TG	0.792952	0.642101		0		0		0.00641026		No Reads		0.411058		0.65625		0.95		0		0		0T 14G			110	0	0	90	0	0	48	0	0	93	0	0	76	0	0	41	0	0	0		0	0
CG2444	X:11704545	CDS	TG	0.917647	0.62166		No Reads		No Reads		No Reads		No Reads		No Reads		No Reads		No Reads		1		No Reads		N			0	0	#DIV/0!	6	0	0	0	0	#DIV/0!	0	0	#DIV/0!	0	0	#DIV/0!	0	0	#DIV/0!	#DIV/0!		0	0
CG32264	3L:3717406	CDS	TG	0.652849	0.596066		0.00192655		0.00155039		0		0		0		0		0		0		0		N			115	0	0	154	0	0	96	0	0	385	1	0.00259067	442	4	0.00896861	299	0	0	0.00192655		67	0
CG34015	X:16447808	CDS	TG	0.620235	0.8531		0.00773868		0.00411523		0		No Reads		0		No Reads		No Reads		0		No Reads		N			21	0	0	18	0	0	11	0	0	32	1	0.030303	61	1	0.016129	21	0	0	0.00773868		2	0
CG42813	3R:27228330	CDS	TG	0.63654	0.641297		0.00173868		0.000832293		0.00505051		No Reads		0		0		0		0		0		N			176	0	0	141	1	0.00704225	94	0	0	420	0	0	294	1	0.00338983	253	0	0	0.00173868		0	0
CG44245	2R:21212213	CDS	TG	0.675129	0.94975		0.00173611		0.00292398		0.00833333		0.0045045		0.5		1		1		0		0		0T 10G			25	0	0	28	0	0	21	0	0	168	0	0	95	1	0.0104167	78	0	0	0.00173611		73	1
CG44245	2R:21211985	CDS	TG	0.623293	0.955585		0		0.0163934		0		0		0.5		1		1		0		0		0T 10G			39	0	0	24	0	0	16	0	0	141	0	0	96	0	0	50	0	0	0		29	0
CG6191	2R:13581069	CDS	TG	0.844268	0.673737		0.998227		1		1		0		0.00862069		0.0357143		0		0		0		N			0	34	1	0	61	1	0	20	1	0	240	1	0	107	1	1	93	0.989362	0.998227		23	0
CG9743	3R:30198790	CDS	TG	0.786186	0.577722		0.560329		0.460054		0.396675		No Reads		0.400568		0.78125		0.583333		0		0		3T 3G			3	1	0.25	3	11	0.785714	4	8	0.666667	7	32	0.820513	43	44	0.505747	10	5	0.333333	0.560329		0	0
Chchd3	3R:31052880	CDS	TG	0.717295	0.662949		0.999199		0.999244		0.993333		No Reads		0.807049		0.351984		0.660714		0		0		N			0	66	1	0	75	1	0	52	1	1	207	0.995192	0	388	1	0	161	1	0.999199		0	2
cm	X:7009942	CDS	TG	0.924786	0.758929		1		0.992063		1		1		1		1		1		0		0		0T 9G			0	43	1	0	60	1	0	39	1	0	37	1	0	55	1	0	37	1	1		0	5
dj-1beta	3R:30807875	CDS	TG	0.518902	0.508789		1		1		0.950287		No Reads		0.793056		No Reads		1		0		No Reads		9T 10G			0	79	1	0	73	1	0	38	1	0	165	1	0	118	1	0	113	1	1		4	2
fsd	2R:13231214	CDS	TG	0.948718	0.974026		0.608439		0.568936		0.446349		No Reads		0		0		No Reads		0		0		N			5	10	0.666667	10	3	0.230769	4	9	0.692308	13	38	0.745098	7	31	0.815789	25	25	0.5	0.608439		0	0
Gycalpha99B	3R:29685123	CDS	TG	0.819924	0.793296		0.519258		0.504034		0.539305		No Reads		1		1		1		0.880848		0.929654		0T 11G			354	436	0.551899	471	476	0.50264	308	335	0.520995	413	490	0.542636	298	407	0.577305	312	226	0.420074	0.519258		6	0
Hmu	3R:27291055	CDS	TG	0.620461	0.693746		0.00130851		0.00275022		0.0044356		No Reads		0.493056		0		0		0		0		N			706	0	0	420	2	0.00473934	369	0	0	1351	3	0.00221566	1115	1	0.000896057	472	0	0	0.00130851		2	0
Hydr2	2L:3164021	CDS	TG	0.941667	0.931973		0		0.00157233		0		0		0		0.0125		0		0		0		N			115	0	0	88	0	0	62	0	0	87	0	0	108	0	0	60	0	0	0		9	0
Lcp3	2R:8435569	CDS	TG	0	0		No Reads		No Reads		No Reads		No Reads		No Reads		No Reads		No Reads		No Reads		No Reads		N			0	0	#DIV/0!	0	0	#DIV/0!	0	0	#DIV/0!	0	0	#DIV/0!	0	0	#DIV/0!	0	0	#DIV/0!	#DIV/0!		0	0
Lcp3	2R:8435598	CDS	TG	0	0		No Reads		No Reads		No Reads		No Reads		No Reads		No Reads		No Reads		No Reads		No Reads		N			0	0	#DIV/0!	0	0	#DIV/0!	0	0	#DIV/0!	0	0	#DIV/0!	0	0	#DIV/0!	0	0	#DIV/0!	#DIV/0!		0	0
LysRS	X:9607824	CDS	TG	0.615955	0.683952		0.997751		0.998527		0.995605		No Reads		1		1		1		0		0		0T 9G			4	1017	0.996082	0	367	1	1	494	0.99798	3	1584	0.99811	1	1293	0.999227	2	407	0.99511	0.997751		0	0
Map60	2R:9591946	CDS	TG	0.816754	0.757252		0.00228311		0		0		0		0.4375		0.875		0.75		0		0		2T 9G			107	0	0	85	0	0	64	0	0	89	0	0	144	2	0.0136986	33	0	0	0.00228311		2	0
MICU1	2L:7184947	CDS	TG	0.736792	0.899361		0		0		0		0.972222		0.458333		No Reads		1		1		1		1T 15G			21	0	0	14	0	0	13	0	0	55	0	0	64	0	0	9	0	0	0		0	5
Pglym78	3R:29149049	CDS	TG	0.528203	0.537823		0.00129631		0.00127361		0.00128338		No Reads		0.5		1		1		0		0.0151515		0T 12G			5487	7	0.00127412	4725	1	0.000211595	4038	4	0.000989609	4791	14	0.00291363	3001	1	0.000333111	3398	7	0.0020558	0.00129631		2	0
Polr2E	2R:10898374	CDS	TG	0.683657	0.713519		0.551728		0.561085		0.53634		No Reads		0		No Reads		No Reads		No Reads		No Reads		N			23	41	0.640625	33	20	0.377358	18	21	0.538462	63	70	0.526316	42	79	0.652893	37	50	0.574713	0.551728		2	0
Prp8	2R:12162508	CDS	TG	0.711732	0.516459		0.411765		0.222222		0.666667		No Reads		No Reads		1		0.952381		0.590909		0.445175		0T 10G			0	2	1	9	8	0.470588	7	2	0.222222	4	14	0.777778	3	0	0	3	0	0	0.411765		1	0
ReepB	2R:14172328	CDS	TG	0.567592	0.533249		0.496252		0.477524		0.505231		0		0.5		1		0.944444		0		0		0T 17G			530	424	0.444444	384	396	0.507692	366	416	0.531969	579	491	0.458879	343	340	0.497804	246	285	0.536723	0.496252		2	0
salr	2L:11373158	CDS	TG	0.777752	0.804292		0.00133333		0		0.0166667		0		0		0		0		0		No Reads		N			12	0	0	6	0	0	15	0	0	30	0	0	124	1	0.008	71	0	0	0.00133333		8	0
Sec13	3R:23357632	CDS	TG	0.800259	0.761408		0.00295922		0.000754148		0.00444444		No Reads		0		0		0		1		1		N			158	1	0.00628931	164	1	0.00606061	112	0	0	455	0	0	309	0	0	184	1	0.00540541	0.00295922		0	0
shot	2R:13885323	CDS	TG	0.678932	0.64122		No Reads		0		No Reads		0		0.5		1		1		0		0.00310559		0T 19G			1	0	0	5	0	0	0	0	#DIV/0!	0	0	#DIV/0!	0	0	#DIV/0!	1	0	0	#DIV/0!		17	0
TpnC47D	2R:11274764	CDS	TG	0	0		No Reads		No Reads		No Reads		No Reads		No Reads		No Reads		No Reads		No Reads		0		N			0	0	#DIV/0!	0	0	#DIV/0!	0	0	#DIV/0!	0	0	#DIV/0!	0	0	#DIV/0!	0	0	#DIV/0!	#DIV/0!		0	0
amon	3R:26703756	CDS	AC	0.706523	0.571428		0.00450721		0.00162852		0.00383142		0		0.987805		0.954033		0.883469		0.00806452		0		0A 11C			578	2	0.00344828	503	3	0.00592885	352	0	0	473	3	0.00630252	261	3	0.0113636	179	0	0	0.00450721		5	0
capt	2L:1152892	CDS	AC	0.301181	0.2617		0		0		0		No Reads		0		0.0192308		0.0238095		0.0459559		0		N			23	0	0	14	0	0	17	0	0	43	0	0	27	0	0	20	0	0	0		2	0
Cdc50	X:16439832	CDS	AC	0.69882	0.651007		0.0015708		0.00314621		0		0		0		0		0		0		0		N			225	1	0.00442478	194	0	0	199	1	0.005	412	0	0	214	0	0	251	0	0	0.0015708		4	0
CG16704	2L:3692202	CDS	AC	0.887324	0.688666		No Reads		No Reads		No Reads		0		0		No Reads		0		No Reads		1		N			0	0	#DIV/0!	0	0	#DIV/0!	0	0	#DIV/0!	0	0	#DIV/0!	0	0	#DIV/0!	0	0	#DIV/0!	#DIV/0!		1	0
CG2269	2R:10094389	CDS	AC	0.645832	0.591859		0.000924886		0.000798657		0.00250857		1		0.405934		0.768057		0.761364		0.00568182		0.00909091		6A 12C			6407	3	0.000468019	4336	6	0.00138185	3755	2	0.00053234	4349	4	0.000918907	2219	5	0.0022482	1798	0	0	0.000924886		0	25
CG33303	2L:10375492	CDS	AC	0.700924	0.716823		0.467184		0.434808		0.431251		No Reads		1		1		1		0.766234		0.85		0A 10C			95	67	0.41358	80	59	0.42446	59	31	0.344444	133	106	0.443515	28	80	0.740741	31	24	0.436364	0.467184		0	0
CG6329	2R:13830968	CDS	AC	0.508939	0.627506		0.00169478		0.00196787		0.0017011		0		0.00263158		0		0		0		0		N			1805	0	0	1219	2	0.001638	1270	5	0.00392157	2919	5	0.00170999	1782	1	0.000560852	1280	3	0.00233827	0.00169478		22	0
CG8405	2R:16048589	CDS	AC	0.713877	0.760314		0.0104167		0		0		0		0.5		1		1		0		0		0A 17C			22	0	0	17	0	0	15	1	0.0625	15	0	0	19	0	0	15	0	0	0.0104167		8	0
CG8768	2R:12691822	CDS	AC	0.961722	0.81717		0.567869		0.515296		0.387108		0		No Reads		No Reads		0		0		0		N			12	10	0.454545	20	21	0.512195	11	10	0.47619	0	13	1	55	29	0.345238	8	13	0.619048	0.567869		3	0
CG9577	X:20167102	CDS	AC	0.165909	0.692732		0.674173		0.607937		0.848485		No Reads		0.5		1		1		0.973684		0		0A 10C			7	12	0.631579	1	7	0.875	2	10	0.833333	7	35	0.833333	20	19	0.487179	16	10	0.384615	0.674173		0	0
cm	X:7010077	CDS	AC	0.895833	0.763514		1		0.998246		1		1		1		1		1		0		0.833333		0A 7C			0	46	1	0	32	1	0	31	1	0	46	1	0	66	1	0	31	1	1		0	6
Gar1	2R:21097115	CDS	AC	0.787013	0.655254		No Reads		0.45		0.777778		No Reads		1		No Reads		1		1		1		0A 2C			0	4	1	0	0	#DIV/0!	1	5	0.833333	4	14	0.777778	10	11	0.52381	11	5	0.3125	#DIV/0!		0	0
Gar1	2R:21097136	CDS	AC	0.704928	0.526714		No Reads		0.366667		0.722222		No Reads		No Reads		No Reads		No Reads		1		1		0A 2C			1	0	0	0	0	#DIV/0!	2	1	0.333333	4	5	0.555556	3	3	0.5	4	2	0.333333	#DIV/0!		0	0
GstT1	2R:9606672	CDS	AC	0.849871	0.888112		0		0		0		No Reads		0.438636		0.6875		0.660714		0		0		0A 4C			24	0	0	5	0	0	16	0	0	11	0	0	79	0	0	4	0	0	0		0	0
Jupiter	3R:11592562	CDS	AC	0.177944	0.185982		0.00540164		0.0117815		0.0128205		0		0.00694444		0		0		0.0434783		0.016129		N			95	1	0.0104167	75	0	0	61	0	0	199	1	0.005	140	1	0.0070922	100	1	0.00990099	0.00540164		17	0
Lipt1	2R:16198143	CDS	AC	0.644961	0.588235		0		0.00497512		0		0		0		0		0		0		0		N			46	0	0	58	0	0	38	0	0	78	0	0	87	0	0	65	0	0	0		2	0
mRpL22	X:16784936	CDS	AC	0.72447	0.938454		0.994612		0.997312		1		1		0.5		1		1		1		1		0A 11C			0	55	1	0	50	1	1	47	0.979167	0	106	1	0	76	1	1	86	0.988506	0.994612		0	1
Non1	2R:9397142	CDS	AC	0.584655	0.746053		0		0.00363621		0		No Reads		0.415374		0.863945		0.898333		0		0		3A 9C			244	0	0	233	0	0	183	0	0	233	0	0	190	0	0	200	0	0	0		0	0
Pex19	2L:12094069	CDS	AC	0.709407	0.652086		0.00155112		0.00243662		0		No Reads		0.0402778		0.05		0.125		1		1		N			250	0	0	185	0	0	137	0	0	243	1	0.00409836	191	1	0.00520833	116	0	0	0.00155112		0	0
ReepB	2R:14172453	CDS	AC	0.552315	0.529115		0.486039		0.467663		0.482159		0		0.5		1		1		0		0		0A 17C			606	513	0.458445	530	452	0.460285	467	430	0.479376	671	580	0.463629	378	432	0.533333	328	357	0.521168	0.486039		5	0
Ric	2R:16108823	CDS	AC	0.593353	0.654932		0.467694		0.504762		0.516246		1		0.509259		0		0		1		1		N			1314	1351	0.506942	1237	1133	0.478059	832	847	0.504467	845	773	0.47775	622	387	0.383548	464	388	0.455399	0.467694		0	23
RpL13A	3R:5625129	CDS	AC	0.607197	0.452068		0.00288305		0.00266605		0.00283331		0		0.0014908		0		0		0		0.0108696		N			19691	69	0.0034919	18450	56	0.00302605	16092	46	0.00285042	12339	37	0.00298966	5862	12	0.0020429	7571	22	0.00289741	0.00288305		5	0
SelT	2L:5011196	CDS	AC	0.59492	0		0.000669344		0		0		No Reads		0		0		0		No Reads		0		N			253	0	0	208	0	0	197	0	0	248	1	0.00401606	146	0	0	236	0	0	0.000669344		0	0
spas	3R:24039180	CDS	AC	0.714118	0.728784		0		0.0136766		0		No Reads		No Reads		0		0		1		0.97619		N			58	0	0	59	0	0	41	0	0	112	0	0	36	0	0	55	0	0	0		3	0
Syx5	2L:16308307	CDS	AC	0.829402	0.692658		0		0		0		0		0		0		0		0		0		N			45	0	0	52	0	0	62	0	0	119	0	0	61	0	0	20	0	0	0		2	0
[truncated: 76 more columns]

## Sheet: Info on downloaded datasets
	GSM ID	SRR name	Description
from Cypranowska et al. Biorxiv 2024:
GEO Accession ID: GSE250462	GSM7979414	SRR27275811	OK6>mCherry-NLS, empty
	GSM7979415	SRR27275810	OK6>mCherry-NLS, empty
	GSM7979416	SRR27275809	OK6>mCherry-NLS, empty
	GSM7979417	SRR27275808	OK6>mCherry-NLS, empty
	GSM7979418	SRR27275807	OK6>mCherry-NLS, empty
	GSM7979419	SRR27275806	OK6>mCherry-NLS, empty
	GSM7979420	SRR27275805	OK6>mCherry-NLS, RbpRNAi
	GSM7979421	SRR27275804	OK6>mCherry-NLS, RbpRNAi
	GSM7979422	SRR27275803	OK6>mCherry-NLS, RbpRNAi
	GSM7979423	SRR27275802	OK6>mCherry-NLS, unc13RNAi
	GSM7979424	SRR27275801	OK6>mCherry-NLS, unc13RNAi
	GSM7979425	SRR27275800	OK6>mCherry-NLS, unc13RNAi
from Rodriguez et al. Mol Cell 2012:	GSM914102	SRR485848	Nascentseq_Fly_ZT2_R1 yw -- yellow white, earliest time point, nascent
GSE 37232	GSM914107	SRR485853	Nascentseq_Fly_ZT22_R1 yw-- yellow white, latest time point, nascent
	GSM914108	SRR485854	Nascentseq_Fly_ZT2_R2 yw-- yellow white, earliest time point, nascent
	GSM914113	SRR485859	Nascentseq_Fly_ZT22_R2 yw-- yellow white, latest time point, nascent
	GSM915213	SRR486218	pAseq_Fly_ZT2_yw -- yellow white, earliest time point, mature
	GSM915214	SRR486219	pAseq_Fly_ZT14_yw -- yellow white, latest time point, mature
	GSM915215	SRR486220	pAseq_Fly_ZT0_PE CS -- CantonS, paired end, earliest time point, mature
	GSM915220	SRR486225	pAseq_Fly_ZT20_PE CS-- CantonS, paired end, latest time point, mature
	GSM914114	SRR485860	Nascentseq_Fly_yw_R1 -- yellow white, nascent
	GSM914115	SRR485861	Nascentseq_Fly_yw_R2 -- yellow white, nascent
	GSM914116	SRR485862	Nascentseq_Fly_FM7a_R1 -- FM7a, nascent
	GSM914117	SRR485863	Nascentseq_Fly_FM7a_R2 -- FM7a, nascent
	GSM914118	SRR485864	Nascentseq_Fly_ADAR0_R1 -- ADAR-null, nascent
	GSM914119	SRR485865	Nascentseq_Fly_ADAR0_R2 -- ADAR-null, nascent
	GSM914095	SRR485845	gDNA_Fly_yw -- genomic DNA
from Sapiro et al. PNAS 2019:
GSE 113663	GSM3110802	SRR7063235	UAS-unc84-2XGFP; elav-GAL4
	GSM3110803	SRR7063236	UAS-unc84-2XGFP; elav-GAL4
	GSM3110804	SRR7063237	UAS-unc84-2XGFP; elav-GAL4
